## Single-cell RNA sequencing of human femoral head *in vivo*

Xiang Qiu<sup>1</sup>, Ying Liu<sup>4</sup>, Hui Shen<sup>2</sup>, Zun Wang<sup>3</sup>, Yun Gong<sup>2</sup>, Junxiao Yang<sup>5</sup>, Xiaohua Li<sup>4</sup>, Huixi Zhang<sup>4</sup>, Yu Chen<sup>4</sup>, Cui Zhou<sup>4</sup>, Wanqiang Lv<sup>1</sup>, Liang Cheng<sup>6</sup>, Yihe Hu<sup>5</sup>, Boyang Li<sup>1</sup>, Wendi Shen<sup>1</sup>, Xuezheng Zhu<sup>1</sup>, Li-Jun Tan<sup>4</sup>, Hong-Mei Xiao<sup>1</sup>, Hong-Wen Deng<sup>1,2</sup>

<sup>1</sup>Center for System Biology, Data Sciences, and Reproductive Health, School of Basic Medical Science, Central South University, Yuelu, Changsha 410013, China

<sup>2</sup>Tulane Center of Biomedical Informatics and Genomics, Deming Department of Medicine, School of Medicine, Tulane University, New Orleans, LA 70112, USA

<sup>3</sup>Xiangya Nursing School, Central South University, Changsha 410013, China

<sup>4</sup>Laboratory of Molecular and Statistical Genetics, College of Life Sciences, Human Normal University, Changsha 410081, China

<sup>5</sup>Department of Orthopedics, Xiangya Hospital, Central South University, Changsha 410008, China

<sup>6</sup>Department of Orthopedics and National Clinical Research Center for Geriatric Disorders, Xiangya Hospital, Central South University, Changsha 410008, China

**Correspondence to:** Hong-Wen Deng, Hong-Mei Xiao; email: [hdeng2@tulane.edu](mailto:hdeng2@tulane.edu), [hmxiao@csu.edu.cn](mailto:hmxiao@csu.edu.cn)

**Keywords:** single-cell RNA sequencing, bone cell, immune cell, bone metabolism, cell-cell communication

**Received:** December 23, 2020

**Accepted:** May 13, 2021

**Published:** June 10, 2021

**Copyright:** © 2021 Qiu et al. This is an open access article distributed under the terms of the [Creative Commons Attribution License](https://creativecommons.org/licenses/by/3.0/) (CC BY 3.0), which permits unrestricted use, distribution, and reproduction in any medium, provided the original author and source are credited.

### ABSTRACT

The homeostasis of bone metabolism depends on the coupling and precise regulation of various types of cells in bone tissue. However, the communication and interaction between bone tissue cells at the single-cell level remains poorly understood. Thus, we performed single-cell RNA sequencing (scRNA-seq) on the primary human femoral head tissue cells (FHTCs). Nine cell types were identified in 26,574 primary human FHTCs, including granulocytes, T cells, monocytes, B cells, red blood cells, osteoblastic lineage cells, endothelial cells, endothelial progenitor cells (EPCs) and plasmacytoid dendritic cells. We identified *serine protease 23 (PRSS23)* and *matrix remodeling associated protein 8 (MXRA8)* as novel bone metabolism-related genes. Additionally, we found that several subtypes of monocytes, T cells and B cells were related to bone metabolism. Cell-cell communication analysis showed that collagen, chemokine, transforming growth factor and their ligands have significant roles in the crosstalks between FHTCs. In particular, EPCs communicated with osteoblastic lineage cells closely via the "COL2A1-ITGB1" interaction pair. Collectively, this study provided an initial characterization of the cellular composition of the human FHTCs and the complex crosstalks between them at the single-cell level. It is a unique starting resource for in-depth insights into bone metabolism.

### INTRODUCTION

Compared with other tissues in the body, bone is a relatively dynamic organ, which undergoes significant turnover during life [1]. The coupling and precise regulation between bone cells affect the homeostasis of bone metabolism, including bone formation by osteoblast, bone resorption by osteoclast and regulation

by osteocyte [2, 3]. In addition, bone microenvironment is a complex system containing various other types of cells, such as stromal cell, immune cells, endothelial cells, which also influence bone metabolism via complex crosstalks [4]. For instance, monocytes can regulate bone remodeling by secretion of various cytokines, such as bone morphogenetic protein 2 (BMP2) which in turn promote the osteogenic

differentiation by mesenchymal stem/stromal cells [5]. Resting T cells have a protective role of bone [6], while activated T cells increase the production of receptor activator of NF-kappaB ligand (RANKL) and tumor necrosis factor alpha (TNF- $\alpha$ ) to promote osteoclast formation and subsequent bone loss under inflammatory conditions [7]. B cells can regulate osteoclastogenesis by expressing osteoclast differentiation factor (ODF)/RANKL [8]. However, current strategies for bone study are based on whole cell population of bone by bulk sequencing of all the cells for bone tissue [9, 10]. The approach ignores the heterogeneity between individual cells and lack the accuracy and resolution to characterize regulation and crosstalks between bone tissue cells.

Single-cell RNA sequencing (scRNA-seq) provides an opportunity to explore the heterogeneity of complex tissues and cell-to-cell interactions at high resolution [11, 12]. Although flow cytometry is a prominent technique for categorizing cells, which can identify the single cell through the expression of both cell surface and (or) intracellular proteins, it has been limited to probing a few selected proteins [13, 14]. Similarly, magnetic activated cell sorting (MACS) and immunohistochemistry (IHC) also have this limitation. And *in situ* hybridization (ISH) has been limited to probing a few selected RNAs. These single-cell approaches can only focus on information of the selected RNAs or proteins [13], while scRNA-seq can provide a broad characterization of the transcriptome profile. Besides, compared with the traditional bulk-RNA sequencing, scRNA-seq provides information of cellular biology at higher resolution and with more accuracy [15]. scRNA-seq has been successfully applied to reveal the transcriptional diversity of murine bone marrow-derived mesenchymal stem cells (BM-MSCs) [16], and to identify differential expression genes (DEGs) between human Wharton's jelly stem cells and human BM-MSCs [17]. However, the cellular composition of bone tissue cells and the crosstalks between them at single-cell resolution remains unknown.

Here, we applied scRNA-seq technology to characterize cellular heterogeneity at single-cell level in freshly isolated bone tissue cells from human femoral head. We identified *serine protease 23 (PRSS23)* and *matrix remodeling associated protein 8 (MXRA8)* as novel bone metabolism-related genes. Moreover, we defined distinct subtypes of monocytes, T and B cells in bone microenvironment. We further discussed their relationship with bone metabolism and re-constructed the communication networks of cells in human femoral head. We believe that the global single-cell profile of how different types of human femoral head tissue cells

work together would promote our comprehensive understanding of bone metabolism, and provide some novel insights into the prevention and treatment of skeletal diseases, such as osteoporosis and osteoarthritis.

## RESULTS

### scRNA-seq analysis reveals distinct cell types in human femoral head

We performed scRNA-seq analyses on femoral head tissue cells from four human subjects (Figure 1A). The gene expression profiles between samples have a strong correlation, suggesting that there is no obvious batch effect between samples ( $R > 0.96$ ; Supplementary Figure 1). After merging of the four datasets and QC, we obtained a cell-gene matrix of 26,574 cells, with an average of 1035 genes detected per cell (Figure 1B). Then we clustered cells into 16 distinct clusters (Figure 1C), and identified the cluster-specific markers (Figure 1D).

Among these clusters, we identified that, 1) clusters C01, C02, C04, C11 were *CD11b<sup>+</sup>CD66b<sup>+</sup>* granulocytes; 2) cluster C03 was *CD3<sup>+</sup>* T cells; 3) clusters C05 and C13 were *CD14<sup>+</sup>* monocytes; 4) clusters C06, C08, C12 were *CD19<sup>+</sup>CD79A<sup>+</sup>CD20<sup>+</sup>* B cells; 5) clusters C07 and C10 were *CD235a<sup>+</sup>* red blood cells (RBCs); 6) cluster C09 was osteoblastic lineage cells; 7) cluster C14 was *CD31<sup>+</sup>VWF<sup>+</sup>* endothelial cells (ECs); 8) cluster C15 was *CD117<sup>+</sup>CD133<sup>+</sup>* endothelial progenitor cells (EPCs); 9) cluster C16 was *GZMB<sup>+</sup>IL3RA<sup>+</sup>* plasmacytoid dendritic cells (PDCs). Proportions of each cluster and each cell type were shown in Figure 1E, respectively.

### Functional analyses and hub genes identification for DEGs of osteoblastic lineage cells

The osteoblastic lineage cells were a complex cell population which contained BM-MSCs, osteoblasts, osteocytes and chondrocytes, and we showed the expression of cell-specific markers by the violin plot (Supplementary Figure 2A).

To further study the biological functions of osteoblastic lineage cells, we performed GO and KEGG enrichment analyses based on the DEGs of osteoblastic lineage cells (Supplementary Tables 2, 3). GO enrichment analysis identified abundant terms related to bone metabolism, such as “extracellular structure organization”, “extracellular matrix organization”, “establishment of protein localization to organelle”, “skeletal system development”, and “ossification” (Supplementary Figure 2B). Several signal pathways related to bone

metabolism were revealed by KEGG enrichment analysis (Supplementary Figure 2B), such as “PI3K-Akt signaling pathway”, “Rap1 signaling pathway”, and “TGF-beta signaling pathway”.

To identify the hub genes, which are genes with a high degree of connectivity, in the DEGs of osteoblastic lineage cells, a PPI network of DEGs was constructed (Supplementary Figure 2C), and the top 20 hub genes with a high degree of connectivity were detected (Figure 2A). These top 20 hub genes were enriched in the process related to bone metabolism (Supplementary Table 4 and Supplementary Figure 2D), such as “extracellular structure organization”, “extracellular matrix organization”, “ossification”, “skeletal system

development” and “osteoblast differentiation”. We also detect seven significant modules in the PPI network (Figure 2B and Supplementary Figure 2E, Supplementary Table 5). We used genes in the most significant module, module 1 (score = 19.097, with 32 nodes and 296 edges) for a GO enrichment analysis (Supplementary Figure 2D and Supplementary Table 6), and found that genes in module 1 were significantly related to extracellular structure, extracellular matrix, collagen fibril, ossification, skeletal system, etc. The biological process analysis of the top 16 genes in module 1 was shown in Supplementary Figure 2F.

Among the hub genes in the DEGs network and the hub genes in the most significant module (module 1) of the

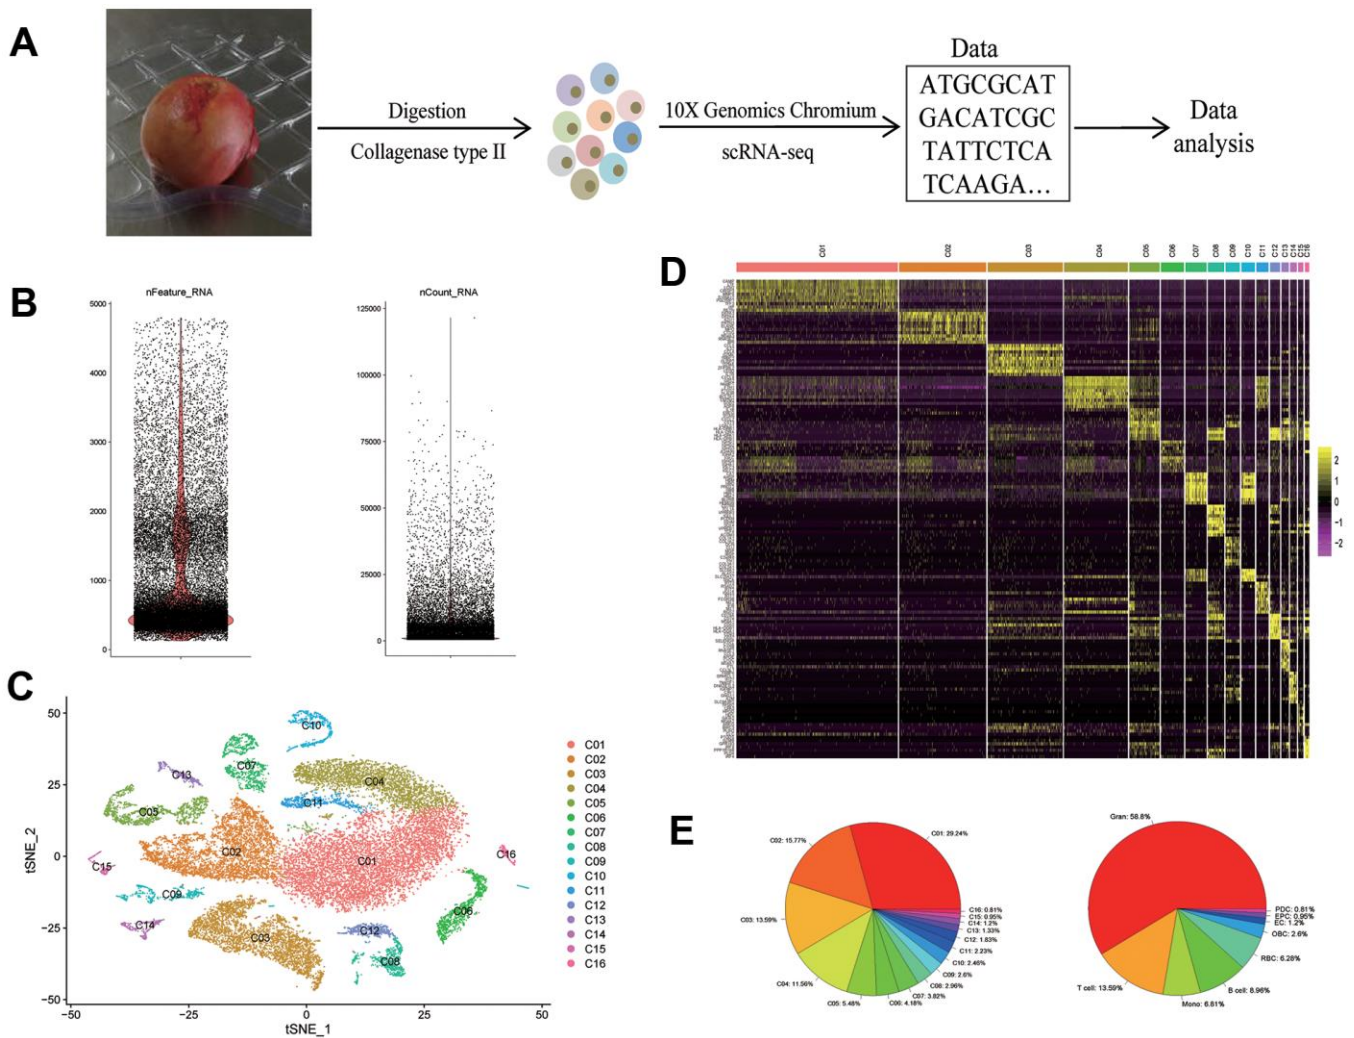

**Figure 1. scRNA-seq reveals the cell populations of the human femoral head. (A)** Study overview. **(B)** After QC, the number of genes (left) and RNA molecules (right). **(C)** t-SNE plot shows the color-coded clustering of human femoral head tissue cells. **(D)** Heat map shows the top 10 genes with the highest avg\_logFC of each cluster. **(E)** The proportion of each cluster (left) and each cell type (right). scRNA-seq: single-cell RNA sequencing; Gran: granulocyte; Mono: monocyte; RBC: red blood cell; OBC: osteoblastic lineage cell; EC: endothelial cell; EPC: endothelial progenitor cell; PDC: plasmacytoid dendritic cell.

PPI network, we found that most of these genes were known to be related to bone metabolism (Supplementary Table 7). However, two genes, *PRSS23* and *MXRA8*, were rarely reported to regulate bone metabolism. In addition, *PRSS23* was highly expressed in osteoblast precursors and early osteoblasts (pre-osteoblast and undetermined osteoblast) (Figure 2C), and *MXRA8* was highly expressed in both BM-MSCs and osteoblasts (Figure 2D). During the process of osteogenic differentiation by BM-MSCs *in vitro*, the expression levels of *PRSS23* and *MXRA8* were significantly increased (Figure 2E). Therefore, we

speculate that *PRSS23* and *MXRA8* may play important roles in bone metabolism.

### scRNA-seq analysis reveals distinct subtypes in monocytes, T cells and B cells in human femoral head

To study the cellular heterogeneity of monocytes, T cells and B cells in bone tissue, we extracted 1,810 CD14<sup>+</sup> monocytes, 3,612 CD3<sup>+</sup> T cells and 2,382 CD19<sup>+</sup>CD79<sup>+</sup>CD20<sup>+</sup> B cells from the original dataset for further analyses.

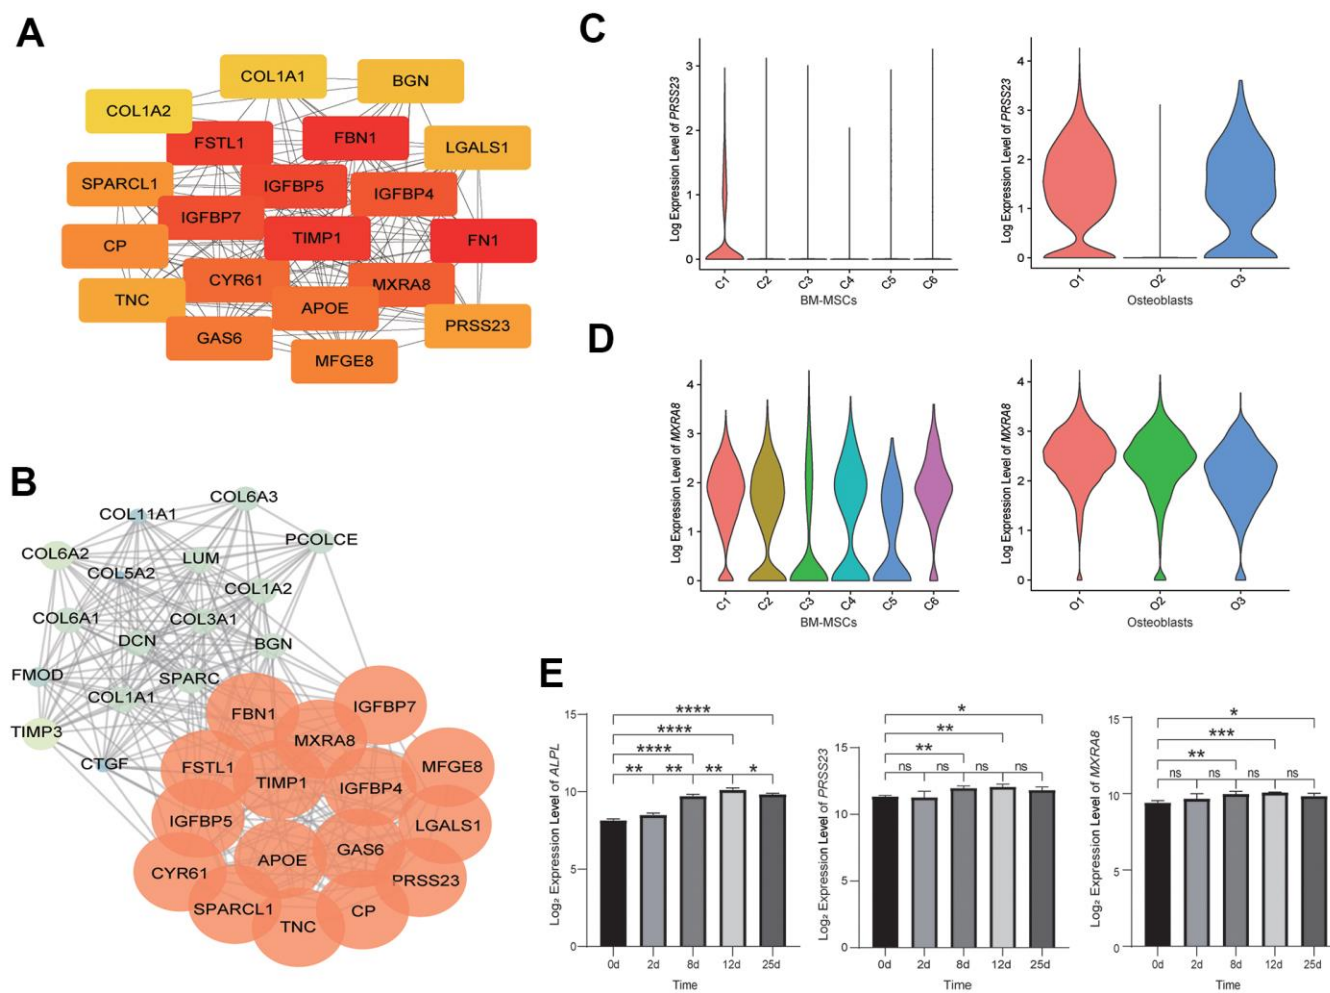

**Figure 2. Analysis of osteoblastic lineage cells.** (A) Gene network analysis of DEGs. The top 20 hub genes in the network. The color changes from yellow to red, indicating low to high connectivity. (B) The top MCODE-score module (module 1) screened from the PPI network. The color changes from blue to red, indicating low to high MCODE-score. (C) The expression level of *PRSS23* in BM-MSCs (left) and osteoblasts (right). C1: osteoblast precursor; C2: adipocyte precursor; C3: terminal 1; C4: terminal 2; C5: contaminated; C6: chondrocyte precursor; O1: pre-osteoblast (early osteoblast); O2: mature osteoblast; O3: undetermined osteoblast (early osteoblast). (D) The expression level of *MXRA8* in BM-MSCs (left) and osteoblasts (right). (E) The expression levels of *alkaline phosphatase (ALPL)*, *PRSS23* and *MXRA8* during *in vitro* osteogenic differentiation from BM-MSCs (left to right). X-axis represents time (days) of induce differentiation and y-axis reflects log<sub>2</sub>-normalized gene expression levels. Stars indicate significance level of gene expression difference between two samples by t-test. ns, not significant; \*, *p* value < 0.05; \*\*, *p* value < 0.01; \*\*\*, *p* value < 0.001; \*\*\*\*, *p* value < 0.0001.

Among the monocytes (Figure 3A–3C), we identified three putative subtypes: *IL1B*<sup>+</sup> monocytes (M1), *C1QA*<sup>+</sup> monocytes (M2), and *MS4A3*<sup>+</sup> granulocyte-monocyte progenitors (M3). In the T cells (Supplementary Figure

4D–4F), we identified one CD4 cluster (T1), and six CD8 clusters: *GZMK*<sup>+</sup>*CCL4L2*<sup>+</sup> T cells (T2), *CCR7*<sup>+</sup> T cells (T3), *GZMK*<sup>+</sup>*CCR6*<sup>+</sup> T cells (T4), *GZMB*<sup>+</sup>*GNLY*<sup>+</sup> T cells (T5), *GZMK*<sup>+</sup>*CXCL8*<sup>+</sup> T cells (T6), and

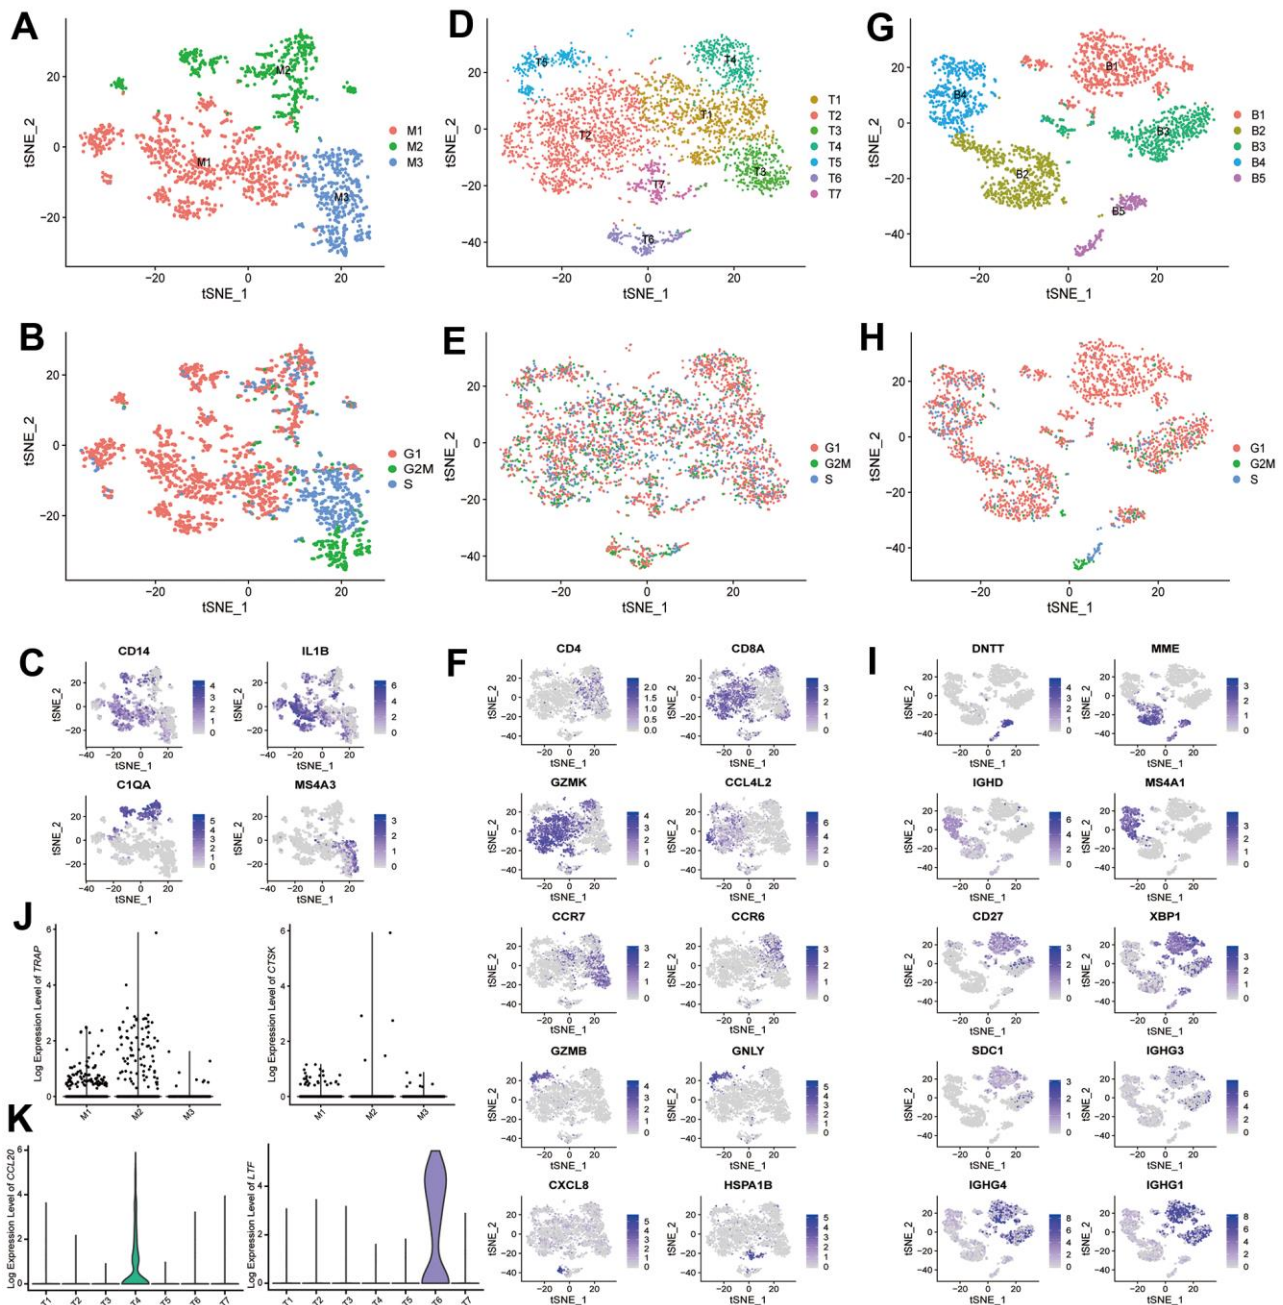

**Figure 3. scRNA-seq analysis reveals different cell subtypes in monocytes, T cells and B cells.** (A) t-SNE plot shows the color-coded clustering for monocytes. Monocytes: M1-M3. (B) t-SNE plot shows the cell cycle status of monocytes. (C) Monocyte subtypes signature genes, embedded on t-SNE dimension reduction map, and colored by gene expression levels. (D) t-SNE plot shows the color-coded clustering for T cells. T cells: T1-T7. (E) t-SNE plot shows the cell cycle status of T cells. (F) T cell subtypes signature genes, embedded on t-SNE dimension reduction map, and colored by gene expression levels. (G) t-SNE plot shows the color-coded clustering for B cells. B cells: B1-B5. (H) t-SNE plot shows the cell cycle status of B cells. (I) B cell subtypes signature genes, embedded on t-SNE dimension reduction map, and colored by gene expression levels. (J) The expression level of *TRAP* (left) and *CTSK* (right) in monocytes subtypes. (K) The expression level of *CCL20* (left) and *LTF* (right) in T cells subtypes.

*GZMK*<sup>+</sup>*HSPA1A*<sup>+</sup> T cells (T7). Within the B cells (Figure 3G–3I), we identified *DNTT*<sup>+</sup>/*MME*<sup>+</sup> pre-B cell (B2 and B5), *MSHA1*<sup>+</sup> mature/activated B cell (B4), CD27<sup>+</sup> memory B cell (B3), and a plasmablast cluster (B1) with high expression of immunoglobulin genes and *XBPI* (a transcription factor for plasma cell differentiation) [18].

GO and KEGG enrichment analyses suggested that several of these subtypes were involved in the regulation of bone metabolism (Table 1 and Figures 4–7 and Supplementary Tables 8–13), including *IL1B*<sup>+</sup> monocytes (M1), CD4 T cells (T1), *GZMK*<sup>+</sup>*CCL4L2*<sup>+</sup> T cells (T2), *GZMK*<sup>+</sup>*CCR6*<sup>+</sup> T cells (T4), *GZMB*<sup>+</sup>*GNLY*<sup>+</sup> T cells (T5), *GZMK*<sup>+</sup>*CXCL8*<sup>+</sup> T cells (T6), *DNTT*<sup>+</sup>/*MME*<sup>+</sup> pre-B cell (only B5), and *MSHA1*<sup>+</sup> mature/activated B cell (B4).

### Complex inter-cellular communication networks in human femoral head

We identified ligand-receptor pairs and molecular interactions among bone tissue cells (except granulocytes) (Figure 8A). Cognate receptors with broadcast ligands were detected, demonstrating extensive communication between osteoblastic lineage cells and other types of cells (Figure 8A, 8B). Our results suggested that chemokine, transforming growth factor and collagen had significant roles in inter-cellular communications (Figure 8C). The "CXCL12-CXCR4" interaction pair played important role in the crosstalks between bone tissue cells. Previous studies have reported that the CXCL12/CXCR4 signaling was involved in the regulation of bone homeostasis [19–21]. Notably, the "COL2A1-ITGB1" interaction pair was significant in the crosstalk between EPCs and osteoblastic lineage cells (Figure 8C). Additionally, compared with other cells, monocytes could act through COL1A1-/COL1A2-CD44 interaction pairs to perform closer cell communication (measured with interaction score) with osteoblastic lineage cells (Figure 8C).

## DISCUSSION

Bone is a complex tissue and undergoes modeling/remodeling constantly during life [22]. Various types of cells are involved in the regulation of bone homeostasis, such as bone cells, stromal cell, immune cells, endothelial cells, which also communicate with each other closely [4]. Therefore, it is fundamental to study the cellular composition of the bone tissue cells and the crosstalks between them. In this study, we applied scRNA-seq analyses on freshly isolated bone tissue cells from human femoral head. We identified two novel bone metabolism-related genes, *PRSS23* and *MXRA8*. We discovered several subtypes of immune

cells (monocytes, T cells and B cells) that may be involved in the regulation of bone metabolism. Finally, the cell-cell communication analysis suggested complex inter-cellular communication networks among human femoral head tissue cells, and the close crosstalk between EPCs and osteoblastic lineage cells via the "COL2A1-ITGB1" interaction pair. Our results provided an initial systematic dissection of human femoral head tissue at single-cell resolution and a global single-cell profile of how different cells work together in human femoral head.

To avoid potential alternation of transcriptome profiles caused by *in vitro* operations (e.g. culturing) [23], we performed scRNA-seq on the freshly isolated primary femoral head tissue cells. In addition, we identified two novel bone metabolism-related genes, *PRSS23* and *MXRA8*, by analyzing the PPI network constructed from DEGs in osteoblastic lineage cells, and showed that the expression of these two genes were significantly increased during *in vitro* osteogenic differentiation. Based on our recent scRNA-seq data of BM-MSCs [24] and osteoblasts [25], *PRSS23* was highly expressed in the osteoblast precursors and early osteoblasts (pre-osteoblast and undetermined osteoblast). This result suggested that *PRSS23* may promote the differentiation of BM-MSCs into osteoblasts. Previous studies reported that, in breast cancer cells, *PRSS23* was co-expressed with estrogen receptor  $\alpha$  (ER $\alpha$ ), and *PRSS23* knockdown may suppress estrogen-driven cell proliferation of breast cancer cells [26]. Since estrogens were highly significant for bone metabolism and maintaining bone mineral density (BMD) [27], we speculated that *PRSS23* may regulate bone metabolism through affecting ER $\alpha$  gene expression. Additionally, *PRSS23* have been reported to interact with TGF $\beta$  signaling pathways [28], and TGF $\beta$  signaling pathway was significant for bone metabolism [29]. Therefore, we speculated that *PRSS23* may also regulate bone metabolism through mediating the TGF $\beta$  signaling pathway. *MXRA8* was highly expressed in both BM-MSCs and osteoblasts (Figure 2D), suggesting that it may play a critical role in maintaining the activity and function of BM-MSCs and osteoblasts. Recent studies showed that *MXRA8* was a lipid metabolism-related gene [30] and also related to the proliferation of growth plate chondrocytes [31]. Interestingly, *MXRA8* is a cell adhesion molecule, as an entry mediator for arthritogenic alphaviruses [32], and arthritogenic alphaviruses would cause chronic musculoskeletal disease [33]. Taken together, *PRSS23* and *MXRA8* were likely related to bone metabolism in humans.

In the monocytes, we found the *IL1B*<sup>+</sup> monocytes (M1) could regulate bone metabolism, and this subtype of monocytes have been reported as a key potential

**Table 1. Enrichment analysis of subtypes in monocytes, T cells and B cells.**

| Subtype | ID         | Description                                       | GeneRatio | p.adjust | Gene symbol                                                                                                                                                                                                           |
|---------|------------|---------------------------------------------------|-----------|----------|-----------------------------------------------------------------------------------------------------------------------------------------------------------------------------------------------------------------------|
| M1      | GO:0001503 | ossification                                      | 19/399    | 0.011    | VCAN, ATP2B1, PTGS2, FGR, CTNNB1, TGFB1, H3F3A, HIF1A, AREG, TCIRG1, CEBPB, DDX5, DDX21, TPM4, SNAI1, IL6R, JUNB, CLEC5A, IL6                                                                                         |
|         | GO:0001649 | osteoblast differentiation                        | 14/399    | 0.006    | VCAN, CTNNB1, H3F3A, AREG, TCIRG1, CEBPB, DDX5, DDX21, TPM4, SNAI1, IL6R, JUNB, CLEC5A, IL6                                                                                                                           |
|         | GO:0030316 | osteoclast differentiation                        | 10/399    | 0.001    | LILRB3, FCER1G, CTNNB1, MAFB, TGFB1, OSCAR, TCIRG1, CEBPB, ANXA2, JUNB                                                                                                                                                |
|         | GO:0045453 | bone resorption                                   | 5/399     | 0.045    | CTNNB1, ADAM8, TNFAIP3, TCIRG1, IL6                                                                                                                                                                                   |
|         | GO:0046849 | bone remodeling                                   | 6/399     | 0.048    | CTNNB1, TGFB1, ADAM8, TNFAIP3, TCIRG1, IL6                                                                                                                                                                            |
|         | hsa04380   | osteoclast differentiation                        | 19/238    | 0.000    | IL1B, NCF2, LILRB2, LILRA5, LILRB3, FOSL2, NFKBIA, SOCS3, TGFB1, IFNGR2, LCP2, OSCAR, NFKB2, NCF1, NFKB1, IFNGR1, IL1A, FYN, JUNB                                                                                     |
| T1      | GO:0030316 | osteoclast differentiation                        | 4/62      | 0.007    | GPR183, JUNB, FOS, FOXP1                                                                                                                                                                                              |
|         | GO:0030316 | osteoclast differentiation                        | 6/191     | 0.008    | PIK3R1, CD81, CCL3, IFNG, GNAS, TGFB1                                                                                                                                                                                 |
| T2      |            | regulation of osteoclast differentiation          |           |          |                                                                                                                                                                                                                       |
|         | GO:0045670 | osteoclast differentiation                        | 4/191     | 0.046    | PIK3R1, CCL3, IFNG, GNAS                                                                                                                                                                                              |
|         | GO:0030316 | osteoclast differentiation                        | 4/109     | 0.037    | IL23R, CA2, GPR183, FOS                                                                                                                                                                                               |
| T4      |            | positive regulation of osteoclast differentiation |           |          |                                                                                                                                                                                                                       |
|         | GO:0045672 | osteoclast differentiation                        | 3/109     | 0.010    | IL23R, CA2, FOS                                                                                                                                                                                                       |
|         | GO:0030316 | osteoclast differentiation                        | 6/308     | 0.043    | TYROBP, FCER1G, TGFB1, CCL3, CD81, CEBPB                                                                                                                                                                              |
| T5      |            | positive regulation of ossification               |           |          |                                                                                                                                                                                                                       |
|         | GO:0045778 | osteoclast differentiation                        | 6/308     | 0.043    | TGFB1, IFITM1, CLIC1, ADRB2, ZBTB16, CEBPB                                                                                                                                                                            |
| T6      | GO:0030316 | osteoclast differentiation                        | 7/246     | 0.007    | LTF, FCER1G, TYROBP, LILRB3, SNX10, MAPK14, FOS                                                                                                                                                                       |
| B5      | GO:0001649 | osteoblast differentiation                        | 32/1647   | 0.042    | LEF1, CDK6, H3F3A, HNRNPC, SMAD1, CBF, ID2, ID3, HNRNPU, ATP5F1B, RBM3, FBXO5, SYNCRIP, MEF2D, GNAS, SNRNP200, CLTC, ALYREF, REST, HDAC7, DHX9, DDX5, MEF2C, CLIC1, H3F3B, CTNNB1, ADAR, TPM4, RPS15, FBL, LIMD1, PHB |
| B4      | hsa04380   | osteoclast differentiation                        | 13/383    | 0.040    | JUNB, JUND, NFKB2, NFATC1, GRB2, TGFB1, FOS, FOSB, CYLD, PPP3CA, SOCS3, NCF1, NFKBIA                                                                                                                                  |

Monocytes: M1-M3; T cells: T1-T7; B cells: B1-B5.

mediator of the pathogenesis of rheumatoid arthritis [34]. Besides, the *IL1B*<sup>+</sup> monocytes (M1) contain the *TRAP*<sup>+</sup>*CTSK*<sup>+</sup> osteoclast precursor (Figure 3J). Among the T cells, we found the majority of CD8 T cells in bone tissue express *GZMK*, which is similar to the results in synovial tissue [34]. GO enrichment analysis suggested that *GZMK*<sup>+</sup>*CCR6*<sup>+</sup>CD8 T cells (T4) could promote osteoclastogenesis and enhance bone resorption. *CCL20* was highly expressed in

*GZMK*<sup>+</sup>*CCR6*<sup>+</sup>CD8 T cells (T4) (Figure 3K), and *CCL20* can enhance osteoclastogenesis and induce osteoclast differentiation [35, 36]. In contrast, another subpopulation of CD8 T cells, *GZMK*<sup>+</sup>*CXCL8*<sup>+</sup> T cells (T6), specifically express high levels of *LTF* (Figure 3K), which can inhibit the bone resorption mediated by osteoclasts [37]. Therefore, the previous notion that CD8 T cells are suppressive to bone resorption should be re-evaluated at single-cell level [38–40]. In addition,

GO enrichment analysis suggested that the pre-B cells (only B5) may also regulate the differentiation of osteoblasts. Therefore, future studies are needed to further explore the functional roles of *GZMK*<sup>+</sup>*CCR6*<sup>+</sup>*CD8* T cells (T4) and pre-B cells (only B5) on bone metabolism in the context of their *in vivo* functional importance in bone tissues.

To explore inter-cellular interaction in human femoral head tissue cells, we constructed the inter-cellular communication networks in femoral head based on known ligand-receptor interactions. In the network, EPCs closely communicated with osteoblastic lineage cells via "COL2A1-ITGB1" interaction. Since COL2A1 is a known chondrogenic marker [41], we suspected that

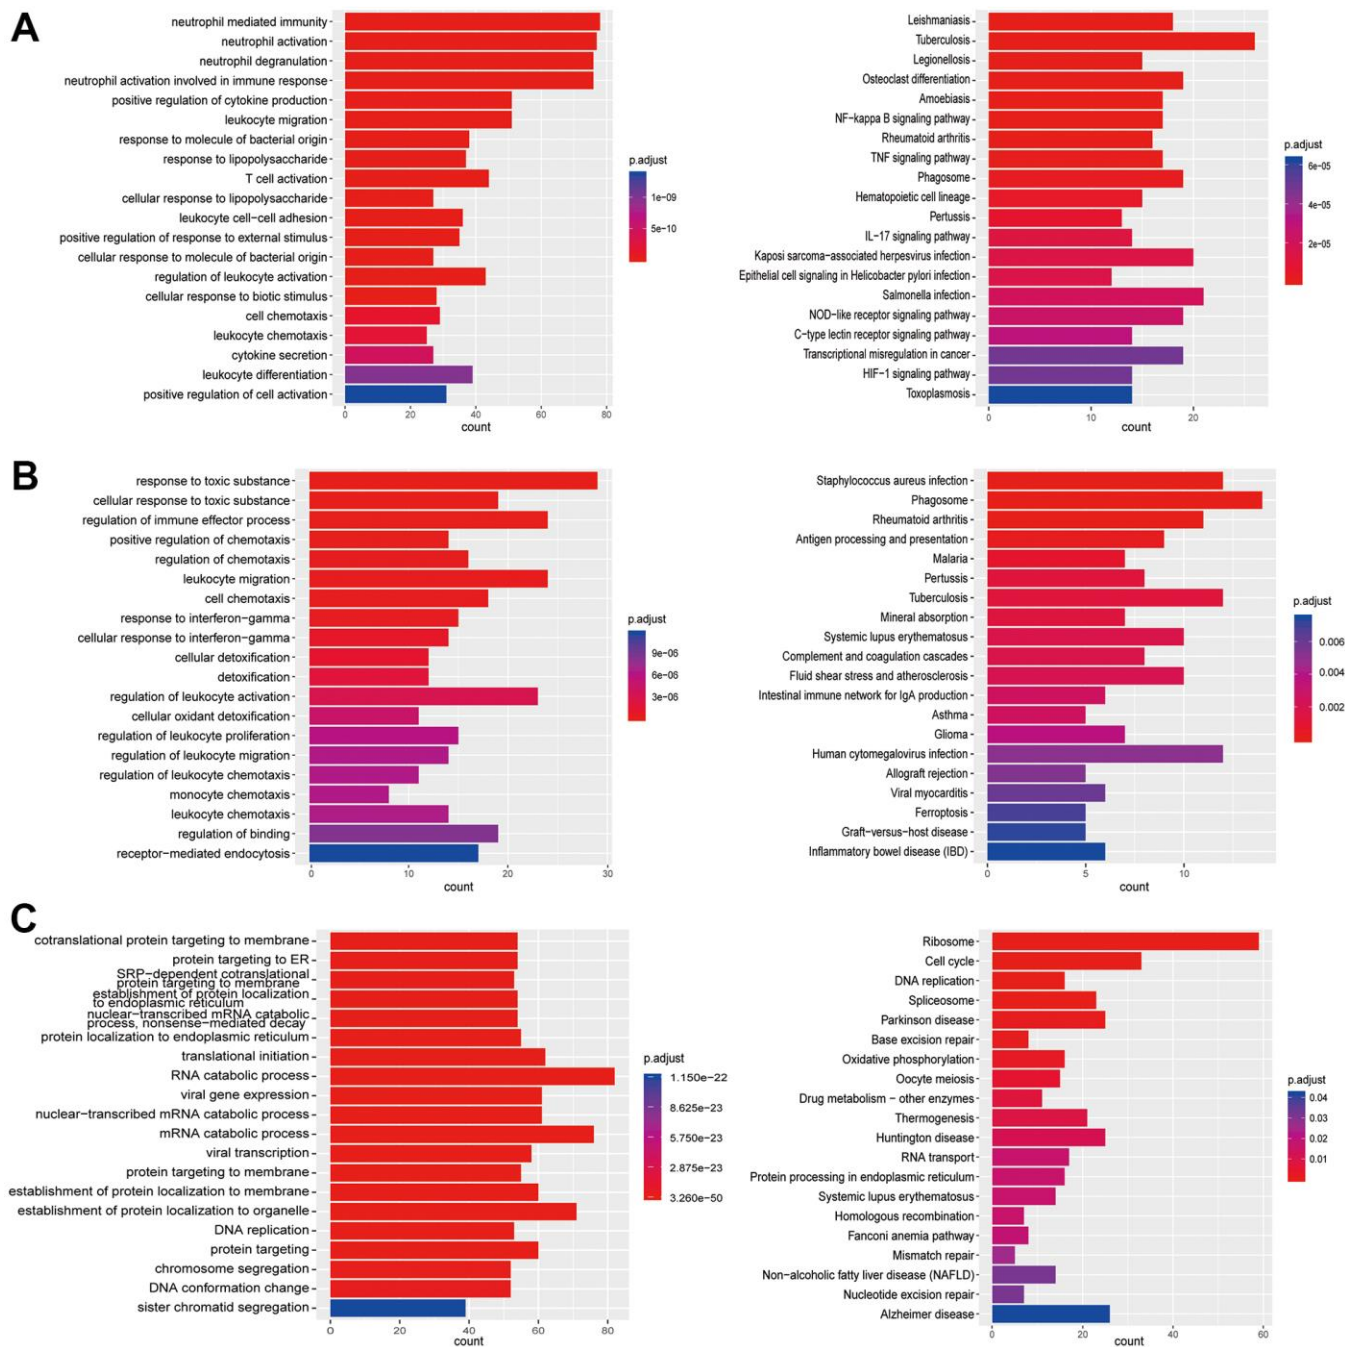

**Figure 4. Enrichment analysis of subtypes in monocytes (M1-M3).** (A) GO (left) and KEGG (right) enrichment analysis of DEGs in M1. (B) GO (left) and KEGG (right) enrichment analysis of DEGs in M2. (C) GO (left) and KEGG (right) enrichment analysis of DEGs in M3.



EPCs may regulate chondrogenesis of osteoblastic lineage cells through "COL2A1-ITGB1" interaction. For novel bone metabolism-related genes, *PRSS23* and *MXRA8*, we did not find any significant crosstalks in the cell-cell communication analysis, which is probably due to the very limited knowledge about the functions of these two genes.

Despite interesting and novel findings in this initial comprehensive characterization of cells and their

interactions *in vivo* in human femoral head at single cell level, our study may have some limitations. First, due to limited amount of data (only 691 osteoblastic lineage cells detected in our dataset), we were unable to further dissect subpopulations of osteoblastic lineage cells. This is mainly because we performed scRNA-seq on the primary femoral head tissue cells without any purification/enrichment procedures specifically for osteoblastic lineage cells. Also, the samples of this study were from subjects with osteoporosis or

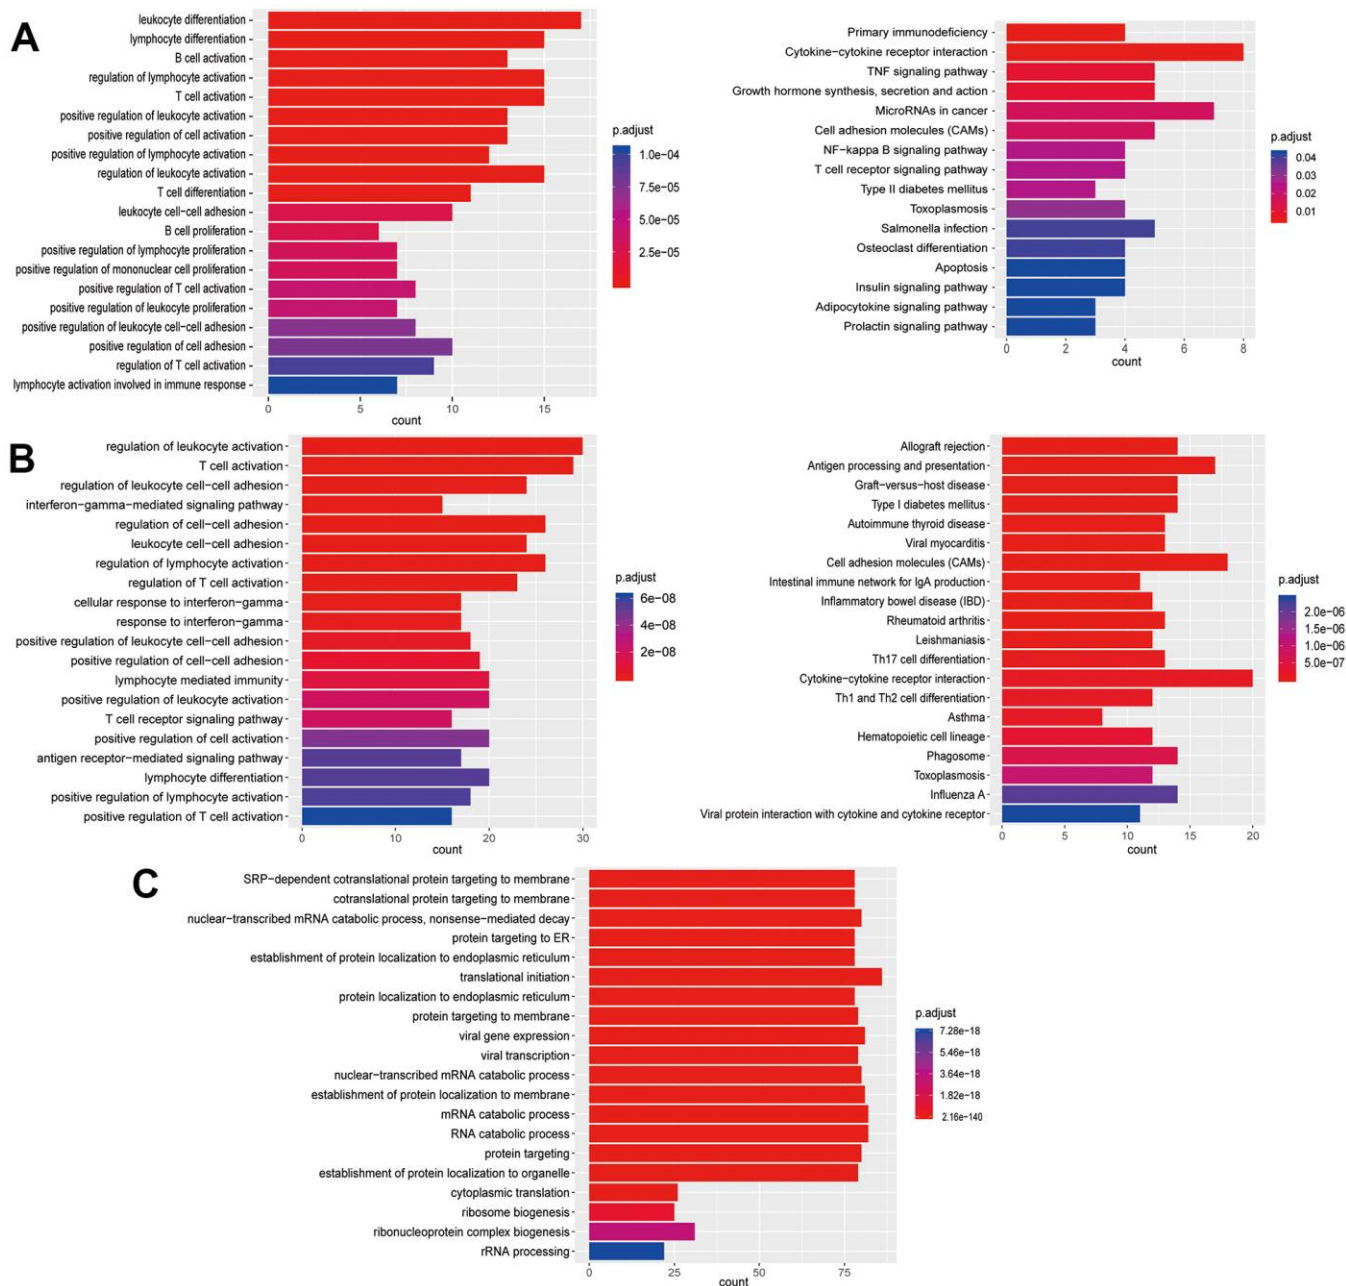

**Figure 5. Enrichment analysis of subtypes in T cells (T1-T3).** (A) GO (left) and KEGG (right) enrichment analysis of DEGs in T1. (B) GO (left) and KEGG (right) enrichment analysis of DEGs in T2. (C) GO enrichment analysis of DEGs in T3.

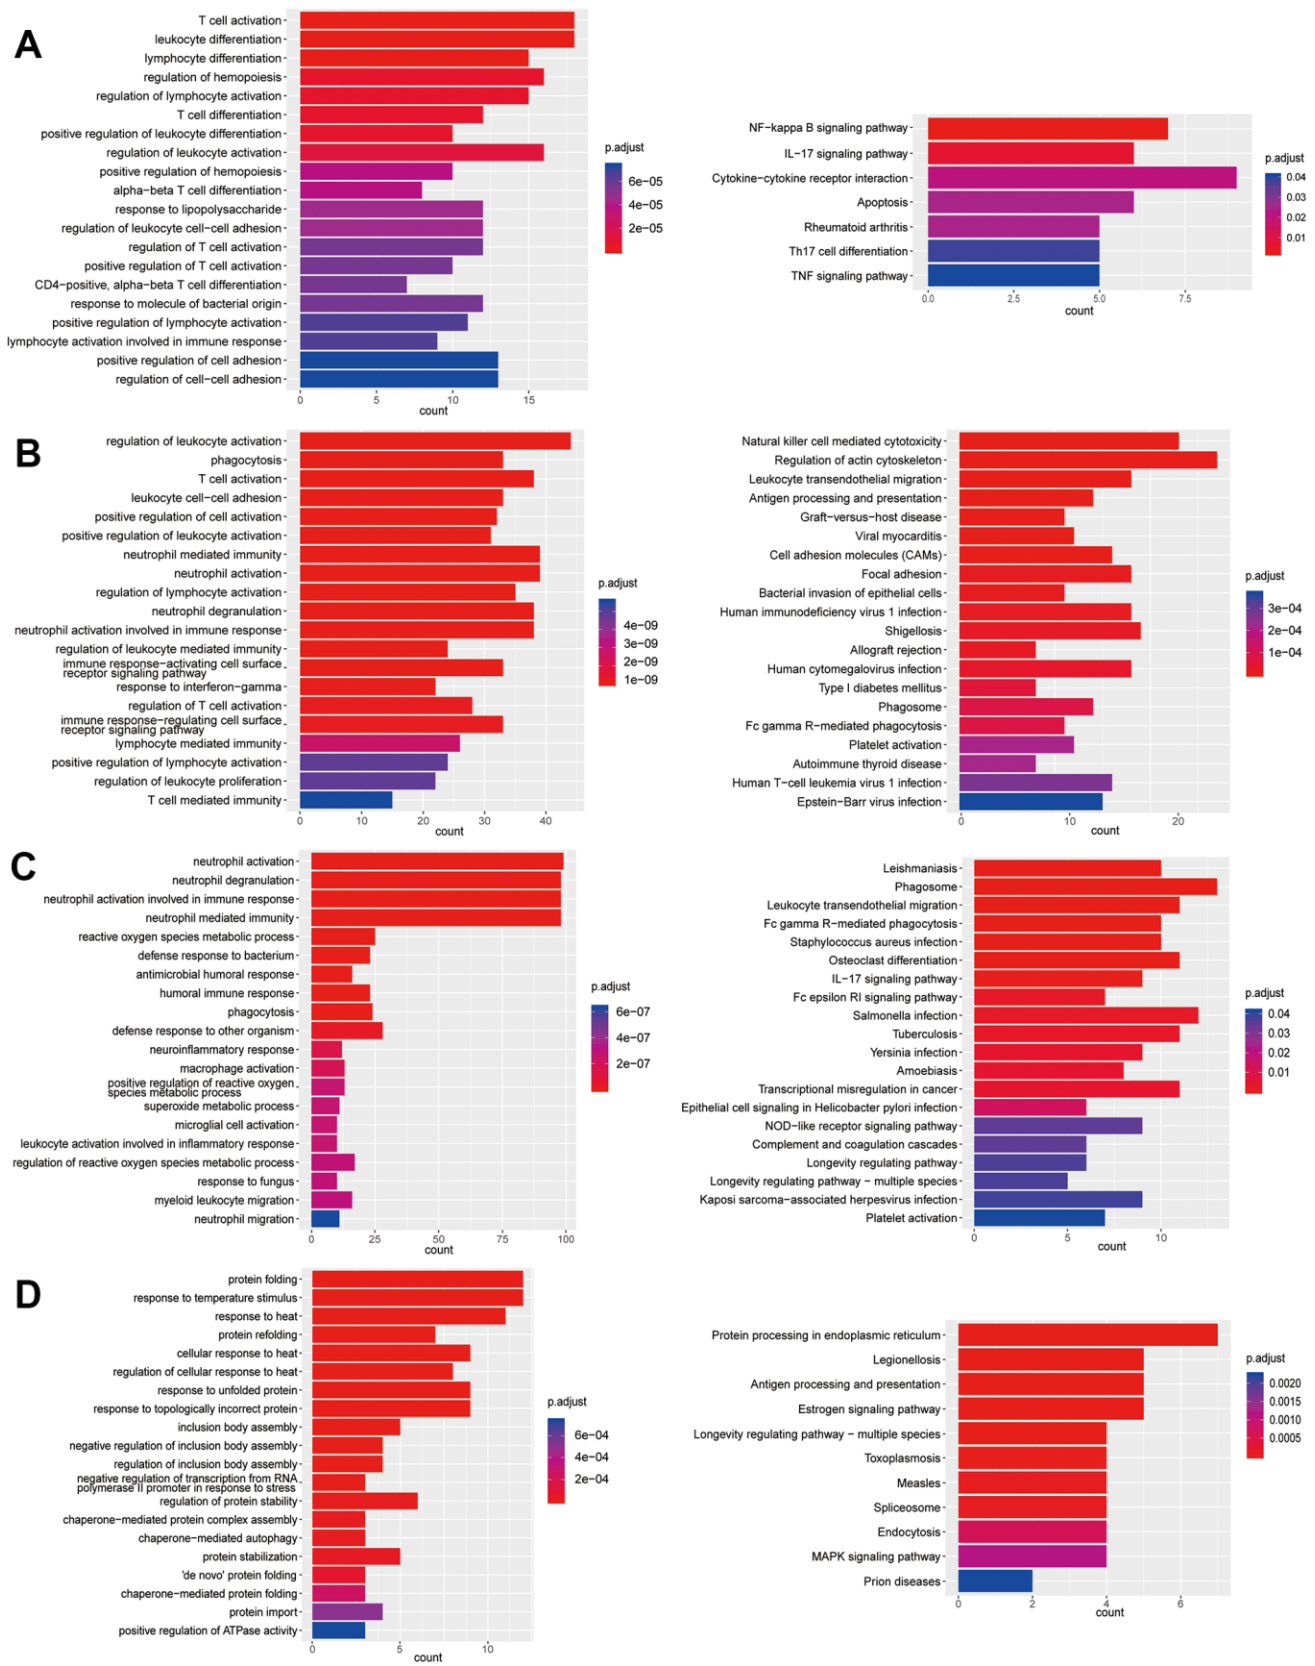

**Figure 6. Enrichment analysis of subtypes in T cells (T4-T7).** (A) GO (left) and KEGG (right) enrichment analysis of DEGs in T4. (B) GO (left) and KEGG (right) enrichment analysis of DEGs in T5. (C) GO (left) and KEGG (right) enrichment analysis of DEGs in T6. (D) GO (left) and KEGG (right) enrichment analysis of DEGs in T7.

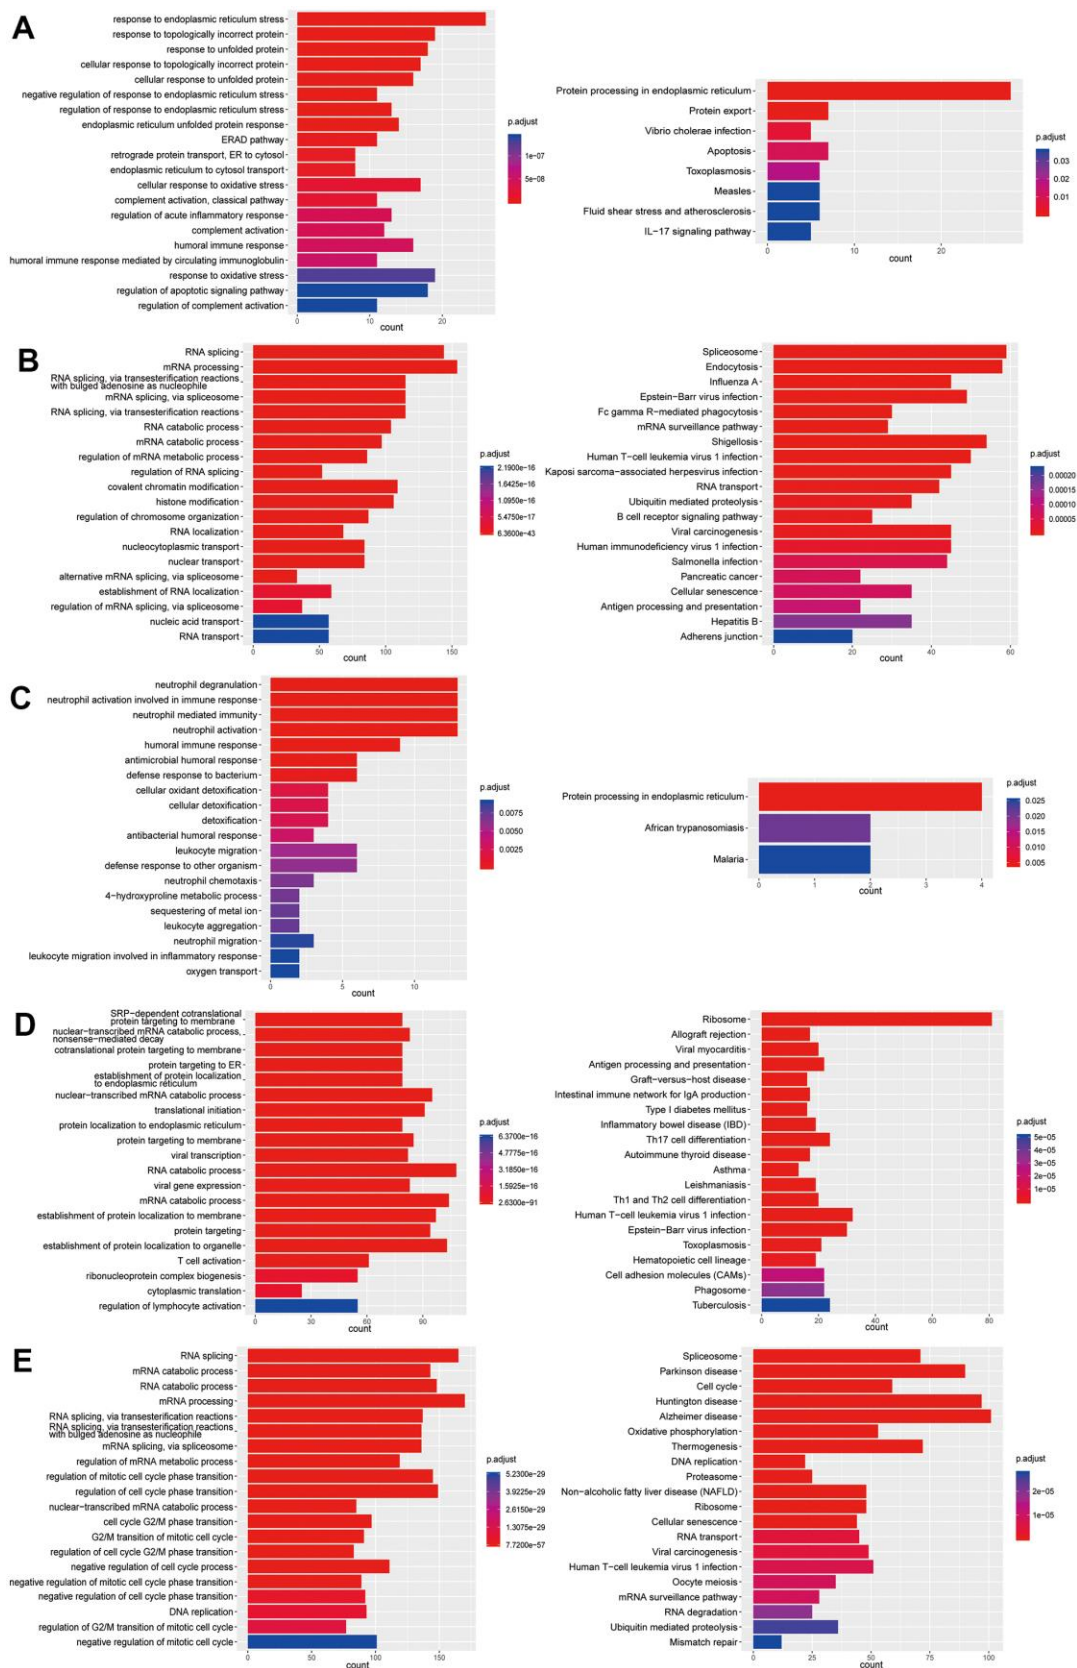

**Figure 7. Enrichment analysis of subtypes in B cells (B1-B5).** (A) GO (left) and KEGG (right) enrichment analysis of DEGs in B1. (B) GO (left) and KEGG (right) enrichment analysis of DEGs in B2. (C) GO (left) and KEGG (right) enrichment analysis of DEGs in B3. (D) GO (left) and KEGG (right) enrichment analysis of DEGs in B4. (E) GO (left) and KEGG (right) enrichment analysis of DEGs in B5.



In summary, our study characterized the cellular composition of the human femoral head tissue cells, and identified *PRSS23* and *MXRA8* as novel bone metabolism-related genes. The complex inter-cellular communication networks in human femoral head suggest that various types of cells are involved in the regulation of bone metabolism, and EPCs communicate with osteoblastic lineage cells closely via the "COL2A1-ITGB1" interaction pair. Our study provides a systematic dissection of human femoral head at the single-cell level, and shows the global single-cell profile of how different cells work together in human femoral head on the single-cell resolution, which is a unique resource for in-depth insights into bone metabolism.

In future studies, more subjects should be included to further dissect subpopulation of osteoblastic lineage cells, and to explore how different health states affect the bone metabolism and vice versa. Besides, by combining scRNA-seq with spatial transcriptomics [45] and scATAC-seq (a powerful tool to evaluate chromatin accessibility at the single-cell level) [46], we will aim to unveil the complicated crosstalk between bone tissue cells, and the gene regulatory network within/between them. In the meantime, deconvolution of the cellular heterogeneity of bone tissue cells *in vivo* in humans represents an important and necessary advancement step towards improving our understanding of bone physiological processes.

## MATERIALS AND METHODS

### Study subjects

The study was approved by the Medical Ethics Committee of Xiangya Hospital of Central South University and written informed consent was obtained from all participants. The study subjects consisted of four Chinese subjects of Han ethnicity (detailed information of the study subjects provided in Supplementary Table 1), who underwent hip replacement surgery at Xiangya Hospital of Central South University. All the subjects were screened with a detailed questionnaire, medical history, physical examination, and measured for bone mineral density (BMD) before surgery. Subjects were excluded from the study if they had chronic diseases that may affect bone metabolism, including but not limited to renal failure, liver failure, diabetes mellitus, hematologic diseases, malabsorption syndrome, disorders of the thyroid/parathyroid, malignant tumors, ankylosing spondylitis, hyperprolactinemia, oophorectomy, or previous pathological fractures [47]. The femur head was collected from the patient during hip replacement

surgery. The specimens were immediately stored at 4° C temporarily and transferred to the wet laboratory within 2 hours, where they were processed within 24 hours after delivery.

### BMD measurement

BMD (g/cm<sup>2</sup>) was measured by the dual energy x-ray absorptiometry (DXA) fan-beam bone densitometer (Hologic QDR 4500A, Hologic, Inc., Bedford, MA, USA) at the right hip (femoral neck and trochanter) and the lumbar spine (L1-L4). According to the World Health Organization (WHO) definition [48] and the BMD reference established for Chinese [49], subject with T-score ≤ -2.5 is clinically diagnosed as osteoporosis, while T-score between -2.5 and -1 as osteopenia, and T-score > -1.0 are considered healthy.

### Isolation of bone tissue cells

Bone tissue cells were extracted from the femoral head specimens based on widely used dissociation protocols with a few adjustments [50, 51]. First, femoral heads were washed three times with αMEM (Cat: SH30265.01, HyClone, USA) and dissected into small pieces of approximately 1-2 mm in diameter. Bone pieces (10 g wet weight) were placed into a 50 ml conical tube with 20 ml of 2 mg/ml collagenase type II (Cat: A004174-0001, Sangon Biotech, China) dissolved in αMEM with 100 U/ml Penicillin and 100µg/ml Streptomycin (Cat: 15140-122, Gibco, USA) and digested with gentle agitation for 25 minutes at 37° C. After that, the collagenase solution was aseptically removed and bone pieces were rinsed in 10 ml PBS for 3 times. Briefly, after five rounds of digestion, we combined the collagenase solutions from the last two rounds of digestion and filtered the solution through a 40 µm filter. Finally, we incubated the collected cells with red blood cell (RBC) lysis buffer (Cat: R1010, Solarbio, China) for 5 minutes and then washed it twice with PBS.

### scRNA-seq library preparation and sequencing

scRNA-seq libraries were prepared using Single Cell 3' Library Gel Bead Kit V3 following the manufacturer's guidelines (<https://support.10xgenomics.com/single-cell-gene-expression/library-prep/doc/user-guide-chromium-single-cell-3-reagent-kits-user-guide-v3-chemistry>). Single cell 3' Libraries contain the P5 and P7 primers used in Illumina bridge amplification PCR. The 10x Barcode and Read 1 (primer site for sequencing read 1) were added to the molecules during the GEM-RT incubation. The P5 primer, Read 2 (primer site for sequencing read 2),

Sample Index and P7 primer were added during library construction. The protocol was designed to support library construction from a wide range of cDNA amplification yields spanning from 2 ng to > 2 µg without modification. Finally, scRNA-seq libraries were sequenced on the Illumina Novaseq6000 platform with a sequencing depth of at least 100,000 reads per cell for a 150bp paired end (PE150) run.

### Pre-processing of scRNA-seq data

The FASTQ files were mapped to the human transcriptome (GRCh38/hg38) using Cell Ranger 3.0 (<https://support.10xgenomics.com/single-cell-gene-expression/software/pipelines/latest/what-is-cell-ranger>). To create Cell Ranger-compatible reference genomes, the references were rebuilt according to instructions from 10x Genomics (<https://www.10xgenomics.com>), which performs alignment, filtering, barcode counting and UMI counting. Finally, the digital gene expression matrix was generated. For quality control (QC), we used the R (version 3.6.1, <https://www.r-project.org/>) and

*Seurat* R package (version 3.1, <https://satijalab.org/seurat/>) [52, 53] to calculate the distribution of genes detected per cell and remove the cells in the top or the bottom 2% quantile. We also excluded cells in which more than 10% of the transcripts were attributed to mitochondrial genes.

### Dimension reduction and cluster identification

To visualize and cluster the data, we selected top 2,000 most variable genes for principal-component analysis (PCA), and then, we used the first 20 principal-components (PCs) for visualization by t-Distributed Stochastic Neighbor Embedding (t-SNE) [54]. Next, we performed an unbiased graph-based method for clustering analysis using the first 20 PCs [55]. To identify differentially expressed genes (DEGs) between clusters, Wilcoxon rank-sum test was used to identify genes showing significantly higher levels of expression (false discovery rate (FDR) < 0.05) in a specific cluster compared to the other clusters.

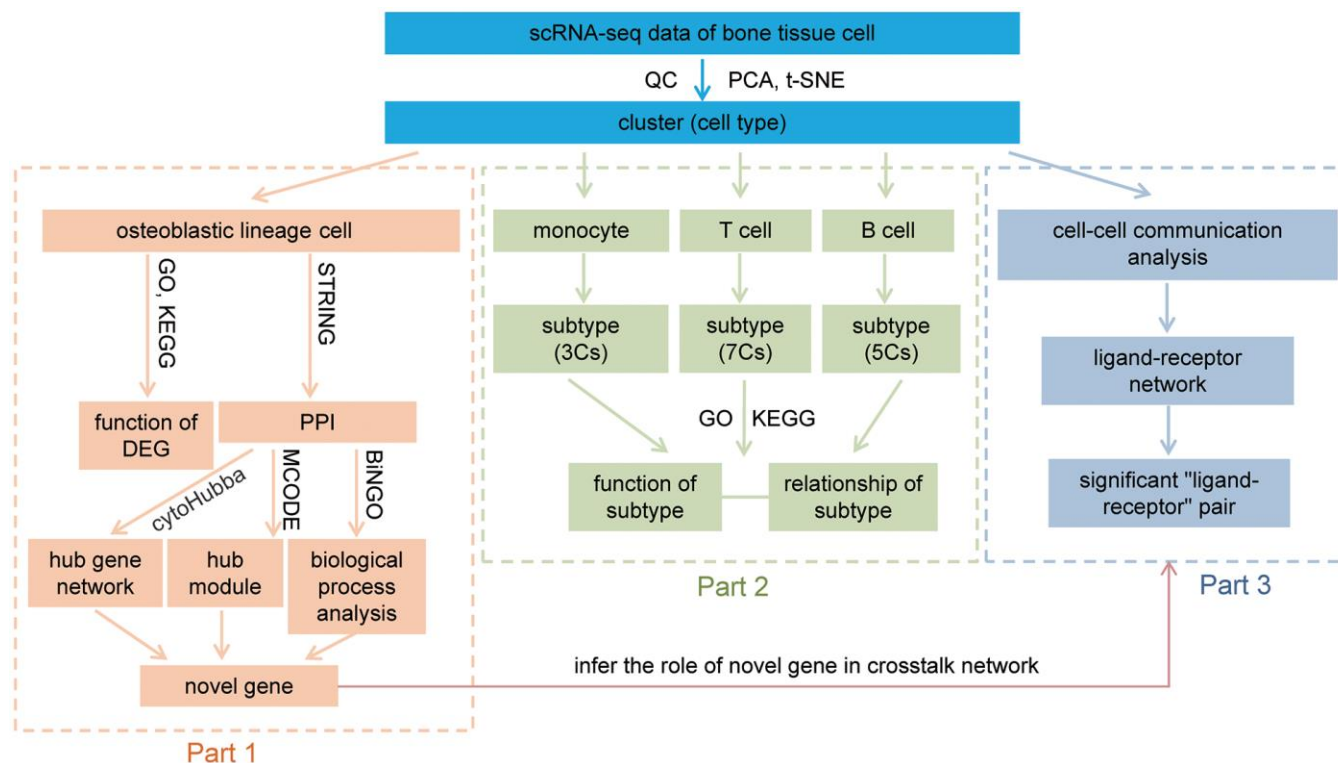

**Figure 9. Workflow of this study.** After QC, dimension reduction, and clustering of the data, we identify nine cell types in our data. The downstream analysis was divided into three parts. Part 1, analysis of osteoblastic lineage cells, functional analyses of osteoblastic lineage cells and identify novel bone metabolism-related gene. Part 2, revealing distinct subtypes in monocytes, T cells and B cells, and discussion their relationship with bone metabolism. Part 3, constructing the communication networks of human femoral head tissue cells, and inferring the role of novel metabolism-related gene in crosstalk network. QC: quality control; PCA: principal-component analysis; t-SNE: t-Distributed Stochastic Neighbor Embedding; GO: gene ontology enrichment analysis; KEGG: Kyoto Encyclopedia of Genes and Genomes enrichment analysis; DEG: differentially expressed gene; PPI: protein-protein interaction; MCODE: Molecular Complex Detection; Cs: clusters.

## Pathway enrichment analysis

To investigate the biological processes and signal pathways associated with cell type, we performed gene ontology (GO) and Kyoto Encyclopedia of Genes and Genomes (KEGG) enrichment analyses for the genes that were identified as important DEGs for clusters (adjusted  $p$  value  $< 0.05$ ), by using the *clusterProfiler* R package [56].

## Protein-protein interaction (PPI) network, hub genes and module analysis

To identify the most significant gene among the DEGs in the context of functioning in gene networks, a PPI network of DEGs (selected with average  $\log(\text{Fold change}) > 1.0$ , adjusted  $p$  value  $< 0.05$ ) was constructed using the Search Tool for the Retrieval of Interacting Genes (STRING, <http://string.embl.de/>) [57]. The Cytoscape software (version 3.7.2) was applied to visualize and analyze the molecular interaction networks [58]. The hub genes of the PPI network were identified by cytoHubba (Cytoscape) [59]. The modules of the PPI network were selected by Molecular Complex Detection (MCODE) (Cytoscape) [60]. The biological analyses of hub genes were constructed using BiNGO (Cytoscape) [61].

## Cell-cell communication analysis

To explore the potential interactions between cells in human femoral head, we used *iTALK* [62] to perform cell-cell communication analysis, which is an R toolkit for visualizing ligand-receptor-mediated inter-cellular interaction in scRNA-seq data. The product of average receptor expression and average ligand expression was calculated in each cell cluster to score the enriched receptor-ligand interactions.

## Public datasets

We recently generated scRNA-seq datasets of human BM-MSCs and human osteoblasts [24, 25], which can be accessed from GEO database (<https://www.ncbi.nlm.nih.gov/geo/>) [63] under the accession numbers of GSE147287 and GSE147390, respectively. In this study, we processed these datasets using the same parameters as described in our previous studies [24, 25]. The gene expression profile of osteogenic differentiation by BM-MSCs *in vitro* was obtained from the GEO database with accession numbers GSE37558 [64]. And the data were  $\log_2$  transformed and normalized using the quantile-normalization approach.

The data analyses of this study were divided into three parts, and illustrated in Figure 9.

## Ethics approval

The study was approved by the Medical Ethics Committee of Xiangya Hospital of Central South University, and the IRB approval number is No. 201912315.

## Consent to participate

Written informed consent was obtained from all participants.

## Consent for publication

All authors gave their consent for publication.

## Availability of data and material

The scRNA-seq data of human femoral head tissue cells from four human samples is available in the GEO database with accession numbers GSE169396. The scRNA-seq data of human BM-MSCs and human osteoblasts are available in the GEO database with accession numbers GSE147287 and GSE108891. The data of osteogenic differentiation by BM-MSCs *in vitro* was obtained from the GEO database with accession numbers GSE37558.

## AUTHOR CONTRIBUTIONS

Hong-Wen Deng, Hui Shen, Hong-Mei Xiao and Li-Jun Tan conceived, designed, initiated, directed and supervised the whole project. Xiang Qiu as the first author conducted data analysis and drafted the manuscript. Junxiao Yang, Liang Cheng, Xiaohua Li, and Huixi Zhang collected the human sample and corresponding clinical information. Xiang Qiu and Ying Liu performed the experiments. Hong-Wen Deng, Hui Shen, Zun Wang and Wanqiang Lv revised the manuscript. All authors participated in the discussions of the project and reviewed and/or revised the manuscript. All authors approved the final version of the manuscript.

## CONFLICTS OF INTEREST

The authors declare that they have no conflicts of interest.

## FUNDING

This research was benefited by grants from the National Institutes of Health (R01AR069055, U19AG055373, P20GM109036, R01AG061917), National Natural Science Foundation of China (Grant No. 81902277), National Key R&D Program of China (Grant No.

2017YFC1001100), Natural Science Foundation of Hunan Province (S2019JJQNJJ2093), Changsha Science and Technology project (kq1907153), Central South University (Grant Nos. 164990007, 2018zzts886), and Xiangya Clinical Big Data Project (xyyydsj9).

## REFERENCES

1. Datta HK, Ng WF, Walker JA, Tuck SP, Varanasi SS. The cell biology of bone metabolism. *J Clin Pathol*. 2008; 61:577–87.  
<https://doi.org/10.1136/jcp.2007.048868>  
PMID:18441154
2. Karner CM, Long F. Wnt signaling and cellular metabolism in osteoblasts. *Cell Mol Life Sci*. 2017; 74:1649–57.  
<https://doi.org/10.1007/s00018-016-2425-5>  
PMID:27888287
3. Suda T, Takahashi N, Udagawa N, Jimi E, Gillespie MT, Martin TJ. Modulation of osteoclast differentiation and function by the new members of the tumor necrosis factor receptor and ligand families. *Endocr Rev*. 1999; 20:345–57.  
<https://doi.org/10.1210/edrv.20.3.0367>  
PMID:10368775
4. Sims NA, Walsh NC. Intercellular cross-talk among bone cells: new factors and pathways. *Curr Osteoporos Rep*. 2012; 10:109–17.  
<https://doi.org/10.1007/s11914-012-0096-1>  
PMID:22427140
5. Pirraco RP, Reis RL, Marques AP. Effect of monocytes/macrophages on the early osteogenic differentiation of hBMSCs. *J Tissue Eng Regen Med*. 2013; 7:392–400.  
<https://doi.org/10.1002/term.535>  
PMID:22392849
6. Li Y, Toraldo G, Li A, Yang X, Zhang H, Qian WP, Weitzmann MN. B cells and T cells are critical for the preservation of bone homeostasis and attainment of peak bone mass *in vivo*. *Blood*. 2007; 109:3839–48.  
<https://doi.org/10.1182/blood-2006-07-037994>  
PMID:17202317
7. Colucci S, Brunetti G, Rizzi R, Zonno A, Mori G, Colaianni G, Del Prete D, Faccio R, Liso A, Capalbo S, Liso V, Zallone A, Grano M. T cells support osteoclastogenesis in an *in vitro* model derived from human multiple myeloma bone disease: the role of the OPG/TRAIL interaction. *Blood*. 2004; 104:3722–30.  
<https://doi.org/10.1182/blood-2004-02-0474>  
PMID:15308561
8. Manabe N, Kawaguchi H, Chikuda H, Miyaura C, Inada M, Nagai R, Nabeshima Y, Nakamura K, Sinclair AM, Scheuermann RH, Kuro-o M. Connection between B lymphocyte and osteoclast differentiation pathways. *J Immunol*. 2001; 167:2625–31.  
<https://doi.org/10.4049/jimmunol.167.5.2625>  
PMID:11509604
9. Bai H, Chen T, Lu Q, Zhu W, Zhang J. Gene expression profiling of the bone trabecula in patients with osteonecrosis of the femoral head by RNA sequencing. *J Biochem*. 2019; 166:475–84.  
<https://doi.org/10.1093/jb/mvz060> PMID:31518413
10. Ho XD, Phung P, Le VQ, Nguyen VH, Reimann E, Prans E, Köks G, Maasalu K, Le NT, Trinh LH, Nguyen HG, Märtson A, Köks S. Whole transcriptome analysis identifies differentially regulated networks between osteosarcoma and normal bone samples. *Exp Biol Med* (Maywood). 2017; 242:1802–11.  
<https://doi.org/10.1177/1535370217736512>  
PMID:29050494
11. Papalexli E, Satija R. Single-cell RNA sequencing to explore immune cell heterogeneity. *Nat Rev Immunol*. 2018; 18:35–45.  
<https://doi.org/10.1038/nri.2017.76> PMID:28787399
12. Schelker M, Feau S, Du J, Ranu N, Klipp E, MacBeath G, Schoeberl B, Raue A. Estimation of immune cell content in tumour tissue using single-cell RNA-seq data. *Nat Commun*. 2017; 8:2032.  
<https://doi.org/10.1038/s41467-017-02289-3>  
PMID:29230012
13. Stubbington MJ, Rozenblatt-Rosen O, Regev A, Teichmann SA. Single-cell transcriptomics to explore the immune system in health and disease. *Science*. 2017; 358:58–63.  
<https://doi.org/10.1126/science.aan6828>  
PMID:28983043
14. Wei C, Jenks S, Sanz I. Polychromatic flow cytometry in evaluating rheumatic disease patients. *Arthritis Res Ther*. 2015; 17:46.  
<https://doi.org/10.1186/s13075-015-0561-1>  
PMID:25880288
15. Hwang B, Lee JH, Bang D. Single-cell RNA sequencing technologies and bioinformatics pipelines. *Exp Mol Med*. 2018; 50:1–14.  
<https://doi.org/10.1038/s12276-018-0071-8>  
PMID:30089861
16. Freeman BT, Jung JP, Ogle BM. Single-Cell RNA-Seq of Bone Marrow-Derived Mesenchymal Stem Cells Reveals Unique Profiles of Lineage Priming. *PLoS One*. 2015; 10:e0136199.  
<https://doi.org/10.1371/journal.pone.0136199>  
PMID:26352588
17. Barrett AN, Fong CY, Subramanian A, Liu W, Feng Y, Choolani M, Biswas A, Rajapakse JC, Bongso A. Human Wharton's Jelly Mesenchymal Stem Cells Show Unique



- Gene Expression Compared with Bone Marrow Mesenchymal Stem Cells Using Single-Cell RNA-Sequencing. *Stem Cells Dev.* 2019; 28:196–211.  
<https://doi.org/10.1089/scd.2018.0132>  
PMID:30484393
18. Todd DJ, McHeyzer-Williams LJ, Kowal C, Lee AH, Volpe BT, Diamond B, McHeyzer-Williams MG, Glimcher LH. XBP1 governs late events in plasma cell differentiation and is not required for antigen-specific memory B cell development. *J Exp Med.* 2009; 206:2151–59.  
<https://doi.org/10.1084/jem.20090738>  
PMID:19752183
  19. Fujio M, Yamamoto A, Ando Y, Shohara R, Kinoshita K, Kaneko T, Hibi H, Ueda M. Stromal cell-derived factor-1 enhances distraction osteogenesis-mediated skeletal tissue regeneration through the recruitment of endothelial precursors. *Bone.* 2011; 49:693–700.  
<https://doi.org/10.1016/j.bone.2011.06.024>  
PMID:21741502
  20. Hosogane N, Huang Z, Rawlins BA, Liu X, Boachie-Adjei O, Boskey AL, Zhu W. Stromal derived factor-1 regulates bone morphogenetic protein 2-induced osteogenic differentiation of primary mesenchymal stem cells. *Int J Biochem Cell Biol.* 2010; 42:1132–41.  
<https://doi.org/10.1016/j.biocel.2010.03.020>  
PMID:20362069
  21. Qin HJ, Xu T, Wu HT, Yao ZL, Hou YL, Xie YH, Su JW, Cheng CY, Yang KF, Zhang XR, Chai Y, Yu B, Cui Z. SDF-1/CXCR4 axis coordinates crosstalk between subchondral bone and articular cartilage in osteoarthritis pathogenesis. *Bone.* 2019; 125:140–50.  
<https://doi.org/10.1016/j.bone.2019.05.010>  
PMID:31108241
  22. Raut N, Wicks SM, Lawal TO, Mahady GB. Epigenetic regulation of bone remodeling by natural compounds. *Pharmacol Res.* 2019; 147:104350.  
<https://doi.org/10.1016/j.phrs.2019.104350>  
PMID:31315065
  23. Neumann E, Riepl B, Knedla A, Lefèvre S, Tarner IH, Grifka J, Steinmeyer J, Schölerich J, Gay S, Müller-Ladner U. Cell culture and passaging alters gene expression pattern and proliferation rate in rheumatoid arthritis synovial fibroblasts. *Arthritis Res Ther.* 2010; 12:R83.  
<https://doi.org/10.1186/ar3010>  
PMID:20462438
  24. Wang Z, Li X, Yang J, Gong Y, Zhang H, Qiu X, Liu Y, Zhou C, Chen Y, Greenbaum J, Cheng L, Hu Y, Xie J, et al. Single-cell RNA sequencing deconvolutes the *in vivo* heterogeneity of human bone marrow-derived mesenchymal stem cells. *bioRxiv.* 2020. [Epub ahead of print].  
<https://doi.org/10.1101/2020.04.06.027904>
  25. Gong Y, Yang J, Li X, Zhou C, Chen Y, Wang Z, Qiu X, Liu Y, Zhang H, Greenbaum J, Cheng L, Hu Y, Xie J, et al. A systematic dissection of human primary osteoblasts *in vivo* at single-cell resolution. *bioRxiv.* 2020. [Epub ahead of print].  
<https://doi.org/10.1101/2020.05.12.091975>
  26. Chan HS, Chang SJ, Wang TY, Ko HJ, Lin YC, Lin KT, Chang KM, Chuang YJ. Serine protease PRSS23 is upregulated by estrogen receptor  $\alpha$  and associated with proliferation of breast cancer cells. *PLoS One.* 2012; 7:e30397.  
<https://doi.org/10.1371/journal.pone.0030397>  
PMID:22291950
  27. Khalid AB, Krum SA. Estrogen receptors alpha and beta in bone. *Bone.* 2016; 87:130–35.  
<https://doi.org/10.1016/j.bone.2016.03.016>  
PMID:27072516
  28. Chen IH, Wang HH, Hsieh YS, Huang WC, Yeh HI, Chuang YJ. PRSS23 is essential for the Snail-dependent endothelial-to-mesenchymal transition during valvulogenesis in zebrafish. *Cardiovasc Res.* 2013; 97:443–53.  
<https://doi.org/10.1093/cvr/cvs355> PMID:23213106
  29. Crane JL, Cao X. Bone marrow mesenchymal stem cells and TGF- $\beta$  signaling in bone remodeling. *J Clin Invest.* 2014; 124:466–72.  
<https://doi.org/10.1172/JCI70050> PMID:24487640
  30. Bazile J, Jaffrezic F, Dehais P, Reichstadt M, Klopp C, Laloe D, Bonnet M. Molecular signatures of muscle growth and composition deciphered by the meta-analysis of age-related public transcriptomics data. *Physiol Genomics.* 2020; 52:322–32.  
<https://doi.org/10.1152/physiolgenomics.00020.2020>  
PMID:32657225
  31. Emrani H, Masoudi AA, Vaez Torshizi R, Ehsani A. Genome-wide association study of shank length and diameter at different developmental stages in chicken F2 resource population. *Anim Genet.* 2020; 51:722–30.  
<https://doi.org/10.1111/age.12981>  
PMID:32662094
  32. Zhang R, Kim AS, Fox JM, Nair S, Basore K, Klimstra WB, Rimkunas R, Fong RH, Lin H, Poddar S, Crowe JE Jr, Doranz BJ, Fremont DH, Diamond MS. Mxra8 is a receptor for multiple arthritogenic alphaviruses. *Nature.* 2018; 557:570–74.  
<https://doi.org/10.1038/s41586-018-0121-3>  
PMID:29769725
  33. Weaver SC, Charlier C, Vasilakis N, Lecuit M. Zika, Chikungunya, and Other Emerging Vector-Borne Viral Diseases. *Annu Rev Med.* 2018; 69:395–408.  
<https://doi.org/10.1146/annurev-med-050715-105122>  
PMID:28846489

34. Zhang F, Wei K, Slowikowski K, Fonseka CY, Rao DA, Kelly S, Goodman SM, Tabechian D, Hughes LB, Salomon-Escoto K, Watts GF, Jonsson AH, Rangel-Moreno J, et al, and Accelerating Medicines Partnership Rheumatoid Arthritis and Systemic Lupus Erythematosus (AMP RA/SLE) Consortium. Defining inflammatory cell states in rheumatoid arthritis joint synovial tissues by integrating single-cell transcriptomics and mass cytometry. *Nat Immunol*. 2019; 20:928–42. <https://doi.org/10.1038/s41590-019-0378-1> PMID:31061532
35. Lisignoli G, Piacentini A, Cristino S, Grassi F, Cavallo C, Cattini L, Tonnarelli B, Manferdini C, Facchini A. CCL20 chemokine induces both osteoblast proliferation and osteoclast differentiation: Increased levels of CCL20 are expressed in subchondral bone tissue of rheumatoid arthritis patients. *J Cell Physiol*. 2007; 210:798–806. <https://doi.org/10.1002/jcp.20905> PMID:17133360
36. Pathak JL, Bakker AD, Verschueren P, Lems WF, Luyten FP, Klein-Nulend J, Bravenboer N. CXCL8 and CCL20 Enhance Osteoclastogenesis via Modulation of Cytokine Production by Human Primary Osteoblasts. *PLoS One*. 2015; 10:e0131041. <https://doi.org/10.1371/journal.pone.0131041> PMID:26103626
37. Icriverzi M, Dinca V, Moisei M, Evans RW, Trif M, Roseanu A. Lactoferrin in Bone Tissue Regeneration. *Curr Med Chem*. 2020; 27:838–53. <https://doi.org/10.2174/0929867326666190503121546> PMID:31258057
38. Choi Y, Woo KM, Ko SH, Lee YJ, Park SJ, Kim HM, Kwon BS. Osteoclastogenesis is enhanced by activated B cells but suppressed by activated CD8(+) T cells. *Eur J Immunol*. 2001; 31:2179–88. [https://doi.org/10.1002/1521-4141\(200107\)31:7<2179::aid-immu2179>3.0.co;2-x](https://doi.org/10.1002/1521-4141(200107)31:7<2179::aid-immu2179>3.0.co;2-x) PMID:11449372
39. Dar HY, Singh A, Shukla P, Anupam R, Mondal RK, Mishra PK, Srivastava RK. High dietary salt intake correlates with modulated Th17-Treg cell balance resulting in enhanced bone loss and impaired bone-microarchitecture in male mice. *Sci Rep*. 2018; 8:2503. <https://doi.org/10.1038/s41598-018-20896-y> PMID:29410520
40. Shashkova EV, Trivedi J, Cline-Smith AB, Ferris C, Buchwald ZS, Gibbs J, Novack D, Aurora R. Osteoclast-Primed Foxp3+ CD8 T Cells Induce T-bet, Eomesodermin, and IFN- $\gamma$  To Regulate Bone Resorption. *J Immunol*. 2016; 197:726–35. <https://doi.org/10.4049/jimmunol.1600253> PMID:27324129
41. Kavand H, van Lintel H, Renaud P. Efficacy of pulsed electromagnetic fields and electromagnetic fields tuned to the ion cyclotron resonance frequency of Ca<sup>2+</sup> on chondrogenic differentiation. *J Tissue Eng Regen Med*. 2019; 13:799–811. <https://doi.org/10.1002/term.2829> PMID:30793837
42. Manolagas SC. Birth and death of bone cells: basic regulatory mechanisms and implications for the pathogenesis and treatment of osteoporosis. *Endocr Rev*. 2000; 21:115–37. <https://doi.org/10.1210/edrv.21.2.0395> PMID:10782361
43. Chia LY, Walsh NC, Martin TJ, Sims NA. Isolation and gene expression of haematopoietic-cell-free preparations of highly purified murine osteocytes. *Bone*. 2015; 72:34–42. <https://doi.org/10.1016/j.bone.2014.11.005> PMID:25460578
44. Sun W, Dong H, Balaz M, Slyper M, Drokhlyansky E, Colleluori G, Giordano A, Kovanicova Z, Stefanicka P, Balazova L, Ding L, Husted AS, Rudofsky G, et al. snRNA-seq reveals a subpopulation of adipocytes that regulates thermogenesis. *Nature*. 2020; 587:98–102. <https://doi.org/10.1038/s41586-020-2856-x> PMID:33116305
45. Chen WT, Lu A, Craessaerts K, Pavie B, Sala Frigerio C, Corthout N, Qian X, Laláková J, Kühnemund M, Voytyuk I, Wolfs L, Mancuso R, Salta E, et al. Spatial Transcriptomics and *In Situ* Sequencing to Study Alzheimer's Disease. *Cell*. 2020; 182:976–91.e19. <https://doi.org/10.1016/j.cell.2020.06.038> PMID:32702314
46. Satpathy AT, Granja JM, Yost KE, Qi Y, Meschi F, McDermott GP, Olsen BN, Mumbach MR, Pierce SE, Corces MR, Shah P, Bell JC, Jhuttu D, et al. Massively parallel single-cell chromatin landscapes of human immune cell development and intratumoral T cell exhaustion. *Nat Biotechnol*. 2019; 37:925–36. <https://doi.org/10.1038/s41587-019-0206-z> PMID:31375813
47. Xie H, Sun M, Liao XB, Yuan LQ, Sheng ZF, Meng JC, Wang D, Yu ZY, Zhang LY, Zhou HD, Luo XH, Li H, Wu XP, et al. Estrogen receptor  $\alpha$ 36 mediates a bone-sparing effect of 17 $\beta$ -estradiol in postmenopausal women. *J Bone Miner Res*. 2011; 26:156–68. <https://doi.org/10.1002/jbmr.169> PMID:20578216
48. Kanis JA, Melton LJ 3rd, Christiansen C, Johnston CC, Khaltsev N. The diagnosis of osteoporosis. *J Bone Miner Res*. 1994; 9:1137–41. <https://doi.org/10.1002/jbmr.5650090802> PMID:7976495

49. Wu XP, Liao EY, Zhang H, Shan PF, Cao XZ, Liu SP. Establishment of BMD reference plots and determination of peak BMD at multiple skeletal regions in mainland Chinese women and the diagnosis of osteoporosis. *Osteoporos Int*. 2004; 15:71–79. <https://doi.org/10.1007/s00198-003-1517-x> PMID:[14598027](https://pubmed.ncbi.nlm.nih.gov/14598027/)
50. Nijweide PJ, van der Plas A, Alblas MJ, Klein-Nulend J. Osteocyte isolation and culture. *Methods Mol Med*. 2003; 80:41–50. <https://doi.org/10.1385/1-59259-366-6:41> PMID:[12728709](https://pubmed.ncbi.nlm.nih.gov/12728709/)
51. Prideaux M, Schutz C, Wijenayaka AR, Findlay DM, Campbell DG, Solomon LB, Atkins GJ. Isolation of osteocytes from human trabecular bone. *Bone*. 2016; 88:64–72. <https://doi.org/10.1016/j.bone.2016.04.017> PMID:[27109824](https://pubmed.ncbi.nlm.nih.gov/27109824/)
52. Satija R, Farrell JA, Gennert D, Schier AF, Regev A. Spatial reconstruction of single-cell gene expression data. *Nat Biotechnol*. 2015; 33:495–502. <https://doi.org/10.1038/nbt.3192> PMID:[25867923](https://pubmed.ncbi.nlm.nih.gov/25867923/)
53. Stuart T, Butler A, Hoffman P, Hafemeister C, Papalexi E, Mauck WM 3rd, Hao Y, Stoeckius M, Smibert P, Satija R. Comprehensive Integration of Single-Cell Data. *Cell*. 2019; 177:1888–902.e21. <https://doi.org/10.1016/j.cell.2019.05.031> PMID:[31178118](https://pubmed.ncbi.nlm.nih.gov/31178118/)
54. Lvd M, Hinton G. Visualizing Data using t-SNE. *J Mach Learn Res*. 2008; 9: 2579–605.
55. Blondel VD, Guillaume JL, Lambiotte R, Lefebvre E. Fast unfolding of communities in large networks. *J Stat Mech*. 2008; P10008. <https://doi.org/10.1088/1742-5468/2008/10/P10008>
56. Yu G, Wang LG, Han Y, He QY. clusterProfiler: an R package for comparing biological themes among gene clusters. *OMICS*. 2012; 16:284–87. <https://doi.org/10.1089/omi.2011.0118> PMID:[22455463](https://pubmed.ncbi.nlm.nih.gov/22455463/)
57. Szklarczyk D, Franceschini A, Wyder S, Forslund K, Heller D, Huerta-Cepas J, Simonovic M, Roth A, Santos A, Tsafou KP, Kuhn M, Bork P, Jensen LJ, von Mering C. STRING v10: protein-protein interaction networks, integrated over the tree of life. *Nucleic Acids Res*. 2015; 43:D447–52. <https://doi.org/10.1093/nar/gku1003> PMID:[25352553](https://pubmed.ncbi.nlm.nih.gov/25352553/)
58. Shannon P, Markiel A, Ozier O, Baliga NS, Wang JT, Ramage D, Amin N, Schwikowski B, Ideker T. Cytoscape: a software environment for integrated models of biomolecular interaction networks. *Genome Res*. 2003; 13:2498–504. <https://doi.org/10.1101/gr.1239303> PMID:[14597658](https://pubmed.ncbi.nlm.nih.gov/14597658/)
59. Chin CH, Chen SH, Wu HH, Ho CW, Ko MT, Lin CY. cytoHubba: identifying hub objects and sub-networks from complex interactome. *BMC Syst Biol*. 2014 (Suppl 4); 8:S11. <https://doi.org/10.1186/1752-0509-8-S4-S11> PMID:[25521941](https://pubmed.ncbi.nlm.nih.gov/25521941/)
60. Bader GD, Hogue CW. An automated method for finding molecular complexes in large protein interaction networks. *BMC Bioinformatics*. 2003; 4:2. <https://doi.org/10.1186/1471-2105-4-2> PMID:[12525261](https://pubmed.ncbi.nlm.nih.gov/12525261/)
61. Maere S, Heymans K, Kuiper M. BiNGO: a Cytoscape plugin to assess overrepresentation of gene ontology categories in biological networks. *Bioinformatics*. 2005; 21:3448–49. <https://doi.org/10.1093/bioinformatics/bti551> PMID:[15972284](https://pubmed.ncbi.nlm.nih.gov/15972284/)
62. Wang Y, Wang R, Zhang S, Song S, Jiang C, Han G, Wang M, Ajani J, Futreal A, Wang L. iTALK: an R Package to Characterize and Illustrate Intercellular Communication. *bioRxiv*. 2019. [Epub ahead of print]. <https://doi.org/10.1101/507871>
63. Barrett T, Wilhite SE, Ledoux P, Evangelista C, Kim IF, Tomashevsky M, Marshall KA, Phillippy KH, Sherman PM, Holko M, Yefanov A, Lee H, Zhang N, et al. NCBI GEO: archive for functional genomics data sets—update. *Nucleic Acids Res*. 2013; 41:D991–95. <https://doi.org/10.1093/nar/gks1193> PMID:[23193258](https://pubmed.ncbi.nlm.nih.gov/23193258/)
64. Alves RD, Eijken M, van de Peppel J, van Leeuwen JP. Calcifying vascular smooth muscle cells and osteoblasts: independent cell types exhibiting extracellular matrix and biomineralization-related mimics. *BMC Genomics*. 2014; 15:965. <https://doi.org/10.1186/1471-2164-15-965> PMID:[25380738](https://pubmed.ncbi.nlm.nih.gov/25380738/)

## SUPPLEMENTARY MATERIALS

### Supplementary Figures

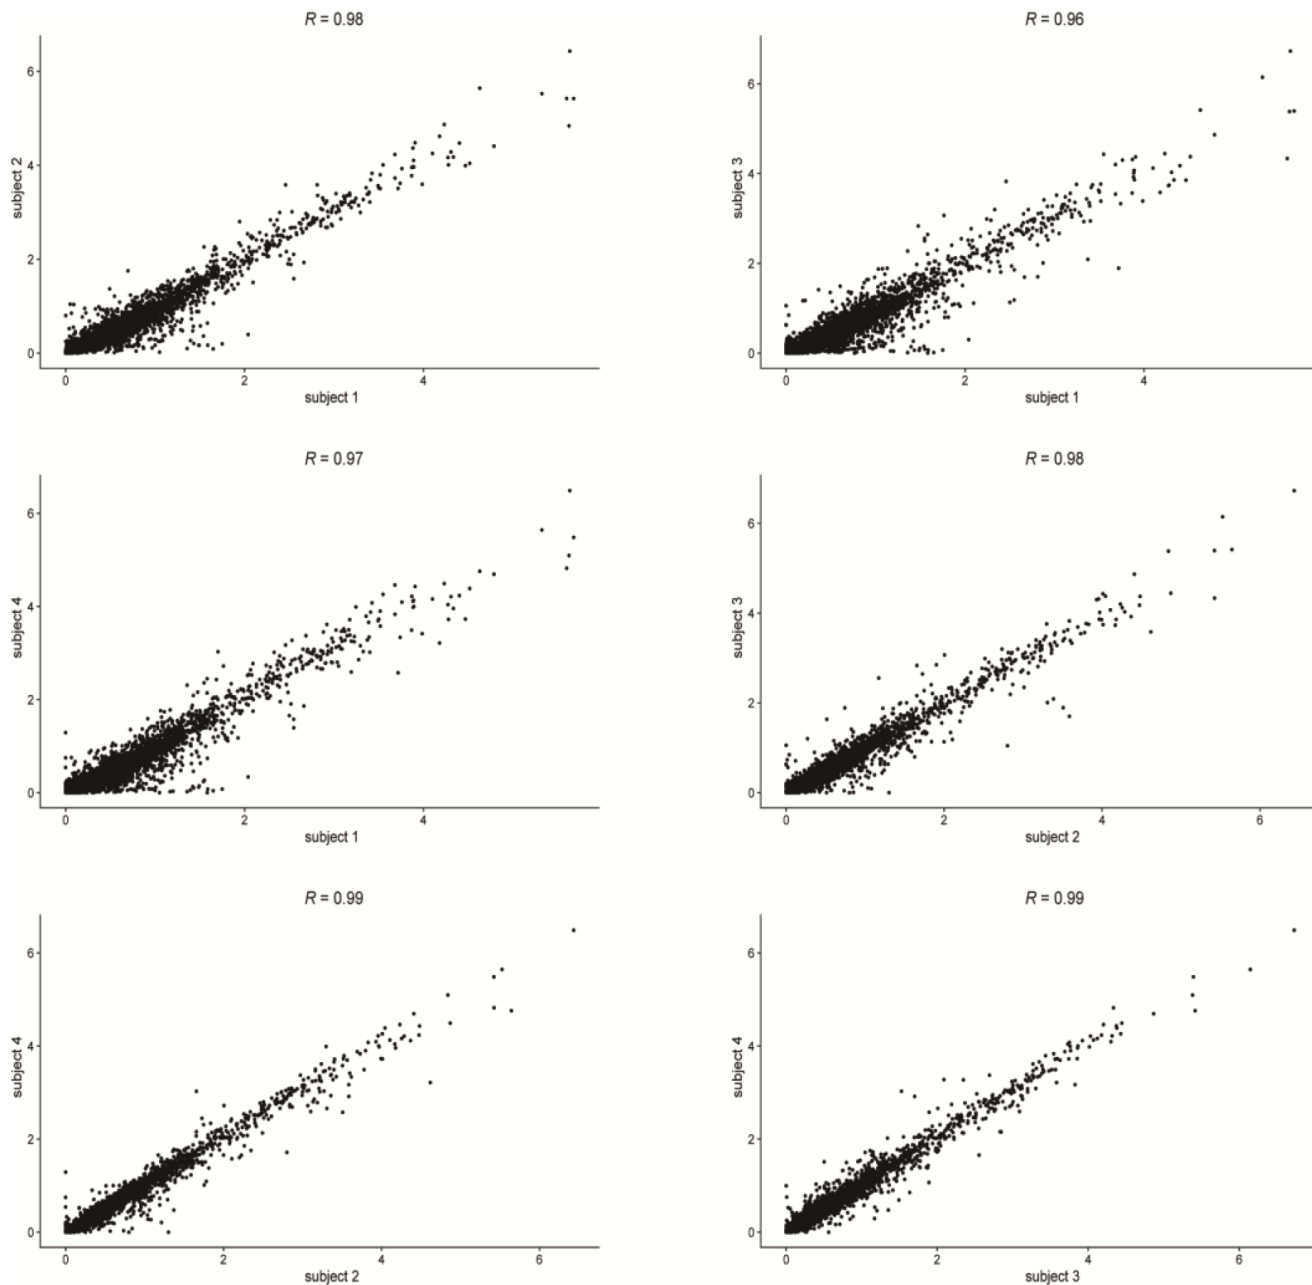

**Supplementary Figure 1. Correlation of gene expression profiles between each two subjects.** Each dot represents an individual gene.

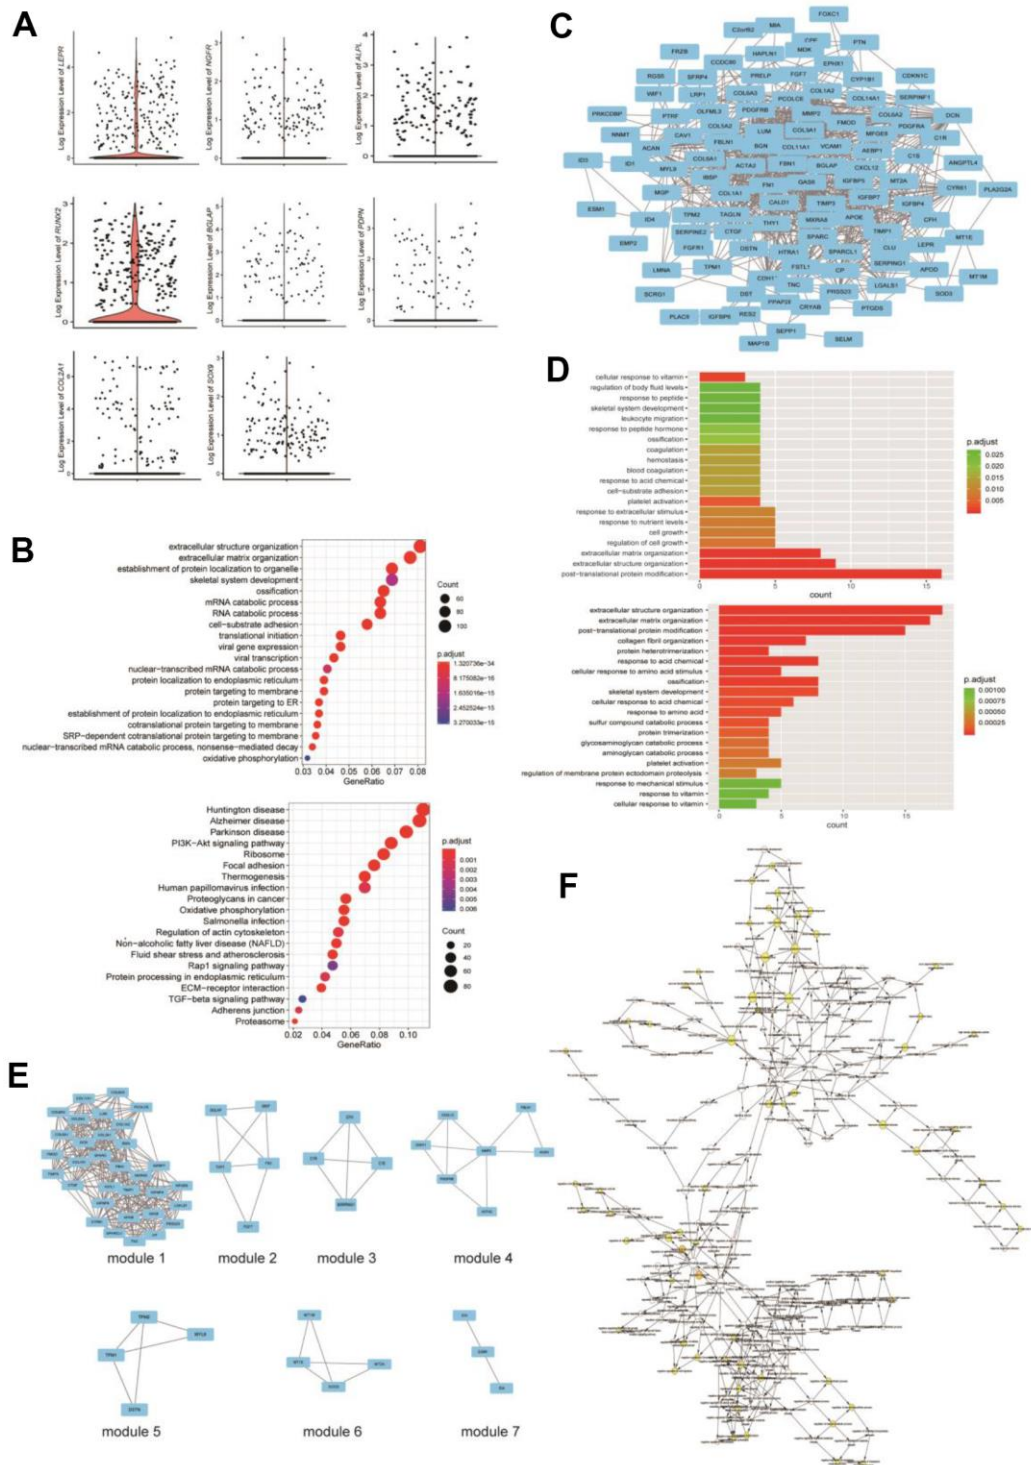

**Supplementary Figure 2. PPI network and module analysis for DEGs of osteoblastic lineage cells.** (A) Violin plots show the expression of marker genes about BM-MSCs (*LEPR*, *NGFR*), osteoblasts (*ALPL*, *RUNX2*, *BGLAP*), osteocytes (*PDPN*), and chondrocytes (*COL2A1*, *SOX9*) in the osteoblastic lineage cells. Each dot represents one cell. (B) GO (above) and KEGG (below) enrichment analysis for DEGs of osteoblastic lineage cells. (C) Visualize PPI network with Cytoscape. The PPI network consists of 111 nodes and 800 edges. (D) GO enrichment analysis of the 20 hub genes with a higher degree of connectivity in gene network (above). GO enrichment analysis of genes in module 1 (below). (E) The geometry view of seven modules. (F) The biological process analysis of hub genes in module 1 was constructed using BiNGO (Cytoscape). The color depth of node refers to the corrected  $p$  value of ontologies. The size of node refers to the number of genes that are involved in the ontologies. The corrected  $p$  value  $< 0.05$  was considered statistically significant.

## Supplementary Tables

Please browse Full Text version to see the data of Supplementary Tables 2–4, 6, 8–13.

**Supplementary Table 1. The detailed information of this study subjects.**

| ID | Age | Gender | Sample       | T-score of BMD  |                | Disease state                   | Date      |
|----|-----|--------|--------------|-----------------|----------------|---------------------------------|-----------|
|    |     |        |              | Lumbar vertebra | Left hip joint |                                 |           |
| S1 | 61  | female | femoral head | -3              | -1.9           | osteoarthritis and osteoporosis | 2019.7.16 |
| S2 | 45  | female | femoral head | -1.3            | -1.2           | osteoarthritis and osteopenia   | 2019.7.19 |
| S3 | 66  | male   | femoral head | NA              | NA             | NA                              | 2019.7.26 |
| S4 | 31  | male   | femoral head | 0.6             | -1.1           | osteoarthritis and osteopenia   | 2019.8.7  |

S3 without bone mineral density test due to the tight schedule of surgery.

**Supplementary Table 2. GO enrichment analyses of osteoblastic lineage cells.**

**Supplementary Table 3. KEGG enrichment analyses of osteoblastic lineage cells.**

**Supplementary Table 4. GO enrichment analysis for top 20 genes of gene network.**

**Supplementary Table 5. The detailed information of each module.**

| Module | Score<br>(Density*#Nodes) | Nodes | Edges | Node IDs                                                                                                                                                                                                                        |
|--------|---------------------------|-------|-------|---------------------------------------------------------------------------------------------------------------------------------------------------------------------------------------------------------------------------------|
| 1      | 19.097                    | 32    | 296   | CTGF, PRSS23, TNC, BGN, TIMP3, FSTL1, FBN1, APOE, LGALS1, SPARCL1, IGFBP4, COL6A3, SPARC, MXRA8, DCN, LUM, MFGE8, COL3A1, GAS6, COL5A2, TIMP1, COL6A2, COL6A1, PCOLCE, IGFBP7, COL1A1, CYR61, COL1A2, FMOD, CP, COL11A1, IGFBP5 |
| 2      | 4                         | 5     | 8     | FN1, FGF7, IBSP, BGLAP, THY1                                                                                                                                                                                                    |
| 3      | 4                         | 4     | 6     | SERPING1, C1S, C1R, CFH                                                                                                                                                                                                         |
| 4      | 3.667                     | 7     | 11    | CDH11, MMP2, PDGFRB, ACAN, FBLN1, CXCL12, ACTA2                                                                                                                                                                                 |
| 5      | 3.333                     | 4     | 5     | TPM1, MYL9, TPM2, DSTN                                                                                                                                                                                                          |
| 6      | 3.333                     | 4     | 5     | MT1E, SOD3, MT2A, MT1M                                                                                                                                                                                                          |
| 7      | 3                         | 3     | 3     | ID4, ID3, ESM1                                                                                                                                                                                                                  |

**Supplementary Table 6. GO enrichment analysis for genes of module 1.**

**Supplementary Table 7. Function of the top 16 hub genes of module 1 in bone metabolism.**

| Gene symbol    | Full name                                                       | Function                                                                                                                                                                                                                                                                                                        |
|----------------|-----------------------------------------------------------------|-----------------------------------------------------------------------------------------------------------------------------------------------------------------------------------------------------------------------------------------------------------------------------------------------------------------|
| <i>PRSS23</i>  | <i>serine protease 23</i>                                       | NA                                                                                                                                                                                                                                                                                                              |
| <i>TNC</i>     | <i>tenascin C</i>                                               | An extracellular matrix glycoprotein involved in osteogenesis and bone mineralization [1].                                                                                                                                                                                                                      |
| <i>FSTL1</i>   | <i>follistatin like 1</i>                                       | Promotes chondrocyte apoptosis [2] and osteoclast formation [3].                                                                                                                                                                                                                                                |
| <i>FBN1</i>    | <i>fibrillin 1</i>                                              | Limits osteoclast formation and function [4]; a negative regulators of bone resorption [5].                                                                                                                                                                                                                     |
| <i>APOE</i>    | <i>apolipoprotein E</i>                                         | Plays crucial roles in maintaining bone mass by promoting osteoblast differentiation and suppressing osteoclast differentiation [6].                                                                                                                                                                            |
| <i>LGALS1</i>  | <i>galectin 1</i>                                               | Relates to osteoblast maturation [7], and plays a role in cell-cell and cell-matrix interactions of osteoblastic cells [8].                                                                                                                                                                                     |
| <i>SPARCL1</i> | <i>SPARC like 1</i>                                             | An extracellular matrix remodel gene [9]; a member of the osteonectin family of proteins [10]; suppresses osteosarcoma metastasis [11].                                                                                                                                                                         |
| <i>IGFBP4</i>  | <i>insulin like growth factor binding protein 4</i>             | Highly expressed in adipocytes and osteoblasts [12]; regulates bone metabolism [13–15].                                                                                                                                                                                                                         |
| <i>MXRA8</i>   | <i>matrix remodeling associated protein 8</i>                   | NA                                                                                                                                                                                                                                                                                                              |
| <i>MFGE8</i>   | <i>milk fat globule EGF and factor V/VIII domain containing</i> | Regulates osteoclast homeostasis and inflammatory bone loss [16].                                                                                                                                                                                                                                               |
| <i>GAS6</i>    | <i>growth arrest specific 6</i>                                 | Enhances the bone resorbing activity of mature osteoclasts [17]; induces osteoclast differentiation [18].                                                                                                                                                                                                       |
| <i>TIMP1</i>   | <i>TIMP metalloproteinase inhibitor 1</i>                       | Inhibits the activity of MMPs and then regulate the degradation of bone extracellular matrix molecules [19].                                                                                                                                                                                                    |
| <i>IGFBP7</i>  | <i>insulin like growth factor binding protein 7</i>             | Inhibits osteoclastogenesis and osteoclast activity [20]; enhanced osteogenic differentiation of BM-MSCs <i>in vitro</i> and promoted new bone formation <i>in vivo</i> [21].                                                                                                                                   |
| <i>CYR61</i>   | <i>cysteine-rich protein 61</i>                                 | Modulates mature osteoblast and osteocyte function to regulate bone mass [22]; stimulates proliferation and differentiation of osteoblasts <i>in vitro</i> and contribute to bone remodeling <i>in vivo</i> in myeloma bone disease [23]; regulates adipocyte differentiation from mesenchymal stem cells [24]. |
| <i>CP</i>      | <i>ceruloplasmin</i>                                            | Inhibits osteoblast activity, mineralization [25, 26].                                                                                                                                                                                                                                                          |
| <i>IGFBP5</i>  | <i>insulin like growth factor binding protein 5</i>             | The IGFBP5 produced by osteoblasts stimulates osteoclastogenesis and bone resorption, and as an osteoblast-osteoclast coupling factor [27].                                                                                                                                                                     |

SPARC: secreted protein acidic and cysteine rich. TIMP: tissue inhibitor of metalloproteinases; MMPs: matrix metalloproteinases; BM-MSCs: bone marrow-derived mesenchymal stem cells.

## Supplementary References

- Li C, Cui Y, Luan J, Zhou X, Li H, Wang H, Shi L, Han J. Tenascin C affects mineralization of SaOS2 osteoblast-like cells through matrix vesicles. *Drug Discov Ther.* 2016; 10:82–87. <https://doi.org/10.5582/ddt.2016.01009> PMID:26961327
- Xu C, Jiang T, Ni S, Chen C, Li C, Zhuang C, Zhao G, Jiang S, Wang L, Zhu R, van Wijnen AJ, Wang Y. FSTL1 promotes nitric oxide-induced chondrocyte apoptosis via activating the SAPK/JNK/caspase3 signaling pathway. *Gene.* 2020; 732:144339. <https://doi.org/10.1016/j.gene.2020.144339> PMID:31927008
- Kim HJ, Kang WY, Seong SJ, Kim SY, Lim MS, Yoon YR. Follistatin-like 1 promotes osteoclast formation via RANKL-mediated NF- $\kappa$ B activation and M-CSF-induced precursor proliferation. *Cell Signal.* 2016; 28:1137–44. <https://doi.org/10.1016/j.cellsig.2016.05.018> PMID:27234130
- Tiedemann K, Boraschi-Diaz I, Rajakumar I, Kaur J, Roughley P, Reinhardt DP, Komarova SV. Fibrillin-1 directly regulates osteoclast formation and function by a dual mechanism. *J Cell Sci.* 2013; 126:4187–94. <https://doi.org/10.1242/jcs.127571> PMID:24039232
- Nistala H, Lee-Arteaga S, Saldone S, Siciliano G, Ramirez F. Extracellular microfibrils control osteoblast-supported osteoclastogenesis by restricting TGF $\beta$  stimulation of RANKL production. *J Biol Chem.* 2010; 285:34126–33. <https://doi.org/10.1074/jbc.M110.125328> PMID:20729550

6. Noguchi T, Ebina K, Hirao M, Otsuru S, Guess AJ, Kawase R, Ohama T, Yamashita S, Etani Y, Okamura G, Yoshikawa H. Apolipoprotein E plays crucial roles in maintaining bone mass by promoting osteoblast differentiation via ERK1/2 pathway and by suppressing osteoclast differentiation via c-Fos, NFATc1, and NF- $\kappa$ B pathway. *Biochem Biophys Res Commun*. 2018; 503:644–50.  
<https://doi.org/10.1016/j.bbrc.2018.06.055>  
PMID:[29906458](https://pubmed.ncbi.nlm.nih.gov/29906458/)
7. Hopwood B, Tsykin A, Findlay DM, Fazzalari NL. Gene expression profile of the bone microenvironment in human fragility fracture bone. *Bone*. 2009; 44:87–101.  
<https://doi.org/10.1016/j.bone.2008.08.120>  
PMID:[18840552](https://pubmed.ncbi.nlm.nih.gov/18840552/)
8. Tübel J, Saldamli B, Wiest I, Jeschke U, Burgkart R. Expression of the tumor markers sialyl Lewis A, sialyl Lewis X, Lewis Y, Thomsen-Friedenreich antigen, galectin-1 and galectin-3 in human osteoblasts *in vitro*. *Anticancer Res*. 2012; 32:2159–64.  
PMID:[22593503](https://pubmed.ncbi.nlm.nih.gov/22593503/)
9. Mintz MB, Sowers R, Brown KM, Hilmer SC, Mazza B, Huvos AG, Meyers PA, Lafleur B, McDonough WS, Henry MM, Ramsey KE, Antonescu CR, Chen W, et al. An expression signature classifies chemotherapy-resistant pediatric osteosarcoma. *Cancer Res*. 2005; 65:1748–54.  
<https://doi.org/10.1158/0008-5472.CAN-04-2463>  
PMID:[15753370](https://pubmed.ncbi.nlm.nih.gov/15753370/)
10. Hashimoto N, Sato T, Yajima T, Fujita M, Sato A, Shimizu Y, Shimada Y, Shoji N, Sasano T, Ichikawa H. SPARCL1-containing neurons in the human brainstem and sensory ganglion. *Somatosens Mot Res*. 2016; 33:112–17.  
<https://doi.org/10.1080/08990220.2016.1197115>  
PMID:[27357901](https://pubmed.ncbi.nlm.nih.gov/27357901/)
11. Zhao SJ, Jiang YQ, Xu NW, Li Q, Zhang Q, Wang SY, Li J, Wang YH, Zhang YL, Jiang SH, Wang YJ, Huang YJ, Zhang XX, et al. SPARCL1 suppresses osteosarcoma metastasis and recruits macrophages by activation of canonical WNT/ $\beta$ -catenin signaling through stabilization of the WNT-receptor complex. *Oncogene*. 2018; 37:1049–61.  
<https://doi.org/10.1038/onc.2017.403> PMID:[29084211](https://pubmed.ncbi.nlm.nih.gov/29084211/)
12. Boney CM, Moats-Staats BM, Stiles AD, D'Ercole AJ. Expression of insulin-like growth factor-I (IGF-I) and IGF-binding proteins during adipogenesis. *Endocrinology*. 1994; 135:1863–68.  
<https://doi.org/10.1210/endo.135.5.7525256>  
PMID:[7525256](https://pubmed.ncbi.nlm.nih.gov/7525256/)
13. Miyakoshi N, Qin X, Kasukawa Y, Richman C, Srivastava AK, Baylink DJ, Mohan S. Systemic administration of insulin-like growth factor (IGF)-binding protein-4 (IGFBP-4) increases bone formation parameters in mice by increasing IGF bioavailability via an IGFBP-4 protease-dependent mechanism. *Endocrinology*. 2001; 142:2641–48.  
<https://doi.org/10.1210/endo.142.6.8192>  
PMID:[11356715](https://pubmed.ncbi.nlm.nih.gov/11356715/)
14. Zhang M, Faugere MC, Malluche H, Rosen CJ, Chernausk SD, Clemens TL. Paracrine overexpression of IGFBP-4 in osteoblasts of transgenic mice decreases bone turnover and causes global growth retardation. *J Bone Miner Res*. 2003; 18:836–43.  
<https://doi.org/10.1359/jbmr.2003.18.5.836>  
PMID:[12733722](https://pubmed.ncbi.nlm.nih.gov/12733722/)
15. Maridas DE, DeMambro VE, Le PT, Nagano K, Baron R, Mohan S, Rosen CJ. IGFBP-4 regulates adult skeletal growth in a sex-specific manner. *J Endocrinol*. 2017; 233:131–44.  
<https://doi.org/10.1530/JOE-16-0673> PMID:[28184001](https://pubmed.ncbi.nlm.nih.gov/28184001/)
16. Abe T, Shin J, Hosur K, Udey MC, Chavakis T, Hajishengallis G. Regulation of osteoclast homeostasis and inflammatory bone loss by MFG-E8. *J Immunol*. 2014; 193:1383–91.  
<https://doi.org/10.4049/jimmunol.1400970>  
PMID:[24958900](https://pubmed.ncbi.nlm.nih.gov/24958900/)
17. Nakamura YS, Hakeda Y, Takakura N, Kameda T, Hamaguchi I, Miyamoto T, Kakudo S, Nakano T, Kumegawa M, Suda T. Tyro 3 receptor tyrosine kinase and its ligand, Gas6, stimulate the function of osteoclasts. *Stem Cells*. 1998; 16:229–38.  
<https://doi.org/10.1002/stem.160229> PMID:[9617898](https://pubmed.ncbi.nlm.nih.gov/9617898/)
18. Ruiz-Heiland G, Zhao Y, Derer A, Braun T, Engelke K, Neumann E, Mueller-Ladner U, Liu Y, Zwerina J, Schett G. Deletion of the receptor tyrosine kinase Tyro3 inhibits synovial hyperplasia and bone damage in arthritis. *Ann Rheum Dis*. 2014; 73:771–79.  
<https://doi.org/10.1136/annrheumdis-2012-202907>  
PMID:[23632195](https://pubmed.ncbi.nlm.nih.gov/23632195/)
19. Hatori K, Sasano Y, Takahashi I, Kamakura S, Kagayama M, Sasaki K. Osteoblasts and osteocytes express MMP2 and -8 and TIMP1, -2, and -3 along with extracellular matrix molecules during appositional bone formation. *Anat Rec A Discov Mol Cell Evol Biol*. 2004; 277:262–71.  
<https://doi.org/10.1002/ar.a.20007> PMID:[15052653](https://pubmed.ncbi.nlm.nih.gov/15052653/)
20. Ye C, Hou W, Chen M, Lu J, Chen E, Tang L, Hang K, Ding Q, Li Y, Zhang W, He R. IGFBP7 acts as a negative regulator of RANKL-induced osteoclastogenesis and oestrogen deficiency-induced bone loss. *Cell Prolif*. 2020; 53:e12752.  
<https://doi.org/10.1111/cpr.12752> PMID:[31889368](https://pubmed.ncbi.nlm.nih.gov/31889368/)
21. Zhang W, Chen E, Chen M, Ye C, Qi Y, Ding Q, Li H, Xue D, Gao X, Pan Z. IGFBP7 regulates the osteogenic



- differentiation of bone marrow-derived mesenchymal stem cells via Wnt/ $\beta$ -catenin signaling pathway. *FASEB J.* 2018; 32:2280–91.  
<https://doi.org/10.1096/fj.201700998RR>  
PMID:[29242275](https://pubmed.ncbi.nlm.nih.gov/29242275/)
22. Zhao G, Huang BL, Rigueur D, Wang W, Bhoot C, Charles KR, Baek J, Mohan S, Jiang J, Lyons KM. CYR61/CCN1 Regulates Sclerostin Levels and Bone Maintenance. *J Bone Miner Res.* 2018; 33:1076–89.  
<https://doi.org/10.1002/jbmr.3394> PMID:[29351359](https://pubmed.ncbi.nlm.nih.gov/29351359/)
23. Liu H, Peng F, Liu Z, Jiang F, Li L, Gao S, Wang G, Song J, Ruan E, Shao Z, Fu R. CYR61/CCN1 stimulates proliferation and differentiation of osteoblasts *in vitro* and contributes to bone remodeling *in vivo* in myeloma bone disease. *Int J Oncol.* 2017; 50:631–39.  
<https://doi.org/10.3892/ijo.2016.3815>  
PMID:[28035364](https://pubmed.ncbi.nlm.nih.gov/28035364/)
24. Yang Y, Qi Q, Wang Y, Shi Y, Yang W, Cen Y, Zhu E, Li X, Chen D, Wang B. Cysteine-rich protein 61 regulates adipocyte differentiation from mesenchymal stem cells through mammalian target of rapamycin complex 1 and canonical Wnt signaling. *FASEB J.* 2018; 32:3096–107.  
<https://doi.org/10.1096/fj.201700830RR>  
PMID:[29401606](https://pubmed.ncbi.nlm.nih.gov/29401606/)
25. Zarjou A, Jeney V, Arosio P, Poli M, Zvaczki E, Balla G, Balla J. Ferritin ferroxidase activity: a potent inhibitor of osteogenesis. *J Bone Miner Res.* 2010; 25:164–72.  
<https://doi.org/10.1359/jbmr.091002> PMID:[19821764](https://pubmed.ncbi.nlm.nih.gov/19821764/)
26. Sikura KÉ, Potor L, Szerafin T, Zarjou A, Agarwal A, Arosio P, Poli M, Hendrik Z, Méhes G, Oros M, Posta N, Beke L, Fürtös I, et al. Potential Role of H-Ferritin in Mitigating Valvular Mineralization. *Arterioscler Thromb Vasc Biol.* 2019; 39:413–31.  
<https://doi.org/10.1161/ATVBAHA.118.312191>  
PMID:[30700131](https://pubmed.ncbi.nlm.nih.gov/30700131/)
27. Peruzzi B, Cappariello A, Del Fattore A, Rucci N, De Benedetti F, Teti A. c-Src and IL-6 inhibit osteoblast differentiation and integrate IGFBP5 signalling. *Nat Commun.* 2012; 3:630.  
<https://doi.org/10.1038/ncomms1651>  
PMID:[22252554](https://pubmed.ncbi.nlm.nih.gov/22252554/)

**Supplementary Table 8. GO enrichment analyses of each monocytes subtype.**

**Supplementary Table 9. KEGG enrichment analyses of each monocytes subtype.**

**Supplementary Table 10. GO enrichment analyses of each T cells subtype.**

**Supplementary Table 11. KEGG enrichment analyses of each T cells subtype.**

**Supplementary Table 12. GO enrichment analyses of each B cells subtype.**

**Supplementary Table 13. KEGG enrichment analyses of each B cells subtype.**
