# Supplementary material for: Single-cell RNA sequencing of human femoral head in vivo
Source: publisher site journal article supplement (doi:10.18632/aging.203124), 2021-06-10
Supplement: Supplementary file [file aging-v13i11-203124-supplementary-material-SD6.pdf]

**Supplementary Table 5. The detailed information of each module.**

| Module | Score<br>(Density*#Nodes) | Nodes | Edges | Node IDs                                                                                                                                                                                                                        |
|--------|---------------------------|-------|-------|---------------------------------------------------------------------------------------------------------------------------------------------------------------------------------------------------------------------------------|
| 1      | 19.097                    | 32    | 296   | CTGF, PRSS23, TNC, BGN, TIMP3, FSTL1, FBN1, APOE, LGALS1, SPARCL1, IGFBP4, COL6A3, SPARC, MXRA8, DCN, LUM, MFGES, COL3A1, GAS6, COL5A2, TIMP1, COL6A2, COL6A1, PCOLCE, IGFBP7, COL1A1, CYR61, COL1A2, FMOD, CP, COL11A1, IGFBP5 |
| 2      | 4                         | 5     | 8     | FN1, FGF7, IBSP, BGLAP, THY1                                                                                                                                                                                                    |
| 3      | 4                         | 4     | 6     | SERPING1, C1S, C1R, CFH                                                                                                                                                                                                         |
| 4      | 3.667                     | 7     | 11    | CDH11, MMP2, PDGFRB, ACAN, FBLN1, CXCL12, ACTA2                                                                                                                                                                                 |
| 5      | 3.333                     | 4     | 5     | TPM1, MYL9, TPM2, DSTN                                                                                                                                                                                                          |
| 6      | 3.333                     | 4     | 5     | MT1E, SOD3, MT2A, MT1M                                                                                                                                                                                                          |
| 7      | 3                         | 3     | 3     | ID4, ID3, ESM1                                                                                                                                                                                                                  |
