# Supplementary material for: Single-cell RNA sequencing of human femoral head in vivo
Source: Aging (Albany NY). 2021 Jun 10;13(11):15595–619. doi: 10.18632/aging.203124 (PMC8221309; doi:10.18632/aging.203124)
Supplement: Supplementary Table 1 [file aging-13-203124-s002.pdf]

**Supplementary Table 1. The detailed information of this study subjects.**

| ID | Age | Gender | Sample       | T-score of BMD  |                | Disease state                   | Date      |
|----|-----|--------|--------------|-----------------|----------------|---------------------------------|-----------|
|    |     |        |              | Lumbar vertebra | Left hip joint |                                 |           |
| S1 | 61  | female | femoral head | -3              | -1.9           | osteoarthritis and osteoporosis | 2019.7.16 |
| S2 | 45  | female | femoral head | -1.3            | -1.2           | osteoarthritis and osteopenia   | 2019.7.19 |
| S3 | 66  | male   | femoral head | NA              | NA             | NA                              | 2019.7.26 |
| S4 | 31  | male   | femoral head | 0.6             | -1.1           | osteoarthritis and osteopenia   | 2019.8.7  |

S3 without bone mineral density test due to the tight schedule of surgery.
