# Supplementary material for: Single-cell RNA sequencing of human femoral head in vivo
Source: Aging (Albany NY). 2021 Jun 10;13(11):15595–619. doi: 10.18632/aging.203124 (PMC8221309; doi:10.18632/aging.203124)
Supplement: Supplementary Table 2 [file aging-13-203124-s003.xlsx]

## Sheet: Sheet1
Supplementary Table 2. GO enrichment analyses of osteoblastic lineage cells.
ID	Description	GeneRatio	BgRatio	pvalue	p.adjust	Count	geneID
GO:0043062	extracellular structure organization	112/1382	387/17913	2.95272e-36	8.20414e-33	112	COL1A1/COL1A2/DCN/IBSP/FN1/COL3A1/APOE/LUM/SPARC/BGN/COL6A2/PLA2G2A/TIMP1/COL6A1/FBLN1/HTRA1/CCDC80/TNC/FOXC1/LRP1/COL6A3/VCAM1/AEBP1/CYP1B1/COL5A2/FMOD/ACAN/COL11A1/FBN1/MMP2/COL14A1/HAPLN1/GAS6/PDGFRA/EMILIN1/LPL/DDR2/COL5A1/COL12A1/CTSK/LAMA4/A2M/ITGB5/COL8A1/ADAMTS4/EFEMP2/CTSL/SULF1/FOXC2/ABI3BP/SMOC2/LOX/MMP14/COL4A1/AGT/ITGA10/LAMB2/PDPN/VWA1/COL4A2/HSPG2/COL16A1/SOX9/LAMC1/ANTXR1/FLRT2/AD…
GO:0030198	extracellular matrix organization	106/1382	334/17913	2.37671e-38	1.32074e-34	106	COL1A1/COL1A2/DCN/IBSP/FN1/COL3A1/LUM/SPARC/BGN/COL6A2/TIMP1/COL6A1/FBLN1/HTRA1/CCDC80/TNC/FOXC1/LRP1/COL6A3/VCAM1/AEBP1/CYP1B1/COL5A2/FMOD/ACAN/COL11A1/FBN1/MMP2/COL14A1/HAPLN1/GAS6/PDGFRA/EMILIN1/DDR2/COL5A1/COL12A1/CTSK/LAMA4/A2M/ITGB5/COL8A1/ADAMTS4/EFEMP2/CTSL/SULF1/FOXC2/ABI3BP/SMOC2/LOX/MMP14/COL4A1/AGT/ITGA10/LAMB2/PDPN/VWA1/COL4A2/HSPG2/COL16A1/SOX9/LAMC1/ANTXR1/FLRT2/ADAMTS5/COL5A3/PDGF…
GO:0072594	establishment of protein localization to organelle	95/1382	452/17913	9.41459e-20	3.07746e-17	95	CLU/LMNA/APOD/AGT/ANGPT1/BAG3/LEPROT/PKIG/SCARB2/YWHAE/BAD/PTTG1IP/YWHAQ/RPL5/PDCD5/CDKN1A/RPL7A/RPL10/RPL24/RPLP0/LMAN1/FIS1/RPL29/ECH1/RPL15/RPS18/RPL10A/RPL3/RPS5/RPS4X/RPS23/CCT3/RPL41/SEC61G/RAN/RPS2/RPL11/RPL35/RPL8/RPL14/DNAJC19/RPL37A/SRP14/SSR3/MBTPS1/MDFIC/CCT7/SLC25A6/PHB2/RPS9/RPS27A/UBB/RPS4Y1/RPL18/RPL23A/NDUFA13/RPL6/RPS3A/RPS19/HSP90AA1/RPL26/RPL19/RPL18A/RPS16/RPL32/TIMM8B/CCT4/T…
GO:0001501	skeletal system development	95/1382	479/17913	5.80391e-18	1.69749e-15	95	COL1A1/COL1A2/MGP/COL3A1/LUM/SPARC/SFRP4/TIMP1/SNORC/PRELP/FOXC1/FRZB/BGLAP/FGFR1/ACAN/COL11A1/CDH11/FBN1/MMP2/PDGFRA/CDKN1C/MDK/PRRX1/GJA1/SERPINH1/CHAD/DLX5/PTH1R/CTSK/ADAMTS4/EFEMP1/MDFI/PLS3/FAM20C/SFRP1/SULF1/FOXC2/BMP5/RBP4/LOX/MMP14/NFIB/TWIST1/SATB2/TMEM119/SNAI2/SOX9/HOXA10/SCIN/TNFRSF11B/TBX15/FGFR3/COL27A1/COL13A1/DLX6/SIX1/SHOX2/TGFBI/RUNX2/ANXA2/SOX4/COMP/ALPL/PBX1/TULP3/SLC39A1/PDGF…
GO:0001503	ossification	90/1382	388/17913	8.43757e-22	3.34911e-19	90	COL1A1/COL1A2/MGP/IBSP/SPARC/IGFBP5/ID3/COL6A1/TNC/FOXC1/BGLAP/COL5A2/COL11A1/ID4/CDH11/MMP2/ID1/PTN/MDK/GJA1/MRC2/DDR2/DLX5/ASPN/PTH1R/CTSK/ENPP1/OMD/FAM20C/SFRP1/FOXC2/BMP5/LOX/MMP14/WWTR1/TWIST1/SATB2/CSF1/TMEM119/SNAI2/SOX9/CHRDL1/INTU/FGFR3/EGFR/NPNT/COL13A1/SHOX2/GPNMB/JAG1/IGFBP3/TWSG1/RUNX2/PTK2/COMP/IL6ST/ALPL/PBX1/VCAN/CEBPD/GPM6B/THRA/SNAI1/EXT2/SMAD5/RRBP1/CTHRC1/BMPR2/DHRS3/ANKH/ILK/…
GO:0006402	mRNA catabolic process	88/1382	338/17913	4.83464e-25	2.83039e-22	88	HSPB1/HSPA1B/PSMB5/VIM/YBX3/ZFP36L1/NT5C3B/ROCK2/RNH1/RPL5/RPL7A/NPM1/NBDY/HSPA1A/RPL10/RPL24/RPLP0/RPL29/RPL15/PSMC3/RPS18/RPL10A/RPL3/PSMB6/CIRBP/RPS5/RPS4X/PSMB1/RPS23/RPL41/RPS2/PSMD8/RPL11/YBX1/SSB/RPL35/RPL8/RPL14/RPL37A/RPS9/RPS27A/UBB/RPS4Y1/RPL18/RPL23A/RPL6/RPS3A/TOB1/RPS19/RPL26/RPL19/RPL18A/RPS16/RPL32/PSMD2/RPL12/HSPA8/RPS3/HNRNPA0/RPL13/PSMA3/PSMC5/PSMD3/PSMB7/PSMC1/PSMA2/RPL35A/HNR…
GO:0006401	RNA catabolic process	88/1382	368/17913	2.72387e-22	1.16435e-19	88	HSPB1/HSPA1B/PSMB5/VIM/YBX3/ZFP36L1/NT5C3B/ROCK2/RNH1/RPL5/RPL7A/NPM1/NBDY/HSPA1A/RPL10/RPL24/RPLP0/RPL29/RPL15/PSMC3/RPS18/RPL10A/RPL3/PSMB6/CIRBP/RPS5/RPS4X/PSMB1/RPS23/RPL41/RPS2/PSMD8/RPL11/YBX1/SSB/RPL35/RPL8/RPL14/RPL37A/RPS9/RPS27A/UBB/RPS4Y1/RPL18/RPL23A/RPL6/RPS3A/TOB1/RPS19/RPL26/RPL19/RPL18A/RPS16/RPL32/PSMD2/RPL12/HSPA8/RPS3/HNRNPA0/RPL13/PSMA3/PSMC5/PSMD3/PSMB7/PSMC1/PSMA2/RPL35A/HNR…
GO:0007005	mitochondrion organization	85/1382	466/17913	5.36892e-14	8.06354e-12	85	DCN/CLU/LMNA/EPAS1/CTSK/CAV2/CTTN/FEZ1/BAG3/LEPROT/BNIP3/JUN/NECTIN2/NDUFS4/YWHAE/PPP2CB/BAD/IGF1/AKT3/YWHAQ/PDCD5/PARK7/HSPA1A/DMAC1/ATP5MC3/NDUFC2/NDUFB4/FAM162A/LMAN1/FIS1/TIMMDC1/ATP5PF/NDUFAF2/NDUFB7/NDUFC1/CHCHD10/ACAA2/NDUFB2/NDUFAF3/MEF2A/COA4/NDUFA8/PHB/NDUFA5/NDUFS5/ALKBH7/VDAC1/NDUFAB1/DNAJC19/NDUFA12/SSBP1/OPTN/STOML2/PRDX3/SLC25A6/PHB2/NDUFB10/SQSTM1/ATP5MC1/NDUFA13/NDUFB5/ATP5F1C/HS…
GO:0031589	cell-substrate adhesion	80/1382	322/17913	1.79734e-21	6.65856e-19	80	COL1A1/FN1/COL3A1/LGALS1/FBLN1/CCDC80/APOD/LRP1/VCAM1/EMP2/ID1/GAS6/PTN/THY1/MDK/EMILIN1/EDIL3/FERMT2/ITGB5/COL8A1/SFRP1/ABI3BP/AXL/SMOC2/MMP14/ECM2/ITGA10/CTTN/LIMCH1/PDPN/CSF1/ANGPT1/PARVA/DLC1/NRP1/EPDR1/COL16A1/LAMC1/ANTXR1/COL5A3/TRIP6/LAMB1/EPHA3/SGCE/NDNF/SNED1/PPFIA2/NPNT/COL13A1/DOCK1/JAM3/EFNA5/ITGA7/SORBS3/JAG1/NID1/ITGA1/SDC4/PTK2/CD63/TNFRSF12A/ITGB1/ADAMTS9/ITGAV/THBS1/GPM6B/PKD1/S1…
GO:0009150	purine ribonucleotide metabolic process	80/1382	500/17913	2.77636e-10	2.20404e-08	80	NUPR1/ENPP1/FAM20C/PDK4/NT5E/PDE5A/AK1/HSPA1B/NME3/ADCY3/ZBTB20/NDUFS4/GUCY1A1/NME4/BAD/PAPSS2/IGF1/DBI/PARK7/HSPA1A/ATP5MC3/NDUFC2/NDUFB4/PAPSS1/ATP5PF/COX6C/DNAJC15/LDHA/NDUFB7/NDUFC1/CHCHD10/ADK/NDUFB2/NDUFA8/RAN/NDUFA5/NDUFS5/NDUFA4/TPI1/NDUFAB1/NDUFA12/STOML2/NDUFB10/ISCU/ATP5MC1/NME1/NDUFA13/EIF6/PKM/NDUFB5/ATP5F1C/UQCRQ/NDUFV2/NDUFB6/COX6A1/MPC1/IMPDH2/UQCC3/CYC1/NDUFB8/NDUFA6/HSPA8/PFKP/P…
GO:0006605	protein targeting	78/1382	364/17913	6.38749e-17	1.61342e-14	78	CLU/LTBP2/PARD3/AKAP12/BAG3/MYO1C/LEPROT/SCARB2/YWHAE/NUCB1/YWHAQ/RPL5/PDCD5/RPL7A/RPL10/RPL24/RPLP0/LMAN1/FIS1/RPL29/ECH1/RPL15/RPS18/RPL10A/RPL3/RPS5/RPS4X/RPS23/RPL41/SEC61G/RPS2/RPL11/OS9/RPL35/RPL8/RPL14/DNAJC19/RPL37A/SRP14/SSR3/SLC25A6/RPS9/RPS27A/UBB/RPS4Y1/RPL18/RPL23A/NDUFA13/RPL6/RPS3A/RPS19/HSP90AA1/RPL26/RPL19/RPL18A/RPS16/RPL32/TIMM8B/RPL12/TOMM20/HSPA8/RPS3/RPL13/TIMM13/SSR2/RPL35A…
GO:0016055	Wnt signaling pathway	75/1382	498/17913	1.51198e-08	8.03316e-07	75	COL1A1/APOE/SFRP4/IGFBP4/CPE/LRP1/FRZB/WIF1/CAV1/PLPP3/IGFBP6/MDK/DLX5/FERMT2/CCND1/MDFI/SFRP1/SULF1/RBMS3/TGFB1I1/FZD8/WWTR1/NDRG2/DKK3/BICC1/SNAI2/YAP1/SOX9/AMOTL2/ADGRA2/DAAM2/BAMBI/EGFR/ZNF703/DIXDC1/TCF7L1/DAB2/EGR1/AMOTL1/SOX4/TCF7L2/CBY1/PSMB5/APP/LZTS2/KLF4/PKD1/CTHRC1/ILK/CTNND1/RYK/HIC1/CTNNB1/PSMC3/PSMB6/PSMB1/RACK1/SKP1/PSMD8/IGFBP2/MDFIC/RPS27A/UBB/PSMD2/AP2M1/PSMA3/PSMC5/PSMD3/PSMB7…
GO:0198738	cell-cell signaling by wnt	75/1382	500/17913	1.79788e-08	9.33723e-07	75	COL1A1/APOE/SFRP4/IGFBP4/CPE/LRP1/FRZB/WIF1/CAV1/PLPP3/IGFBP6/MDK/DLX5/FERMT2/CCND1/MDFI/SFRP1/SULF1/RBMS3/TGFB1I1/FZD8/WWTR1/NDRG2/DKK3/BICC1/SNAI2/YAP1/SOX9/AMOTL2/ADGRA2/DAAM2/BAMBI/EGFR/ZNF703/DIXDC1/TCF7L1/DAB2/EGR1/AMOTL1/SOX4/TCF7L2/CBY1/PSMB5/APP/LZTS2/KLF4/PKD1/CTHRC1/ILK/CTNND1/RYK/HIC1/CTNNB1/PSMC3/PSMB6/PSMB1/RACK1/SKP1/PSMD8/IGFBP2/MDFIC/RPS27A/UBB/PSMD2/AP2M1/PSMA3/PSMC5/PSMD3/PSMB7…
GO:0070482	response to oxygen levels	73/1382	389/17913	8.04788e-13	8.92313e-11	73	COL1A1/CXCL12/CRYAB/SOD3/ANGPTL4/LMNA/VCAM1/PDGFRB/EPAS1/CAV1/PTN/PLOD2/VASN/SFRP1/CYGB/MMP14/TWIST1/WTIP/EDNRA/KCNMA1/NDNF/PTGIS/CST3/PAM/EGR1/ANG/HILPDA/PSMB5/S100B/THBS1/PDLIM1/BNIP3/NDRG1/ZFP36L1/ROCK2/BAD/MYC/CDKN1A/FAM162A/FIS1/PSMC3/ANGPT2/PSMB6/PSMB1/CAPN2/ACAA2/PSMD8/PHB2/RPS27A/UBB/NOP53/PKM/STUB1/ELOC/VEGFA/PSMD2/P4HB/PSMA3/PSMC5/PSMD3/PSMB7/PSMC1/PSMA2/TXN2/PSMA1/HSP90B1/PSMC4/CHCHD2/…
GO:0048667	cell morphogenesis involved in neuron differentiation	72/1382	500/17913	1.81529e-07	6.90929e-06	72	FN1/APOE/CXCL12/LRP1/MAP1B/CDH11/ID1/PTN/THY1/HES1/ENAH/CHL1/NTRK2/DLX5/NCAM1/SDC2/NRP2/SLIT2/NFIB/LAMB2/CTTN/SLIT3/RBFOX2/NDN/FARP1/UNC5B/NRP1/NGFR/FLRT2/PTPRD/NEO1/BOC/FOXD1/NTN4/EFNA5/DCLK1/PARD3/GFRA1/SHOX2/GPC1/ABI2/FEZ1/PTK2/TNFRSF12A/ITGB1/C12orf57/S100B/APP/STXBP1/CHN1/APBB2/PDLIM5/SLC1A3/SOD1/WASL/MYH10/BMPR2/HSP90AB1/SPP1/ILK/METRN/ADARB1/RYK/DPYSL2/MEF2C/SHC1/TMEM106B/RPL24/MEF2A/STK25…
GO:0006979	response to oxidative stress	71/1382	442/17913	2.39727e-09	1.46392e-07	71	COL1A1/APOE/TPM1/CRYAB/SOD3/APOD/SELENOP/CYP1B1/PDGFRB/EPAS1/MMP2/PDGFRA/AXL/CYGB/GPX3/MMP14/GPX8/SCARA3/EGFR/PLA2R1/RHOB/CST3/HSPB1/RBPMS/PAWR/HSPA1B/PSMB5/APP/PDLIM1/PRDX1/KLF4/BNIP3/PDGFD/NFE2L1/SOD1/NET1/JUN/PPP2CB/PON2/BAD/GPX4/AKR1C3/MGMT/GSTP1/PARK7/HSPA1A/PRDX2/NDUFB4/CTNNB1/PRDX6/SPHK1/CAPN2/EEF2/RWDD1/RACK1/STK25/NDUFA12/ARL6IP5/PRDX3/PRKRA/ATP2A2/ERCC1/NDUFA6/CCS/RPS3/P4HB/KLF2/TXNIP/T…
GO:0001666	response to hypoxia	70/1382	354/17913	1.75083e-13	2.33812e-11	70	CXCL12/CRYAB/SOD3/ANGPTL4/LMNA/VCAM1/EPAS1/CAV1/PTN/PLOD2/VASN/SFRP1/CYGB/MMP14/TWIST1/WTIP/EDNRA/KCNMA1/NDNF/PTGIS/CST3/PAM/EGR1/ANG/HILPDA/PSMB5/S100B/THBS1/PDLIM1/BNIP3/NDRG1/ZFP36L1/ROCK2/BAD/MYC/FAM162A/FIS1/PSMC3/ANGPT2/PSMB6/PSMB1/CAPN2/ACAA2/PSMD8/PHB2/RPS27A/UBB/NOP53/PKM/STUB1/ELOC/VEGFA/PSMD2/P4HB/PSMA3/PSMC5/PSMD3/PSMB7/PSMC1/PSMA2/TXN2/PSMA1/HSP90B1/PSMC4/CHCHD2/DDIT4/PSME2/EIF4EBP1/…
GO:0043687	post-translational protein modification	70/1382	360/17913	4.10275e-13	4.9563e-11	70	FN1/APOE/IGFBP5/IGFBP7/LGALS1/TIMP1/IGFBP4/SPARCL1/TNC/MXRA8/FBN1/EPAS1/GAS6/FSTL1/MFGE8/CP/PRSS23/SDC2/TF/LTBP1/FAM20C/LAMB2/VWA1/CSF1/CHRDL1/LAMC1/LAMB1/FBXO17/RCN1/IGFBP3/CST3/GOLM1/LMO7/SOCS3/VCAN/PSMB5/APP/CALU/CRTAP/FBXO32/RAB13/SPP1/NUCB1/COPS8/COPS6/PSMC3/PSMB6/PSMB1/PDIA6/KTN1/SKP1/PSMD8/RNF7/RAB2A/MBTPS1/SUMF2/ELOC/NEDD8/PSMD2/P4HB/PSMA3/PSMC5/PSMD3/PSMB7/PSMC1/PSMA2/PSMA1/HSP90B1/PSMC4…
GO:0036293	response to decreased oxygen levels	70/1382	365/17913	8.1893e-13	8.92313e-11	70	CXCL12/CRYAB/SOD3/ANGPTL4/LMNA/VCAM1/EPAS1/CAV1/PTN/PLOD2/VASN/SFRP1/CYGB/MMP14/TWIST1/WTIP/EDNRA/KCNMA1/NDNF/PTGIS/CST3/PAM/EGR1/ANG/HILPDA/PSMB5/S100B/THBS1/PDLIM1/BNIP3/NDRG1/ZFP36L1/ROCK2/BAD/MYC/FAM162A/FIS1/PSMC3/ANGPT2/PSMB6/PSMB1/CAPN2/ACAA2/PSMD8/PHB2/RPS27A/UBB/NOP53/PKM/STUB1/ELOC/VEGFA/PSMD2/P4HB/PSMA3/PSMC5/PSMD3/PSMB7/PSMC1/PSMA2/TXN2/PSMA1/HSP90B1/PSMC4/CHCHD2/DDIT4/PSME2/EIF4EBP1/…
GO:0050673	epithelial cell proliferation	70/1382	425/17913	1.04533e-09	7.54405e-08	70	APOE/SPARC/IGFBP5/CXCL12/IGFBP4/SERPINF1/HTRA1/FGFR1/NUPR1/ID1/CAV1/PTN/FGF7/CDKN1C/MDK/HES1/NR2F2/GJA1/ERRFI1/DLX5/CCND1/COL8A1/NRP2/SFRP1/SULF1/CAV2/BMP5/MMP14/NFIB/TWIST1/NRP1/SNAI2/YAP1/SOX9/NGFR/LAMC1/LAMB1/INTU/FAP/EGFR/ZNF703/DLX6/SIX1/IGFBP3/KLF9/TCF7L2/ANG/SAV1/THBS1/CCL2/MAGED1/CD109/JUN/ZFP36L1/TNFSF12/BMPR2/PURA/BAD/IGF1/AKT3/MYC/MYDGF/IFT57/MEF2C/CTNNB1/NR4A1/PHB2/NME1/VEGFA/ZFP36
GO:0022411	cellular component disassembly	70/1382	492/17913	4.2604e-07	1.45246e-05	70	DSTN/TIMP1/HTRA1/LRP1/MAP1B/MMP2/CAV1/DDR2/EPS8/CTSK/A2M/ADAMTS4/CTSL/PLEKHH2/MMP14/CTTN/PDPN/SNAI2/LAMC1/ADAMTS5/LMOD1/SCIN/FAP/LIMA1/SMARCD3/CST3/ASPH/RETREG1/BNIP3/TIMP2/GSN/CFL2/MYC/FSCN1/RDX/GADD45GIP1/PARK7/MRPL32/CHMP5/MRPS26/CTNNB1/MRPL18/FIS1/MRPL34/MRPL43/MRPL27/MRPL40/CAPN2/MRPS21/CHCHD10/VDAC1/MRPL17/OPTN/EIF5A/MRPL36/TRMT112/SQSTM1/MRPL33/MRPL41/HSPA8/MRPS36/MRPL20/MRPL14/MRPS6/MRPS1…
GO:0009636	response to toxic substance	70/1382	499/17913	7.25291e-07	2.22676e-05	70	COL1A1/APOE/SPARC/ADIRF/CRYAB/TNC/VCAM1/CYP1B1/BGLAP/MAP1B/PDGFRB/NUPR1/EPHX1/CDO1/EPS8/CCND1/AXL/CYGB/GPX3/RBP4/GPX8/GSTM3/KCNMA1/RHOB/CST3/EGR1/PAWR/PRDX4/SELENOW/KLF4/BNIP3/MGST3/PDGFD/SOD1/NET1/GSN/JUN/ESD/PPP2CB/SDF4/BAD/GPX4/NUCB1/MGMT/SETD7/CDKN1A/GSTP1/PARK7/PRDX2/FIS1/RPL10A/PRDX6/SPHK1/CES1/CAPN2/EEF2/RACK1/PHB/STK25/PRDX3/TUFM/GSTO1/RPS3/AKR1A1/HNRNPA1/KLF2/TXNIP/FOS/AHR/EIF4EBP1
GO:0009141	nucleoside triphosphate metabolic process	69/1382	337/17913	4.4493e-14	7.06422e-12	69	NUPR1/ENPP1/FAM20C/AK1/HSPA1B/NME3/ZBTB20/NDUFS4/NME4/BAD/IGF1/PARK7/HSPA1A/ATP5MC3/NDUFC2/NDUFB4/ATP5PF/COX6C/DNAJC15/LDHA/NDUFB7/NDUFC1/CHCHD10/ADK/NDUFB2/NDUFA8/RAN/NDUFA5/NDUFS5/NDUFA4/TPI1/NDUFAB1/NDUFA12/STOML2/NDUFB10/ISCU/ATP5MC1/NME1/NDUFA13/EIF6/PKM/NDUFB5/ATP5F1C/UQCRQ/NDUFV2/NDUFB6/COX6A1/CMPK1/UQCC3/CYC1/NDUFB8/NDUFA6/HSPA8/PFKP/PGAM1/NDUFA11/NUDT5/ATP5PO/ATP5F1D/NDUFB3/ATP5F1B/ATP5M…
GO:0009123	nucleoside monophosphate metabolic process	69/1382	349/17913	2.63653e-13	3.40475e-11	69	NUPR1/ENPP1/FAM20C/NT5E/AK1/HSPA1B/ZBTB20/NDUFS4/BAD/IGF1/PARK7/HSPA1A/ATP5MC3/NDUFC2/NDUFB4/ATP5PF/COX6C/DNAJC15/LDHA/NDUFB7/NDUFC1/CHCHD10/ADK/NDUFB2/NDUFA8/NDUFA5/NDUFS5/NDUFA4/TPI1/NDUFAB1/NDUFA12/STOML2/NDUFB10/ISCU/ATP5MC1/NDUFA13/EIF6/PKM/NDUFB5/ATP5F1C/UQCRQ/NDUFV2/NDUFB6/COX6A1/CMPK1/IMPDH2/UQCC3/CYC1/NDUFB8/NDUFA6/HSPA8/PFKP/PGAM1/NDUFA11/NUDT5/ATP5PO/ATP5F1D/NDUFB3/ATP5F1B/ATP5MF/COX7C…
GO:2001233	regulation of apoptotic signaling pathway	69/1382	397/17913	1.26174e-10	1.07869e-08	69	CLU/CXCL12/LMNA/TIMP3/FGFR1/NUPR1/CAV1/ACKR3/SFRP1/BMP5/AGT/CTTN/UNC5B/NRP1/SNAI2/YAP1/SRPX/HSPB1/TCF7L2/LTBR/HSPA1B/TNFRSF12A/ITGAV/THBS1/BNIP3/SNAI1/MAGED1/SOD1/GSN/YBX3/ATF3/TNFSF12/YWHAE/CTNNA1/BAD/IGF1/PTTG1IP/YWHAQ/PDCD5/GSTP1/LGALS3/MIF/PARK7/HSPA1A/PRDX2/CTNNB1/COL2A1/FAM162A/FIS1/CHCHD10/ACAA2/RACK1/VDAC2/PDIA3/RPL11/PEA15/ITM2C/PRKRA/UBB/NDUFA13/RPL26/INHBA/RPS3/DNAJA1/IFI6/PRELID1/P4HB…
GO:0061458	reproductive system development	69/1382	429/17913	3.82138e-09	2.25908e-07	69	DCN/SERPINF1/SERPINE2/HTRA1/TNC/FOXC1/PDGFRB/ID4/EPAS1/NUPR1/PTN/PDGFRA/CDKN1C/HES1/NR2F2/ADAMTS1/GJA1/RHOBTB3/PLEKHA5/CCND1/MDFI/SFRP1/SULF1/AXL/BMP5/RBP4/MMP14/SLIT2/SLIT3/SOX9/KITLG/HOXA10/HEY2/EGFR/PTGIS/CST3/PTK2/ANG/SOCS3/PRDX4/PHLDA2/PKD1/SNAI1/ARID5B/SOD1/YBX3/ZFP36L1/RAB13/BMPR2/HSP90AB1/SPP1/CTNNA1/AKR1C3/CRIP1/CTNNB1/CTSB/PHB/FKBP4/DNAJC19/PRDX3/UBB/ERCC1/JUNB/TMED2/VEGFA/INHBA/FLNA/HS…
GO:0003012	muscle system process	69/1382	448/17913	2.31966e-08	1.15093e-06	69	IGFBP5/CALD1/TPM2/ACTA2/MYL9/TPM1/CRYAB/LMNA/CAV1/SSPN/FXYD1/GJA1/ERRFI1/ITGB5/SULF1/SORBS2/AGT/CTTN/PLN/SSTR2/LMOD1/EDNRA/KCNMA1/PRKG1/HEY2/NPNT/HSPB6/PDE5A/ANK2/SMTN/SORBS3/MYLK/ITGA1/ASPH/PTK2/COMP/IL6ST/LMCD1/VIM/C12orf57/MYOF/KLF4/PDLIM5/MYH11/VEGFB/SMAD5/SOD1/GSN/CAMK2D/ROCK2/TNFRSF1A/GUCY1A1/MYL6B/IGF1/TPM4/MEF2C/SPHK1/EEF2/MEF2A/SMAD7/HSBP1/SRI/CALM2/ATP2A2/GSTO1/ATP1A1/FLNA/GLRX3/ENO1
GO:0090150	establishment of protein localization to membrane	68/1382	287/17913	2.88197e-17	7.62623e-15	68	RAB34/MAPK10/EGFR/PARD3/MYO1C/AFDN/YWHAE/BAD/YWHAQ/RPL5/PDCD5/RPL7A/RPL10/RPL24/RPLP0/FIS1/RPL29/RPL15/RPS18/RPL10A/RPL3/RPS5/RPS4X/CLSTN1/RPS23/RACK1/RPL41/RPS2/RPL11/RPL35/RPL8/RPL14/RPL37A/SRP14/SSR3/OPTN/RPS9/RPS27A/RPS4Y1/RPL18/RPL23A/NDUFA13/RPL6/RPS3A/RPS19/HSP90AA1/RPL26/RPL19/RPL18A/RPS16/RPL32/RPL12/RPS3/RPL13/RFTN1/SSR2/RPL35A/HSPA5/RPL36/RPL4/RPL36A/RPS25/RPL13A/RPL17/RPS13/RPL31/RPS1…
GO:0009144	purine nucleoside triphosphate metabolic process	68/1382	321/17913	1.18878e-14	2.75252e-12	68	NUPR1/ENPP1/FAM20C/AK1/HSPA1B/NME3/ZBTB20/NDUFS4/NME4/BAD/IGF1/PARK7/HSPA1A/ATP5MC3/NDUFC2/NDUFB4/ATP5PF/COX6C/DNAJC15/LDHA/NDUFB7/NDUFC1/CHCHD10/ADK/NDUFB2/NDUFA8/RAN/NDUFA5/NDUFS5/NDUFA4/TPI1/NDUFAB1/NDUFA12/STOML2/NDUFB10/ISCU/ATP5MC1/NME1/NDUFA13/EIF6/PKM/NDUFB5/ATP5F1C/UQCRQ/NDUFV2/NDUFB6/COX6A1/UQCC3/CYC1/NDUFB8/NDUFA6/HSPA8/PFKP/PGAM1/NDUFA11/NUDT5/ATP5PO/ATP5F1D/NDUFB3/ATP5F1B/ATP5MF/COX7…
GO:0009161	ribonucleoside monophosphate metabolic process	68/1382	331/17913	5.74697e-14	8.18869e-12	68	NUPR1/ENPP1/FAM20C/NT5E/AK1/HSPA1B/ZBTB20/NDUFS4/BAD/IGF1/PARK7/HSPA1A/ATP5MC3/NDUFC2/NDUFB4/ATP5PF/COX6C/DNAJC15/LDHA/NDUFB7/NDUFC1/CHCHD10/ADK/NDUFB2/NDUFA8/NDUFA5/NDUFS5/NDUFA4/TPI1/NDUFAB1/NDUFA12/STOML2/NDUFB10/ISCU/ATP5MC1/NDUFA13/EIF6/PKM/NDUFB5/ATP5F1C/UQCRQ/NDUFV2/NDUFB6/COX6A1/CMPK1/IMPDH2/UQCC3/CYC1/NDUFB8/NDUFA6/HSPA8/PFKP/PGAM1/NDUFA11/NUDT5/ATP5PO/ATP5F1D/NDUFB3/ATP5F1B/ATP5MF/COX7C…
GO:0048608	reproductive structure development	68/1382	426/17913	6.80558e-09	3.82006e-07	68	DCN/SERPINF1/SERPINE2/HTRA1/TNC/FOXC1/PDGFRB/ID4/EPAS1/NUPR1/PTN/PDGFRA/CDKN1C/HES1/NR2F2/ADAMTS1/GJA1/RHOBTB3/CCND1/MDFI/SFRP1/SULF1/AXL/BMP5/RBP4/MMP14/SLIT2/SLIT3/SOX9/KITLG/HOXA10/HEY2/EGFR/PTGIS/CST3/PTK2/ANG/SOCS3/PRDX4/PHLDA2/PKD1/SNAI1/ARID5B/SOD1/YBX3/ZFP36L1/RAB13/BMPR2/HSP90AB1/SPP1/CTNNA1/AKR1C3/CRIP1/CTNNB1/CTSB/PHB/FKBP4/DNAJC19/PRDX3/UBB/ERCC1/JUNB/TMED2/VEGFA/INHBA/FLNA/HSPA5/EIF2…
GO:0051493	regulation of cytoskeleton organization	68/1382	472/17913	3.91106e-07	1.34697e-05	68	CXCL12/DSTN/TPM1/LRP1/MAP1B/PDGFRB/ID1/PDGFRA/MDK/RHOC/EPS8/SFRP1/PLEKHH2/SLIT2/CTTN/LIMCH1/CDC42EP5/DLC1/NRP1/NCKAP1/PFN2/PDGFA/LMOD1/EPHA3/SCIN/KIRREL1/SYDE1/JAM3/EFNA5/DIXDC1/CAMSAP2/LIMA1/SORBS3/PHLDB1/ABI2/PAM/SDC4/PTK2/CLIC4/HSPA1B/NEXN/MYO1C/GPM6B/PKD1/S100A10/WASL/GSN/PHLDB2/ROCK2/ILK/PHPT1/CFL2/FSCN1/RDX/ARL2/NPM1/HSPA1A/MEF2C/CHMP5/CTNNB1/SNX9/CAPN2/ABL2/FKBP4/PFDN2/FLNA/RPS3/AKAP9
GO:0009205	purine ribonucleoside triphosphate metabolic process	67/1382	314/17913	1.29018e-14	2.86781e-12	67	NUPR1/ENPP1/FAM20C/AK1/HSPA1B/NME3/ZBTB20/NDUFS4/NME4/BAD/IGF1/PARK7/HSPA1A/ATP5MC3/NDUFC2/NDUFB4/ATP5PF/COX6C/DNAJC15/LDHA/NDUFB7/NDUFC1/CHCHD10/NDUFB2/NDUFA8/RAN/NDUFA5/NDUFS5/NDUFA4/TPI1/NDUFAB1/NDUFA12/STOML2/NDUFB10/ISCU/ATP5MC1/NME1/NDUFA13/EIF6/PKM/NDUFB5/ATP5F1C/UQCRQ/NDUFV2/NDUFB6/COX6A1/UQCC3/CYC1/NDUFB8/NDUFA6/HSPA8/PFKP/PGAM1/NDUFA11/NUDT5/ATP5PO/ATP5F1D/NDUFB3/ATP5F1B/ATP5MF/COX7C/AT…
GO:0009167	purine ribonucleoside monophosphate metabolic process	67/1382	317/17913	2.09949e-14	3.88895e-12	67	NUPR1/ENPP1/FAM20C/NT5E/AK1/HSPA1B/ZBTB20/NDUFS4/BAD/IGF1/PARK7/HSPA1A/ATP5MC3/NDUFC2/NDUFB4/ATP5PF/COX6C/DNAJC15/LDHA/NDUFB7/NDUFC1/CHCHD10/ADK/NDUFB2/NDUFA8/NDUFA5/NDUFS5/NDUFA4/TPI1/NDUFAB1/NDUFA12/STOML2/NDUFB10/ISCU/ATP5MC1/NDUFA13/EIF6/PKM/NDUFB5/ATP5F1C/UQCRQ/NDUFV2/NDUFB6/COX6A1/IMPDH2/UQCC3/CYC1/NDUFB8/NDUFA6/HSPA8/PFKP/PGAM1/NDUFA11/NUDT5/ATP5PO/ATP5F1D/NDUFB3/ATP5F1B/ATP5MF/COX7C/ATP5M…
GO:0009126	purine nucleoside monophosphate metabolic process	67/1382	318/17913	2.46527e-14	4.41919e-12	67	NUPR1/ENPP1/FAM20C/NT5E/AK1/HSPA1B/ZBTB20/NDUFS4/BAD/IGF1/PARK7/HSPA1A/ATP5MC3/NDUFC2/NDUFB4/ATP5PF/COX6C/DNAJC15/LDHA/NDUFB7/NDUFC1/CHCHD10/ADK/NDUFB2/NDUFA8/NDUFA5/NDUFS5/NDUFA4/TPI1/NDUFAB1/NDUFA12/STOML2/NDUFB10/ISCU/ATP5MC1/NDUFA13/EIF6/PKM/NDUFB5/ATP5F1C/UQCRQ/NDUFV2/NDUFB6/COX6A1/IMPDH2/UQCC3/CYC1/NDUFB8/NDUFA6/HSPA8/PFKP/PGAM1/NDUFA11/NUDT5/ATP5PO/ATP5F1D/NDUFB3/ATP5F1B/ATP5MF/COX7C/ATP5M…
GO:0009199	ribonucleoside triphosphate metabolic process	67/1382	319/17913	2.89235e-14	5.02275e-12	67	NUPR1/ENPP1/FAM20C/AK1/HSPA1B/NME3/ZBTB20/NDUFS4/NME4/BAD/IGF1/PARK7/HSPA1A/ATP5MC3/NDUFC2/NDUFB4/ATP5PF/COX6C/DNAJC15/LDHA/NDUFB7/NDUFC1/CHCHD10/NDUFB2/NDUFA8/RAN/NDUFA5/NDUFS5/NDUFA4/TPI1/NDUFAB1/NDUFA12/STOML2/NDUFB10/ISCU/ATP5MC1/NME1/NDUFA13/EIF6/PKM/NDUFB5/ATP5F1C/UQCRQ/NDUFV2/NDUFB6/COX6A1/UQCC3/CYC1/NDUFB8/NDUFA6/HSPA8/PFKP/PGAM1/NDUFA11/NUDT5/ATP5PO/ATP5F1D/NDUFB3/ATP5F1B/ATP5MF/COX7C/AT…
GO:0061564	axon development	67/1382	438/17913	4.85568e-08	2.19374e-06	67	FN1/APOE/CXCL12/TNC/APOD/LRP1/MAP1B/CDH11/CRTAC1/PTN/THY1/ENAH/CHL1/NTRK2/DLX5/NCAM1/NRP2/SLIT2/NFIB/LAMB2/CTTN/SLIT3/NDN/UNC5B/NRP1/NGFR/FLRT2/EPHA3/NEO1/BOC/FOXD1/NTN4/JAM3/EFNA5/DCLK1/PARD3/GFRA1/CAMSAP2/SHOX2/GPC1/FEZ1/PTK2/TNFRSF12A/ITGB1/C12orf57/S100B/APP/STXBP1/CHN1/APBB2/KLF4/JUN/MYH10/BMPR2/HSP90AB1/SPP1/CTNNA1/ILK/METRN/ADARB1/RYK/DPYSL2/SHC1/RPL24/STK25/HSP90AA1/VEGFA
GO:0007178	transmembrane receptor protein serine/threonine kinase signaling pathway	66/1382	323/17913	1.76716e-13	2.33812e-11	66	COL1A2/COL3A1/SFRP4/HTRA1/FMOD/FBN1/ID1/CAV1/FSTL1/PMEPA1/CDKN1C/HES1/NBL1/EMILIN1/DLX5/LTBP2/FERMT2/ASPN/ITGB5/LTBP1/VASN/SFRP1/SULF1/CAV2/BMP5/TGFB1I1/LOX/WWTR1/DKK3/CHRDL1/BAMBI/NEO1/FOXD1/NPNT/ZNF703/PARD3/FST/TWSG1/RBPMS/LTBP4/RUNX2/DAB2/EGR1/PTK2/COMP/VIM/THBS1/ENG/CD109/SMAD5/JUN/BMPR2/HSP90AB1/ILK/ITGA8/HSPA1A/ZEB1/SMAD7/RPS27A/UBB/TOB1/STUB1/INHBA/FAM89B/HSPA5/FOS
GO:0001655	urogenital system development	65/1382	324/17913	6.53323e-13	7.40921e-11	65	DCN/ACTA2/SERPINF1/ID3/TNC/FOXC1/FGFR1/PDGFRB/ID4/FBN1/PDGFRA/CDKN1C/HES1/ADAMTS1/NOTCH3/PGF/SFRP1/SULF1/FOXC2/RBP4/COL4A1/SLIT2/AGT/TNS2/LAMB2/WWTR1/ANGPT1/IRX3/ENPEP/NRP1/YAP1/SOX9/PDGFA/FOXD1/NPNT/SIX1/NFIA/JAG1/NID1/KANK2/EGR1/SDC4/SOX4/PBX1/LZTS2/ARL3/AHI1/PKD1/PDGFD/MAGED1/PCSK5/ARID5B/SMAD5/ILK/ITGA8/SPRY1/MYC/CRIP1/MEF2C/CTNNB1/ANGPT2/SMAD7/TMED10/FKBP4/VEGFA
GO:0048568	embryonic organ development	65/1382	413/17913	2.56131e-08	1.25957e-06	65	ID3/FOXC1/FRZB/RARRES2/FGFR1/COL11A1/FBN1/EPAS1/PDGFRA/CDKN1C/PRRX1/HES1/NR2F2/GJA1/DLX5/EFEMP1/MDFI/FOXC2/BMP5/RBP4/MMP14/TWIST1/SATB2/YAP1/SOX9/KITLG/TBX2/ALDH1A3/PDGFA/TBX15/HEY2/EGFR/DLX6/SIX1/SHOX2/MAFB/RUNX2/PBX1/TULP3/SLC39A1/SOCS3/PDGFC/ENG/PHLDA2/AHI1/PKD1/SNAI1/PCSK5/SOD1/CTHRC1/ZFP36L1/ITGA8/IFT57/MEF2C/CTNNB1/COL2A1/RPL10/ZEB1/GNAS/INSIG2/PRKRA/ERCC1/JUNB/TMED2/VEGFA
GO:0043410	positive regulation of MAPK cascade	65/1382	499/17913	2.10162e-05	0.000373121	65	APOE/PLA2G2A/IGFBP4/LRP1/FGFR1/PDGFRB/GAS6/CAVIN3/PDGFRA/NTRK2/ACKR3/C1QTNF1/CAV2/FZD8/ANGPT1/NRP1/KITLG/SASH1/MAPK10/GHR/PDGFA/FGFR3/EGFR/NPNT/PDE5A/CSPG4/GPNMB/SORBS3/AKAP12/IGFBP3/ITGA1/CD81/LTBR/APP/THBS1/GADD45B/NENF/TIMP2/MAGED1/SOD1/JUN/ROCK2/HACD3/ILK/MAP3K20/IGF1/RYK/MYDGF/MIF/PRDX2/SHC1/CTNNB1/PRMT1/SPHK1/PHB/STK25/PEA15/MDFIC/ARL6IP5/PHB2/RPS27A/UBB/VEGFA/RPS3/GADD45A
GO:0006413	translational initiation	64/1382	183/17913	3.3065e-26	2.29678e-23	64	HSPB1/RPL5/RPL7A/NPM1/EIF4A1/RPL10/RPL24/RPLP0/RPL29/RPL15/RPS18/RPL10A/RPL3/RPS5/RPS4X/RPS23/EIF4A2/RPL41/RPS2/RPL11/RPL35/RPL8/RPL14/RPL37A/RPS9/RPS27A/RPS4Y1/RPL18/RPL23A/RPL6/EIF6/DDX1/RPS3A/EIF3I/RPS19/RPL26/RPL19/RPL18A/RPS16/RPL32/RPL12/RPS3/EIF3G/RPL13/EIF5B/RPL35A/PPP1R15A/RPL36/RPL4/EIF2B1/RPL36A/RPS25/RPL13A/RPL17/EIF2A/EIF1AX/RPS13/EIF2S2/EIF3B/RPL31/EIF3D/RPS17/RPL22/EIF4EBP1
GO:0019080	viral gene expression	64/1382	191/17913	5.09338e-25	2.83039e-22	64	IFITM3/JUN/NUCKS1/RPL5/RPL7A/POLR2F/RPL10/RPL24/RPLP0/RPL29/TRIM8/RPL15/PSMC3/RPS18/RPL10A/RPL3/RPS5/RPS4X/POLR2H/RPS23/RPL41/RPS2/RPL11/POLR2E/SSB/RPL35/RPL8/RPL14/RPL37A/MDFIC/POLR2I/RPS9/RPS27A/RPS4Y1/RPL18/RPL23A/RPL6/RPS3A/RPS19/RPL26/RPL19/RPL18A/RPS16/RPL32/RPL12/RPS3/EIF3G/RPL13/POLR2L/RPL35A/POLR2K/RPL36/RPL4/RPL36A/RPS25/RPL13A/RPL17/RPS13/ZFP36/EIF3B/RPL31/EIF3D/RPS17/RPL22
GO:0046034	ATP metabolic process	63/1382	287/17913	2.02053e-14	3.88895e-12	63	NUPR1/ENPP1/FAM20C/AK1/HSPA1B/ZBTB20/NDUFS4/BAD/IGF1/PARK7/HSPA1A/ATP5MC3/NDUFC2/NDUFB4/ATP5PF/COX6C/DNAJC15/LDHA/NDUFB7/NDUFC1/CHCHD10/NDUFB2/NDUFA8/NDUFA5/NDUFS5/NDUFA4/TPI1/NDUFAB1/NDUFA12/STOML2/NDUFB10/ISCU/ATP5MC1/NDUFA13/EIF6/PKM/NDUFB5/ATP5F1C/UQCRQ/NDUFV2/NDUFB6/COX6A1/UQCC3/CYC1/NDUFB8/NDUFA6/HSPA8/PFKP/PGAM1/NDUFA11/NUDT5/ATP5PO/ATP5F1D/NDUFB3/ATP5F1B/ATP5MF/COX7C/ATP5ME/UQCRH/DDIT4/OL…
GO:0050678	regulation of epithelial cell proliferation	63/1382	369/17913	1.69235e-09	1.11957e-07	63	APOE/SPARC/CXCL12/SERPINF1/HTRA1/FGFR1/NUPR1/ID1/CAV1/PTN/FGF7/CDKN1C/MDK/HES1/NR2F2/GJA1/ERRFI1/DLX5/CCND1/NRP2/SFRP1/SULF1/CAV2/BMP5/NFIB/TWIST1/NRP1/SNAI2/YAP1/SOX9/NGFR/LAMC1/LAMB1/INTU/EGFR/ZNF703/DLX6/SIX1/KLF9/TCF7L2/ANG/SAV1/THBS1/CCL2/MAGED1/CD109/JUN/ZFP36L1/TNFSF12/BMPR2/BAD/IGF1/AKT3/MYC/MYDGF/IFT57/MEF2C/CTNNB1/NR4A1/PHB2/NME1/VEGFA/ZFP36
GO:0001667	ameboidal-type cell migration	63/1382	446/17913	2.04967e-06	5.52913e-05	63	DCN/FN1/APOE/SPARC/TIMP1/SERPINF1/CYP1B1/FGFR1/EMP2/ID1/PTN/FGF7/NR2F2/DDR2/NRP2/FOXC2/SMOC2/CYGB/SLIT2/AGT/TWIST1/ANGPT1/NRP1/SOX9/KITLG/PFN2/SASH1/ADGRA2/ENPP2/PTPRG/SYDE1/FAP/DOCK1/RHOB/AKAP12/SPRED1/HSPB1/KANK2/AMOTL1/SDC4/PTK2/ITGB1/ADAMTS9/THBS1/KLF4/ARID5B/JUN/RAB13/ROCK2/TNFSF12/BMPR2/ILK/AKT3/TNS1/MEF2C/CALR/ANGPT2/PLXND1/AAMP/NR4A1/C1QBP/VEGFA/ATP5F1B
GO:0016049	cell growth	63/1382	466/17913	8.72701e-06	0.000180282	63	FN1/APOE/IGFBP5/CXCL12/IGFBP7/IGFBP4/CRYAB/SERPINE2/LRP1/FRZB/MAP1B/GJA1/ENPP1/FHL1/NRP2/SFRP1/SORBS2/MMP14/SLIT2/AGT/LAMB2/CTTN/SLIT3/NDN/NRP1/SOX9/TMEM108/EGFR/EFNA5/DCLK1/RERG/MEG3/IGFBP3/LTBP4/HSPA1B/TNFRSF12A/ITGB1/APP/APBB2/PDLIM5/NET1/CAMK2D/BMPR2/HSP90AB1/SPP1/ILK/IGF1/RYK/DPYSL2/CDKN1A/HSPA1A/EI24/CTNNB1/SPHK1/CLSTN1/RACK1/PHB/NDUFA13/HSP90AA1/VEGFA/INHBA/DNPH1/ENO1
GO:0022604	regulation of cell morphogenesis	62/1382	430/17913	1.23356e-06	3.5492e-05	62	FN1/APOE/SPARC/CXCL12/TPM1/S100A13/FBLN1/LRP1/MAP1B/ID1/PTN/THY1/MDK/NTRK2/EPS8/FERMT2/SDC2/SLIT2/CTTN/PDPN/CDC42EP5/PARVA/DLC1/NRP1/CDC42EP4/CDC42EP1/NGFR/ENPP2/WTIP/PTPRD/BAMBI/WASF3/FBLIM1/DOCK1/EFNA5/SH3D19/SHOX2/ITGA7/ABI2/PTK2/MYO10/TNFRSF12A/S100B/CHN1/PDLIM5/CCL2/PLXNB2/S100A10/MYH10/BMPR2/SPP1/ILK/METRN/RYK/RDX/DPYSL2/CALR/STK25/C1QBP/VEGFA/FLNA/HEXB
GO:0072001	renal system development	61/1382	291/17913	4.57448e-13	5.40859e-11	61	DCN/ACTA2/SERPINF1/ID3/FOXC1/FGFR1/PDGFRB/FBN1/PDGFRA/CDKN1C/HES1/ADAMTS1/NOTCH3/PGF/SFRP1/SULF1/FOXC2/RBP4/COL4A1/SLIT2/AGT/TNS2/LAMB2/WWTR1/ANGPT1/IRX3/ENPEP/NRP1/YAP1/SOX9/PDGFA/FOXD1/NPNT/SIX1/NFIA/JAG1/NID1/KANK2/EGR1/SDC4/SOX4/PBX1/LZTS2/ARL3/AHI1/PKD1/PDGFD/MAGED1/PCSK5/ARID5B/SMAD5/ILK/ITGA8/SPRY1/MYC/MEF2C/CTNNB1/ANGPT2/SMAD7/TMED10/VEGFA
GO:0019083	viral transcription	60/1382	177/17913	7.84267e-24	3.96198e-21	60	IFITM3/JUN/NUCKS1/RPL5/RPL7A/POLR2F/RPL10/RPL24/RPLP0/RPL29/TRIM8/RPL15/PSMC3/RPS18/RPL10A/RPL3/RPS5/RPS4X/POLR2H/RPS23/RPL41/RPS2/RPL11/POLR2E/RPL35/RPL8/RPL14/RPL37A/MDFIC/POLR2I/RPS9/RPS27A/RPS4Y1/RPL18/RPL23A/RPL6/RPS3A/RPS19/RPL26/RPL19/RPL18A/RPS16/RPL32/RPL12/RPS3/RPL13/POLR2L/RPL35A/POLR2K/RPL36/RPL4/RPL36A/RPS25/RPL13A/RPL17/RPS13/ZFP36/RPL31/RPS17/RPL22
GO:0090287	regulation of cellular response to growth factor stimulus	60/1382	276/17913	1.33672e-13	1.85704e-11	60	DCN/SFRP4/HTRA1/FGFR1/FBN1/CAV1/PMEPA1/CDKN1C/HES1/NBL1/EMILIN1/ASPN/LTBP1/VASN/FAM20C/SFRP1/SULF1/SMOC2/CAV2/TGFB1I1/LOX/SLIT2/AGT/DKK3/ADGRA2/CHRDL1/TMEM108/BAMBI/NEO1/FOXD1/NPNT/ZNF703/GPC1/TWSG1/LTBP4/RUNX2/DAB2/CD63/THBS1/MYO1C/MYOF/ENG/EPN2/CD109/BMPR2/HSP90AB1/ILK/ITGA8/SPRY1/HSPA1A/CTNNB1/ZEB1/SMAD7/RPS27A/UBB/TOB1/STUB1/VEGFA/FAM89B/HSPA5
GO:0046677	response to antibiotic	60/1382	328/17913	2.60576e-10	2.12944e-08	60	COL1A1/CLU/SPARC/ID3/CRYAB/TNC/VCAM1/CYP1B1/BGLAP/PDGFRB/ID1/CDO1/EPS8/CCND1/AXL/RBP4/EFNA5/RHOB/CST3/EGR1/AOC3/ALPL/PAWR/VKORC1/KLF4/BNIP3/ADCY3/PDGFD/SLC1A3/SOD1/NET1/GSN/JUN/PPP2CB/SDF4/BAD/MGMT/CRIP1/SETD7/GSTP1/PARK7/MEF2C/RPL10A/SPHK1/CAPN2/EEF2/RACK1/PHB/STK25/PRDX3/TUFM/HSP90AA1/RPS3/HNRNPA1/KLF2/TXNIP/JAGN1/HSPA5/AHR/EIF4EBP1
GO:0030111	regulation of Wnt signaling pathway	60/1382	341/17913	1.26079e-09	8.54419e-08	60	COL1A1/APOE/SFRP4/IGFBP4/LRP1/FRZB/WIF1/CAV1/PLPP3/IGFBP6/MDK/DLX5/MDFI/SFRP1/SULF1/RBMS3/WWTR1/DKK3/BICC1/SNAI2/YAP1/SOX9/ADGRA2/DAAM2/BAMBI/EGFR/ZNF703/DIXDC1/TCF7L1/DAB2/EGR1/SOX4/TCF7L2/CBY1/PSMB5/APP/LZTS2/CTHRC1/ILK/CTNND1/HIC1/CTNNB1/PSMC3/PSMB6/PSMB1/RACK1/PSMD8/IGFBP2/MDFIC/PSMD2/PSMA3/PSMC5/PSMD3/PSMB7/PSMC1/PSMA2/PSMA1/PSMC4/PSME2/PFDN5
GO:0048545	response to steroid hormone	60/1382	375/17913	4.82682e-08	2.19374e-06	60	COL1A1/SPARC/IGFBP7/SERPINF1/BGLAP/CAV1/PTN/PMEPA1/TFPI/MDK/NR2F2/ERRFI1/CDO1/CCND1/HNMT/SFRP1/TGFB1I1/LOX/SLIT2/SLIT3/RBFOX2/YAP1/PAPPA/EGFR/KLF9/KANK2/PAM/DAB2/PLPP1/ALPL/S100B/THBS1/ENG/THRA/FHL2/FBXO32/ZFP36L1/SPP1/BAD/AKR1C3/CDKN1A/GSTP1/PARK7/CALR/CTNNB1/FOSB/RWDD1/PHB/RAN/NR4A1/FKBP4/IGFBP2/PHB2/ATP1A1/LBH/TXNIP/FOS/ZFP36/DDIT4/EIF4EBP1
GO:1903706	regulation of hemopoiesis	60/1382	468/17913	6.83502e-05	0.000990043	60	MYL9/FOXC1/BGLAP/FBN1/GAS6/PTN/MDK/HES1/SFRP1/AXL/LOX/MMP14/CSF1/RBFOX2/YAP1/KITLG/SCIN/JAG1/MAFB/HSPA1B/PSMB5/THBS1/TMEM176B/TMEM176A/SOD1/JUN/ZFP36L1/BAD/MYC/TOB2/LGALS3/HSPA1A/PRDX2/MEF2C/CTNNB1/PRMT1/PSMC3/PSMB6/PSMB1/ZEB1/GNAS/SMAD7/KLF10/PSMD8/NME1/EIF6/INHBA/PSMD2/PRELID1/PSMA3/PSMC5/PSMD3/PSMB7/PSMC1/PSMA2/PSMA1/FOS/PSMC4/ZFP36/PSME2
GO:0032970	regulation of actin filament-based process	59/1382	341/17913	3.33529e-09	1.99292e-07	59	CXCL12/DSTN/TPM1/LRP1/PDGFRB/ID1/CAV1/PDGFRA/MDK/RHOC/EPS8/FRMD6/SFRP1/PLEKHH2/SLIT2/CTTN/LIMCH1/PDPN/CDC42EP5/PLN/DLC1/NRP1/NCKAP1/PFN2/PDGFA/LMOD1/EPHA3/SCIN/KIRREL1/ANK2/JAM3/EFNA5/DIXDC1/LIMA1/SORBS3/ABI2/PAM/SDC4/MYO1C/GPM6B/S100A10/WASL/GSN/CAMK2D/PHLDB2/ROCK2/ILK/PHPT1/CFL2/FSCN1/RDX/MEF2C/SNX9/ABL2/SRI/ATP2A2/ATP1A1/FLNA/AKAP9
GO:0060537	muscle tissue development	59/1382	392/17913	5.32983e-07	1.73204e-05	59	DCN/COL3A1/IGFBP5/TPM1/LMNA/FOXC1/FGFR1/PDGFRB/COL11A1/NUPR1/CAV1/PDGFRA/NR2F2/GJA1/SGCB/FOXC2/SORBS2/CAV2/BMP5/RBP4/LOX/AGT/TWIST1/PLN/YAP1/SOX9/TBX2/HEY2/SIX1/SHOX2/GPC1/MYLK/EGR1/CBY1/ITGB1/ADAMTS9/S100B/SAV1/ENG/PDLIM5/MYH11/MYH10/YBX3/ATF3/CFL2/ITGA8/MYL6B/IGF1/VAMP5/FLNB/MEF2C/CALR/CTNNB1/EEF2/MEF2A/SMAD7/NDUFV2/VEGFA/FOS
GO:1901652	response to peptide	59/1382	491/17913	0.00044528	0.00464037	59	COL1A1/SPARC/IGFBP5/CXCL12/TIMP1/LRP1/VCAM1/RARRES2/BGLAP/MAP1B/FBN1/MMP2/ID1/CAV1/GJA1/LPL/ERRFI1/CDO1/ENPP1/FOXC2/CAV2/AGT/PLN/PDK4/NGFR/GHR/TIMP4/JAG1/EGR1/PTK2/BACE1/VIM/APP/MYO1C/LEPROT/KLF4/ADCY3/ZFP36L1/RAB13/ROCK2/NUCKS1/IGF1/GSTP1/SHC1/CHMP5/FIS1/AHCYL1/INSIG2/PHB/KLF10/NR4A1/USO1/EIF6/CYC1/KLF2/HADHA/EIF2B1/EIF4EBP1/APRT
GO:0001822	kidney development	58/1382	276/17913	1.54728e-12	1.59227e-10	58	DCN/ACTA2/SERPINF1/ID3/FOXC1/FGFR1/PDGFRB/FBN1/PDGFRA/CDKN1C/HES1/ADAMTS1/NOTCH3/PGF/SFRP1/SULF1/FOXC2/SLIT2/AGT/TNS2/LAMB2/WWTR1/ANGPT1/IRX3/ENPEP/NRP1/YAP1/SOX9/PDGFA/FOXD1/NPNT/SIX1/JAG1/NID1/KANK2/EGR1/SDC4/SOX4/PBX1/LZTS2/ARL3/AHI1/PKD1/PDGFD/MAGED1/PCSK5/ARID5B/SMAD5/ILK/ITGA8/SPRY1/MYC/MEF2C/CTNNB1/ANGPT2/SMAD7/TMED10/VEGFA
GO:0001101	response to acid chemical	58/1382	330/17913	2.48288e-09	1.49971e-07	58	COL1A1/COL1A2/COL3A1/SPARC/IGFBP7/SERPINF1/ID3/COL6A1/TNC/COL5A2/PDGFRB/MMP2/PTN/PDGFRA/GJA1/LPL/NTRK2/CDO1/SFRP1/RBP4/COL4A1/PDK4/AKR1C1/YAP1/COL16A1/SOX9/AKR1C2/MAPK10/EPHA3/PTGFR/EGFR/SIX1/CD9/EGR1/PDGFC/COL18A1/KLF4/PDGFD/GSN/BAD/AKR1C3/MGMT/GSTP1/RRAGA/FIS1/ZEB1/CAPN2/EEF2/INSIG2/ABL2/IGFBP2/PHB2/YES1/NME1/NDUFA13/VEGFA/TOMM20/KLF2
GO:0042326	negative regulation of phosphorylation	58/1382	455/17913	0.000105116	0.00143169	58	APOE/FBLN1/TIMP3/NUPR1/CAV1/PMEPA1/THY1/PLPP3/CDKN1C/NR2F2/EMILIN1/ERRFI1/ENPP1/RGS3/SFRP1/SLIT2/WWTR1/NDRG2/TWIST1/ANGPT1/PTPN13/CAMK2N1/KIRREL1/GPRC5A/PARD3/IGFBP3/SPRED1/HSPB1/SOCS3/ENG/KLF4/GADD45B/CD109/DYNLL1/JUN/ATF3/ILK/DUSP14/ADARB1/SPRY1/MYC/CDKN1A/GSTP1/PARK7/NPM1/DNAJC15/RACK1/COX11/SMAD7/PHB/CALM2/PRDX3/HEXIM1/RTRAF/INHBA/DNAJA1/GADD45A/DDIT4
GO:0034330	cell junction organization	57/1382	277/17913	5.94292e-12	5.79382e-10	57	FN1/APOD/LRP1/CDH11/CAV1/THY1/RHOC/GJA1/CD151/FERMT2/SFRP1/MMP14/AGT/CTTN/LIMCH1/DLC1/TJP1/NRP1/SNAI2/COL16A1/LAMC1/TRIP6/EPHA3/FBLIM1/ZNF703/ANK2/EFNA5/PARD3/RASSF8/CD9/CADM1/SDC4/PTK2/ANG/THBS1/MYO1C/GPM6B/S100A10/SNAI1/AFDN/PHLDB2/RAB13/NECTIN2/ROCK2/CTNNA1/ILK/CTNND1/PLEC/FSCN1/RDX/ARL2/TNS1/CTNNB1/SMAD7/VEGFA/FLNA/ACTG1
GO:0007409	axonogenesis	57/1382	393/17913	2.73232e-06	6.9649e-05	57	FN1/APOE/CXCL12/LRP1/MAP1B/CDH11/THY1/ENAH/CHL1/NTRK2/DLX5/NCAM1/NRP2/SLIT2/NFIB/LAMB2/CTTN/SLIT3/NDN/UNC5B/NRP1/NGFR/FLRT2/NEO1/BOC/FOXD1/NTN4/EFNA5/DCLK1/PARD3/GFRA1/SHOX2/GPC1/FEZ1/PTK2/TNFRSF12A/ITGB1/C12orf57/S100B/APP/STXBP1/CHN1/APBB2/MYH10/BMPR2/HSP90AB1/SPP1/ILK/METRN/ADARB1/RYK/DPYSL2/SHC1/RPL24/STK25/HSP90AA1/VEGFA
GO:0048732	gland development	57/1382	422/17913	2.37181e-05	0.000409322	57	IGFBP5/SERPINF1/SERPINE2/TNC/FOXC1/FRZB/FGFR1/ID4/CAV1/PTN/FGF7/PDGFRA/CDKN1C/MDK/HES1/GJA1/CDO1/CCND1/SFRP1/SULF1/NFIB/CSF1/DKK3/NRP1/SNAI2/SOX9/TBX2/ALDH1A3/PDGFA/EGFR/NTN4/ZNF703/SIX1/MAFB/CST3/PAM/TWSG1/PBX1/PKD1/ARID5B/SOD1/JUN/LMO4/MGMT/CRIP1/PRDX2/CTNNB1/PLXND1/ARHGAP5/FKBP4/PHB2/NME1/PKM/TGM2/VEGFA/LBH/APRT
GO:0000956	nuclear-transcribed mRNA catabolic process	56/1382	197/17913	2.88477e-18	8.90594e-16	56	ZFP36L1/NT5C3B/RPL5/RPL7A/NBDY/RPL10/RPL24/RPLP0/RPL29/RPL15/RPS18/RPL10A/RPL3/RPS5/RPS4X/RPS23/RPL41/RPS2/RPL11/SSB/RPL35/RPL8/RPL14/RPL37A/RPS9/RPS27A/RPS4Y1/RPL18/RPL23A/RPL6/RPS3A/TOB1/RPS19/RPL26/RPL19/RPL18A/RPS16/RPL32/RPL12/RPS3/RPL13/RPL35A/LSM2/LSM3/RPL36/RPL4/RPL36A/RPS25/RPL13A/RPL17/LSM5/RPS13/ZFP36/RPL31/RPS17/RPL22
GO:0071559	response to transforming growth factor beta	56/1382	239/17913	3.13909e-14	5.28604e-12	56	COL1A1/COL1A2/COL3A1/HTRA1/FMOD/FBN1/ID1/CAV1/PMEPA1/CDKN1C/EMILIN1/LTBP2/FERMT2/ASPN/ZFHX3/ITGB5/LTBP1/VASN/SFRP1/CAV2/TGFB1I1/LOX/MXRA5/COL4A2/DKK3/SOX9/BAMBI/NPNT/ZNF703/PARD3/TWSG1/LTBP4/DAB2/PTK2/THBS1/ENG/PDGFD/CD109/SMAD5/JUN/ZFP36L1/ROCK2/HSP90AB1/ITGA8/PDCD5/HSPA1A/MEF2C/ZEB1/SMAD7/RPS27A/UBB/YES1/STUB1/FAM89B/HSPA5/FOS
GO:0052547	regulation of peptidase activity	56/1382	398/17913	8.42262e-06	0.000174644	56	FN1/TIMP1/PCOLCE/CRYAB/FBLN1/COL6A3/TIMP3/GAS6/CAV1/TFPI/BEX3/A2M/RCN3/DLC1/ITIH5/NGFR/ANTXR1/CST3/ASPH/PCOLCE2/CRIM1/APP/THBS1/PEBP1/KLF4/TIMP2/CD109/GSN/ROCK2/YWHAE/BAD/MYC/MGMT/PDCD5/PARK7/IFT57/MTCH1/FAM162A/FIS1/DAP/RPS27L/RACK1/IFI16/HSPE1/SERPINB6/ARL6IP5/PRDX3/HSPD1/NDUFA13/VEGFA/RPS3/IFI6/PRELID1/PSMA3/UBXN1/CYCS
GO:1901342	regulation of vasculature development	56/1382	425/17913	5.59948e-05	0.000838714	56	DCN/SPARC/SERPINF1/ANGPTL4/FOXC1/CYP1B1/EMP2/ID1/PTN/MDK/S100A1/EMILIN1/RRAS/SFRP1/SULF1/FOXC2/SMOC2/AGT/TWIST1/COL4A2/HSPG2/NRP1/NGFR/SASH1/ADGRA2/ENPP2/HEY2/THBS2/HSPB6/PTGIS/GPNMB/RHOB/SPRED1/HSPB1/EGR1/TNFRSF12A/ITGB1/ADAMTS9/THBS1/ENG/KLF4/EPN2/PDGFD/ROCK2/TNFSF12/RNH1/AKT3/MYDGF/CTNNB1/ANGPT2/SPHK1/PLXND1/SARS/PKM/VEGFA/KLF2
GO:0010975	regulation of neuron projection development	56/1382	458/17913	0.000400803	0.00428681	56	FN1/APOE/CXCL12/LGALS1/SERPINF1/LRP1/FGFR1/MAP1B/ID1/PTN/THY1/MDK/PRRX1/PMP22/NTRK2/SDC2/SFRP1/BMP5/SLIT2/AGT/CTTN/DPYSL3/NRP1/NGFR/PTPRD/EPHA3/NDNF/PTPRG/EFNA5/CAMSAP2/SHOX2/ABI2/FEZ1/PTK2/TNFRSF12A/VIM/CHN1/KLF4/PDLIM5/PLXNB2/SCARB2/BMPR2/SPP1/ILK/METRN/RYK/DPYSL2/MEF2C/TMEM106B/STK25/ABL2/FKBP4/ITM2C/NME1/VEGFA/HSPA5
GO:0010038	response to metal ion	55/1382	335/17913	7.22357e-08	3.0878e-06	55	SPARC/MT2A/MT1E/SERPINF1/S100A13/MT1M/SOD3/VCAM1/BGLAP/CAV1/TF/CCND1/CYBRD1/MT1A/S100A16/PLN/KCNMA1/TNFRSF11B/EGFR/PAM/BACE1/CLIC4/MT1X/APP/THBS1/BNIP3/NFE2L1/NDRG1/SOD1/GSN/JUN/CAMK2D/PPP2CB/BAD/AKR1C3/CRIP1/PARK7/MEF2C/CALR/FOSB/MT1F/AHCYL1/SEC31A/CYB5A/MEF2A/IGFBP2/CALM2/ERCC1/JUNB/TXNIP/HSPA5/ATP5F1D/FOS/FUS/ACTG1
GO:0051271	negative regulation of cellular component movement	55/1382	365/17913	1.23906e-06	3.5492e-05	55	DCN/COL3A1/APOE/IGFBP5/CXCL12/TIMP1/SERPINF1/TPM1/FBLN1/APOD/LRP1/CYP1B1/PTN/THY1/NBL1/NR2F2/EMILIN1/RRAS/SFRP1/SULF1/BMP5/CYGB/SLIT2/LIMCH1/DPYSL3/DLC1/NRP1/PFN2/PRKG1/PTPRG/JAG1/RHOB/IGFBP3/SPRED1/CD9/CLIC4/ADAMTS9/THBS1/ENG/KLF4/CCL2/WASL/AFDN/PHLDB2/CTNNA1/ILK/ADARB1/RYK/GSTP1/MIF/MEF2C/CALR/ANGPT2/SMAD7/IFITM1
GO:0040013	negative regulation of locomotion	55/1382	377/17913	3.40311e-06	8.44245e-05	55	DCN/COL3A1/APOE/IGFBP5/CXCL12/TIMP1/SERPINF1/TPM1/FBLN1/APOD/LRP1/CYP1B1/PTN/THY1/NBL1/NR2F2/EMILIN1/RRAS/SFRP1/SULF1/BMP5/CYGB/SLIT2/LIMCH1/DPYSL3/DLC1/NRP1/PFN2/PRKG1/PTPRG/JAG1/RHOB/IGFBP3/SPRED1/CLIC4/ADAMTS9/THBS1/ENG/KLF4/CCL2/WASL/AFDN/PHLDB2/CTNNA1/ILK/ADARB1/RYK/GSTP1/MIF/MEF2C/CALR/TRIM8/ANGPT2/SMAD7/IFITM1
GO:0007264	small GTPase mediated signal transduction	55/1382	465/17913	0.000992954	0.00885689	55	COL1A2/COL3A1/APOE/PDGFRB/RHOC/EPS8/RRAS/A2M/SLIT2/PDPN/CSF1/FARP1/DLC1/NRP1/NCKAP1/KITLG/NGFR/SRGAP1/PSD3/MRAS/SYDE1/ARHGEF17/DOCK1/RERG/RHOB/ABI2/KANK2/RIN2/ITGB1/SRGAP3/ARL3/CHN1/TIMP2/ARHGAP21/RRAD/NET1/JUN/ROCK2/HACD3/PPP2CB/ARHGAP10/ARHGEF12/FAM13A/CTNNAL1/IGF1/RDX/YWHAQ/CDKN1A/PARK7/SHC1/ARHGAP5/ABL2/USO1/SQSTM1/RALA
GO:0009991	response to extracellular stimulus	55/1382	498/17913	0.00446688	0.0288633	55	COL1A1/APOE/SPARC/TNC/VCAM1/BGLAP/MAP1B/GAS6/FSTL1/PTN/LPL/CCND1/SFRP1/AXL/PDK4/SNAI2/SSTR2/TNFRSF11B/EGFR/CST3/KANK2/ALPL/NENF/COMT/SOD1/GSN/JUN/ATF3/BMPR2/SPP1/DAD1/AKR1C3/MGMT/CDKN1A/GSTP1/RRAGA/FIS1/DAP/DNAJC15/EEF2/IFI16/KLF10/IGFBP2/PKM/RPS19/ERCC1/HSPA8/HNRNPA1/TXN2/HSPA5/HSP90B1/FOS/EIF2A/ZFP36/EIF4EBP1
GO:0070972	protein localization to endoplasmic reticulum	54/1382	128/17913	5.75277e-27	4.56688e-24	54	ANK2/RPL5/RPL7A/RPL10/RPL24/RPLP0/RPL29/RPL15/RPS18/RPL10A/RPL3/RPS5/RPS4X/RPS23/RPL41/SEC61G/RPS2/RPL11/OS9/RPL35/RPL8/RPL14/RPL37A/SRP14/SSR3/RPS9/RPS27A/RPS4Y1/RPL18/RPL23A/RPL6/RPS3A/RPS19/RPL26/RPL19/RPL18A/RPS16/RPL32/RPL12/RPS3/RPL13/RPL35A/HSPA5/PPP1R15A/RPL36/RPL4/RPL36A/RPS25/RPL13A/RPL17/RPS13/RPL31/RPS17/RPL22
GO:0006612	protein targeting to membrane	54/1382	167/17913	1.71687e-20	5.96289e-18	54	PARD3/MYO1C/RPL5/RPL7A/RPL10/RPL24/RPLP0/FIS1/RPL29/RPL15/RPS18/RPL10A/RPL3/RPS5/RPS4X/RPS23/RPL41/RPS2/RPL11/RPL35/RPL8/RPL14/RPL37A/SRP14/SSR3/RPS9/RPS27A/RPS4Y1/RPL18/RPL23A/RPL6/RPS3A/RPS19/RPL26/RPL19/RPL18A/RPS16/RPL32/RPL12/RPS3/RPL13/SSR2/RPL35A/HSPA5/RPL36/RPL4/RPL36A/RPS25/RPL13A/RPL17/RPS13/RPL31/RPS17/RPL22
GO:0001649	osteoblast differentiation	54/1382	222/17913	1.72338e-14	3.54698e-12	54	COL1A1/IBSP/IGFBP5/ID3/COL6A1/TNC/BGLAP/ID4/ID1/GJA1/MRC2/DDR2/DLX5/PTH1R/FAM20C/SFRP1/LOX/WWTR1/TWIST1/SATB2/TMEM119/SNAI2/NPNT/SHOX2/GPNMB/JAG1/IGFBP3/TWSG1/RUNX2/PTK2/IL6ST/ALPL/VCAN/CEBPD/SNAI1/SMAD5/RRBP1/CTHRC1/BMPR2/ILK/IGF1/BCAP29/TPM4/MEF2C/ATRAID/CTNNB1/GNAS/PHB/HSPE1/IFITM1/TOB1/JUNB/RSL1D1/ATP5F1B
GO:0061448	connective tissue development	54/1382	243/17913	8.89402e-13	9.32529e-11	54	COL1A1/MGP/LUM/ACTA2/TIMP1/SNORC/SELENOM/FRZB/FGFR1/PDGFRB/ACAN/COL11A1/ID4/MDK/PRRX1/SERPINH1/PTH1R/COL5A1/CTSK/EFEMP1/SULF1/FOXC2/BMP5/LOX/NFIB/SATB2/CSF1/SNAI2/SOX9/SCIN/FOXD1/FGFR3/COL27A1/SHOX2/TGFBI/RUNX2/EGR1/COMP/THRA/PKD1/PDGFD/SNAI1/ARID5B/SMAD5/BMPR2/TRPS1/CRIP1/MEF2C/TRIP11/CTNNB1/COL2A1/ZEB1/GNAS/UBB
GO:0042176	regulation of protein catabolic process	54/1382	354/17913	1.05177e-06	3.12549e-05	54	CLU/APOE/TIMP1/SERPINE2/LRP1/TIMP3/NUPR1/CAV1/GJA1/SOX9/EGFR/SH3D19/MAP1A/CST3/DAB2/ANXA2/PTK2/CD81/PKD1/LAPTM4B/NFE2L1/TNFSF12/HSP90AB1/RDX/PTTG1IP/MAGEF1/RPL5/PARK7/HSPA1A/ATRAID/PSMC3/SNX9/ERLEC1/RACK1/CAMLG/SMAD7/PHB/EEF1A1/RPL11/OS9/UBB/NDUFA13/NOP53/SNRNP70/HSP90AA1/STUB1/PSMD2/FLNA/PSMC5/PSMD3/PSMC1/UBXN1/SUMO2/PSMC4
GO:0014706	striated muscle tissue development	54/1382	376/17913	6.66007e-06	0.000145137	54	DCN/TPM1/LMNA/FOXC1/FGFR1/PDGFRB/COL11A1/NUPR1/CAV1/PDGFRA/NR2F2/GJA1/SGCB/FOXC2/SORBS2/CAV2/BMP5/RBP4/LOX/AGT/TWIST1/PLN/YAP1/TBX2/HEY2/SIX1/SHOX2/GPC1/EGR1/CBY1/ITGB1/ADAMTS9/S100B/SAV1/ENG/PDLIM5/MYH11/MYH10/YBX3/ATF3/CFL2/MYL6B/IGF1/VAMP5/FLNB/MEF2C/CALR/CTNNB1/EEF2/MEF2A/SMAD7/NDUFV2/VEGFA/FOS
GO:0045785	positive regulation of cell adhesion	54/1382	388/17913	1.66214e-05	0.000308913	54	IBSP/FN1/CXCL12/LGALS1/TPM1/CCDC80/VCAM1/EMP2/CAV1/PTN/THY1/PLPP3/MDK/HES1/EDIL3/ZFHX3/COL8A1/SFRP1/FOXC2/ABI3BP/SMOC2/PDPN/CSF1/ANGPT1/NRP1/COL16A1/NDNF/NPNT/DOCK1/CD276/NID1/SDC4/CD81/MYO10/IL6ST/ITGAV/CCL2/S100A10/AFDN/ILK/BAD/IGF1/ARL2/KIFAP3/CALR/SMAD7/IGFBP2/YES1/HSPD1/TGM2/C1QBP/VEGFA/FLNA/RPS3
GO:0007517	muscle organ development	54/1382	403/17913	4.79758e-05	0.000736468	54	DCN/COL3A1/TAGLN/TPM1/ID3/CRYAB/FOXC1/COL6A3/FGFR1/COL11A1/NUPR1/CAV1/NR2F2/GJA1/FHL1/ZFHX3/SGCB/FOXC2/CAV2/RBP4/LOX/TWIST1/YAP1/TBX2/SGCE/MRAS/HEY2/SIX1/SHOX2/ITGA7/GPC1/SMTN/MYLK/EGR1/COPRS/S100B/SAV1/ENG/ARID5B/YBX3/ATF3/CFL2/MYL6B/IGF1/VAMP5/ADARB1/FLNB/MEF2C/CTNNB1/EEF2/MEF2A/SMAD7/SRI/FOS
GO:0062012	regulation of small molecule metabolic process	54/1382	439/17913	0.000436304	0.00456599	54	APOE/IGFBP5/IGFBP4/LEPR/NUPR1/CAV1/PTH1R/ENPP1/C1QTNF1/BMP5/TWIST1/PDK4/DKK3/SNAI2/IGFBP3/EGR1/PSMB5/PHLDA2/NFE2L1/COMT/SNAI1/SOD1/ZBTB20/ACADVL/BAD/IGF1/AKR1C3/FAM3C/PARK7/PSMC3/PSMB6/DNAJC15/PSMB1/INSIG2/COX11/RAN/PSMD8/MBTPS1/ISCU/EIF6/PSMD2/PSMA3/PSMC5/PGAM1/PSMD3/PSMB7/PSMC1/PSMA2/PSMA1/FDPS/PSMC4/DDIT4/PSME2/ENO1
GO:0034248	regulation of cellular amide metabolic process	54/1382	452/17913	0.000872434	0.00792747	54	CLU/APOE/IGFBP5/RBMS3/DIO2/PDK4/LARP6/HSPB1/SOX4/ANG/VIM/APP/THBS1/SAMD4A/YBX3/ZFP36L1/ROCK2/TNFRSF1A/PURA/IGF1/RPL5/NPM1/CALR/RPL10/SPHK1/RPS27L/CIRBP/RPS4X/EEF2/RACK1/EIF4A2/EEF1A1/TMED10/EIF5A/EIF6/DDX1/PA2G4/SNRNP70/TOB1/RPL26/C1QBP/NCL/RPS3/EIF5B/PGAM1/HNRNPR/PPP1R15A/RPL13A/EIF2A/ZFP36/EIF3B/EIF3D/RPL22/EIF4EBP1
GO:0071560	cellular response to transforming growth factor beta stimulus	53/1382	233/17913	5.438e-13	6.29562e-11	53	COL1A1/COL1A2/COL3A1/HTRA1/FMOD/FBN1/ID1/CAV1/PMEPA1/CDKN1C/EMILIN1/LTBP2/FERMT2/ASPN/ITGB5/LTBP1/VASN/SFRP1/CAV2/TGFB1I1/LOX/COL4A2/DKK3/SOX9/BAMBI/NPNT/ZNF703/PARD3/TWSG1/LTBP4/DAB2/PTK2/THBS1/ENG/PDGFD/CD109/SMAD5/JUN/ZFP36L1/HSP90AB1/ITGA8/PDCD5/HSPA1A/MEF2C/ZEB1/SMAD7/RPS27A/UBB/YES1/STUB1/FAM89B/HSPA5/FOS
GO:0060070	canonical Wnt signaling pathway	53/1382	311/17913	3.52967e-08	1.6909e-06	53	COL1A1/APOE/SFRP4/IGFBP4/FRZB/CAV1/PLPP3/IGFBP6/MDK/DLX5/SFRP1/RBMS3/FZD8/WWTR1/DKK3/BICC1/SNAI2/YAP1/SOX9/ADGRA2/DAAM2/BAMBI/EGFR/ZNF703/DIXDC1/DAB2/EGR1/SOX4/TCF7L2/PSMB5/LZTS2/KLF4/CTHRC1/ILK/CTNND1/RYK/CTNNB1/PSMC3/PSMB6/PSMB1/PSMD8/IGFBP2/PSMD2/PSMA3/PSMC5/PSMD3/PSMB7/PSMC1/PSMA2/PSMA1/PSMC4/PSME2/PFDN5
GO:0006936	muscle contraction	53/1382	343/17913	8.83789e-07	2.65471e-05	53	CALD1/TPM2/ACTA2/MYL9/TPM1/CRYAB/CAV1/SSPN/FXYD1/GJA1/ITGB5/SULF1/AGT/CTTN/PLN/SSTR2/LMOD1/EDNRA/KCNMA1/PRKG1/NPNT/HSPB6/PDE5A/ANK2/SMTN/SORBS3/MYLK/ITGA1/ASPH/COMP/VIM/C12orf57/MYOF/MYH11/VEGFB/SMAD5/SOD1/CAMK2D/ROCK2/GUCY1A1/MYL6B/TPM4/SPHK1/EEF2/SMAD7/HSBP1/SRI/CALM2/ATP2A2/GSTO1/ATP1A1/FLNA/ENO1
GO:0010498	proteasomal protein catabolic process	53/1382	382/17913	2.16442e-05	0.000383047	53	CLU/APOE/NUPR1/CAV1/RCN3/WWTR1/MAP1A/DAB2/PSMB5/PKD1/NFE2L1/HSP90AB1/PPP2CB/PARK7/HSPA1A/IFI27/CTNNB1/PSMC3/PSMB6/ERLEC1/PSMB1/RACK1/SKP1/CAMLG/ANAPC11/SMAD7/PSMD8/RPL11/OS9/SPOP/RPS27A/UBB/NOP53/STUB1/PSMD2/PCNP/PSMA3/PSMC5/PSMD3/PSMB7/PSMC1/PSMA2/HSPA5/RNF5/UBXN1/PSMA1/HSP90B1/SEC61B/CDC26/SUMO2/PSMC4/PSME2/SDF2L1
GO:0045765	regulation of angiogenesis	53/1382	383/17913	2.32831e-05	0.000403066	53	DCN/SPARC/SERPINF1/ANGPTL4/FOXC1/CYP1B1/EMP2/ID1/PTN/MDK/S100A1/EMILIN1/RRAS/SFRP1/SULF1/FOXC2/SMOC2/AGT/TWIST1/COL4A2/HSPG2/NRP1/NGFR/SASH1/ADGRA2/ENPP2/THBS2/HSPB6/PTGIS/GPNMB/RHOB/SPRED1/HSPB1/TNFRSF12A/ITGB1/ADAMTS9/THBS1/ENG/KLF4/EPN2/ROCK2/TNFSF12/RNH1/AKT3/MYDGF/CTNNB1/ANGPT2/SPHK1/PLXND1/SARS/PKM/VEGFA/KLF2
GO:0002521	leukocyte differentiation	53/1382	485/17913	0.00638961	0.0382867	53	LGALS1/LEPR/VCAM1/BGLAP/FBN1/GAS6/MDK/RRAS/FAM20C/SFRP1/TMEM98/AXL/MMP14/FZD8/CSF1/KITLG/SH3PXD2A/MAFB/RUNX2/EGR1/ANXA2/CD81/SOX4/LTBR/ITGB1/APP/TMEM176B/TMEM176A/CD109/SOD1/JUN/ZFP36L1/BAD/MYC/TOB2/KDELR1/PRDX2/MEF2C/CTNNB1/ZEB1/GNAS/IFI16/GLO1/SMAD7/KLF10/NME1/JUNB/VEGFA/INHBA/PRELID1/JAGN1/FOS/RPL22
GO:0007160	cell-matrix adhesion	52/1382	214/17913	5.52443e-14	8.07875e-12	52	FN1/COL3A1/APOD/LRP1/VCAM1/EMP2/THY1/EMILIN1/FERMT2/ITGB5/SFRP1/MMP14/ECM2/ITGA10/CTTN/LIMCH1/CSF1/DLC1/NRP1/EPDR1/COL16A1/COL5A3/TRIP6/EPHA3/SGCE/SNED1/PPFIA2/NPNT/COL13A1/JAM3/EFNA5/ITGA7/JAG1/NID1/ITGA1/SDC4/PTK2/CD63/ITGB1/ADAMTS9/ITGAV/THBS1/GPM6B/PKD1/S100A10/PHLDB2/ROCK2/ILK/ITGA8/BCAM/CTNNB1/VEGFA
GO:2000027	regulation of animal organ morphogenesis	52/1382	250/17913	3.31763e-11	2.92636e-09	52	FOXC1/FGFR1/PTN/FGF7/MDK/HES1/CHAD/ASPN/SFRP1/SULF1/FOXC2/AGT/NFIB/TWIST1/CSF1/SNAI2/SOX9/TBX2/PDGFA/TNFRSF11B/NTN4/SIX1/JAG1/RUNX2/DAB2/PSMB5/ENG/AHI1/MAGED1/CTHRC1/BMPR2/SPRY1/MYC/RYK/CTNNB1/PSMC3/PSMB6/PSMB1/PSMD8/PHB2/VEGFA/PSMD2/AP2M1/PSMA3/PSMC5/PSMD3/PSMB7/PSMC1/PSMA2/PSMA1/PSMC4/PSME2
GO:0015980	energy derivation by oxidation of organic compounds	52/1382	264/17913	2.69177e-10	2.16785e-08	52	LEPR/CAVIN3/ENPP1/GFPT2/IL6ST/PHLDA2/BNIP3/NDUFS4/ACADVL/IGF1/MYC/PARK7/NDUFC2/NDUFB4/COX6C/DNAJC15/NDUFAF2/SDHD/NDUFB7/ETFB/NDUFC1/GNAS/NDUFB2/NDUFA8/NDUFA5/NDUFS5/NDUFA4/NDUFAB1/NDUFA12/NDUFB10/ISCU/MDH2/NDUFA13/NOP53/NDUFB5/UQCRQ/NDUFV2/NDUFB6/COX6A1/UQCC3/CYC1/NDUFB8/NDUFA6/PRELID1/NDUFA11/ATP5F1D/NDUFB3/COX7C/UQCRH/IDH3G/UQCRB/CYCS
GO:0045862	positive regulation of proteolysis	52/1382	333/17913	8.06704e-07	2.43634e-05	52	CLU/FN1/APOE/PCOLCE/FBLN1/NUPR1/CAV1/BEX3/RCN3/MMP14/DLC1/NGFR/ANTXR1/SH3D19/DAB2/ASPH/PCOLCE2/PTK2/APP/GSN/ROCK2/BAD/MYC/MAGEF1/PDCD5/HSPA1A/IFT57/MTCH1/FAM162A/FIS1/PSMC3/SNX9/DAP/RPS27L/RACK1/IFI16/SMAD7/PHB/HSPE1/ARL6IP5/HSPD1/NDUFA13/NOP53/STUB1/RPS3/PRELID1/PSMC5/PSMC1/SUMO2/PSMC4/ENO1/CYCS
GO:2000146	negative regulation of cell motility	52/1382	347/17913	2.83313e-06	7.15622e-05	52	DCN/COL3A1/APOE/IGFBP5/CXCL12/TIMP1/SERPINF1/TPM1/FBLN1/APOD/LRP1/CYP1B1/PTN/THY1/NBL1/NR2F2/EMILIN1/RRAS/SFRP1/SULF1/BMP5/CYGB/SLIT2/LIMCH1/DPYSL3/DLC1/PFN2/PRKG1/PTPRG/JAG1/RHOB/IGFBP3/SPRED1/CLIC4/ADAMTS9/THBS1/ENG/KLF4/CCL2/WASL/AFDN/PHLDB2/CTNNA1/ILK/ADARB1/GSTP1/MIF/MEF2C/CALR/ANGPT2/SMAD7/IFITM1
GO:0001933	negative regulation of protein phosphorylation	52/1382	416/17913	0.000377261	0.00408662	52	APOE/FBLN1/TIMP3/CAV1/PMEPA1/THY1/PLPP3/CDKN1C/NR2F2/EMILIN1/ERRFI1/ENPP1/RGS3/SFRP1/SLIT2/WWTR1/NDRG2/TWIST1/ANGPT1/PTPN13/CAMK2N1/KIRREL1/GPRC5A/PARD3/IGFBP3/SPRED1/HSPB1/SOCS3/ENG/KLF4/GADD45B/CD109/JUN/ATF3/ILK/DUSP14/ADARB1/SPRY1/MYC/CDKN1A/GSTP1/PARK7/NPM1/RACK1/SMAD7/PHB/CALM2/HEXIM1/RTRAF/DNAJA1/GADD45A/DDIT4
GO:0090066	regulation of anatomical structure size	52/1382	442/17913	0.00151221	0.0123036	52	FN1/APOE/CXCL12/ACTA2/DSTN/FOXC1/LRP1/MAP1B/CAV1/GJA1/EPS8/FOXC2/PLEKHH2/SLIT2/AGT/CTTN/CDC42EP5/NRP1/NCKAP1/PFN2/LMOD1/EDNRA/KCNMA1/SCIN/PRKG1/KIRREL1/EGFR/EFNA5/LIMA1/ABI2/ITGA1/COMP/TNFRSF12A/MYO1C/SOD1/WASL/GSN/ROCK2/BMPR2/HSP90AB1/SPP1/GUCY1A1/ILK/CFL2/AKT3/RYK/RDX/DPYSL2/SNX9/VEGFA/AP2M1/PPP1R15A
GO:1901987	regulation of cell cycle phase transition	52/1382	464/17913	0.00418464	0.0276834	52	CDKN1C/ADAMTS1/FHL1/CCND1/EGFR/GPNMB/SMARCD3/KANK2/SOX4/PBX1/PSMB5/APP/KLF4/PKD1/CCL2/DYNLL1/ZFP36L1/YWHAE/DYNC1I2/RDX/CDKN1A/NPM1/PRMT1/PSMC3/PSMB6/RPS27L/PSMB1/TUBB/SKP1/ANAPC11/PSMD8/PSMG2/DCTN2/PHB2/TUBA1A/NOP53/HSP90AA1/RPL26/PSMD2/PSMA3/TUBB4B/PSMC5/PSMD3/PSMB7/PSMC1/PSMA2/AKAP9/PSMA1/CDC26/GADD45A/PSMC4/PSME2
GO:0031667	response to nutrient levels	52/1382	466/17913	0.00456037	0.0292632	52	COL1A1/APOE/SPARC/TNC/VCAM1/BGLAP/MAP1B/GAS6/FSTL1/PTN/LPL/CCND1/SFRP1/PDK4/SNAI2/SSTR2/TNFRSF11B/EGFR/CST3/KANK2/ALPL/NENF/COMT/SOD1/GSN/JUN/ATF3/BMPR2/SPP1/DAD1/AKR1C3/MGMT/CDKN1A/GSTP1/RRAGA/FIS1/DAP/DNAJC15/EEF2/IFI16/KLF10/IGFBP2/PKM/ERCC1/HSPA8/HNRNPA1/TXN2/HSPA5/HSP90B1/EIF2A/ZFP36/EIF4EBP1
GO:0002446	neutrophil mediated immunity	52/1382	499/17913	0.0163229	0.076352	52	CST3/PGRMC1/CFD/ANXA2/CD63/CRISPLD2/PRDX4/HSPA1B/ITGAV/CYB5R3/TIMP2/DYNLL1/GSN/CD59/HSP90AB1/GSTP1/LGALS3/MIF/HSPA1A/NDUFC2/PSMC3/PRDX6/PSMB1/CTSB/TUBB/EEF2/METTL7A/PDAP1/EEF1A1/MLEC/SERPINB6/SRP14/PA2G4/PKM/HSP90AA1/IMPDH2/PPIA/PSMD2/HSPA8/HEXB/TNFAIP6/TUBB4B/PGAM1/PSMD3/PSMB7/PSMA2/JAGN1/CCT2/SURF4/DPP7/CCT8/APRT
GO:0045047	protein targeting to ER	51/1382	108/17913	2.10553e-28	3.90014e-25	51	RPL5/RPL7A/RPL10/RPL24/RPLP0/RPL29/RPL15/RPS18/RPL10A/RPL3/RPS5/RPS4X/RPS23/RPL41/SEC61G/RPS2/RPL11/RPL35/RPL8/RPL14/RPL37A/SRP14/SSR3/RPS9/RPS27A/RPS4Y1/RPL18/RPL23A/RPL6/RPS3A/RPS19/RPL26/RPL19/RPL18A/RPS16/RPL32/RPL12/RPS3/RPL13/RPL35A/HSPA5/RPL36/RPL4/RPL36A/RPS25/RPL13A/RPL17/RPS13/RPL31/RPS17/RPL22
GO:0072599	establishment of protein localization to endoplasmic reticulum	51/1382	112/17913	1.84901e-27	1.71249e-24	51	RPL5/RPL7A/RPL10/RPL24/RPLP0/RPL29/RPL15/RPS18/RPL10A/RPL3/RPS5/RPS4X/RPS23/RPL41/SEC61G/RPS2/RPL11/RPL35/RPL8/RPL14/RPL37A/SRP14/SSR3/RPS9/RPS27A/RPS4Y1/RPL18/RPL23A/RPL6/RPS3A/RPS19/RPL26/RPL19/RPL18A/RPS16/RPL32/RPL12/RPS3/RPL13/RPL35A/HSPA5/RPL36/RPL4/RPL36A/RPS25/RPL13A/RPL17/RPS13/RPL31/RPS17/RPL22
GO:0031647	regulation of protein stability	51/1382	272/17913	2.3922e-09	1.46392e-07	51	CLU/CRYAB/LMNA/ID1/PLPP3/TF/PFN2/ANK2/ASPH/CD81/SOX4/HSPA1B/BAG3/SAV1/STXBP1/CRTAP/GSN/HSP90AB1/PPIB/IGF1/RPL5/CDKN1A/PARK7/HSPA1A/CALR/CCT3/DPM3/CAMLG/SMAD7/PHB/RPL11/PTGES3/CCT7/SUGT1/PHB2/PRKRA/HSPD1/NOP53/ISOC2/HSP90AA1/STUB1/CCT4/TCP1/HSPA8/FLNA/CCT6A/RNF5/CCT2/CCT8/TOMM7/CCT5
GO:0090130	tissue migration	51/1382	363/17913	2.18689e-05	0.000384574	51	DCN/APOE/SPARC/ACTA2/SERPINF1/CYP1B1/FGFR1/EMP2/ID1/PTN/FGF7/NR2F2/NRP2/FOXC2/SMOC2/SLIT2/AGT/ANGPT1/NRP1/SOX9/PFN2/SASH1/ADGRA2/ENPP2/PTPRG/FAP/DOCK1/RHOB/SPRED1/HSPB1/KANK2/AMOTL1/PTK2/ITGB1/ADAMTS9/THBS1/KLF4/JUN/RAB13/ROCK2/TNFSF12/BMPR2/AKT3/MEF2C/CALR/ANGPT2/PLXND1/AAMP/NR4A1/VEGFA/ATP5F1B
GO:0043254	regulation of protein complex assembly	51/1382	409/17913	0.000452675	0.00464975	51	CLU/APOE/CRYAB/MAP1B/PMEPA1/RHOC/EPS8/SLIT2/CTTN/TWIST1/CDC42EP5/NCKAP1/PFN2/LMOD1/SCIN/KIRREL1/FBLIM1/HEY2/CAMSAP2/ABI2/HSPA1B/STXBP1/MYO1C/THRA/WASL/GSN/JUN/LMO4/FSCN1/RDX/ARL2/PARK7/NBDY/HSPA1A/CTNNB1/GTF2H5/SNX9/DNAJC15/RACK1/VDAC2/FKBP4/NOP53/HSP90AA1/STUB1/ERCC1/VEGFA/HSPA8/RPS3/AKAP9/RPL13A/EIF4EBP1
GO:1901990	regulation of mitotic cell cycle phase transition	51/1382	428/17913	0.00126625	0.0108213	51	CDKN1C/ADAMTS1/FHL1/CCND1/EGFR/GPNMB/SMARCD3/KANK2/SOX4/PBX1/PSMB5/APP/KLF4/PKD1/CCL2/DYNLL1/ZFP36L1/YWHAE/DYNC1I2/RDX/CDKN1A/PRMT1/PSMC3/PSMB6/RPS27L/PSMB1/TUBB/SKP1/ANAPC11/PSMD8/PSMG2/DCTN2/PHB2/TUBA1A/NOP53/HSP90AA1/RPL26/PSMD2/PSMA3/TUBB4B/PSMC5/PSMD3/PSMB7/PSMC1/PSMA2/AKAP9/PSMA1/CDC26/GADD45A/PSMC4/PSME2
GO:0043312	neutrophil degranulation	51/1382	485/17913	0.0147697	0.0714942	51	CST3/PGRMC1/CFD/ANXA2/CD63/CRISPLD2/PRDX4/HSPA1B/ITGAV/CYB5R3/TIMP2/DYNLL1/GSN/CD59/HSP90AB1/GSTP1/LGALS3/MIF/HSPA1A/NDUFC2/PSMC3/PRDX6/PSMB1/CTSB/TUBB/EEF2/METTL7A/PDAP1/EEF1A1/MLEC/SERPINB6/SRP14/PA2G4/PKM/HSP90AA1/IMPDH2/PPIA/PSMD2/HSPA8/HEXB/TNFAIP6/TUBB4B/PGAM1/PSMD3/PSMB7/PSMA2/CCT2/SURF4/DPP7/CCT8/APRT
GO:0002283	neutrophil activation involved in immune response	51/1382	488/17913	0.0164285	0.0767168	51	CST3/PGRMC1/CFD/ANXA2/CD63/CRISPLD2/PRDX4/HSPA1B/ITGAV/CYB5R3/TIMP2/DYNLL1/GSN/CD59/HSP90AB1/GSTP1/LGALS3/MIF/HSPA1A/NDUFC2/PSMC3/PRDX6/PSMB1/CTSB/TUBB/EEF2/METTL7A/PDAP1/EEF1A1/MLEC/SERPINB6/SRP14/PA2G4/PKM/HSP90AA1/IMPDH2/PPIA/PSMD2/HSPA8/HEXB/TNFAIP6/TUBB4B/PGAM1/PSMD3/PSMB7/PSMA2/CCT2/SURF4/DPP7/CCT8/APRT
GO:0042119	neutrophil activation	51/1382	499/17913	0.0238535	0.101913	51	CST3/PGRMC1/CFD/ANXA2/CD63/CRISPLD2/PRDX4/HSPA1B/ITGAV/CYB5R3/TIMP2/DYNLL1/GSN/CD59/HSP90AB1/GSTP1/LGALS3/MIF/HSPA1A/NDUFC2/PSMC3/PRDX6/PSMB1/CTSB/TUBB/EEF2/METTL7A/PDAP1/EEF1A1/MLEC/SERPINB6/SRP14/PA2G4/PKM/HSP90AA1/IMPDH2/PPIA/PSMD2/HSPA8/HEXB/TNFAIP6/TUBB4B/PGAM1/PSMD3/PSMB7/PSMA2/CCT2/SURF4/DPP7/CCT8/APRT
GO:0006613	cotranslational protein targeting to membrane	50/1382	106/17913	7.65462e-28	1.06342e-24	50	RPL5/RPL7A/RPL10/RPL24/RPLP0/RPL29/RPL15/RPS18/RPL10A/RPL3/RPS5/RPS4X/RPS23/RPL41/RPS2/RPL11/RPL35/RPL8/RPL14/RPL37A/SRP14/SSR3/RPS9/RPS27A/RPS4Y1/RPL18/RPL23A/RPL6/RPS3A/RPS19/RPL26/RPL19/RPL18A/RPS16/RPL32/RPL12/RPS3/RPL13/SSR2/RPL35A/RPL36/RPL4/RPL36A/RPS25/RPL13A/RPL17/RPS13/RPL31/RPS17/RPL22
GO:0034329	cell junction assembly	50/1382	214/17913	8.42838e-13	9.00702e-11	50	FN1/APOD/LRP1/CAV1/THY1/RHOC/GJA1/CD151/FERMT2/SFRP1/MMP14/AGT/CTTN/LIMCH1/DLC1/TJP1/NRP1/SNAI2/COL16A1/LAMC1/TRIP6/EPHA3/FBLIM1/ZNF703/ANK2/EFNA5/PARD3/CD9/SDC4/PTK2/THBS1/MYO1C/GPM6B/S100A10/SNAI1/AFDN/PHLDB2/RAB13/ROCK2/CTNNA1/ILK/PLEC/FSCN1/ARL2/TNS1/CTNNB1/SMAD7/VEGFA/FLNA/ACTG1
GO:1902903	regulation of supramolecular fiber organization	50/1382	313/17913	6.5721e-07	2.09892e-05	50	CLU/APOE/CXCL12/DSTN/TPM1/CRYAB/AEBP1/MAP1B/ID1/RHOC/EMILIN1/EPS8/SFRP1/PLEKHH2/SLIT2/CTTN/LIMCH1/CDC42EP5/DLC1/NRP1/NCKAP1/PFN2/LMOD1/SCIN/KIRREL1/CAMSAP2/LIMA1/SORBS3/ABI2/SDC4/HSPA1B/APP/MYO1C/S100A10/WASL/GSN/PHLDB2/ROCK2/CFL2/RDX/ARL2/PARK7/HSPA1A/MEF2C/SNX9/FKBP4/HSPA8/FLNA/RPS3/AKAP9
GO:0030336	negative regulation of cell migration	50/1382	332/17913	3.79205e-06	9.283e-05	50	DCN/COL3A1/APOE/IGFBP5/CXCL12/TIMP1/SERPINF1/TPM1/APOD/LRP1/CYP1B1/PTN/THY1/NBL1/NR2F2/EMILIN1/RRAS/SFRP1/SULF1/BMP5/CYGB/SLIT2/LIMCH1/DPYSL3/DLC1/PFN2/PRKG1/PTPRG/JAG1/RHOB/IGFBP3/SPRED1/CLIC4/ADAMTS9/THBS1/ENG/KLF4/CCL2/WASL/AFDN/PHLDB2/ILK/ADARB1/GSTP1/MIF/MEF2C/CALR/ANGPT2/SMAD7/IFITM1
GO:0010631	epithelial cell migration	50/1382	354/17913	2.27484e-05	0.000398778	50	DCN/APOE/SPARC/SERPINF1/CYP1B1/FGFR1/EMP2/ID1/PTN/FGF7/NR2F2/NRP2/FOXC2/SMOC2/SLIT2/AGT/ANGPT1/NRP1/SOX9/PFN2/SASH1/ADGRA2/ENPP2/PTPRG/FAP/DOCK1/RHOB/SPRED1/HSPB1/KANK2/AMOTL1/PTK2/ITGB1/ADAMTS9/THBS1/KLF4/JUN/RAB13/ROCK2/TNFSF12/BMPR2/AKT3/MEF2C/CALR/ANGPT2/PLXND1/AAMP/NR4A1/VEGFA/ATP5F1B
GO:0090132	epithelium migration	50/1382	357/17913	2.85268e-05	0.000474621	50	DCN/APOE/SPARC/SERPINF1/CYP1B1/FGFR1/EMP2/ID1/PTN/FGF7/NR2F2/NRP2/FOXC2/SMOC2/SLIT2/AGT/ANGPT1/NRP1/SOX9/PFN2/SASH1/ADGRA2/ENPP2/PTPRG/FAP/DOCK1/RHOB/SPRED1/HSPB1/KANK2/AMOTL1/PTK2/ITGB1/ADAMTS9/THBS1/KLF4/JUN/RAB13/ROCK2/TNFSF12/BMPR2/AKT3/MEF2C/CALR/ANGPT2/PLXND1/AAMP/NR4A1/VEGFA/ATP5F1B
GO:0001558	regulation of cell growth	50/1382	396/17913	0.000383403	0.00414508	50	FN1/APOE/IGFBP5/CXCL12/IGFBP7/IGFBP4/CRYAB/SERPINE2/LRP1/FRZB/MAP1B/GJA1/ENPP1/FHL1/SFRP1/MMP14/SLIT2/AGT/CTTN/SLIT3/NRP1/EGFR/EFNA5/RERG/MEG3/IGFBP3/LTBP4/HSPA1B/TNFRSF12A/APBB2/NET1/CAMK2D/BMPR2/SPP1/ILK/IGF1/RYK/DPYSL2/CDKN1A/HSPA1A/EI24/SPHK1/CLSTN1/RACK1/PHB/NDUFA13/VEGFA/INHBA/DNPH1/ENO1
GO:0019216	regulation of lipid metabolic process	50/1382	402/17913	0.000543023	0.00538853	50	APOE/IGFBP7/ANGPTL4/APOD/RARRES2/PDGFRB/CAV1/PDGFRA/BMP5/AGT/TWIST1/PDK4/DKK3/SNAI2/PDGFA/CCDC3/FGFR3/SMARCD3/GOLM1/EGR1/PTK2/PLPP1/CD81/SOCS3/THRA/KLF4/FHL2/NFE2L1/SNAI1/SOD1/ZBTB20/TNFRSF1A/ACADVL/AKR1C3/CHD9/MTMR2/EDF1/SPHK1/DNAJC15/CAPN2/INSIG2/RACK1/RAN/MBTPS1/STOML2/EIF6/STUB1/ATP1A1/FDPS/PLIN2
GO:0030099	myeloid cell differentiation	50/1382	411/17913	0.000894231	0.00810643	50	MYL9/BGLAP/FBN1/EPAS1/CDKN1C/FAM20C/SFRP1/LOX/CSF1/RBFOX2/KITLG/SCIN/JAG1/SH3PXD2A/MAFB/ANXA2/CD81/LTBR/HSPA1B/APP/THBS1/THRA/NFE2L1/TMEM14C/CD109/SMAD5/JUN/ZFP36L1/MYC/TOB2/LGALS3/HSPA1A/MEF2C/CTNNB1/PRMT1/GNAS/IFI16/GLO1/KLF10/PRDX3/NME1/EIF6/RPS19/JUNB/VEGFA/INHBA/KLF2/JAGN1/FOS/ZFP36
GO:0071900	regulation of protein serine/threonine kinase activity	50/1382	479/17913	0.0177342	0.0821242	50	APOE/FGFR1/PDGFRB/CAV1/THY1/CDKN1C/NR2F2/CCND1/RGS3/SFRP1/FZD8/KITLG/SASH1/MAPK10/GHR/PDGFA/EGFR/PDE5A/CSPG4/SPRED1/HSPB1/ITGA1/CD81/THBS1/SERTAD1/GADD45B/PKD1/MAGED1/SOD1/HACD3/HSP90AB1/ILK/MAP3K20/DUSP14/IGF1/CDKN1A/GSTP1/MIF/PRDX2/SHC1/PEA15/MDFIC/CALM2/HEXIM1/RPS27A/UBB/VEGFA/RPS3/DNAJA1/GADD45A
GO:0006614	SRP-dependent cotranslational protein targeting to membrane	49/1382	103/17913	1.58711e-27	1.71249e-24	49	RPL5/RPL7A/RPL10/RPL24/RPLP0/RPL29/RPL15/RPS18/RPL10A/RPL3/RPS5/RPS4X/RPS23/RPL41/RPS2/RPL11/RPL35/RPL8/RPL14/RPL37A/SRP14/SSR3/RPS9/RPS27A/RPS4Y1/RPL18/RPL23A/RPL6/RPS3A/RPS19/RPL26/RPL19/RPL18A/RPS16/RPL32/RPL12/RPS3/RPL13/RPL35A/RPL36/RPL4/RPL36A/RPS25/RPL13A/RPL17/RPS13/RPL31/RPS17/RPL22
GO:0032956	regulation of actin cytoskeleton organization	49/1382	297/17913	3.17664e-07	1.11725e-05	49	CXCL12/DSTN/TPM1/LRP1/PDGFRB/ID1/PDGFRA/MDK/RHOC/EPS8/SFRP1/PLEKHH2/SLIT2/CTTN/LIMCH1/CDC42EP5/DLC1/NRP1/NCKAP1/PFN2/PDGFA/LMOD1/EPHA3/SCIN/KIRREL1/JAM3/EFNA5/DIXDC1/LIMA1/SORBS3/ABI2/PAM/SDC4/MYO1C/GPM6B/S100A10/WASL/GSN/PHLDB2/ROCK2/ILK/PHPT1/CFL2/FSCN1/RDX/MEF2C/SNX9/ABL2/FLNA
GO:0060562	epithelial tube morphogenesis	49/1382	313/17913	1.5452e-06	4.29334e-05	49	TNC/MDK/HES1/GJA1/PGF/SFRP1/FOXC2/BMP5/MMP14/COL4A1/SLIT2/AGT/TWIST1/CSF1/IRX3/DLC1/NRP1/YAP1/SOX9/TBX2/EDNRA/FOXD1/NPNT/SIX1/RHOB/SDC4/SOX4/CLIC4/PBX1/TULP3/LZTS2/ENG/AHI1/PKD1/PLXNB2/MAGED1/CTHRC1/ILK/LMO4/SPRY1/MYC/IFT57/MEF2C/CTNNB1/PLXND1/PHB2/RALA/TMED2/VEGFA
GO:0001654	eye development	49/1382	342/17913	1.87051e-05	0.000340865	49	SERPINF1/CRYAB/FOXC1/CYP1B1/COL5A2/PDGFRB/FBN1/PTN/THY1/PDGFRA/CDKN1C/GJA1/NTRK2/COL5A1/COL8A1/EFEMP1/FOXC2/RBP4/COL4A1/LAMB2/TWIST1/NRP1/SOX9/TBX2/CHRDL1/ALDH1A3/FAT1/EGFR/JAG1/SMARCD3/CST3/ABI2/TWSG1/CLIC4/TULP3/VIM/C12orf57/AHI1/KLF4/JUN/MYH10/BMPR2/CTNNB1/RPL24/ZEB1/IMPDH2/VEGFA/INHBA/PFDN5
GO:0150063	visual system development	49/1382	346/17913	2.55074e-05	0.000432148	49	SERPINF1/CRYAB/FOXC1/CYP1B1/COL5A2/PDGFRB/FBN1/PTN/THY1/PDGFRA/CDKN1C/GJA1/NTRK2/COL5A1/COL8A1/EFEMP1/FOXC2/RBP4/COL4A1/LAMB2/TWIST1/NRP1/SOX9/TBX2/CHRDL1/ALDH1A3/FAT1/EGFR/JAG1/SMARCD3/CST3/ABI2/TWSG1/CLIC4/TULP3/VIM/C12orf57/AHI1/KLF4/JUN/MYH10/BMPR2/CTNNB1/RPL24/ZEB1/IMPDH2/VEGFA/INHBA/PFDN5
GO:0048880	sensory system development	49/1382	351/17913	3.71919e-05	0.000587145	49	SERPINF1/CRYAB/FOXC1/CYP1B1/COL5A2/PDGFRB/FBN1/PTN/THY1/PDGFRA/CDKN1C/GJA1/NTRK2/COL5A1/COL8A1/EFEMP1/FOXC2/RBP4/COL4A1/LAMB2/TWIST1/NRP1/SOX9/TBX2/CHRDL1/ALDH1A3/FAT1/EGFR/JAG1/SMARCD3/CST3/ABI2/TWSG1/CLIC4/TULP3/VIM/C12orf57/AHI1/KLF4/JUN/MYH10/BMPR2/CTNNB1/RPL24/ZEB1/IMPDH2/VEGFA/INHBA/PFDN5
GO:0030900	forebrain development	49/1382	371/17913	0.000150472	0.00197211	49	COL3A1/CXCL12/LRP1/FGFR1/ID4/CRTAC1/PTN/MDK/HES1/NR2F2/NOTCH3/NTRK2/DLX5/NRP2/AXL/SLIT2/NFIB/SATB2/GNG12/DLC1/NRP1/ALDH1A3/SSTR2/TMEM108/LAMB1/PRKG1/DYNC2H1/EGFR/DCLK1/DIXDC1/TWSG1/FEZ1/C12orf57/MYO1D/APP/BNIP3/MYH10/YWHAE/BAD/DPCD/RYK/SUN1/CTNNB1/RAN/UBB/NME1/UQCRQ/INHBA/FLNA
GO:0043900	regulation of multi-organism process	49/1382	408/17913	0.00132082	0.0111717	49	APOE/IFITM3/LGALS1/TIMP1/HTRA1/CAV1/CAV2/SASH1/SYDE1/PDE5A/ANXA2/PRDX4/ITGAV/STXBP1/GSN/JUN/NECTIN2/HACD3/NUCKS1/PPIB/BAD/IGF1/ADARB1/MIF/PRDX2/POLR2F/IFI27/CALR/BANF1/TRIM8/PSMC3/POLR2H/IFI16/POLR2E/MDFIC/OPTN/POLR2I/SQSTM1/IFITM1/NOP53/MPHOSPH8/C1QBP/INHBA/PPIA/HSPA8/P4HB/POLR2L/POLR2K/ZFP36
GO:0002683	negative regulation of immune system process	49/1382	451/17913	0.00942767	0.0514632	49	COL3A1/CXCL12/HTRA1/SERPING1/APOD/FBN1/THY1/MDK/HES1/NBL1/EMILIN1/A2M/SFRP1/AXL/BMP5/SLIT2/ANGPT1/SOX9/KITLG/PDE5A/GPNMB/MAFB/TWSG1/SDC4/PAWR/THBS1/TMEM176B/TMEM176A/CCL2/WASL/CD59/ZFP36L1/PHPT1/MYC/TOB2/LGALS3/MIF/PRDX2/CTNNB1/PRMT1/IFI16/CUEDC2/SMAD7/NME1/RPS19/C1QBP/INHBA/PSMA1/ZFP36
GO:0050769	positive regulation of neurogenesis	49/1382	455/17913	0.0110262	0.0576414	49	FN1/APOE/CXCL12/SERPINF1/SERPINE2/LRP1/FGFR1/MAP1B/PTN/MDK/HES1/NBL1/NTRK2/BMP5/SLIT2/AGT/CSF1/IRX3/DPYSL3/NRP1/NGFR/PTPRD/EPHA3/NDNF/EFNA5/SHOX2/SMARCD3/FEZ1/IL6ST/TNFRSF12A/APP/TIMP2/PLXNB2/SCARB2/TCF4/BMPR2/ILK/METRN/MEF2C/CTNNB1/TMEM106B/ZEB1/STK25/ABL2/RHEB/NME1/VEGFA/FLNA/HSPA5
GO:0090092	regulation of transmembrane receptor protein serine/threonine kinase signaling pathway	48/1382	215/17913	1.38118e-11	1.30089e-09	48	SFRP4/HTRA1/FBN1/CAV1/PMEPA1/CDKN1C/HES1/NBL1/EMILIN1/ASPN/LTBP1/VASN/SFRP1/SULF1/CAV2/BMP5/TGFB1I1/LOX/WWTR1/DKK3/CHRDL1/BAMBI/NEO1/FOXD1/NPNT/ZNF703/FST/TWSG1/RBPMS/LTBP4/DAB2/THBS1/ENG/CD109/BMPR2/HSP90AB1/ILK/ITGA8/HSPA1A/ZEB1/SMAD7/RPS27A/UBB/TOB1/STUB1/INHBA/FAM89B/HSPA5
GO:0060828	regulation of canonical Wnt signaling pathway	48/1382	264/17913	1.95365e-08	9.8695e-07	48	COL1A1/APOE/SFRP4/IGFBP4/FRZB/CAV1/IGFBP6/MDK/DLX5/SFRP1/RBMS3/WWTR1/DKK3/BICC1/SNAI2/YAP1/SOX9/ADGRA2/DAAM2/BAMBI/EGFR/ZNF703/DAB2/EGR1/SOX4/TCF7L2/PSMB5/LZTS2/CTHRC1/ILK/CTNND1/CTNNB1/PSMC3/PSMB6/PSMB1/PSMD8/IGFBP2/PSMD2/PSMA3/PSMC5/PSMD3/PSMB7/PSMC1/PSMA2/PSMA1/PSMC4/PSME2/PFDN5
GO:0007015	actin filament organization	48/1382	325/17913	1.00643e-05	0.000201177	48	CXCL12/DSTN/TPM1/EMP2/ID1/RHOC/EPS8/ITGB5/MYO1B/SFRP1/SORBS2/PLEKHH2/SLIT2/CTTN/LIMCH1/CDC42EP5/DPYSL3/DLC1/NRP1/NCKAP1/PFN2/FAT1/LMOD1/WASF3/SCIN/KIRREL1/LIMA1/SORBS3/ABI2/SDC4/PDLIM3/PAWR/ANG/MYO1C/S100A10/WASL/GSN/PHLDB2/ROCK2/CTNNA1/CFL2/FSCN1/RDX/SNX9/TMSB10/FLNA/HSP90B1/MARCKS
GO:0042692	muscle cell differentiation	48/1382	359/17913	0.000130234	0.00173136	48	IGFBP5/TPM1/LMNA/PDGFRB/PDGFRA/HES1/SGCB/SORBS2/CAV2/LOX/MMP14/AGT/TMEM119/SOX9/TBX2/EHD2/BOC/HEY2/NPNT/ANK2/SIX1/SHOX2/CD9/SMARCD3/CD81/COMP/CBY1/ITGB1/MYOF/ENG/PDLIM5/MYH11/MYH10/CTNNA1/CFL2/ITGA8/IGF1/MORF4L2/MEF2C/CALR/CTNNB1/ZEB1/CAPN2/MEF2A/YBX1/ATP2A2/VEGFA/ACTG1
GO:0035690	cellular response to drug	48/1382	362/17913	0.000159191	0.00206206	48	MT2A/ADIRF/SERPINF1/CYP1B1/ID1/GAS6/ERRFI1/SFRP1/AXL/SLIT2/SOX9/EGFR/EFNA5/RHOB/KLF9/CST3/EGR1/PAWR/VIM/KLF4/PPP1R14A/BNIP3/ADCY3/PDGFD/SOD1/NET1/FBXO32/ROCK2/HSP90AB1/CTNNA1/BAD/MYC/PARK7/MEF2C/CHMP5/CTNNB1/SPHK1/RACK1/STK25/NME1/RPS3/HNRNPA1/KLF2/HSPA5/HSP90B1/AHR/DDIT4/EIF4EBP1
GO:0006875	cellular metal ion homeostasis	48/1382	467/17913	0.0253727	0.105615	48	APOE/MT2A/CXCL12/LRP1/CAV1/THY1/PDGFRA/CP/GJA1/PTH1R/TF/CYBRD1/SLC39A14/C1QTNF1/AGT/PLN/SCARA5/EDNRA/KCNMA1/SYNPO/ANK2/ANXA2/S1PR3/ITGAV/APP/PKD1/BNIP3/SOD1/CAMK2D/YWHAE/MYC/CALR/NDFIP1/FIS1/SKP1/TMCO1/ABL2/SRI/CALM2/STOML2/TMEM165/ATP2A2/GSTO1/ATP1A1/TGM2/NEDD8/HEXB/HSP90B1
GO:0050900	leukocyte migration	48/1382	467/17913	0.0253727	0.105615	48	COL1A1/COL1A2/FN1/CXCL12/APOD/VCAM1/RARRES2/GAS6/CAV1/PTN/THY1/MDK/NBL1/EMILIN1/EPS8/SDC2/BMP5/MMP14/SLIT2/CSF1/ANGPT1/KITLG/JAM3/GPC1/IL1R1/CD9/ITGA1/SDC4/CD81/ITGB1/ITGAV/APP/THBS1/CCL2/PDGFD/WASL/LGALS3/MIF/SBDS/SHC1/CALR/ANGPT2/YES1/RPS19/C1QBP/VEGFA/PPIA/JAGN1
GO:0050878	regulation of body fluid levels	48/1382	499/17913	0.0661587	0.20436	48	COL1A1/COL1A2/COL3A1/APOE/MYL9/FBLN1/SERPINE2/SERPING1/EMP2/GAS6/CAV1/PDGFRA/TFPI/GJA1/CDO1/A2M/CCND1/C1QTNF1/PDPN/EHD2/PDGFA/PROCR/PRKG1/FAP/DOCK1/CSRP1/CD9/HSPB1/PAM/ANXA2/COMP/THBS1/STXBP1/ANXA5/VKORC1/ADCY3/CD59/ILK/PAPSS2/PRDX2/LMAN1/GNAS/NME1/C1QBP/VEGFA/FLNA/APRT/ACTG1
GO:0000184	nuclear-transcribed mRNA catabolic process, nonsense-mediated decay	47/1382	118/17913	2.35277e-22	1.08953e-19	47	RPL5/RPL7A/RPL10/RPL24/RPLP0/RPL29/RPL15/RPS18/RPL10A/RPL3/RPS5/RPS4X/RPS23/RPL41/RPS2/RPL11/RPL35/RPL8/RPL14/RPL37A/RPS9/RPS27A/RPS4Y1/RPL18/RPL23A/RPL6/RPS3A/RPS19/RPL26/RPL19/RPL18A/RPS16/RPL32/RPL12/RPS3/RPL13/RPL35A/RPL36/RPL4/RPL36A/RPS25/RPL13A/RPL17/RPS13/RPL31/RPS17/RPL22
GO:0022900	electron transport chain	47/1382	175/17913	1.62855e-14	3.48071e-12	47	NDUFA4L2/COX7A1/ASPH/P4HA2/NDUFS4/DHRS3/PHGDH/PARK7/ADH5/ALDH2/NDUFC2/NDUFB4/CYB5A/COX6C/DNAJC15/NDUFAF2/NDUFB7/ETFB/NDUFC1/NDUFB2/COX11/NDUFA8/NDUFA5/NDUFS5/NDUFA4/NDUFAB1/STEAP4/NDUFA12/NDUFB10/ISCU/NDUFA13/NDUFB5/UQCRQ/NDUFV2/NDUFB6/COX6A1/UQCC3/CYC1/NDUFB8/NDUFA6/AKR1A1/NDUFA11/NDUFB3/GLRX3/COX7C/UQCRH/UQCRB
GO:0006457	protein folding	47/1382	176/17913	2.05909e-14	3.88895e-12	47	CLU/CRYAB/FKBP9/HSPB6/HSPB1/LTBP4/PRDX4/HSPA1B/BAG3/CRTAP/PPIB/PDCD5/HSPA1A/CALR/LMAN1/SPHK1/PDIA6/CCT3/PDIA3/MLEC/ST13/PTGES3/FKBP4/HSPE1/DNAJC19/CCT7/PFDN2/PFDN1/HSPD1/SNRNP70/HSP90AA1/TBCA/CCT4/TCP1/PPIA/HSPA8/DNAJA1/CCT6A/PDIA4/PSMC1/HSPA5/UBXN1/HSP90B1/CCT2/CCT8/CCT5/PFDN5
GO:0071453	cellular response to oxygen levels	47/1382	237/17913	1.53654e-09	1.02874e-07	47	LMNA/EPAS1/CAV1/PTN/VASN/SFRP1/TWIST1/NDNF/PTGIS/EGR1/HILPDA/PSMB5/S100B/BNIP3/NDRG1/ZFP36L1/ROCK2/BAD/MYC/FAM162A/PSMC3/PSMB6/PSMB1/ACAA2/PSMD8/PHB2/RPS27A/UBB/NOP53/STUB1/ELOC/VEGFA/PSMD2/P4HB/PSMA3/PSMC5/PSMD3/PSMB7/PSMC1/PSMA2/PSMA1/PSMC4/CHCHD2/PSME2/EIF4EBP1/ENO1/MALAT1
GO:0003007	heart morphogenesis	47/1382	249/17913	8.09261e-09	4.49706e-07	47	TPM1/CPE/FOXC1/COL11A1/HES1/ADAMTS1/GJA1/COL5A1/NRP2/FOXC2/BMP5/RBP4/SLIT2/SLIT3/TWIST1/PARVA/DLC1/NRP1/SNAI2/YAP1/SOX9/TBX2/FLRT2/HEY2/SIX1/SHOX2/JAG1/SMARCD3/PTK2/SOX4/SAV1/ENG/AHI1/SNAI1/JUN/BMPR2/DHRS3/ILK/SPRY1/IFT57/MEF2C/CTNNB1/COL2A1/PLXND1/SMAD7/TMED2/VEGFA
GO:0042063	gliogenesis	47/1382	285/17913	5.57373e-07	1.80077e-05	47	CLU/SERPINE2/LEPR/LRP1/MXRA8/ID4/PTN/MDK/HES1/NTRK2/TMEM98/MMP14/NFIB/LAMB2/LGI4/CSF1/NDN/SOX9/DAAM2/LAMB1/WASF3/EGFR/CSPG4/PARD3/GPC1/CD9/SOX4/IL6ST/VIM/S100B/APP/CCL2/BNIP3/NFE2L1/NDRG1/SOD1/GSN/ILK/METRN/PHGDH/GSTP1/SUN1/CTNNB1/EEF2/RHEB/HEXB/EIF2B1
GO:0051098	regulation of binding	47/1382	368/17913	0.000438354	0.00457882	47	APOE/FOXC1/LRP1/CRTAC1/ID1/CAV1/HES1/MDFI/LOX/TWIST1/PLN/ANGPT1/LARP6/NRP1/BAMBI/HEY2/SMARCD3/DAB2/ANXA2/TCF7L2/APP/PHLDA2/KLF4/PKD1/S100A10/JUN/CTHRC1/HSP90AB1/NUCKS1/PPP2CB/IGF1/LGALS3/PARK7/MEF2C/CTNNB1/LRPAP1/EDF1/PLXND1/IFI16/RAN/RPL11/SRI/CALM2/NME1/STUB1/HSPA5/EIF3D
GO:0052548	regulation of endopeptidase activity	47/1382	370/17913	0.000494664	0.00498883	47	TIMP1/CRYAB/COL6A3/TIMP3/GAS6/TFPI/BEX3/A2M/DLC1/ITIH5/NGFR/CST3/ASPH/CRIM1/APP/THBS1/PEBP1/KLF4/CD109/GSN/ROCK2/YWHAE/BAD/MYC/MGMT/PDCD5/PARK7/IFT57/MTCH1/FAM162A/FIS1/DAP/RPS27L/RACK1/IFI16/HSPE1/SERPINB6/ARL6IP5/PRDX3/HSPD1/NDUFA13/VEGFA/RPS3/IFI6/PRELID1/PSMA3/CYCS
GO:0050808	synapse organization	47/1382	394/17913	0.00187952	0.0146692	47	APOE/SPARC/SPARCL1/TNC/MAP1B/PTN/NTRK2/NRP2/COL4A1/LAMB2/CTTN/FARP1/NRP1/PFN2/FLRT2/TMEM108/PTPRD/WASF3/SYNPO/TPBG/THBS2/EFNA5/SIX1/NRXN2/NFIA/SNCG/ABI2/PTK2/APP/PDLIM5/PLXNB2/NDRG1/WASL/MYH10/RYK/MTMR2/MEF2C/CTNNB1/PLXND1/CLSTN1/TUBB/CHCHD10/RER1/TUBA1A/ARF4/HSPA8/ACTG1
GO:0051346	negative regulation of hydrolase activity	47/1382	420/17913	0.00642158	0.0383706	47	TIMP1/CRYAB/ANGPTL4/LEPR/COL6A3/TIMP3/GAS6/PTN/TFPI/CNN3/BEX3/A2M/SLIT2/PLN/FARP1/ITIH5/NGFR/PLA2R1/SPRED1/CST3/CRIM1/MYO1D/APP/THBS1/PEBP1/KLF4/PPP1R14A/TIMP2/CD109/BOD1/ROCK2/YWHAE/SPRY1/RDX/ARL2/LGALS3/PARK7/IFI16/SERPINB6/PRDX3/PPP1R14B/TMED2/VEGFA/IFI6/PPP1R15A/UBXN1/SET
GO:1901615	organic hydroxy compound metabolic process	47/1382	500/17913	0.0915741	0.255589	47	APOE/LEPR/CYP1B1/FGFR1/EPAS1/PTH1R/BMP5/RBP4/DIO2/DKK3/SNAI2/AKR1C1/AKR1C2/ALDH1A3/LIMA1/PLTP/APP/MYOF/ISYNA1/CYB5R3/NFE2L1/COMT/SNAI1/SOD1/CPQ/DHRS3/ACADVL/IGF1/HDLBP/AKR1C3/MTMR2/PARK7/ADH5/ALDH2/PNKD/SPHK1/CES1/PTS/INSIG2/ACAA2/RAN/NUDT4/EBPL/MBTPS1/CNBP/AKR1A1/FDPS
GO:0048705	skeletal system morphogenesis	46/1382	204/17913	2.55911e-11	2.37016e-09	46	COL1A1/MGP/SFRP4/FOXC1/FGFR1/ACAN/COL11A1/MMP2/PDGFRA/PRRX1/SERPINH1/CHAD/DLX5/MDFI/SFRP1/FOXC2/MMP14/TWIST1/SATB2/TMEM119/SOX9/TBX15/FGFR3/COL27A1/COL13A1/SIX1/SHOX2/RUNX2/COMP/ALPL/TULP3/SLC39A1/THRA/PKD1/ARID5B/BMPR2/DHRS3/RYK/MEF2C/TRIP11/CTNNB1/COL2A1/ZEB1/GNAS/INSIG2/PRKRA
GO:0071456	cellular response to hypoxia	46/1382	210/17913	7.29415e-11	6.33337e-09	46	LMNA/EPAS1/PTN/VASN/SFRP1/TWIST1/NDNF/PTGIS/EGR1/HILPDA/PSMB5/S100B/BNIP3/NDRG1/ZFP36L1/ROCK2/BAD/MYC/FAM162A/PSMC3/PSMB6/PSMB1/ACAA2/PSMD8/PHB2/RPS27A/UBB/NOP53/STUB1/ELOC/VEGFA/PSMD2/P4HB/PSMA3/PSMC5/PSMD3/PSMB7/PSMC1/PSMA2/PSMA1/PSMC4/CHCHD2/PSME2/EIF4EBP1/ENO1/MALAT1
GO:0036294	cellular response to decreased oxygen levels	46/1382	220/17913	3.76368e-10	2.90483e-08	46	LMNA/EPAS1/PTN/VASN/SFRP1/TWIST1/NDNF/PTGIS/EGR1/HILPDA/PSMB5/S100B/BNIP3/NDRG1/ZFP36L1/ROCK2/BAD/MYC/FAM162A/PSMC3/PSMB6/PSMB1/ACAA2/PSMD8/PHB2/RPS27A/UBB/NOP53/STUB1/ELOC/VEGFA/PSMD2/P4HB/PSMA3/PSMC5/PSMD3/PSMB7/PSMC1/PSMA2/PSMA1/PSMC4/CHCHD2/PSME2/EIF4EBP1/ENO1/MALAT1
GO:0034599	cellular response to oxidative stress	46/1382	296/17913	3.91655e-06	9.50405e-05	46	TPM1/SOD3/CYP1B1/EPAS1/MMP2/PDGFRA/AXL/GPX3/GPX8/EGFR/PLA2R1/RHOB/CST3/HSPB1/PAWR/HSPA1B/PRDX1/KLF4/BNIP3/PDGFD/NFE2L1/SOD1/NET1/JUN/AKR1C3/MGMT/GSTP1/PARK7/HSPA1A/PRDX2/CTNNB1/PRDX6/SPHK1/RWDD1/RACK1/STK25/ARL6IP5/PRDX3/PRKRA/ATP2A2/CCS/RPS3/P4HB/KLF2/FOS/CYCS
GO:0043161	proteasome-mediated ubiquitin-dependent protein catabolic process	46/1382	328/17913	5.6773e-05	0.000848085	46	CLU/CAV1/WWTR1/MAP1A/DAB2/PSMB5/HSP90AB1/PPP2CB/PARK7/HSPA1A/IFI27/CTNNB1/PSMC3/PSMB6/PSMB1/RACK1/SKP1/CAMLG/ANAPC11/SMAD7/PSMD8/RPL11/OS9/SPOP/RPS27A/UBB/NOP53/STUB1/PSMD2/PCNP/PSMA3/PSMC5/PSMD3/PSMB7/PSMC1/PSMA2/HSPA5/RNF5/UBXN1/PSMA1/HSP90B1/SEC61B/CDC26/SUMO2/PSMC4/PSME2
GO:0009896	positive regulation of catabolic process	46/1382	392/17913	0.00287897	0.0206301	46	DCN/CLU/APOE/LRP1/NUPR1/CAV1/GJA1/TWIST1/SOX9/SH3D19/DAB2/PTK2/CD81/BAG3/BNIP3/ZBTB20/ZFP36L1/ROCK2/TNFSF12/BAD/IGF1/RDX/PTTG1IP/MAGEF1/PARK7/HSPA1A/TMEM59/TRIM8/PSMC3/SNX9/SCOC/RACK1/SMAD7/OPTN/NDUFA13/NOP53/TOB1/HSP90AA1/STUB1/PSMC5/PSMC1/HNRNPR/SUMO2/PSMC4/ZFP36/TOMM7
GO:0043010	camera-type eye development	45/1382	295/17913	8.15191e-06	0.000170301	45	SERPINF1/CRYAB/FOXC1/CYP1B1/PDGFRB/FBN1/PTN/THY1/PDGFRA/CDKN1C/GJA1/NTRK2/COL8A1/EFEMP1/FOXC2/RBP4/COL4A1/LAMB2/TWIST1/NRP1/SOX9/TBX2/ALDH1A3/FAT1/EGFR/JAG1/SMARCD3/ABI2/TWSG1/CLIC4/TULP3/VIM/C12orf57/AHI1/KLF4/JUN/MYH10/BMPR2/CTNNB1/RPL24/ZEB1/IMPDH2/VEGFA/INHBA/PFDN5
GO:0019058	viral life cycle	45/1382	324/17913	8.58719e-05	0.00120808	45	APOE/IFITM3/LGALS1/GAS6/CAV1/NCAM1/ITGB5/AXL/CAV2/EGFR/NFIA/CD81/HSPA1B/ITGB1/EEA1/ITGAV/CCL2/SCARB2/PCSK5/GSN/NECTIN2/ROCK2/HACD3/HSP90AB1/NUCKS1/PPIB/ADARB1/HSPA1A/CHMP5/IFI27/BANF1/TRIM8/MVB12A/CTSB/SIVA1/IFI16/RAN/RPS27A/UBB/IFITM1/MPHOSPH8/PPIA/HSPA8/P4HB/HTATSF1
GO:0032102	negative regulation of response to external stimulus	45/1382	343/17913	0.000319182	0.00359048	45	APOE/SERPINF1/SERPINE2/HTRA1/SERPING1/APOD/PDGFRA/TFPI/MDK/NBL1/GJA1/C1QTNF1/SLIT2/NRP1/SNAI2/NT5E/PDGFA/PRKG1/FAP/PTGIS/CD9/KANK2/BACE1/SOCS3/THBS1/KLF4/CCL2/NENF/CD109/SOD1/PHLDB2/SPP1/TNFRSF1A/IGF1/RYK/CDKN1A/GSTP1/MIF/PRDX2/ANGPT2/CUEDC2/RPS19/C1QBP/TNFAIP6/PSMA1
GO:0018108	peptidyl-tyrosine phosphorylation	45/1382	346/17913	0.000386942	0.00416712	45	FGFR1/PDGFRB/GAS6/CAV1/THY1/FGF7/PDGFRA/HES1/ERRFI1/NTRK2/DDR2/EFEMP1/SFRP1/AXL/AGT/ANGPT1/NRP1/KITLG/ENPP2/GHR/PDGFA/EPHA3/FGFR3/EGFR/GPRC5A/CSPG4/EFNA5/ABI2/PTK2/CD81/IL6ST/SOCS3/PDGFC/APP/PDGFD/TNFRSF1A/IGF1/RYK/MIF/SHC1/RACK1/ABL2/SCYL1/YES1/VEGFA
GO:0070997	neuron death	45/1382	347/17913	0.000412234	0.00437173	45	CLU/APOE/SERPINF1/LRP1/NUPR1/MDK/CHL1/NTRK2/AXL/CSF1/ANGPT1/UNC5B/NRP1/NGFR/NDNF/SIX1/GPNMB/ITGA1/EGR1/BACE1/APP/STXBP1/RETREG1/CCL2/BNIP3/ATN1/SOD1/JUN/HSP90AB1/ILK/BAD/ADARB1/PARK7/MEF2C/CTNNB1/FAM162A/FIS1/CAPN2/RACK1/UBB/PSMC1/HSPA5/FOS/SET/DDIT4
GO:0018212	peptidyl-tyrosine modification	45/1382	349/17913	0.000467298	0.00477348	45	FGFR1/PDGFRB/GAS6/CAV1/THY1/FGF7/PDGFRA/HES1/ERRFI1/NTRK2/DDR2/EFEMP1/SFRP1/AXL/AGT/ANGPT1/NRP1/KITLG/ENPP2/GHR/PDGFA/EPHA3/FGFR3/EGFR/GPRC5A/CSPG4/EFNA5/ABI2/PTK2/CD81/IL6ST/SOCS3/PDGFC/APP/PDGFD/TNFRSF1A/IGF1/RYK/MIF/SHC1/RACK1/ABL2/SCYL1/YES1/VEGFA
GO:0060249	anatomical structure homeostasis	45/1382	413/17913	0.0118728	0.0605701	45	FOXC1/BGLAP/EPAS1/PTH1R/CTSK/TF/RCN3/RBP4/LOX/WWTR1/CSF1/PDK4/TMEM119/YAP1/SOX9/TNFRSF11B/EGFR/MAP1A/HSPB1/BAG3/PRDX1/SOD1/HSP90AB1/CFL2/AKT3/MYC/CTNNB1/COL2A1/GNAS/CCT3/PTGES3/POLD2/CCT7/NHP2/HSP90AA1/ERCC1/CCT4/VEGFA/TCP1/CCT6A/HNRNPA1/CCT2/CCT8/CCT5/ACTG1
GO:0002694	regulation of leukocyte activation	45/1382	492/17913	0.132167	0.330389	45	LGALS1/VCAM1/GAS6/CAV1/THY1/MDK/HES1/SFRP1/AXL/MMP14/SLC7A2/PDE5A/CD276/GPNMB/TWSG1/SDC4/CD81/IL6ST/PAWR/APP/THBS1/STXBP1/CCL2/SOD1/GSN/ZFP36L1/NECTIN2/BAD/IGF1/CDKN1A/LGALS3/MIF/PRDX2/MEF2C/CTNNB1/SPHK1/ZEB1/SMAD7/IGFBP2/YES1/HSPD1/INHBA/RPS3/PRELID1/AHR
GO:0006119	oxidative phosphorylation	44/1382	131/17913	1.17691e-17	3.27003e-15	44	NUPR1/NDUFS4/PARK7/ATP5MC3/NDUFC2/NDUFB4/ATP5PF/COX6C/DNAJC15/NDUFB7/NDUFC1/CHCHD10/NDUFB2/NDUFA8/NDUFA5/NDUFS5/NDUFA4/NDUFAB1/NDUFA12/STOML2/NDUFB10/ISCU/ATP5MC1/NDUFA13/NDUFB5/ATP5F1C/UQCRQ/NDUFV2/NDUFB6/COX6A1/UQCC3/CYC1/NDUFB8/NDUFA6/NDUFA11/ATP5PO/ATP5F1D/NDUFB3/ATP5F1B/ATP5MF/COX7C/ATP5ME/UQCRH/UQCRB
GO:0007179	transforming growth factor beta receptor signaling pathway	44/1382	184/17913	8.59278e-12	8.23277e-10	44	COL1A2/COL3A1/HTRA1/FMOD/FBN1/ID1/CAV1/PMEPA1/CDKN1C/EMILIN1/LTBP2/FERMT2/ASPN/ITGB5/LTBP1/VASN/CAV2/TGFB1I1/LOX/DKK3/BAMBI/NPNT/ZNF703/PARD3/TWSG1/LTBP4/DAB2/PTK2/THBS1/ENG/CD109/SMAD5/JUN/HSP90AB1/ITGA8/HSPA1A/ZEB1/SMAD7/RPS27A/UBB/STUB1/FAM89B/HSPA5/FOS
GO:0030278	regulation of ossification	44/1382	199/17913	1.36567e-10	1.14985e-08	44	MGP/IGFBP5/ID3/BGLAP/ID4/ID1/PTN/MDK/GJA1/DDR2/ENPP1/OMD/FAM20C/SFRP1/TWIST1/CSF1/TMEM119/SNAI2/SOX9/INTU/NPNT/JAG1/TWSG1/RUNX2/PTK2/COMP/IL6ST/PBX1/CEBPD/GPM6B/SMAD5/CTHRC1/BMPR2/DHRS3/ANKH/ILK/IGF1/TOB2/MEF2C/ATRAID/CTNNB1/GNAS/IFITM1/TOB1
GO:0010810	regulation of cell-substrate adhesion	44/1382	201/17913	1.92526e-10	1.59681e-08	44	COL1A1/FN1/LGALS1/FBLN1/CCDC80/APOD/LRP1/EMP2/PTN/THY1/MDK/EDIL3/COL8A1/SFRP1/ABI3BP/SMOC2/MMP14/LIMCH1/PDPN/CSF1/DLC1/NRP1/COL16A1/EPHA3/NDNF/NPNT/DOCK1/EFNA5/JAG1/NID1/SDC4/PTK2/THBS1/GPM6B/S100A10/PHLDB2/ROCK2/ILK/ARL2/CALR/ANGPT2/C1QBP/VEGFA/FLNA
GO:0060485	mesenchyme development	44/1382	258/17913	4.93562e-07	1.63257e-05	44	COL1A1/FN1/ACTA2/FOXC1/FRZB/FGFR1/PDGFRB/MDK/HES1/VASN/NRP2/SFRP1/FOXC2/BMP5/TGFB1I1/PDPN/WWTR1/TWIST1/NRP1/SNAI2/YAP1/SOX9/KITLG/TBX2/EDNRA/BAMBI/EPHA3/FOXD1/HEY2/ZNF703/SIX1/JAG1/PHLDB1/DAB2/ENG/SNAI1/PHLDB2/ZFP36L1/BMPR2/SPRY1/MYC/MEF2C/CTNNB1/SMAD7
GO:0071214	cellular response to abiotic stimulus	44/1382	310/17913	6.13502e-05	0.000906711	44	COL1A1/ADIRF/CRYAB/PTN/GJA1/ERRFI1/SFRP1/AGT/TMEM150C/SNAI2/YAP1/SOX9/MAPK10/EFHD1/EGFR/RHOB/MYLK/EGR1/LTBR/BAG3/ENG/BNIP3/NET1/YBX3/ZFP36L1/NUCKS1/TNFRSF1A/MAP3K20/BAD/MYC/MGMT/CRIP1/CDKN1A/NPM1/TMEM109/GTF2H5/IFI16/SERPINB6/RPL26/ATP1A1/COPS9/HSPA5/METAP2/GADD45A
GO:0104004	cellular response to environmental stimulus	44/1382	310/17913	6.13502e-05	0.000906711	44	COL1A1/ADIRF/CRYAB/PTN/GJA1/ERRFI1/SFRP1/AGT/TMEM150C/SNAI2/YAP1/SOX9/MAPK10/EFHD1/EGFR/RHOB/MYLK/EGR1/LTBR/BAG3/ENG/BNIP3/NET1/YBX3/ZFP36L1/NUCKS1/TNFRSF1A/MAP3K20/BAD/MYC/MGMT/CRIP1/CDKN1A/NPM1/TMEM109/GTF2H5/IFI16/SERPINB6/RPL26/ATP1A1/COPS9/HSPA5/METAP2/GADD45A
GO:0071496	cellular response to external stimulus	44/1382	320/17913	0.000129268	0.00172265	44	COL1A1/TNC/VCAM1/BGLAP/GAS6/PTN/GJA1/LPL/SFRP1/AXL/AGT/PDK4/TMEM150C/SNAI2/SOX9/EGFR/KANK2/LTBR/BAG3/ENG/BNIP3/COMT/SOD1/JUN/ATF3/BMPR2/TNFRSF1A/BAD/AKR1C3/CDKN1A/GSTP1/RRAGA/DAP/DNAJC15/IFI16/KLF10/ATP1A1/HSPA8/HNRNPA1/TXN2/HSPA5/HSP90B1/FOS/GADD45A
GO:0006790	sulfur compound metabolic process	44/1382	346/17913	0.000719018	0.00685349	44	DCN/LUM/BGN/PRELP/FMOD/GGT5/ACAN/OGN/CDO1/ENPP1/OMD/PDK4/ANGPT1/GSTM3/GHR/NDNF/CSPG4/DSEL/CHST3/UGDH/PCYOX1/VCAN/MGST3/NFE2L1/COMT/SOD1/ESD/PAPSS2/GPX4/PHGDH/DBI/GSTP1/PARK7/ADI1/PAPSS1/PDZD11/GLO1/ISCU/GSTO1/MPC1/HEXB/AKR1A1/TXN2/GLRX3
GO:0010256	endomembrane system organization	44/1382	365/17913	0.00210586	0.0160086	44	CLU/SERPINE2/LMNA/CAV1/COL5A1/CAV2/EHD2/PLSCR4/A4GALT/DYNC2H1/ANK2/CAMSAP2/MYOF/PDE4DIP/LAPTM4B/ARHGAP21/NDRG1/SCARB2/ARL1/SOD1/WASL/GSN/MYH10/NECTIN2/REEP3/SUN1/CHMP5/TRIP11/ATL3/LMAN1/BANF1/SNX9/MVB12A/TMED9/STK25/RAB2A/OPTN/USO1/SQSTM1/ATP2A2/TMED2/AKAP9/JAGN1/SURF4
GO:0009100	glycoprotein metabolic process	44/1382	369/17913	0.00259501	0.0189245	44	DCN/BGN/ACAN/COL11A1/SULF1/RAMP1/NDNF/A4GALT/TUSC3/CSPG4/DSEL/CHST3/TMTC1/GPC1/CST3/UGDH/PAWR/TCF7L2/VCAN/ADAMTS9/VEGFB/EXT2/BMPR2/OSTC/DAD1/IGF1/PARK7/MCFD2/TRIP11/CTNNB1/COL2A1/PHLDA1/TMEM59/LMAN1/DPM3/KRTCAP2/OS9/PGM3/TMEM165/HEXB/ITM2B/RNF5/TMEM258/OST4
GO:0006417	regulation of translation	44/1382	397/17913	0.00961443	0.0522773	44	IGFBP5/RBMS3/DIO2/LARP6/HSPB1/SOX4/ANG/VIM/APP/THBS1/SAMD4A/YBX3/ZFP36L1/ROCK2/PURA/RPL5/NPM1/CALR/RPL10/RPS27L/CIRBP/RPS4X/EEF2/RACK1/EIF4A2/EIF5A/EIF6/DDX1/PA2G4/TOB1/RPL26/C1QBP/NCL/RPS3/EIF5B/HNRNPR/PPP1R15A/RPL13A/EIF2A/ZFP36/EIF3B/EIF3D/RPL22/EIF4EBP1
GO:0043434	response to peptide hormone	44/1382	404/17913	0.0128344	0.064427	44	COL1A1/SPARC/IGFBP5/CXCL12/TIMP1/RARRES2/BGLAP/MAP1B/FBN1/CAV1/GJA1/LPL/ERRFI1/CDO1/ENPP1/FOXC2/CAV2/AGT/PLN/PDK4/GHR/TIMP4/EGR1/PTK2/MYO1C/LEPROT/ADCY3/ZFP36L1/RAB13/ROCK2/NUCKS1/GSTP1/SHC1/AHCYL1/INSIG2/PHB/NR4A1/USO1/EIF6/CYC1/HADHA/EIF2B1/EIF4EBP1/APRT
GO:0046394	carboxylic acid biosynthetic process	44/1382	426/17913	0.0290836	0.117711	44	DCN/BGN/GGT5/PTGDS/NUPR1/PLOD2/LPL/CDO1/PDK4/ALDH1A3/RBP1/CSPG4/DSEL/PTGIS/UGDH/VCAN/FADS3/MGST3/SLC1A3/ZBTB20/HACD3/MGLL/ACADVL/IGF1/GPX4/AKR1C3/PHGDH/CBR1/MIF/PARK7/ADI1/BCAT1/LDHA/INSIG2/TPI1/PTGES3/OAT/NDUFAB1/EIF6/PKM/PFKP/PGAM1/DDIT4/ENO1
GO:0016053	organic acid biosynthetic process	44/1382	427/17913	0.0300933	0.120996	44	DCN/BGN/GGT5/PTGDS/NUPR1/PLOD2/LPL/CDO1/PDK4/ALDH1A3/RBP1/CSPG4/DSEL/PTGIS/UGDH/VCAN/FADS3/MGST3/SLC1A3/ZBTB20/HACD3/MGLL/ACADVL/IGF1/GPX4/AKR1C3/PHGDH/CBR1/MIF/PARK7/ADI1/BCAT1/LDHA/INSIG2/TPI1/PTGES3/OAT/NDUFAB1/EIF6/PKM/PFKP/PGAM1/DDIT4/ENO1
GO:0051090	regulation of DNA-binding transcription factor activity	44/1382	429/17913	0.0321946	0.127063	44	CLU/SFRP4/ID3/CYP1B1/NUPR1/ID1/GAS6/CAV1/PLPP3/DDR2/ENPP1/MDFI/AGT/TWIST1/MAPK10/PTGIS/TCF7L2/HSPA1B/SAV1/APP/KLF4/PKD1/ARID5B/JUN/PARK7/NPM1/HSPA1A/PRDX2/CTNNB1/TRIM8/SPHK1/DAP/RWDD1/SMAD7/SRI/PRDX3/PHB2/RPS27A/UBB/VEGFA/FLNA/RPS3/FOS/BHLHE40
GO:0030178	negative regulation of Wnt signaling pathway	43/1382	198/17913	4.0306e-10	3.06822e-08	43	APOE/SFRP4/IGFBP4/LRP1/FRZB/WIF1/CAV1/IGFBP6/MDK/MDFI/SFRP1/RBMS3/WWTR1/DKK3/BICC1/SNAI2/SOX9/DAB2/EGR1/TCF7L2/CBY1/PSMB5/LZTS2/CTHRC1/CTNND1/HIC1/PSMC3/PSMB6/PSMB1/RACK1/PSMD8/IGFBP2/PSMD2/PSMA3/PSMC5/PSMD3/PSMB7/PSMC1/PSMA2/PSMA1/PSMC4/PSME2/PFDN5
GO:0097191	extrinsic apoptotic signaling pathway	43/1382	213/17913	4.32712e-09	2.50477e-07	43	LMNA/TIMP3/FGFR1/CAV1/BEX3/SFRP1/BMP5/AGT/CTTN/UNC5B/NRP1/SNAI2/YAP1/KITLG/SRPX/FGFR3/TCF7L2/LTBR/HSPA1B/BAG3/TNFRSF12A/ITGAV/THBS1/ATF3/TNFSF12/TNFRSF1A/CTNNA1/BAD/IGF1/GSTP1/LGALS3/PARK7/HSPA1A/PRDX2/IFI27/COL2A1/SIVA1/PDIA3/PEA15/ITM2C/NDUFA13/INHBA/IFI6
GO:1903311	regulation of mRNA metabolic process	43/1382	275/17913	6.83462e-06	0.000148359	43	RBFOX2/HSPB1/PSMB5/VIM/YBX3/ZFP36L1/ROCK2/NPM1/HSPA1A/PSMC3/AHCYL1/PRDX6/PSMB6/CIRBP/NSRP1/PSMB1/PSMD8/YBX1/RPS27A/UBB/SAP18/SNRNP70/TOB1/C1QBP/PSMD2/HSPA8/HNRNPA0/PSMA3/PSMC5/PSMD3/PSMB7/HNRNPA1/PSMC1/PSMA2/HNRNPR/PSMA1/SERBP1/CARHSP1/SET/PSMC4/SRSF7/ZFP36/PSME2
GO:0032984	protein-containing complex disassembly	43/1382	298/17913	5.01608e-05	0.00076578	43	DSTN/MAP1B/CAV1/EPS8/PLEKHH2/LMOD1/SCIN/LIMA1/SMARCD3/ASPH/BNIP3/GSN/CFL2/MYC/RDX/GADD45GIP1/MRPL32/CHMP5/MRPS26/CTNNB1/MRPL18/MRPL34/MRPL43/MRPL27/MRPL40/MRPS21/CHCHD10/MRPL17/EIF5A/MRPL36/TRMT112/MRPL33/MRPL41/HSPA8/MRPS36/MRPL20/MRPL14/MRPS6/MRPS15/MRPL11/SET/MRPL3/DDIT4
GO:0009314	response to radiation	43/1382	435/17913	0.0557627	0.182708	43	COL3A1/CXCL12/ADIRF/CRYAB/VCAM1/PTN/CCND1/SFRP1/SNAI2/SCARA3/YAP1/MAPK10/SYNPO/EGFR/RHOB/EGR1/BACE1/ITGB1/APP/SLC1A3/NET1/NUCKS1/MAP3K20/SDF4/MYC/MGMT/CRIP1/CDKN1A/NPM1/TMEM109/GTF2H5/ANGPT2/CIRBP/IFI16/RPL26/ERCC1/DYNLRB1/COPS9/HSPA5/FOS/METAP2/BHLHE40/GADD45A
GO:0048871	multicellular organismal homeostasis	43/1382	472/17913	0.144177	0.350477	43	LEPR/FOXC1/BGLAP/EPAS1/ID1/CAV1/GJA1/PTH1R/CTSK/LAMA4/TF/RCN3/FOXC2/RBP4/TNS2/WWTR1/DIO2/CSF1/PDK4/NDN/IRX3/TMEM119/YAP1/SOX9/ADAMTS5/TNFRSF11B/EGFR/HSPB1/EGR1/PDGFC/THRA/PRDX1/ADCY3/SOD1/ACADVL/AKT3/CTNNB1/COL2A1/GNAS/RHEB/UBB/VEGFA/ACTG1
GO:0045333	cellular respiration	42/1382	176/17913	2.74003e-11	2.49612e-09	42	BNIP3/NDUFS4/PARK7/NDUFC2/NDUFB4/COX6C/DNAJC15/NDUFAF2/SDHD/NDUFB7/ETFB/NDUFC1/NDUFB2/NDUFA8/NDUFA5/NDUFS5/NDUFA4/NDUFAB1/NDUFA12/NDUFB10/ISCU/MDH2/NDUFA13/NOP53/NDUFB5/UQCRQ/NDUFV2/NDUFB6/COX6A1/UQCC3/CYC1/NDUFB8/NDUFA6/PRELID1/NDUFA11/ATP5F1D/NDUFB3/COX7C/UQCRH/IDH3G/UQCRB/CYCS
GO:0034504	protein localization to nucleus	42/1382	223/17913	5.32833e-08	2.34996e-06	42	COL1A1/LMNA/APOD/TMEM98/AGT/ANGPT1/SOX9/NGFR/DCLK1/SIX1/OTUD7B/BAG3/LZTS2/PKIG/YWHAE/PTTG1IP/CDKN1A/ARL2/SUN1/PARK7/CALR/TRIM8/CHCHD10/CCT3/SKP1/RAN/RPL11/MBTPS1/MDFIC/CCT7/PHB2/NOP53/CCT4/TCP1/RPF2/CBLB/FLNA/CCT6A/TXNIP/CCT2/CCT8/CCT5
GO:0043542	endothelial cell migration	42/1382	275/17913	1.56574e-05	0.000295946	42	DCN/APOE/SPARC/SERPINF1/CYP1B1/FGFR1/EMP2/ID1/PTN/NR2F2/NRP2/FOXC2/SMOC2/SLIT2/AGT/ANGPT1/NRP1/SASH1/ADGRA2/FAP/RHOB/SPRED1/HSPB1/AMOTL1/PTK2/ITGB1/ADAMTS9/THBS1/KLF4/RAB13/ROCK2/TNFSF12/BMPR2/AKT3/MEF2C/CALR/ANGPT2/PLXND1/AAMP/NR4A1/VEGFA/ATP5F1B
GO:0048562	embryonic organ morphogenesis	42/1382	276/17913	1.71206e-05	0.000317131	42	FRZB/FGFR1/COL11A1/FBN1/PDGFRA/PRRX1/HES1/GJA1/DLX5/EFEMP1/MDFI/FOXC2/RBP4/MMP14/TWIST1/SATB2/YAP1/SOX9/TBX2/ALDH1A3/TBX15/DLX6/SIX1/SHOX2/MAFB/RUNX2/TULP3/SLC39A1/ENG/AHI1/SOD1/CTHRC1/ITGA8/IFT57/MEF2C/CTNNB1/COL2A1/ZEB1/GNAS/INSIG2/PRKRA/TMED2
GO:0097193	intrinsic apoptotic signaling pathway	42/1382	277/17913	1.87086e-05	0.000340865	42	CLU/CXCL12/CYP1B1/NUPR1/CAV1/ACKR3/SNAI2/PHLDA3/HSPB1/BNIP3/SNAI1/SOD1/YBX3/TNFRSF1A/BAD/CRIP1/PTTG1IP/CDKN1A/HIC1/MIF/PARK7/HSPA1A/FIS1/RPS27L/RACK1/VDAC2/IFI16/RPL11/STK25/ARL6IP5/PRKRA/UBB/NDUFA13/RPL26/RPS3/DNAJA1/IFI6/P4HB/PPP1R15A/DDIT4/HINT1/ENO1
GO:0010632	regulation of epithelial cell migration	42/1382	294/17913	7.69616e-05	0.0010938	42	DCN/APOE/SPARC/SERPINF1/FGFR1/EMP2/PTN/FGF7/PLPP3/NR2F2/NRP2/FOXC2/SMOC2/SLIT2/AGT/ANGPT1/NRP1/SOX9/PFN2/SASH1/ADGRA2/ENPP2/PTPRG/DOCK1/RHOB/SPRED1/HSPB1/AMOTL1/PTK2/ADAMTS9/THBS1/KLF4/JUN/ROCK2/BMPR2/AKT3/MEF2C/CALR/ANGPT2/AAMP/VEGFA/ATP5F1B
GO:0007568	aging	42/1382	318/17913	0.000432293	0.00453255	42	DCN/IGFBP5/TIMP1/SERPINF1/CRYAB/PRELP/LMNA/SERPING1/APOD/LRP1/VCAM1/BGLAP/PDGFRB/CDKN1C/PTH1R/AGT/TWIST1/COL4A2/TBX2/PLA2R1/COMP/PAWR/APP/ENG/TIMP2/SOD1/GSN/JUN/CTNNA1/ILK/GPX4/AKT3/CDKN1A/MIF/NPM1/CALR/EEF2/RWDD1/IGFBP2/ERCC1/RSL1D1/FOS
GO:0031331	positive regulation of cellular catabolic process	42/1382	341/17913	0.0017509	0.0138207	42	DCN/CLU/APOE/LRP1/NUPR1/CAV1/TWIST1/SH3D19/DAB2/PTK2/CD81/BAG3/BNIP3/ZBTB20/ZFP36L1/ROCK2/BAD/IGF1/RDX/PTTG1IP/MAGEF1/PARK7/HSPA1A/TMEM59/TRIM8/PSMC3/SNX9/SCOC/RACK1/SMAD7/OPTN/NOP53/TOB1/HSP90AA1/STUB1/PSMC5/PSMC1/HNRNPR/SUMO2/PSMC4/ZFP36/TOMM7
GO:0001701	in utero embryonic development	42/1382	342/17913	0.0018513	0.0144693	42	TPM1/FOXC1/FGFR1/EPAS1/PDGFRA/CDKN1C/HES1/NR2F2/GJA1/MDFI/BMP5/TWIST1/ANGPT1/EDNRA/HEY2/EGFR/SLC39A1/SOCS3/ITGB1/TM4SF1/PHLDA2/PKD1/SNAI1/MYH10/YBX3/ZFP36L1/DAD1/IGF1/SBDS/CTNNB1/PRMT1/PSMC3/CAPN2/YBX1/JUNB/RPL7L1/TMED2/VEGFA/SF3B6/KLF2/PSMC4/EIF2S2
GO:0051604	protein maturation	42/1382	353/17913	0.00333148	0.0232576	42	CLU/CFH/SERPINE2/SERPING1/C1R/C1S/SERPINH1/A2M/TMEM98/MMP14/GAS1/ENPEP/ADAMTS2/DYNC2H1/ASPH/CD81/SOX4/COMP/PRDX4/THBS1/GCSH/PCSK5/GSN/CD59/BAD/MAGEF1/CALR/TMEM59/CES1/CAPN2/IFI16/PHB/NDUFAB1/STOML2/HSPD1/STUB1/C1QBP/CCS/DHPS/METAP2/GLRX3/ENO1
GO:0031346	positive regulation of cell projection organization	42/1382	362/17913	0.00520988	0.0326395	42	FN1/APOE/CXCL12/SERPINF1/LRP1/FGFR1/MAP1B/PTN/MDK/NTRK2/BMP5/SLIT2/AGT/CDC42EP5/DPYSL3/NRP1/CDC42EP4/NCKAP1/CDC42EP1/NGFR/ENPP2/PTPRD/EPHA3/NDNF/EFNA5/SHOX2/FEZ1/TNFRSF12A/PLXNB2/SCARB2/WASL/BMPR2/ILK/METRN/FSCN1/TMEM106B/STK25/ABL2/NME1/RALA/VEGFA/HSPA5
GO:0022613	ribonucleoprotein complex biogenesis	42/1382	381/17913	0.0122208	0.0621896	42	HSP90AB1/RPL5/SBDS/NPM1/NBDY/GTF2H5/CIRBP/RPS23/RAN/RPS2/RPL11/PTGES3/RPL14/RPS9/TRMT112/FAM207A/EIF6/DDX1/PA2G4/NOP53/EIF3I/NHP2/RPS19/HSP90AA1/RPL26/RPS16/SNRPE/C1QBP/RPF2/EIF3G/RPL35A/SNRPD1/SNRPF/SNRPD2/RPL13A/EIF2A/NSA2/SNU13/EIF3B/EIF3D/RPS17/TXNL4A
GO:0002768	immune response-regulating cell surface receptor signaling pathway	42/1382	434/17913	0.0754986	0.223739	42	THY1/NCKAP1/MAPK10/DOCK1/PTK2/CD81/MYO10/PAWR/PSMB5/MYO1C/WASL/JUN/NECTIN2/HSP90AB1/PHPT1/LGALS3/ARPC1A/MEF2C/SHC1/PSMC3/PSMB6/PSMB1/SKP1/PSMD8/STOML2/YES1/HSP90AA1/PSMD2/RPS3/RFTN1/PSMA3/PSMC5/PSMD3/PSMB7/PSMC1/PSMA2/PSMA1/FOS/EIF2B1/PSMC4/PSME2/ACTG1
GO:0042110	T cell activation	42/1382	443/17913	0.0959758	0.264031	42	LGALS1/LEPR/VCAM1/CAV1/THY1/MDK/HES1/GJA1/CD151/TMEM98/FZD8/PDE5A/CD276/GPNMB/MAFB/TWSG1/RUNX2/EGR1/SDC4/CD81/SOX4/IL6ST/PAWR/CCL2/SOD1/GSN/ZFP36L1/BAD/IGF1/KDELR1/LGALS3/PRDX2/CTNNB1/ZEB1/SMAD7/IGFBP2/STOML2/YES1/HSPD1/RPS3/PRELID1/RPL22
GO:0016311	dephosphorylation	42/1382	458/17913	0.137804	0.340408	42	PDGFRB/PTN/PLPP3/TNS2/FARP1/DLC1/PTPN13/NT5E/PTPRD/RCAN2/PTPRG/PTPN14/NPNT/IGFBP3/SPRED1/ITGA1/PLPP1/ALPL/MYO1D/PPP1R14A/BOD1/HDDC2/NT5C3B/ROCK2/YWHAE/HSP90AB1/PPP2CB/PHPT1/DUSP14/NT5DC2/LGALS3/MTMR2/MEF2C/CAMTA1/RCAN1/CALM2/PPP1R14B/ATP1A1/PPP1R15A/HSP90B1/SET/CYCS
GO:0050727	regulation of inflammatory response	42/1382	479/17913	0.212485	0.442903	42	CLU/APOE/PLA2G2A/SERPINF1/CFH/SERPING1/APOD/C1R/C1S/NUPR1/MDK/LPL/A2M/AGT/SLC7A2/NT5E/OSMR/EGFR/PTGIS/IL1R1/CD81/IL6ST/SOCS3/APP/KLF4/NFE2L1/SOD1/CD59/TNFRSF1A/MGLL/IGF1/GPX4/GSTP1/PARK7/SPHK1/CUEDC2/PHB/RPS19/TGM2/C1QBP/TNFAIP6/PSMA1
GO:0006397	mRNA processing	42/1382	499/17913	0.29895	0.540777	42	RBFOX2/APP/ZFP36L1/ADARB1/LGALS3/NBDY/POLR2F/GTF2H5/AHCYL1/PRDX6/NSRP1/POLR2H/POLR2E/YBX1/SNRPN/POLR2I/SAP18/DDX1/SNRNP70/SNRPE/C1QBP/HSPA8/HNRNPA0/SF3B6/POLR2L/HNRNPA1/ZCRB1/HNRNPR/SNRPD1/POLR2K/ARL6IP4/LSM2/LSM3/SNRPF/SRRM2/SNRPD2/HTATSF1/LSM5/FUS/SRSF7/SNU13/TXNL4A
GO:0060348	bone development	41/1382	189/17913	1.0628e-09	7.57176e-08	41	COL1A1/SPARC/SFRP4/FOXC1/FBN1/GJA1/SERPINH1/CHAD/DLX5/PLS3/FAM20C/SULF1/LOX/MMP14/TWIST1/TMEM119/SOX9/FGFR3/COL27A1/COL13A1/SHOX2/RUNX2/ANXA2/COMP/ALPL/TULP3/PDGFC/ENG/VKORC1/SMAD5/BMPR2/DHRS3/PPIB/PAPSS2/IGF1/SBDS/MEF2C/TRIP11/COL2A1/GNAS/INSIG2
GO:0071356	cellular response to tumor necrosis factor	41/1382	266/17913	1.57564e-05	0.000296058	41	COL1A1/VCAM1/GAS6/SFRP1/CCDC3/TNFRSF11B/NPNT/AKAP12/LTBR/HSPA1B/TNFRSF12A/PSMB5/THBS1/CCL2/YBX3/ZFP36L1/TNFSF12/TNFRSF1A/ILK/GSTP1/HSPA1A/PSMC3/SPPL2A/PSMB6/SPHK1/PSMB1/RACK1/PSMD8/PSMD2/RPS3/PSMA3/PSMC5/PSMD3/PSMB7/PSMC1/KLF2/PSMA2/PSMA1/PSMC4/ZFP36/PSME2
GO:0007548	sex differentiation	41/1382	269/17913	2.06611e-05	0.000370367	41	FOXC1/PDGFRB/NUPR1/PDGFRA/ADAMTS1/GJA1/RHOBTB3/CCND1/SFRP1/AXL/BMP5/RBP4/MMP14/SLIT2/SLIT3/SOX9/KITLG/HOXA10/CST3/PBX1/ANG/PRDX4/PKD1/ARID5B/SMAD5/SOD1/YBX3/RAB13/CTNNA1/AKR1C3/CTNNB1/PHB/FKBP4/DNAJC19/UBB/ERCC1/VEGFA/INHBA/FLNA/HSPA5/EIF2S2
GO:0034612	response to tumor necrosis factor	41/1382	284/17913	7.34764e-05	0.00105506	41	COL1A1/VCAM1/GAS6/SFRP1/CCDC3/TNFRSF11B/NPNT/AKAP12/LTBR/HSPA1B/TNFRSF12A/PSMB5/THBS1/CCL2/YBX3/ZFP36L1/TNFSF12/TNFRSF1A/ILK/GSTP1/HSPA1A/PSMC3/SPPL2A/PSMB6/SPHK1/PSMB1/RACK1/PSMD8/PSMD2/RPS3/PSMA3/PSMC5/PSMD3/PSMB7/PSMC1/KLF2/PSMA2/PSMA1/PSMC4/ZFP36/PSME2
GO:0070371	ERK1 and ERK2 cascade	41/1382	289/17913	0.000108831	0.00147505	41	FN1/APOE/PLA2G2A/FBLN1/LRP1/TIMP3/PDGFRB/GAS6/CAVIN3/PDGFRA/EMILIN1/ERRFI1/ACKR3/RRAS/AGT/NDRG2/ANGPT1/NRP1/SOX9/PDGFA/CAMK2N1/FGFR3/EGFR/NPNT/GPNMB/AKAP12/SPRED1/ITGAV/APP/KLF4/JUN/ATF3/ZFP36L1/IGF1/SPRY1/MYC/GSTP1/MIF/SHC1/PHB/PHB2
GO:0045930	negative regulation of mitotic cell cycle	41/1382	308/17913	0.000427715	0.00450154	41	FOXC1/FHL1/CCND1/GAS1/FAP/EGFR/GPNMB/KANK2/SOX4/PSMB5/KLF4/CCL2/TIMP2/ZFP36L1/MAP3K20/CDKN1A/GADD45GIP1/CTNNB1/RPL24/PRMT1/PSMC3/PSMB6/RPS27L/PSMB1/SKP1/PSMD8/PSMG2/NOP53/RPL26/PSMD2/BTG3/PSMA3/PSMC5/PSMD3/PSMB7/PSMC1/PSMA2/PSMA1/GADD45A/PSMC4/PSME2
GO:0045861	negative regulation of proteolysis	41/1382	324/17913	0.0011795	0.0102574	41	TIMP1/CRYAB/SERPINE2/SERPING1/COL6A3/TIMP3/GAS6/TFPI/BEX3/A2M/TMEM98/GAS1/ITIH5/NGFR/CAMK2N1/MAP1A/CST3/CRIM1/APP/THBS1/PEBP1/KLF4/TIMP2/CD109/CD59/YWHAE/HSP90AB1/RPL5/PARK7/TMEM59/ERLEC1/IFI16/CAMLG/RPL11/OS9/SERPINB6/PRDX3/NOP53/VEGFA/IFI6/UBXN1
GO:0006520	cellular amino acid metabolic process	41/1382	347/17913	0.00417943	0.0276819	41	GGT5/PLOD2/CDO1/HNMT/CKB/SLC7A2/ALDH7A1/GFPT2/PCYOX1/PRDX4/PSMB5/GCSH/DDAH2/COMT/SLC1A3/CRTAP/PHGDH/PARK7/ADI1/BCAT1/PSMC3/PSMB6/PSMB1/PTS/SARS/PSMD8/PPA1/OAT/PSMD2/PEPD/P4HB/PSMA3/PSMC5/PSMD3/PSMB7/PSMC1/PSMA2/TXN2/PSMA1/PSMC4/PSME2
GO:1901653	cellular response to peptide	41/1382	364/17913	0.00935729	0.0511796	41	LRP1/VCAM1/RARRES2/BGLAP/MAP1B/FBN1/ID1/CAV1/LPL/ERRFI1/ENPP1/FOXC2/CAV2/AGT/PDK4/NGFR/GHR/PTK2/BACE1/VIM/APP/MYO1C/LEPROT/KLF4/ADCY3/ZFP36L1/RAB13/ROCK2/NUCKS1/IGF1/GSTP1/SHC1/CHMP5/FIS1/AHCYL1/KLF10/NR4A1/USO1/KLF2/EIF4EBP1/APRT
GO:0022407	regulation of cell-cell adhesion	41/1382	389/17913	0.0257426	0.107074	41	CXCL12/LGALS1/SERPINE2/VCAM1/CAV1/THY1/PLPP3/MDK/HES1/C1QTNF1/PDPN/SNAI2/PRKG1/PDE5A/ZNF703/EFNA5/CD276/GPNMB/JAG1/CD9/TWSG1/SDC4/PTK2/CD81/MYO10/IL6ST/PAWR/KLF4/CCL2/AFDN/BAD/IGF1/RDX/LGALS3/PRDX2/KIFAP3/SMAD7/IGFBP2/YES1/HSPD1/RPS3
GO:0007389	pattern specification process	41/1382	408/17913	0.049194	0.167918	41	FOXC1/FGFR1/HES1/NBL1/NR2F2/GJA1/MDFI/NRP2/SFRP1/FOXC2/BMP5/SATB2/BICC1/IRX3/NRP1/TBX2/DAAM2/HOXA10/FOXD1/INTU/DYNC2H1/HEY2/SIX1/MAFB/SMARCD3/ASPH/PBX1/TULP3/ENG/AHI1/SNAI1/PCSK5/SMAD5/BMPR2/DPCD/SPRY1/IFT57/MEF2C/CTNNB1/ZEB1/TMED2
GO:0043087	regulation of GTPase activity	41/1382	410/17913	0.0523732	0.17703	41	RGS5/THY1/ERRFI1/NTRK2/RGS3/SFRP1/CAV2/SLIT2/DLC1/NRP1/SRGAP1/EPHA3/PRKG1/SYDE1/DOCK1/EFNA5/PTK2/RIN2/ITGB1/SRGAP3/CHN1/RGS16/PLXNB2/ARHGAP21/S100A10/SOD1/NET1/JUN/AFDN/HACD3/ARHGAP10/ARHGEF12/FAM13A/SPRY1/RDX/ARL2/SNX9/RACK1/ARHGAP5/RANBP1/TMED2
GO:0008380	RNA splicing	41/1382	440/17913	0.119505	0.30796	41	RBFOX2/AHNAK/LGALS3/HSPA1A/POLR2F/PRDX6/NSRP1/POLR2H/POLR2E/YBX1/SNRPN/POLR2I/SAP18/DDX1/SNRNP70/SNRPE/C1QBP/RTRAF/HSPA8/HNRNPA0/SF3B6/LUC7L3/POLR2L/HNRNPA1/ZCRB1/HNRNPR/SNRPD1/POLR2K/ARL6IP4/LSM2/LSM3/SNRPF/SRRM2/SNRPD2/HTATSF1/LSM5/RPS13/FUS/SRSF7/SNU13/TXNL4A
GO:0045088	regulation of innate immune response	41/1382	440/17913	0.119505	0.30796	41	APOE/SERPING1/CAV1/S100A1/CTSK/A2M/CTSL/COLEC12/CADM1/SOCS3/HSPA1B/PSMB5/NECTIN2/HSP90AB1/HSPA1A/PSMC3/PSMB6/PSMB1/CTSB/SKP1/IFI16/PSMD8/HEXIM1/RPS27A/UBB/HSPD1/NOP53/RPS19/C1QBP/PSMD2/RFTN1/PSMA3/PSMC5/PSMD3/PSMB7/PSMC1/PSMA2/PSMA1/HSP90B1/PSMC4/PSME2
GO:0006914	autophagy	41/1382	471/17913	0.229817	0.466799	41	DCN/CLU/LEPR/NUPR1/CTSK/CTTN/SYNPO2/SRPX/HSPB1/FEZ1/DEPP1/PTK2/BAG3/RETREG1/BNIP3/DYNLL1/BAD/RRAGA/PARK7/TMEM59/FIS1/TRIM8/DAP/MVB12A/SCOC/IFI16/EEF1A1/ABL2/VDAC1/RHEB/OPTN/SQSTM1/SNRNP70/HSP90AA1/STUB1/TOMM20/HSPA8/TMEM208/RNF5/ATG101/TOMM7
GO:0061919	process utilizing autophagic mechanism	41/1382	471/17913	0.229817	0.466799	41	DCN/CLU/LEPR/NUPR1/CTSK/CTTN/SYNPO2/SRPX/HSPB1/FEZ1/DEPP1/PTK2/BAG3/RETREG1/BNIP3/DYNLL1/BAD/RRAGA/PARK7/TMEM59/FIS1/TRIM8/DAP/MVB12A/SCOC/IFI16/EEF1A1/ABL2/VDAC1/RHEB/OPTN/SQSTM1/SNRNP70/HSP90AA1/STUB1/TOMM20/HSPA8/TMEM208/RNF5/ATG101/TOMM7
GO:0051216	cartilage development	40/1382	182/17913	1.12945e-09	7.94476e-08	40	COL1A1/MGP/LUM/TIMP1/SNORC/FRZB/FGFR1/ACAN/COL11A1/MDK/PRRX1/SERPINH1/PTH1R/CTSK/EFEMP1/SULF1/BMP5/NFIB/SATB2/SNAI2/SOX9/SCIN/FGFR3/COL27A1/SHOX2/TGFBI/RUNX2/COMP/THRA/PKD1/SNAI1/SMAD5/BMPR2/TRPS1/MEF2C/TRIP11/CTNNB1/COL2A1/ZEB1/GNAS
GO:0097305	response to alcohol	40/1382	232/17913	1.21156e-06	3.50658e-05	40	SPARC/IGFBP7/TNC/VCAM1/BGLAP/CDO1/EPS8/CCND1/SFRP1/RBP4/SLIT2/SLIT3/AKR1C2/PTGFR/EFNA5/KLF9/KLF4/ADCY3/NFE2L1/SOD1/GSN/CTNNA1/SDF4/BAD/AKR1C3/MGMT/SETD7/CDKN1A/GSTP1/CTNNB1/FOSB/RPL10A/EEF2/PHB/TUFM/INHBA/KLF2/FOS/AHR/EIF4EBP1
GO:0034976	response to endoplasmic reticulum stress	40/1382	254/17913	1.18996e-05	0.000235325	40	CLU/LMNA/NUPR1/CAV1/CCND1/RCN3/SRPX/KDELR3/THBS1/CCL2/NFE2L1/JUN/ATF3/PPP2CB/ACADVL/MYDGF/YIF1A/PARK7/HSPA1A/SHC1/CALR/SEC31A/ERLEC1/PDIA6/EEF2/RACK1/TMCO1/OS9/MBTPS1/ATP2A2/MANF/STUB1/P4HB/HSPA5/PPP1R15A/RNF5/UBXN1/HSP90B1/SEC61B/SDF2L1
GO:0045666	positive regulation of neuron differentiation	40/1382	355/17913	0.0101125	0.0543999	40	FN1/APOE/CXCL12/SERPINF1/LRP1/FGFR1/MAP1B/PTN/MDK/NBL1/NTRK2/BMP5/SLIT2/AGT/IRX3/DPYSL3/NRP1/NGFR/PTPRD/EPHA3/NDNF/EFNA5/SHOX2/FEZ1/TNFRSF12A/TIMP2/PLXNB2/SCARB2/TCF4/BMPR2/ILK/METRN/MEF2C/TMEM106B/ZEB1/STK25/ABL2/NME1/VEGFA/HSPA5
GO:1904951	positive regulation of establishment of protein localization	40/1382	440/17913	0.15737	0.371969	40	LRP1/GAS6/MDK/GJA1/LPL/RBP4/TWIST1/EGFR/AKAP12/CADM1/CD81/SOX4/TCF7L2/ANG/BAG3/MYO1C/LEPROT/MYH10/YWHAE/PHPT1/BAD/IGF1/YWHAQ/PDCD5/MIF/FIS1/RACK1/CCT3/RAN/SRI/CCT7/CCT4/TCP1/PPIA/FLNA/CCT6A/CCT2/CCT8/TOMM7/CCT5
GO:0001819	positive regulation of cytokine production	40/1382	446/17913	0.178954	0.398103	40	CLU/LUM/LRP1/CYP1B1/MDK/LPL/SULF1/AGT/TWIST1/CD276/IL1R1/AKAP12/HSPB1/CADM1/EGR1/CD81/IL6ST/HSPA1B/HILPDA/APP/THBS1/SOD1/ZBTB20/ROCK2/MIF/PARK7/HSPA1A/POLR2F/CTNNB1/SPHK1/POLR2H/IFI16/POLR2E/HSPD1/DDX1/NOP53/C1QBP/RPS3/POLR2L/POLR2K
GO:0001763	morphogenesis of a branching structure	39/1382	192/17913	1.88325e-08	9.64909e-07	39	TNC/FGFR1/FGF7/MDK/PGF/SFRP1/SULF1/FOXC2/MMP14/COL4A1/SLIT2/AGT/CSF1/NRP1/SNAI2/YAP1/SOX9/PDGFA/EDNRA/FOXD1/NPNT/COL13A1/NTN4/SIX1/SHOX2/CLIC4/PBX1/SOCS3/ENG/PKD1/MAGED1/ILK/SPRY1/MYC/CTNNB1/PLXND1/PHB2/TGM2/VEGFA
GO:0071229	cellular response to acid chemical	39/1382	199/17913	5.23339e-08	2.32656e-06	39	COL1A1/COL1A2/COL3A1/SERPINF1/ID3/COL6A1/TNC/COL5A2/MMP2/PDGFRA/LPL/NTRK2/SFRP1/COL4A1/PDK4/AKR1C1/YAP1/COL16A1/SOX9/AKR1C2/EPHA3/PTGFR/EGFR/SIX1/EGR1/PDGFC/KLF4/PDGFD/AKR1C3/RRAGA/ZEB1/CAPN2/ABL2/PHB2/YES1/NME1/NDUFA13/VEGFA/KLF2
GO:0044706	multi-multicellular organism process	39/1382	225/17913	1.43106e-06	4.05916e-05	39	IGFBP5/IGFBP7/TIMP1/FBLN1/SERPINE2/EMP2/MMP2/PTN/NR2F2/GJA1/PGF/AGT/COL16A1/PAPPA/PTGFR/SYDE1/PTGIS/MAGED2/CST3/PAM/COMT/PCSK5/SOD1/BMPR2/SPP1/CALR/RPL29/FOSB/ANGPT2/CTSB/CAPN2/FKBP4/IGFBP2/PRDX3/JUNB/C1QBP/TMED2/HEXB/FOS
GO:0048863	stem cell differentiation	39/1382	237/17913	5.28005e-06	0.000120251	39	FN1/FOXC1/FRZB/PTN/PDGFRA/HES1/LTBP3/A2M/NRP2/SFRP1/FOXC2/TWIST1/NRP1/SNAI2/YAP1/SOX9/KITLG/TBX2/EDNRA/JAG1/RUNX2/PSMB5/MEF2C/PSMC3/PSMB6/PSMB1/PSMD8/OCIAD1/PSMD2/PSMA3/LBH/PSMC5/PSMD3/PSMB7/PSMC1/PSMA2/PSMA1/PSMC4/PSME2
GO:0090257	regulation of muscle system process	39/1382	251/17913	2.08659e-05	0.000371641	39	IGFBP5/MYL9/TPM1/LMNA/CAV1/ERRFI1/AGT/CTTN/PLN/SSTR2/PRKG1/NPNT/HSPB6/PDE5A/ANK2/PTK2/IL6ST/LMCD1/C12orf57/KLF4/SOD1/FBXO32/CAMK2D/ROCK2/TNFRSF1A/GUCY1A1/IGF1/SPHK1/MEF2A/SMAD7/SRI/CALM2/ATP2A2/GSTO1/ATP1A1/FLNA/AKAP9/GLRX3/ENO1
GO:0072593	reactive oxygen species metabolic process	39/1382	269/17913	9.93308e-05	0.00136292	39	CLU/CRYAB/CYP1B1/PDGFRB/CAV1/GPX3/AGT/SLC7A2/PDK4/EGFR/PLA2R1/PTGIS/SH3PXD2A/THBS1/PRDX1/DDAH2/KLF4/BNIP3/SOD1/NDUFS4/ROCK2/HSP90AB1/AKR1C3/CDKN1A/GSTP1/PARK7/PRDX2/NDUFAF2/VDAC1/PRDX3/ARF4/NDUFA13/EIF6/HSP90AA1/CCS/IFI6/KLF2/GADD45A/DDIT4
GO:0010721	negative regulation of cell development	39/1382	317/17913	0.002553	0.0186426	39	COL3A1/APOE/LGALS1/FBLN1/LRP1/FRZB/ID4/FBN1/ID1/PTN/THY1/HES1/PMP22/NOTCH3/TMEM98/SLIT2/IRX3/DPYSL3/NRP1/SOX9/NGFR/DAAM2/PTPRG/EFNA5/DIXDC1/JAG1/S1PR3/PTK2/PBX1/VIM/APP/SPP1/CTNNA1/IGF1/RYK/CALR/CTNNB1/FKBP4/ITM2C
GO:1903829	positive regulation of cellular protein localization	39/1382	318/17913	0.00269941	0.0195321	39	LRP1/GAS6/PTN/EPB41L2/NGFR/EPHA3/EGFR/MAP1A/CD81/TCF7L2/BAG3/ITGB1/MYO1C/LEPROT/ROCK2/YWHAE/HSP90AB1/BAD/RDX/YWHAQ/PDCD5/LGALS3/PARK7/FIS1/TRIM8/RER1/RACK1/CCT3/RAN/CCT7/SQSTM1/CCT4/TCP1/FLNA/CCT6A/CCT2/CCT8/TOMM7/CCT5
GO:0043405	regulation of MAP kinase activity	39/1382	322/17913	0.00335972	0.023396	39	APOE/FGFR1/PDGFRB/CAV1/RGS3/SFRP1/FZD8/KITLG/SASH1/MAPK10/GHR/PDGFA/EGFR/PDE5A/CSPG4/SPRED1/ITGA1/CD81/THBS1/GADD45B/MAGED1/SOD1/HACD3/ILK/MAP3K20/DUSP14/IGF1/GSTP1/MIF/PRDX2/SHC1/PEA15/MDFIC/RPS27A/UBB/VEGFA/RPS3/DNAJA1/GADD45A
GO:0009165	nucleotide biosynthetic process	39/1382	360/17913	0.0197604	0.0884841	39	NNMT/NUPR1/PDK4/PTGIS/AK1/NME3/ADCY3/ZBTB20/GUCY1A1/NME4/PAPSS2/IGF1/ATP5MC3/PAPSS1/ATP5PF/LDHA/ADK/ERH/TPI1/STOML2/ATP5MC1/NME1/EIF6/PKM/ATP5F1C/CMPK1/MPC1/IMPDH2/UQCC3/PFKP/PGAM1/ATP5PO/ATP5F1D/ATP5F1B/ATP5MF/ATP5ME/DDIT4/ENO1/APRT
GO:1901293	nucleoside phosphate biosynthetic process	39/1382	365/17913	0.0240377	0.101913	39	NNMT/NUPR1/PDK4/PTGIS/AK1/NME3/ADCY3/ZBTB20/GUCY1A1/NME4/PAPSS2/IGF1/ATP5MC3/PAPSS1/ATP5PF/LDHA/ADK/ERH/TPI1/STOML2/ATP5MC1/NME1/EIF6/PKM/ATP5F1C/CMPK1/MPC1/IMPDH2/UQCC3/PFKP/PGAM1/ATP5PO/ATP5F1D/ATP5F1B/ATP5MF/ATP5ME/DDIT4/ENO1/APRT
GO:0051249	regulation of lymphocyte activation	39/1382	401/17913	0.0794952	0.232625	39	LGALS1/VCAM1/GAS6/CAV1/THY1/MDK/HES1/SFRP1/AXL/MMP14/PDE5A/CD276/GPNMB/TWSG1/SDC4/CD81/IL6ST/PAWR/CCL2/SOD1/GSN/ZFP36L1/BAD/IGF1/CDKN1A/LGALS3/MIF/PRDX2/MEF2C/CTNNB1/ZEB1/SMAD7/IGFBP2/YES1/HSPD1/INHBA/RPS3/PRELID1/AHR
GO:0070838	divalent metal ion transport	39/1382	454/17913	0.26319	0.498826	39	CXCL12/PDGFRB/GAS6/CAV1/THY1/GJA1/S100A1/SLC39A14/GEM/AGT/PLN/RAMP1/TUSC3/ANK2/MYLK/ANXA2/SLC39A1/ITGAV/AHNAK/ANXA5/PKD1/CCL2/RRAD/CAMK2D/YWHAE/SESTD1/LGALS3/CTNNB1/PHB/TMCO1/VDAC1/SRI/CALM2/STOML2/TMEM165/PHB2/ATP2A2/ISCU/GSTO1
GO:0072511	divalent inorganic cation transport	39/1382	458/17913	0.281751	0.522434	39	CXCL12/PDGFRB/GAS6/CAV1/THY1/GJA1/S100A1/SLC39A14/GEM/AGT/PLN/RAMP1/TUSC3/ANK2/MYLK/ANXA2/SLC39A1/ITGAV/AHNAK/ANXA5/PKD1/CCL2/RRAD/CAMK2D/YWHAE/SESTD1/LGALS3/CTNNB1/PHB/TMCO1/VDAC1/SRI/CALM2/STOML2/TMEM165/PHB2/ATP2A2/ISCU/GSTO1
GO:0015672	monovalent inorganic cation transport	39/1382	477/17913	0.375772	0.621848	39	NDUFA4L2/SERPINE2/CAV1/FXYD1/COX7A1/FHL1/TWIST1/KCNMA1/ANK2/MAGED2/CD63/SLC1A3/CAMK2D/YWHAE/PARK7/ATP5MC3/AHCYL1/ATP5PF/CYB5A/COX6C/CHCHD10/NDUFA4/SLC25A3/STOML2/PHB2/ATP2A2/ATP5MC1/ATP5F1C/ATP1A1/COX6A1/FLNA/AKAP9/ATP5PO/ATP5F1D/ATP5F1B/ATP5MF/COX7C/ATP5ME/SLC5A3
GO:0050821	protein stabilization	38/1382	171/17913	2.10779e-09	1.33102e-07	38	CLU/CRYAB/PLPP3/PFN2/ANK2/SOX4/HSPA1B/BAG3/SAV1/STXBP1/CRTAP/HSP90AB1/PPIB/IGF1/RPL5/CDKN1A/PARK7/HSPA1A/CALR/CCT3/CAMLG/SMAD7/PHB/RPL11/PTGES3/CCT7/PHB2/PRKRA/HSPD1/NOP53/HSP90AA1/CCT4/TCP1/FLNA/CCT6A/CCT2/CCT8/CCT5
GO:1901654	response to ketone	38/1382	191/17913	5.1027e-08	2.28675e-06	38	IGFBP7/SERPINF1/TNC/BGLAP/CAV1/PTN/ERRFI1/CCND1/SFRP1/SLIT2/SLIT3/PLN/YAP1/AKR1C2/PTGFR/EGFR/EFNA5/KLF9/THBS1/KLF4/ADCY3/FBXO32/ROCK2/SPP1/BAD/AKR1C3/CDKN1A/PARK7/CALR/FOSB/RWDD1/NME1/KLF2/TXNIP/FOS/AHR/DDIT4/EIF4EBP1
GO:0060541	respiratory system development	38/1382	193/17913	6.80652e-08	2.93208e-06	38	SPARC/IGFBP5/TNC/FGFR1/PDGFRB/EPAS1/ID1/PTN/FGF7/PDGFRA/HES1/ERRFI1/DLX5/RCN3/RBP4/LOX/MMP14/NFIB/PDPN/YAP1/SOX9/ALDH1A3/PDGFA/ADAMTS2/EGFR/SIX1/TULP3/TNS3/CRISPLD2/SAV1/PKD1/BMPR2/SPRY1/CTNNB1/PHF14/VEGFA/KLF2/EIF4EBP1
GO:0009612	response to mechanical stimulus	38/1382	200/17913	1.79458e-07	6.87759e-06	38	COL1A1/DCN/COL3A1/CXCL12/SERPINE2/TNC/BGLAP/MAP1B/COL11A1/PTN/MDK/GJA1/MMP14/AGT/TMEM150C/SOX9/EGFR/NRXN2/BACE1/LTBR/BAG3/THBS1/ENG/PKD1/BNIP3/SLC1A3/JUN/TNFRSF1A/BAD/SUN1/FOSB/ANGPT2/IGFBP2/ATP1A1/TXNIP/FOS/GADD45A/ACTG1
GO:0033002	muscle cell proliferation	38/1382	243/17913	2.2883e-05	0.000399877	38	IGFBP5/TPM1/FOXC1/APOD/FGFR1/PDGFRB/MMP2/ADAMTS1/GJA1/OGN/NOTCH3/FOXC2/RBP4/AGT/NDRG2/ANGPT1/YAP1/TBX2/PRKG1/HEY2/EGFR/SIX1/IGFBP3/TCF7L2/ANG/SAV1/THBS1/KLF4/PDGFD/COMT/JUN/ILK/IGF1/CDKN1A/GSTP1/MEF2C/CTNNB1/TGM2
GO:0045926	negative regulation of growth	38/1382	244/17913	2.5131e-05	0.000428384	38	IGFBP5/MT2A/MT1E/MT1M/CRYAB/SERPINE2/FRZB/GJA1/ENPP1/FHL1/MT1A/SFRP1/RBP4/SLIT2/AGT/SLIT3/NRP1/FGFR3/RERG/MEG3/PTK2/MT1X/HSPA1B/SAV1/APBB2/BMPR2/SPP1/RYK/CDKN1A/HSPA1A/EI24/MT1F/RACK1/PHB/SQSTM1/NDUFA13/INHBA/ENO1
GO:0043491	protein kinase B signaling	38/1382	268/17913	0.000193201	0.00242705	38	IGFBP5/FGFR1/PDGFRB/GAS6/CAVIN3/FGF7/PDGFRA/RRAS/RCN3/C1QTNF1/AXL/LOX/ANGPT1/SOX9/KITLG/AKR1C2/PDGFA/FGFR3/PHLDA3/EGFR/PTK2/TCF7L2/ITGB1/THBS1/ENG/KLF4/CCL2/ZFP36L1/HSP90AB1/ILK/IGF1/AKR1C3/MYDGF/PARK7/RACK1/NOP53/HSP90AA1/C1QBP
GO:1901214	regulation of neuron death	38/1382	313/17913	0.00361011	0.0247061	38	CLU/APOE/SERPINF1/LRP1/NUPR1/MDK/CHL1/NTRK2/AXL/CSF1/ANGPT1/UNC5B/NRP1/NDNF/SIX1/GPNMB/ITGA1/EGR1/BACE1/STXBP1/RETREG1/CCL2/SOD1/JUN/HSP90AB1/ILK/BAD/PARK7/MEF2C/CTNNB1/FIS1/CAPN2/RACK1/UBB/PSMC1/FOS/SET/DDIT4
GO:0032535	regulation of cellular component size	38/1382	315/17913	0.00402046	0.0269502	38	FN1/APOE/CXCL12/DSTN/LRP1/MAP1B/EPS8/PLEKHH2/SLIT2/CTTN/CDC42EP5/NRP1/NCKAP1/PFN2/LMOD1/KCNMA1/SCIN/KIRREL1/EFNA5/LIMA1/ABI2/TNFRSF12A/MYO1C/WASL/GSN/BMPR2/HSP90AB1/SPP1/ILK/CFL2/AKT3/RYK/RDX/DPYSL2/SNX9/VEGFA/AP2M1/PPP1R15A
GO:0007265	Ras protein signal transduction	38/1382	324/17913	0.00639375	0.0382867	38	COL1A2/COL3A1/APOE/PDGFRB/EPS8/RRAS/PDPN/CSF1/FARP1/DLC1/NRP1/NCKAP1/KITLG/NGFR/PSD3/MRAS/ARHGEF17/RHOB/ABI2/KANK2/ITGB1/TIMP2/NET1/JUN/ROCK2/HACD3/PPP2CB/ARHGEF12/CTNNAL1/IGF1/RDX/CDKN1A/PARK7/SHC1/ARHGAP5/ABL2/SQSTM1/RALA
GO:0048638	regulation of developmental growth	38/1382	325/17913	0.00671841	0.0396329	38	FN1/APOE/CXCL12/FOXC1/LRP1/FGFR1/MAP1B/GJA1/SFRP1/FOXC2/RBP4/CTTN/CSF1/NRP1/YAP1/TBX2/GHR/FGFR3/HEY2/EFNA5/SIX1/PTK2/TNFRSF12A/SAV1/APP/PHLDA2/SOD1/YBX3/BMPR2/SPP1/ILK/PPIB/IGF1/RYK/DPYSL2/CDKN1A/MEF2C/VEGFA
GO:0007596	blood coagulation	38/1382	331/17913	0.00897001	0.0493528	38	COL1A1/COL1A2/COL3A1/APOE/MYL9/FBLN1/SERPINE2/SERPING1/GAS6/CAV1/PDGFRA/TFPI/A2M/C1QTNF1/PDPN/EHD2/PDGFA/PROCR/PRKG1/FAP/DOCK1/CSRP1/CD9/HSPB1/COMP/THBS1/STXBP1/ANXA5/VKORC1/CD59/ILK/PAPSS2/PRDX2/LMAN1/GNAS/C1QBP/FLNA/ACTG1
GO:0007599	hemostasis	38/1382	336/17913	0.0112951	0.0588254	38	COL1A1/COL1A2/COL3A1/APOE/MYL9/FBLN1/SERPINE2/SERPING1/GAS6/CAV1/PDGFRA/TFPI/A2M/C1QTNF1/PDPN/EHD2/PDGFA/PROCR/PRKG1/FAP/DOCK1/CSRP1/CD9/HSPB1/COMP/THBS1/STXBP1/ANXA5/VKORC1/CD59/ILK/PAPSS2/PRDX2/LMAN1/GNAS/C1QBP/FLNA/ACTG1
GO:0050817	coagulation	38/1382	337/17913	0.0118149	0.0605701	38	COL1A1/COL1A2/COL3A1/APOE/MYL9/FBLN1/SERPINE2/SERPING1/GAS6/CAV1/PDGFRA/TFPI/A2M/C1QTNF1/PDPN/EHD2/PDGFA/PROCR/PRKG1/FAP/DOCK1/CSRP1/CD9/HSPB1/COMP/THBS1/STXBP1/ANXA5/VKORC1/CD59/ILK/PAPSS2/PRDX2/LMAN1/GNAS/C1QBP/FLNA/ACTG1
GO:0006066	alcohol metabolic process	38/1382	339/17913	0.0129134	0.0647653	38	APOE/LEPR/CYP1B1/FGFR1/PTH1R/BMP5/RBP4/DKK3/AKR1C1/AKR1C2/ALDH1A3/LIMA1/APP/MYOF/ISYNA1/CYB5R3/NFE2L1/SOD1/DHRS3/ACADVL/IGF1/HDLBP/AKR1C3/MTMR2/PARK7/ADH5/ALDH2/SPHK1/CES1/PTS/INSIG2/ACAA2/RAN/NUDT4/MBTPS1/CNBP/AKR1A1/FDPS
GO:0002429	immune response-activating cell surface receptor signaling pathway	38/1382	399/17913	0.103646	0.277161	38	THY1/NCKAP1/DOCK1/PTK2/CD81/MYO10/PAWR/PSMB5/MYO1C/WASL/NECTIN2/HSP90AB1/PHPT1/LGALS3/ARPC1A/MEF2C/PSMC3/PSMB6/PSMB1/SKP1/PSMD8/STOML2/YES1/HSP90AA1/PSMD2/RPS3/RFTN1/PSMA3/PSMC5/PSMD3/PSMB7/PSMC1/PSMA2/PSMA1/EIF2B1/PSMC4/PSME2/ACTG1
GO:0023061	signal release	38/1382	433/17913	0.224414	0.457976	38	CPE/SELENOM/LRP1/FGFR1/GJA1/C1QTNF1/SFRP1/RBP4/AGT/PFN2/FOXD1/PPFIA2/EGFR/EFNA5/NRXN2/SNCG/LTBP4/BACE1/SOX4/TCF7L2/STXBP1/SPP1/PHPT1/BAD/ARL2/PARK7/HMGN3/MEF2C/PNKD/NDUFAF2/GNAS/SRI/SLC25A6/ATP2A2/INHBA/HSPA8/JAGN1/SLC25A5
GO:0034660	ncRNA metabolic process	38/1382	470/17913	0.405433	0.653255	38	CAVIN1/ANG/RPL5/SBDS/POLR2F/GTF2H5/SNAPC1/POLR2H/SARS/RAN/RPS2/RPL11/POLR2E/SSB/PHAX/PPA1/RPL14/POLR2I/PRKRA/RPS9/TRMT112/FAM207A/DDX1/PA2G4/NOP53/NHP2/RPS19/RPL26/RPS16/RTRAF/NCL/POLR2L/GTF3C6/RPL35A/POLR2K/NSA2/SNU13/RPS17
GO:0060627	regulation of vesicle-mediated transport	38/1382	480/17913	0.458548	0.707427	38	CLU/APOE/SFRP4/LRP1/GAS6/CAV1/MFGE8/CD151/TF/AXL/GAS1/ANGPT1/NRP1/PFN2/EHD2/EPHA3/DAB2/ANXA2/SDC4/BACE1/CD63/ITGAV/STXBP1/AHI1/CCL2/SOD1/WASL/RDX/LGALS3/MTMR2/CALR/LRPAP1/SPHK1/RACK1/ABL2/ATP2A2/RALA/VEGFA
GO:0090090	negative regulation of canonical Wnt signaling pathway	37/1382	169/17913	5.26827e-09	2.98732e-07	37	APOE/SFRP4/IGFBP4/FRZB/CAV1/IGFBP6/MDK/SFRP1/RBMS3/WWTR1/DKK3/BICC1/SNAI2/SOX9/DAB2/EGR1/TCF7L2/PSMB5/LZTS2/CTHRC1/CTNND1/PSMC3/PSMB6/PSMB1/PSMD8/IGFBP2/PSMD2/PSMA3/PSMC5/PSMD3/PSMB7/PSMC1/PSMA2/PSMA1/PSMC4/PSME2/PFDN5
GO:0035966	response to topologically incorrect protein	37/1382	175/17913	1.42282e-08	7.67633e-07	37	CLU/LMNA/SERPINH1/CCND1/HSPB2/HSPB1/COMP/BAG3/KDELR3/THBS1/CCL2/ATF3/HSP90AB1/ACADVL/DNAJB4/MYDGF/YIF1A/HSPA1A/SHC1/CALR/SEC31A/PDIA6/RACK1/HSPE1/MBTPS1/OPTN/HSPD1/MANF/HSP90AA1/STUB1/HSPA8/DNAJA1/HSPA5/PPP1R15A/RNF5/HSP90B1/SDF2L1
GO:0061138	morphogenesis of a branching epithelium	37/1382	178/17913	2.29018e-08	1.14653e-06	37	TNC/FGFR1/FGF7/MDK/PGF/SFRP1/SULF1/FOXC2/MMP14/COL4A1/SLIT2/AGT/CSF1/NRP1/SNAI2/YAP1/SOX9/PDGFA/EDNRA/FOXD1/NPNT/NTN4/SIX1/CLIC4/PBX1/SOCS3/ENG/PKD1/MAGED1/ILK/SPRY1/MYC/CTNNB1/PLXND1/PHB2/TGM2/VEGFA
GO:1905330	regulation of morphogenesis of an epithelium	37/1382	181/17913	3.63811e-08	1.72795e-06	37	FGFR1/FGF7/MDK/SFRP1/SULF1/AGT/SNAI2/SOX9/TBX2/PDGFA/NTN4/SIX1/DAB2/PSMB5/AHI1/MAGED1/PHLDB2/CTHRC1/RYK/CTNNB1/PSMC3/PSMB6/PSMB1/PSMD8/PHB2/VEGFA/PSMD2/AP2M1/PSMA3/PSMC5/PSMD3/PSMB7/PSMC1/PSMA2/PSMA1/PSMC4/PSME2
GO:0010001	glial cell differentiation	37/1382	212/17913	2.23248e-06	5.90919e-05	37	CLU/SERPINE2/LRP1/MXRA8/ID4/PTN/MDK/HES1/NTRK2/TMEM98/NFIB/LAMB2/LGI4/SOX9/DAAM2/WASF3/EGFR/PARD3/GPC1/CD9/SOX4/IL6ST/VIM/S100B/APP/BNIP3/NFE2L1/NDRG1/SOD1/GSN/ILK/METRN/PHGDH/GSTP1/CTNNB1/RHEB/EIF2B1
GO:2001234	negative regulation of apoptotic signaling pathway	37/1382	223/17913	7.5189e-06	0.000158869	37	CLU/CXCL12/LMNA/ACKR3/BMP5/CTTN/UNC5B/NRP1/SNAI2/YAP1/HSPB1/TCF7L2/HSPA1B/ITGAV/THBS1/SNAI1/YBX3/CTNNA1/IGF1/PTTG1IP/GSTP1/LGALS3/MIF/PARK7/HSPA1A/PRDX2/CTNNB1/COL2A1/ACAA2/VDAC2/PEA15/NDUFA13/DNAJA1/IFI6/PRELID1/ENO1/SLC25A5
GO:1903362	regulation of cellular protein catabolic process	37/1382	230/17913	1.53916e-05	0.000291915	37	CLU/APOE/LRP1/NUPR1/CAV1/MAP1A/DAB2/ANXA2/PTK2/CD81/PKD1/LAPTM4B/NFE2L1/HSP90AB1/RDX/PTTG1IP/MAGEF1/RPL5/PARK7/HSPA1A/ATRAID/PSMC3/ERLEC1/RACK1/CAMLG/SMAD7/RPL11/OS9/UBB/NOP53/HSP90AA1/STUB1/PSMC5/PSMC1/UBXN1/SUMO2/PSMC4
GO:0097237	cellular response to toxic substance	37/1382	241/17913	4.37762e-05	0.000687187	37	APOE/ADIRF/CYP1B1/AXL/CYGB/GPX3/GPX8/GSTM3/RHOB/CST3/EGR1/PAWR/PRDX4/SELENOW/KLF4/BNIP3/MGST3/PDGFD/SOD1/NET1/ESD/BAD/GPX4/GSTP1/PARK7/PRDX2/FIS1/PRDX6/SPHK1/RACK1/STK25/PRDX3/GSTO1/RPS3/AKR1A1/HNRNPA1/KLF2
GO:0010769	regulation of cell morphogenesis involved in differentiation	37/1382	260/17913	0.000216532	0.00266448	37	FN1/APOE/CXCL12/FBLN1/LRP1/MAP1B/ID1/THY1/MDK/NTRK2/SDC2/SLIT2/CTTN/PDPN/NRP1/NGFR/PTPRD/DOCK1/EFNA5/SHOX2/ABI2/PTK2/TNFRSF12A/CHN1/PDLIM5/S100A10/BMPR2/SPP1/ILK/METRN/RYK/DPYSL2/CALR/STK25/C1QBP/VEGFA/FLNA
GO:0006631	fatty acid metabolic process	37/1382	339/17913	0.0204888	0.0912311	37	CYP1B1/GGT5/PTGDS/CAV1/LPL/CYGB/TWIST1/PDK4/BDH2/AKR1C2/PTGR1/PTGIS/PAM/FADS3/NFE2L1/HACD3/TNFRSF1A/PON2/MGLL/ACADVL/GPX4/AKR1C3/CBR1/GSTP1/MIF/ECH1/CES1/ETFB/HADHB/INSIG2/ACAA2/PTGES3/ALKBH7/NDUFAB1/ECHS1/EIF6/HADHA
GO:0019932	second-messenger-mediated signaling	37/1382	360/17913	0.0451096	0.160124	37	APOE/MT2A/VCAM1/RASD1/PTH1R/AGT/PLN/SOX9/RCAN2/RAMP1/NDNF/PTGFR/PRKG1/EGFR/PDE5A/ANK2/LMCD1/THBS1/DDAH2/FHL2/ADCY3/CAMK2D/NDUFS4/GUCY1A1/IGF1/CAMTA1/FIS1/RCAN1/SPHK1/GNAS/NUDT4/SRI/CALM2/GSTO1/VEGFA/AHR/HINT1
GO:0032386	regulation of intracellular transport	37/1382	400/17913	0.143112	0.348041	37	CRYAB/APOD/MAP1B/GAS6/GAS1/PLN/ANGPT1/PFN2/EHD2/PTPN14/FEZ1/DAB2/ANXA2/BACE1/CD81/TCF7L2/BAG3/STXBP1/MYO1C/LEPROT/PKIG/YWHAE/NUCB1/RDX/PDCD5/MTMR2/PARK7/IFI27/LMAN1/FIS1/ERLEC1/RAN/OS9/MDFIC/ATP2A2/FLNA/TOMM7
GO:0043588	skin development	37/1382	412/17913	0.187621	0.413174	37	COL1A1/COL1A2/COL3A1/IGFBP5/FOXC1/COL5A2/FGF7/ERRFI1/PALLD/COL5A1/CTSK/CTSL/YAP1/SOX9/COL5A3/PDGFA/ADAMTS2/INTU/EGFR/FST/JAG1/COMP/CLIC4/SAV1/PKD1/SNAI1/CD109/ZFP36L1/ROCK2/AKR1C3/FLNB/CTNNB1/KRT10/GNAS/INHBA/TXNIP/ZFP36
GO:0072507	divalent inorganic cation homeostasis	37/1382	412/17913	0.187621	0.413174	37	APOE/CXCL12/LRP1/CAV1/THY1/PDGFRA/GJA1/PTH1R/SLC39A14/C1QTNF1/AGT/PLN/EDNRA/SYNPO/EGFR/ANK2/ANXA2/S1PR3/ITGAV/APP/PKD1/BNIP3/CAMK2D/YWHAE/CALR/FIS1/TMCO1/ABL2/SRI/CALM2/STOML2/TMEM165/ATP2A2/GSTO1/TGM2/HEXB/HSP90B1
GO:0030323	respiratory tube development	36/1382	173/17913	3.4305e-08	1.65768e-06	36	SPARC/IGFBP5/TNC/FGFR1/PDGFRB/EPAS1/ID1/PTN/FGF7/PDGFRA/HES1/ERRFI1/RCN3/RBP4/LOX/MMP14/NFIB/PDPN/YAP1/SOX9/PDGFA/ADAMTS2/EGFR/TULP3/TNS3/CRISPLD2/SAV1/PKD1/PCSK5/BMPR2/SPRY1/CTNNB1/PHF14/VEGFA/KLF2/EIF4EBP1
GO:0007565	female pregnancy	36/1382	193/17913	5.97802e-07	1.92022e-05	36	IGFBP5/IGFBP7/TIMP1/FBLN1/EMP2/MMP2/PTN/NR2F2/GJA1/PGF/AGT/COL16A1/PAPPA/SYDE1/PTGIS/MAGED2/CST3/PAM/COMT/PCSK5/SOD1/BMPR2/SPP1/CALR/RPL29/FOSB/ANGPT2/CTSB/CAPN2/FKBP4/IGFBP2/PRDX3/JUNB/C1QBP/TMED2/FOS
GO:0060560	developmental growth involved in morphogenesis	36/1382	214/17913	7.23216e-06	0.000154574	36	FN1/APOE/CXCL12/TNC/LRP1/MAP1B/NRP2/SFRP1/SLIT2/LAMB2/CTTN/SLIT3/CSF1/NDN/NRP1/YAP1/SOX9/TBX2/TMEM108/EFNA5/DCLK1/SIX1/TNFRSF12A/ITGB1/APP/LZTS2/BMPR2/HSP90AB1/SPP1/ILK/SPRY1/RYK/DPYSL2/CTNNB1/HSP90AA1/VEGFA
GO:0000302	response to reactive oxygen species	36/1382	230/17913	3.64314e-05	0.000576779	36	COL1A1/APOE/TPM1/CRYAB/APOD/CYP1B1/PDGFRB/MMP2/PDGFRA/AXL/EGFR/RHOB/CST3/PAWR/KLF4/BNIP3/PDGFD/SOD1/NET1/JUN/PPP2CB/BAD/AKR1C3/GSTP1/PARK7/PRDX2/SPHK1/CAPN2/EEF2/RACK1/STK25/PRDX3/RPS3/KLF2/TXNIP/FOS
GO:0044839	cell cycle G2/M phase transition	36/1382	257/17913	0.00035632	0.00389011	36	FHL1/CCND1/SMARCD3/PBX1/PSMB5/APP/DYNLL1/YWHAE/DYNC1I2/CDKN1A/NPM1/PHLDA1/PSMC3/PSMB6/PSMB1/TUBB/SKP1/PSMD8/DCTN2/OPTN/CALM2/TUBA1A/NOP53/HSP90AA1/PSMD2/PSMA3/TUBB4B/PSMC5/PSMD3/PSMB7/PSMC1/PSMA2/AKAP9/PSMA1/PSMC4/PSME2
GO:0007162	negative regulation of cell adhesion	36/1382	271/17913	0.000965091	0.00863609	36	COL1A1/CXCL12/LGALS1/FBLN1/SERPINE2/TNC/APOD/LRP1/CYP1B1/MDK/C1QTNF1/MMP14/ANGPT1/DLC1/SNAI2/PRKG1/PDE5A/ZNF703/EFNA5/GPNMB/JAG1/CD9/TGFBI/TWSG1/SDC4/PTK2/PAWR/THBS1/KLF4/PHLDB2/RDX/LGALS3/PRDX2/ANGPT2/SMAD7/ATP5F1B
GO:0009260	ribonucleotide biosynthetic process	36/1382	279/17913	0.00162317	0.0129783	36	NUPR1/PDK4/AK1/NME3/ADCY3/ZBTB20/GUCY1A1/NME4/PAPSS2/IGF1/ATP5MC3/PAPSS1/ATP5PF/LDHA/ADK/TPI1/STOML2/ATP5MC1/NME1/EIF6/PKM/ATP5F1C/CMPK1/MPC1/IMPDH2/UQCC3/PFKP/PGAM1/ATP5PO/ATP5F1D/ATP5F1B/ATP5MF/ATP5ME/DDIT4/ENO1/APRT
GO:0046390	ribose phosphate biosynthetic process	36/1382	284/17913	0.00220862	0.0166541	36	NUPR1/PDK4/AK1/NME3/ADCY3/ZBTB20/GUCY1A1/NME4/PAPSS2/IGF1/ATP5MC3/PAPSS1/ATP5PF/LDHA/ADK/TPI1/STOML2/ATP5MC1/NME1/EIF6/PKM/ATP5F1C/CMPK1/MPC1/IMPDH2/UQCC3/PFKP/PGAM1/ATP5PO/ATP5F1D/ATP5F1B/ATP5MF/ATP5ME/DDIT4/ENO1/APRT
GO:0009895	negative regulation of catabolic process	36/1382	288/17913	0.00280046	0.0202106	36	TIMP1/SERPINE2/LEPR/TIMP3/NUPR1/EGFR/MAP1A/CST3/FEZ1/ANXA2/PTK2/LAPTM4B/YBX3/HSP90AB1/RPL5/RRAGA/MTMR2/PARK7/ATRAID/DAP/CIRBP/ERLEC1/CAMLG/PHB/RPL11/OS9/YBX1/NOP53/SNRNP70/TOB1/FLNA/HNRNPA0/RNF5/UBXN1/ZFP36/DDIT4
GO:0072522	purine-containing compound biosynthetic process	36/1382	291/17913	0.00332935	0.0232576	36	NUPR1/PDK4/NT5E/AK1/NME3/ADCY3/ZBTB20/GUCY1A1/NME4/PAPSS2/IGF1/ATP5MC3/PAPSS1/ATP5PF/LDHA/ADK/TPI1/STOML2/ATP5MC1/NME1/EIF6/PKM/ATP5F1C/MPC1/IMPDH2/UQCC3/PFKP/PGAM1/ATP5PO/ATP5F1D/ATP5F1B/ATP5MF/ATP5ME/DDIT4/ENO1/APRT
GO:0051169	nuclear transport	36/1382	305/17913	0.00706828	0.041433	36	LMNA/APOD/GAS6/AGT/ANGPT1/PTPN14/TCF7L2/BAG3/LZTS2/PKIG/PKD1/YWHAE/PTTG1IP/CDKN1A/PARK7/NPM1/IFI27/CALR/BANF1/AHCYL1/RAN/SSB/PHAX/MBTPS1/MDFIC/EIF5A/PHB2/SNRPE/CBLB/FLNA/HNRNPA1/TXNIP/SNRPD1/SNRPF/SNRPD2/SRSF7
GO:0045089	positive regulation of innate immune response	36/1382	373/17913	0.0964884	0.264031	36	CAV1/S100A1/CTSK/CTSL/COLEC12/CADM1/HSPA1B/PSMB5/NECTIN2/HSPA1A/PSMC3/PSMB6/PSMB1/CTSB/SKP1/IFI16/PSMD8/HEXIM1/RPS27A/UBB/HSPD1/NOP53/RPS19/C1QBP/PSMD2/RFTN1/PSMA3/PSMC5/PSMD3/PSMB7/PSMC1/PSMA2/PSMA1/HSP90B1/PSMC4/PSME2
GO:0072503	cellular divalent inorganic cation homeostasis	36/1382	392/17913	0.157008	0.371969	36	APOE/CXCL12/LRP1/CAV1/THY1/PDGFRA/GJA1/PTH1R/SLC39A14/C1QTNF1/AGT/PLN/EDNRA/SYNPO/ANK2/ANXA2/S1PR3/ITGAV/APP/PKD1/BNIP3/CAMK2D/YWHAE/CALR/FIS1/TMCO1/ABL2/SRI/CALM2/STOML2/TMEM165/ATP2A2/GSTO1/TGM2/HEXB/HSP90B1
GO:0051052	regulation of DNA metabolic process	36/1382	403/17913	0.200294	0.429909	36	ID3/FGFR1/PDGFRB/GJA1/SMOC2/TWIST1/EGFR/CST3/KLF4/JUN/BMPR2/HSP90AB1/NUCKS1/ZBTB38/MYC/MGMT/MAGEF1/CDKN1A/NPM1/CTNNB1/CCT3/PTGES3/CCT7/STOML2/HSP90AA1/ERCC1/MPHOSPH8/CCT4/TCP1/RPS3/CCT6A/HNRNPA1/CCT2/CCT8/FUS/CCT5
GO:0051656	establishment of organelle localization	36/1382	448/17913	0.424174	0.672891	36	S100A13/MAP1B/GEM/PFN2/FEZ1/PTK2/BACE1/STXBP1/MYO1C/ARHGAP21/BOD1/WASL/CD59/MYH10/NECTIN2/MAP4/SPRY1/SUN1/MCFD2/CHMP5/KIFAP3/CTNNB1/KIF1C/TMEM230/LMAN1/TFG/SEC31A/RAN/TMED9/TMED10/STK25/DCTN2/USO1/UBB/ATP2A2/TMED2
GO:0034765	regulation of ion transmembrane transport	36/1382	453/17913	0.4515	0.699661	36	CAV1/THY1/FXYD1/GJA1/S100A1/FHL1/GEM/AGT/TWIST1/PLN/KCNMA1/ANK2/CD63/CLIC4/APP/THBS1/AHNAK/CCL2/RRAD/CAMK2D/YWHAE/SESTD1/YWHAQ/PARK7/MEF2C/TMEM109/AHCYL1/CHCHD10/SRI/ARL6IP5/CALM2/PHB2/ISCU/GSTO1/FLNA/AKAP9
GO:0072006	nephron development	35/1382	142/17913	4.77348e-10	3.53683e-08	35	ACTA2/FOXC1/PDGFRB/PDGFRA/HES1/NOTCH3/PGF/SULF1/FOXC2/AGT/LAMB2/WWTR1/ANGPT1/IRX3/ENPEP/YAP1/SOX9/FOXD1/NPNT/SIX1/JAG1/NID1/EGR1/PBX1/LZTS2/AHI1/PKD1/PDGFD/MAGED1/ILK/MYC/MEF2C/CTNNB1/ANGPT2/VEGFA
GO:0048762	mesenchymal cell differentiation	35/1382	199/17913	3.47479e-06	8.54398e-05	35	COL1A1/FN1/FOXC1/FRZB/FGFR1/MDK/HES1/VASN/NRP2/SFRP1/FOXC2/BMP5/TGFB1I1/PDPN/WWTR1/TWIST1/NRP1/SNAI2/SOX9/KITLG/EDNRA/BAMBI/EPHA3/HEY2/ZNF703/JAG1/PHLDB1/DAB2/ENG/SNAI1/PHLDB2/SPRY1/MEF2C/CTNNB1/SMAD7
GO:0050679	positive regulation of epithelial cell proliferation	35/1382	199/17913	3.47479e-06	8.54398e-05	35	CXCL12/HTRA1/FGFR1/ID1/PTN/FGF7/MDK/DLX5/CCND1/NRP2/SFRP1/CAV2/BMP5/TWIST1/NRP1/SOX9/LAMC1/LAMB1/EGFR/ZNF703/DLX6/TCF7L2/ANG/JUN/TNFSF12/BMPR2/BAD/IGF1/AKT3/MYC/MYDGF/CTNNB1/NR4A1/NME1/VEGFA
GO:0010594	regulation of endothelial cell migration	35/1382	231/17913	9.13133e-05	0.00126773	35	DCN/APOE/SPARC/SERPINF1/FGFR1/EMP2/PTN/PLPP3/NR2F2/NRP2/FOXC2/SMOC2/SLIT2/AGT/ANGPT1/NRP1/SASH1/ADGRA2/RHOB/SPRED1/HSPB1/AMOTL1/PTK2/ADAMTS9/THBS1/KLF4/ROCK2/BMPR2/AKT3/MEF2C/CALR/ANGPT2/AAMP/VEGFA/ATP5F1B
GO:0000086	G2/M transition of mitotic cell cycle	35/1382	238/17913	0.000166677	0.00215401	35	FHL1/CCND1/SMARCD3/PBX1/PSMB5/APP/DYNLL1/YWHAE/DYNC1I2/CDKN1A/PHLDA1/PSMC3/PSMB6/PSMB1/TUBB/SKP1/PSMD8/DCTN2/OPTN/CALM2/TUBA1A/NOP53/HSP90AA1/PSMD2/PSMA3/TUBB4B/PSMC5/PSMD3/PSMB7/PSMC1/PSMA2/AKAP9/PSMA1/PSMC4/PSME2
GO:0042180	cellular ketone metabolic process	35/1382	241/17913	0.000213394	0.00263518	35	CAV1/BMP5/TWIST1/PDK4/DKK3/AKR1C1/AKR1C2/EGR1/PSMB5/NFE2L1/COMT/KDSR/ACADVL/AKR1C3/PARK7/PNKD/PSMC3/PSMB6/PSMB1/INSIG2/GLO1/TPI1/PSMD8/EIF6/PSMD2/PSMA3/AKR1A1/PSMC5/PSMD3/PSMB7/PSMC1/PSMA2/PSMA1/PSMC4/PSME2
GO:0090596	sensory organ morphogenesis	35/1382	250/17913	0.000431673	0.00453255	35	FRZB/COL5A2/FGFR1/COL11A1/FBN1/PTN/THY1/PRRX1/NTRK2/DLX5/COL5A1/COL8A1/EFEMP1/RBP4/TWIST1/SOX9/TBX2/ALDH1A3/FAT1/DLX6/SIX1/JAG1/MAFB/ABI2/C12orf57/AHI1/SOD1/CTHRC1/ITGA8/CTNNB1/COL2A1/ZEB1/INSIG2/PRKRA/VEGFA
GO:0009152	purine ribonucleotide biosynthetic process	35/1382	266/17913	0.00133271	0.0112381	35	NUPR1/PDK4/AK1/NME3/ADCY3/ZBTB20/GUCY1A1/NME4/PAPSS2/IGF1/ATP5MC3/PAPSS1/ATP5PF/LDHA/ADK/TPI1/STOML2/ATP5MC1/NME1/EIF6/PKM/ATP5F1C/MPC1/IMPDH2/UQCC3/PFKP/PGAM1/ATP5PO/ATP5F1D/ATP5F1B/ATP5MF/ATP5ME/DDIT4/ENO1/APRT
GO:0070372	regulation of ERK1 and ERK2 cascade	35/1382	271/17913	0.0018393	0.014416	35	FN1/APOE/PLA2G2A/FBLN1/LRP1/TIMP3/PDGFRB/GAS6/CAVIN3/PDGFRA/EMILIN1/ERRFI1/ACKR3/RRAS/NDRG2/ANGPT1/NRP1/PDGFA/CAMK2N1/FGFR3/EGFR/NPNT/GPNMB/AKAP12/SPRED1/APP/KLF4/JUN/ATF3/SPRY1/GSTP1/MIF/SHC1/PHB/PHB2
GO:0051348	negative regulation of transferase activity	35/1382	272/17913	0.00195854	0.0151794	35	APOE/CAV1/THY1/CDKN1C/NR2F2/ERRFI1/RGS3/SFRP1/WWTR1/CAMK2N1/GPRC5A/SPRED1/HSPB1/SOCS3/GADD45B/ILK/PHPT1/DUSP14/ADARB1/RPL5/CDKN1A/GSTP1/PARK7/NPM1/RACK1/EIF4A2/COX11/SMAD7/RPL11/PRDX3/HEXIM1/RTRAF/DNAJA1/GADD45A/ZFP36
GO:0006164	purine nucleotide biosynthetic process	35/1382	280/17913	0.00317743	0.022266	35	NUPR1/PDK4/AK1/NME3/ADCY3/ZBTB20/GUCY1A1/NME4/PAPSS2/IGF1/ATP5MC3/PAPSS1/ATP5PF/LDHA/ADK/TPI1/STOML2/ATP5MC1/NME1/EIF6/PKM/ATP5F1C/MPC1/IMPDH2/UQCC3/PFKP/PGAM1/ATP5PO/ATP5F1D/ATP5F1B/ATP5MF/ATP5ME/DDIT4/ENO1/APRT
GO:0051235	maintenance of location	35/1382	286/17913	0.00447304	0.0288695	35	APOE/FBN1/CAV1/THY1/NBL1/LPL/ENPP1/LTBP1/MDFI/PLN/SCIN/ANK2/HILPDA/ITGAV/PKD1/ARHGAP21/GSN/CAMK2D/ARL2/SUN1/PARK7/FLNB/CALR/SKP1/OS9/ALKBH7/SRI/CALM2/GSTO1/FLNA/HEXB/AKAP9/HSPA5/HSP90B1/PLIN2
GO:0051961	negative regulation of nervous system development	35/1382	290/17913	0.00556544	0.0342493	35	COL3A1/APOE/LGALS1/LRP1/ID4/ID1/PTN/THY1/HES1/PMP22/NOTCH3/TMEM98/SLIT2/IRX3/DPYSL3/NRP1/SOX9/NGFR/DAAM2/PTPRG/DIXDC1/JAG1/PTK2/PBX1/TULP3/VIM/APP/SPP1/CTNNA1/RYK/MTMR2/CALR/CTNNB1/FKBP4/ITM2C
GO:0006913	nucleocytoplasmic transport	35/1382	302/17913	0.0102688	0.0548162	35	LMNA/APOD/GAS6/AGT/ANGPT1/PTPN14/TCF7L2/BAG3/LZTS2/PKIG/PKD1/YWHAE/PTTG1IP/CDKN1A/PARK7/NPM1/IFI27/CALR/AHCYL1/RAN/SSB/PHAX/MBTPS1/MDFIC/EIF5A/PHB2/SNRPE/CBLB/FLNA/HNRNPA1/TXNIP/SNRPD1/SNRPF/SNRPD2/SRSF7
GO:0032103	positive regulation of response to external stimulus	35/1382	315/17913	0.0186361	0.0850253	35	CXCL12/PLA2G2A/LRP1/RARRES2/FGFR1/PDGFRB/NUPR1/GAS6/PTN/MDK/LPL/SMOC2/SLIT2/AGT/CSF1/NRP1/SASH1/OSMR/EGFR/HSPB1/CD81/IL6ST/APP/THBS1/PDGFD/BMPR2/TNFRSF1A/MIF/PARK7/CALR/OPTN/RPS19/TGM2/C1QBP/VEGFA
GO:0072330	monocarboxylic acid biosynthetic process	35/1382	318/17913	0.021186	0.0937682	35	DCN/BGN/PTGDS/NUPR1/LPL/PDK4/ALDH1A3/RBP1/CSPG4/DSEL/PTGIS/VCAN/FADS3/SLC1A3/ZBTB20/HACD3/MGLL/ACADVL/IGF1/GPX4/AKR1C3/CBR1/MIF/PARK7/LDHA/INSIG2/TPI1/PTGES3/NDUFAB1/EIF6/PKM/PFKP/PGAM1/DDIT4/ENO1
GO:0008202	steroid metabolic process	35/1382	321/17913	0.0240048	0.101913	35	APOE/IGFBP7/LEPR/CYP1B1/FGFR1/PDGFRA/BMP5/AGT/DKK3/SNAI2/AKR1C1/AKR1C2/LIMA1/EGR1/PBX1/APP/CYB5R3/NFE2L1/COMT/SNAI1/SOD1/SPP1/ACADVL/HDLBP/AKR1C3/CES1/INSIG2/ACAA2/RAN/EBPL/MBTPS1/STUB1/ATP1A1/CNBP/FDPS
GO:0071902	positive regulation of protein serine/threonine kinase activity	35/1382	322/17913	0.0250073	0.104564	35	FGFR1/PDGFRB/CCND1/FZD8/KITLG/SASH1/MAPK10/GHR/PDGFA/EGFR/PDE5A/CSPG4/ITGA1/CD81/THBS1/GADD45B/PKD1/MAGED1/SOD1/HACD3/HSP90AB1/ILK/MAP3K20/IGF1/MIF/PRDX2/SHC1/PEA15/MDFIC/CALM2/RPS27A/UBB/VEGFA/RPS3/GADD45A
GO:0010948	negative regulation of cell cycle process	35/1382	344/17913	0.0564279	0.184561	35	FHL1/CCND1/GPNMB/KANK2/SOX4/PSMB5/KLF4/CCL2/ZFP36L1/HSP90AB1/CDKN1A/MIF/NPM1/CALR/PRMT1/PSMC3/PSMB6/RPS27L/PSMB1/SKP1/PSMD8/PSMG2/NOP53/RPL26/PSMD2/PSMA3/PSMC5/PSMD3/PSMB7/PSMC1/PSMA2/PSMA1/GADD45A/PSMC4/PSME2
GO:0042391	regulation of membrane potential	35/1382	374/17913	0.135373	0.337491	35	DCN/CAV1/PTN/FXYD1/GJA1/NTRK2/FHL1/PLN/TMEM108/KCNMA1/ANK2/APP/BNIP3/SOD1/JUN/CAMK2D/YWHAE/BAD/MTMR2/PARK7/MEF2C/CHCHD10/RACK1/SMAD7/SRI/ARL6IP5/STOML2/PRDX3/UBB/ATP2A2/ATP1A1/FLNA/IFI6/PRELID1/AKAP9
GO:0006874	cellular calcium ion homeostasis	35/1382	375/17913	0.138809	0.340408	35	APOE/CXCL12/LRP1/CAV1/THY1/PDGFRA/GJA1/PTH1R/C1QTNF1/AGT/PLN/EDNRA/SYNPO/ANK2/ANXA2/S1PR3/ITGAV/APP/PKD1/BNIP3/CAMK2D/YWHAE/CALR/FIS1/TMCO1/ABL2/SRI/CALM2/STOML2/TMEM165/ATP2A2/GSTO1/TGM2/HEXB/HSP90B1
GO:0055074	calcium ion homeostasis	35/1382	388/17913	0.188166	0.413786	35	APOE/CXCL12/LRP1/CAV1/THY1/PDGFRA/GJA1/PTH1R/C1QTNF1/AGT/PLN/EDNRA/SYNPO/ANK2/ANXA2/S1PR3/ITGAV/APP/PKD1/BNIP3/CAMK2D/YWHAE/CALR/FIS1/TMCO1/ABL2/SRI/CALM2/STOML2/TMEM165/ATP2A2/GSTO1/TGM2/HEXB/HSP90B1
GO:0006816	calcium ion transport	35/1382	415/17913	0.315034	0.560028	35	CXCL12/PDGFRB/GAS6/CAV1/THY1/GJA1/S100A1/GEM/AGT/PLN/RAMP1/ANK2/MYLK/ANXA2/ITGAV/AHNAK/ANXA5/PKD1/CCL2/RRAD/CAMK2D/YWHAE/SESTD1/LGALS3/CTNNB1/PHB/TMCO1/VDAC1/SRI/CALM2/STOML2/TMEM165/PHB2/ATP2A2/GSTO1
GO:0008544	epidermis development	35/1382	452/17913	0.516952	0.763205	35	IGFBP5/SFRP4/FOXC1/FGFR1/EMP1/FGF7/HES1/ERRFI1/PALLD/CTSK/CTSL/YAP1/SOX9/PDGFA/INTU/HEY2/EGFR/FST/JAG1/CLIC4/SAV1/KLF4/SNAI1/CD109/SOD1/ZFP36L1/ROCK2/AKR1C3/FLNB/CTNNB1/KRT10/ATP2A2/INHBA/TXNIP/ZFP36
GO:0000226	microtubule cytoskeleton organization	35/1382	460/17913	0.560395	0.78947	35	CRYAB/LMNA/MAP1B/TPPP3/EPHA3/CEP126/EFNA5/DIXDC1/CAMSAP2/MAP1A/PHLDB1/PTK2/HSPA1B/MAP7D3/LZTS2/PKD1/PHLDB2/ROCK2/MAP4/SPRY1/ARL2/SBDS/SUN1/NPM1/HSPA1A/CHMP5/CTNNB1/TUBB/RAN/FKBP4/FLNA/RPS3/AKAP9/GADD45A/NTMT1
GO:0022904	respiratory electron transport chain	34/1382	106/17913	2.69586e-13	3.40475e-11	34	NDUFS4/PARK7/NDUFC2/NDUFB4/COX6C/DNAJC15/NDUFAF2/NDUFB7/ETFB/NDUFC1/NDUFB2/NDUFA8/NDUFA5/NDUFS5/NDUFA4/NDUFAB1/NDUFA12/NDUFB10/ISCU/NDUFA13/NDUFB5/UQCRQ/NDUFV2/NDUFB6/COX6A1/UQCC3/CYC1/NDUFB8/NDUFA6/NDUFA11/NDUFB3/COX7C/UQCRH/UQCRB
GO:0034332	adherens junction organization	34/1382	134/17913	3.67282e-10	2.87463e-08	34	APOD/LRP1/CDH11/THY1/FERMT2/SFRP1/MMP14/CTTN/LIMCH1/DLC1/NRP1/COL16A1/TRIP6/EPHA3/ZNF703/EFNA5/RASSF8/CADM1/SDC4/PTK2/ANG/THBS1/GPM6B/S100A10/AFDN/PHLDB2/NECTIN2/ROCK2/CTNNA1/CTNND1/RDX/CTNNB1/SMAD7/VEGFA
GO:2001236	regulation of extrinsic apoptotic signaling pathway	34/1382	151/17913	1.03012e-08	5.66772e-07	34	LMNA/TIMP3/FGFR1/CAV1/SFRP1/BMP5/AGT/CTTN/UNC5B/NRP1/SNAI2/YAP1/SRPX/TCF7L2/LTBR/HSPA1B/TNFRSF12A/ITGAV/THBS1/ATF3/TNFSF12/CTNNA1/IGF1/GSTP1/LGALS3/PARK7/HSPA1A/PRDX2/COL2A1/PDIA3/PEA15/ITM2C/INHBA/IFI6
GO:0006986	response to unfolded protein	34/1382	161/17913	5.59969e-08	2.45019e-06	34	LMNA/SERPINH1/CCND1/HSPB2/HSPB1/COMP/BAG3/KDELR3/THBS1/CCL2/ATF3/HSP90AB1/ACADVL/DNAJB4/MYDGF/YIF1A/HSPA1A/SHC1/CALR/SEC31A/PDIA6/RACK1/HSPE1/MBTPS1/OPTN/HSPD1/MANF/HSP90AA1/STUB1/HSPA8/DNAJA1/HSPA5/PPP1R15A/HSP90B1
GO:0030324	lung development	34/1382	169/17913	1.92451e-07	7.27516e-06	34	SPARC/IGFBP5/TNC/FGFR1/PDGFRB/EPAS1/ID1/PTN/FGF7/PDGFRA/HES1/ERRFI1/RCN3/RBP4/LOX/MMP14/NFIB/PDPN/YAP1/SOX9/PDGFA/ADAMTS2/EGFR/TNS3/CRISPLD2/SAV1/PKD1/BMPR2/SPRY1/CTNNB1/PHF14/VEGFA/KLF2/EIF4EBP1
GO:0061013	regulation of mRNA catabolic process	34/1382	178/17913	6.89664e-07	2.14104e-05	34	HSPB1/PSMB5/VIM/YBX3/ZFP36L1/ROCK2/NPM1/HSPA1A/PSMC3/PSMB6/CIRBP/PSMB1/PSMD8/YBX1/RPS27A/UBB/TOB1/PSMD2/HSPA8/HNRNPA0/PSMA3/PSMC5/PSMD3/PSMB7/PSMC1/PSMA2/HNRNPR/PSMA1/SERBP1/CARHSP1/SET/PSMC4/ZFP36/PSME2
GO:2001235	positive regulation of apoptotic signaling pathway	34/1382	178/17913	6.89664e-07	2.14104e-05	34	TIMP3/NUPR1/CAV1/SFRP1/AGT/SRPX/LTBR/TNFRSF12A/THBS1/BNIP3/MAGED1/SOD1/GSN/ATF3/TNFSF12/YWHAE/CTNNA1/BAD/YWHAQ/PDCD5/PARK7/FAM162A/FIS1/CHCHD10/RACK1/PDIA3/RPL11/PEA15/ITM2C/PRKRA/UBB/RPL26/INHBA/RPS3
GO:1902905	positive regulation of supramolecular fiber organization	34/1382	185/17913	1.72803e-06	4.7538e-05	34	CLU/APOE/DSTN/TPM1/MAP1B/ID1/RHOC/SFRP1/CTTN/LIMCH1/CDC42EP5/NRP1/NCKAP1/PFN2/LMOD1/SCIN/KIRREL1/SORBS3/ABI2/SDC4/HSPA1B/APP/MYO1C/S100A10/WASL/GSN/ROCK2/CFL2/ARL2/HSPA1A/SNX9/FLNA/RPS3/AKAP9
GO:0043624	cellular protein complex disassembly	34/1382	195/17913	5.80078e-06	0.000130506	34	DSTN/MAP1B/EPS8/PLEKHH2/LMOD1/SCIN/LIMA1/ASPH/GSN/CFL2/RDX/GADD45GIP1/MRPL32/MRPS26/MRPL18/MRPL34/MRPL43/MRPL27/MRPL40/MRPS21/MRPL17/EIF5A/MRPL36/TRMT112/MRPL33/MRPL41/HSPA8/MRPS36/MRPL20/MRPL14/MRPS6/MRPS15/MRPL11/MRPL3
GO:0019882	antigen processing and presentation	34/1382	220/17913	7.67882e-05	0.0010938	34	RAB34/ITGB5/CTSL/CTSF/PSMB5/ITGAV/THBS1/DYNLL1/DYNC1I2/KIFAP3/CALR/PSMC3/PSMB6/SEC31A/PSMB1/DYNC1LI2/PDIA3/CLTA/PSMD8/DCTN2/AP1S1/PSMD2/AP2M1/DCTN6/RFTN1/PSMA3/PSMC5/PSMD3/PSMB7/PSMC1/PSMA2/PSMA1/PSMC4/PSME2
GO:0006839	mitochondrial transport	34/1382	224/17913	0.0001103	0.00149133	34	BAG3/LEPROT/BNIP3/TMEM14C/YWHAE/BAD/YWHAQ/PDCD5/HSPA1A/ATP5MC3/LMAN1/MRPL18/FIS1/ATP5PF/CHCHD10/ACAA2/ALKBH7/DNAJC19/STOML2/SLC25A6/ATP5MC1/NDUFA13/ATP5F1C/HSP90AA1/TIMM8B/TOMM20/TIMM13/ATP5PO/ATP5F1D/ATP5F1B/ATP5MF/ATP5ME/TOMM7/SLC25A5
GO:0043903	regulation of symbiosis, encompassing mutualism through parasitism	34/1382	232/17913	0.000219262	0.00268378	34	APOE/IFITM3/LGALS1/CAV1/CAV2/ANXA2/ITGAV/GSN/JUN/NECTIN2/HACD3/NUCKS1/PPIB/BAD/ADARB1/POLR2F/IFI27/BANF1/TRIM8/PSMC3/POLR2H/IFI16/POLR2E/MDFIC/POLR2I/SQSTM1/IFITM1/MPHOSPH8/PPIA/HSPA8/P4HB/POLR2L/POLR2K/ZFP36
GO:0071383	cellular response to steroid hormone stimulus	34/1382	243/17913	0.000523054	0.00519966	34	SERPINF1/PMEPA1/TFPI/NR2F2/ERRFI1/SFRP1/TGFB1I1/RBFOX2/YAP1/EGFR/KLF9/KANK2/DAB2/PLPP1/THRA/FHL2/FBXO32/ZFP36L1/AKR1C3/GSTP1/PARK7/CALR/CTNNB1/RWDD1/PHB/RAN/NR4A1/FKBP4/PHB2/ATP1A1/LBH/ZFP36/DDIT4/EIF4EBP1
GO:0021537	telencephalon development	34/1382	246/17913	0.000653723	0.00632881	34	COL3A1/CXCL12/LRP1/ID4/CRTAC1/MDK/HES1/NTRK2/DLX5/NRP2/SLIT2/NFIB/GNG12/NRP1/ALDH1A3/TMEM108/LAMB1/EGFR/DIXDC1/FEZ1/C12orf57/BNIP3/MYH10/YWHAE/BAD/DPCD/RYK/SUN1/CTNNB1/RAN/NME1/UQCRQ/INHBA/FLNA
GO:0051146	striated muscle cell differentiation	34/1382	263/17913	0.00208444	0.0158788	34	IGFBP5/TPM1/LMNA/PDGFRB/PDGFRA/SGCB/SORBS2/CAV2/LOX/MMP14/AGT/TMEM119/EHD2/HEY2/SHOX2/CD9/CD81/COMP/CBY1/ITGB1/MYOF/PDLIM5/MYH11/MYH10/CFL2/IGF1/MORF4L2/MEF2C/CALR/CAPN2/MEF2A/YBX1/VEGFA/ACTG1
GO:0010976	positive regulation of neuron projection development	34/1382	265/17913	0.0023632	0.0175738	34	FN1/APOE/CXCL12/SERPINF1/LRP1/FGFR1/MAP1B/PTN/MDK/NTRK2/BMP5/SLIT2/AGT/DPYSL3/NRP1/NGFR/PTPRD/EPHA3/NDNF/EFNA5/SHOX2/FEZ1/TNFRSF12A/PLXNB2/SCARB2/BMPR2/ILK/METRN/TMEM106B/STK25/ABL2/NME1/VEGFA/HSPA5
GO:1990778	protein localization to cell periphery	34/1382	276/17913	0.004539	0.0291935	34	LRP1/EMP2/GAS6/CAV1/EPB41L2/RAB34/MMP14/EHD2/MAPK10/EPHA3/RAMP1/EGFR/ANK2/DAB2/CD81/ITGB1/STXBP1/ARL3/S100A10/AFDN/RAB13/ROCK2/TNFRSF1A/RDX/LGALS3/TMEM59/CLSTN1/RER1/RACK1/OPTN/SQSTM1/TMED2/FLNA/AP2M1
GO:0003015	heart process	34/1382	284/17913	0.00702604	0.0412288	34	TPM1/EPAS1/CAV1/FXYD1/GJA1/S100A1/AGT/WWTR1/PLN/YAP1/TBX2/HEY2/PDE5A/ANK2/ASPH/FXYD6/THRA/VEGFB/SMAD5/SOD1/CAMK2D/YWHAE/AHCYL1/ATP5PF/MEF2A/SMAD7/SRI/CALM2/ATP2A2/GSTO1/ATP1A1/FLNA/AKAP9/GLRX3
GO:0006898	receptor-mediated endocytosis	34/1382	301/17913	0.016155	0.0756305	34	CLU/APOE/SPARC/SFRP4/LRP1/CAV1/ACKR3/TF/CAV2/COLEC12/CTTN/ANGPT1/HSPG2/TMEM108/RAMP1/PLA2R1/CD9/DAB2/ANXA2/CD81/CD63/ITGB1/AHI1/SCARB2/WASL/MTMR2/CALR/LRPAP1/SNX9/AP1S1/HSP90AA1/VEGFA/AP2M1/HSP90B1
GO:0048193	Golgi vesicle transport	34/1382	304/17913	0.0184783	0.0843745	34	BGLAP/GAS6/RAB34/COPZ2/MYO1B/GAS1/ANK2/KDELR3/ARL3/ARL1/DYNLL1/CD59/DYNC1I2/KDELR2/KDELR1/MCFD2/KIFAP3/KIF1C/LMAN1/TFG/SEC31A/RER1/DYNC1LI2/RACK1/TMED9/TMED10/DCTN2/OPTN/SCYL1/USO1/ARF4/TMED2/DCTN6/SURF4
GO:0000377	RNA splicing, via transesterification reactions with bulged adenosine as nucleophile	34/1382	344/17913	0.0813232	0.236852	34	RBFOX2/POLR2F/PRDX6/NSRP1/POLR2H/POLR2E/YBX1/SNRPN/POLR2I/SAP18/DDX1/SNRNP70/SNRPE/C1QBP/HSPA8/HNRNPA0/SF3B6/POLR2L/HNRNPA1/ZCRB1/HNRNPR/SNRPD1/POLR2K/LSM2/LSM3/SNRPF/SRRM2/SNRPD2/HTATSF1/LSM5/FUS/SRSF7/SNU13/TXNL4A
GO:0000398	mRNA splicing, via spliceosome	34/1382	344/17913	0.0813232	0.236852	34	RBFOX2/POLR2F/PRDX6/NSRP1/POLR2H/POLR2E/YBX1/SNRPN/POLR2I/SAP18/DDX1/SNRNP70/SNRPE/C1QBP/HSPA8/HNRNPA0/SF3B6/POLR2L/HNRNPA1/ZCRB1/HNRNPR/SNRPD1/POLR2K/LSM2/LSM3/SNRPF/SRRM2/SNRPD2/HTATSF1/LSM5/FUS/SRSF7/SNU13/TXNL4A
GO:0000375	RNA splicing, via transesterification reactions	34/1382	348/17913	0.0916912	0.255787	34	RBFOX2/POLR2F/PRDX6/NSRP1/POLR2H/POLR2E/YBX1/SNRPN/POLR2I/SAP18/DDX1/SNRNP70/SNRPE/C1QBP/HSPA8/HNRNPA0/SF3B6/POLR2L/HNRNPA1/ZCRB1/HNRNPR/SNRPD1/POLR2K/LSM2/LSM3/SNRPF/SRRM2/SNRPD2/HTATSF1/LSM5/FUS/SRSF7/SNU13/TXNL4A
GO:0010639	negative regulation of organelle organization	34/1382	352/17913	0.102913	0.277161	34	CLU/LMNA/MAP1B/NUPR1/EPS8/PLEKHH2/SLIT2/TWIST1/DLC1/PFN2/LMOD1/SCIN/LIMA1/FEZ1/BAG3/BNIP3/GSN/PHLDB2/MAP4/IGF1/RDX/NPM1/NBDY/HSPA1A/LMAN1/ACAA2/FKBP4/PSMG2/ODF2L/ERCC1/PRELID1/HNRNPA1/SET/SLC25A5
GO:0010876	lipid localization	34/1382	366/17913	0.14902	0.360516	34	CLU/APOE/PLA2G2A/SELENOM/APOD/LRP1/CAV1/LPL/ENPP1/C1QTNF1/RBP4/AGT/AKR1C1/PLA2R1/LIMA1/ANXA2/HILPDA/PLTP/ITGAV/THBS1/SCARB2/SPP1/NME4/HDLBP/MIF/ATP5PF/CES1/ALKBH7/STOML2/INHBA/HEXB/PRELID1/APOL6/PLIN2
GO:0031214	biomineral tissue development	33/1382	154/17913	6.05063e-08	2.62683e-06	33	COL1A1/COL1A2/MGP/IBSP/BGLAP/GAS6/PTN/GJA1/DDR2/ASPN/PTH1R/ENPP1/OMD/FAM20C/LOX/TWIST1/TMEM119/SOX9/FGFR3/HEY2/GPNMB/COMP/ALPL/GPM6B/ROCK2/BMPR2/SPP1/ANKH/IGF1/SBDS/MEF2C/ATRAID/KLF10
GO:0090288	negative regulation of cellular response to growth factor stimulus	33/1382	156/17913	8.38031e-08	3.42801e-06	33	DCN/HTRA1/FBN1/CAV1/PMEPA1/NBL1/EMILIN1/ASPN/LTBP1/VASN/SFRP1/SULF1/CAV2/TGFB1I1/SLIT2/AGT/ADGRA2/CHRDL1/BAMBI/GPC1/TWSG1/THBS1/EPN2/CD109/SPRY1/HSPA1A/SMAD7/RPS27A/UBB/TOB1/STUB1/FAM89B/HSPA5
GO:0043488	regulation of mRNA stability	33/1382	158/17913	1.15282e-07	4.60881e-06	33	HSPB1/PSMB5/VIM/YBX3/ZFP36L1/ROCK2/NPM1/HSPA1A/PSMC3/PSMB6/CIRBP/PSMB1/PSMD8/YBX1/RPS27A/UBB/PSMD2/HSPA8/HNRNPA0/PSMA3/PSMC5/PSMD3/PSMB7/PSMC1/PSMA2/HNRNPR/PSMA1/SERBP1/CARHSP1/SET/PSMC4/ZFP36/PSME2
GO:0043487	regulation of RNA stability	33/1382	163/17913	2.48674e-07	8.85821e-06	33	HSPB1/PSMB5/VIM/YBX3/ZFP36L1/ROCK2/NPM1/HSPA1A/PSMC3/PSMB6/CIRBP/PSMB1/PSMD8/YBX1/RPS27A/UBB/PSMD2/HSPA8/HNRNPA0/PSMA3/PSMC5/PSMD3/PSMB7/PSMC1/PSMA2/HNRNPR/PSMA1/SERBP1/CARHSP1/SET/PSMC4/ZFP36/PSME2
GO:0003205	cardiac chamber development	33/1382	170/17913	6.84193e-07	2.14104e-05	33	TPM1/CPE/FOXC1/COL11A1/HES1/ADAMTS1/LTBP1/NRP2/FOXC2/BMP5/RBP4/SLIT2/SLIT3/PARVA/NRP1/TBX2/HEY2/ANK2/SHOX2/JAG1/SMARCD3/SOX4/SAV1/ENG/PCSK5/MYH10/BMPR2/DHRS3/LMO4/MEF2C/TRIP11/PLXND1/SMAD7
GO:0048771	tissue remodeling	33/1382	170/17913	6.84193e-07	2.14104e-05	33	IGFBP5/BGN/TIMP1/LEPR/FOXC1/BGLAP/EPAS1/CAV1/PTN/MDK/GJA1/PTH1R/CTSK/SFRP1/FOXC2/AXL/MMP14/AGT/PDK4/TMEM119/TNFRSF11B/EGFR/P3H4/CSPG4/GPNMB/JAG1/CST3/CTHRC1/ROCK2/BMPR2/MEF2C/CTNNB1/TGM2
GO:0031099	regeneration	33/1382	194/17913	1.35152e-05	0.000260778	33	CXCL12/NNMT/TNC/APOD/LRP1/MAP1B/GAS6/PTN/THY1/MDK/PRRX1/GJA1/PGF/CCND1/AXL/LAMB2/YAP1/EGFR/JAM3/CD9/CD81/KLF4/GSN/JUN/CPQ/SPP1/CTNNA1/IGF1/CDKN1A/GSTP1/ANGPT2/PHB/PKM
GO:0002064	epithelial cell development	33/1382	199/17913	2.31873e-05	0.000402662	33	ACTA2/FGFR1/ID1/GJA1/PALLD/FRMD6/FOXC2/BMP5/LAMB2/TJP1/GSTM3/SOX9/FAT1/JAG1/CST3/ABI2/S1PR3/CLIC4/VIM/COL18A1/ENG/SOD1/AFDN/RAB13/ROCK2/TNFRSF1A/BAD/RDX/CDKN1A/FLNB/CTNNB1/RHEB/FLNA
GO:0007411	axon guidance	33/1382	210/17913	6.98455e-05	0.00100552	33	CXCL12/LRP1/ENAH/CHL1/DLX5/NCAM1/NRP2/SLIT2/NFIB/LAMB2/SLIT3/UNC5B/NRP1/FLRT2/NEO1/BOC/FOXD1/NTN4/EFNA5/GFRA1/GPC1/FEZ1/PTK2/APP/CHN1/APBB2/MYH10/BMPR2/RYK/DPYSL2/SHC1/RPL24/VEGFA
GO:0097485	neuron projection guidance	33/1382	212/17913	8.43551e-05	0.00118975	33	CXCL12/LRP1/ENAH/CHL1/DLX5/NCAM1/NRP2/SLIT2/NFIB/LAMB2/SLIT3/UNC5B/NRP1/FLRT2/NEO1/BOC/FOXD1/NTN4/EFNA5/GFRA1/GPC1/FEZ1/PTK2/APP/CHN1/APBB2/MYH10/BMPR2/RYK/DPYSL2/SHC1/RPL24/VEGFA
GO:0009266	response to temperature stimulus	33/1382	219/17913	0.000159042	0.00206206	33	CXCL12/IGFBP7/CRYAB/LPL/TGFB1I1/SCARA5/HSPA1B/BAG3/THBS1/MYOF/THRA/NFE2L1/SOD1/YBX3/CAMK2D/YWHAE/HSP90AB1/ACADVL/DNAJB4/IGF1/CDKN1A/HSPA1A/PTGES3/FKBP4/HSBP1/ATP2A2/HSPD1/HSP90AA1/STUB1/HSPA8/DNAJA1/FOS/EIF2B1
GO:0048738	cardiac muscle tissue development	33/1382	221/17913	0.000189248	0.00239011	33	TPM1/LMNA/FOXC1/FGFR1/PDGFRB/COL11A1/PDGFRA/GJA1/SGCB/FOXC2/SORBS2/BMP5/RBP4/AGT/PLN/YAP1/TBX2/HEY2/CBY1/ITGB1/ADAMTS9/SAV1/ENG/PDLIM5/MYH11/MYH10/IGF1/MEF2C/CALR/MEF2A/SMAD7/NDUFV2/VEGFA
GO:0009743	response to carbohydrate	33/1382	224/17913	0.000244219	0.0028571	33	SPARC/COL6A2/LGALS1/SERPINF1/LRP1/MAP1B/GAS6/GJA1/LPL/COLEC12/EFNA5/CST3/EGR1/SOX4/TCF7L2/THBS1/ZBTB20/ZFP36L1/PHPT1/BAD/GSTP1/HMGN3/FIS1/ANGPT2/NDUFAF2/RACK1/SRI/NME1/ERCC1/TXNIP/TXN2/JAGN1/EIF2B1
GO:0110053	regulation of actin filament organization	33/1382	228/17913	0.000339511	0.0037658	33	CXCL12/DSTN/TPM1/ID1/RHOC/EPS8/SFRP1/PLEKHH2/SLIT2/CTTN/LIMCH1/CDC42EP5/DLC1/NRP1/NCKAP1/PFN2/LMOD1/SCIN/KIRREL1/LIMA1/SORBS3/ABI2/SDC4/MYO1C/S100A10/WASL/GSN/PHLDB2/ROCK2/CFL2/RDX/SNX9/FLNA
GO:0050730	regulation of peptidyl-tyrosine phosphorylation	33/1382	245/17913	0.0012155	0.0105047	33	GAS6/CAV1/THY1/FGF7/HES1/ERRFI1/NTRK2/SFRP1/AGT/ANGPT1/NRP1/KITLG/ENPP2/GHR/PDGFA/FGFR3/EGFR/GPRC5A/CSPG4/EFNA5/CD81/IL6ST/SOCS3/PDGFC/APP/PDGFD/TNFRSF1A/IGF1/MIF/SHC1/RACK1/YES1/VEGFA
GO:0050768	negative regulation of neurogenesis	33/1382	271/17913	0.0060928	0.0367619	33	COL3A1/APOE/LGALS1/LRP1/ID4/ID1/PTN/THY1/HES1/PMP22/NOTCH3/TMEM98/SLIT2/IRX3/DPYSL3/NRP1/SOX9/NGFR/DAAM2/PTPRG/DIXDC1/JAG1/PTK2/PBX1/VIM/APP/SPP1/CTNNA1/RYK/CALR/CTNNB1/FKBP4/ITM2C
GO:0030522	intracellular receptor signaling pathway	33/1382	272/17913	0.00643619	0.0384166	33	PMEPA1/NR2F2/SFRP1/TGFB1I1/TWIST1/RBFOX2/SNAI2/YAP1/PTGIS/KANK2/DAB2/PLPP1/HSPA1B/THRA/FHL2/DHRS3/AKR1C3/PARK7/HSPA1A/CALR/CTNNB1/RWDD1/PHB/RAN/NR4A1/FKBP4/PHB2/RPS27A/UBB/NOP53/C1QBP/LBH/AHR
GO:0048511	rhythmic process	33/1382	287/17913	0.0138435	0.0684418	33	SERPINF1/PTGDS/PTN/CAVIN3/PDGFRA/MDK/ADAMTS1/NTRK2/ZFHX3/AXL/SLIT2/SLIT3/TWIST1/NGFR/MAPK10/TIMP4/EGFR/KLF9/CST3/PAM/EGR1/MAGED1/JUN/ROCK2/HEBP1/RACK1/KLF10/IMPDH2/INHBA/HNRNPR/HSPA5/BHLHE40/AHR
GO:0009101	glycoprotein biosynthetic process	33/1382	302/17913	0.0270088	0.111429	33	DCN/BGN/ACAN/RAMP1/A4GALT/TUSC3/CSPG4/DSEL/CHST3/TMTC1/UGDH/PAWR/TCF7L2/VCAN/VEGFB/EXT2/BMPR2/OSTC/DAD1/IGF1/MCFD2/TRIP11/CTNNB1/PHLDA1/TMEM59/LMAN1/DPM3/KRTCAP2/PGM3/TMEM165/ITM2B/TMEM258/OST4
GO:0051056	regulation of small GTPase mediated signal transduction	33/1382	316/17913	0.0466026	0.16293	33	COL3A1/APOE/PDGFRB/RHOC/A2M/SLIT2/CSF1/FARP1/DLC1/NRP1/KITLG/SRGAP1/PSD3/SYDE1/ARHGEF17/RHOB/KANK2/ITGB1/SRGAP3/CHN1/TIMP2/ARHGAP21/NET1/PPP2CB/ARHGAP10/ARHGEF12/FAM13A/IGF1/RDX/SHC1/ARHGAP5/ABL2/SQSTM1
GO:0002218	activation of innate immune response	33/1382	319/17913	0.0519095	0.175677	33	CAV1/S100A1/CTSK/CTSL/COLEC12/HSPA1B/PSMB5/HSPA1A/PSMC3/PSMB6/PSMB1/CTSB/SKP1/IFI16/PSMD8/HEXIM1/RPS27A/UBB/HSPD1/NOP53/C1QBP/PSMD2/RFTN1/PSMA3/PSMC5/PSMD3/PSMB7/PSMC1/PSMA2/PSMA1/HSP90B1/PSMC4/PSME2
GO:0042775	mitochondrial ATP synthesis coupled electron transport	32/1382	89/17913	3.62156e-14	5.91912e-12	32	NDUFS4/PARK7/NDUFC2/NDUFB4/COX6C/DNAJC15/NDUFB7/NDUFC1/NDUFB2/NDUFA8/NDUFA5/NDUFS5/NDUFA4/NDUFAB1/NDUFA12/NDUFB10/ISCU/NDUFA13/NDUFB5/UQCRQ/NDUFV2/NDUFB6/COX6A1/UQCC3/CYC1/NDUFB8/NDUFA6/NDUFA11/NDUFB3/COX7C/UQCRH/UQCRB
GO:0042773	ATP synthesis coupled electron transport	32/1382	90/17913	5.20892e-14	8.04055e-12	32	NDUFS4/PARK7/NDUFC2/NDUFB4/COX6C/DNAJC15/NDUFB7/NDUFC1/NDUFB2/NDUFA8/NDUFA5/NDUFS5/NDUFA4/NDUFAB1/NDUFA12/NDUFB10/ISCU/NDUFA13/NDUFB5/UQCRQ/NDUFV2/NDUFB6/COX6A1/UQCC3/CYC1/NDUFB8/NDUFA6/NDUFA11/NDUFB3/COX7C/UQCRH/UQCRB
GO:0002576	platelet degranulation	32/1382	128/17913	1.79647e-09	1.17447e-07	32	CLU/FN1/SPARC/TIMP1/SERPING1/SELENOP/RARRES2/TIMP3/GAS6/LGALS3BP/A2M/TF/ISLR/PDGFA/MAGED2/CD9/CFD/CD63/APP/THBS1/STXBP1/ANXA5/VEGFB/ENDOD1/CD109/SOD1/IGF1/FAM3C/MANF/VEGFA/FLNA/OLA1
GO:0072073	kidney epithelium development	32/1382	140/17913	1.89266e-08	9.64909e-07	32	FOXC1/FGFR1/HES1/PGF/SFRP1/FOXC2/SLIT2/AGT/LAMB2/WWTR1/IRX3/YAP1/SOX9/FOXD1/NPNT/SIX1/JAG1/KANK2/SDC4/PBX1/LZTS2/AHI1/PKD1/MAGED1/SMAD5/ILK/SPRY1/MYC/MEF2C/CTNNB1/SMAD7/VEGFA
GO:0031960	response to corticosteroid	32/1382	155/17913	2.36134e-07	8.57645e-06	32	COL1A1/SPARC/IGFBP7/SERPINF1/BGLAP/MDK/ERRFI1/CDO1/CCND1/HNMT/SLIT2/SLIT3/PAPPA/EGFR/KLF9/PAM/ALPL/S100B/ENG/FBXO32/ZFP36L1/BAD/AKR1C3/CDKN1A/GSTP1/FOSB/RAN/IGFBP2/FOS/ZFP36/DDIT4/EIF4EBP1
GO:0007369	gastrulation	32/1382	178/17913	5.59652e-06	0.000126422	32	FN1/COL6A1/FOXC1/COL5A2/FGFR1/COL11A1/MMP2/COL5A1/COL12A1/ITGB5/COL8A1/SFRP1/FOXC2/MMP14/COL4A2/LAMB1/ITGA7/PHLDB1/UGDH/TWSG1/ITGB1/ITGAV/KLF4/SNAI1/EXT2/PHLDB2/BMPR2/ITGA8/CTNNB1/RACK1/HSBP1/INHBA
GO:0010952	positive regulation of peptidase activity	32/1382	180/17913	7.12788e-06	0.000152933	32	FN1/PCOLCE/FBLN1/CAV1/BEX3/RCN3/DLC1/NGFR/ANTXR1/ASPH/PCOLCE2/APP/GSN/ROCK2/BAD/MYC/PDCD5/IFT57/MTCH1/FAM162A/FIS1/DAP/RPS27L/RACK1/IFI16/HSPE1/ARL6IP5/HSPD1/NDUFA13/RPS3/PRELID1/CYCS
GO:1902749	regulation of cell cycle G2/M phase transition	32/1382	202/17913	7.63325e-05	0.00109044	32	FHL1/CCND1/SMARCD3/PBX1/PSMB5/APP/DYNLL1/YWHAE/DYNC1I2/NPM1/PSMC3/PSMB6/PSMB1/TUBB/SKP1/PSMD8/DCTN2/TUBA1A/NOP53/HSP90AA1/PSMD2/PSMA3/TUBB4B/PSMC5/PSMD3/PSMB7/PSMC1/PSMA2/AKAP9/PSMA1/PSMC4/PSME2
GO:0051495	positive regulation of cytoskeleton organization	32/1382	205/17913	0.000101637	0.00138771	32	DSTN/TPM1/MAP1B/ID1/RHOC/SFRP1/CTTN/LIMCH1/CDC42EP5/NRP1/NCKAP1/PFN2/LMOD1/SCIN/KIRREL1/SORBS3/ABI2/SDC4/HSPA1B/MYO1C/S100A10/WASL/GSN/ROCK2/CFL2/ARL2/HSPA1A/SNX9/PFDN2/FLNA/RPS3/AKAP9
GO:0048588	developmental cell growth	32/1382	216/17913	0.00027172	0.0031523	32	FN1/APOE/CXCL12/LRP1/MAP1B/NRP2/SORBS2/SLIT2/AGT/LAMB2/CTTN/SLIT3/NDN/NRP1/SOX9/TMEM108/EFNA5/DCLK1/TNFRSF12A/ITGB1/APP/PDLIM5/BMPR2/HSP90AB1/SPP1/ILK/IGF1/RYK/DPYSL2/CTNNB1/HSP90AA1/VEGFA
GO:0008406	gonad development	32/1382	217/17913	0.000295675	0.00341342	32	FOXC1/PDGFRB/NUPR1/PDGFRA/ADAMTS1/GJA1/RHOBTB3/CCND1/SFRP1/MMP14/SLIT2/SLIT3/SOX9/KITLG/HOXA10/CST3/ANG/PRDX4/ARID5B/SOD1/YBX3/RAB13/CTNNA1/AKR1C3/PHB/UBB/ERCC1/VEGFA/INHBA/FLNA/HSPA5/EIF2S2
GO:2000116	regulation of cysteine-type endopeptidase activity	32/1382	222/17913	0.000445916	0.00464037	32	CRYAB/GAS6/BEX3/DLC1/NGFR/ASPH/THBS1/KLF4/GSN/YWHAE/BAD/MYC/MGMT/PDCD5/PARK7/IFT57/MTCH1/FAM162A/FIS1/DAP/RPS27L/RACK1/IFI16/HSPE1/ARL6IP5/PRDX3/HSPD1/NDUFA13/VEGFA/RPS3/IFI6/CYCS
GO:0045137	development of primary sexual characteristics	32/1382	223/17913	0.000483014	0.00491595	32	FOXC1/PDGFRB/NUPR1/PDGFRA/ADAMTS1/GJA1/RHOBTB3/CCND1/SFRP1/MMP14/SLIT2/SLIT3/SOX9/KITLG/HOXA10/CST3/ANG/PRDX4/ARID5B/SOD1/YBX3/RAB13/CTNNA1/AKR1C3/PHB/UBB/ERCC1/VEGFA/INHBA/FLNA/HSPA5/EIF2S2
GO:0051402	neuron apoptotic process	32/1382	238/17913	0.00147202	0.0121006	32	LRP1/NUPR1/MDK/CHL1/NTRK2/AXL/ANGPT1/UNC5B/NRP1/NGFR/NDNF/SIX1/ITGA1/BACE1/APP/STXBP1/RETREG1/CCL2/BNIP3/ATN1/SOD1/JUN/HSP90AB1/ILK/ADARB1/PARK7/MEF2C/CTNNB1/FAM162A/FIS1/HSPA5/SET
GO:0051896	regulation of protein kinase B signaling	32/1382	241/17913	0.00180696	0.0142228	32	IGFBP5/FGFR1/PDGFRB/GAS6/CAVIN3/FGF7/PDGFRA/RRAS/RCN3/C1QTNF1/ANGPT1/KITLG/AKR1C2/PDGFA/FGFR3/PHLDA3/EGFR/PTK2/TCF7L2/ITGB1/THBS1/ENG/KLF4/HSP90AB1/ILK/AKR1C3/MYDGF/PARK7/RACK1/NOP53/HSP90AA1/C1QBP
GO:0031330	negative regulation of cellular catabolic process	32/1382	244/17913	0.0022058	0.0166541	32	TIMP1/LEPR/TIMP3/NUPR1/MAP1A/CST3/FEZ1/ANXA2/PTK2/LAPTM4B/YBX3/HSP90AB1/RPL5/RRAGA/MTMR2/PARK7/ATRAID/DAP/CIRBP/ERLEC1/CAMLG/RPL11/OS9/YBX1/NOP53/SNRNP70/TOB1/HNRNPA0/RNF5/UBXN1/ZFP36/DDIT4
GO:0060326	cell chemotaxis	32/1382	253/17913	0.00388654	0.0260839	32	CXCL12/VCAM1/RARRES2/FGFR1/PDGFRB/GAS6/PTN/PDGFRA/MDK/NBL1/SMOC2/LOX/SLIT2/CSF1/PARVA/NRP1/JAM3/HSPB1/ITGA1/THBS1/CCL2/PDGFD/RAB13/GSTP1/LGALS3/MIF/SBDS/CALR/NR4A1/RPS19/C1QBP/VEGFA
GO:0060047	heart contraction	32/1382	275/17913	0.0129333	0.0648066	32	TPM1/EPAS1/CAV1/FXYD1/GJA1/S100A1/AGT/PLN/TBX2/HEY2/PDE5A/ANK2/ASPH/FXYD6/THRA/VEGFB/SMAD5/SOD1/CAMK2D/YWHAE/AHCYL1/ATP5PF/MEF2A/SMAD7/SRI/CALM2/ATP2A2/GSTO1/ATP1A1/FLNA/AKAP9/GLRX3
GO:0000209	protein polyubiquitination	32/1382	288/17913	0.0236427	0.101375	32	SASH1/FBXO17/LMO7/PSMB5/NFE2L1/FBXO32/SHPRH/IFI27/CTNNB1/PSMC3/PSMB6/PSMB1/UBE2E3/TTC3/SKP1/ANAPC11/PSMD8/RPS27A/UBB/STUB1/PSMD2/PSMA3/PSMC5/PSMD3/PSMB7/PSMC1/PSMA2/RNF5/PSMA1/CDC26/PSMC4/PSME2
GO:0032147	activation of protein kinase activity	32/1382	303/17913	0.0435116	0.156704	32	EMP2/GAS6/AGT/ANGPT1/GPRC5C/MAPK10/GHR/EGFR/GPRC5A/CSPG4/EFNA5/ITGA1/CD81/ANG/PDGFC/THBS1/GADD45B/ADCY3/SOD1/HACD3/MAP3K20/IGF1/PARK7/PRDX2/COPS8/SHC1/PEA15/MDFIC/RPS27A/UBB/VEGFA/GADD45A
GO:0001505	regulation of neurotransmitter levels	32/1382	321/17913	0.0812361	0.236846	32	CLU/CYP1B1/CAV1/HNMT/AGT/SLC7A2/PFN2/PPFIA2/ALDH7A1/PTGIS/NRXN2/SNCG/BACE1/STXBP1/GCSH/GPM6B/DDAH2/KLF4/SLC29A1/COMT/SLC1A3/ROCK2/HSP90AB1/PHGDH/PARK7/MEF2C/PNKD/ARL6IP5/ATP2A2/HSP90AA1/HSPA8/KLF2
GO:0051260	protein homooligomerization	32/1382	345/17913	0.159564	0.376517	32	CLU/APOE/CRYAB/ANGPTL4/CAV1/RHOC/EMILIN1/C1QTNF1/COLEC12/GPX3/PLN/DPYSL3/SCARA5/AKR1C1/ALDH1A3/PAM/CBY1/MIF/KCTD12/ATL3/PRMT1/FIS1/DYNC1LI2/RACK1/ST13/STEAP4/PKM/TGM2/IMPDH2/ATXN10/FUS/MARCKS
GO:0010959	regulation of metal ion transport	32/1382	365/17913	0.249182	0.485011	32	CXCL12/SERPINE2/PDGFRB/CAV1/THY1/FXYD1/GJA1/S100A1/FHL1/TF/GEM/AGT/PLN/ANK2/MYLK/CD63/AHNAK/CCL2/RRAD/CAMK2D/YWHAE/SESTD1/LGALS3/CTNNB1/AHCYL1/SRI/CALM2/ISCU/GSTO1/ATP1A1/FLNA/AKAP9
GO:0050708	regulation of protein secretion	32/1382	456/17913	0.73911	0.879251	32	FN1/APOE/LRP1/GAS6/MDK/GJA1/LPL/SFRP1/RBP4/TWIST1/ANGPT1/EGFR/EFNA5/AKAP12/PAM/CADM1/SOX4/TCF7L2/ANG/MYH10/PHPT1/BAD/IGF1/ARL2/MIF/HMGN3/NDUFAF2/SRI/SLC25A6/PPIA/JAGN1/SLC25A5
GO:0002791	regulation of peptide secretion	32/1382	483/17913	0.84062	0.933095	32	FN1/APOE/LRP1/GAS6/MDK/GJA1/LPL/SFRP1/RBP4/TWIST1/ANGPT1/EGFR/EFNA5/AKAP12/PAM/CADM1/SOX4/TCF7L2/ANG/MYH10/PHPT1/BAD/IGF1/ARL2/MIF/HMGN3/NDUFAF2/SRI/SLC25A6/PPIA/JAGN1/SLC25A5
GO:0017015	regulation of transforming growth factor beta receptor signaling pathway	31/1382	115/17913	4.30226e-10	3.23076e-08	31	HTRA1/FBN1/CAV1/PMEPA1/CDKN1C/EMILIN1/ASPN/LTBP1/VASN/CAV2/TGFB1I1/LOX/DKK3/BAMBI/NPNT/ZNF703/LTBP4/DAB2/THBS1/ENG/CD109/HSP90AB1/ITGA8/HSPA1A/ZEB1/SMAD7/RPS27A/UBB/STUB1/FAM89B/HSPA5
GO:1903844	regulation of cellular response to transforming growth factor beta stimulus	31/1382	117/17913	6.86508e-10	5.01964e-08	31	HTRA1/FBN1/CAV1/PMEPA1/CDKN1C/EMILIN1/ASPN/LTBP1/VASN/CAV2/TGFB1I1/LOX/DKK3/BAMBI/NPNT/ZNF703/LTBP4/DAB2/THBS1/ENG/CD109/HSP90AB1/ITGA8/HSPA1A/ZEB1/SMAD7/RPS27A/UBB/STUB1/FAM89B/HSPA5
GO:0002478	antigen processing and presentation of exogenous peptide antigen	31/1382	174/17913	9.41886e-06	0.000190329	31	ITGB5/CTSL/CTSF/PSMB5/ITGAV/DYNLL1/DYNC1I2/KIFAP3/CALR/PSMC3/PSMB6/SEC31A/PSMB1/DYNC1LI2/PDIA3/CLTA/PSMD8/DCTN2/AP1S1/PSMD2/AP2M1/DCTN6/PSMA3/PSMC5/PSMD3/PSMB7/PSMC1/PSMA2/PSMA1/PSMC4/PSME2
GO:0019884	antigen processing and presentation of exogenous antigen	31/1382	176/17913	1.19507e-05	0.000235496	31	ITGB5/CTSL/CTSF/PSMB5/ITGAV/DYNLL1/DYNC1I2/KIFAP3/CALR/PSMC3/PSMB6/SEC31A/PSMB1/DYNC1LI2/PDIA3/CLTA/PSMD8/DCTN2/AP1S1/PSMD2/AP2M1/DCTN6/PSMA3/PSMC5/PSMD3/PSMB7/PSMC1/PSMA2/PSMA1/PSMC4/PSME2
GO:0010389	regulation of G2/M transition of mitotic cell cycle	31/1382	185/17913	3.2934e-05	0.000525902	31	FHL1/CCND1/SMARCD3/PBX1/PSMB5/APP/DYNLL1/YWHAE/DYNC1I2/PSMC3/PSMB6/PSMB1/TUBB/SKP1/PSMD8/DCTN2/TUBA1A/NOP53/HSP90AA1/PSMD2/PSMA3/TUBB4B/PSMC5/PSMD3/PSMB7/PSMC1/PSMA2/AKAP9/PSMA1/PSMC4/PSME2
GO:0048002	antigen processing and presentation of peptide antigen	31/1382	188/17913	4.52692e-05	0.00070054	31	ITGB5/CTSL/CTSF/PSMB5/ITGAV/DYNLL1/DYNC1I2/KIFAP3/CALR/PSMC3/PSMB6/SEC31A/PSMB1/DYNC1LI2/PDIA3/CLTA/PSMD8/DCTN2/AP1S1/PSMD2/AP2M1/DCTN6/PSMA3/PSMC5/PSMD3/PSMB7/PSMC1/PSMA2/PSMA1/PSMC4/PSME2
GO:1901991	negative regulation of mitotic cell cycle phase transition	31/1382	235/17913	0.00233849	0.0174899	31	FHL1/CCND1/GPNMB/KANK2/SOX4/PSMB5/KLF4/CCL2/ZFP36L1/CDKN1A/PRMT1/PSMC3/PSMB6/RPS27L/PSMB1/SKP1/PSMD8/PSMG2/NOP53/RPL26/PSMD2/PSMA3/PSMC5/PSMD3/PSMB7/PSMC1/PSMA2/PSMA1/GADD45A/PSMC4/PSME2
GO:0038093	Fc receptor signaling pathway	31/1382	241/17913	0.00344718	0.023841	31	NCKAP1/MAPK10/DOCK1/PTK2/MYO10/PSMB5/MYO1C/WASL/JUN/HSP90AB1/ARPC1A/SHC1/PSMC3/PSMB6/PSMB1/SKP1/PSMD8/YES1/HSP90AA1/PSMD2/PSMA3/PSMC5/PSMD3/PSMB7/PSMC1/PSMA2/PSMA1/FOS/PSMC4/PSME2/ACTG1
GO:0043406	positive regulation of MAP kinase activity	31/1382	250/17913	0.00592925	0.035814	31	FGFR1/PDGFRB/FZD8/KITLG/SASH1/MAPK10/GHR/PDGFA/EGFR/PDE5A/CSPG4/ITGA1/CD81/THBS1/GADD45B/MAGED1/SOD1/HACD3/ILK/MAP3K20/IGF1/MIF/PRDX2/SHC1/PEA15/MDFIC/RPS27A/UBB/VEGFA/RPS3/GADD45A
GO:0031668	cellular response to extracellular stimulus	31/1382	251/17913	0.00627992	0.0378498	31	COL1A1/TNC/VCAM1/BGLAP/GAS6/PTN/LPL/SFRP1/AXL/PDK4/SNAI2/KANK2/COMT/SOD1/JUN/ATF3/BMPR2/AKR1C3/CDKN1A/GSTP1/RRAGA/DAP/DNAJC15/IFI16/KLF10/HSPA8/HNRNPA1/TXN2/HSPA5/HSP90B1/FOS
GO:1901988	negative regulation of cell cycle phase transition	31/1382	254/17913	0.00743727	0.0428802	31	FHL1/CCND1/GPNMB/KANK2/SOX4/PSMB5/KLF4/CCL2/ZFP36L1/CDKN1A/PRMT1/PSMC3/PSMB6/RPS27L/PSMB1/SKP1/PSMD8/PSMG2/NOP53/RPL26/PSMD2/PSMA3/PSMC5/PSMD3/PSMB7/PSMC1/PSMA2/PSMA1/GADD45A/PSMC4/PSME2
GO:1903522	regulation of blood circulation	31/1382	292/17913	0.0436857	0.157026	31	TPM1/EPAS1/CAV1/FXYD1/GJA1/S100A1/AGT/PLN/TBX2/HEY2/EGFR/PDE5A/ANK2/ASPH/FXYD6/THRA/CAMK2D/BMPR2/YWHAE/AHCYL1/ATP5PF/MEF2A/SMAD7/SRI/CALM2/ATP2A2/GSTO1/ATP1A1/FLNA/AKAP9/GLRX3
GO:0002758	innate immune response-activating signal transduction	31/1382	298/17913	0.054676	0.18021	31	CAV1/S100A1/CTSK/CTSL/COLEC12/HSPA1B/PSMB5/HSPA1A/PSMC3/PSMB6/PSMB1/CTSB/SKP1/PSMD8/RPS27A/UBB/HSPD1/NOP53/C1QBP/PSMD2/RFTN1/PSMA3/PSMC5/PSMD3/PSMB7/PSMC1/PSMA2/PSMA1/HSP90B1/PSMC4/PSME2
GO:0006470	protein dephosphorylation	31/1382	313/17913	0.0906221	0.253059	31	PDGFRB/PTN/PLPP3/TNS2/DLC1/PTPN13/PTPRD/RCAN2/PTPRG/PTPN14/IGFBP3/ITGA1/PLPP1/PPP1R14A/BOD1/ROCK2/YWHAE/HSP90AB1/PPP2CB/PHPT1/DUSP14/LGALS3/MTMR2/CAMTA1/RCAN1/CALM2/PPP1R14B/PPP1R15A/HSP90B1/SET/CYCS
GO:0003002	regionalization	31/1382	318/17913	0.105492	0.281295	31	FOXC1/FGFR1/HES1/NBL1/NR2F2/MDFI/NRP2/SFRP1/FOXC2/IRX3/NRP1/HOXA10/FOXD1/INTU/DYNC2H1/HEY2/SIX1/MAFB/SMARCD3/PBX1/TULP3/AHI1/SNAI1/PCSK5/BMPR2/DPCD/SPRY1/IFT57/MEF2C/CTNNB1/TMED2
GO:0051222	positive regulation of protein transport	31/1382	403/17913	0.534436	0.780615	31	LRP1/GAS6/MDK/GJA1/LPL/RBP4/TWIST1/EGFR/AKAP12/CADM1/CD81/SOX4/TCF7L2/ANG/BAG3/MYO1C/LEPROT/MYH10/YWHAE/PHPT1/BAD/IGF1/PDCD5/MIF/FIS1/RACK1/RAN/SRI/PPIA/FLNA/TOMM7
GO:0044282	small molecule catabolic process	31/1382	404/17913	0.540205	0.780615	31	CDO1/HNMT/TWIST1/BDH2/NT5E/ALDH7A1/GCSH/DDAH2/ESD/ACADVL/BAD/AKR1C3/MTMR2/ALDH2/BCAT1/ECH1/PNKD/ETFB/HADHB/ACAA2/TPI1/ECHS1/PKM/HEXB/PFKP/AKR1A1/PGAM1/NUDT5/TXN2/HADHA/ENO1
GO:0001764	neuron migration	30/1382	152/17913	1.51055e-06	4.21816e-05	30	COL3A1/CXCL12/FGFR1/MAP1B/GAS6/MDK/NR2F2/GJA1/CHL1/NTRK2/NRP2/AXL/TWIST1/SATB2/NDN/NRP1/FLRT2/NDNF/PRKG1/DCLK1/PTK2/APBB2/PLXNB2/MYH10/YWHAE/MEF2C/CTNNB1/VEGFA/FLNA/DDIT4
GO:0030177	positive regulation of Wnt signaling pathway	30/1382	170/17913	1.58074e-05	0.000296058	30	COL1A1/SFRP4/CAV1/DLX5/SFRP1/SULF1/YAP1/ADGRA2/DAAM2/BAMBI/EGFR/DIXDC1/DAB2/SOX4/PSMB5/ILK/PSMC3/PSMB6/PSMB1/PSMD8/PSMD2/PSMA3/PSMC5/PSMD3/PSMB7/PSMC1/PSMA2/PSMA1/PSMC4/PSME2
GO:0051099	positive regulation of binding	30/1382	181/17913	5.40535e-05	0.000820698	30	APOE/FOXC1/LRP1/CAV1/HES1/TWIST1/LARP6/NRP1/BAMBI/ANXA2/TCF7L2/APP/KLF4/PKD1/S100A10/CTHRC1/HSP90AB1/PPP2CB/IGF1/LGALS3/PARK7/MEF2C/CTNNB1/EDF1/PLXND1/RAN/RPL11/CALM2/NME1/EIF3D
GO:0070555	response to interleukin-1	30/1382	183/17913	6.6615e-05	0.000973785	30	TFPI/HNMT/SFRP1/SOX9/PTGIS/IL1R1/AKAP12/EGR1/PSMB5/APP/CCL2/PSMC3/PSMB6/PSMB1/SKP1/PSMD8/RPS27A/SQSTM1/UBB/PSMD2/PSMA3/PSMC5/PSMD3/PSMB7/PSMC1/KLF2/PSMA2/PSMA1/PSMC4/PSME2
GO:0043281	regulation of cysteine-type endopeptidase activity involved in apoptotic process	30/1382	196/17913	0.00023479	0.00278193	30	CRYAB/GAS6/BEX3/DLC1/NGFR/THBS1/KLF4/GSN/YWHAE/BAD/MYC/MGMT/PDCD5/PARK7/IFT57/MTCH1/FAM162A/FIS1/DAP/RPS27L/RACK1/HSPE1/ARL6IP5/PRDX3/HSPD1/NDUFA13/VEGFA/RPS3/IFI6/CYCS
GO:0051701	interaction with host	30/1382	211/17913	0.000831427	0.00768759	30	IFITM3/LGALS1/GAS6/CAV1/NCAM1/ITGB5/AXL/CAV2/EGFR/CD81/HSPA1B/ITGB1/ITGAV/SCARB2/GSN/NECTIN2/GUCY1A1/CTNND1/BAD/RRAGA/HSPA1A/CTNNB1/TRIM8/CTSB/SIVA1/SLC25A6/IFITM1/TCP1/PPIA/P4HB
GO:0031334	positive regulation of protein complex assembly	30/1382	239/17913	0.00564937	0.034689	30	CLU/MAP1B/RHOC/CTTN/TWIST1/CDC42EP5/NCKAP1/PFN2/LMOD1/SCIN/KIRREL1/ABI2/HSPA1B/MYO1C/WASL/GSN/JUN/FSCN1/ARL2/HSPA1A/CTNNB1/GTF2H5/SNX9/RACK1/HSP90AA1/STUB1/ERCC1/VEGFA/RPS3/AKAP9
GO:0009410	response to xenobiotic stimulus	30/1382	270/17913	0.027741	0.11419	30	SERPINF1/CYP1B1/EPHX1/ERRFI1/FMO2/CDO1/HNMT/FMO3/GSTM3/AKR1C1/GHR/EGFR/EGR1/AOC3/CYB5R3/MGST3/SOD1/FBXO32/HSP90AB1/PHGDH/GSTP1/FOSB/CES1/PTGES3/PEA15/GSTO1/HSPA5/AHR/DDIT4/EIF4EBP1
GO:0051403	stress-activated MAPK cascade	30/1382	271/17913	0.028979	0.117373	30	CRYAB/SFRP1/AGT/FZD8/CDC42EP5/SASH1/MAPK10/EGFR/LTBR/APP/PRDX1/GADD45B/ZFP36L1/HACD3/MAP3K20/MYC/GSTP1/PRMT1/SPHK1/SKP1/STK25/MDFIC/ARL6IP5/RPS27A/UBB/VEGFA/RPS3/DNAJA1/GADD45A/ZFP36
GO:0031098	stress-activated protein kinase signaling cascade	30/1382	278/17913	0.038871	0.142956	30	CRYAB/SFRP1/AGT/FZD8/CDC42EP5/SASH1/MAPK10/EGFR/LTBR/APP/PRDX1/GADD45B/ZFP36L1/HACD3/MAP3K20/MYC/GSTP1/PRMT1/SPHK1/SKP1/STK25/MDFIC/ARL6IP5/RPS27A/UBB/VEGFA/RPS3/DNAJA1/GADD45A/ZFP36
GO:0016485	protein processing	30/1382	295/17913	0.0731399	0.218875	30	CLU/CFH/SERPINE2/SERPING1/C1R/C1S/A2M/TMEM98/MMP14/GAS1/ENPEP/ADAMTS2/DYNC2H1/ASPH/CD81/COMP/THBS1/PCSK5/GSN/CD59/BAD/TMEM59/CES1/CAPN2/IFI16/PHB/STOML2/C1QBP/METAP2/ENO1
GO:0045667	regulation of osteoblast differentiation	29/1382	128/17913	1.06425e-07	4.28554e-06	29	IGFBP5/ID3/ID4/ID1/GJA1/DDR2/FAM20C/SFRP1/TWIST1/TMEM119/SNAI2/NPNT/JAG1/TWSG1/RUNX2/PTK2/IL6ST/CEBPD/SMAD5/CTHRC1/BMPR2/ILK/IGF1/MEF2C/ATRAID/CTNNB1/GNAS/IFITM1/TOB1
GO:0030705	cytoskeleton-dependent intracellular transport	29/1382	154/17913	5.95763e-06	0.000132543	29	MAP1B/DST/TMEM108/DYNC2H1/MAP1A/HSPB1/FEZ1/MYO10/BAG3/APP/MYO1C/ARL3/ARHGAP21/SOD1/DYNLL1/WASL/IFT43/PURA/SUN1/IFT57/KIFAP3/TRIP11/KIF1C/TUBA1C/TUBB/TUBA1B/TUBA1A/UBB/DYNLRB1
GO:0033209	tumor necrosis factor-mediated signaling pathway	29/1382	167/17913	2.96916e-05	0.000490417	29	GAS6/CCDC3/TNFRSF11B/LTBR/HSPA1B/TNFRSF12A/PSMB5/TNFSF12/TNFRSF1A/ILK/GSTP1/HSPA1A/PSMC3/SPPL2A/PSMB6/SPHK1/PSMB1/RACK1/PSMD8/PSMD2/PSMA3/PSMC5/PSMD3/PSMB7/PSMC1/PSMA2/PSMA1/PSMC4/PSME2
GO:1903034	regulation of response to wounding	29/1382	173/17913	5.79242e-05	0.000862961	29	APOE/SERPINE2/SERPING1/LRP1/CAV1/PTN/PDGFRA/PLPP3/TFPI/MDK/GJA1/C1QTNF1/FOXC2/SMOC2/PDPN/PDGFA/PRKG1/FAP/MYLK/CD9/TNFRSF12A/THBS1/VKORC1/KLF4/CD109/PHLDB2/SPP1/CDKN1A/PRDX2
GO:1903050	regulation of proteolysis involved in cellular protein catabolic process	29/1382	198/17913	0.00062139	0.00603683	29	CLU/APOE/NUPR1/CAV1/MAP1A/DAB2/PTK2/PKD1/NFE2L1/HSP90AB1/MAGEF1/RPL5/PARK7/HSPA1A/PSMC3/ERLEC1/RACK1/CAMLG/SMAD7/RPL11/OS9/UBB/NOP53/STUB1/PSMC5/PSMC1/UBXN1/SUMO2/PSMC4
GO:0002573	myeloid leukocyte differentiation	29/1382	201/17913	0.000794582	0.00745588	29	BGLAP/FBN1/FAM20C/SFRP1/CSF1/KITLG/SH3PXD2A/MAFB/ANXA2/CD81/LTBR/APP/CD109/JUN/ZFP36L1/MYC/TOB2/MEF2C/CTNNB1/GNAS/IFI16/GLO1/KLF10/NME1/JUNB/VEGFA/INHBA/JAGN1/FOS
GO:0050792	regulation of viral process	29/1382	204/17913	0.00100858	0.00896746	29	APOE/IFITM3/LGALS1/CAV2/GSN/JUN/NECTIN2/HACD3/NUCKS1/PPIB/ADARB1/POLR2F/IFI27/BANF1/TRIM8/PSMC3/POLR2H/IFI16/POLR2E/MDFIC/POLR2I/IFITM1/MPHOSPH8/PPIA/HSPA8/P4HB/POLR2L/POLR2K/ZFP36
GO:0045444	fat cell differentiation	29/1382	222/17913	0.00365903	0.0248573	29	ADIRF/FRZB/RARRES2/WIF1/ID4/HES1/LPL/ENPP1/CCND1/SFRP1/TGFB1I1/WWTR1/MEDAG/SNAI2/CCDC3/RUNX1T1/JAG1/TCF7L2/CBY1/CEBPD/SAV1/KLF4/BNIP3/ARID5B/ZFP36L1/SDF4/NR4A1/STEAP4/ZFP36
GO:0051258	protein polymerization	29/1382	232/17913	0.00681084	0.0400506	29	MAP1B/EPS8/SLIT2/CTTN/CDC42EP5/NCKAP1/PFN2/LMOD1/WASF3/SCIN/KIRREL1/CAMSAP2/ABI2/ANG/HSPA1B/MYO1C/MAP7D3/WASL/GSN/GPX4/RDX/ARL2/HSPA1A/SNX9/VDAC2/FKBP4/HSP90AA1/RPS3/AKAP9
GO:0072659	protein localization to plasma membrane	29/1382	237/17913	0.00908411	0.0498818	29	LRP1/EMP2/GAS6/RAB34/MMP14/EHD2/EPHA3/RAMP1/EGFR/ANK2/DAB2/CD81/ITGB1/STXBP1/S100A10/AFDN/RAB13/ROCK2/TNFRSF1A/RDX/LGALS3/TMEM59/RER1/RACK1/OPTN/SQSTM1/TMED2/FLNA/AP2M1
GO:0033673	negative regulation of kinase activity	29/1382	244/17913	0.0132783	0.0661178	29	APOE/CAV1/THY1/CDKN1C/NR2F2/ERRFI1/RGS3/SFRP1/WWTR1/CAMK2N1/GPRC5A/SPRED1/HSPB1/SOCS3/GADD45B/ILK/DUSP14/ADARB1/CDKN1A/GSTP1/PARK7/NPM1/RACK1/COX11/PRDX3/HEXIM1/RTRAF/DNAJA1/GADD45A
GO:0008016	regulation of heart contraction	29/1382	249/17913	0.017138	0.0797619	29	TPM1/EPAS1/CAV1/FXYD1/GJA1/S100A1/AGT/PLN/TBX2/HEY2/PDE5A/ANK2/ASPH/FXYD6/THRA/CAMK2D/YWHAE/AHCYL1/ATP5PF/MEF2A/SMAD7/SRI/CALM2/ATP2A2/GSTO1/ATP1A1/FLNA/AKAP9/GLRX3
GO:0045637	regulation of myeloid cell differentiation	29/1382	250/17913	0.0180077	0.0826242	29	MYL9/BGLAP/FBN1/SFRP1/LOX/CSF1/RBFOX2/KITLG/SCIN/JAG1/MAFB/HSPA1B/THBS1/JUN/ZFP36L1/MYC/TOB2/LGALS3/HSPA1A/MEF2C/CTNNB1/PRMT1/GNAS/KLF10/NME1/EIF6/INHBA/FOS/ZFP36
GO:0070661	leukocyte proliferation	29/1382	270/17913	0.0438845	0.157638	29	CLU/VCAM1/HES1/GJA1/CD151/CSF1/KITLG/PDE5A/CD276/GPNMB/TWSG1/SDC4/CD81/IL6ST/PAWR/PURA/IGF1/CDKN1A/GSTP1/LGALS3/MIF/PRDX2/MEF2C/CTNNB1/IGFBP2/HSPD1/IMPDH2/RPS3/AHR
GO:0016050	vesicle organization	29/1382	280/17913	0.0642213	0.199557	29	SERPINE2/CAV1/RAB34/CAV2/SRPX/ANXA2/SDC4/EEA1/STXBP1/LAPTM4B/S100A10/SCARB2/WASL/CD59/NECTIN2/MCFD2/CHMP5/CALR/LMAN1/TFG/SPHK1/SEC31A/MVB12A/TMED9/TMED10/USO1/SQSTM1/TMED2/AP2M1
GO:0050863	regulation of T cell activation	29/1382	307/17913	0.149648	0.361406	29	LGALS1/VCAM1/CAV1/THY1/MDK/HES1/PDE5A/CD276/GPNMB/TWSG1/SDC4/CD81/IL6ST/PAWR/CCL2/SOD1/GSN/BAD/IGF1/LGALS3/PRDX2/CTNNB1/ZEB1/SMAD7/IGFBP2/YES1/HSPD1/RPS3/PRELID1
GO:0006909	phagocytosis	29/1382	308/17913	0.153707	0.366746	29	LEPR/LRP1/GAS6/MFGE8/RAB34/AXL/COLEC12/NCKAP1/SRPX/DOCK1/PTK2/MYO10/ITGB1/ITGAV/THBS1/MYO1C/CCL2/SOD1/WASL/GSN/HSP90AB1/ARPC1A/CALR/SPHK1/RACK1/YES1/HSP90AA1/TGM2/ACTG1
GO:0007159	leukocyte cell-cell adhesion	29/1382	328/17913	0.247304	0.483928	29	CXCL12/LGALS1/VCAM1/CAV1/THY1/MDK/HES1/NT5E/CERCAM/PDE5A/CD276/GPNMB/TWSG1/SDC4/CD81/IL6ST/PAWR/ITGB1/KLF4/CCL2/BAD/IGF1/LGALS3/PRDX2/SMAD7/IGFBP2/YES1/HSPD1/RPS3
GO:0043547	positive regulation of GTPase activity	29/1382	339/17913	0.30736	0.548843	29	RGS5/THY1/ERRFI1/RGS3/SFRP1/CAV2/DLC1/NRP1/SRGAP1/SYDE1/DOCK1/RIN2/ITGB1/SRGAP3/CHN1/RGS16/ARHGAP21/S100A10/NET1/JUN/AFDN/HACD3/ARHGAP10/ARHGEF12/FAM13A/SNX9/RACK1/ARHGAP5/RANBP1
GO:0044782	cilium organization	29/1382	346/17913	0.347858	0.593142	29	WWTR1/PARVA/FAM92A/CEP126/INTU/DYNC2H1/ARL3/AHI1/DYNLL1/GSN/IFT43/NECTIN2/YWHAE/MAP4/DYNC1I2/IFT57/KIFAP3/TRIP11/TUBB/DCTN2/TUBA1A/ODF2L/HSP90AA1/DYNLRB1/FLNA/TUBB4B/AKAP9/VDAC3/ATXN10
GO:0050804	modulation of chemical synaptic transmission	29/1382	393/17913	0.627387	0.819688	29	APOE/SERPINE2/MAP1B/CDH11/PTN/NTRK2/AGT/PFN2/TMEM108/SYNPO/EGFR/AKAP12/MAP1A/SNCG/BACE1/ITGB1/S100B/APP/STXBP1/CCL2/SLC1A3/GUCY1A1/MTMR2/MEF2C/PNKD/SQSTM1/ATP2A2/AKAP9/RPL22
GO:0099177	regulation of trans-synaptic signaling	29/1382	394/17913	0.632894	0.826166	29	APOE/SERPINE2/MAP1B/CDH11/PTN/NTRK2/AGT/PFN2/TMEM108/SYNPO/EGFR/AKAP12/MAP1A/SNCG/BACE1/ITGB1/S100B/APP/STXBP1/CCL2/SLC1A3/GUCY1A1/MTMR2/MEF2C/PNKD/SQSTM1/ATP2A2/AKAP9/RPL22
GO:0051047	positive regulation of secretion	29/1382	409/17913	0.710692	0.866078	29	CXCL12/LRP1/FGFR1/MDK/GJA1/LPL/C1QTNF1/RBP4/AGT/TWIST1/SCIN/EGFR/PLA2R1/AKAP12/CADM1/SDC4/SOX4/TCF7L2/ANG/STXBP1/MYH10/SPP1/PHPT1/BAD/IGF1/MIF/SRI/INHBA/PPIA
GO:0033108	mitochondrial respiratory chain complex assembly	28/1382	87/17913	3.09574e-11	2.77468e-09	28	NDUFS4/DMAC1/NDUFC2/NDUFB4/TIMMDC1/NDUFAF2/NDUFB7/NDUFC1/NDUFB2/NDUFAF3/COA4/NDUFA8/NDUFA5/NDUFS5/NDUFAB1/NDUFA12/NDUFB10/NDUFA13/NDUFB5/NDUFV2/NDUFB6/UQCC3/NDUFB8/NDUFA6/COX20/NDUFA11/NDUFB3/NDUFAF8
GO:0060840	artery development	28/1382	100/17913	1.16176e-09	8.06985e-08	28	COL3A1/APOE/FOXC1/LRP1/PDGFRB/MDK/PRRX1/HES1/NOTCH3/LTBP1/FOXC2/LOX/NRP1/TBX2/HEY2/SIX1/JAG1/MYLK/SOX4/COMP/ADAMTS9/ENG/MYH10/BMPR2/AKT3/PLXND1/SMAD7/VEGFA
GO:0032963	collagen metabolic process	28/1382	102/17913	1.90482e-09	1.23082e-07	28	COL1A1/COL1A2/PDGFRB/MMP2/ID1/EMILIN1/SERPINH1/ERRFI1/MRC2/COL5A1/CTSK/RCN3/CTSL/CYGB/MMP14/TNS2/LARP6/ADAMTS2/FAP/P3H4/COL13A1/CST3/COL15A1/ITGB1/VIM/ENG/CTSB/PEPD
GO:0051384	response to glucocorticoid	28/1382	139/17913	2.19526e-06	5.86492e-05	28	SPARC/IGFBP7/SERPINF1/BGLAP/MDK/ERRFI1/CDO1/CCND1/HNMT/SLIT2/SLIT3/PAPPA/EGFR/KLF9/PAM/ALPL/S100B/FBXO32/ZFP36L1/BAD/CDKN1A/GSTP1/FOSB/IGFBP2/FOS/ZFP36/DDIT4/EIF4EBP1
GO:0048754	branching morphogenesis of an epithelial tube	28/1382	146/17913	5.9629e-06	0.000132543	28	TNC/MDK/PGF/FOXC2/MMP14/COL4A1/SLIT2/AGT/CSF1/NRP1/YAP1/SOX9/EDNRA/FOXD1/NPNT/SIX1/CLIC4/PBX1/ENG/PKD1/MAGED1/ILK/SPRY1/MYC/CTNNB1/PLXND1/PHB2/VEGFA
GO:0001890	placenta development	28/1382	151/17913	1.15963e-05	0.000230145	28	DCN/HTRA1/EPAS1/PTN/CDKN1C/HES1/NR2F2/GJA1/MDFI/BMP5/HEY2/EGFR/PTGIS/PTK2/ANG/SOCS3/PHLDA2/PKD1/SNAI1/SOD1/ZFP36L1/BMPR2/HSP90AB1/SPP1/CTSB/PRDX3/JUNB/TMED2
GO:0071347	cellular response to interleukin-1	28/1382	156/17913	2.17289e-05	0.000383325	28	TFPI/SFRP1/SOX9/PTGIS/IL1R1/AKAP12/EGR1/PSMB5/CCL2/PSMC3/PSMB6/PSMB1/SKP1/PSMD8/RPS27A/SQSTM1/UBB/PSMD2/PSMA3/PSMC5/PSMD3/PSMB7/PSMC1/KLF2/PSMA2/PSMA1/PSMC4/PSME2
GO:0009142	nucleoside triphosphate biosynthetic process	28/1382	175/17913	0.000175739	0.00224502	28	NUPR1/AK1/NME3/ZBTB20/NME4/IGF1/ATP5MC3/ATP5PF/LDHA/ADK/TPI1/STOML2/ATP5MC1/NME1/EIF6/PKM/ATP5F1C/CMPK1/UQCC3/PFKP/PGAM1/ATP5PO/ATP5F1D/ATP5F1B/ATP5MF/ATP5ME/DDIT4/ENO1
GO:0048736	appendage development	28/1382	176/17913	0.000193919	0.00242705	28	FGFR1/PRRX1/NR2F2/GJA1/DLX5/TWIST1/SOX9/TBX2/HOXA10/FAM92A/INTU/DYNC2H1/DLX6/SHOX2/PAM/RUNX2/ASPH/SOX4/COMP/PBX1/TULP3/SLC39A1/PCSK5/BMPR2/MAP3K20/CTNNB1/COL2A1/GNAS
GO:0060173	limb development	28/1382	176/17913	0.000193919	0.00242705	28	FGFR1/PRRX1/NR2F2/GJA1/DLX5/TWIST1/SOX9/TBX2/HOXA10/FAM92A/INTU/DYNC2H1/DLX6/SHOX2/PAM/RUNX2/ASPH/SOX4/COMP/PBX1/TULP3/SLC39A1/PCSK5/BMPR2/MAP3K20/CTNNB1/COL2A1/GNAS
GO:0010565	regulation of cellular ketone metabolic process	28/1382	178/17913	0.000235372	0.0027829	28	CAV1/BMP5/TWIST1/PDK4/DKK3/EGR1/PSMB5/NFE2L1/COMT/ACADVL/AKR1C3/PARK7/PSMC3/PSMB6/PSMB1/INSIG2/PSMD8/EIF6/PSMD2/PSMA3/PSMC5/PSMD3/PSMB7/PSMC1/PSMA2/PSMA1/PSMC4/PSME2
GO:0002685	regulation of leukocyte migration	28/1382	186/17913	0.000490743	0.00496732	28	CXCL12/APOD/RARRES2/GAS6/PTN/THY1/MDK/NBL1/EMILIN1/BMP5/MMP14/SLIT2/CSF1/KITLG/JAM3/IL1R1/CD9/CD81/APP/THBS1/CCL2/PDGFD/WASL/LGALS3/MIF/CALR/C1QBP/VEGFA
GO:0045732	positive regulation of protein catabolic process	28/1382	192/17913	0.000818497	0.0075933	28	CLU/APOE/LRP1/NUPR1/CAV1/GJA1/SOX9/SH3D19/DAB2/PTK2/CD81/TNFSF12/RDX/PTTG1IP/MAGEF1/HSPA1A/PSMC3/SNX9/RACK1/SMAD7/NDUFA13/NOP53/HSP90AA1/STUB1/PSMC5/PSMC1/SUMO2/PSMC4
GO:0071897	DNA biosynthetic process	28/1382	192/17913	0.000818497	0.0075933	28	PDGFRB/GJA1/SMOC2/LOX/KLF4/BMPR2/HSP90AB1/MYC/CDKN1A/CTNNB1/SPHK1/CCT3/PHB/PTGES3/POLD2/CCT7/RPS27A/UBB/NHP2/HSP90AA1/CCT4/TCP1/PPIA/CCT6A/HNRNPA1/CCT2/CCT8/CCT5
GO:0071241	cellular response to inorganic substance	28/1382	194/17913	0.00096384	0.00863609	28	MT2A/MT1E/SERPINF1/MT1M/TF/MT1A/EGFR/BACE1/CLIC4/MT1X/APP/BNIP3/NFE2L1/SOD1/GSN/JUN/CAMK2D/BAD/AKR1C3/MEF2C/CALR/FOSB/MT1F/MEF2A/JUNB/HSPA5/FOS/FUS
GO:0034284	response to monosaccharide	28/1382	200/17913	0.0015426	0.0124872	28	SPARC/COL6A2/LGALS1/SERPINF1/LRP1/GAS6/GJA1/LPL/EFNA5/EGR1/SOX4/TCF7L2/THBS1/ZBTB20/PHPT1/BAD/GSTP1/HMGN3/FIS1/ANGPT2/NDUFAF2/RACK1/SRI/NME1/TXNIP/TXN2/JAGN1/EIF2B1
GO:0043583	ear development	28/1382	212/17913	0.00363355	0.0247446	28	SPARC/FRZB/FGFR1/PDGFRB/COL11A1/PRRX1/HES1/DLX5/BMP5/TWIST1/SOX9/ALDH1A3/HEY2/DLX6/SIX1/JAG1/MAFB/SDC4/CEBPD/AHI1/SOD1/CTHRC1/ITGA8/TRIP11/COL2A1/ZEB1/INSIG2/PRKRA
GO:0007584	response to nutrient	28/1382	215/17913	0.00442919	0.0286865	28	COL1A1/SPARC/TNC/VCAM1/BGLAP/MAP1B/GAS6/PTN/LPL/CCND1/SFRP1/SNAI2/TNFRSF11B/EGFR/KANK2/ALPL/SOD1/GSN/SPP1/DAD1/AKR1C3/MGMT/GSTP1/EEF2/IGFBP2/PKM/ERCC1/HSP90B1
GO:0043393	regulation of protein binding	28/1382	217/17913	0.00503714	0.0319172	28	APOE/LRP1/CRTAC1/ID1/CAV1/LOX/ANGPT1/NRP1/BAMBI/SMARCD3/DAB2/ANXA2/TCF7L2/APP/PHLDA2/PKD1/CTHRC1/HSP90AB1/PPP2CB/LGALS3/PARK7/MEF2C/LRPAP1/PLXND1/RAN/RPL11/STUB1/HSPA5
GO:0048872	homeostasis of number of cells	28/1382	241/17913	0.0194697	0.0876217	28	EPAS1/AXL/CSF1/RBFOX2/SOX9/KITLG/JAM3/MAFB/HSPA1B/THRA/PRDX1/NFE2L1/TMEM14C/SMAD5/SOD1/ZFP36L1/AKT3/MIF/HSPA1A/PRDX2/MEF2C/PRMT1/RPS19/VEGFA/INHBA/KLF2/ZFP36/RPS17
GO:0030100	regulation of endocytosis	28/1382	262/17913	0.0495433	0.168903	28	CLU/APOE/SFRP4/LRP1/GAS6/CAV1/MFGE8/CD151/TF/AXL/ANGPT1/EPHA3/DAB2/ANXA2/CD63/ITGAV/AHI1/CCL2/SOD1/WASL/LGALS3/MTMR2/CALR/LRPAP1/SPHK1/RACK1/ABL2/VEGFA
GO:1902105	regulation of leukocyte differentiation	28/1382	267/17913	0.060103	0.191714	28	BGLAP/FBN1/GAS6/MDK/SFRP1/AXL/MMP14/CSF1/KITLG/MAFB/TMEM176B/TMEM176A/SOD1/JUN/ZFP36L1/BAD/MYC/TOB2/PRDX2/CTNNB1/ZEB1/GNAS/SMAD7/KLF10/NME1/INHBA/PRELID1/FOS
GO:0005996	monosaccharide metabolic process	28/1382	277/17913	0.0858305	0.245476	28	IGFBP5/IGFBP4/LEPR/APOD/ENPP1/C1QTNF1/RBP4/PDK4/IGFBP3/PHLDA2/CYB5R3/NFE2L1/ATF3/BAD/IGF1/FAM3C/CYB5A/COX11/TPI1/MDH1/MDH2/PKM/GSTO1/PFKP/AKR1A1/PGAM1/NUDT5/ENO1
GO:0032496	response to lipopolysaccharide	28/1382	295/17913	0.148717	0.35994	28	DCN/SPARC/VCAM1/TFPI/GJA1/AXL/GNG12/SASH1/PLSCR4/PTGFR/TIMP4/AKAP12/ALPL/VIM/CCL2/COMT/GSTP1/MIF/PRDX2/MEF2C/CHMP5/ADH5/CAPN2/PRDX3/ATP2A2/HNRNPA0/FOS/ZFP36
GO:0071375	cellular response to peptide hormone stimulus	28/1382	297/17913	0.157036	0.371969	28	RARRES2/BGLAP/MAP1B/FBN1/CAV1/LPL/ERRFI1/ENPP1/FOXC2/CAV2/AGT/PDK4/GHR/PTK2/MYO1C/LEPROT/ADCY3/ZFP36L1/RAB13/ROCK2/NUCKS1/GSTP1/SHC1/AHCYL1/NR4A1/USO1/EIF4EBP1/APRT
GO:0046879	hormone secretion	28/1382	301/17913	0.174446	0.396472	28	CPE/SELENOM/LRP1/FGFR1/GJA1/C1QTNF1/SFRP1/RBP4/AGT/FOXD1/EGFR/EFNA5/LTBP4/SOX4/TCF7L2/SPP1/PHPT1/BAD/ARL2/PARK7/HMGN3/NDUFAF2/GNAS/SRI/SLC25A6/INHBA/JAGN1/SLC25A5
GO:0002237	response to molecule of bacterial origin	28/1382	309/17913	0.212226	0.442529	28	DCN/SPARC/VCAM1/TFPI/GJA1/AXL/GNG12/SASH1/PLSCR4/PTGFR/TIMP4/AKAP12/ALPL/VIM/CCL2/COMT/GSTP1/MIF/PRDX2/MEF2C/CHMP5/ADH5/CAPN2/PRDX3/ATP2A2/HNRNPA0/FOS/ZFP36
GO:0009914	hormone transport	28/1382	311/17913	0.222253	0.454567	28	CPE/SELENOM/LRP1/FGFR1/GJA1/C1QTNF1/SFRP1/RBP4/AGT/FOXD1/EGFR/EFNA5/LTBP4/SOX4/TCF7L2/SPP1/PHPT1/BAD/ARL2/PARK7/HMGN3/NDUFAF2/GNAS/SRI/SLC25A6/INHBA/JAGN1/SLC25A5
GO:1904062	regulation of cation transmembrane transport	28/1382	312/17913	0.227349	0.463285	28	CAV1/THY1/FXYD1/S100A1/FHL1/GEM/AGT/TWIST1/PLN/ANK2/CD63/APP/AHNAK/CCL2/RRAD/CAMK2D/YWHAE/SESTD1/PARK7/MEF2C/CHCHD10/SRI/CALM2/PHB2/ISCU/GSTO1/FLNA/AKAP9
GO:0050867	positive regulation of cell activation	28/1382	319/17913	0.264461	0.498826	28	LGALS1/VCAM1/PDGFRB/GAS6/CAV1/THY1/MDK/HES1/AXL/MMP14/PDPN/CD276/CD81/IL6ST/APP/THBS1/STXBP1/CCL2/NECTIN2/BAD/IGF1/CDKN1A/MIF/MEF2C/IGFBP2/YES1/HSPD1/RPS3
GO:0006869	lipid transport	28/1382	332/17913	0.338975	0.583907	28	CLU/APOE/PLA2G2A/SELENOM/APOD/LRP1/CAV1/C1QTNF1/RBP4/AGT/AKR1C1/PLA2R1/LIMA1/ANXA2/PLTP/ITGAV/THBS1/SCARB2/SPP1/NME4/HDLBP/MIF/ATP5PF/CES1/INHBA/PRELID1/APOL6/PLIN2
GO:0060271	cilium assembly	28/1382	335/17913	0.356954	0.59873	28	WWTR1/PARVA/FAM92A/CEP126/INTU/DYNC2H1/ARL3/AHI1/DYNLL1/GSN/IFT43/YWHAE/MAP4/DYNC1I2/IFT57/KIFAP3/TRIP11/TUBB/DCTN2/TUBA1A/ODF2L/HSP90AA1/DYNLRB1/FLNA/TUBB4B/AKAP9/VDAC3/ATXN10
GO:0007044	cell-substrate junction assembly	27/1382	96/17913	2.0579e-09	1.31445e-07	27	FN1/APOD/LRP1/THY1/CD151/FERMT2/SFRP1/MMP14/CTTN/LIMCH1/DLC1/NRP1/COL16A1/LAMC1/TRIP6/EPHA3/EFNA5/SDC4/PTK2/THBS1/GPM6B/S100A10/PHLDB2/ROCK2/PLEC/TNS1/VEGFA
GO:0030282	bone mineralization	27/1382	108/17913	3.28149e-08	1.59958e-06	27	COL1A2/MGP/IBSP/BGLAP/PTN/GJA1/DDR2/ASPN/PTH1R/ENPP1/OMD/FAM20C/LOX/TWIST1/TMEM119/SOX9/FGFR3/GPNMB/COMP/GPM6B/BMPR2/ANKH/IGF1/SBDS/MEF2C/ATRAID/KLF10
GO:0043618	regulation of transcription from RNA polymerase II promoter in response to stress	27/1382	109/17913	4.04522e-08	1.90502e-06	27	EPAS1/EGR1/BAG3/PSMB5/JUN/ATF3/HSPA1A/PSMC3/PSMB6/PSMB1/PSMD8/RPS27A/UBB/ELOC/VEGFA/PSMD2/PSMA3/PSMC5/PSMD3/PSMB7/PSMC1/KLF2/PSMA2/HSPA5/PSMA1/PSMC4/PSME2
GO:0043620	regulation of DNA-templated transcription in response to stress	27/1382	115/17913	1.33631e-07	5.19291e-06	27	EPAS1/EGR1/BAG3/PSMB5/JUN/ATF3/HSPA1A/PSMC3/PSMB6/PSMB1/PSMD8/RPS27A/UBB/ELOC/VEGFA/PSMD2/PSMA3/PSMC5/PSMD3/PSMB7/PSMC1/KLF2/PSMA2/HSPA5/PSMA1/PSMC4/PSME2
GO:0001704	formation of primary germ layer	27/1382	117/17913	1.94756e-07	7.31255e-06	27	FN1/COL6A1/FOXC1/COL5A2/FGFR1/COL11A1/MMP2/COL5A1/COL12A1/ITGB5/COL8A1/FOXC2/MMP14/COL4A2/LAMB1/ITGA7/TWSG1/ITGB1/ITGAV/KLF4/SNAI1/EXT2/BMPR2/ITGA8/CTNNB1/HSBP1/INHBA
GO:0006414	translational elongation	27/1382	124/17913	6.73744e-07	2.13943e-05	27	DIO2/GADD45GIP1/MRPL32/MRPS26/MRPL18/MRPL34/MRPL43/MRPL27/MRPL40/MRPS21/EEF2/RACK1/EEF1A1/MRPL17/TUFM/EIF5A/MRPL36/MRPL33/MRPL41/MRPS36/MRPL20/MRPL14/MRPS6/MRPS15/MRPL11/EEF1B2/MRPL3
GO:0090263	positive regulation of canonical Wnt signaling pathway	27/1382	135/17913	3.82178e-06	9.31475e-05	27	COL1A1/SFRP4/CAV1/DLX5/SFRP1/YAP1/ADGRA2/DAAM2/BAMBI/EGFR/SOX4/PSMB5/ILK/PSMC3/PSMB6/PSMB1/PSMD8/PSMD2/PSMA3/PSMC5/PSMD3/PSMB7/PSMC1/PSMA2/PSMA1/PSMC4/PSME2
GO:0071774	response to fibroblast growth factor	27/1382	145/17913	1.52567e-05	0.000290347	27	COL1A1/TNC/FGFR1/FGF7/FAM20C/SFRP1/SULF1/SMOC2/RBFOX2/FLRT2/FGFR3/GPC1/SPRED1/RUNX2/THBS1/CCL2/ZFP36L1/POLR2F/CTNNB1/POLR2H/NR4A1/POLR2E/POLR2I/POLR2L/HNRNPA1/POLR2K/ZFP36
GO:0030856	regulation of epithelial cell differentiation	27/1382	151/17913	3.24362e-05	0.000520947	27	SFRP4/FOXC1/FRZB/ID1/CAV1/CDKN1C/HES1/ERRFI1/CTSK/CCND1/CTSL/WWTR1/YAP1/SOX9/HEY2/JAG1/S1PR3/AHI1/CD109/ZFP36L1/ROCK2/TNFRSF1A/BAD/CTNNB1/ZEB1/RHEB/ZFP36
GO:0055001	muscle cell development	27/1382	159/17913	8.19536e-05	0.00115882	27	TPM1/LMNA/PDGFRB/PDGFRA/HES1/SGCB/SORBS2/CAV2/LOX/AGT/HEY2/ANK2/SHOX2/COMP/ITGB1/MYOF/ENG/PDLIM5/MYH11/MYH10/CFL2/IGF1/MEF2C/MEF2A/ATP2A2/VEGFA/ACTG1
GO:0046661	male sex differentiation	27/1382	160/17913	9.14807e-05	0.00126773	27	PDGFRB/NUPR1/PDGFRA/GJA1/RHOBTB3/CCND1/SFRP1/BMP5/MMP14/SOX9/KITLG/HOXA10/CST3/PRDX4/ARID5B/SMAD5/YBX3/RAB13/CTNNA1/AKR1C3/CTNNB1/FKBP4/UBB/ERCC1/INHBA/FLNA/EIF2S2
GO:2001242	regulation of intrinsic apoptotic signaling pathway	27/1382	163/17913	0.000126298	0.00169117	27	CLU/CXCL12/NUPR1/CAV1/ACKR3/SNAI2/HSPB1/SNAI1/SOD1/YBX3/BAD/PTTG1IP/MIF/PARK7/HSPA1A/FIS1/RACK1/VDAC2/RPL11/PRKRA/UBB/NDUFA13/RPL26/RPS3/DNAJA1/P4HB/ENO1
GO:0071248	cellular response to metal ion	27/1382	167/17913	0.000190945	0.00240609	27	MT2A/MT1E/SERPINF1/MT1M/TF/MT1A/EGFR/BACE1/CLIC4/MT1X/APP/BNIP3/NFE2L1/SOD1/GSN/JUN/CAMK2D/AKR1C3/MEF2C/CALR/FOSB/MT1F/MEF2A/JUNB/HSPA5/FOS/FUS
GO:0048660	regulation of smooth muscle cell proliferation	27/1382	172/17913	0.000312085	0.00353209	27	IGFBP5/TPM1/APOD/PDGFRB/MMP2/ADAMTS1/OGN/NOTCH3/AGT/NDRG2/PRKG1/EGFR/IGFBP3/TCF7L2/ANG/THBS1/KLF4/PDGFD/COMT/JUN/ILK/IGF1/CDKN1A/GSTP1/MEF2C/CTNNB1/TGM2
GO:0010634	positive regulation of epithelial cell migration	27/1382	173/17913	0.000343194	0.00379906	27	SPARC/FGFR1/FGF7/PLPP3/NRP2/FOXC2/SMOC2/AGT/ANGPT1/NRP1/SOX9/SASH1/ADGRA2/ENPP2/DOCK1/RHOB/HSPB1/AMOTL1/THBS1/JUN/ROCK2/BMPR2/AKT3/CALR/AAMP/VEGFA/ATP5F1B
GO:0048659	smooth muscle cell proliferation	27/1382	174/17913	0.000377008	0.00408662	27	IGFBP5/TPM1/APOD/PDGFRB/MMP2/ADAMTS1/OGN/NOTCH3/AGT/NDRG2/PRKG1/EGFR/IGFBP3/TCF7L2/ANG/THBS1/KLF4/PDGFD/COMT/JUN/ILK/IGF1/CDKN1A/GSTP1/MEF2C/CTNNB1/TGM2
GO:0021953	central nervous system neuron differentiation	27/1382	177/17913	0.000496721	0.0050005	27	ID4/CDH11/HES1/NTRK2/DLX5/NRP2/SFRP1/SLIT2/NFIB/SATB2/NRP1/DYNC2H1/DCLK1/PTK2/SOX4/TULP3/C12orf57/NFE2L1/HSP90AB1/LMO4/ADARB1/RYK/CTNNB1/UBB/UQCRQ/HSP90AA1/INHBA
GO:0038061	NIK/NF-kappaB signaling	27/1382	179/17913	0.000593996	0.00578475	27	UACA/SASH1/TRIP6/EGFR/PSMB5/APP/PRDX1/ILK/COPS8/CALR/PSMC3/PSMB6/SPHK1/PSMB1/SKP1/PSMD8/PSMD2/RPS3/PSMA3/PSMC5/PSMD3/PSMB7/PSMC1/PSMA2/PSMA1/PSMC4/PSME2
GO:0050920	regulation of chemotaxis	27/1382	186/17913	0.00107801	0.0094487	27	CXCL12/RARRES2/FGFR1/PDGFRB/GAS6/PTN/PDGFRA/MDK/NBL1/SMOC2/SLIT2/CSF1/NRP1/ADGRA2/JAM3/HSPB1/THBS1/CCL2/PDGFD/BMPR2/RYK/GSTP1/MIF/CALR/ANGPT2/C1QBP/VEGFA
GO:0009156	ribonucleoside monophosphate biosynthetic process	27/1382	188/17913	0.00126771	0.0108213	27	NUPR1/AK1/ZBTB20/IGF1/ATP5MC3/ATP5PF/LDHA/ADK/TPI1/STOML2/ATP5MC1/EIF6/PKM/ATP5F1C/CMPK1/IMPDH2/UQCC3/PFKP/PGAM1/ATP5PO/ATP5F1D/ATP5F1B/ATP5MF/ATP5ME/DDIT4/ENO1/APRT
GO:0044272	sulfur compound biosynthetic process	27/1382	190/17913	0.00148562	0.01215	27	DCN/LUM/BGN/PRELP/FMOD/GGT5/ACAN/OGN/CDO1/OMD/PDK4/ANGPT1/GSTM3/CSPG4/DSEL/CHST3/UGDH/VCAN/MGST3/ESD/PAPSS2/GSTP1/ADI1/PAPSS1/GSTO1/MPC1/AKR1A1
GO:0009124	nucleoside monophosphate biosynthetic process	27/1382	196/17913	0.00234344	0.0175033	27	NUPR1/AK1/ZBTB20/IGF1/ATP5MC3/ATP5PF/LDHA/ADK/TPI1/STOML2/ATP5MC1/EIF6/PKM/ATP5F1C/CMPK1/IMPDH2/UQCC3/PFKP/PGAM1/ATP5PO/ATP5F1D/ATP5F1B/ATP5MF/ATP5ME/DDIT4/ENO1/APRT
GO:1901215	negative regulation of neuron death	27/1382	207/17913	0.00502517	0.0318777	27	APOE/SERPINF1/LRP1/MDK/CHL1/NTRK2/AXL/CSF1/ANGPT1/UNC5B/NRP1/NDNF/SIX1/GPNMB/STXBP1/RETREG1/CCL2/SOD1/JUN/HSP90AB1/ILK/PARK7/MEF2C/CTNNB1/RACK1/PSMC1/SET
GO:0022618	ribonucleoprotein complex assembly	27/1382	209/17913	0.00571868	0.0349601	27	HSP90AB1/RPL5/SBDS/NPM1/NBDY/CIRBP/RPS23/RPL11/PTGES3/EIF6/DDX1/NOP53/EIF3I/RPS19/HSP90AA1/SNRPE/C1QBP/EIF3G/SNRPD1/SNRPF/SNRPD2/RPL13A/EIF2A/SNU13/EIF3B/EIF3D/TXNL4A
GO:0031669	cellular response to nutrient levels	27/1382	220/17913	0.0111036	0.0579184	27	COL1A1/TNC/BGLAP/GAS6/PTN/LPL/SFRP1/PDK4/SNAI2/KANK2/COMT/SOD1/JUN/ATF3/BMPR2/AKR1C3/CDKN1A/RRAGA/DAP/DNAJC15/IFI16/KLF10/HSPA8/HNRNPA1/TXN2/HSPA5/HSP90B1
GO:0071826	ribonucleoprotein complex subunit organization	27/1382	221/17913	0.0117494	0.060343	27	HSP90AB1/RPL5/SBDS/NPM1/NBDY/CIRBP/RPS23/RPL11/PTGES3/EIF6/DDX1/NOP53/EIF3I/RPS19/HSP90AA1/SNRPE/C1QBP/EIF3G/SNRPD1/SNRPF/SNRPD2/RPL13A/EIF2A/SNU13/EIF3B/EIF3D/TXNL4A
GO:0006469	negative regulation of protein kinase activity	27/1382	222/17913	0.0124251	0.0631039	27	APOE/CAV1/THY1/CDKN1C/NR2F2/ERRFI1/RGS3/SFRP1/WWTR1/CAMK2N1/GPRC5A/SPRED1/HSPB1/SOCS3/GADD45B/ILK/DUSP14/ADARB1/CDKN1A/GSTP1/PARK7/NPM1/RACK1/HEXIM1/RTRAF/DNAJA1/GADD45A
GO:0051054	positive regulation of DNA metabolic process	27/1382	222/17913	0.0124251	0.0631039	27	FGFR1/PDGFRB/SMOC2/EGFR/CST3/KLF4/JUN/HSP90AB1/MYC/MGMT/CTNNB1/CCT3/PTGES3/CCT7/STOML2/HSP90AA1/ERCC1/MPHOSPH8/CCT4/TCP1/RPS3/CCT6A/HNRNPA1/CCT2/CCT8/FUS/CCT5
GO:1903320	regulation of protein modification by small protein conjugation or removal	27/1382	223/17913	0.013132	0.0654478	27	CAV1/ANGPT1/SASH1/EGR1/SOX4/HSPA1B/HSP90AB1/PTTG1IP/RPL5/PARK7/HSPA1A/CTNNB1/NDFIP1/SPHK1/CAMLG/SMAD7/RPS2/RPL11/UBB/NOP53/HSP90AA1/STUB1/RPS3/DNAJA1/CENPX/HSPA5/UBXN1
GO:0050851	antigen receptor-mediated signaling pathway	27/1382	224/17913	0.0138708	0.0685155	27	THY1/CD81/PAWR/PSMB5/NECTIN2/PHPT1/LGALS3/MEF2C/PSMC3/PSMB6/PSMB1/SKP1/PSMD8/STOML2/PSMD2/RPS3/RFTN1/PSMA3/PSMC5/PSMD3/PSMB7/PSMC1/PSMA2/PSMA1/EIF2B1/PSMC4/PSME2
GO:1904018	positive regulation of vasculature development	27/1382	232/17913	0.0210537	0.0932979	27	ANGPTL4/CYP1B1/MDK/S100A1/RRAS/FOXC2/SMOC2/TWIST1/NRP1/SASH1/HSPB6/PTGIS/RHOB/HSPB1/EGR1/ITGB1/THBS1/ENG/KLF4/PDGFD/TNFSF12/AKT3/MYDGF/ANGPT2/SPHK1/PKM/VEGFA
GO:0045165	cell fate commitment	27/1382	238/17913	0.0281404	0.115529	27	FGFR1/EPAS1/PRRX1/HES1/NR2F2/NOTCH3/SFRP1/FOXC2/TGFB1I1/PDPN/GAS1/SATB2/NRP1/SOX9/TBX2/HEY2/SIX1/JAG1/RUNX2/TCF7L2/ITGB1/KLF4/NFE2L1/SMAD5/LMO4/MEF2C/CTNNB1
GO:0021700	developmental maturation	27/1382	262/17913	0.0755324	0.223739	27	FGFR1/MAP1B/EPAS1/MMP2/CDKN1C/HES1/GJA1/PTH1R/FAM20C/AXL/LGI4/GLDN/FGFR3/NTN4/NFIA/RUNX2/CD63/ANG/APP/STXBP1/IGF1/CDKN1A/CTNNB1/MTCH1/CLSTN1/VEGFA/KLF2
GO:0072331	signal transduction by p53 class mediator	27/1382	264/17913	0.0810899	0.236544	27	NUPR1/TWIST1/MYO6/SNAI2/PHLDA3/PLA2R1/SPRED1/SOX4/NDRG1/SNAI1/PTTG1IP/RPL5/CDKN1A/HIC1/MIF/PRMT1/RPS27L/IFI16/RPL11/HEXIM1/UBB/NOP53/RPL26/RPF2/GADD45A/DDIT4/HINT1
GO:0070646	protein modification by small protein removal	27/1382	273/17913	0.109489	0.288622	27	OTUD7B/PSMB5/MYC/PARK7/COPS8/COPS6/PSMC3/PSMB6/PSMB1/SMAD7/PSMD8/RPS27A/UBB/NOP53/NEDD8/PSMD2/TOMM20/PSMA3/PSMC5/PSMD3/PSMB7/PSMC1/PSMA2/UBXN1/PSMA1/PSMC4/PSME2
GO:0010506	regulation of autophagy	27/1382	314/17913	0.305936	0.547003	27	DCN/LEPR/NUPR1/CTTN/HSPB1/FEZ1/DEPP1/PTK2/BAG3/BNIP3/BAD/RRAGA/PARK7/TMEM59/TRIM8/DAP/SCOC/IFI16/EEF1A1/ABL2/VDAC1/RHEB/OPTN/SNRNP70/RNF5/ATG101/TOMM7
GO:0045787	positive regulation of cell cycle	27/1382	373/17913	0.664569	0.840869	27	FGFR1/PDGFRB/HES1/ADAMTS1/CCND1/SMOC2/FAP/EGFR/SMARCD3/SOX4/PBX1/APP/PKD1/ROCK2/HSP90AB1/IGF1/RDX/CDKN1A/MIF/NPM1/CALR/PRMT1/SPHK1/PHB2/RPL26/GADD45A/EIF4EBP1
GO:1903532	positive regulation of secretion by cell	27/1382	381/17913	0.706605	0.862042	27	CXCL12/LRP1/FGFR1/MDK/GJA1/LPL/C1QTNF1/RBP4/AGT/TWIST1/EGFR/AKAP12/CADM1/SDC4/SOX4/TCF7L2/ANG/STXBP1/MYH10/SPP1/PHPT1/BAD/IGF1/MIF/SRI/INHBA/PPIA
GO:0006644	phospholipid metabolic process	27/1382	402/17913	0.801473	0.910884	27	PLA2G2A/PDGFRB/PDGFRA/LPL/PTPN13/ENPP2/PDGFA/FGFR3/PLEKHA4/PTK2/CD81/SOCS3/ISYNA1/KLF4/GPX4/DBI/MTMR2/PRDX6/CAPN2/HADHB/DPM3/PIGP/STOML2/HEXB/PYURF/HADHA/FDPS
GO:1901888	regulation of cell junction assembly	26/1382	90/17913	2.17076e-09	1.35539e-07	26	APOD/LRP1/CAV1/THY1/GJA1/SFRP1/MMP14/AGT/LIMCH1/DLC1/TJP1/NRP1/SNAI2/COL16A1/EPHA3/EFNA5/SDC4/PTK2/THBS1/MYO1C/GPM6B/S100A10/SNAI1/PHLDB2/ROCK2/VEGFA
GO:0010811	positive regulation of cell-substrate adhesion	26/1382	110/17913	1.96908e-07	7.34373e-06	26	FN1/CCDC80/EMP2/PTN/THY1/MDK/EDIL3/COL8A1/SFRP1/ABI3BP/SMOC2/CSF1/NRP1/COL16A1/NDNF/NPNT/DOCK1/NID1/SDC4/S100A10/ILK/ARL2/CALR/C1QBP/VEGFA/FLNA
GO:0003206	cardiac chamber morphogenesis	26/1382	129/17913	4.95027e-06	0.000115099	26	TPM1/CPE/FOXC1/COL11A1/HES1/ADAMTS1/NRP2/FOXC2/BMP5/RBP4/SLIT2/SLIT3/PARVA/NRP1/TBX2/HEY2/SHOX2/JAG1/SMARCD3/SOX4/SAV1/ENG/BMPR2/DHRS3/MEF2C/SMAD7
GO:0044344	cellular response to fibroblast growth factor stimulus	26/1382	138/17913	1.75808e-05	0.000323498	26	COL1A1/FGFR1/FGF7/FAM20C/SFRP1/SULF1/SMOC2/RBFOX2/FLRT2/FGFR3/GPC1/SPRED1/RUNX2/THBS1/CCL2/ZFP36L1/POLR2F/CTNNB1/POLR2H/NR4A1/POLR2E/POLR2I/POLR2L/HNRNPA1/POLR2K/ZFP36
GO:0042542	response to hydrogen peroxide	26/1382	144/17913	3.79327e-05	0.000597144	26	COL1A1/CRYAB/CYP1B1/PDGFRB/AXL/RHOB/CST3/PAWR/KLF4/BNIP3/PDGFD/SOD1/NET1/JUN/PPP2CB/BAD/PARK7/SPHK1/CAPN2/EEF2/RACK1/STK25/PRDX3/RPS3/KLF2/TXNIP
GO:0071236	cellular response to antibiotic	26/1382	147/17913	5.45798e-05	0.000824185	26	CLU/ID3/CYP1B1/AXL/EFNA5/RHOB/CST3/EGR1/PAWR/KLF4/BNIP3/ADCY3/PDGFD/NET1/CRIP1/PARK7/MEF2C/SPHK1/RACK1/STK25/RPS3/HNRNPA1/KLF2/JAGN1/HSPA5/AHR
GO:0002244	hematopoietic progenitor cell differentiation	26/1382	158/17913	0.000186294	0.00235817	26	FOXC1/HES1/SFRP1/YAP1/KITLG/JAM3/FST/SOX4/PSMB5/CEBPD/PSMC3/PSMB6/PSMB1/EEF2/PSMD8/INHBA/PSMD2/PSMA3/PSMC5/PSMD3/PSMB7/PSMC1/PSMA2/PSMA1/PSMC4/PSME2
GO:0009408	response to heat	26/1382	158/17913	0.000186294	0.00235817	26	CXCL12/IGFBP7/CRYAB/TGFB1I1/SCARA5/HSPA1B/BAG3/THBS1/MYOF/SOD1/CAMK2D/YWHAE/HSP90AB1/DNAJB4/IGF1/CDKN1A/HSPA1A/PTGES3/FKBP4/HSBP1/ATP2A2/HSP90AA1/STUB1/HSPA8/DNAJA1/EIF2B1
GO:0009145	purine nucleoside triphosphate biosynthetic process	26/1382	160/17913	0.000229046	0.00272908	26	NUPR1/NME3/ZBTB20/NME4/IGF1/ATP5MC3/ATP5PF/LDHA/ADK/TPI1/STOML2/ATP5MC1/NME1/EIF6/PKM/ATP5F1C/UQCC3/PFKP/PGAM1/ATP5PO/ATP5F1D/ATP5F1B/ATP5MF/ATP5ME/DDIT4/ENO1
GO:0050680	negative regulation of epithelial cell proliferation	26/1382	163/17913	0.000309494	0.00350992	26	APOE/SPARC/SERPINF1/NUPR1/CAV1/PTN/CDKN1C/NR2F2/GJA1/SFRP1/SULF1/CAV2/NFIB/SNAI2/SOX9/NGFR/INTU/KLF9/SAV1/THBS1/CCL2/MAGED1/CD109/IFT57/MEF2C/PHB2
GO:0030308	negative regulation of cell growth	26/1382	167/17913	0.000455042	0.00465685	26	CRYAB/SERPINE2/FRZB/GJA1/ENPP1/FHL1/SFRP1/SLIT2/AGT/SLIT3/NRP1/RERG/MEG3/HSPA1B/APBB2/BMPR2/SPP1/RYK/CDKN1A/HSPA1A/EI24/RACK1/PHB/NDUFA13/INHBA/ENO1
GO:0061136	regulation of proteasomal protein catabolic process	26/1382	167/17913	0.000455042	0.00465685	26	CLU/APOE/NUPR1/CAV1/MAP1A/DAB2/PKD1/NFE2L1/HSP90AB1/PARK7/HSPA1A/PSMC3/ERLEC1/RACK1/CAMLG/SMAD7/RPL11/OS9/UBB/NOP53/STUB1/PSMC5/PSMC1/UBXN1/SUMO2/PSMC4
GO:0009127	purine nucleoside monophosphate biosynthetic process	26/1382	174/17913	0.000857346	0.00782311	26	NUPR1/AK1/ZBTB20/IGF1/ATP5MC3/ATP5PF/LDHA/ADK/TPI1/STOML2/ATP5MC1/EIF6/PKM/ATP5F1C/IMPDH2/UQCC3/PFKP/PGAM1/ATP5PO/ATP5F1D/ATP5F1B/ATP5MF/ATP5ME/DDIT4/ENO1/APRT
GO:0009168	purine ribonucleoside monophosphate biosynthetic process	26/1382	174/17913	0.000857346	0.00782311	26	NUPR1/AK1/ZBTB20/IGF1/ATP5MC3/ATP5PF/LDHA/ADK/TPI1/STOML2/ATP5MC1/EIF6/PKM/ATP5F1C/IMPDH2/UQCC3/PFKP/PGAM1/ATP5PO/ATP5F1D/ATP5F1B/ATP5MF/ATP5ME/DDIT4/ENO1/APRT
GO:0010821	regulation of mitochondrion organization	26/1382	175/17913	0.000934757	0.00844625	26	DCN/CLU/LMNA/CTTN/BAG3/LEPROT/BNIP3/YWHAE/BAD/IGF1/YWHAQ/PDCD5/PARK7/HSPA1A/FAM162A/LMAN1/FIS1/CHCHD10/ACAA2/VDAC1/OPTN/STOML2/SQSTM1/PRELID1/TOMM7/SLC25A5
GO:0007219	Notch signaling pathway	26/1382	179/17913	0.00130826	0.0111162	26	FOXC1/MDK/HES1/NOTCH3/GMDS/FOXC2/MMP14/PLN/SNAI2/SOX9/TBX2/TIMP4/HEY2/EGFR/JAG1/S1PR3/IL6ST/PBX1/APP/EPN2/SNAI1/MAML2/MYC/PLXND1/ERH/YBX1
GO:0043902	positive regulation of multi-organism process	26/1382	180/17913	0.00141962	0.0116872	26	APOE/LGALS1/CAV2/SASH1/SYDE1/PDE5A/JUN/HACD3/NUCKS1/PPIB/BAD/ADARB1/MIF/POLR2F/POLR2H/POLR2E/MDFIC/OPTN/POLR2I/C1QBP/INHBA/PPIA/HSPA8/P4HB/POLR2L/POLR2K
GO:0050852	T cell receptor signaling pathway	26/1382	180/17913	0.00141962	0.0116872	26	THY1/CD81/PAWR/PSMB5/NECTIN2/PHPT1/LGALS3/PSMC3/PSMB6/PSMB1/SKP1/PSMD8/STOML2/PSMD2/RPS3/RFTN1/PSMA3/PSMC5/PSMD3/PSMB7/PSMC1/PSMA2/PSMA1/EIF2B1/PSMC4/PSME2
GO:0009749	response to glucose	26/1382	190/17913	0.00306145	0.0215348	26	COL6A2/LGALS1/SERPINF1/LRP1/GAS6/GJA1/LPL/EFNA5/EGR1/SOX4/TCF7L2/THBS1/ZBTB20/PHPT1/BAD/HMGN3/FIS1/ANGPT2/NDUFAF2/RACK1/SRI/NME1/TXNIP/TXN2/JAGN1/EIF2B1
GO:2000377	regulation of reactive oxygen species metabolic process	26/1382	194/17913	0.00406758	0.0272331	26	CLU/CRYAB/CYP1B1/PDGFRB/CAV1/AGT/EGFR/PTGIS/THBS1/DDAH2/KLF4/BNIP3/SOD1/ROCK2/HSP90AB1/AKR1C3/CDKN1A/GSTP1/PARK7/PRDX2/VDAC1/ARF4/EIF6/HSP90AA1/KLF2/GADD45A
GO:0009746	response to hexose	26/1382	195/17913	0.00435852	0.0284276	26	COL6A2/LGALS1/SERPINF1/LRP1/GAS6/GJA1/LPL/EFNA5/EGR1/SOX4/TCF7L2/THBS1/ZBTB20/PHPT1/BAD/HMGN3/FIS1/ANGPT2/NDUFAF2/RACK1/SRI/NME1/TXNIP/TXN2/JAGN1/EIF2B1
GO:0045665	negative regulation of neuron differentiation	26/1382	201/17913	0.00649418	0.0387212	26	APOE/LGALS1/LRP1/ID1/THY1/HES1/PMP22/NOTCH3/SLIT2/IRX3/DPYSL3/NRP1/SOX9/NGFR/PTPRG/DIXDC1/JAG1/PTK2/PBX1/VIM/APP/SPP1/RYK/CALR/FKBP4/ITM2C
GO:0010466	negative regulation of peptidase activity	26/1382	223/17913	0.0227703	0.09901	26	TIMP1/CRYAB/COL6A3/TIMP3/GAS6/TFPI/BEX3/A2M/ITIH5/NGFR/CST3/CRIM1/APP/THBS1/PEBP1/KLF4/TIMP2/CD109/YWHAE/PARK7/IFI16/SERPINB6/PRDX3/VEGFA/IFI6/UBXN1
GO:0007018	microtubule-based movement	26/1382	224/17913	0.023939	0.101913	26	MAP1B/DST/TMEM108/DYNC2H1/MAP1A/HSPB1/FEZ1/BAG3/APP/ARL3/ARHGAP21/SOD1/DYNLL1/IFT43/PURA/MAP4/DPCD/DYNC1I2/SUN1/IFT57/KIFAP3/TRIP11/KIF1C/KTN1/UBB/DYNLRB1
GO:0007050	cell cycle arrest	26/1382	231/17913	0.0334677	0.129965	26	GAS6/CDKN1C/ZFHX3/CCND1/GAS1/FAP/SOX4/TCF7L2/THBS1/APBB2/PKD1/HSP90AB1/ILK/MAP3K20/MYC/CDKN1A/GADD45GIP1/RRAGA/MIF/CALR/PRMT1/RHEB/RPL26/INHBA/PPP1R15A/GADD45A
GO:0032943	mononuclear cell proliferation	26/1382	246/17913	0.0631372	0.196881	26	VCAM1/HES1/GJA1/CD151/CSF1/PDE5A/CD276/GPNMB/TWSG1/SDC4/CD81/IL6ST/PAWR/PURA/IGF1/CDKN1A/LGALS3/MIF/PRDX2/MEF2C/CTNNB1/IGFBP2/HSPD1/IMPDH2/RPS3/AHR
GO:0007249	I-kappaB kinase/NF-kappaB signaling	26/1382	253/17913	0.0819602	0.238207	26	LGALS1/S100A13/RHOC/GJA1/ANGPT1/HSPB1/OTUD7B/LTBR/PRDX4/S100B/ROCK2/HACD3/TNFRSF1A/GSTP1/CTNNB1/NDFIP1/TFG/TRIM8/CXXC5/OPTN/RPS27A/SQSTM1/UBB/DDX1/TGM2/FLNA
GO:0045927	positive regulation of growth	26/1382	266/17913	0.126178	0.317847	26	FN1/CXCL12/LRP1/FGFR1/MAP1B/SFRP1/MMP14/CSF1/NRP1/YAP1/TBX2/GHR/HEY2/EGFR/EFNA5/TNFRSF12A/YBX3/BMPR2/ILK/PPIB/IGF1/MEF2C/SPHK1/VEGFA/RFTN1/DNPH1
GO:0050890	cognition	26/1382	286/17913	0.21763	0.447418	26	APOE/SERPINF1/PTN/MDK/CHL1/NTRK2/AGT/SYNPO/TUSC3/EGFR/NRXN2/MAP1A/ITGB1/C12orf57/S100B/APP/THRA/ADCY3/COMT/JUN/ITGA8/MEF2C/VDAC1/ARF4/VDAC3/FOS
GO:1903037	regulation of leukocyte cell-cell adhesion	26/1382	295/17913	0.266961	0.501183	26	CXCL12/LGALS1/VCAM1/CAV1/THY1/MDK/HES1/PDE5A/CD276/GPNMB/TWSG1/SDC4/CD81/IL6ST/PAWR/KLF4/CCL2/BAD/IGF1/LGALS3/PRDX2/SMAD7/IGFBP2/YES1/HSPD1/RPS3
GO:0002696	positive regulation of leukocyte activation	26/1382	305/17913	0.326303	0.565588	26	LGALS1/VCAM1/GAS6/CAV1/THY1/MDK/HES1/AXL/MMP14/CD276/CD81/IL6ST/APP/THBS1/STXBP1/CCL2/NECTIN2/BAD/IGF1/CDKN1A/MIF/MEF2C/IGFBP2/YES1/HSPD1/RPS3
GO:0030098	lymphocyte differentiation	26/1382	325/17913	0.453155	0.700272	26	LGALS1/LEPR/VCAM1/GAS6/MDK/SFRP1/TMEM98/AXL/MMP14/FZD8/MAFB/RUNX2/EGR1/SOX4/ITGB1/SOD1/ZFP36L1/BAD/KDELR1/PRDX2/CTNNB1/ZEB1/SMAD7/INHBA/PRELID1/RPL22
GO:0010257	NADH dehydrogenase complex assembly	25/1382	64/17913	2.61866e-12	2.59856e-10	25	NDUFS4/DMAC1/NDUFC2/NDUFB4/TIMMDC1/NDUFAF2/NDUFB7/NDUFC1/NDUFB2/NDUFAF3/NDUFA8/NDUFA5/NDUFS5/NDUFAB1/NDUFA12/NDUFB10/NDUFA13/NDUFB5/NDUFV2/NDUFB6/NDUFB8/NDUFA6/NDUFA11/NDUFB3/NDUFAF8
GO:0032981	mitochondrial respiratory chain complex I assembly	25/1382	64/17913	2.61866e-12	2.59856e-10	25	NDUFS4/DMAC1/NDUFC2/NDUFB4/TIMMDC1/NDUFAF2/NDUFB7/NDUFC1/NDUFB2/NDUFAF3/NDUFA8/NDUFA5/NDUFS5/NDUFAB1/NDUFA12/NDUFB10/NDUFA13/NDUFB5/NDUFV2/NDUFB6/NDUFB8/NDUFA6/NDUFA11/NDUFB3/NDUFAF8
GO:0034333	adherens junction assembly	25/1382	90/17913	1.06756e-08	5.81608e-07	25	APOD/LRP1/THY1/FERMT2/SFRP1/MMP14/CTTN/LIMCH1/DLC1/NRP1/COL16A1/TRIP6/EPHA3/ZNF703/EFNA5/SDC4/PTK2/THBS1/GPM6B/S100A10/PHLDB2/ROCK2/CTNNB1/SMAD7/VEGFA
GO:2000736	regulation of stem cell differentiation	25/1382	116/17913	2.10702e-06	5.65638e-05	25	FOXC1/PTN/PDGFRA/HES1/LTBP3/YAP1/SOX9/JAG1/PSMB5/PSMC3/PSMB6/PSMB1/PSMD8/OCIAD1/PSMD2/PSMA3/LBH/PSMC5/PSMD3/PSMB7/PSMC1/PSMA2/PSMA1/PSMC4/PSME2
GO:0090101	negative regulation of transmembrane receptor protein serine/threonine kinase signaling pathway	25/1382	121/17913	4.70987e-06	0.00010997	25	HTRA1/FBN1/CAV1/PMEPA1/NBL1/EMILIN1/ASPN/LTBP1/VASN/SFRP1/CAV2/TGFB1I1/CHRDL1/BAMBI/FST/TWSG1/CD109/HSPA1A/SMAD7/RPS27A/UBB/TOB1/STUB1/FAM89B/HSPA5
GO:0008360	regulation of cell shape	25/1382	124/17913	7.43735e-06	0.000157746	25	FN1/TPM1/S100A13/PTN/EPS8/FERMT2/PDPN/CDC42EP5/PARVA/DLC1/CDC42EP4/CDC42EP1/BAMBI/WASF3/FBLIM1/ITGA7/PTK2/MYO10/S100B/CCL2/PLXNB2/MYH10/RDX/VEGFA/HEXB
GO:0009308	amine metabolic process	25/1382	128/17913	1.32996e-05	0.000257511	25	VCAM1/HNMT/ALDH7A1/AOC3/PSMB5/COMT/SAT2/PARK7/PNKD/PSMC3/PSMB6/PSMB1/PSMD8/SRM/PSMD2/PSMA3/PSMC5/PSMD3/PSMB7/DHPS/PSMC1/PSMA2/PSMA1/PSMC4/PSME2
GO:0032355	response to estradiol	25/1382	128/17913	1.32996e-05	0.000257511	25	COL1A1/CRYAB/MAP1B/PDGFRB/PTN/TFPI/NR2F2/GJA1/CCND1/SFRP1/AGT/PTGFR/EGFR/ZNF703/CST3/PAM/STXBP1/BAD/GPX4/GSTP1/CALR/CTNNB1/EEF2/IGFBP2/TXNIP
GO:0030260	entry into host cell	25/1382	134/17913	3.0089e-05	0.000490417	25	IFITM3/LGALS1/GAS6/CAV1/NCAM1/ITGB5/AXL/CAV2/EGFR/CD81/HSPA1B/ITGB1/ITGAV/SCARB2/GSN/NECTIN2/CTNND1/HSPA1A/CTNNB1/TRIM8/CTSB/SIVA1/IFITM1/PPIA/P4HB
GO:0044409	entry into host	25/1382	134/17913	3.0089e-05	0.000490417	25	IFITM3/LGALS1/GAS6/CAV1/NCAM1/ITGB5/AXL/CAV2/EGFR/CD81/HSPA1B/ITGB1/ITGAV/SCARB2/GSN/NECTIN2/CTNND1/HSPA1A/CTNNB1/TRIM8/CTSB/SIVA1/IFITM1/PPIA/P4HB
GO:0051806	entry into cell of other organism involved in symbiotic interaction	25/1382	134/17913	3.0089e-05	0.000490417	25	IFITM3/LGALS1/GAS6/CAV1/NCAM1/ITGB5/AXL/CAV2/EGFR/CD81/HSPA1B/ITGB1/ITGAV/SCARB2/GSN/NECTIN2/CTNND1/HSPA1A/CTNNB1/TRIM8/CTSB/SIVA1/IFITM1/PPIA/P4HB
GO:0051828	entry into other organism involved in symbiotic interaction	25/1382	134/17913	3.0089e-05	0.000490417	25	IFITM3/LGALS1/GAS6/CAV1/NCAM1/ITGB5/AXL/CAV2/EGFR/CD81/HSPA1B/ITGB1/ITGAV/SCARB2/GSN/NECTIN2/CTNND1/HSPA1A/CTNNB1/TRIM8/CTSB/SIVA1/IFITM1/PPIA/P4HB
GO:0001837	epithelial to mesenchymal transition	25/1382	140/17913	6.40653e-05	0.000941827	25	COL1A1/FOXC1/MDK/VASN/SFRP1/BMP5/TGFB1I1/PDPN/WWTR1/TWIST1/SNAI2/SOX9/BAMBI/EPHA3/HEY2/ZNF703/JAG1/PHLDB1/DAB2/ENG/SNAI1/PHLDB2/SPRY1/CTNNB1/SMAD7
GO:0071772	response to BMP	25/1382	147/17913	0.00014438	0.00191028	25	SFRP4/HTRA1/FBN1/ID1/FSTL1/HES1/NBL1/DLX5/SFRP1/SULF1/SOX9/CHRDL1/NEO1/FOXD1/TWSG1/RUNX2/EGR1/COMP/ENG/SMAD5/BMPR2/ILK/COL2A1/SMAD7/TOB1
GO:0071773	cellular response to BMP stimulus	25/1382	147/17913	0.00014438	0.00191028	25	SFRP4/HTRA1/FBN1/ID1/FSTL1/HES1/NBL1/DLX5/SFRP1/SULF1/SOX9/CHRDL1/NEO1/FOXD1/TWSG1/RUNX2/EGR1/COMP/ENG/SMAD5/BMPR2/ILK/COL2A1/SMAD7/TOB1
GO:0009206	purine ribonucleoside triphosphate biosynthetic process	25/1382	159/17913	0.000499161	0.00501223	25	NUPR1/NME3/ZBTB20/NME4/IGF1/ATP5MC3/ATP5PF/LDHA/TPI1/STOML2/ATP5MC1/NME1/EIF6/PKM/ATP5F1C/UQCC3/PFKP/PGAM1/ATP5PO/ATP5F1D/ATP5F1B/ATP5MF/ATP5ME/DDIT4/ENO1
GO:0006937	regulation of muscle contraction	25/1382	164/17913	0.000795738	0.00745588	25	MYL9/TPM1/CAV1/CTTN/PLN/SSTR2/PRKG1/NPNT/HSPB6/PDE5A/ANK2/C12orf57/SOD1/CAMK2D/GUCY1A1/SPHK1/SMAD7/SRI/CALM2/ATP2A2/GSTO1/ATP1A1/FLNA/AKAP9/ENO1
GO:0009201	ribonucleoside triphosphate biosynthetic process	25/1382	164/17913	0.000795738	0.00745588	25	NUPR1/NME3/ZBTB20/NME4/IGF1/ATP5MC3/ATP5PF/LDHA/TPI1/STOML2/ATP5MC1/NME1/EIF6/PKM/ATP5F1C/UQCC3/PFKP/PGAM1/ATP5PO/ATP5F1D/ATP5F1B/ATP5MF/ATP5ME/DDIT4/ENO1
GO:0071466	cellular response to xenobiotic stimulus	25/1382	164/17913	0.000795738	0.00745588	25	SERPINF1/CYP1B1/EPHX1/ERRFI1/FMO2/CDO1/FMO3/GSTM3/AKR1C1/GHR/EGFR/EGR1/AOC3/CYB5R3/MGST3/FBXO32/HSP90AB1/PHGDH/GSTP1/CES1/PTGES3/GSTO1/AHR/DDIT4/EIF4EBP1
GO:0034614	cellular response to reactive oxygen species	25/1382	165/17913	0.000870672	0.00792747	25	TPM1/CYP1B1/MMP2/PDGFRA/AXL/EGFR/RHOB/CST3/PAWR/KLF4/BNIP3/PDGFD/SOD1/NET1/JUN/AKR1C3/PARK7/PRDX2/SPHK1/RACK1/STK25/PRDX3/RPS3/KLF2/FOS
GO:0007163	establishment or maintenance of cell polarity	25/1382	172/17913	0.00158829	0.0127545	25	LMNA/MAP1B/DST/HES1/PARVA/FAT1/JAM3/PARD3/FEZ1/PTK2/CLIC4/PKD1/GSN/ROCK2/HSP90AB1/CTNNA1/ILK/MAP4/SPRY1/FSCN1/RACK1/STK25/ARF4/HSP90AA1/FAM89B
GO:0051897	positive regulation of protein kinase B signaling	25/1382	173/17913	0.00172388	0.0136267	25	IGFBP5/FGFR1/PDGFRB/GAS6/FGF7/PDGFRA/C1QTNF1/ANGPT1/KITLG/AKR1C2/PDGFA/FGFR3/EGFR/PTK2/TCF7L2/ITGB1/THBS1/ENG/HSP90AB1/ILK/AKR1C3/MYDGF/PARK7/HSP90AA1/C1QBP
GO:0035265	organ growth	25/1382	179/17913	0.00276368	0.0199711	25	LEPR/FOXC1/FGFR1/PDGFRB/FGF7/GJA1/DDR2/FOXC2/SORBS2/RBP4/AGT/YAP1/SOX9/TBX2/FGFR3/HEY2/COL27A1/PTK2/COMP/SAV1/PDLIM5/SOD1/YBX3/IGF1/MEF2C
GO:0032271	regulation of protein polymerization	25/1382	180/17913	0.00298046	0.0212517	25	MAP1B/EPS8/SLIT2/CTTN/CDC42EP5/NCKAP1/PFN2/LMOD1/SCIN/KIRREL1/CAMSAP2/ABI2/HSPA1B/MYO1C/WASL/GSN/RDX/ARL2/HSPA1A/SNX9/VDAC2/FKBP4/HSP90AA1/RPS3/AKAP9
GO:0001935	endothelial cell proliferation	25/1382	185/17913	0.0042923	0.0281277	25	APOE/SPARC/CXCL12/FGFR1/CAV1/MDK/NR2F2/GJA1/NRP2/SULF1/CAV2/MMP14/NRP1/NGFR/ANG/THBS1/CCL2/JUN/TNFSF12/BMPR2/AKT3/MYDGF/MEF2C/NR4A1/VEGFA
GO:0048839	inner ear development	25/1382	185/17913	0.0042923	0.0281277	25	SPARC/FRZB/FGFR1/PDGFRB/COL11A1/PRRX1/HES1/DLX5/SOX9/ALDH1A3/HEY2/DLX6/SIX1/JAG1/MAFB/SDC4/CEBPD/AHI1/SOD1/CTHRC1/ITGA8/TRIP11/COL2A1/ZEB1/INSIG2
GO:0042254	ribosome biogenesis	25/1382	202/17913	0.0128187	0.0644065	25	RPL5/SBDS/NPM1/GTF2H5/RAN/RPS2/RPL11/RPL14/RPS9/TRMT112/FAM207A/EIF6/PA2G4/NOP53/NHP2/RPS19/RPL26/RPS16/C1QBP/RPF2/RPL35A/EIF2A/NSA2/SNU13/RPS17
GO:0045766	positive regulation of angiogenesis	25/1382	203/17913	0.0135833	0.0674044	25	ANGPTL4/CYP1B1/MDK/S100A1/RRAS/FOXC2/SMOC2/TWIST1/NRP1/SASH1/HSPB6/PTGIS/RHOB/HSPB1/ITGB1/THBS1/ENG/KLF4/TNFSF12/AKT3/MYDGF/ANGPT2/SPHK1/PKM/VEGFA
GO:0035303	regulation of dephosphorylation	25/1382	206/17913	0.0160983	0.0754284	25	PDGFRB/PTN/FARP1/DLC1/RCAN2/NPNT/IGFBP3/SPRED1/ITGA1/MYO1D/PPP1R14A/BOD1/ROCK2/YWHAE/HSP90AB1/LGALS3/MTMR2/MEF2C/CAMTA1/RCAN1/CALM2/PPP1R14B/PPP1R15A/HSP90B1/SET
GO:0043523	regulation of neuron apoptotic process	25/1382	210/17913	0.0200107	0.0895325	25	LRP1/NUPR1/MDK/CHL1/NTRK2/AXL/ANGPT1/UNC5B/NRP1/NDNF/SIX1/ITGA1/BACE1/STXBP1/RETREG1/CCL2/SOD1/JUN/HSP90AB1/ILK/PARK7/MEF2C/CTNNB1/FIS1/SET
GO:0001894	tissue homeostasis	25/1382	214/17913	0.0246311	0.103224	25	FOXC1/BGLAP/EPAS1/PTH1R/CTSK/TF/RCN3/RBP4/WWTR1/CSF1/PDK4/TMEM119/YAP1/SOX9/TNFRSF11B/EGFR/HSPB1/PRDX1/SOD1/AKT3/CTNNB1/COL2A1/GNAS/VEGFA/ACTG1
GO:0042445	hormone metabolic process	25/1382	215/17913	0.0259057	0.107673	25	SELENOM/CYP1B1/FGFR1/PDGFRA/BMP5/RBP4/DIO2/DKK3/ENPEP/AKR1C1/AKR1C2/ALDH1A3/GHR/RBP1/EGR1/TCF7L2/COMT/PCSK5/CPQ/DHRS3/SPP1/AKR1C3/CES1/STUB1/ATP1A1
GO:0046651	lymphocyte proliferation	25/1382	244/17913	0.0889715	0.24895	25	VCAM1/HES1/GJA1/CD151/PDE5A/CD276/GPNMB/TWSG1/SDC4/CD81/IL6ST/PAWR/PURA/IGF1/CDKN1A/LGALS3/MIF/PRDX2/MEF2C/CTNNB1/IGFBP2/HSPD1/IMPDH2/RPS3/AHR
GO:0018209	peptidyl-serine modification	25/1382	252/17913	0.116773	0.304652	25	DCN/BGN/GAS6/CAV1/NTRK2/ANGPT1/PFN2/NDNF/EGFR/DCLK1/APP/PKD1/CAMK2D/ROCK2/HSP90AB1/ILK/MIF/PARK7/RACK1/SMAD7/HSP90AA1/VEGFA/AKAP9/NTMT1/DDIT4
GO:0032409	regulation of transporter activity	25/1382	257/17913	0.136618	0.338922	25	CAV1/FXYD1/GJA1/S100A1/FHL1/GEM/TWIST1/PLN/ANK2/APP/AHNAK/CCL2/RRAD/CAMK2D/YWHAE/PARK7/MEF2C/NDFIP1/AHCYL1/CHCHD10/SRI/CALM2/PHB2/GSTO1/AKAP9
GO:0016579	protein deubiquitination	25/1382	260/17913	0.149427	0.361344	25	OTUD7B/PSMB5/MYC/PARK7/PSMC3/PSMB6/PSMB1/SMAD7/PSMD8/RPS27A/UBB/NOP53/NEDD8/PSMD2/TOMM20/PSMA3/PSMC5/PSMD3/PSMB7/PSMC1/PSMA2/UBXN1/PSMA1/PSMC4/PSME2
GO:0043270	positive regulation of ion transport	25/1382	266/17913	0.177025	0.396472	25	APOE/CXCL12/PDGFRB/CAV1/THY1/FXYD1/S100A1/FHL1/AGT/ANK2/PLA2R1/MYLK/STXBP1/CCL2/LGALS3/MIF/PARK7/AHCYL1/CHCHD10/SRI/CALM2/GSTO1/FLNA/PRELID1/AKAP9
GO:0001818	negative regulation of cytokine production	25/1382	290/17913	0.310247	0.553286	25	FN1/APOD/FGFR1/GAS6/ERRFI1/AXL/NDRG2/TWIST1/ANGPT1/GPNMB/TWSG1/OTUD7B/THBS1/KLF4/LAPTM4B/HSP90AB1/IGF1/GSTP1/SARS/CUEDC2/SMAD7/C1QBP/INHBA/KLF2/ZFP36
GO:0009615	response to virus	25/1382	323/17913	0.523802	0.772086	25	CLU/CXCL12/ACTA2/IFITM3/HTRA1/DCLK1/HSPB1/BNIP3/BAD/ADARB1/IFI27/BANF1/IFI16/PRKRA/IFITM1/DDX1/NOP53/AP1S1/C1QBP/FLNA/IFI6/PSMA2/DDIT4/CCT5/ENO1
GO:0022412	cellular process involved in reproduction in multicellular organism	25/1382	326/17913	0.543073	0.780615	25	FOXC1/PTN/PLPP3/MDK/SFRP1/SLIT2/SLIT3/TMEM119/PDE5A/JAM3/CD9/PLPP1/ANG/ITGB1/SMAD5/NECTIN2/IGF1/CTNNB1/ANGPT2/RAN/UBB/SLIRP/ERCC1/INHBA/HEXB
GO:0009913	epidermal cell differentiation	25/1382	346/17913	0.664181	0.840869	25	SFRP4/FOXC1/FGFR1/HES1/ERRFI1/PALLD/CTSK/CTSL/YAP1/INTU/HEY2/JAG1/CLIC4/SAV1/KLF4/CD109/SOD1/ZFP36L1/ROCK2/AKR1C3/FLNB/CTNNB1/KRT10/TXNIP/ZFP36
GO:0006732	coenzyme metabolic process	25/1382	366/17913	0.766556	0.893217	25	NNMT/NUPR1/FMO2/PDK4/NT5E/PTGIS/CYB5R3/ZBTB20/IGF1/DBI/PDZD11/CYB5A/LDHA/PTS/TPI1/MDH1/MDH2/EIF6/PKM/GSTO1/MPC1/PFKP/PGAM1/DDIT4/ENO1
GO:0048285	organelle fission	25/1382	395/17913	0.874673	0.950051	25	DCN/PDGFRB/CDKN1C/EPS8/CAV2/P3H4/HSPA1B/BNIP3/NFE2L1/BOD1/IGF1/SUN1/HSPA1A/CHMP5/CALR/RPL24/FIS1/SPHK1/RAN/PSMG2/PHB2/UBB/FLNA/CENPX/CDC26
GO:0002697	regulation of immune effector process	25/1382	441/17913	0.962209	0.988777	25	CLU/CFH/HTRA1/SERPING1/C1R/C1S/A2M/RBP4/ANGPT1/IL1R1/CADM1/CD81/STXBP1/CD59/NECTIN2/LGALS3/MIF/CUEDC2/SMAD7/PHB/HSPD1/DDX1/NOP53/RPS19/C1QBP
GO:0030199	collagen fibril organization	24/1382	45/17913	1.26715e-15	3.06155e-13	24	COL1A1/COL1A2/COL3A1/LUM/FOXC1/AEBP1/CYP1B1/COL5A2/FMOD/ACAN/COL11A1/COL14A1/EMILIN1/DDR2/COL5A1/COL12A1/FOXC2/LOX/COL5A3/ADAMTS2/P3H4/COMP/P4HA1/COL2A1
GO:0006120	mitochondrial electron transport, NADH to ubiquinone	24/1382	55/17913	3.92746e-13	4.84998e-11	24	NDUFS4/PARK7/NDUFC2/NDUFB4/DNAJC15/NDUFB7/NDUFC1/NDUFB2/NDUFA8/NDUFA5/NDUFS5/NDUFA4/NDUFAB1/NDUFA12/NDUFB10/ISCU/NDUFA13/NDUFB5/NDUFV2/NDUFB6/NDUFB8/NDUFA6/NDUFA11/NDUFB3
GO:0048844	artery morphogenesis	24/1382	76/17913	1.22108e-09	8.37724e-08	24	COL3A1/APOE/FOXC1/LRP1/PDGFRB/MDK/PRRX1/HES1/NOTCH3/FOXC2/NRP1/TBX2/HEY2/SIX1/JAG1/MYLK/SOX4/COMP/ADAMTS9/ENG/BMPR2/AKT3/SMAD7/VEGFA
GO:0002062	chondrocyte differentiation	24/1382	97/17913	2.31792e-07	8.47412e-06	24	FGFR1/ACAN/COL11A1/MDK/SERPINH1/PTH1R/EFEMP1/SULF1/NFIB/SNAI2/SOX9/SCIN/FGFR3/COL27A1/SHOX2/TGFBI/RUNX2/COMP/BMPR2/TRPS1/MEF2C/TRIP11/CTNNB1/COL2A1
GO:0072163	mesonephric epithelium development	24/1382	99/17913	3.48713e-07	1.21112e-05	24	FOXC1/FGFR1/HES1/PGF/SFRP1/FOXC2/SLIT2/AGT/SOX9/FOXD1/NPNT/SIX1/SDC4/PBX1/LZTS2/PKD1/MAGED1/SMAD5/ILK/SPRY1/MYC/CTNNB1/SMAD7/VEGFA
GO:0072164	mesonephric tubule development	24/1382	99/17913	3.48713e-07	1.21112e-05	24	FOXC1/FGFR1/HES1/PGF/SFRP1/FOXC2/SLIT2/AGT/SOX9/FOXD1/NPNT/SIX1/SDC4/PBX1/LZTS2/PKD1/MAGED1/SMAD5/ILK/SPRY1/MYC/CTNNB1/SMAD7/VEGFA
GO:0001823	mesonephros development	24/1382	103/17913	7.60093e-07	2.32079e-05	24	FOXC1/FGFR1/HES1/PGF/SFRP1/FOXC2/SLIT2/AGT/SOX9/FOXD1/NPNT/SIX1/SDC4/PBX1/LZTS2/PKD1/MAGED1/SMAD5/ILK/SPRY1/MYC/CTNNB1/SMAD7/VEGFA
GO:0072009	nephron epithelium development	24/1382	109/17913	2.2445e-06	5.91122e-05	24	FOXC1/HES1/PGF/FOXC2/AGT/LAMB2/WWTR1/IRX3/YAP1/SOX9/FOXD1/NPNT/SIX1/JAG1/PBX1/LZTS2/AHI1/PKD1/MAGED1/ILK/MYC/MEF2C/CTNNB1/VEGFA
GO:0022612	gland morphogenesis	24/1382	116/17913	7.07259e-06	0.000152335	24	IGFBP5/TNC/FGFR1/ID4/CAV1/PTN/FGF7/MDK/SFRP1/SULF1/NFIB/CSF1/NRP1/SNAI2/SOX9/TBX2/PDGFA/EGFR/NTN4/TWSG1/CRIP1/PLXND1/PHB2/TGM2
GO:0048706	embryonic skeletal system development	24/1382	117/17913	8.25625e-06	0.000171835	24	COL1A1/COL11A1/PDGFRA/PRRX1/MDFI/SULF1/FOXC2/RBP4/MMP14/TWIST1/SATB2/TBX15/SIX1/SHOX2/RUNX2/PBX1/TULP3/SLC39A1/PCSK5/MEF2C/CTNNB1/COL2A1/ZEB1/GNAS
GO:0003158	endothelium development	24/1382	124/17913	2.30031e-05	0.000400716	24	ID1/PTN/NR2F2/GJA1/FOXC2/PDPN/TJP1/NRP1/GSTM3/HEY2/JAG1/RHOB/S1PR3/CLIC4/COL18A1/ENG/AFDN/ROCK2/BMPR2/TNFRSF1A/RDX/CTNNB1/EDF1/ZEB1
GO:0051592	response to calcium ion	24/1382	126/17913	3.02867e-05	0.000492115	24	SPARC/CAV1/CCND1/S100A16/KCNMA1/EGFR/CLIC4/THBS1/JUN/CAMK2D/BAD/AKR1C3/MEF2C/FOSB/AHCYL1/SEC31A/MEF2A/CALM2/JUNB/TXNIP/HSPA5/FOS/FUS/ACTG1
GO:0051017	actin filament bundle assembly	24/1382	136/17913	0.000107862	0.0014655	24	TPM1/ID1/RHOC/EPS8/ITGB5/MYO1B/SFRP1/LIMCH1/DPYSL3/DLC1/NRP1/PFN2/LIMA1/SORBS3/SDC4/PAWR/S100A10/PHLDB2/ROCK2/FSCN1/RDX/FLNA/HSP90B1/MARCKS
GO:0061572	actin filament bundle organization	24/1382	137/17913	0.000121378	0.00163316	24	TPM1/ID1/RHOC/EPS8/ITGB5/MYO1B/SFRP1/LIMCH1/DPYSL3/DLC1/NRP1/PFN2/LIMA1/SORBS3/SDC4/PAWR/S100A10/PHLDB2/ROCK2/FSCN1/RDX/FLNA/HSP90B1/MARCKS
GO:0034250	positive regulation of cellular amide metabolic process	24/1382	140/17913	0.000171409	0.00220491	24	CLU/RBMS3/LARP6/SOX4/VIM/APP/THBS1/SAMD4A/YBX3/ROCK2/TNFRSF1A/RPL5/NPM1/RPS27L/CIRBP/RPS4X/EEF2/RACK1/EIF5A/EIF6/RPL26/C1QBP/PPP1R15A/EIF3D
GO:0061041	regulation of wound healing	24/1382	143/17913	0.000238925	0.00280107	24	APOE/SERPINE2/SERPING1/CAV1/PDGFRA/PLPP3/TFPI/GJA1/C1QTNF1/FOXC2/SMOC2/PDPN/PDGFA/PRKG1/FAP/MYLK/CD9/TNFRSF12A/THBS1/VKORC1/CD109/PHLDB2/CDKN1A/PRDX2
GO:0035567	non-canonical Wnt signaling pathway	24/1382	145/17913	0.000296071	0.00341342	24	SFRP4/SFRP1/DAAM2/DAB2/TCF7L2/PSMB5/CTHRC1/RYK/CTNNB1/PSMC3/PSMB6/PSMB1/PSMD8/PSMD2/AP2M1/PSMA3/PSMC5/PSMD3/PSMB7/PSMC1/PSMA2/PSMA1/PSMC4/PSME2
GO:0050770	regulation of axonogenesis	24/1382	148/17913	0.000404347	0.00429886	24	FN1/APOE/CXCL12/LRP1/MAP1B/THY1/NTRK2/SLIT2/CTTN/NRP1/NGFR/EFNA5/SHOX2/PTK2/TNFRSF12A/CHN1/BMPR2/SPP1/ILK/METRN/RYK/DPYSL2/STK25/VEGFA
GO:1990138	neuron projection extension	24/1382	148/17913	0.000404347	0.00429886	24	FN1/APOE/CXCL12/LRP1/MAP1B/NRP2/SLIT2/LAMB2/CTTN/SLIT3/NDN/NRP1/TMEM108/DCLK1/TNFRSF12A/ITGB1/BMPR2/HSP90AB1/ILK/RYK/DPYSL2/CTNNB1/HSP90AA1/VEGFA
GO:0035051	cardiocyte differentiation	24/1382	154/17913	0.000728911	0.00691222	24	LMNA/VCAM1/PDGFRB/PDGFRA/HES1/SGCB/SORBS2/AGT/TWIST1/TBX2/HEY2/EGFR/JAG1/CBY1/ITGB1/PDLIM5/MYH11/MYH10/IGF1/SPRY1/MEF2C/CALR/MEF2A/VEGFA
GO:0030203	glycosaminoglycan metabolic process	24/1382	157/17913	0.000963082	0.00863609	24	DCN/LUM/BGN/PRELP/FOXC1/FMOD/PDGFRB/ACAN/OGN/SDC2/OMD/ANGPT1/HSPG2/ITIH5/NDNF/CSPG4/DSEL/CHST3/GPC1/UGDH/SDC4/VCAN/EXT2/HEXB
GO:0006022	aminoglycan metabolic process	24/1382	161/17913	0.00137465	0.0114683	24	DCN/LUM/BGN/PRELP/FOXC1/FMOD/PDGFRB/ACAN/OGN/SDC2/OMD/ANGPT1/HSPG2/ITIH5/NDNF/CSPG4/DSEL/CHST3/GPC1/UGDH/SDC4/VCAN/EXT2/HEXB
GO:0010950	positive regulation of endopeptidase activity	24/1382	161/17913	0.00137465	0.0114683	24	BEX3/DLC1/NGFR/ASPH/GSN/ROCK2/BAD/MYC/PDCD5/IFT57/MTCH1/FAM162A/FIS1/DAP/RPS27L/RACK1/IFI16/HSPE1/ARL6IP5/HSPD1/NDUFA13/RPS3/PRELID1/CYCS
GO:0031032	actomyosin structure organization	24/1382	163/17913	0.00163179	0.0130285	24	TPM1/PDGFRB/PDGFRA/RHOC/CNN3/ITGB5/SFRP1/LIMCH1/DLC1/NRP1/PFN2/SORBS3/CDC42BPA/SDC4/ITGB1/MYH11/S100A10/MYH10/PHLDB2/ROCK2/CFL2/MEF2C/MEF2A/ACTG1
GO:0001936	regulation of endothelial cell proliferation	24/1382	170/17913	0.00288086	0.0206301	24	APOE/SPARC/CXCL12/FGFR1/CAV1/MDK/NR2F2/GJA1/NRP2/SULF1/CAV2/NRP1/NGFR/ANG/THBS1/CCL2/JUN/TNFSF12/BMPR2/AKT3/MYDGF/MEF2C/NR4A1/VEGFA
GO:0071478	cellular response to radiation	24/1382	173/17913	0.00362317	0.0247442	24	ADIRF/CRYAB/PTN/SFRP1/SNAI2/YAP1/RHOB/EGR1/NET1/NUCKS1/MAP3K20/MYC/MGMT/CRIP1/CDKN1A/NPM1/TMEM109/GTF2H5/IFI16/RPL26/COPS9/HSPA5/METAP2/GADD45A
GO:0046890	regulation of lipid biosynthetic process	24/1382	195/17913	0.0154702	0.074174	24	APOE/IGFBP7/BMP5/PDK4/DKK3/SNAI2/PDGFA/CCDC3/EGR1/SNAI1/SOD1/ZBTB20/TNFRSF1A/ACADVL/AKR1C3/SPHK1/CAPN2/INSIG2/RACK1/RAN/MBTPS1/EIF6/ATP1A1/FDPS
GO:0031396	regulation of protein ubiquitination	24/1382	196/17913	0.0163833	0.0765704	24	CAV1/ANGPT1/SASH1/SOX4/HSPA1B/HSP90AB1/PTTG1IP/RPL5/PARK7/HSPA1A/NDFIP1/SPHK1/CAMLG/SMAD7/RPS2/RPL11/UBB/HSP90AA1/STUB1/RPS3/DNAJA1/CENPX/HSPA5/UBXN1
GO:0006006	glucose metabolic process	24/1382	204/17913	0.025311	0.105516	24	IGFBP5/IGFBP4/LEPR/APOD/ENPP1/C1QTNF1/RBP4/PDK4/IGFBP3/PHLDA2/NFE2L1/ATF3/BAD/IGF1/FAM3C/COX11/TPI1/MDH1/MDH2/PKM/PFKP/AKR1A1/PGAM1/ENO1
GO:0010951	negative regulation of endopeptidase activity	24/1382	210/17913	0.034165	0.132027	24	TIMP1/CRYAB/COL6A3/TIMP3/GAS6/TFPI/BEX3/A2M/ITIH5/NGFR/CST3/CRIM1/APP/THBS1/PEBP1/KLF4/CD109/YWHAE/PARK7/IFI16/SERPINB6/PRDX3/VEGFA/IFI6
GO:0034404	nucleobase-containing small molecule biosynthetic process	24/1382	211/17913	0.0358422	0.136251	24	NUPR1/ENPP1/NT5E/PDE5A/NME3/ZBTB20/NME4/IGF1/LDHA/ADK/TPI1/NME1/EIF6/PKM/CMPK1/IMPDH2/PFKP/PGAM1/NUDT5/DNPH1/DDIT4/HINT1/ENO1/APRT
GO:0042593	glucose homeostasis	24/1382	227/17913	0.0716686	0.217987	24	IGFBP5/LGALS1/SERPINF1/LEPR/LRP1/GAS6/RBP4/PDK4/NGFR/EFNA5/SOX4/TCF7L2/ZBTB20/NUCKS1/PHPT1/BAD/PARK7/HMGN3/FIS1/NDUFAF2/RACK1/SRI/NME1/JAGN1
GO:0033500	carbohydrate homeostasis	24/1382	228/17913	0.0745176	0.221204	24	IGFBP5/LGALS1/SERPINF1/LEPR/LRP1/GAS6/RBP4/PDK4/NGFR/EFNA5/SOX4/TCF7L2/ZBTB20/NUCKS1/PHPT1/BAD/PARK7/HMGN3/FIS1/NDUFAF2/RACK1/SRI/NME1/JAGN1
GO:0006352	DNA-templated transcription, initiation	24/1382	231/17913	0.0835247	0.241743	24	CAVIN1/NOTCH3/CCND1/WWTR1/TWIST1/YAP1/SOX9/TEAD1/HEY2/RUNX2/THRA/TCF4/JUN/MAML2/CDKN1A/POLR2F/CTNNB1/GTF2H5/POLR2H/NR4A1/POLR2E/POLR2I/POLR2L/POLR2K
GO:0019318	hexose metabolic process	24/1382	239/17913	0.110992	0.291073	24	IGFBP5/IGFBP4/LEPR/APOD/ENPP1/C1QTNF1/RBP4/PDK4/IGFBP3/PHLDA2/NFE2L1/ATF3/BAD/IGF1/FAM3C/COX11/TPI1/MDH1/MDH2/PKM/PFKP/AKR1A1/PGAM1/ENO1
GO:0022898	regulation of transmembrane transporter activity	24/1382	242/17913	0.122603	0.309825	24	CAV1/FXYD1/GJA1/S100A1/FHL1/GEM/TWIST1/PLN/ANK2/APP/AHNAK/CCL2/RRAD/CAMK2D/YWHAE/PARK7/MEF2C/AHCYL1/CHCHD10/SRI/CALM2/PHB2/GSTO1/AKAP9
GO:0051480	regulation of cytosolic calcium ion concentration	24/1382	289/17913	0.383805	0.627664	24	LRP1/CAV1/THY1/PDGFRA/GJA1/PTH1R/C1QTNF1/AGT/PLN/EDNRA/SYNPO/ANK2/ANXA2/S1PR3/ITGAV/PKD1/CAMK2D/YWHAE/FIS1/ABL2/SRI/CALM2/GSTO1/TGM2
GO:0070588	calcium ion transmembrane transport	24/1382	293/17913	0.410442	0.653527	24	GAS6/THY1/S100A1/GEM/PLN/ANK2/ANXA2/ITGAV/AHNAK/ANXA5/PKD1/RRAD/CAMK2D/YWHAE/SESTD1/PHB/TMCO1/VDAC1/SRI/CALM2/STOML2/PHB2/ATP2A2/GSTO1
GO:0016042	lipid catabolic process	24/1382	300/17913	0.45738	0.70582	24	PLA2G2A/LRP1/CYP1B1/RARRES2/LPL/TWIST1/BDH2/ENPP2/PLD3/THRA/SPP1/MGLL/ACADVL/AKR1C3/ECH1/PRDX6/SPHK1/ETFB/HADHB/ACAA2/ECHS1/IAH1/HEXB/HADHA
GO:0060349	bone morphogenesis	23/1382	90/17913	2.19259e-07	8.12282e-06	23	COL1A1/SFRP4/FOXC1/SERPINH1/DLX5/MMP14/TWIST1/TMEM119/SOX9/FGFR3/COL27A1/COL13A1/SHOX2/RUNX2/COMP/ALPL/BMPR2/DHRS3/MEF2C/TRIP11/COL2A1/GNAS/INSIG2
GO:0007229	integrin-mediated signaling pathway	23/1382	94/17913	5.09882e-07	1.66672e-05	23	COL3A1/TIMP1/EMP2/PTN/THY1/DST/ADAMTS1/FERMT2/ITGB5/ITGA10/NRP1/COL16A1/DOCK1/ITGA7/ITGA1/PTK2/CD63/ITGB1/ITGAV/CTNNA1/ILK/ITGA8/FLNA
GO:0045778	positive regulation of ossification	23/1382	94/17913	5.09882e-07	1.66672e-05	23	ID4/PTN/GJA1/DDR2/FAM20C/TMEM119/NPNT/JAG1/RUNX2/IL6ST/CEBPD/GPM6B/SMAD5/CTHRC1/BMPR2/ILK/IGF1/TOB2/MEF2C/ATRAID/CTNNB1/GNAS/IFITM1
GO:0001657	ureteric bud development	23/1382	98/17913	1.12302e-06	3.30193e-05	23	FOXC1/FGFR1/HES1/PGF/SFRP1/FOXC2/SLIT2/AGT/SOX9/FOXD1/NPNT/SIX1/SDC4/PBX1/LZTS2/MAGED1/SMAD5/ILK/SPRY1/MYC/CTNNB1/SMAD7/VEGFA
GO:0003279	cardiac septum development	23/1382	113/17913	1.44578e-05	0.00027609	23	HES1/LTBP1/NRP2/BMP5/SLIT2/SLIT3/PARVA/NRP1/TBX2/HEY2/ANK2/JAG1/SOX4/SAV1/ENG/PCSK5/MYH10/BMPR2/DHRS3/LMO4/TRIP11/PLXND1/SMAD7
GO:0001952	regulation of cell-matrix adhesion	23/1382	117/17913	2.60765e-05	0.000437088	23	APOD/LRP1/EMP2/THY1/SFRP1/MMP14/LIMCH1/CSF1/DLC1/NRP1/COL16A1/EPHA3/EFNA5/JAG1/SDC4/PTK2/THBS1/GPM6B/S100A10/PHLDB2/ROCK2/ILK/VEGFA
GO:1900180	regulation of protein localization to nucleus	23/1382	117/17913	2.60765e-05	0.000437088	23	LMNA/APOD/TMEM98/ANGPT1/NGFR/DCLK1/OTUD7B/BAG3/LZTS2/PKIG/PARK7/TRIM8/CCT3/RAN/MDFIC/CCT7/CCT4/TCP1/FLNA/CCT6A/CCT2/CCT8/CCT5
GO:0044106	cellular amine metabolic process	23/1382	121/17913	4.55093e-05	0.00070054	23	HNMT/ALDH7A1/PSMB5/COMT/SAT2/PARK7/PNKD/PSMC3/PSMB6/PSMB1/PSMD8/SRM/PSMD2/PSMA3/PSMC5/PSMD3/PSMB7/DHPS/PSMC1/PSMA2/PSMA1/PSMC4/PSME2
GO:0046718	viral entry into host cell	23/1382	121/17913	4.55093e-05	0.00070054	23	IFITM3/LGALS1/GAS6/CAV1/NCAM1/ITGB5/AXL/CAV2/EGFR/CD81/HSPA1B/ITGB1/ITGAV/SCARB2/GSN/NECTIN2/HSPA1A/TRIM8/CTSB/SIVA1/IFITM1/PPIA/P4HB
GO:0042476	odontogenesis	23/1382	126/17913	8.74766e-05	0.00122508	23	COL1A1/COL1A2/ID3/HTRA1/TNC/FOXC1/BGLAP/PDGFRA/NFIC/ASPN/FAM20C/TWIST1/CSF1/ADAMTS5/LAMB1/TNFRSF11B/PAM/RUNX2/ALPL/CTNNA1/CTNNB1/ZNF22/INHBA
GO:0030509	BMP signaling pathway	23/1382	134/17913	0.000227666	0.00272908	23	SFRP4/HTRA1/FBN1/ID1/FSTL1/HES1/NBL1/DLX5/SFRP1/SULF1/CHRDL1/NEO1/FOXD1/TWSG1/RUNX2/EGR1/COMP/ENG/SMAD5/BMPR2/ILK/SMAD7/TOB1
GO:0035967	cellular response to topologically incorrect protein	23/1382	135/17913	0.000254766	0.00297423	23	LMNA/CCND1/BAG3/KDELR3/CCL2/ATF3/ACADVL/MYDGF/YIF1A/HSPA1A/SHC1/CALR/SEC31A/PDIA6/RACK1/MBTPS1/OPTN/STUB1/HSPA5/PPP1R15A/RNF5/HSP90B1/SDF2L1
GO:0008584	male gonad development	23/1382	137/17913	0.000317611	0.00358005	23	PDGFRB/NUPR1/PDGFRA/GJA1/RHOBTB3/CCND1/SFRP1/MMP14/SOX9/KITLG/HOXA10/CST3/PRDX4/ARID5B/YBX3/RAB13/CTNNA1/AKR1C3/UBB/ERCC1/INHBA/FLNA/EIF2S2
GO:0010770	positive regulation of cell morphogenesis involved in differentiation	23/1382	138/17913	0.000353857	0.00387083	23	FN1/CXCL12/LRP1/MAP1B/MDK/NTRK2/SLIT2/NRP1/NGFR/PTPRD/DOCK1/EFNA5/SHOX2/TNFRSF12A/S100A10/BMPR2/ILK/METRN/CALR/STK25/C1QBP/VEGFA/FLNA
GO:0046546	development of primary male sexual characteristics	23/1382	138/17913	0.000353857	0.00387083	23	PDGFRB/NUPR1/PDGFRA/GJA1/RHOBTB3/CCND1/SFRP1/MMP14/SOX9/KITLG/HOXA10/CST3/PRDX4/ARID5B/YBX3/RAB13/CTNNA1/AKR1C3/UBB/ERCC1/INHBA/FLNA/EIF2S2
GO:0055002	striated muscle cell development	23/1382	145/17913	0.000725501	0.00689164	23	TPM1/LMNA/PDGFRB/PDGFRA/SGCB/SORBS2/CAV2/LOX/AGT/HEY2/SHOX2/COMP/ITGB1/MYOF/PDLIM5/MYH11/MYH10/CFL2/IGF1/MEF2C/MEF2A/VEGFA/ACTG1
GO:0035107	appendage morphogenesis	23/1382	146/17913	0.000799659	0.00745588	23	FGFR1/PRRX1/GJA1/DLX5/TWIST1/SOX9/TBX2/HOXA10/FAM92A/INTU/DYNC2H1/DLX6/SHOX2/RUNX2/ASPH/SOX4/PBX1/TULP3/PCSK5/MAP3K20/CTNNB1/COL2A1/GNAS
GO:0035108	limb morphogenesis	23/1382	146/17913	0.000799659	0.00745588	23	FGFR1/PRRX1/GJA1/DLX5/TWIST1/SOX9/TBX2/HOXA10/FAM92A/INTU/DYNC2H1/DLX6/SHOX2/RUNX2/ASPH/SOX4/PBX1/TULP3/PCSK5/MAP3K20/CTNNB1/COL2A1/GNAS
GO:1902600	proton transmembrane transport	23/1382	148/17913	0.00096787	0.00864703	23	NDUFA4L2/COX7A1/TWIST1/PARK7/ATP5MC3/ATP5PF/CYB5A/COX6C/CHCHD10/NDUFA4/SLC25A3/STOML2/PHB2/ATP2A2/ATP5MC1/ATP5F1C/COX6A1/ATP5PO/ATP5F1D/ATP5F1B/ATP5MF/COX7C/ATP5ME
GO:0021543	pallium development	23/1382	166/17913	0.00440687	0.0286156	23	COL3A1/LRP1/ID4/MDK/NTRK2/NRP2/SLIT2/GNG12/NRP1/TMEM108/LAMB1/EGFR/DIXDC1/FEZ1/BNIP3/YWHAE/BAD/SUN1/CTNNB1/RAN/NME1/UQCRQ/FLNA
GO:0043112	receptor metabolic process	23/1382	177/17913	0.00952841	0.0519621	23	APOE/SFRP4/LRP1/CAV1/ACKR3/ANGPT1/RAMP1/CD9/ANXA2/CD81/CD63/ITGB1/ITGAV/AHI1/CNPY2/MTMR2/CHMP5/LRPAP1/CAMLG/CLTA/OPTN/VEGFA/AP2M1
GO:0016072	rRNA metabolic process	23/1382	191/17913	0.0220883	0.0963459	23	CAVIN1/ANG/RPL5/SBDS/GTF2H5/RPS2/RPL11/RPL14/RPS9/TRMT112/FAM207A/PA2G4/NOP53/NHP2/RPS19/RPL26/RPS16/NCL/GTF3C6/RPL35A/NSA2/SNU13/RPS17
GO:1901343	negative regulation of vasculature development	23/1382	191/17913	0.0220883	0.0963459	23	DCN/SPARC/SERPINF1/FOXC1/PTN/EMILIN1/SULF1/AGT/COL4A2/HSPG2/NGFR/HEY2/THBS2/SPRED1/ADAMTS9/THBS1/KLF4/EPN2/ROCK2/CTNNB1/ANGPT2/SARS/KLF2
GO:0033157	regulation of intracellular protein transport	23/1382	220/17913	0.084195	0.242691	23	APOD/GAS6/ANGPT1/PTPN14/CD81/TCF7L2/BAG3/MYO1C/LEPROT/PKIG/YWHAE/NUCB1/PDCD5/PARK7/IFI27/LMAN1/FIS1/ERLEC1/RAN/OS9/MDFIC/FLNA/TOMM7
GO:0007611	learning or memory	23/1382	247/17913	0.201023	0.431307	23	APOE/SERPINF1/PTN/MDK/NTRK2/AGT/SYNPO/EGFR/NRXN2/MAP1A/ITGB1/S100B/APP/THRA/ADCY3/COMT/JUN/ITGA8/MEF2C/VDAC1/ARF4/VDAC3/FOS
GO:0032868	response to insulin	23/1382	252/17913	0.228831	0.465623	23	RARRES2/BGLAP/LPL/ERRFI1/ENPP1/FOXC2/CAV2/AGT/PLN/PDK4/EGR1/MYO1C/ZFP36L1/RAB13/NUCKS1/GSTP1/SHC1/INSIG2/USO1/EIF6/HADHA/EIF4EBP1/APRT
GO:0046883	regulation of hormone secretion	23/1382	254/17913	0.240417	0.472084	23	LRP1/FGFR1/GJA1/C1QTNF1/SFRP1/RBP4/AGT/EGFR/EFNA5/SOX4/TCF7L2/SPP1/PHPT1/BAD/ARL2/HMGN3/NDUFAF2/GNAS/SRI/SLC25A6/INHBA/JAGN1/SLC25A5
GO:0044262	cellular carbohydrate metabolic process	23/1382	256/17913	0.252249	0.489266	23	IGFBP5/IGFBP4/LEPR/NUPR1/PTH1R/ENPP1/C1QTNF1/PDK4/IGFBP3/IL6ST/MYOF/ISYNA1/PHLDA2/NFE2L1/EXT2/SCARB2/BAD/IGF1/FAM3C/MTMR2/COX11/PGAM1/DDIT4
GO:0044843	cell cycle G1/S phase transition	23/1382	288/17913	0.463024	0.710103	23	ID4/ADAMTS1/FHL1/CCND1/EGFR/GPNMB/KANK2/SOX4/ITGB1/KLF4/PKD1/CCL2/MYC/RDX/CDKN1A/BCAT1/PRMT1/RPS27L/PHB2/RPL26/INHBA/GADD45A/EIF4EBP1
GO:0034470	ncRNA processing	23/1382	293/17913	0.49718	0.745301	23	RPL5/SBDS/GTF2H5/SARS/RPS2/RPL11/SSB/RPL14/PRKRA/RPS9/TRMT112/FAM207A/DDX1/PA2G4/NHP2/RPS19/RPL26/RPS16/RTRAF/RPL35A/NSA2/SNU13/RPS17
GO:0033044	regulation of chromosome organization	23/1382	311/17913	0.615473	0.814331	23	LMNA/TWIST1/SNAI2/EID1/CAMK2D/MYC/SETD7/CTNNB1/CCT3/PSMG2/CCT7/ERCC1/MPHOSPH8/CCT4/VEGFA/TCP1/CCT6A/HNRNPA1/CDC26/CCT2/CCT8/SET/CCT5
GO:0015711	organic anion transport	23/1382	430/17913	0.97911	0.995229	23	APOE/PLA2G2A/GJA1/NTRK2/AGT/PDPN/SLC7A2/AKR1C1/PPFIA2/PLA2R1/PLTP/THBS1/STXBP1/NFE2L1/SCARB2/SLC1A3/MIF/ATP5PF/ARL6IP5/SLC25A6/PRELID1/SLC25A5/PLIN2
GO:0002181	cytoplasmic translation	22/1382	69/17913	4.86583e-09	2.78757e-07	22	YBX3/RPL24/RPL10A/EEF2/RPS23/RPL41/RPL11/RPL8/RPL18/RPL6/EIF3I/RPL19/RPL18A/RPL32/EIF3G/RPL36/RPL36A/RPL13A/EIF3B/RPL31/EIF3D/EIF4EBP1
GO:0007045	cell-substrate adherens junction assembly	22/1382	81/17913	1.25005e-07	4.92662e-06	22	APOD/LRP1/THY1/FERMT2/SFRP1/MMP14/CTTN/LIMCH1/DLC1/NRP1/COL16A1/TRIP6/EPHA3/EFNA5/SDC4/PTK2/THBS1/GPM6B/S100A10/PHLDB2/ROCK2/VEGFA
GO:0048041	focal adhesion assembly	22/1382	81/17913	1.25005e-07	4.92662e-06	22	APOD/LRP1/THY1/FERMT2/SFRP1/MMP14/CTTN/LIMCH1/DLC1/NRP1/COL16A1/TRIP6/EPHA3/EFNA5/SDC4/PTK2/THBS1/GPM6B/S100A10/PHLDB2/ROCK2/VEGFA
GO:0048145	regulation of fibroblast proliferation	22/1382	86/17913	3.92673e-07	1.34697e-05	22	FN1/PDGFRB/NUPR1/GAS6/PDGFRA/DDR2/SFRP1/AGT/PDGFA/EGFR/PAWR/PDGFC/PDGFD/JUN/NDUFS4/IGF1/MYC/CDKN1A/GSTP1/MIF/CTNNB1/SPHK1
GO:0048144	fibroblast proliferation	22/1382	87/17913	4.87682e-07	1.62278e-05	22	FN1/PDGFRB/NUPR1/GAS6/PDGFRA/DDR2/SFRP1/AGT/PDGFA/EGFR/PAWR/PDGFC/PDGFD/JUN/NDUFS4/IGF1/MYC/CDKN1A/GSTP1/MIF/CTNNB1/SPHK1
GO:0010717	regulation of epithelial to mesenchymal transition	22/1382	91/17913	1.11782e-06	3.30193e-05	22	COL1A1/FOXC1/MDK/VASN/SFRP1/BMP5/TGFB1I1/PDPN/WWTR1/TWIST1/BAMBI/EPHA3/ZNF703/JAG1/PHLDB1/DAB2/TCF7L2/ENG/SNAI1/PHLDB2/CTNNB1/SMAD7
GO:0061326	renal tubule development	22/1382	95/17913	2.42458e-06	6.24505e-05	22	HES1/PGF/COL4A1/AGT/WWTR1/IRX3/YAP1/SOX9/FOXD1/NPNT/SIX1/JAG1/PBX1/LZTS2/AHI1/PKD1/MAGED1/ILK/MYC/MEF2C/CTNNB1/VEGFA
GO:0006415	translational termination	22/1382	100/17913	5.95232e-06	0.000132543	22	GADD45GIP1/MRPL32/MRPS26/MRPL18/MRPL34/MRPL43/MRPL27/MRPL40/MRPS21/MRPL17/EIF5A/MRPL36/TRMT112/MRPL33/MRPL41/MRPS36/MRPL20/MRPL14/MRPS6/MRPS15/MRPL11/MRPL3
GO:0048675	axon extension	22/1382	101/17913	7.06265e-06	0.000152335	22	FN1/APOE/CXCL12/LRP1/MAP1B/NRP2/SLIT2/LAMB2/CTTN/SLIT3/NDN/NRP1/DCLK1/TNFRSF12A/ITGB1/BMPR2/HSP90AB1/ILK/RYK/DPYSL2/HSP90AA1/VEGFA
GO:0043200	response to amino acid	22/1382	106/17913	1.59671e-05	0.000297748	22	COL1A1/COL1A2/COL3A1/COL6A1/COL5A2/MMP2/PTN/PDGFRA/NTRK2/CDO1/COL4A1/COL16A1/EGFR/SIX1/PDGFC/PDGFD/BAD/GSTP1/RRAGA/ZEB1/CAPN2/TOMM20
GO:0021782	glial cell development	22/1382	111/17913	3.39688e-05	0.000539327	22	CLU/LRP1/MXRA8/ID4/MDK/NTRK2/LAMB2/LGI4/WASF3/EGFR/PARD3/CD9/SOX4/VIM/APP/NDRG1/SOD1/GSN/ILK/PHGDH/GSTP1/EIF2B1
GO:0007006	mitochondrial membrane organization	22/1382	122/17913	0.000148526	0.0019512	22	BNIP3/YWHAE/BAD/YWHAQ/PDCD5/HSPA1A/ATP5MC3/ATP5PF/CHCHD10/ACAA2/ALKBH7/ATP5MC1/NDUFA13/ATP5F1C/HSP90AA1/UQCC3/ATP5PO/ATP5F1D/ATP5F1B/ATP5MF/ATP5ME/SLC25A5
GO:0031333	negative regulation of protein complex assembly	22/1382	127/17913	0.000269817	0.00313676	22	CLU/CRYAB/PMEPA1/EPS8/SLIT2/PFN2/LMOD1/SCIN/HEY2/STXBP1/THRA/GSN/LMO4/RDX/PARK7/NBDY/DNAJC15/VDAC2/FKBP4/NOP53/RPL13A/EIF4EBP1
GO:0010595	positive regulation of endothelial cell migration	22/1382	129/17913	0.000338667	0.00376395	22	SPARC/FGFR1/PLPP3/NRP2/FOXC2/SMOC2/AGT/ANGPT1/NRP1/SASH1/ADGRA2/RHOB/HSPB1/AMOTL1/THBS1/ROCK2/BMPR2/AKT3/CALR/AAMP/VEGFA/ATP5F1B
GO:1903364	positive regulation of cellular protein catabolic process	22/1382	129/17913	0.000338667	0.00376395	22	CLU/APOE/LRP1/NUPR1/CAV1/DAB2/PTK2/CD81/RDX/PTTG1IP/MAGEF1/HSPA1A/PSMC3/RACK1/SMAD7/NOP53/HSP90AA1/STUB1/PSMC5/PSMC1/SUMO2/PSMC4
GO:0030048	actin filament-based movement	22/1382	132/17913	0.000470734	0.00479976	22	TPM2/TPM1/EMP2/CAV1/GJA1/FRMD6/MYO1B/PDPN/PLN/PARVA/MYO6/ANK2/VIM/MYO1C/WASL/MYH10/CAMK2D/MYL6B/TPM4/SRI/ATP1A1/FLNA
GO:2001056	positive regulation of cysteine-type endopeptidase activity	22/1382	135/17913	0.000645631	0.00626138	22	BEX3/DLC1/NGFR/ASPH/GSN/BAD/MYC/PDCD5/IFT57/MTCH1/FAM162A/FIS1/DAP/RPS27L/RACK1/IFI16/HSPE1/ARL6IP5/HSPD1/NDUFA13/RPS3/CYCS
GO:0001738	morphogenesis of a polarized epithelium	22/1382	139/17913	0.000964726	0.00863609	22	SFRP1/INTU/DAB2/PSMB5/AHI1/CTHRC1/RYK/PSMC3/PSMB6/PSMB1/PSMD8/PSMD2/AP2M1/PSMA3/PSMC5/PSMD3/PSMB7/PSMC1/PSMA2/PSMA1/PSMC4/PSME2
GO:0017038	protein import	22/1382	140/17913	0.00106305	0.00934506	22	CLU/APOE/LMNA/APOD/AGT/ANGPT1/BAG3/PKIG/PTTG1IP/PDCD5/CDKN1A/RAN/MBTPS1/MDFIC/PHB2/NDUFA13/HSP90AA1/CBLB/HSPA8/FLNA/TXNIP/TOMM7
GO:0010970	transport along microtubule	22/1382	143/17913	0.00141139	0.0116539	22	MAP1B/DST/TMEM108/DYNC2H1/MAP1A/HSPB1/FEZ1/BAG3/APP/ARL3/ARHGAP21/SOD1/DYNLL1/IFT43/PURA/SUN1/IFT57/KIFAP3/TRIP11/KIF1C/UBB/DYNLRB1
GO:0099111	microtubule-based transport	22/1382	143/17913	0.00141139	0.0116539	22	MAP1B/DST/TMEM108/DYNC2H1/MAP1A/HSPB1/FEZ1/BAG3/APP/ARL3/ARHGAP21/SOD1/DYNLL1/IFT43/PURA/SUN1/IFT57/KIFAP3/TRIP11/KIF1C/UBB/DYNLRB1
GO:0002262	myeloid cell homeostasis	22/1382	145/17913	0.00169435	0.0135086	22	EPAS1/AXL/RBFOX2/KITLG/JAM3/MAFB/HSPA1B/THRA/PRDX1/NFE2L1/TMEM14C/SMAD5/SOD1/ZFP36L1/HSPA1A/PRMT1/RPS19/VEGFA/INHBA/KLF2/ZFP36/RPS17
GO:0140053	mitochondrial gene expression	22/1382	148/17913	0.00220876	0.0166541	22	GADD45GIP1/MRPL32/MRPS26/MRPL18/MRPL34/MRPL43/MRPL27/MRPL40/MRPS21/CHCHD10/MRPL17/MRPL36/MRPL33/MRPL41/C1QBP/MRPS36/MRPL20/MRPL14/MRPS6/MRPS15/MRPL11/MRPL3
GO:0006754	ATP biosynthetic process	22/1382	150/17913	0.00262064	0.0190863	22	NUPR1/ZBTB20/IGF1/ATP5MC3/ATP5PF/LDHA/TPI1/STOML2/ATP5MC1/EIF6/PKM/ATP5F1C/UQCC3/PFKP/PGAM1/ATP5PO/ATP5F1D/ATP5F1B/ATP5MF/ATP5ME/DDIT4/ENO1
GO:0048015	phosphatidylinositol-mediated signaling	22/1382	160/17913	0.00577813	0.0349772	22	DCN/SERPINE2/FGFR1/PDGFRB/PDGFRA/NTRK2/AGT/TWIST1/ANGPT1/UNC5B/PTPN13/SOX9/PDGFA/EGFR/PTK2/KLF4/GSN/ZFP36L1/IGF1/MYDGF/NOP53/C1QBP
GO:0098727	maintenance of cell number	22/1382	160/17913	0.00577813	0.0349772	22	PTN/PRRX1/HES1/SFRP1/YAP1/SOX9/JAG1/SOX4/PBX1/SAV1/KLF4/IGF1/POLR2F/CTNNB1/TRIM8/POLR2H/KLF10/POLR2E/POLR2I/LBH/POLR2L/POLR2K
GO:0048017	inositol lipid-mediated signaling	22/1382	163/17913	0.00718395	0.0420223	22	DCN/SERPINE2/FGFR1/PDGFRB/PDGFRA/NTRK2/AGT/TWIST1/ANGPT1/UNC5B/PTPN13/SOX9/PDGFA/EGFR/PTK2/KLF4/GSN/ZFP36L1/IGF1/MYDGF/NOP53/C1QBP
GO:0008154	actin polymerization or depolymerization	22/1382	170/17913	0.0115678	0.0596311	22	CXCL12/DSTN/EPS8/PLEKHH2/SLIT2/CTTN/CDC42EP5/NCKAP1/PFN2/LMOD1/WASF3/SCIN/KIRREL1/LIMA1/ABI2/ANG/MYO1C/WASL/GSN/CFL2/RDX/SNX9
GO:0042594	response to starvation	22/1382	174/17913	0.0149052	0.0720872	22	GAS6/FSTL1/SFRP1/PDK4/SSTR2/COMT/JUN/ATF3/BMPR2/AKR1C3/CDKN1A/RRAGA/DAP/DNAJC15/IFI16/KLF10/HSPA8/HNRNPA1/HSPA5/EIF2A/ZFP36/EIF4EBP1
GO:0016525	negative regulation of angiogenesis	22/1382	177/17913	0.0178753	0.0826242	22	DCN/SPARC/SERPINF1/FOXC1/PTN/EMILIN1/SULF1/AGT/COL4A2/HSPG2/NGFR/THBS2/SPRED1/ADAMTS9/THBS1/KLF4/EPN2/ROCK2/CTNNB1/ANGPT2/SARS/KLF2
GO:2000181	negative regulation of blood vessel morphogenesis	22/1382	179/17913	0.0201	0.0898596	22	DCN/SPARC/SERPINF1/FOXC1/PTN/EMILIN1/SULF1/AGT/COL4A2/HSPG2/NGFR/THBS2/SPRED1/ADAMTS9/THBS1/KLF4/EPN2/ROCK2/CTNNB1/ANGPT2/SARS/KLF2
GO:0070374	positive regulation of ERK1 and ERK2 cascade	22/1382	186/17913	0.0296135	0.119162	22	APOE/PLA2G2A/LRP1/PDGFRB/GAS6/CAVIN3/PDGFRA/ACKR3/ANGPT1/NRP1/PDGFA/FGFR3/EGFR/NPNT/GPNMB/AKAP12/APP/JUN/MIF/SHC1/PHB/PHB2
GO:0006403	RNA localization	22/1382	208/17913	0.0814921	0.237219	22	MYO1C/ZFP36L1/PURA/MRPL18/CCT3/RAN/SSB/PHAX/CCT7/EIF5A/NHP2/RTRAF/CCT4/TCP1/CCT6A/RFTN1/HNRNPA1/CCT2/CCT8/SRSF7/ZFP36/CCT5
GO:0070663	regulation of leukocyte proliferation	22/1382	214/17913	0.102467	0.277161	22	VCAM1/HES1/CSF1/KITLG/PDE5A/CD276/GPNMB/TWSG1/SDC4/CD81/IL6ST/PAWR/IGF1/CDKN1A/GSTP1/LGALS3/MIF/MEF2C/CTNNB1/IGFBP2/RPS3/AHR
GO:0009755	hormone-mediated signaling pathway	22/1382	216/17913	0.110158	0.289842	22	PMEPA1/NR2F2/SFRP1/TGFB1I1/RBFOX2/YAP1/SSTR2/KANK2/DAB2/PLPP1/THRA/FHL2/PARK7/CALR/CTNNB1/RWDD1/PHB/RAN/NR4A1/FKBP4/PHB2/LBH
GO:0016358	dendrite development	22/1382	216/17913	0.110158	0.289842	22	APOE/ID1/PTN/SDC2/BMP5/RBFOX2/FARP1/NRP1/PTPRD/PRKG1/DCLK1/CAMSAP2/ABI2/ITGB1/APP/PDLIM5/WASL/ILK/MEF2C/TMEM106B/MEF2A/ARF4
GO:0051924	regulation of calcium ion transport	22/1382	244/17913	0.252827	0.490216	22	CXCL12/PDGFRB/CAV1/THY1/GJA1/S100A1/GEM/AGT/PLN/ANK2/MYLK/AHNAK/CCL2/RRAD/CAMK2D/YWHAE/SESTD1/LGALS3/CTNNB1/SRI/CALM2/GSTO1
GO:0022409	positive regulation of cell-cell adhesion	22/1382	251/17913	0.297115	0.537982	22	LGALS1/VCAM1/CAV1/THY1/PLPP3/MDK/HES1/PDPN/CD276/CD81/MYO10/IL6ST/CCL2/AFDN/BAD/IGF1/KIFAP3/SMAD7/IGFBP2/YES1/HSPD1/RPS3
GO:0007204	positive regulation of cytosolic calcium ion concentration	22/1382	255/17913	0.323503	0.563562	22	LRP1/CAV1/THY1/PDGFRA/GJA1/PTH1R/C1QTNF1/AGT/PLN/EDNRA/SYNPO/ANK2/S1PR3/ITGAV/PKD1/CAMK2D/FIS1/ABL2/SRI/CALM2/GSTO1/TGM2
GO:0051091	positive regulation of DNA-binding transcription factor activity	22/1382	257/17913	0.336938	0.580758	22	CLU/CAV1/PLPP3/DDR2/AGT/HSPA1B/SAV1/APP/ARID5B/PARK7/NPM1/HSPA1A/CTNNB1/TRIM8/SPHK1/RWDD1/PRDX3/PHB2/RPS27A/UBB/VEGFA/RPS3
GO:0051251	positive regulation of lymphocyte activation	22/1382	258/17913	0.343708	0.589501	22	LGALS1/VCAM1/GAS6/CAV1/THY1/MDK/HES1/AXL/MMP14/CD276/CD81/IL6ST/CCL2/BAD/IGF1/CDKN1A/MIF/MEF2C/IGFBP2/YES1/HSPD1/RPS3
GO:0000082	G1/S transition of mitotic cell cycle	22/1382	269/17913	0.419809	0.666536	22	ID4/ADAMTS1/FHL1/CCND1/EGFR/GPNMB/KANK2/SOX4/ITGB1/KLF4/PKD1/CCL2/MYC/RDX/CDKN1A/BCAT1/PRMT1/RPS27L/RPL26/INHBA/GADD45A/EIF4EBP1
GO:0009416	response to light stimulus	22/1382	307/17913	0.672976	0.840869	22	PTN/CCND1/SCARA3/MAPK10/SYNPO/EGFR/ITGB1/APP/SLC1A3/SDF4/MYC/CRIP1/CDKN1A/NPM1/CIRBP/RPL26/ERCC1/DYNLRB1/COPS9/FOS/METAP2/BHLHE40
GO:0000280	nuclear division	22/1382	357/17913	0.889918	0.956004	22	PDGFRB/CDKN1C/EPS8/CAV2/P3H4/HSPA1B/NFE2L1/BOD1/IGF1/SUN1/HSPA1A/CHMP5/CALR/RPL24/SPHK1/RAN/PSMG2/PHB2/UBB/FLNA/CENPX/CDC26
GO:0046486	glycerolipid metabolic process	22/1382	385/17913	0.948505	0.981753	22	APOE/PLA2G2A/PDGFRB/CAV1/LPL/PTPN13/ENPP2/PDGFA/PLEKHA4/ANG/MGLL/DBI/MTMR2/PRDX6/CAPN2/HADHB/INSIG2/DPM3/PIGP/STOML2/PYURF/HADHA
GO:0061418	regulation of transcription from RNA polymerase II promoter in response to hypoxia	21/1382	77/17913	2.22905e-07	8.20321e-06	21	EPAS1/EGR1/PSMB5/PSMC3/PSMB6/PSMB1/PSMD8/RPS27A/UBB/ELOC/VEGFA/PSMD2/PSMA3/PSMC5/PSMD3/PSMB7/PSMC1/PSMA2/PSMA1/PSMC4/PSME2
GO:0034446	substrate adhesion-dependent cell spreading	21/1382	86/17913	1.63713e-06	4.52615e-05	21	FN1/FBLN1/MDK/FERMT2/AXL/PDPN/PARVA/NRP1/LAMC1/ANTXR1/LAMB1/DOCK1/EFNA5/PTK2/ITGAV/S100A10/ILK/ITGA8/CALR/C1QBP/FLNA
GO:0070167	regulation of biomineral tissue development	21/1382	88/17913	2.44152e-06	6.25232e-05	21	MGP/BGLAP/GAS6/PTN/GJA1/DDR2/ASPN/ENPP1/OMD/FAM20C/TWIST1/TMEM119/SOX9/HEY2/COMP/GPM6B/ROCK2/BMPR2/ANKH/MEF2C/ATRAID
GO:1901655	cellular response to ketone	21/1382	91/17913	4.33231e-06	0.000102445	21	SERPINF1/TNC/ERRFI1/SFRP1/AKR1C2/PTGFR/EGFR/EFNA5/KLF9/KLF4/ADCY3/FBXO32/ROCK2/SPP1/AKR1C3/PARK7/RWDD1/KLF2/AHR/DDIT4/EIF4EBP1
GO:0072080	nephron tubule development	21/1382	93/17913	6.24686e-06	0.000138302	21	HES1/PGF/AGT/WWTR1/IRX3/YAP1/SOX9/FOXD1/NPNT/SIX1/JAG1/PBX1/LZTS2/AHI1/PKD1/MAGED1/ILK/MYC/MEF2C/CTNNB1/VEGFA
GO:2001237	negative regulation of extrinsic apoptotic signaling pathway	21/1382	100/17913	2.04845e-05	0.000369586	21	LMNA/BMP5/CTTN/UNC5B/NRP1/SNAI2/YAP1/TCF7L2/HSPA1B/ITGAV/THBS1/CTNNA1/IGF1/GSTP1/LGALS3/PARK7/HSPA1A/PRDX2/COL2A1/PEA15/IFI6
GO:0070498	interleukin-1-mediated signaling pathway	21/1382	101/17913	2.40077e-05	0.000413037	21	IL1R1/EGR1/PSMB5/PSMC3/PSMB6/PSMB1/SKP1/PSMD8/RPS27A/SQSTM1/UBB/PSMD2/PSMA3/PSMC5/PSMD3/PSMB7/PSMC1/PSMA2/PSMA1/PSMC4/PSME2
GO:0014812	muscle cell migration	21/1382	103/17913	3.27267e-05	0.000524098	21	IGFBP5/TPM1/LRP1/PDGFRB/MDK/ADAMTS1/SLIT2/AGT/PARVA/NRP1/PDGFA/PRKG1/SIX1/IGFBP3/PDGFD/NET1/ILK/IGF1/GSTP1/MEF2C/AAMP
GO:0045446	endothelial cell differentiation	21/1382	105/17913	4.41785e-05	0.000690446	21	ID1/PTN/NR2F2/PDPN/TJP1/NRP1/GSTM3/HEY2/JAG1/S1PR3/CLIC4/COL18A1/ENG/AFDN/ROCK2/BMPR2/TNFRSF1A/RDX/CTNNB1/EDF1/ZEB1
GO:1903828	negative regulation of cellular protein localization	21/1382	112/17913	0.000117599	0.00158616	21	APOD/TMEM98/ANGPT1/DCLK1/MAP1A/DAB2/OTUD7B/BAG3/LZTS2/GPM6B/LEPROT/PKIG/ROCK2/PARK7/TMEM59/LMAN1/ERLEC1/OS9/MDFIC/AP2M1/DNAJA1
GO:0001736	establishment of planar polarity	21/1382	123/17913	0.000450454	0.00464273	21	SFRP1/INTU/DAB2/PSMB5/CTHRC1/RYK/PSMC3/PSMB6/PSMB1/PSMD8/PSMD2/AP2M1/PSMA3/PSMC5/PSMD3/PSMB7/PSMC1/PSMA2/PSMA1/PSMC4/PSME2
GO:0007164	establishment of tissue polarity	21/1382	123/17913	0.000450454	0.00464273	21	SFRP1/INTU/DAB2/PSMB5/CTHRC1/RYK/PSMC3/PSMB6/PSMB1/PSMD8/PSMD2/AP2M1/PSMA3/PSMC5/PSMD3/PSMB7/PSMC1/PSMA2/PSMA1/PSMC4/PSME2
GO:0034620	cellular response to unfolded protein	21/1382	123/17913	0.000450454	0.00464273	21	LMNA/CCND1/BAG3/KDELR3/CCL2/ATF3/ACADVL/MYDGF/YIF1A/HSPA1A/SHC1/CALR/SEC31A/PDIA6/RACK1/MBTPS1/OPTN/STUB1/HSPA5/PPP1R15A/HSP90B1
GO:0042177	negative regulation of protein catabolic process	21/1382	124/17913	0.000503649	0.00503377	21	TIMP1/SERPINE2/TIMP3/EGFR/MAP1A/CST3/ANXA2/LAPTM4B/HSP90AB1/RPL5/PARK7/ATRAID/ERLEC1/CAMLG/PHB/RPL11/OS9/NOP53/SNRNP70/FLNA/UBXN1
GO:0032543	mitochondrial translation	21/1382	125/17913	0.000562221	0.00554931	21	GADD45GIP1/MRPL32/MRPS26/MRPL18/MRPL34/MRPL43/MRPL27/MRPL40/MRPS21/MRPL17/MRPL36/MRPL33/MRPL41/C1QBP/MRPS36/MRPL20/MRPL14/MRPS6/MRPS15/MRPL11/MRPL3
GO:0014065	phosphatidylinositol 3-kinase signaling	21/1382	138/17913	0.00205475	0.0157888	21	DCN/SERPINE2/FGFR1/PDGFRB/PDGFRA/NTRK2/AGT/TWIST1/ANGPT1/UNC5B/PTPN13/SOX9/PDGFA/EGFR/PTK2/KLF4/ZFP36L1/IGF1/MYDGF/NOP53/C1QBP
GO:0010212	response to ionizing radiation	21/1382	144/17913	0.00346654	0.0238706	21	CRYAB/VCAM1/CCND1/SFRP1/SNAI2/YAP1/RHOB/EGR1/NET1/NUCKS1/MAP3K20/MYC/MGMT/CDKN1A/TMEM109/GTF2H5/IFI16/RPL26/ERCC1/HSPA5/GADD45A
GO:0048592	eye morphogenesis	21/1382	145/17913	0.00376667	0.0253407	21	COL5A2/FBN1/PTN/THY1/NTRK2/COL5A1/COL8A1/EFEMP1/RBP4/TWIST1/SOX9/TBX2/ALDH1A3/FAT1/JAG1/ABI2/C12orf57/AHI1/CTNNB1/ZEB1/VEGFA
GO:0030168	platelet activation	21/1382	152/17913	0.00653171	0.0389032	21	COL1A1/COL1A2/COL3A1/APOE/MYL9/SERPINE2/GAS6/PDGFRA/C1QTNF1/PDPN/PDGFA/PRKG1/CSRP1/CD9/HSPB1/COMP/STXBP1/ILK/GNAS/FLNA/ACTG1
GO:0007519	skeletal muscle tissue development	21/1382	156/17913	0.00874488	0.0485324	21	DCN/NUPR1/CAV1/NR2F2/CAV2/TWIST1/SIX1/SHOX2/GPC1/EGR1/S100B/YBX3/ATF3/CFL2/MYL6B/VAMP5/FLNB/MEF2C/CTNNB1/EEF2/FOS
GO:0019827	stem cell population maintenance	21/1382	158/17913	0.0100598	0.0541689	21	PTN/PRRX1/HES1/SFRP1/YAP1/SOX9/JAG1/SOX4/PBX1/SAV1/KLF4/POLR2F/CTNNB1/TRIM8/POLR2H/KLF10/POLR2E/POLR2I/LBH/POLR2L/POLR2K
GO:0060538	skeletal muscle organ development	21/1382	165/17913	0.0159604	0.0749719	21	DCN/NUPR1/CAV1/NR2F2/CAV2/TWIST1/SIX1/SHOX2/GPC1/EGR1/S100B/YBX3/ATF3/CFL2/MYL6B/VAMP5/FLNB/MEF2C/CTNNB1/EEF2/FOS
GO:0009566	fertilization	21/1382	170/17913	0.0216319	0.0948017	21	MFGE8/NR2F2/HOXA10/CD9/CLIC4/STXBP1/ADCY3/YBX3/NECTIN2/PARK7/CCT3/VDAC2/CCT7/SLIRP/CCT4/TCP1/HEXB/CCT2/CCT8/SNU13/CCT5
GO:0097529	myeloid leukocyte migration	21/1382	170/17913	0.0216319	0.0948017	21	CXCL12/RARRES2/MDK/NBL1/EMILIN1/MMP14/SLIT2/CSF1/JAM3/IL1R1/CD9/ITGA1/CD81/THBS1/CCL2/PDGFD/LGALS3/MIF/RPS19/C1QBP/JAGN1
GO:0010921	regulation of phosphatase activity	21/1382	171/17913	0.0229328	0.0996116	21	PDGFRB/PTN/FARP1/RCAN2/NPNT/IGFBP3/SPRED1/ITGA1/MYO1D/PPP1R14A/BOD1/ROCK2/HSP90AB1/LGALS3/MEF2C/RCAN1/CALM2/PPP1R14B/PPP1R15A/HSP90B1/SET
GO:0006888	ER to Golgi vesicle-mediated transport	21/1382	172/17913	0.024293	0.10227	21	BGLAP/GAS6/COPZ2/GAS1/ANK2/DYNLL1/CD59/DYNC1I2/KDELR1/MCFD2/LMAN1/TFG/SEC31A/DYNC1LI2/TMED9/TMED10/DCTN2/USO1/ARF4/TMED2/DCTN6
GO:0043401	steroid hormone mediated signaling pathway	21/1382	181/17913	0.0394625	0.144367	21	PMEPA1/NR2F2/SFRP1/TGFB1I1/RBFOX2/YAP1/KANK2/DAB2/PLPP1/THRA/FHL2/PARK7/CALR/CTNNB1/RWDD1/PHB/RAN/NR4A1/FKBP4/PHB2/LBH
GO:1905475	regulation of protein localization to membrane	21/1382	181/17913	0.0394625	0.144367	21	LRP1/PTN/MMP14/EPHA3/EGFR/DAB2/CD81/ITGB1/MYO1C/GSN/YWHAE/BAD/YWHAQ/PDCD5/LGALS3/TMEM59/FIS1/RER1/RACK1/SQSTM1/AP2M1
GO:0050731	positive regulation of peptidyl-tyrosine phosphorylation	21/1382	184/17913	0.0458072	0.161315	21	GAS6/FGF7/HES1/NTRK2/AGT/ANGPT1/NRP1/KITLG/ENPP2/GHR/FGFR3/CSPG4/EFNA5/CD81/IL6ST/SOCS3/TNFRSF1A/IGF1/MIF/YES1/VEGFA
GO:0050866	negative regulation of cell activation	21/1382	187/17913	0.0528582	0.177438	21	APOE/SERPINE2/PDGFRA/MDK/EMILIN1/C1QTNF1/SFRP1/AXL/CYGB/PDGFA/PRKG1/PDE5A/GPNMB/CD9/TWSG1/SDC4/PAWR/LGALS3/PRDX2/SMAD7/INHBA
GO:0035637	multicellular organismal signaling	21/1382	193/17913	0.0692053	0.21177	21	CAV1/FXYD1/GJA1/NTRK2/AGT/PLN/ANK2/JAM3/ASPH/FXYD6/SOD1/CAMK2D/YWHAE/AHCYL1/MEF2A/SRI/CALM2/ATP2A2/ATP1A1/FLNA/AKAP9
GO:0046578	regulation of Ras protein signal transduction	21/1382	215/17913	0.156842	0.371969	21	COL3A1/APOE/PDGFRB/CSF1/FARP1/DLC1/NRP1/KITLG/PSD3/ARHGEF17/KANK2/ITGB1/TIMP2/NET1/PPP2CB/ARHGEF12/IGF1/RDX/SHC1/ABL2/SQSTM1
GO:0034249	negative regulation of cellular amide metabolic process	21/1382	217/17913	0.166984	0.390378	21	CLU/APOE/IGFBP5/ANG/ZFP36L1/ROCK2/PURA/IGF1/CALR/SPHK1/CIRBP/RACK1/EIF6/SNRNP70/TOB1/NCL/RPS3/HNRNPR/RPL13A/ZFP36/EIF4EBP1
GO:0050807	regulation of synapse organization	21/1382	218/17913	0.172184	0.396472	21	APOE/SPARC/PTN/NTRK2/NRP2/FLRT2/PTPRD/TPBG/THBS2/EFNA5/SIX1/ABI2/PTK2/APP/PDLIM5/MEF2C/CLSTN1/TUBB/TUBA1A/ARF4/HSPA8
GO:0032872	regulation of stress-activated MAPK cascade	21/1382	220/17913	0.182839	0.403669	21	SFRP1/FZD8/SASH1/EGFR/LTBR/APP/PRDX1/GADD45B/HACD3/MAP3K20/MYC/GSTP1/PRMT1/SPHK1/STK25/MDFIC/ARL6IP5/VEGFA/RPS3/DNAJA1/GADD45A
GO:0050803	regulation of synapse structure or activity	21/1382	222/17913	0.193823	0.424213	21	APOE/SPARC/PTN/NTRK2/NRP2/FLRT2/PTPRD/TPBG/THBS2/EFNA5/SIX1/ABI2/PTK2/APP/PDLIM5/MEF2C/CLSTN1/TUBB/TUBA1A/ARF4/HSPA8
GO:0070302	regulation of stress-activated protein kinase signaling cascade	21/1382	222/17913	0.193823	0.424213	21	SFRP1/FZD8/SASH1/EGFR/LTBR/APP/PRDX1/GADD45B/HACD3/MAP3K20/MYC/GSTP1/PRMT1/SPHK1/STK25/MDFIC/ARL6IP5/VEGFA/RPS3/DNAJA1/GADD45A
GO:0043122	regulation of I-kappaB kinase/NF-kappaB signaling	21/1382	224/17913	0.205128	0.433071	21	LGALS1/S100A13/RHOC/GJA1/ANGPT1/HSPB1/OTUD7B/LTBR/S100B/TNFRSF1A/GSTP1/CTNNB1/NDFIP1/TFG/TRIM8/CXXC5/OPTN/SQSTM1/DDX1/TGM2/FLNA
GO:0018105	peptidyl-serine phosphorylation	21/1382	231/17913	0.24704	0.483928	21	GAS6/CAV1/NTRK2/ANGPT1/PFN2/EGFR/DCLK1/APP/PKD1/CAMK2D/ROCK2/HSP90AB1/ILK/MIF/PARK7/RACK1/SMAD7/HSP90AA1/VEGFA/AKAP9/DDIT4
GO:0032412	regulation of ion transmembrane transporter activity	21/1382	234/17913	0.266016	0.499578	21	CAV1/FXYD1/S100A1/FHL1/GEM/PLN/ANK2/APP/AHNAK/CCL2/RRAD/CAMK2D/YWHAE/MEF2C/AHCYL1/CHCHD10/SRI/CALM2/PHB2/GSTO1/AKAP9
GO:0031348	negative regulation of defense response	21/1382	237/17913	0.285525	0.52713	21	APOE/SERPINF1/HTRA1/SERPING1/APOD/MDK/A2M/NT5E/PTGIS/SOCS3/KLF4/SOD1/TNFRSF1A/IGF1/GSTP1/IFI16/CUEDC2/RPS19/C1QBP/TNFAIP6/PSMA1
GO:1901617	organic hydroxy compound biosynthetic process	21/1382	241/17913	0.312268	0.555465	21	APOE/PTH1R/BMP5/DKK3/SNAI2/PLTP/ISYNA1/CYB5R3/SNAI1/SOD1/AKR1C3/PARK7/SPHK1/CES1/PTS/INSIG2/ACAA2/RAN/MBTPS1/CNBP/FDPS
GO:0051188	cofactor biosynthetic process	21/1382	310/17913	0.764268	0.890974	21	NNMT/GGT5/NUPR1/PDK4/BDH2/PTGIS/NFE2L1/TMEM14C/SOD1/ZBTB20/IGF1/LDHA/PTS/TPI1/EIF6/PKM/MPC1/PFKP/PGAM1/DDIT4/ENO1
GO:0045669	positive regulation of osteoblast differentiation	20/1382	67/17913	8.38958e-08	3.42801e-06	20	ID4/GJA1/DDR2/FAM20C/TMEM119/NPNT/JAG1/RUNX2/IL6ST/CEBPD/SMAD5/CTHRC1/BMPR2/ILK/IGF1/MEF2C/ATRAID/CTNNB1/GNAS/IFITM1
GO:1903391	regulation of adherens junction organization	20/1382	67/17913	8.38958e-08	3.42801e-06	20	APOD/LRP1/THY1/SFRP1/MMP14/LIMCH1/DLC1/NRP1/COL16A1/EPHA3/EFNA5/SDC4/PTK2/THBS1/GPM6B/S100A10/PHLDB2/ROCK2/RDX/VEGFA
GO:0034109	homotypic cell-cell adhesion	20/1382	77/17913	1.01062e-06	3.01938e-05	20	MYL9/LGALS1/SERPINE2/GAS6/PDGFRA/PLPP3/C1QTNF1/PDPN/PRKG1/ZNF703/CSRP1/CD9/HSPB1/COMP/STXBP1/ILK/RDX/GNAS/FLNA/ACTG1
GO:0003151	outflow tract morphogenesis	20/1382	80/17913	1.94041e-06	5.28572e-05	20	FOXC1/HES1/NRP2/FOXC2/TWIST1/PARVA/NRP1/TBX2/HEY2/SIX1/JAG1/ENG/JUN/BMPR2/DHRS3/ILK/MEF2C/CTNNB1/PLXND1/VEGFA
GO:0070125	mitochondrial translational elongation	20/1382	86/17913	6.42418e-06	0.000140949	20	GADD45GIP1/MRPL32/MRPS26/MRPL18/MRPL34/MRPL43/MRPL27/MRPL40/MRPS21/MRPL17/MRPL36/MRPL33/MRPL41/MRPS36/MRPL20/MRPL14/MRPS6/MRPS15/MRPL11/MRPL3
GO:0070126	mitochondrial translational termination	20/1382	88/17913	9.30352e-06	0.000188685	20	GADD45GIP1/MRPL32/MRPS26/MRPL18/MRPL34/MRPL43/MRPL27/MRPL40/MRPS21/MRPL17/MRPL36/MRPL33/MRPL41/MRPS36/MRPL20/MRPL14/MRPS6/MRPS15/MRPL11/MRPL3
GO:0001656	metanephros development	20/1382	91/17913	1.58231e-05	0.000296058	20	ID3/PDGFRB/FBN1/PDGFRA/HES1/FOXC2/LAMB2/WWTR1/IRX3/YAP1/SOX9/PDGFA/FOXD1/SIX1/EGR1/PKD1/ITGA8/SPRY1/MYC/CTNNB1
GO:0002474	antigen processing and presentation of peptide antigen via MHC class I	20/1382	95/17913	3.07953e-05	0.000497469	20	ITGB5/PSMB5/ITGAV/CALR/PSMC3/PSMB6/SEC31A/PSMB1/PDIA3/PSMD8/PSMD2/PSMA3/PSMC5/PSMD3/PSMB7/PSMC1/PSMA2/PSMA1/PSMC4/PSME2
GO:0060993	kidney morphogenesis	20/1382	95/17913	3.07953e-05	0.000497469	20	PDGFRB/HES1/PGF/AGT/WWTR1/IRX3/SOX9/FOXD1/NPNT/SIX1/SOX4/PBX1/LZTS2/AHI1/PKD1/MAGED1/ILK/MYC/CTNNB1/VEGFA
GO:2000278	regulation of DNA biosynthetic process	20/1382	106/17913	0.000154881	0.00202512	20	PDGFRB/GJA1/SMOC2/KLF4/BMPR2/HSP90AB1/MYC/CDKN1A/CTNNB1/CCT3/PTGES3/CCT7/HSP90AA1/CCT4/TCP1/CCT6A/HNRNPA1/CCT2/CCT8/CCT5
GO:0006024	glycosaminoglycan biosynthetic process	20/1382	107/17913	0.000176904	0.00224955	20	DCN/LUM/BGN/PRELP/FMOD/PDGFRB/ACAN/OGN/SDC2/OMD/ANGPT1/HSPG2/CSPG4/DSEL/CHST3/GPC1/UGDH/SDC4/VCAN/EXT2
GO:0060071	Wnt signaling pathway, planar cell polarity pathway	20/1382	107/17913	0.000176904	0.00224955	20	SFRP1/DAB2/PSMB5/CTHRC1/RYK/PSMC3/PSMB6/PSMB1/PSMD8/PSMD2/AP2M1/PSMA3/PSMC5/PSMD3/PSMB7/PSMC1/PSMA2/PSMA1/PSMC4/PSME2
GO:0006023	aminoglycan biosynthetic process	20/1382	108/17913	0.000201633	0.00251228	20	DCN/LUM/BGN/PRELP/FMOD/PDGFRB/ACAN/OGN/SDC2/OMD/ANGPT1/HSPG2/CSPG4/DSEL/CHST3/GPC1/UGDH/SDC4/VCAN/EXT2
GO:0008543	fibroblast growth factor receptor signaling pathway	20/1382	109/17913	0.000229346	0.00272908	20	FGFR1/FGF7/FAM20C/SULF1/SMOC2/RBFOX2/FLRT2/FGFR3/GPC1/SPRED1/RUNX2/THBS1/POLR2F/CTNNB1/POLR2H/POLR2E/POLR2I/POLR2L/HNRNPA1/POLR2K
GO:0090175	regulation of establishment of planar polarity	20/1382	109/17913	0.000229346	0.00272908	20	SFRP1/DAB2/PSMB5/CTHRC1/RYK/PSMC3/PSMB6/PSMB1/PSMD8/PSMD2/AP2M1/PSMA3/PSMC5/PSMD3/PSMB7/PSMC1/PSMA2/PSMA1/PSMC4/PSME2
GO:0046660	female sex differentiation	20/1382	114/17913	0.000423974	0.00448767	20	FOXC1/NUPR1/PDGFRA/ADAMTS1/SFRP1/AXL/RBP4/MMP14/SLIT2/SLIT3/KITLG/ANG/ARID5B/SOD1/CTNNA1/PHB/UBB/VEGFA/INHBA/HSPA5
GO:0043280	positive regulation of cysteine-type endopeptidase activity involved in apoptotic process	20/1382	118/17913	0.000670568	0.00644697	20	BEX3/DLC1/NGFR/GSN/BAD/MYC/PDCD5/IFT57/MTCH1/FAM162A/FIS1/DAP/RPS27L/RACK1/HSPE1/ARL6IP5/HSPD1/NDUFA13/RPS3/CYCS
GO:0051170	import into nucleus	20/1382	125/17913	0.00140321	0.0116434	20	LMNA/APOD/AGT/ANGPT1/BAG3/PKIG/PTTG1IP/CDKN1A/RAN/MBTPS1/MDFIC/PHB2/SNRPE/CBLB/FLNA/HNRNPA1/TXNIP/SNRPD1/SNRPF/SNRPD2
GO:0045471	response to ethanol	20/1382	127/17913	0.00170907	0.0136065	20	SPARC/TNC/VCAM1/BGLAP/CDO1/EPS8/CCND1/RBP4/SOD1/GSN/SDF4/BAD/MGMT/SETD7/GSTP1/RPL10A/EEF2/PHB/TUFM/EIF4EBP1
GO:0008037	cell recognition	20/1382	129/17913	0.00206971	0.0157986	20	CRTAC1/MFGE8/COLEC12/NDN/NRP1/EPHA3/CD9/CADM1/CD81/VCAN/APP/LGALS3/CCT3/VDAC2/CCT7/CCT4/TCP1/CCT2/CCT8/CCT5
GO:0003231	cardiac ventricle development	20/1382	131/17913	0.00249261	0.0182978	20	TPM1/CPE/FOXC1/COL11A1/HES1/LTBP1/FOXC2/SLIT2/SLIT3/HEY2/JAG1/SMARCD3/SOX4/SAV1/ENG/BMPR2/LMO4/MEF2C/TRIP11/SMAD7
GO:0060041	retina development in camera-type eye	20/1382	136/17913	0.00387725	0.0260531	20	SERPINF1/CYP1B1/PDGFRB/PTN/THY1/PDGFRA/NTRK2/RBP4/COL4A1/LAMB2/NRP1/SOX9/SMARCD3/CLIC4/AHI1/MYH10/BMPR2/RPL24/IMPDH2/PFDN5
GO:0045807	positive regulation of endocytosis	20/1382	141/17913	0.00584846	0.0353644	20	CLU/APOE/SFRP4/LRP1/GAS6/MFGE8/CD151/TF/AXL/ANGPT1/DAB2/ANXA2/CD63/ITGAV/AHI1/CCL2/SOD1/WASL/CALR/VEGFA
GO:0035148	tube formation	20/1382	144/17913	0.0073821	0.0428802	20	SFRP1/BMP5/NFIB/TWIST1/IRX3/DLC1/SOX9/SIX1/SDC4/SOX4/TULP3/PLXNB2/CTHRC1/LMO4/IFT57/CTNNB1/RALA/TGM2/TMED2/VEGFA
GO:0043271	negative regulation of ion transport	20/1382	144/17913	0.0073821	0.0428802	20	SFRP4/SERPINE2/CAV1/GEM/TWIST1/PLN/PLA2R1/THBS1/GPM6B/RRAD/CAMK2D/YWHAE/SESTD1/YWHAQ/ATP5PF/SRI/ARL6IP5/CALM2/ISCU/GSTO1
GO:0016331	morphogenesis of embryonic epithelium	20/1382	146/17913	0.00857523	0.047844	20	SFRP1/SULF1/BMP5/TGFB1I1/TWIST1/IRX3/DLC1/SOX9/ALDH1A3/SIX1/SDC4/SOX4/TULP3/PLXNB2/CTHRC1/LMO4/IFT57/CTNNB1/RALA/TMED2
GO:0043524	negative regulation of neuron apoptotic process	20/1382	146/17913	0.00857523	0.047844	20	LRP1/MDK/CHL1/NTRK2/AXL/ANGPT1/UNC5B/NRP1/NDNF/SIX1/STXBP1/RETREG1/CCL2/SOD1/JUN/HSP90AB1/ILK/PARK7/MEF2C/SET
GO:0008064	regulation of actin polymerization or depolymerization	20/1382	147/17913	0.00922769	0.0506202	20	CXCL12/DSTN/EPS8/PLEKHH2/SLIT2/CTTN/CDC42EP5/NCKAP1/PFN2/LMOD1/SCIN/KIRREL1/LIMA1/ABI2/MYO1C/WASL/GSN/CFL2/RDX/SNX9
GO:0030832	regulation of actin filament length	20/1382	148/17913	0.00991956	0.0535837	20	CXCL12/DSTN/EPS8/PLEKHH2/SLIT2/CTTN/CDC42EP5/NCKAP1/PFN2/LMOD1/SCIN/KIRREL1/LIMA1/ABI2/MYO1C/WASL/GSN/CFL2/RDX/SNX9
GO:0030902	hindbrain development	20/1382	150/17913	0.0114281	0.0593513	20	SERPINE2/FOXC1/PTN/MDK/HES1/BMP5/CKB/NFIB/RBFOX2/DLC1/SSTR2/MAFB/ITGB1/AHI1/MYH10/SDF4/CTNNB1/UQCRQ/FLNA/HSPA5
GO:0007266	Rho protein signal transduction	20/1382	159/17913	0.0206141	0.091642	20	COL1A2/COL3A1/APOE/PDGFRB/PDPN/FARP1/DLC1/NRP1/NGFR/ARHGEF17/RHOB/KANK2/ITGB1/NET1/ROCK2/HACD3/ARHGEF12/CTNNAL1/ARHGAP5/ABL2
GO:0003018	vascular process in circulatory system	20/1382	161/17913	0.0232716	0.100482	20	APOE/ACTA2/FOXC1/CAV1/GJA1/FOXC2/SLIT2/AGT/ANGPT1/EDNRA/PRKG1/EGFR/AKAP12/ITGA1/COMP/SOD1/ROCK2/BMPR2/GUCY1A1/YES1
GO:0031345	negative regulation of cell projection organization	20/1382	166/17913	0.0310597	0.123285	20	APOE/LGALS1/LRP1/ID1/THY1/PMP22/SLIT2/DPYSL3/NRP1/PFN2/NGFR/PTPRG/PTK2/VIM/SPP1/MAP4/RYK/FKBP4/ITM2C/ODF2L
GO:0022408	negative regulation of cell-cell adhesion	20/1382	169/17913	0.0365851	0.136445	20	CXCL12/SERPINE2/MDK/C1QTNF1/SNAI2/PRKG1/PDE5A/ZNF703/GPNMB/JAG1/CD9/TWSG1/SDC4/PTK2/PAWR/KLF4/RDX/LGALS3/PRDX2/SMAD7
GO:0038095	Fc-epsilon receptor signaling pathway	20/1382	169/17913	0.0365851	0.136445	20	MAPK10/PSMB5/JUN/SHC1/PSMC3/PSMB6/PSMB1/SKP1/PSMD8/PSMD2/PSMA3/PSMC5/PSMD3/PSMB7/PSMC1/PSMA2/PSMA1/FOS/PSMC4/PSME2
GO:1901136	carbohydrate derivative catabolic process	20/1382	176/17913	0.0522424	0.176696	20	DCN/LUM/BGN/PRELP/FMOD/ACAN/OGN/SDC2/OMD/HSPG2/NT5E/PDE5A/CSPG4/GPC1/CST3/SDC4/VCAN/ADAMTS9/HEXB/HINT1
GO:0006367	transcription initiation from RNA polymerase II promoter	20/1382	178/17913	0.0574779	0.187664	20	NOTCH3/CCND1/WWTR1/YAP1/SOX9/TEAD1/HEY2/RUNX2/THRA/TCF4/MAML2/CDKN1A/POLR2F/GTF2H5/POLR2H/NR4A1/POLR2E/POLR2I/POLR2L/POLR2K
GO:0002040	sprouting angiogenesis	20/1382	181/17913	0.0660028	0.204333	20	ESM1/S100A1/FOXC2/SLIT2/ANGPT1/PARVA/NRP1/NGFR/ADGRA2/SPRED1/ITGB1/ADAMTS9/THBS1/KLF4/EPN2/AKT3/NR4A1/PKM/VEGFA/KLF2
GO:0043534	blood vessel endothelial cell migration	20/1382	182/17913	0.0690277	0.211343	20	APOE/FGFR1/EMP2/ID1/FOXC2/SLIT2/ANGPT1/NRP1/SPRED1/HSPB1/AMOTL1/ITGB1/THBS1/KLF4/AKT3/MEF2C/ANGPT2/NR4A1/VEGFA/ATP5F1B
GO:0048639	positive regulation of developmental growth	20/1382	183/17913	0.0721458	0.218875	20	FN1/CXCL12/LRP1/FGFR1/MAP1B/CSF1/NRP1/YAP1/TBX2/GHR/HEY2/EFNA5/TNFRSF12A/YBX3/BMPR2/ILK/PPIB/IGF1/MEF2C/VEGFA
GO:0060759	regulation of response to cytokine stimulus	20/1382	183/17913	0.0721458	0.218875	20	GAS6/CAV1/AXL/SLIT2/SLIT3/CSF1/ANGPT1/LIFR/CCDC3/IL1R1/SOCS3/HSPA1B/KLF4/HSP90AB1/TNFRSF1A/GSTP1/HSPA1A/SPPL2A/SPHK1/RACK1
GO:0006109	regulation of carbohydrate metabolic process	20/1382	198/17913	0.130459	0.326411	20	IGFBP5/IGFBP4/LEPR/NUPR1/PTH1R/ENPP1/C1QTNF1/PDK4/IGFBP3/PHLDA2/NFE2L1/SCARB2/ZBTB20/BAD/IGF1/FAM3C/COX11/EIF6/PGAM1/DDIT4
GO:0032944	regulation of mononuclear cell proliferation	20/1382	200/17913	0.139884	0.342588	20	VCAM1/HES1/CSF1/PDE5A/CD276/GPNMB/TWSG1/SDC4/CD81/IL6ST/PAWR/IGF1/CDKN1A/LGALS3/MIF/MEF2C/CTNNB1/IGFBP2/RPS3/AHR
GO:0046777	protein autophosphorylation	20/1382	210/17913	0.192581	0.422117	20	FGFR1/PDGFRB/CAV1/THY1/PDGFRA/ERRFI1/NTRK2/DDR2/ENPP1/PDGFA/FGFR3/EGFR/GPNMB/PTK2/ENG/JUN/CAMK2D/STK25/CALM2/VEGFA
GO:0046434	organophosphate catabolic process	20/1382	224/17913	0.280051	0.522434	20	NUPR1/ENPP1/NT5E/ENPP2/PDE5A/ZBTB20/IGF1/MTMR2/PRDX6/LDHA/TPI1/EIF6/PKM/PFKP/PGAM1/NUDT5/DNPH1/DDIT4/HINT1/ENO1
GO:0030072	peptide hormone secretion	20/1382	241/17913	0.400516	0.648302	20	CPE/LRP1/GJA1/SFRP1/RBP4/EGFR/EFNA5/LTBP4/SOX4/TCF7L2/PHPT1/BAD/ARL2/PARK7/HMGN3/NDUFAF2/SRI/SLC25A6/JAGN1/SLC25A5
GO:0051650	establishment of vesicle localization	20/1382	253/17913	0.488758	0.737185	20	PFN2/BACE1/STXBP1/MYO1C/WASL/CD59/MCFD2/KIFAP3/CTNNB1/KIF1C/TMEM230/LMAN1/TFG/SEC31A/TMED9/TMED10/DCTN2/USO1/ATP2A2/TMED2
GO:0051648	vesicle localization	20/1382	270/17913	0.609029	0.814331	20	PFN2/BACE1/STXBP1/MYO1C/WASL/CD59/MCFD2/KIFAP3/CTNNB1/KIF1C/TMEM230/LMAN1/TFG/SEC31A/TMED9/TMED10/DCTN2/USO1/ATP2A2/TMED2
GO:0090068	positive regulation of cell cycle process	20/1382	283/17913	0.691924	0.856733	20	FGFR1/PDGFRB/ADAMTS1/CCND1/FAP/EGFR/SMARCD3/SOX4/PBX1/APP/ROCK2/IGF1/RDX/CDKN1A/NPM1/PRMT1/SPHK1/PHB2/RPL26/GADD45A
GO:0098542	defense response to other organism	20/1382	481/17913	0.999516	1	20	IFITM3/PLA2G2A/HTRA1/RARRES2/ADAMTS5/BNIP3/TNFRSF1A/ADARB1/SHC1/IFI27/IFI16/OPTN/DDX1/NOP53/RPS19/C1QBP/FLNA/IFI6/JAGN1/DDIT4
GO:0060350	endochondral bone morphogenesis	19/1382	52/17913	4.15718e-09	2.43173e-07	19	COL1A1/FOXC1/SERPINH1/DLX5/MMP14/TMEM119/SOX9/FGFR3/COL27A1/COL13A1/SHOX2/RUNX2/COMP/ALPL/BMPR2/MEF2C/TRIP11/COL2A1/GNAS
GO:0051893	regulation of focal adhesion assembly	19/1382	61/17913	8.26013e-08	3.42801e-06	19	APOD/LRP1/THY1/SFRP1/MMP14/LIMCH1/DLC1/NRP1/COL16A1/EPHA3/EFNA5/SDC4/PTK2/THBS1/GPM6B/S100A10/PHLDB2/ROCK2/VEGFA
GO:0090109	regulation of cell-substrate junction assembly	19/1382	61/17913	8.26013e-08	3.42801e-06	19	APOD/LRP1/THY1/SFRP1/MMP14/LIMCH1/DLC1/NRP1/COL16A1/EPHA3/EFNA5/SDC4/PTK2/THBS1/GPM6B/S100A10/PHLDB2/ROCK2/VEGFA
GO:0007492	endoderm development	19/1382	73/17913	1.81204e-06	4.96034e-05	19	FN1/COL6A1/COL5A2/COL11A1/MMP2/COL5A1/COL12A1/ITGB5/COL8A1/MMP14/COL4A2/LAMC1/LAMB1/ITGA7/ITGAV/ZFP36L1/CTNNB1/HSBP1/INHBA
GO:0002479	antigen processing and presentation of exogenous peptide antigen via MHC class I, TAP-dependent	19/1382	75/17913	2.81418e-06	7.14082e-05	19	ITGB5/PSMB5/ITGAV/CALR/PSMC3/PSMB6/PSMB1/PDIA3/PSMD8/PSMD2/PSMA3/PSMC5/PSMD3/PSMB7/PSMC1/PSMA2/PSMA1/PSMC4/PSME2
GO:0030512	negative regulation of transforming growth factor beta receptor signaling pathway	19/1382	78/17913	5.27012e-06	0.000120251	19	HTRA1/FBN1/CAV1/PMEPA1/EMILIN1/ASPN/LTBP1/VASN/CAV2/TGFB1I1/BAMBI/CD109/HSPA1A/SMAD7/RPS27A/UBB/STUB1/FAM89B/HSPA5
GO:0042590	antigen processing and presentation of exogenous peptide antigen via MHC class I	19/1382	78/17913	5.27012e-06	0.000120251	19	ITGB5/PSMB5/ITGAV/CALR/PSMC3/PSMB6/PSMB1/PDIA3/PSMD8/PSMD2/PSMA3/PSMC5/PSMD3/PSMB7/PSMC1/PSMA2/PSMA1/PSMC4/PSME2
GO:0006029	proteoglycan metabolic process	19/1382	79/17913	6.44251e-06	0.000140949	19	DCN/BGN/ACAN/COL11A1/SULF1/NDNF/CSPG4/DSEL/CHST3/GPC1/UGDH/TCF7L2/VCAN/EXT2/BMPR2/IGF1/CTNNB1/COL2A1/HEXB
GO:0061333	renal tubule morphogenesis	19/1382	79/17913	6.44251e-06	0.000140949	19	HES1/PGF/COL4A1/AGT/IRX3/SOX9/FOXD1/NPNT/SIX1/PBX1/LZTS2/AHI1/PKD1/MAGED1/ILK/MYC/MEF2C/CTNNB1/VEGFA
GO:1903845	negative regulation of cellular response to transforming growth factor beta stimulus	19/1382	80/17913	7.8448e-06	0.000164504	19	HTRA1/FBN1/CAV1/PMEPA1/EMILIN1/ASPN/LTBP1/VASN/CAV2/TGFB1I1/BAMBI/CD109/HSPA1A/SMAD7/RPS27A/UBB/STUB1/FAM89B/HSPA5
GO:0031145	anaphase-promoting complex-dependent catabolic process	19/1382	81/17913	9.51591e-06	0.000191594	19	PSMB5/PSMC3/PSMB6/PSMB1/ANAPC11/PSMD8/RPS27A/UBB/PSMD2/PSMA3/PSMC5/PSMD3/PSMB7/PSMC1/PSMA2/PSMA1/CDC26/PSMC4/PSME2
GO:0048704	embryonic skeletal system morphogenesis	19/1382	85/17913	1.98724e-05	0.00035971	19	COL11A1/PDGFRA/PRRX1/MDFI/FOXC2/MMP14/TWIST1/SATB2/TBX15/SIX1/SHOX2/RUNX2/TULP3/SLC39A1/MEF2C/CTNNB1/COL2A1/ZEB1/GNAS
GO:1901532	regulation of hematopoietic progenitor cell differentiation	19/1382	85/17913	1.98724e-05	0.00035971	19	FOXC1/HES1/YAP1/KITLG/PSMB5/PSMC3/PSMB6/PSMB1/PSMD8/PSMD2/PSMA3/PSMC5/PSMD3/PSMB7/PSMC1/PSMA2/PSMA1/PSMC4/PSME2
GO:0014909	smooth muscle cell migration	19/1382	91/17913	5.43695e-05	0.000823246	19	IGFBP5/TPM1/LRP1/PDGFRB/MDK/ADAMTS1/SLIT2/AGT/PARVA/NRP1/PDGFA/PRKG1/IGFBP3/PDGFD/ILK/IGF1/GSTP1/MEF2C/AAMP
GO:0048010	vascular endothelial growth factor receptor signaling pathway	19/1382	93/17913	7.42729e-05	0.00106375	19	FOXC1/EMILIN1/PGF/NRP2/SULF1/FOXC2/AXL/NRP1/NCKAP1/DOCK1/HSPB1/PTK2/ITGAV/MYOF/VEGFB/EPN2/ROCK2/HSP90AA1/VEGFA
GO:0014897	striated muscle hypertrophy	19/1382	111/17913	0.000798484	0.00745588	19	IGFBP5/LMNA/ERRFI1/SORBS2/AGT/HEY2/PDE5A/PTK2/IL6ST/LMCD1/PDLIM5/CAMK2D/ROCK2/TNFRSF1A/IGF1/MEF2C/MEF2A/ATP2A2/GLRX3
GO:0014896	muscle hypertrophy	19/1382	113/17913	0.000998002	0.00888766	19	IGFBP5/LMNA/ERRFI1/SORBS2/AGT/HEY2/PDE5A/PTK2/IL6ST/LMCD1/PDLIM5/CAMK2D/ROCK2/TNFRSF1A/IGF1/MEF2C/MEF2A/ATP2A2/GLRX3
GO:0032273	positive regulation of protein polymerization	19/1382	116/17913	0.00137652	0.0114683	19	MAP1B/CTTN/CDC42EP5/NCKAP1/PFN2/LMOD1/SCIN/KIRREL1/ABI2/HSPA1B/MYO1C/WASL/GSN/ARL2/HSPA1A/SNX9/HSP90AA1/RPS3/AKAP9
GO:0014066	regulation of phosphatidylinositol 3-kinase signaling	19/1382	117/17913	0.00152717	0.012389	19	DCN/SERPINE2/FGFR1/PDGFRB/PDGFRA/NTRK2/AGT/TWIST1/ANGPT1/UNC5B/PTPN13/SOX9/PDGFA/EGFR/PTK2/KLF4/IGF1/MYDGF/NOP53
GO:0045727	positive regulation of translation	19/1382	117/17913	0.00152717	0.012389	19	RBMS3/LARP6/SOX4/VIM/THBS1/SAMD4A/YBX3/RPL5/NPM1/RPS27L/CIRBP/RPS4X/EEF2/EIF5A/EIF6/RPL26/C1QBP/PPP1R15A/EIF3D
GO:0034101	erythrocyte homeostasis	19/1382	120/17913	0.00206558	0.0157888	19	EPAS1/AXL/RBFOX2/MAFB/HSPA1B/THRA/PRDX1/NFE2L1/TMEM14C/SMAD5/ZFP36L1/HSPA1A/PRMT1/RPS19/VEGFA/INHBA/KLF2/ZFP36/RPS17
GO:0043500	muscle adaptation	19/1382	121/17913	0.0022773	0.0170552	19	IGFBP5/LMNA/ERRFI1/AGT/HEY2/PDE5A/PTK2/IL6ST/LMCD1/KLF4/GSN/CAMK2D/ROCK2/TNFRSF1A/IGF1/MEF2C/MEF2A/ATP2A2/GLRX3
GO:0042552	myelination	19/1382	122/17913	0.00250696	0.0183547	19	CLU/ID4/PTN/NTRK2/TMEM98/LGI4/WASF3/ANK2/JAM3/PARD3/GPC1/CD9/S100B/NDRG1/SOD1/ILK/MTMR2/CTNNB1/HEXB
GO:0007272	ensheathment of neurons	19/1382	126/17913	0.00362904	0.0247442	19	CLU/ID4/PTN/NTRK2/TMEM98/LGI4/WASF3/ANK2/JAM3/PARD3/GPC1/CD9/S100B/NDRG1/SOD1/ILK/MTMR2/CTNNB1/HEXB
GO:0008366	axon ensheathment	19/1382	126/17913	0.00362904	0.0247442	19	CLU/ID4/PTN/NTRK2/TMEM98/LGI4/WASF3/ANK2/JAM3/PARD3/GPC1/CD9/S100B/NDRG1/SOD1/ILK/MTMR2/CTNNB1/HEXB
GO:0045598	regulation of fat cell differentiation	19/1382	131/17913	0.00558868	0.0343543	19	ADIRF/FRZB/RARRES2/WIF1/ID4/HES1/LPL/ENPP1/SFRP1/TGFB1I1/WWTR1/MEDAG/SNAI2/CCDC3/RUNX1T1/JAG1/SAV1/ZFP36L1/ZFP36
GO:0035304	regulation of protein dephosphorylation	19/1382	137/17913	0.00900463	0.0494943	19	PDGFRB/PTN/DLC1/RCAN2/IGFBP3/ITGA1/PPP1R14A/BOD1/ROCK2/YWHAE/HSP90AB1/LGALS3/CAMTA1/RCAN1/CALM2/PPP1R14B/PPP1R15A/HSP90B1/SET
GO:0035264	multicellular organism growth	19/1382	149/17913	0.0207611	0.0922219	19	SELENOM/CDKN1C/TNS2/WWTR1/CSF1/GHR/COMP/CLIC4/APP/ARID5B/SOD1/ZFP36L1/PPIB/IGF1/ADARB1/GNAS/ERCC1/TMED2/KLF2
GO:0008361	regulation of cell size	19/1382	154/17913	0.0282141	0.115553	19	FN1/APOE/CXCL12/LRP1/MAP1B/CTTN/NRP1/KCNMA1/EFNA5/TNFRSF12A/BMPR2/HSP90AB1/SPP1/ILK/AKT3/RYK/RDX/DPYSL2/VEGFA
GO:0048469	cell maturation	19/1382	167/17913	0.0568004	0.185561	19	FGFR1/EPAS1/CDKN1C/HES1/GJA1/PTH1R/FAM20C/AXL/LGI4/GLDN/NTN4/RUNX2/ANG/APP/CDKN1A/CTNNB1/MTCH1/VEGFA/KLF2
GO:0008217	regulation of blood pressure	19/1382	169/17913	0.0625406	0.195686	19	COL1A2/ACTA2/TPM1/EMP2/GAS6/NR2F2/GJA1/AGT/ENPEP/EDNRA/NAV2/PCSK5/SOD1/BMPR2/GUCY1A1/ADH5/ATP5PF/CES1/ATP1A1
GO:0001959	regulation of cytokine-mediated signaling pathway	19/1382	170/17913	0.0655557	0.203289	19	GAS6/CAV1/AXL/SLIT2/SLIT3/CSF1/ANGPT1/LIFR/CCDC3/IL1R1/SOCS3/HSPA1B/HSP90AB1/TNFRSF1A/GSTP1/HSPA1A/SPPL2A/SPHK1/RACK1
GO:0043433	negative regulation of DNA-binding transcription factor activity	19/1382	171/17913	0.0686688	0.210941	19	SFRP4/ID3/CYP1B1/NUPR1/ID1/GAS6/MDFI/TWIST1/PTGIS/TCF7L2/KLF4/PKD1/PRDX2/DAP/SMAD7/SRI/PHB2/FLNA/BHLHE40
GO:1903317	regulation of protein maturation	19/1382	175/17913	0.0821187	0.238544	19	CLU/CFH/SERPINE2/SERPING1/C1R/C1S/A2M/TMEM98/MMP14/GAS1/CD81/SOX4/THBS1/GSN/CD59/TMEM59/PHB/C1QBP/ENO1
GO:0006575	cellular modified amino acid metabolic process	19/1382	179/17913	0.0971972	0.265548	19	PLA2G2A/GGT5/PLOD2/CKB/DIO2/GSTM3/ALDH7A1/PCYOX1/PRDX4/NFE2L1/CRTAP/SOD1/CPQ/GPX4/GSTP1/PARK7/PDZD11/GLO1/P4HB
GO:0043409	negative regulation of MAPK cascade	19/1382	179/17913	0.0971972	0.265548	19	APOE/FBLN1/TIMP3/CAV1/EMILIN1/ERRFI1/RGS3/SFRP1/NDRG2/CAMK2N1/SPRED1/KLF4/ATF3/DUSP14/SPRY1/MYC/GSTP1/PHB/DNAJA1
GO:0043901	negative regulation of multi-organism process	19/1382	182/17913	0.10959	0.288622	19	IFITM3/TIMP1/HTRA1/ANXA2/PRDX4/ITGAV/GSN/JUN/IGF1/PRDX2/CALR/BANF1/TRIM8/IFI16/SQSTM1/IFITM1/MPHOSPH8/C1QBP/ZFP36
GO:1903708	positive regulation of hemopoiesis	19/1382	182/17913	0.10959	0.288622	19	FOXC1/GAS6/MDK/AXL/MMP14/CSF1/KITLG/SCIN/JAG1/HSPA1B/JUN/ZFP36L1/BAD/HSPA1A/PRMT1/GNAS/KLF10/INHBA/FOS
GO:0019722	calcium-mediated signaling	19/1382	188/17913	0.137162	0.340121	19	VCAM1/PLN/RCAN2/PTGFR/EGFR/ANK2/LMCD1/FHL2/CAMK2D/IGF1/CAMTA1/FIS1/RCAN1/SPHK1/NUDT4/SRI/CALM2/GSTO1/HINT1
GO:0006694	steroid biosynthetic process	19/1382	190/17913	0.147168	0.356967	19	APOE/IGFBP7/BMP5/DKK3/SNAI2/EGR1/PBX1/CYB5R3/SNAI1/SOD1/AKR1C3/CES1/INSIG2/ACAA2/RAN/MBTPS1/ATP1A1/CNBP/FDPS
GO:0032886	regulation of microtubule-based process	19/1382	199/17913	0.19699	0.425676	19	MAP1B/EPHA3/EFNA5/DIXDC1/CAMSAP2/PHLDB1/FEZ1/HSPA1B/PKD1/PHLDB2/ROCK2/ARL2/NPM1/HSPA1A/CHMP5/CTNNB1/FKBP4/RPS3/AKAP9
GO:0050670	regulation of lymphocyte proliferation	19/1382	199/17913	0.19699	0.425676	19	VCAM1/HES1/PDE5A/CD276/GPNMB/TWSG1/SDC4/CD81/IL6ST/PAWR/IGF1/CDKN1A/LGALS3/MIF/MEF2C/CTNNB1/IGFBP2/RPS3/AHR
GO:0007623	circadian rhythm	19/1382	201/17913	0.209065	0.43725	19	PTGDS/CAVIN3/NTRK2/ZFHX3/NGFR/MAPK10/EGFR/KLF9/CST3/EGR1/MAGED1/JUN/ROCK2/HEBP1/KLF10/IMPDH2/HNRNPR/BHLHE40/AHR
GO:2001020	regulation of response to DNA damage stimulus	19/1382	201/17913	0.209065	0.43725	19	CLU/CXCL12/ACKR3/TWIST1/SNAI2/EGFR/PLA2R1/SPRED1/SNAI1/MYC/MGMT/PTTG1IP/MAGEF1/HIC1/MIF/RPL26/ERCC1/RPS3/FUS
GO:0032388	positive regulation of intracellular transport	19/1382	203/17913	0.221477	0.453982	19	GAS6/EHD2/FEZ1/DAB2/ANXA2/CD81/TCF7L2/BAG3/STXBP1/MYO1C/LEPROT/YWHAE/RDX/PDCD5/MTMR2/FIS1/RAN/FLNA/TOMM7
GO:0015850	organic hydroxy compound transport	19/1382	228/17913	0.397555	0.644461	19	CLU/APOE/CXCL12/SELENOM/LRP1/CAV1/C1QTNF1/RBP4/AGT/AKR1C1/LIMA1/SNCG/ANXA2/PLTP/GPM6B/SPP1/PARK7/CES1/SLC5A3
GO:0050714	positive regulation of protein secretion	19/1382	256/17913	0.604485	0.814331	19	LRP1/MDK/GJA1/LPL/RBP4/TWIST1/EGFR/AKAP12/CADM1/SOX4/TCF7L2/ANG/MYH10/PHPT1/BAD/IGF1/MIF/SRI/PPIA
GO:0016236	macroautophagy	19/1382	272/17913	0.707945	0.863109	19	DCN/NUPR1/SYNPO2/FEZ1/BAG3/RETREG1/BNIP3/DYNLL1/RRAGA/MVB12A/SCOC/VDAC1/RHEB/OPTN/SQSTM1/TOMM20/RNF5/ATG101/TOMM7
GO:0002793	positive regulation of peptide secretion	19/1382	275/17913	0.725442	0.868437	19	LRP1/MDK/GJA1/LPL/RBP4/TWIST1/EGFR/AKAP12/CADM1/SOX4/TCF7L2/ANG/MYH10/PHPT1/BAD/IGF1/MIF/SRI/PPIA
GO:0002449	lymphocyte mediated immunity	19/1382	293/17913	0.816358	0.918134	19	CLU/SERPING1/C1R/C1S/EMP2/IL1R1/JAG1/CADM1/CD81/PRDX1/NECTIN2/KDELR1/TUBB/SMAD7/HSPD1/ERCC1/C1QBP/RFTN1/TUBB4B
GO:0032835	glomerulus development	18/1382	61/17913	4.48319e-07	1.51909e-05	18	ACTA2/FOXC1/PDGFRB/PDGFRA/HES1/NOTCH3/SULF1/FOXC2/LAMB2/WWTR1/ANGPT1/ENPEP/JAG1/NID1/EGR1/PDGFD/MEF2C/ANGPT2
GO:0022617	extracellular matrix disassembly	18/1382	78/17913	2.05996e-05	0.000370367	18	TIMP1/HTRA1/LRP1/MMP2/DDR2/CTSK/A2M/ADAMTS4/CTSL/MMP14/PDPN/LAMC1/ADAMTS5/FAP/CST3/TIMP2/FSCN1/CAPN2
GO:0072028	nephron morphogenesis	18/1382	79/17913	2.47772e-05	0.000424959	18	PDGFRB/HES1/PGF/AGT/IRX3/SOX9/FOXD1/NPNT/SIX1/PBX1/LZTS2/AHI1/PKD1/MAGED1/ILK/MYC/CTNNB1/VEGFA
GO:0033238	regulation of cellular amine metabolic process	18/1382	80/17913	2.9693e-05	0.000490417	18	PSMB5/COMT/PARK7/PNKD/PSMC3/PSMB6/PSMB1/PSMD8/PSMD2/PSMA3/PSMC5/PSMD3/PSMB7/PSMC1/PSMA2/PSMA1/PSMC4/PSME2
GO:0060218	hematopoietic stem cell differentiation	18/1382	83/17913	5.00461e-05	0.00076578	18	FOXC1/SFRP1/YAP1/PSMB5/PSMC3/PSMB6/PSMB1/PSMD8/PSMD2/PSMA3/PSMC5/PSMD3/PSMB7/PSMC1/PSMA2/PSMA1/PSMC4/PSME2
GO:0090100	positive regulation of transmembrane receptor protein serine/threonine kinase signaling pathway	18/1382	84/17913	5.9163e-05	0.00087906	18	CDKN1C/HES1/SULF1/BMP5/TGFB1I1/NEO1/FOXD1/NPNT/TWSG1/RBPMS/DAB2/THBS1/ENG/BMPR2/HSP90AB1/ILK/ITGA8/INHBA
GO:0010972	negative regulation of G2/M transition of mitotic cell cycle	18/1382	85/17913	6.97186e-05	0.00100552	18	FHL1/PSMB5/PSMC3/PSMB6/PSMB1/SKP1/PSMD8/NOP53/PSMD2/PSMA3/PSMC5/PSMD3/PSMB7/PSMC1/PSMA2/PSMA1/PSMC4/PSME2
GO:0010927	cellular component assembly involved in morphogenesis	18/1382	91/17913	0.00017543	0.00224502	18	TPM1/PDGFRB/PDGFRA/ANK2/GPC1/CD9/PHLDB1/ITGB1/MYH11/MYH10/PHLDB2/NECTIN2/ILK/CFL2/MTMR2/MEF2C/MEF2A/ACTG1
GO:0008630	intrinsic apoptotic signaling pathway in response to DNA damage	18/1382	92/17913	0.000202624	0.00251897	18	CLU/CXCL12/NUPR1/ACKR3/SNAI2/PHLDA3/SNAI1/TNFRSF1A/BAD/CRIP1/CDKN1A/HIC1/MIF/RPS27L/IFI16/RPL26/RPS3/DDIT4
GO:0032092	positive regulation of protein binding	18/1382	93/17913	0.000233428	0.0027717	18	APOE/LRP1/CAV1/NRP1/BAMBI/ANXA2/TCF7L2/APP/PKD1/CTHRC1/HSP90AB1/PPP2CB/LGALS3/PARK7/MEF2C/PLXND1/RAN/RPL11
GO:0060191	regulation of lipase activity	18/1382	94/17913	0.000268237	0.00312493	18	ANGPTL4/LRP1/FGFR1/PDGFRB/PDGFRA/RHOC/LPL/NTRK2/AGT/EDNRA/FGFR3/EGFR/PLA2R1/ANG/PCSK5/ARL1/ABL2/ARF4
GO:0008585	female gonad development	18/1382	95/17913	0.000307479	0.00349419	18	FOXC1/NUPR1/PDGFRA/ADAMTS1/SFRP1/MMP14/SLIT2/SLIT3/KITLG/ANG/ARID5B/SOD1/CTNNA1/PHB/UBB/VEGFA/INHBA/HSPA5
GO:0033273	response to vitamin	18/1382	95/17913	0.000307479	0.00349419	18	COL1A1/SPARC/TNC/BGLAP/MAP1B/GAS6/PTN/CCND1/SFRP1/SNAI2/EGFR/KANK2/ALPL/GSN/SPP1/MGMT/GSTP1/EEF2
GO:1902750	negative regulation of cell cycle G2/M phase transition	18/1382	97/17913	0.000401141	0.00428681	18	FHL1/PSMB5/PSMC3/PSMB6/PSMB1/SKP1/PSMD8/NOP53/PSMD2/PSMA3/PSMC5/PSMD3/PSMB7/PSMC1/PSMA2/PSMA1/PSMC4/PSME2
GO:0046545	development of primary female sexual characteristics	18/1382	100/17913	0.000587624	0.00574899	18	FOXC1/NUPR1/PDGFRA/ADAMTS1/SFRP1/MMP14/SLIT2/SLIT3/KITLG/ANG/ARID5B/SOD1/CTNNA1/PHB/UBB/VEGFA/INHBA/HSPA5
GO:0048524	positive regulation of viral process	18/1382	103/17913	0.000844344	0.00773384	18	APOE/LGALS1/CAV2/JUN/HACD3/NUCKS1/PPIB/ADARB1/POLR2F/POLR2H/POLR2E/MDFIC/POLR2I/PPIA/HSPA8/P4HB/POLR2L/POLR2K
GO:0006939	smooth muscle contraction	18/1382	105/17913	0.00106433	0.00934506	18	ACTA2/CAV1/SULF1/AGT/CTTN/SSTR2/EDNRA/KCNMA1/PRKG1/NPNT/SMTN/MYLK/COMP/MYH11/SOD1/ROCK2/GUCY1A1/SPHK1
GO:0055076	transition metal ion homeostasis	18/1382	105/17913	0.00106433	0.00934506	18	MT2A/EPAS1/CP/TF/CYBRD1/SLC39A14/SCARA5/BDH2/STEAP1/NEO1/APP/SOD1/MYC/NDFIP1/SKP1/STEAP4/SRI/NEDD8
GO:0006721	terpenoid metabolic process	18/1382	106/17913	0.00119151	0.0103456	18	APOE/LRP1/CYP1B1/RARRES2/LPL/SDC2/RBP4/HSPG2/AKR1C1/ALDH1A3/RBP1/EGFR/GPC1/SDC4/DHRS3/AKR1C3/ADH5/FDPS
GO:1990748	cellular detoxification	18/1382	107/17913	0.00133137	0.0112381	18	APOE/CYGB/GPX3/GPX8/GSTM3/PRDX4/SELENOW/MGST3/SOD1/ESD/GPX4/GSTP1/PARK7/PRDX2/PRDX6/PRDX3/GSTO1/AKR1A1
GO:0003300	cardiac muscle hypertrophy	18/1382	108/17913	0.00148491	0.01215	18	LMNA/ERRFI1/SORBS2/AGT/HEY2/PDE5A/PTK2/IL6ST/LMCD1/PDLIM5/CAMK2D/ROCK2/TNFRSF1A/IGF1/MEF2C/MEF2A/ATP2A2/GLRX3
GO:0006805	xenobiotic metabolic process	18/1382	110/17913	0.00183727	0.014416	18	CYP1B1/EPHX1/FMO2/CDO1/FMO3/GSTM3/AKR1C1/GHR/AOC3/CYB5R3/MGST3/HSP90AB1/PHGDH/GSTP1/CES1/PTGES3/GSTO1/AHR
GO:0030968	endoplasmic reticulum unfolded protein response	18/1382	112/17913	0.00225755	0.016953	18	LMNA/CCND1/KDELR3/CCL2/ATF3/ACADVL/MYDGF/YIF1A/SHC1/CALR/SEC31A/PDIA6/RACK1/MBTPS1/STUB1/HSPA5/PPP1R15A/HSP90B1
GO:0098754	detoxification	18/1382	113/17913	0.0024962	0.0183	18	APOE/CYGB/GPX3/GPX8/GSTM3/PRDX4/SELENOW/MGST3/SOD1/ESD/GPX4/GSTP1/PARK7/PRDX2/PRDX6/PRDX3/GSTO1/AKR1A1
GO:0042471	ear morphogenesis	18/1382	115/17913	0.00303707	0.0213904	18	FRZB/FGFR1/COL11A1/PRRX1/DLX5/TWIST1/SOX9/ALDH1A3/DLX6/SIX1/MAFB/SOD1/CTHRC1/ITGA8/COL2A1/ZEB1/INSIG2/PRKRA
GO:0007569	cell aging	18/1382	116/17913	0.00334207	0.0233022	18	PRELP/LMNA/BGLAP/TWIST1/TBX2/PLA2R1/PAWR/ENG/SOD1/ILK/AKT3/CDKN1A/MIF/NPM1/CALR/RWDD1/ERCC1/RSL1D1
GO:0034605	cellular response to heat	18/1382	117/17913	0.00367205	0.0249152	18	CRYAB/SCARA5/HSPA1B/BAG3/THBS1/MYOF/CAMK2D/YWHAE/HSP90AB1/CDKN1A/HSPA1A/PTGES3/FKBP4/HSBP1/ATP2A2/HSP90AA1/STUB1/HSPA8
GO:0008637	apoptotic mitochondrial changes	18/1382	119/17913	0.0044131	0.0286156	18	CLU/LMNA/BNIP3/JUN/YWHAE/PPP2CB/BAD/IGF1/YWHAQ/PDCD5/HSPA1A/FAM162A/FIS1/CHCHD10/ACAA2/IFI6/PRELID1/SLC25A5
GO:0019079	viral genome replication	18/1382	120/17913	0.00482737	0.0309052	18	IFITM3/GAS6/NFIA/EEA1/CCL2/ROCK2/HACD3/NUCKS1/PPIB/ADARB1/IFI27/BANF1/IFI16/IFITM1/MPHOSPH8/PPIA/HSPA8/HTATSF1
GO:0006720	isoprenoid metabolic process	18/1382	121/17913	0.00527301	0.0329333	18	APOE/LRP1/CYP1B1/RARRES2/LPL/SDC2/RBP4/HSPG2/AKR1C1/ALDH1A3/RBP1/EGFR/GPC1/SDC4/DHRS3/AKR1C3/ADH5/FDPS
GO:1902904	negative regulation of supramolecular fiber organization	18/1382	122/17913	0.00575175	0.0349772	18	CLU/APOE/CRYAB/MAP1B/EMILIN1/EPS8/PLEKHH2/SLIT2/DLC1/PFN2/LMOD1/SCIN/LIMA1/GSN/PHLDB2/RDX/FKBP4/HSPA8
GO:0045995	regulation of embryonic development	18/1382	128/17913	0.00942119	0.0514632	18	COL5A2/FGFR1/HES1/COL5A1/LAMA4/SFRP1/SULF1/TBX2/SIX1/PHLDB1/TULP3/PHLDA2/KLF4/SNAI1/PHLDB2/IGF1/CTNNB1/RACK1
GO:0030518	intracellular steroid hormone receptor signaling pathway	18/1382	129/17913	0.0101834	0.0546176	18	PMEPA1/SFRP1/TGFB1I1/RBFOX2/YAP1/KANK2/DAB2/PLPP1/FHL2/PARK7/CALR/CTNNB1/RWDD1/PHB/RAN/FKBP4/PHB2/LBH
GO:0050921	positive regulation of chemotaxis	18/1382	130/17913	0.0109941	0.0575273	18	CXCL12/RARRES2/FGFR1/PDGFRB/GAS6/PTN/MDK/SMOC2/SLIT2/CSF1/NRP1/HSPB1/THBS1/PDGFD/BMPR2/CALR/C1QBP/VEGFA
GO:2000058	regulation of ubiquitin-dependent protein catabolic process	18/1382	137/17913	0.018198	0.0833687	18	CLU/CAV1/MAP1A/DAB2/PTK2/HSP90AB1/MAGEF1/RPL5/PARK7/HSPA1A/RACK1/CAMLG/SMAD7/RPL11/NOP53/STUB1/UBXN1/SUMO2
GO:0010675	regulation of cellular carbohydrate metabolic process	18/1382	138/17913	0.0194712	0.0876217	18	IGFBP5/IGFBP4/LEPR/NUPR1/PTH1R/ENPP1/C1QTNF1/PDK4/IGFBP3/PHLDA2/NFE2L1/SCARB2/BAD/IGF1/FAM3C/COX11/PGAM1/DDIT4
GO:0071322	cellular response to carbohydrate stimulus	18/1382	139/17913	0.0208118	0.0923733	18	LGALS1/SERPINF1/LRP1/GAS6/COLEC12/EFNA5/SOX4/ZBTB20/ZFP36L1/PHPT1/BAD/HMGN3/FIS1/NDUFAF2/RACK1/SRI/NME1/JAGN1
GO:0001678	cellular glucose homeostasis	18/1382	142/17913	0.0252598	0.105382	18	LGALS1/SERPINF1/LRP1/GAS6/NGFR/EFNA5/SOX4/ZBTB20/NUCKS1/PHPT1/BAD/HMGN3/FIS1/NDUFAF2/RACK1/SRI/NME1/JAGN1
GO:0061337	cardiac conduction	18/1382	144/17913	0.0286013	0.116523	18	CAV1/FXYD1/GJA1/AGT/PLN/ANK2/ASPH/FXYD6/CAMK2D/YWHAE/AHCYL1/MEF2A/SRI/CALM2/ATP2A2/ATP1A1/FLNA/AKAP9
GO:0042133	neurotransmitter metabolic process	18/1382	145/17913	0.030391	0.12115	18	CLU/CYP1B1/CAV1/HNMT/AGT/SLC7A2/ALDH7A1/PTGIS/GCSH/DDAH2/KLF4/COMT/SLC1A3/ROCK2/HSP90AB1/PHGDH/HSP90AA1/KLF2
GO:1903900	regulation of viral life cycle	18/1382	147/17913	0.0342188	0.132143	18	IFITM3/LGALS1/CAV2/GSN/NECTIN2/HACD3/NUCKS1/PPIB/ADARB1/IFI27/BANF1/TRIM8/IFI16/IFITM1/MPHOSPH8/PPIA/HSPA8/P4HB
GO:1901861	regulation of muscle tissue development	18/1382	152/17913	0.0453246	0.160528	18	IGFBP5/FGFR1/GJA1/RBP4/LOX/TWIST1/YAP1/TBX2/HEY2/SIX1/SHOX2/GPC1/S100B/SAV1/YBX3/IGF1/MEF2C/CTNNB1
GO:0009132	nucleoside diphosphate metabolic process	18/1382	153/17913	0.0478236	0.164453	18	NUPR1/AK1/NME3/ZBTB20/NME4/BAD/IGF1/LDHA/TPI1/NME1/EIF6/PKM/CMPK1/PFKP/PGAM1/NUDT5/DDIT4/ENO1
GO:0006364	rRNA processing	18/1382	154/17913	0.0504189	0.171049	18	RPL5/SBDS/GTF2H5/RPS2/RPL11/RPL14/RPS9/TRMT112/FAM207A/PA2G4/NHP2/RPS19/RPL26/RPS16/RPL35A/NSA2/SNU13/RPS17
GO:0016125	sterol metabolic process	18/1382	155/17913	0.0531123	0.177438	18	APOE/LEPR/CYP1B1/LIMA1/APP/CYB5R3/NFE2L1/SOD1/ACADVL/HDLBP/CES1/INSIG2/ACAA2/RAN/EBPL/MBTPS1/CNBP/FDPS
GO:0021915	neural tube development	18/1382	155/17913	0.0531123	0.177438	18	HES1/SFRP1/BMP5/TWIST1/DLC1/INTU/SDC4/SOX4/TULP3/PKD1/PLXNB2/CTHRC1/ZFP36L1/LMO4/PHGDH/IFT57/RALA/TMED2
GO:0099173	postsynapse organization	18/1382	158/17913	0.0617943	0.193864	18	APOE/PTN/NRP2/CTTN/NRP1/TMEM108/PTPRD/NRXN2/ABI2/PDLIM5/NDRG1/WASL/MYH10/MTMR2/RER1/ARF4/HSPA8/ACTG1
GO:0050954	sensory perception of mechanical stimulus	18/1382	159/17913	0.0648933	0.201347	18	COL1A1/CXCL12/SERPINE2/FGFR1/COL11A1/MYO6/SNAI2/ALDH7A1/SIX1/BACE1/NAV2/SLC1A3/SOD1/COL2A1/SERPINB6/TIMM8B/HEXB/TIMM13
GO:0006941	striated muscle contraction	18/1382	170/17913	0.106051	0.282378	18	TPM1/CAV1/GJA1/PLN/PDE5A/ANK2/C12orf57/VEGFB/SMAD5/CAMK2D/EEF2/SMAD7/SRI/CALM2/ATP2A2/GSTO1/ATP1A1/FLNA
GO:0070507	regulation of microtubule cytoskeleton organization	18/1382	170/17913	0.106051	0.282378	18	MAP1B/EPHA3/EFNA5/DIXDC1/CAMSAP2/PHLDB1/HSPA1B/PKD1/PHLDB2/ROCK2/ARL2/NPM1/HSPA1A/CHMP5/CTNNB1/FKBP4/RPS3/AKAP9
GO:0034341	response to interferon-gamma	18/1382	173/17913	0.119574	0.30796	18	MT2A/IFITM3/VCAM1/NCAM1/CDC42EP4/SOCS3/VIM/STXBP1/MYO1C/CCL2/GSN/CAMK2D/HSP90AB1/FLNB/TRIM8/IFITM1/RPL13A/ACTG1
GO:0070613	regulation of protein processing	18/1382	173/17913	0.119574	0.30796	18	CLU/CFH/SERPINE2/SERPING1/C1R/C1S/A2M/TMEM98/MMP14/GAS1/CD81/THBS1/GSN/CD59/TMEM59/PHB/C1QBP/ENO1
GO:0042098	T cell proliferation	18/1382	177/17913	0.139135	0.341055	18	VCAM1/HES1/GJA1/CD151/PDE5A/CD276/GPNMB/TWSG1/SDC4/CD81/IL6ST/PAWR/IGF1/LGALS3/PRDX2/CTNNB1/IGFBP2/RPS3
GO:0019362	pyridine nucleotide metabolic process	18/1382	179/17913	0.149559	0.361349	18	NNMT/NUPR1/FMO2/NT5E/PTGIS/ZBTB20/IGF1/LDHA/TPI1/MDH1/MDH2/EIF6/PKM/MPC1/PFKP/PGAM1/DDIT4/ENO1
GO:0046496	nicotinamide nucleotide metabolic process	18/1382	179/17913	0.149559	0.361349	18	NNMT/NUPR1/FMO2/NT5E/PTGIS/ZBTB20/IGF1/LDHA/TPI1/MDH1/MDH2/EIF6/PKM/MPC1/PFKP/PGAM1/DDIT4/ENO1
GO:0072524	pyridine-containing compound metabolic process	18/1382	184/17913	0.177439	0.396472	18	NNMT/NUPR1/FMO2/NT5E/PTGIS/ZBTB20/IGF1/LDHA/TPI1/MDH1/MDH2/EIF6/PKM/MPC1/PFKP/PGAM1/DDIT4/ENO1
GO:0030595	leukocyte chemotaxis	18/1382	188/17913	0.20152	0.432206	18	CXCL12/RARRES2/GAS6/PTN/MDK/NBL1/SLIT2/CSF1/JAM3/ITGA1/THBS1/CCL2/LGALS3/MIF/SBDS/CALR/RPS19/C1QBP
GO:0044242	cellular lipid catabolic process	18/1382	189/17913	0.207773	0.435039	18	LRP1/CYP1B1/LPL/TWIST1/BDH2/ENPP2/MGLL/ACADVL/AKR1C3/ECH1/PRDX6/SPHK1/ETFB/HADHB/ACAA2/ECHS1/HEXB/HADHA
GO:0006733	oxidoreduction coenzyme metabolic process	18/1382	192/17913	0.227059	0.462865	18	NNMT/NUPR1/FMO2/NT5E/PTGIS/ZBTB20/IGF1/LDHA/TPI1/MDH1/MDH2/EIF6/PKM/MPC1/PFKP/PGAM1/DDIT4/ENO1
GO:0097164	ammonium ion metabolic process	18/1382	193/17913	0.233657	0.466799	18	PLA2G2A/HNMT/AKR1C1/ENPP2/AKR1C2/ALDH7A1/COMT/KDSR/AKR1C3/DBI/SAT2/PARK7/PNKD/SPHK1/CAPN2/SRM/AKR1A1/DHPS
GO:0032869	cellular response to insulin stimulus	18/1382	197/17913	0.260825	0.498826	18	RARRES2/BGLAP/LPL/ERRFI1/ENPP1/FOXC2/CAV2/AGT/PDK4/MYO1C/ZFP36L1/RAB13/NUCKS1/GSTP1/SHC1/USO1/EIF4EBP1/APRT
GO:0007254	JNK cascade	18/1382	200/17913	0.281947	0.522434	18	SFRP1/FZD8/CDC42EP5/SASH1/MAPK10/EGFR/LTBR/APP/GADD45B/HACD3/MAP3K20/GSTP1/MDFIC/RPS27A/UBB/RPS3/DNAJA1/GADD45A
GO:1901605	alpha-amino acid metabolic process	18/1382	200/17913	0.281947	0.522434	18	PLOD2/CDO1/HNMT/CKB/ALDH7A1/GFPT2/PRDX4/GCSH/DDAH2/COMT/SLC1A3/CRTAP/PHGDH/PARK7/ADI1/SARS/OAT/P4HB
GO:0006486	protein glycosylation	18/1382	228/17913	0.495209	0.743148	18	RAMP1/A4GALT/TUSC3/TMTC1/VEGFB/EXT2/OSTC/DAD1/MCFD2/TRIP11/TMEM59/LMAN1/DPM3/KRTCAP2/PGM3/TMEM165/TMEM258/OST4
GO:0043413	macromolecule glycosylation	18/1382	228/17913	0.495209	0.743148	18	RAMP1/A4GALT/TUSC3/TMTC1/VEGFB/EXT2/OSTC/DAD1/MCFD2/TRIP11/TMEM59/LMAN1/DPM3/KRTCAP2/PGM3/TMEM165/TMEM258/OST4
GO:0030217	T cell differentiation	18/1382	234/17913	0.540926	0.780615	18	LEPR/MDK/TMEM98/FZD8/MAFB/RUNX2/EGR1/SOX4/SOD1/ZFP36L1/BAD/KDELR1/PRDX2/CTNNB1/ZEB1/SMAD7/PRELID1/RPL22
GO:0031503	protein-containing complex localization	18/1382	238/17913	0.570705	0.798843	18	MAPK10/DYNC2H1/ARL3/DYNLL1/WASL/IFT43/PURA/IFT57/KIFAP3/TRIP11/CLSTN1/SMAD7/RAN/SSB/FKBP4/EIF5A/DYNLRB1/SRSF7
GO:0070085	glycosylation	18/1382	241/17913	0.592568	0.806886	18	RAMP1/A4GALT/TUSC3/TMTC1/VEGFB/EXT2/OSTC/DAD1/MCFD2/TRIP11/TMEM59/LMAN1/DPM3/KRTCAP2/PGM3/TMEM165/TMEM258/OST4
GO:0016054	organic acid catabolic process	18/1382	250/17913	0.655173	0.833325	18	CDO1/HNMT/TWIST1/BDH2/ALDH7A1/GCSH/DDAH2/ACADVL/BCAT1/ECH1/ETFB/HADHB/ACAA2/ECHS1/HEXB/AKR1A1/TXN2/HADHA
GO:0046395	carboxylic acid catabolic process	18/1382	250/17913	0.655173	0.833325	18	CDO1/HNMT/TWIST1/BDH2/ALDH7A1/GCSH/DDAH2/ACADVL/BCAT1/ECH1/ETFB/HADHB/ACAA2/ECHS1/HEXB/AKR1A1/TXN2/HADHA
GO:0006260	DNA replication	18/1382	260/17913	0.718433	0.86618	18	ID3/PTMS/FGFR1/NFIC/NFIB/EGFR/NFIA/CST3/NFIX/JUN/NUCKS1/PURA/CDK2AP1/ZBTB38/POLD2/STOML2/CENPX/SET
GO:0030216	keratinocyte differentiation	18/1382	298/17913	0.888509	0.955018	18	FOXC1/ERRFI1/PALLD/CTSK/CTSL/YAP1/INTU/JAG1/CLIC4/SAV1/CD109/ZFP36L1/ROCK2/AKR1C3/FLNB/KRT10/TXNIP/ZFP36
GO:0032259	methylation	18/1382	336/17913	0.964629	0.98987	18	NNMT/LMNA/HNMT/COPRS/GCSH/COMT/MYC/MGMT/SETD7/CTNNB1/PRMT1/METTL7A/GNAS/TRMT112/GSTO1/MPHOSPH8/FOS/NTMT1
GO:0018205	peptidyl-lysine modification	18/1382	376/17913	0.991381	0.999851	18	LMNA/PLOD2/TWIST1/SNAI2/P3H4/EGR1/SOX4/GCSH/EID1/SETD7/PARK7/CTNNB1/NDUFAB1/TGM2/UBA2/DHPS/SUMO2/SET
GO:0035987	endodermal cell differentiation	17/1382	45/17913	1.51787e-08	8.03316e-07	17	FN1/COL6A1/COL5A2/COL11A1/MMP2/COL5A1/COL12A1/ITGB5/COL8A1/MMP14/COL4A2/LAMB1/ITGA7/ITGAV/CTNNB1/HSBP1/INHBA
GO:0001706	endoderm formation	17/1382	50/17913	9.34767e-08	3.7916e-06	17	FN1/COL6A1/COL5A2/COL11A1/MMP2/COL5A1/COL12A1/ITGB5/COL8A1/MMP14/COL4A2/LAMB1/ITGA7/ITGAV/CTNNB1/HSBP1/INHBA
GO:0048146	positive regulation of fibroblast proliferation	17/1382	51/17913	1.30188e-07	5.09474e-06	17	FN1/PDGFRB/GAS6/PDGFRA/DDR2/AGT/PDGFA/EGFR/PDGFC/PDGFD/JUN/NDUFS4/IGF1/MYC/CDKN1A/MIF/SPHK1
GO:0060688	regulation of morphogenesis of a branching structure	17/1382	57/17913	7.88908e-07	2.39561e-05	17	FGFR1/FGF7/MDK/PGF/SFRP1/SULF1/AGT/SNAI2/SOX9/PDGFA/NTN4/SIX1/SHOX2/MAGED1/CTNNB1/PHB2/VEGFA
GO:0006521	regulation of cellular amino acid metabolic process	17/1382	61/17913	2.2555e-06	5.91217e-05	17	PSMB5/COMT/PARK7/PSMC3/PSMB6/PSMB1/PSMD8/PSMD2/PSMA3/PSMC5/PSMD3/PSMB7/PSMC1/PSMA2/PSMA1/PSMC4/PSME2
GO:0071230	cellular response to amino acid stimulus	17/1382	64/17913	4.64241e-06	0.000109313	17	COL1A1/COL1A2/COL3A1/COL6A1/COL5A2/MMP2/PDGFRA/NTRK2/COL4A1/COL16A1/EGFR/SIX1/PDGFC/PDGFD/RRAGA/ZEB1/CAPN2
GO:2000573	positive regulation of DNA biosynthetic process	17/1382	66/17913	7.30439e-06	0.000155519	17	PDGFRB/SMOC2/KLF4/HSP90AB1/MYC/CTNNB1/CCT3/PTGES3/CCT7/HSP90AA1/CCT4/TCP1/CCT6A/HNRNPA1/CCT2/CCT8/CCT5
GO:0031146	SCF-dependent proteasomal ubiquitin-dependent protein catabolic process	17/1382	69/17913	1.38765e-05	0.000265902	17	WWTR1/PSMB5/PSMC3/PSMB6/PSMB1/SKP1/PSMD8/PSMD2/PSMA3/PSMC5/PSMD3/PSMB7/PSMC1/PSMA2/PSMA1/PSMC4/PSME2
GO:0071479	cellular response to ionizing radiation	17/1382	69/17913	1.38765e-05	0.000265902	17	CRYAB/SFRP1/SNAI2/YAP1/RHOB/EGR1/NET1/NUCKS1/MAP3K20/MGMT/CDKN1A/TMEM109/GTF2H5/IFI16/RPL26/HSPA5/GADD45A
GO:0030500	regulation of bone mineralization	17/1382	71/17913	2.07917e-05	0.000371509	17	MGP/BGLAP/PTN/GJA1/DDR2/ENPP1/OMD/FAM20C/TWIST1/TMEM119/SOX9/COMP/GPM6B/BMPR2/ANKH/MEF2C/ATRAID
GO:1902036	regulation of hematopoietic stem cell differentiation	17/1382	72/17913	2.52835e-05	0.000429664	17	FOXC1/YAP1/PSMB5/PSMC3/PSMB6/PSMB1/PSMD8/PSMD2/PSMA3/PSMC5/PSMD3/PSMB7/PSMC1/PSMA2/PSMA1/PSMC4/PSME2
GO:0048678	response to axon injury	17/1382	75/17913	4.43565e-05	0.000690446	17	LGALS1/TNC/APOD/LRP1/MAP1B/PTN/LAMB2/DPYSL3/JAM3/CST3/KLF4/SOD1/JUN/SPP1/CTNNA1/ARF4/TXN2
GO:0072078	nephron tubule morphogenesis	17/1382	75/17913	4.43565e-05	0.000690446	17	HES1/PGF/AGT/IRX3/SOX9/FOXD1/NPNT/SIX1/PBX1/LZTS2/AHI1/PKD1/MAGED1/ILK/MYC/CTNNB1/VEGFA
GO:0072088	nephron epithelium morphogenesis	17/1382	77/17913	6.32865e-05	0.000932846	17	HES1/PGF/AGT/IRX3/SOX9/FOXD1/NPNT/SIX1/PBX1/LZTS2/AHI1/PKD1/MAGED1/ILK/MYC/CTNNB1/VEGFA
GO:0014910	regulation of smooth muscle cell migration	17/1382	85/17913	0.000228866	0.00272908	17	IGFBP5/TPM1/LRP1/PDGFRB/MDK/ADAMTS1/SLIT2/AGT/NRP1/PDGFA/PRKG1/IGFBP3/PDGFD/ILK/IGF1/GSTP1/MEF2C
GO:0045185	maintenance of protein location	17/1382	85/17913	0.000228866	0.00272908	17	FBN1/CAV1/NBL1/LTBP1/MDFI/SCIN/PKD1/GSN/ARL2/SUN1/PARK7/FLNB/SKP1/OS9/SRI/FLNA/HSPA5
GO:1903035	negative regulation of response to wounding	17/1382	87/17913	0.000306152	0.0034934	17	APOE/SERPINE2/SERPING1/PDGFRA/TFPI/MDK/GJA1/C1QTNF1/PDGFA/PRKG1/FAP/CD9/THBS1/CD109/PHLDB2/SPP1/CDKN1A
GO:0030316	osteoclast differentiation	17/1382	94/17913	0.000780506	0.00736379	17	BGLAP/FBN1/FAM20C/SFRP1/CSF1/SH3PXD2A/MAFB/ANXA2/CD81/CD109/TOB2/CTNNB1/GNAS/GLO1/KLF10/JUNB/FOS
GO:1990823	response to leukemia inhibitory factor	17/1382	94/17913	0.000780506	0.00736379	17	PCOLCE/EPS8/NRP2/MRAS/GFPT2/PCOLCE2/SOCS3/KLF4/ARID5B/EIF4A2/SMAD7/SRM/MPC1/NCL/PFKP/SRSF7/SLC25A5
GO:1990830	cellular response to leukemia inhibitory factor	17/1382	94/17913	0.000780506	0.00736379	17	PCOLCE/EPS8/NRP2/MRAS/GFPT2/PCOLCE2/SOCS3/KLF4/ARID5B/EIF4A2/SMAD7/SRM/MPC1/NCL/PFKP/SRSF7/SLC25A5
GO:0016101	diterpenoid metabolic process	17/1382	97/17913	0.00112493	0.00984446	17	APOE/LRP1/CYP1B1/RARRES2/LPL/SDC2/RBP4/HSPG2/AKR1C1/ALDH1A3/RBP1/EGFR/GPC1/SDC4/DHRS3/AKR1C3/ADH5
GO:0007043	cell-cell junction assembly	17/1382	98/17913	0.0012652	0.0108213	17	CAV1/RHOC/GJA1/AGT/TJP1/SNAI2/ANK2/PARD3/CD9/MYO1C/SNAI1/AFDN/RAB13/ROCK2/CTNNA1/FSCN1/ARL2
GO:0043502	regulation of muscle adaptation	17/1382	106/17913	0.00301608	0.0212695	17	IGFBP5/LMNA/ERRFI1/AGT/PDE5A/PTK2/IL6ST/LMCD1/KLF4/FBXO32/CAMK2D/ROCK2/TNFRSF1A/IGF1/MEF2A/ATP2A2/GLRX3
GO:1904019	epithelial cell apoptotic process	17/1382	111/17913	0.0048974	0.0312456	17	SFRP4/ANGPTL4/NUPR1/GAS6/MDK/ANGPT1/NDNF/TCF7L2/COL18A1/THBS1/CCL2/GSN/ZFP36L1/BMPR2/BAD/AKR1C3/ZFP36
GO:0021987	cerebral cortex development	17/1382	112/17913	0.0053698	0.0332664	17	COL3A1/LRP1/MDK/NTRK2/NRP2/SLIT2/GNG12/NRP1/LAMB1/EGFR/DIXDC1/BNIP3/YWHAE/BAD/SUN1/CTNNB1/FLNA
GO:1903510	mucopolysaccharide metabolic process	17/1382	112/17913	0.0053698	0.0332664	17	DCN/LUM/BGN/PRELP/FMOD/ACAN/OGN/OMD/ANGPT1/ITIH5/NDNF/CSPG4/DSEL/CHST3/UGDH/VCAN/HEXB
GO:0070252	actin-mediated cell contraction	17/1382	115/17913	0.00701389	0.041201	17	TPM2/TPM1/EMP2/CAV1/GJA1/FRMD6/PDPN/PLN/PARVA/ANK2/VIM/CAMK2D/MYL6B/TPM4/SRI/ATP1A1/FLNA
GO:0001838	embryonic epithelial tube formation	17/1382	120/17913	0.0106364	0.0559191	17	SFRP1/BMP5/TWIST1/IRX3/DLC1/SOX9/SIX1/SDC4/SOX4/TULP3/PLXNB2/CTHRC1/LMO4/IFT57/CTNNB1/RALA/TMED2
GO:0002687	positive regulation of leukocyte migration	17/1382	121/17913	0.0115131	0.0596257	17	CXCL12/RARRES2/GAS6/PTN/THY1/MDK/MMP14/CSF1/KITLG/IL1R1/APP/THBS1/PDGFD/LGALS3/CALR/C1QBP/VEGFA
GO:0055007	cardiac muscle cell differentiation	17/1382	121/17913	0.0115131	0.0596257	17	LMNA/PDGFRB/PDGFRA/SGCB/SORBS2/AGT/HEY2/CBY1/ITGB1/PDLIM5/MYH11/MYH10/IGF1/MEF2C/CALR/MEF2A/VEGFA
GO:0072655	establishment of protein localization to mitochondrion	17/1382	121/17913	0.0115131	0.0596257	17	BAG3/LEPROT/YWHAE/BAD/YWHAQ/PDCD5/LMAN1/FIS1/DNAJC19/SLC25A6/NDUFA13/HSP90AA1/TIMM8B/TOMM20/DNAJA1/TIMM13/TOMM7
GO:0034763	negative regulation of transmembrane transport	17/1382	122/17913	0.0124459	0.0631039	17	CAV1/ENPP1/GEM/TWIST1/PLN/THBS1/RRAD/CAMK2D/YWHAE/SESTD1/YWHAQ/PEA15/SRI/ARL6IP5/CALM2/ISCU/GSTO1
GO:0030326	embryonic limb morphogenesis	17/1382	123/17913	0.0134371	0.066789	17	FGFR1/PRRX1/GJA1/DLX5/TWIST1/TBX2/HOXA10/INTU/DYNC2H1/DLX6/SHOX2/RUNX2/PBX1/TULP3/MAP3K20/CTNNB1/GNAS
GO:0035113	embryonic appendage morphogenesis	17/1382	123/17913	0.0134371	0.066789	17	FGFR1/PRRX1/GJA1/DLX5/TWIST1/TBX2/HOXA10/INTU/DYNC2H1/DLX6/SHOX2/RUNX2/PBX1/TULP3/MAP3K20/CTNNB1/GNAS
GO:0019218	regulation of steroid metabolic process	17/1382	124/17913	0.0144891	0.0702584	17	APOE/IGFBP7/BMP5/AGT/DKK3/SNAI2/EGR1/SNAI1/SOD1/ACADVL/AKR1C3/INSIG2/RAN/MBTPS1/STUB1/ATP1A1/FDPS
GO:0070585	protein localization to mitochondrion	17/1382	125/17913	0.0156043	0.0747528	17	BAG3/LEPROT/YWHAE/BAD/YWHAQ/PDCD5/LMAN1/FIS1/DNAJC19/SLC25A6/NDUFA13/HSP90AA1/TIMM8B/TOMM20/DNAJA1/TIMM13/TOMM7
GO:0045216	cell-cell junction organization	17/1382	128/17913	0.0193528	0.0876217	17	CAV1/RHOC/GJA1/AGT/TJP1/SNAI2/ANK2/PARD3/CD9/MYO1C/SNAI1/AFDN/RAB13/ROCK2/CTNNA1/FSCN1/ARL2
GO:0072175	epithelial tube formation	17/1382	128/17913	0.0193528	0.0876217	17	SFRP1/BMP5/TWIST1/IRX3/DLC1/SOX9/SIX1/SDC4/SOX4/TULP3/PLXNB2/CTHRC1/LMO4/IFT57/CTNNB1/RALA/TMED2
GO:0016999	antibiotic metabolic process	17/1382	130/17913	0.0222115	0.0966555	17	GPX3/AKR1C1/AKR1C2/EGFR/PRDX1/SOD1/ESD/AKR1C3/PARK7/PRDX2/ADH5/ALDH2/SDHD/PRDX3/MDH2/AKR1A1/IDH3G
GO:0010977	negative regulation of neuron projection development	17/1382	135/17913	0.0307546	0.122424	17	APOE/LGALS1/LRP1/ID1/THY1/PMP22/SLIT2/DPYSL3/NRP1/NGFR/PTPRG/PTK2/VIM/SPP1/RYK/FKBP4/ITM2C
GO:2000241	regulation of reproductive process	17/1382	135/17913	0.0307546	0.122424	17	TIMP1/SERPINF1/NUPR1/SFRP1/SULF1/SOX9/SYDE1/PDE5A/PRDX4/STXBP1/PHLDA2/SNAI1/IGF1/CALR/CTNNB1/C1QBP/INHBA
GO:0009267	cellular response to starvation	17/1382	136/17913	0.032721	0.128593	17	GAS6/SFRP1/PDK4/COMT/JUN/ATF3/BMPR2/AKR1C3/CDKN1A/RRAGA/DAP/DNAJC15/IFI16/KLF10/HSPA8/HNRNPA1/HSPA5
GO:0030879	mammary gland development	17/1382	138/17913	0.036929	0.137635	17	IGFBP5/CAV1/GJA1/CDO1/CCND1/CSF1/SOX9/TBX2/ZNF703/PAM/MGMT/ARHGAP5/PHB2/NME1/VEGFA/LBH/APRT
GO:0007338	single fertilization	17/1382	140/17913	0.0415179	0.150597	17	MFGE8/HOXA10/CD9/STXBP1/ADCY3/PARK7/CCT3/VDAC2/CCT7/SLIRP/CCT4/TCP1/HEXB/CCT2/CCT8/SNU13/CCT5
GO:0055123	digestive system development	17/1382	143/17913	0.0491494	0.167918	17	COL3A1/RARRES2/PDGFRA/CDKN1C/HES1/SFRP1/CLMP/TBX2/EGFR/SHOX2/PDGFC/SAV1/AHI1/PKD1/PCSK5/CDKN1A/CTNNB1
GO:0043467	regulation of generation of precursor metabolites and energy	17/1382	144/17913	0.0518999	0.175677	17	NUPR1/CAVIN3/ENPP1/PHLDA2/BNIP3/ZBTB20/IGF1/PARK7/DNAJC15/CHCHD10/PHB2/ISCU/EIF6/NOP53/PRELID1/PGAM1/DDIT4
GO:0030041	actin filament polymerization	17/1382	145/17913	0.0547565	0.180262	17	EPS8/SLIT2/CTTN/CDC42EP5/NCKAP1/PFN2/LMOD1/WASF3/SCIN/KIRREL1/ABI2/ANG/MYO1C/WASL/GSN/RDX/SNX9
GO:0046165	alcohol biosynthetic process	17/1382	145/17913	0.0547565	0.180262	17	APOE/PTH1R/BMP5/DKK3/ISYNA1/CYB5R3/SOD1/PARK7/SPHK1/CES1/PTS/INSIG2/ACAA2/RAN/MBTPS1/CNBP/FDPS
GO:1902652	secondary alcohol metabolic process	17/1382	147/17913	0.0607942	0.192187	17	APOE/LEPR/FGFR1/LIMA1/APP/CYB5R3/NFE2L1/SOD1/ACADVL/HDLBP/CES1/INSIG2/ACAA2/RAN/MBTPS1/CNBP/FDPS
GO:0016202	regulation of striated muscle tissue development	17/1382	149/17913	0.0672733	0.207342	17	FGFR1/GJA1/RBP4/LOX/TWIST1/YAP1/TBX2/HEY2/SIX1/SHOX2/GPC1/S100B/SAV1/YBX3/IGF1/MEF2C/CTNNB1
GO:0032680	regulation of tumor necrosis factor production	17/1382	151/17913	0.0742033	0.220389	17	CLU/GAS6/LPL/ERRFI1/AXL/TWIST1/ANGPT1/GPNMB/AKAP12/HSPB1/APP/THBS1/ZBTB20/IGF1/GSTP1/MIF/ZFP36
GO:1903707	negative regulation of hemopoiesis	17/1382	152/17913	0.0778399	0.227901	17	FBN1/MDK/HES1/SFRP1/MAFB/TMEM176B/TMEM176A/ZFP36L1/MYC/TOB2/PRDX2/CTNNB1/PRMT1/SMAD7/NME1/INHBA/ZFP36
GO:0048634	regulation of muscle organ development	17/1382	153/17913	0.0815919	0.237386	17	FGFR1/GJA1/RBP4/LOX/TWIST1/YAP1/TBX2/HEY2/SIX1/SHOX2/GPC1/S100B/SAV1/YBX3/IGF1/MEF2C/CTNNB1
GO:0000723	telomere maintenance	17/1382	154/17913	0.0854601	0.244669	17	HSP90AB1/MYC/CTNNB1/CCT3/PTGES3/POLD2/CCT7/NHP2/HSP90AA1/ERCC1/CCT4/TCP1/CCT6A/HNRNPA1/CCT2/CCT8/CCT5
GO:0032640	tumor necrosis factor production	17/1382	155/17913	0.089445	0.249897	17	CLU/GAS6/LPL/ERRFI1/AXL/TWIST1/ANGPT1/GPNMB/AKAP12/HSPB1/APP/THBS1/ZBTB20/IGF1/GSTP1/MIF/ZFP36
GO:1903555	regulation of tumor necrosis factor superfamily cytokine production	17/1382	155/17913	0.089445	0.249897	17	CLU/GAS6/LPL/ERRFI1/AXL/TWIST1/ANGPT1/GPNMB/AKAP12/HSPB1/APP/THBS1/ZBTB20/IGF1/GSTP1/MIF/ZFP36
GO:0071706	tumor necrosis factor superfamily cytokine production	17/1382	161/17913	0.11582	0.302308	17	CLU/GAS6/LPL/ERRFI1/AXL/TWIST1/ANGPT1/GPNMB/AKAP12/HSPB1/APP/THBS1/ZBTB20/IGF1/GSTP1/MIF/ZFP36
GO:0120032	regulation of plasma membrane bounded cell projection assembly	17/1382	166/17913	0.141015	0.343241	17	CAV1/SLIT2/CDC42EP5/DPYSL3/NRP1/CDC42EP4/NCKAP1/CDC42EP1/PFN2/MYO10/WASL/MAP4/FSCN1/RDX/ODF2L/RALA/VDAC3
GO:0032200	telomere organization	17/1382	167/17913	0.146398	0.355565	17	HSP90AB1/MYC/CTNNB1/CCT3/PTGES3/POLD2/CCT7/NHP2/HSP90AA1/ERCC1/CCT4/TCP1/CCT6A/HNRNPA1/CCT2/CCT8/CCT5
GO:0060491	regulation of cell projection assembly	17/1382	168/17913	0.151893	0.363666	17	CAV1/SLIT2/CDC42EP5/DPYSL3/NRP1/CDC42EP4/NCKAP1/CDC42EP1/PFN2/MYO10/WASL/MAP4/FSCN1/RDX/ODF2L/RALA/VDAC3
GO:0007416	synapse assembly	17/1382	172/17913	0.174973	0.396472	17	MAP1B/NTRK2/FARP1/FLRT2/PTPRD/TPBG/THBS2/EFNA5/SIX1/NRXN2/PTK2/APP/PDLIM5/PLXNB2/RYK/MEF2C/PLXND1
GO:1901292	nucleoside phosphate catabolic process	17/1382	175/17913	0.193393	0.423604	17	NUPR1/ENPP1/NT5E/PDE5A/ZBTB20/IGF1/LDHA/TPI1/EIF6/PKM/PFKP/PGAM1/NUDT5/DNPH1/DDIT4/HINT1/ENO1
GO:0051168	nuclear export	17/1382	176/17913	0.199734	0.428873	17	GAS6/PTPN14/TCF7L2/BAG3/LZTS2/PKD1/YWHAE/PARK7/IFI27/CALR/AHCYL1/RAN/SSB/PHAX/EIF5A/HNRNPA1/SRSF7
GO:0051147	regulation of muscle cell differentiation	17/1382	185/17913	0.260899	0.498826	17	MMP14/TMEM119/EHD2/BOC/HEY2/SHOX2/SMARCD3/ENG/CTNNA1/IGF1/MORF4L2/MEF2C/CTNNB1/ZEB1/CAPN2/MEF2A/YBX1
GO:1902115	regulation of organelle assembly	17/1382	185/17913	0.260899	0.498826	17	NUPR1/PTPRD/FEZ1/SDC4/HSPA1B/GSN/MAP4/FSCN1/RDX/NPM1/NBDY/HSPA1A/MEF2C/CHMP5/ODF2L/RNF5/VDAC3
GO:0030258	lipid modification	17/1382	192/17913	0.312707	0.556068	17	APOE/APOD/CYGB/AGT/TWIST1/PDK4/BDH2/PLPP1/ACADVL/MTMR2/ECH1/SPHK1/ETFB/HADHB/ACAA2/ECHS1/HADHA
GO:1904950	negative regulation of establishment of protein localization	17/1382	193/17913	0.320343	0.563562	17	FN1/APOE/APOD/GAS6/SFRP1/ANGPT1/BAG3/PKIG/PARK7/NDFIP1/LMAN1/ERLEC1/NDUFAF2/OS9/MDFIC/DNAJA1/JAGN1
GO:0007626	locomotory behavior	17/1382	194/17913	0.328027	0.568042	17	APOE/CXCL12/SELENOP/CHL1/EPS8/ZFHX3/LGI4/ALDH1A3/SNCG/EGR1/APP/NAV2/SOD1/ANKH/PARK7/C12orf10/HEXB
GO:1902806	regulation of cell cycle G1/S phase transition	17/1382	195/17913	0.335757	0.579622	17	ADAMTS1/FHL1/CCND1/EGFR/GPNMB/KANK2/SOX4/KLF4/PKD1/CCL2/RDX/CDKN1A/PRMT1/RPS27L/PHB2/RPL26/GADD45A
GO:0090276	regulation of peptide hormone secretion	17/1382	199/17913	0.367065	0.613051	17	LRP1/GJA1/SFRP1/RBP4/EGFR/EFNA5/SOX4/TCF7L2/PHPT1/BAD/ARL2/HMGN3/NDUFAF2/SRI/SLC25A6/JAGN1/SLC25A5
GO:0030073	insulin secretion	17/1382	200/17913	0.374972	0.620709	17	LRP1/GJA1/SFRP1/RBP4/EFNA5/SOX4/TCF7L2/PHPT1/BAD/ARL2/PARK7/HMGN3/NDUFAF2/SRI/SLC25A6/JAGN1/SLC25A5
GO:0002526	acute inflammatory response	17/1382	220/17913	0.53402	0.780615	17	CLU/FN1/CFH/SERPING1/VCAM1/C1R/C1S/NUPR1/A2M/OSMR/CD81/IL6ST/CD59/GSTP1/PARK7/PHB/C1QBP
GO:0015931	nucleobase-containing compound transport	17/1382	221/17913	0.541776	0.780615	17	GJA1/MYO1C/SLC29A1/ZFP36L1/PURA/MRPL18/RAN/SSB/PHAX/SLC25A6/EIF5A/RTRAF/RFTN1/HNRNPA1/SRSF7/ZFP36/SLC25A5
GO:0140014	mitotic nuclear division	17/1382	237/17913	0.658914	0.837699	17	PDGFRB/CDKN1C/EPS8/CAV2/HSPA1B/NFE2L1/BOD1/IGF1/HSPA1A/CHMP5/RPL24/SPHK1/RAN/PSMG2/PHB2/FLNA/CDC26
GO:0006959	humoral immune response	17/1382	276/17913	0.863868	0.944339	17	CLU/PLA2G2A/CFH/SERPING1/C1R/C1S/RARRES2/A2M/CFD/CD81/CCL2/CD59/MEF2C/PDZD11/PHB/RPS19/C1QBP
GO:0015849	organic acid transport	17/1382	293/17913	0.915847	0.967685	17	APOE/PLA2G2A/NTRK2/AGT/PDPN/SLC7A2/AKR1C1/PPFIA2/PLA2R1/THBS1/STXBP1/NFE2L1/SLC1A3/MIF/ATP5PF/ARL6IP5/PLIN2
GO:0046942	carboxylic acid transport	17/1382	293/17913	0.915847	0.967685	17	APOE/PLA2G2A/NTRK2/AGT/PDPN/SLC7A2/AKR1C1/PPFIA2/PLA2R1/THBS1/STXBP1/NFE2L1/SLC1A3/MIF/ATP5PF/ARL6IP5/PLIN2
GO:0002460	adaptive immune response based on somatic recombination of immune receptors built from immunoglobulin superfamily domains	17/1382	295/17913	0.920712	0.969131	17	CLU/SERPING1/C1R/C1S/EMP2/TMEM98/IL1R1/JAG1/CD81/NECTIN2/KDELR1/MEF2C/SMAD7/HSPD1/ERCC1/C1QBP/RFTN1
GO:0035904	aorta development	16/1382	57/17913	4.02348e-06	9.72107e-05	16	COL3A1/LRP1/PDGFRB/HES1/LTBP1/LOX/TBX2/HEY2/SIX1/JAG1/MYLK/SOX4/ADAMTS9/ENG/MYH10/PLXND1
GO:0070527	platelet aggregation	16/1382	58/17913	5.16143e-06	0.000119509	16	MYL9/SERPINE2/GAS6/PDGFRA/C1QTNF1/PDPN/PRKG1/CSRP1/CD9/HSPB1/COMP/STXBP1/ILK/GNAS/FLNA/ACTG1
GO:0003170	heart valve development	16/1382	61/17913	1.04955e-05	0.000209045	16	EMILIN1/SLIT2/SLIT3/TWIST1/SNAI2/SOX9/HEY2/SHOX2/JAG1/SOX4/ADAMTS9/SNAI1/ROCK2/BMPR2/TNFRSF1A/MEF2C
GO:0035924	cellular response to vascular endothelial growth factor stimulus	16/1382	65/17913	2.49885e-05	0.000427265	16	DCN/FOXC1/VCAM1/PDGFRB/PDGFRA/NRP2/SMOC2/GAS1/NRP1/ADGRA2/HSPB1/CD63/MYO1C/SPHK1/NR4A1/VEGFA
GO:0050772	positive regulation of axonogenesis	16/1382	72/17913	9.49404e-05	0.0013124	16	FN1/CXCL12/LRP1/MAP1B/NTRK2/SLIT2/NRP1/NGFR/EFNA5/SHOX2/TNFRSF12A/BMPR2/ILK/METRN/STK25/VEGFA
GO:1900046	regulation of hemostasis	16/1382	75/17913	0.000158287	0.00205995	16	APOE/SERPINE2/SERPING1/CAV1/PDGFRA/TFPI/C1QTNF1/PDPN/PDGFA/PRKG1/FAP/CD9/COMP/THBS1/VKORC1/PRDX2
GO:0060411	cardiac septum morphogenesis	16/1382	77/17913	0.000218618	0.00268181	16	HES1/NRP2/BMP5/SLIT2/SLIT3/PARVA/NRP1/TBX2/HEY2/JAG1/SOX4/SAV1/ENG/BMPR2/DHRS3/SMAD7
GO:0050818	regulation of coagulation	16/1382	79/17913	0.000297952	0.00342799	16	APOE/SERPINE2/SERPING1/CAV1/PDGFRA/TFPI/C1QTNF1/PDPN/PDGFA/PROCR/PRKG1/FAP/CD9/THBS1/VKORC1/PRDX2
GO:0110110	positive regulation of animal organ morphogenesis	16/1382	80/17913	0.000346188	0.00382459	16	FGFR1/PTN/FGF7/MDK/AGT/TWIST1/CSF1/SOX9/SIX1/JAG1/ENG/MAGED1/SPRY1/MYC/CTNNB1/VEGFA
GO:0030510	regulation of BMP signaling pathway	16/1382	81/17913	0.000401008	0.00428681	16	SFRP4/HTRA1/FBN1/HES1/NBL1/SFRP1/SULF1/CHRDL1/NEO1/FOXD1/TWSG1/ENG/BMPR2/ILK/SMAD7/TOB1
GO:0060021	roof of mouth development	16/1382	87/17913	0.000912715	0.00826051	16	PDGFRA/PRRX1/DLX5/TWIST1/SATB2/SNAI2/TBX2/DLX6/ASPH/SNAI1/ARID5B/DHRS3/MEF2C/COL2A1/INSIG2/INHBA
GO:1904035	regulation of epithelial cell apoptotic process	16/1382	88/17913	0.00103718	0.00920702	16	SFRP4/ANGPTL4/NUPR1/GAS6/MDK/ANGPT1/NDNF/TCF7L2/COL18A1/THBS1/CCL2/GSN/ZFP36L1/BAD/AKR1C3/ZFP36
GO:0001523	retinoid metabolic process	16/1382	91/17913	0.00150004	0.0122225	16	APOE/LRP1/CYP1B1/RARRES2/LPL/SDC2/RBP4/HSPG2/AKR1C1/ALDH1A3/RBP1/GPC1/SDC4/DHRS3/AKR1C3/ADH5
GO:0007009	plasma membrane organization	16/1382	91/17913	0.00150004	0.0122225	16	CLU/CAV1/COL5A1/CAV2/EHD2/PLSCR4/A4GALT/ANK2/MYOF/NDRG1/SOD1/WASL/GSN/MYH10/SNX9/ATP2A2
GO:0007030	Golgi organization	16/1382	94/17913	0.00212535	0.0161127	16	DYNC2H1/CAMSAP2/PDE4DIP/ARHGAP21/ARL1/TRIP11/ATL3/LMAN1/TMED9/STK25/RAB2A/OPTN/USO1/TMED2/AKAP9/SURF4
GO:0048709	oligodendrocyte differentiation	16/1382	94/17913	0.00212535	0.0161127	16	CLU/ID4/PTN/MDK/HES1/NTRK2/TMEM98/DAAM2/WASF3/CD9/BNIP3/GSN/GSTP1/CTNNB1/RHEB/EIF2B1
GO:0042472	inner ear morphogenesis	16/1382	95/17913	0.00237685	0.0176344	16	FRZB/FGFR1/COL11A1/PRRX1/DLX5/SOX9/ALDH1A3/DLX6/SIX1/MAFB/SOD1/CTHRC1/ITGA8/COL2A1/ZEB1/INSIG2
GO:2000379	positive regulation of reactive oxygen species metabolic process	16/1382	101/17913	0.00445902	0.0288461	16	CLU/PDGFRB/AGT/EGFR/THBS1/DDAH2/KLF4/SOD1/HSP90AB1/AKR1C3/CDKN1A/GSTP1/PARK7/HSP90AA1/KLF2/GADD45A
GO:0032526	response to retinoic acid	16/1382	103/17913	0.00541814	0.0334513	16	COL1A1/IGFBP7/SERPINF1/TNC/PDGFRB/GJA1/RBP4/YAP1/SOX9/EPHA3/KLF4/ABL2/IGFBP2/PHB2/YES1/NDUFA13
GO:0030330	DNA damage response, signal transduction by p53 class mediator	16/1382	106/17913	0.00716438	0.041952	16	TWIST1/MYO6/SNAI2/PLA2R1/SPRED1/SOX4/NDRG1/SNAI1/PTTG1IP/CDKN1A/HIC1/MIF/PRMT1/RPS27L/RPL26/GADD45A
GO:0048593	camera-type eye morphogenesis	16/1382	109/17913	0.00933627	0.0511149	16	PTN/THY1/COL8A1/RBP4/TWIST1/SOX9/TBX2/ALDH1A3/FAT1/JAG1/ABI2/C12orf57/AHI1/CTNNB1/ZEB1/VEGFA
GO:1903052	positive regulation of proteolysis involved in cellular protein catabolic process	16/1382	109/17913	0.00933627	0.0511149	16	CLU/NUPR1/CAV1/DAB2/PTK2/MAGEF1/HSPA1A/PSMC3/RACK1/SMAD7/NOP53/STUB1/PSMC5/PSMC1/SUMO2/PSMC4
GO:0030218	erythrocyte differentiation	16/1382	112/17913	0.0120011	0.0611274	16	EPAS1/RBFOX2/MAFB/HSPA1B/THRA/NFE2L1/TMEM14C/SMAD5/ZFP36L1/HSPA1A/PRMT1/RPS19/VEGFA/INHBA/KLF2/ZFP36
GO:0002223	stimulatory C-type lectin receptor signaling pathway	16/1382	113/17913	0.013011	0.0650197	16	PSMB5/PSMC3/PSMB6/PSMB1/SKP1/PSMD8/PSMD2/PSMA3/PSMC5/PSMD3/PSMB7/PSMC1/PSMA2/PSMA1/PSMC4/PSME2
GO:0043666	regulation of phosphoprotein phosphatase activity	16/1382	113/17913	0.013011	0.0650197	16	PDGFRB/PTN/RCAN2/IGFBP3/ITGA1/PPP1R14A/BOD1/ROCK2/HSP90AB1/LGALS3/RCAN1/CALM2/PPP1R14B/PPP1R15A/HSP90B1/SET
GO:0002220	innate immune response activating cell surface receptor signaling pathway	16/1382	116/17913	0.0164426	0.0767183	16	PSMB5/PSMC3/PSMB6/PSMB1/SKP1/PSMD8/PSMD2/PSMA3/PSMC5/PSMD3/PSMB7/PSMC1/PSMA2/PSMA1/PSMC4/PSME2
GO:0002761	regulation of myeloid leukocyte differentiation	16/1382	117/17913	0.0177294	0.0821242	16	BGLAP/FBN1/SFRP1/CSF1/KITLG/MAFB/JUN/ZFP36L1/MYC/TOB2/CTNNB1/GNAS/KLF10/NME1/INHBA/FOS
GO:0033135	regulation of peptidyl-serine phosphorylation	16/1382	119/17913	0.0205335	0.0913566	16	GAS6/CAV1/NTRK2/ANGPT1/PFN2/EGFR/APP/HSP90AB1/MIF/PARK7/RACK1/SMAD7/HSP90AA1/VEGFA/AKAP9/DDIT4
GO:1905477	positive regulation of protein localization to membrane	16/1382	120/17913	0.0220561	0.0963459	16	LRP1/PTN/EPHA3/EGFR/CD81/ITGB1/MYO1C/YWHAE/BAD/YWHAQ/PDCD5/LGALS3/FIS1/RER1/RACK1/SQSTM1
GO:0030010	establishment of cell polarity	16/1382	126/17913	0.0330446	0.129773	16	MAP1B/HES1/JAM3/PARD3/FEZ1/PTK2/PKD1/GSN/ROCK2/HSP90AB1/MAP4/SPRY1/FSCN1/RACK1/HSP90AA1/FAM89B
GO:0071333	cellular response to glucose stimulus	16/1382	128/17913	0.0374734	0.138642	16	LGALS1/SERPINF1/LRP1/GAS6/EFNA5/SOX4/ZBTB20/PHPT1/BAD/HMGN3/FIS1/NDUFAF2/RACK1/SRI/NME1/JAGN1
GO:0006165	nucleoside diphosphate phosphorylation	16/1382	129/17913	0.0398421	0.145277	16	NUPR1/AK1/NME3/ZBTB20/NME4/IGF1/LDHA/TPI1/NME1/EIF6/PKM/CMPK1/PFKP/PGAM1/DDIT4/ENO1
GO:0046683	response to organophosphorus	16/1382	130/17913	0.0423166	0.153294	16	COL1A1/SPARC/IGFBP5/CDO1/AKR1C1/APP/SOD1/ZFP36L1/NDUFS4/FOSB/NME1/AKAP9/HSPA5/HSP90B1/FOS/AHR
GO:0071331	cellular response to hexose stimulus	16/1382	130/17913	0.0423166	0.153294	16	LGALS1/SERPINF1/LRP1/GAS6/EFNA5/SOX4/ZBTB20/PHPT1/BAD/HMGN3/FIS1/NDUFAF2/RACK1/SRI/NME1/JAGN1
GO:0007224	smoothened signaling pathway	16/1382	131/17913	0.0448989	0.160124	16	SERPINE2/PRRX1/HES1/RAB34/ENPP1/SFRP1/GAS1/BOC/INTU/DYNC2H1/SHOX2/RUNX2/TULP3/ARL3/CTNNA1/IFT57
GO:0042770	signal transduction in response to DNA damage	16/1382	131/17913	0.0448989	0.160124	16	TWIST1/MYO6/SNAI2/PLA2R1/SPRED1/SOX4/NDRG1/SNAI1/PTTG1IP/CDKN1A/HIC1/MIF/PRMT1/RPS27L/RPL26/GADD45A
GO:0046939	nucleotide phosphorylation	16/1382	131/17913	0.0448989	0.160124	16	NUPR1/AK1/NME3/ZBTB20/NME4/IGF1/LDHA/TPI1/NME1/EIF6/PKM/CMPK1/PFKP/PGAM1/DDIT4/ENO1
GO:0071326	cellular response to monosaccharide stimulus	16/1382	131/17913	0.0448989	0.160124	16	LGALS1/SERPINF1/LRP1/GAS6/EFNA5/SOX4/ZBTB20/PHPT1/BAD/HMGN3/FIS1/NDUFAF2/RACK1/SRI/NME1/JAGN1
GO:0048565	digestive tract development	16/1382	132/17913	0.0475912	0.163755	16	COL3A1/RARRES2/PDGFRA/HES1/SFRP1/CLMP/TBX2/EGFR/SHOX2/PDGFC/SAV1/AHI1/PKD1/PCSK5/CDKN1A/CTNNB1
GO:0050880	regulation of blood vessel size	16/1382	133/17913	0.0503953	0.171049	16	APOE/ACTA2/FOXC1/CAV1/GJA1/FOXC2/AGT/EDNRA/PRKG1/EGFR/ITGA1/COMP/SOD1/ROCK2/BMPR2/GUCY1A1
GO:0035150	regulation of tube size	16/1382	134/17913	0.053313	0.177438	16	APOE/ACTA2/FOXC1/CAV1/GJA1/FOXC2/AGT/EDNRA/PRKG1/EGFR/ITGA1/COMP/SOD1/ROCK2/BMPR2/GUCY1A1
GO:0038127	ERBB signaling pathway	16/1382	138/17913	0.0661527	0.20436	16	ERRFI1/EFEMP1/AGT/SOX9/EGFR/GPRC5A/ITGA1/APP/SPRY1/SHC1/MVB12A/CAMLG/ARF4/HSP90AA1/STUB1/IFI6
GO:0008203	cholesterol metabolic process	16/1382	143/17913	0.0849305	0.243278	16	APOE/LEPR/LIMA1/APP/CYB5R3/NFE2L1/SOD1/ACADVL/HDLBP/CES1/INSIG2/ACAA2/RAN/MBTPS1/CNBP/FDPS
GO:0006633	fatty acid biosynthetic process	16/1382	144/17913	0.0890593	0.24907	16	PTGDS/LPL/PDK4/PTGIS/FADS3/HACD3/MGLL/ACADVL/GPX4/AKR1C3/CBR1/MIF/INSIG2/PTGES3/NDUFAB1/EIF6
GO:0000187	activation of MAPK activity	16/1382	147/17913	0.102201	0.277161	16	MAPK10/GHR/CSPG4/ITGA1/CD81/THBS1/SOD1/HACD3/MAP3K20/IGF1/PRDX2/SHC1/PEA15/MDFIC/RPS27A/UBB
GO:0006090	pyruvate metabolic process	16/1382	147/17913	0.102201	0.277161	16	NUPR1/PDK4/ZBTB20/IGF1/LDHA/GLO1/TPI1/VDAC1/LDHB/EIF6/PKM/MPC1/PFKP/PGAM1/DDIT4/ENO1
GO:1905952	regulation of lipid localization	16/1382	151/17913	0.121489	0.309403	16	APOE/LRP1/LPL/C1QTNF1/AGT/PLA2R1/ANXA2/HILPDA/PLTP/ITGAV/THBS1/SPP1/MIF/ATP5PF/ALKBH7/PRELID1
GO:0071346	cellular response to interferon-gamma	16/1382	153/17913	0.131884	0.329829	16	MT2A/VCAM1/NCAM1/CDC42EP4/SOCS3/VIM/STXBP1/MYO1C/CCL2/GSN/CAMK2D/HSP90AB1/FLNB/TRIM8/RPL13A/ACTG1
GO:1901568	fatty acid derivative metabolic process	16/1382	154/17913	0.137266	0.340227	16	CYP1B1/GGT5/PTGDS/BDH2/AKR1C2/PTGR1/PTGIS/MGST3/TNFRSF1A/PON2/MGLL/GPX4/AKR1C3/CBR1/MIF/PTGES3
GO:0035821	modification of morphology or physiology of other organism	16/1382	160/17913	0.172081	0.396472	16	APOE/CAV2/ANXA2/ITGAV/JUN/NUCKS1/PPIB/BAD/RRAGA/IFI27/PSMC3/CALM2/SUGT1/SLC25A6/RPS19/HSPA8
GO:0051302	regulation of cell division	16/1382	162/17913	0.184608	0.407412	16	PTN/FGF7/MDK/PGF/PDGFA/INTU/PDGFC/VEGFB/PDGFD/MYC/RACK1/YBX1/CALM2/VEGFA/LBH/TXNIP
GO:0030307	positive regulation of cell growth	16/1382	166/17913	0.21095	0.440033	16	FN1/CXCL12/LRP1/MAP1B/SFRP1/MMP14/NRP1/EGFR/EFNA5/TNFRSF12A/BMPR2/ILK/IGF1/SPHK1/VEGFA/DNPH1
GO:0050796	regulation of insulin secretion	16/1382	169/17913	0.231757	0.466799	16	LRP1/GJA1/SFRP1/RBP4/EFNA5/SOX4/TCF7L2/PHPT1/BAD/ARL2/HMGN3/NDUFAF2/SRI/SLC25A6/JAGN1/SLC25A5
GO:0050728	negative regulation of inflammatory response	16/1382	170/17913	0.238878	0.469227	16	APOE/SERPINF1/APOD/MDK/NT5E/PTGIS/SOCS3/KLF4/SOD1/TNFRSF1A/IGF1/GSTP1/CUEDC2/RPS19/TNFAIP6/PSMA1
GO:0001659	temperature homeostasis	16/1382	172/17913	0.25338	0.491118	16	LEPR/EPAS1/ID1/CAV1/GJA1/LAMA4/FOXC2/DIO2/ADAMTS5/EGR1/PDGFC/THRA/ACADVL/GNAS/RHEB/VEGFA
GO:2000045	regulation of G1/S transition of mitotic cell cycle	16/1382	177/17913	0.291007	0.534835	16	ADAMTS1/FHL1/CCND1/EGFR/GPNMB/KANK2/SOX4/KLF4/PKD1/CCL2/RDX/CDKN1A/PRMT1/RPS27L/RPL26/GADD45A
GO:0016052	carbohydrate catabolic process	16/1382	185/17913	0.354384	0.595205	16	NUPR1/SCARB2/ZBTB20/BAD/IGF1/LDHA/TPI1/EIF6/PKM/HEXB/PFKP/AKR1A1/PGAM1/NUDT5/DDIT4/ENO1
GO:0051224	negative regulation of protein transport	16/1382	189/17913	0.387041	0.632213	16	FN1/APOE/APOD/GAS6/SFRP1/ANGPT1/BAG3/PKIG/PARK7/NDFIP1/LMAN1/ERLEC1/NDUFAF2/OS9/MDFIC/JAGN1
GO:0017148	negative regulation of translation	16/1382	198/17913	0.461359	0.710103	16	IGFBP5/ANG/ZFP36L1/ROCK2/PURA/CALR/CIRBP/RACK1/EIF6/TOB1/NCL/RPS3/HNRNPR/RPL13A/ZFP36/EIF4EBP1
GO:0050870	positive regulation of T cell activation	16/1382	198/17913	0.461359	0.710103	16	LGALS1/VCAM1/CAV1/THY1/MDK/HES1/CD276/CD81/IL6ST/CCL2/BAD/IGF1/IGFBP2/YES1/HSPD1/RPS3
GO:0071216	cellular response to biotic stimulus	16/1382	206/17913	0.526696	0.775119	16	TFPI/AXL/SASH1/PLSCR4/VIM/CCL2/GSTP1/MIF/PRDX2/MEF2C/CHMP5/CAPN2/TMCO1/TXNIP/HSPA5/ZFP36
GO:0007601	visual perception	16/1382	209/17913	0.550661	0.780615	16	COL1A1/LUM/CYP1B1/TIMP3/COL11A1/EPAS1/EFEMP1/RBP4/LAMB2/TGFBI/COL18A1/RGS16/DHRS3/COL2A1/OAT/DNAJC19
GO:0050953	sensory perception of light stimulus	16/1382	213/17913	0.581957	0.801565	16	COL1A1/LUM/CYP1B1/TIMP3/COL11A1/EPAS1/EFEMP1/RBP4/LAMB2/TGFBI/COL18A1/RGS16/DHRS3/COL2A1/OAT/DNAJC19
GO:1903039	positive regulation of leukocyte cell-cell adhesion	16/1382	214/17913	0.589647	0.803696	16	LGALS1/VCAM1/CAV1/THY1/MDK/HES1/CD276/CD81/IL6ST/CCL2/BAD/IGF1/IGFBP2/YES1/HSPD1/RPS3
GO:0042113	B cell activation	16/1382	215/17913	0.597278	0.812701	16	LGALS1/VCAM1/SFRP1/MMP14/CD81/PAWR/ITGB1/ZFP36L1/BAD/CDKN1A/MIF/MEF2C/HSPD1/ERCC1/INHBA/AHR
GO:0098742	cell-cell adhesion via plasma-membrane adhesion molecules	16/1382	233/17913	0.722479	0.86618	16	SPARCL1/VCAM1/PCDH18/FAT1/PTPRD/FAT3/EFNA5/CADM1/ITGB1/KLF4/PKD1/PLXNB2/NECTIN2/PCDH9/KIFAP3/CLSTN1
GO:0009108	coenzyme biosynthetic process	16/1382	245/17913	0.790929	0.905852	16	NNMT/NUPR1/PDK4/PTGIS/ZBTB20/IGF1/LDHA/PTS/TPI1/EIF6/PKM/MPC1/PFKP/PGAM1/DDIT4/ENO1
GO:0006650	glycerophospholipid metabolic process	16/1382	300/17913	0.95846	0.985961	16	PLA2G2A/PDGFRB/PTPN13/ENPP2/PDGFA/PLEKHA4/DBI/MTMR2/PRDX6/CAPN2/HADHB/DPM3/PIGP/STOML2/PYURF/HADHA
GO:0010463	mesenchymal cell proliferation	15/1382	45/17913	7.1317e-07	2.20171e-05	15	LMNA/FGFR1/PTN/FGF7/PRRX1/NFIB/SOX9/PDGFA/SIX1/SHOX2/MYC/CTNNB1/ZEB1/PHF14/VEGFA
GO:2001238	positive regulation of extrinsic apoptotic signaling pathway	15/1382	49/17913	2.42744e-06	6.24505e-05	15	TIMP3/CAV1/SFRP1/AGT/SRPX/LTBR/TNFRSF12A/THBS1/ATF3/TNFSF12/CTNNA1/PDIA3/PEA15/ITM2C/INHBA
GO:0010718	positive regulation of epithelial to mesenchymal transition	15/1382	50/17913	3.22197e-06	8.10159e-05	15	COL1A1/FOXC1/MDK/TGFB1I1/PDPN/WWTR1/TWIST1/BAMBI/ZNF703/JAG1/DAB2/TCF7L2/ENG/SNAI1/CTNNB1
GO:0007566	embryo implantation	15/1382	52/17913	5.53819e-06	0.000125615	15	IGFBP7/TIMP1/FBLN1/EMP2/MMP2/SYDE1/PTGIS/CST3/PCSK5/SOD1/SPP1/CALR/RPL29/FKBP4/C1QBP
GO:0006027	glycosaminoglycan catabolic process	15/1382	61/17913	4.50606e-05	0.000699446	15	DCN/LUM/BGN/PRELP/FMOD/ACAN/OGN/SDC2/OMD/HSPG2/CSPG4/GPC1/SDC4/VCAN/HEXB
GO:0038034	signal transduction in absence of ligand	15/1382	62/17913	5.52473e-05	0.000829754	15	FGFR1/UNC5B/SNAI2/KITLG/SRPX/HSPA1B/BAG3/ITGAV/CTNNA1/BAD/HSPA1A/PRDX2/COL2A1/INHBA/IFI6
GO:0097192	extrinsic apoptotic signaling pathway in absence of ligand	15/1382	62/17913	5.52473e-05	0.000829754	15	FGFR1/UNC5B/SNAI2/KITLG/SRPX/HSPA1B/BAG3/ITGAV/CTNNA1/BAD/HSPA1A/PRDX2/COL2A1/INHBA/IFI6
GO:0006026	aminoglycan catabolic process	15/1382	63/17913	6.73975e-05	0.000980439	15	DCN/LUM/BGN/PRELP/FMOD/ACAN/OGN/SDC2/OMD/HSPG2/CSPG4/GPC1/SDC4/VCAN/HEXB
GO:0014033	neural crest cell differentiation	15/1382	70/17913	0.000238813	0.00280107	15	FN1/FOXC1/FRZB/HES1/NRP2/SFRP1/FOXC2/TWIST1/NRP1/SNAI2/SOX9/KITLG/EDNRA/JAG1/MEF2C
GO:0006081	cellular aldehyde metabolic process	15/1382	72/17913	0.00033059	0.00368893	15	CYP1B1/BMP5/DKK3/AKR1C1/ALDH1A3/ALDH7A1/ESD/AKR1C3/PARK7/PNKD/GLO1/TPI1/GRHPR/AKR1A1/PGAM1
GO:0035019	somatic stem cell population maintenance	15/1382	72/17913	0.00033059	0.00368893	15	HES1/SFRP1/YAP1/SOX9/SOX4/PBX1/KLF4/POLR2F/POLR2H/KLF10/POLR2E/POLR2I/LBH/POLR2L/POLR2K
GO:0061045	negative regulation of wound healing	15/1382	73/17913	0.000386864	0.00416712	15	APOE/SERPINE2/SERPING1/PDGFRA/TFPI/GJA1/C1QTNF1/PDGFA/PRKG1/FAP/CD9/THBS1/CD109/PHLDB2/CDKN1A
GO:0006278	RNA-dependent DNA biosynthetic process	15/1382	74/17913	0.000451156	0.00464273	15	HSP90AB1/CTNNB1/CCT3/PTGES3/CCT7/NHP2/HSP90AA1/CCT4/TCP1/PPIA/CCT6A/HNRNPA1/CCT2/CCT8/CCT5
GO:0030193	regulation of blood coagulation	15/1382	74/17913	0.000451156	0.00464273	15	APOE/SERPINE2/SERPING1/CAV1/PDGFRA/TFPI/C1QTNF1/PDPN/PDGFA/PRKG1/FAP/CD9/THBS1/VKORC1/PRDX2
GO:0055072	iron ion homeostasis	15/1382	74/17913	0.000451156	0.00464273	15	EPAS1/CP/TF/CYBRD1/SCARA5/BDH2/STEAP1/NEO1/SOD1/MYC/NDFIP1/SKP1/STEAP4/SRI/NEDD8
GO:0001570	vasculogenesis	15/1382	78/17913	0.000807758	0.00751878	15	PDGFRB/EMP2/CAV1/NTRK2/ACKR3/YAP1/HEY2/SPRED1/PTK2/ITGAV/ENG/ZFP36L1/CTNNB1/JUNB/VEGFA
GO:0046849	bone remodeling	15/1382	81/17913	0.00121141	0.0104857	15	LEPR/BGLAP/PTN/MDK/GJA1/PTH1R/CTSK/SFRP1/PDK4/TMEM119/TNFRSF11B/EGFR/P3H4/CTHRC1/CTNNB1
GO:0055006	cardiac cell development	15/1382	84/17913	0.00177263	0.0139723	15	LMNA/PDGFRB/PDGFRA/SGCB/SORBS2/AGT/HEY2/JAG1/PDLIM5/MYH11/MYH10/IGF1/SPRY1/MEF2A/VEGFA
GO:0031532	actin cytoskeleton reorganization	15/1382	85/17913	0.00200217	0.0154744	15	FGF7/PDGFRA/MDK/EPS8/CTTN/PDLIM4/NRP1/ANTXR1/CDC42BPA/GSN/PHPT1/SHC1/ABL2/RALA/FLNA
GO:0001892	embryonic placenta development	15/1382	87/17913	0.00253574	0.0185409	15	EPAS1/CDKN1C/HES1/NR2F2/MDFI/BMP5/HEY2/EGFR/SOCS3/PHLDA2/PKD1/SNAI1/ZFP36L1/JUNB/TMED2
GO:0097306	cellular response to alcohol	15/1382	88/17913	0.00284366	0.0204427	15	TNC/SFRP1/AKR1C2/PTGFR/EFNA5/KLF9/KLF4/ADCY3/NFE2L1/CTNNA1/AKR1C3/CTNNB1/INHBA/KLF2/AHR
GO:0030901	midbrain development	15/1382	90/17913	0.0035522	0.0243999	15	FGFR1/HES1/S100A1/SFRP1/CKB/NDRG2/DYNLL1/YWHAE/RYK/YWHAQ/CTNNB1/ATP5PF/CALM2/UQCRQ/HSPA5
GO:0061387	regulation of extent of cell growth	15/1382	90/17913	0.0035522	0.0243999	15	FN1/APOE/CXCL12/LRP1/MAP1B/CTTN/NRP1/EFNA5/TNFRSF12A/BMPR2/SPP1/ILK/RYK/DPYSL2/VEGFA
GO:0032231	regulation of actin filament bundle assembly	15/1382	94/17913	0.0054036	0.0334014	15	TPM1/ID1/RHOC/SFRP1/LIMCH1/DLC1/NRP1/PFN2/SORBS3/SDC4/S100A10/PHLDB2/ROCK2/RDX/FLNA
GO:2001243	negative regulation of intrinsic apoptotic signaling pathway	15/1382	94/17913	0.0054036	0.0334014	15	CLU/CXCL12/ACKR3/SNAI2/HSPB1/SNAI1/YBX3/PTTG1IP/MIF/PARK7/HSPA1A/VDAC2/NDUFA13/DNAJA1/ENO1
GO:0034766	negative regulation of ion transmembrane transport	15/1382	97/17913	0.00724993	0.0423637	15	CAV1/GEM/TWIST1/PLN/THBS1/RRAD/CAMK2D/YWHAE/SESTD1/YWHAQ/SRI/ARL6IP5/CALM2/ISCU/GSTO1
GO:0070301	cellular response to hydrogen peroxide	15/1382	99/17913	0.0087387	0.0485324	15	CYP1B1/AXL/RHOB/CST3/PAWR/KLF4/BNIP3/PDGFD/NET1/PARK7/SPHK1/RACK1/STK25/RPS3/KLF2
GO:0098869	cellular oxidant detoxification	15/1382	99/17913	0.0087387	0.0485324	15	APOE/CYGB/GPX3/GPX8/PRDX4/SELENOW/MGST3/SOD1/GPX4/GSTP1/PARK7/PRDX2/PRDX6/PRDX3/GSTO1
GO:0006690	icosanoid metabolic process	15/1382	102/17913	0.0114154	0.059341	15	CYP1B1/GGT5/PTGDS/AKR1C2/PTGR1/PTGIS/MGST3/TNFRSF1A/PON2/MGLL/GPX4/AKR1C3/CBR1/MIF/PTGES3
GO:0031623	receptor internalization	15/1382	102/17913	0.0114154	0.059341	15	SFRP4/LRP1/CAV1/ACKR3/ANGPT1/RAMP1/CD9/CD81/CD63/ITGB1/AHI1/MTMR2/LRPAP1/VEGFA/AP2M1
GO:0006606	protein import into nucleus	15/1382	103/17913	0.0124377	0.0631039	15	LMNA/APOD/AGT/ANGPT1/BAG3/PKIG/PTTG1IP/CDKN1A/RAN/MBTPS1/MDFIC/PHB2/CBLB/FLNA/TXNIP
GO:0051341	regulation of oxidoreductase activity	15/1382	105/17913	0.0146952	0.0711957	15	APOE/CAV1/S100A1/CYGB/AGT/EGFR/AOC3/DDAH2/WASL/PARK7/CHCHD10/ABL2/PHB2/HSP90AA1/CCS
GO:0032434	regulation of proteasomal ubiquitin-dependent protein catabolic process	15/1382	110/17913	0.0217234	0.0949778	15	CLU/CAV1/MAP1A/DAB2/HSP90AB1/PARK7/HSPA1A/RACK1/CAMLG/SMAD7/RPL11/NOP53/STUB1/UBXN1/SUMO2
GO:0051817	modification of morphology or physiology of other organism involved in symbiotic interaction	15/1382	113/17913	0.02701	0.111429	15	APOE/CAV2/ANXA2/ITGAV/JUN/NUCKS1/PPIB/BAD/RRAGA/IFI27/PSMC3/CALM2/SUGT1/SLC25A6/HSPA8
GO:0051101	regulation of DNA binding	15/1382	120/17913	0.042967	0.155549	15	FOXC1/HES1/MDFI/TWIST1/HEY2/KLF4/JUN/IGF1/PARK7/CTNNB1/EDF1/IFI16/SRI/CALM2/NME1
GO:0007498	mesoderm development	15/1382	128/17913	0.0682905	0.210361	15	FOXC1/FGFR1/FOXC2/IRX3/YAP1/TWSG1/ITGB1/KLF4/SNAI1/EXT2/ZFP36L1/BMPR2/ITGA8/VEGFA/INHBA
GO:0030833	regulation of actin filament polymerization	15/1382	129/17913	0.0720338	0.218875	15	EPS8/SLIT2/CTTN/CDC42EP5/NCKAP1/PFN2/LMOD1/SCIN/KIRREL1/ABI2/MYO1C/WASL/GSN/RDX/SNX9
GO:0007033	vacuole organization	15/1382	131/17913	0.07992	0.233622	15	NUPR1/RAB34/SYNPO2/SRPX/FEZ1/ANXA2/BAG3/LAPTM4B/SCARB2/CHMP5/MBTPS1/TMEM165/HEXB/RNF5/ATG101
GO:0048813	dendrite morphogenesis	15/1382	131/17913	0.07992	0.233622	15	ID1/PTN/SDC2/RBFOX2/FARP1/NRP1/PTPRD/DCLK1/ABI2/ITGB1/PDLIM5/WASL/ILK/TMEM106B/MEF2A
GO:0060048	cardiac muscle contraction	15/1382	132/17913	0.0840647	0.242691	15	TPM1/CAV1/GJA1/PLN/PDE5A/ANK2/VEGFB/SMAD5/CAMK2D/SMAD7/SRI/CALM2/GSTO1/ATP1A1/FLNA
GO:1901657	glycosyl compound metabolic process	15/1382	132/17913	0.0840647	0.242691	15	AKR1C1/NT5E/AKR1C2/NME3/NME4/AKR1C3/ADK/ERH/RAN/NME1/CMPK1/IMPDH2/AKR1A1/DNPH1/APRT
GO:0007605	sensory perception of sound	15/1382	139/17913	0.11688	0.304787	15	COL1A1/FGFR1/COL11A1/MYO6/SNAI2/ALDH7A1/SIX1/NAV2/SLC1A3/SOD1/COL2A1/SERPINB6/TIMM8B/HEXB/TIMM13
GO:0007612	learning	15/1382	142/17913	0.132972	0.332251	15	PTN/NTRK2/AGT/SYNPO/NRXN2/MAP1A/ITGB1/APP/ADCY3/COMT/JUN/VDAC1/ARF4/VDAC3/FOS
GO:0014074	response to purine-containing compound	15/1382	145/17913	0.150253	0.362471	15	COL1A1/SPARC/IGFBP5/CDO1/APP/SOD1/ZFP36L1/NDUFS4/FOSB/NME1/AKAP9/HSPA5/HSP90B1/FOS/AHR
GO:0042129	regulation of T cell proliferation	15/1382	149/17913	0.175075	0.396472	15	VCAM1/HES1/PDE5A/CD276/GPNMB/TWSG1/SDC4/CD81/IL6ST/PAWR/IGF1/LGALS3/CTNNB1/IGFBP2/RPS3
GO:0045931	positive regulation of mitotic cell cycle	15/1382	154/17913	0.208778	0.43698	15	FGFR1/PDGFRB/HES1/ADAMTS1/CCND1/SMOC2/EGFR/SMARCD3/PBX1/APP/IGF1/RDX/SPHK1/PHB2/EIF4EBP1
GO:0032874	positive regulation of stress-activated MAPK cascade	15/1382	155/17913	0.215851	0.447418	15	FZD8/SASH1/LTBR/APP/GADD45B/HACD3/MAP3K20/PRMT1/SPHK1/STK25/MDFIC/ARL6IP5/VEGFA/RPS3/GADD45A
GO:0071695	anatomical structure maturation	15/1382	155/17913	0.215851	0.447418	15	MMP2/CDKN1C/GJA1/FAM20C/LGI4/GLDN/FGFR3/NTN4/ANG/APP/IGF1/CDKN1A/CTNNB1/MTCH1/KLF2
GO:0070304	positive regulation of stress-activated protein kinase signaling cascade	15/1382	156/17913	0.223026	0.455479	15	FZD8/SASH1/LTBR/APP/GADD45B/HACD3/MAP3K20/PRMT1/SPHK1/STK25/MDFIC/ARL6IP5/VEGFA/RPS3/GADD45A
GO:0043535	regulation of blood vessel endothelial cell migration	15/1382	158/17913	0.237677	0.468778	15	APOE/FGFR1/FOXC2/ANGPT1/NRP1/SPRED1/HSPB1/AMOTL1/THBS1/KLF4/AKT3/MEF2C/ANGPT2/VEGFA/ATP5F1B
GO:0009166	nucleotide catabolic process	15/1382	169/17913	0.32419	0.563562	15	NUPR1/NT5E/PDE5A/ZBTB20/IGF1/LDHA/TPI1/EIF6/PKM/PFKP/PGAM1/DNPH1/DDIT4/HINT1/ENO1
GO:2001252	positive regulation of chromosome organization	15/1382	169/17913	0.32419	0.563562	15	LMNA/SNAI2/CTNNB1/CCT3/CCT7/ERCC1/MPHOSPH8/CCT4/VEGFA/TCP1/CCT6A/HNRNPA1/CCT2/CCT8/CCT5
GO:0043123	positive regulation of I-kappaB kinase/NF-kappaB signaling	15/1382	172/17913	0.349097	0.594395	15	LGALS1/S100A13/RHOC/GJA1/LTBR/S100B/TNFRSF1A/CTNNB1/NDFIP1/TFG/TRIM8/CXXC5/DDX1/TGM2/FLNA
GO:1901796	regulation of signal transduction by p53 class mediator	15/1382	179/17913	0.4084	0.653255	15	TWIST1/SNAI2/PLA2R1/SPRED1/SNAI1/PTTG1IP/RPL5/HIC1/MIF/RPL11/HEXIM1/UBB/NOP53/RPL26/RPF2
GO:0016197	endosomal transport	15/1382	188/17913	0.485219	0.736509	15	RHOBTB3/TINAGL1/EHD2/DCLK1/EEA1/LAPTM4B/ARL1/RAB13/CHMP5/SNX9/MVB12A/RPS27A/SQSTM1/UBB/AP1S1
GO:0002221	pattern recognition receptor signaling pathway	15/1382	197/17913	0.560103	0.78947	15	CAV1/S100A1/CTSK/CTSL/COLEC12/HSPA1B/HSPA1A/CTSB/RPS27A/UBB/HSPD1/NOP53/C1QBP/RFTN1/HSP90B1
GO:0034764	positive regulation of transmembrane transport	15/1382	199/17913	0.576235	0.801565	15	THY1/FXYD1/S100A1/AGT/ANK2/CCL2/IGF1/PARK7/CHCHD10/MEF2A/SRI/CALM2/GSTO1/FLNA/AKAP9
GO:0006836	neurotransmitter transport	15/1382	241/17913	0.840409	0.933095	15	PFN2/PPFIA2/NRXN2/SNCG/BACE1/STXBP1/GPM6B/SLC29A1/SLC1A3/PARK7/MEF2C/PNKD/ARL6IP5/ATP2A2/HSPA8
GO:0016569	covalent chromatin modification	15/1382	433/17913	0.999932	1	15	LMNA/TWIST1/SNAI2/COPRS/EID1/CAMK2D/SETD7/CTNNB1/PRMT1/SKP1/PHB/MPHOSPH8/VEGFA/SET/NTMT1
GO:0010464	regulation of mesenchymal cell proliferation	14/1382	34/17913	7.9261e-08	3.36224e-06	14	LMNA/FGFR1/PTN/PRRX1/NFIB/SOX9/PDGFA/SIX1/SHOX2/MYC/CTNNB1/ZEB1/PHF14/VEGFA
GO:1903053	regulation of extracellular matrix organization	14/1382	41/17913	1.20015e-06	3.49175e-05	14	LRP1/AEBP1/EMILIN1/DDR2/AGT/PDPN/SOX9/ANTXR1/FAP/CST3/PHLDB1/PHLDB2/TNFRSF1A/FSCN1
GO:0044273	sulfur compound catabolic process	14/1382	48/17913	9.8384e-06	0.000197372	14	DCN/LUM/BGN/PRELP/FMOD/GGT5/ACAN/OGN/CDO1/OMD/CSPG4/VCAN/HEXB/TXN2
GO:0035272	exocrine system development	14/1382	49/17913	1.28028e-05	0.000249632	14	FOXC1/FGFR1/FGF7/NFIB/NRP1/SNAI2/SOX9/PDGFA/EGFR/NTN4/CST3/TWSG1/PLXND1/TGM2
GO:0003179	heart valve morphogenesis	14/1382	52/17913	2.69401e-05	0.000449568	14	EMILIN1/SLIT2/SLIT3/TWIST1/SNAI2/SOX9/HEY2/JAG1/SOX4/ADAMTS9/SNAI1/ROCK2/BMPR2/MEF2C
GO:0048008	platelet-derived growth factor receptor signaling pathway	14/1382	55/17913	5.32707e-05	0.000811029	14	APOD/LRP1/PDGFRB/PDGFRA/LOX/PDGFRL/NRP1/PDGFA/PDGFC/ARID5B/PHF14/VEGFA/CBLB/TXNIP
GO:0090183	regulation of kidney development	14/1382	57/17913	8.13862e-05	0.00115373	14	PDGFRB/AGT/WWTR1/YAP1/SOX9/PDGFA/FOXD1/SIX1/EGR1/PDGFD/MAGED1/MYC/CTNNB1/VEGFA
GO:1904888	cranial skeletal system development	14/1382	65/17913	0.000360675	0.00392994	14	PDGFRA/PRRX1/FOXC2/MMP14/TWIST1/TBX15/SIX1/RUNX2/TULP3/SLC39A1/MEF2C/CTNNB1/GNAS/INSIG2
GO:0010517	regulation of phospholipase activity	14/1382	66/17913	0.000425757	0.00448944	14	LRP1/FGFR1/PDGFRB/PDGFRA/NTRK2/AGT/EDNRA/FGFR3/EGFR/PLA2R1/ANG/ARL1/ABL2/ARF4
GO:0060675	ureteric bud morphogenesis	14/1382	66/17913	0.000425757	0.00448944	14	HES1/PGF/AGT/SOX9/FOXD1/NPNT/SIX1/PBX1/LZTS2/MAGED1/ILK/MYC/CTNNB1/VEGFA
GO:0007004	telomere maintenance via telomerase	14/1382	67/17913	0.000500591	0.00501223	14	HSP90AB1/CTNNB1/CCT3/PTGES3/CCT7/NHP2/HSP90AA1/CCT4/TCP1/CCT6A/HNRNPA1/CCT2/CCT8/CCT5
GO:0072171	mesonephric tubule morphogenesis	14/1382	67/17913	0.000500591	0.00501223	14	HES1/PGF/AGT/SOX9/FOXD1/NPNT/SIX1/PBX1/LZTS2/MAGED1/ILK/MYC/CTNNB1/VEGFA
GO:0042698	ovulation cycle	14/1382	68/17913	0.000586323	0.00574638	14	SERPINF1/PTN/PDGFRA/MDK/ADAMTS1/AXL/SLIT2/SLIT3/TIMP4/EGFR/PAM/EGR1/INHBA/HSPA5
GO:0048662	negative regulation of smooth muscle cell proliferation	14/1382	69/17913	0.000684194	0.0065666	14	IGFBP5/TPM1/APOD/OGN/NDRG2/PRKG1/IGFBP3/ANG/KLF4/COMT/ILK/CDKN1A/GSTP1/MEF2C
GO:0051651	maintenance of location in cell	14/1382	72/17913	0.0010645	0.00934506	14	APOE/CAV1/SCIN/ARHGAP21/GSN/ARL2/SUN1/PARK7/FLNB/SKP1/OS9/SRI/AKAP9/HSPA5
GO:0021675	nerve development	14/1382	74/17913	0.00140593	0.0116434	14	SERPINE2/VCAM1/HES1/NRP2/SULF1/NRP1/SIX1/MAFB/NAV2/SLC1A3/ILK/ADARB1/CTNNB1/RPL24
GO:1900182	positive regulation of protein localization to nucleus	14/1382	74/17913	0.00140593	0.0116434	14	NGFR/BAG3/PARK7/TRIM8/CCT3/RAN/CCT7/CCT4/TCP1/FLNA/CCT6A/CCT2/CCT8/CCT5
GO:0051145	smooth muscle cell differentiation	14/1382	75/17913	0.00160825	0.0128962	14	HES1/SGCB/SOX9/HEY2/NPNT/SIX1/SMARCD3/COMP/ENG/ITGA8/MEF2C/CTNNB1/ZEB1/VEGFA
GO:0021954	central nervous system neuron development	14/1382	76/17913	0.00183423	0.014416	14	CDH11/NTRK2/NRP2/SLIT2/NFIB/NRP1/DCLK1/PTK2/C12orf57/HSP90AB1/ADARB1/UBB/UQCRQ/HSP90AA1
GO:0071260	cellular response to mechanical stimulus	14/1382	77/17913	0.00208593	0.0158788	14	COL1A1/GJA1/AGT/TMEM150C/SOX9/EGFR/LTBR/BAG3/ENG/BNIP3/TNFRSF1A/BAD/ATP1A1/GADD45A
GO:0034308	primary alcohol metabolic process	14/1382	78/17913	0.00236553	0.0175738	14	CYP1B1/BMP5/RBP4/DKK3/AKR1C1/AKR1C2/ALDH1A3/DHRS3/IGF1/AKR1C3/PARK7/ADH5/ALDH2/AKR1A1
GO:0010833	telomere maintenance via telomere lengthening	14/1382	79/17913	0.00267531	0.0194262	14	HSP90AB1/CTNNB1/CCT3/PTGES3/CCT7/NHP2/HSP90AA1/CCT4/TCP1/CCT6A/HNRNPA1/CCT2/CCT8/CCT5
GO:0014743	regulation of muscle hypertrophy	14/1382	79/17913	0.00267531	0.0194262	14	IGFBP5/LMNA/ERRFI1/AGT/PDE5A/PTK2/IL6ST/LMCD1/CAMK2D/ROCK2/TNFRSF1A/IGF1/MEF2A/GLRX3
GO:0045682	regulation of epidermis development	14/1382	81/17913	0.0033951	0.0236127	14	SFRP4/FOXC1/HES1/ERRFI1/CTSK/CTSL/HEY2/FST/CD109/ZFP36L1/ROCK2/CTNNB1/KRT10/ZFP36
GO:1901800	positive regulation of proteasomal protein catabolic process	14/1382	93/17913	0.0116949	0.0601188	14	CLU/NUPR1/CAV1/DAB2/HSPA1A/PSMC3/RACK1/SMAD7/NOP53/STUB1/PSMC5/PSMC1/SUMO2/PSMC4
GO:0050810	regulation of steroid biosynthetic process	14/1382	95/17913	0.0139754	0.0689711	14	APOE/IGFBP7/BMP5/DKK3/SNAI2/EGR1/SNAI1/SOD1/AKR1C3/INSIG2/RAN/MBTPS1/ATP1A1/FDPS
GO:0006942	regulation of striated muscle contraction	14/1382	96/17913	0.0152371	0.0731196	14	CAV1/PLN/PDE5A/ANK2/C12orf57/CAMK2D/SMAD7/SRI/CALM2/ATP2A2/GSTO1/ATP1A1/FLNA/AKAP9
GO:0097327	response to antineoplastic agent	14/1382	96/17913	0.0152371	0.0731196	14	ADIRF/SERPINF1/ERRFI1/PTGR1/EGFR/EGR1/FBXO32/CTNNA1/NUCB1/CTNNB1/RPL18A/HNRNPA1/DDIT4/EIF4EBP1
GO:0002027	regulation of heart rate	14/1382	98/17913	0.0180206	0.0826242	14	TPM1/EPAS1/CAV1/AGT/PLN/HEY2/ANK2/CAMK2D/YWHAE/ATP5PF/SRI/CALM2/ATP2A2/AKAP9
GO:0002688	regulation of leukocyte chemotaxis	14/1382	105/17913	0.0308546	0.122644	14	CXCL12/RARRES2/GAS6/PTN/MDK/NBL1/SLIT2/CSF1/JAM3/THBS1/CCL2/MIF/CALR/C1QBP
GO:0055017	cardiac muscle tissue growth	14/1382	106/17913	0.0331247	0.129965	14	FOXC1/FGFR1/GJA1/FOXC2/SORBS2/RBP4/AGT/YAP1/TBX2/HEY2/SAV1/PDLIM5/IGF1/MEF2C
GO:0001938	positive regulation of endothelial cell proliferation	14/1382	107/17913	0.0355134	0.136196	14	CXCL12/FGFR1/MDK/NRP2/CAV2/NRP1/ANG/JUN/TNFSF12/BMPR2/AKT3/MYDGF/NR4A1/VEGFA
GO:0062014	negative regulation of small molecule metabolic process	14/1382	107/17913	0.0355134	0.136196	14	APOE/LEPR/NUPR1/BMP5/DKK3/SNAI2/SNAI1/SOD1/ACADVL/AKR1C3/FAM3C/DNAJC15/INSIG2/DDIT4
GO:0046620	regulation of organ growth	14/1382	111/17913	0.0463099	0.162876	14	FOXC1/FGFR1/GJA1/FOXC2/RBP4/YAP1/TBX2/HEY2/PTK2/SAV1/SOD1/YBX3/IGF1/MEF2C
GO:0060419	heart growth	14/1382	112/17913	0.0493325	0.168288	14	FOXC1/FGFR1/GJA1/FOXC2/SORBS2/RBP4/AGT/YAP1/TBX2/HEY2/SAV1/PDLIM5/IGF1/MEF2C
GO:0007173	epidermal growth factor receptor signaling pathway	14/1382	115/17913	0.0592132	0.191255	14	ERRFI1/EFEMP1/AGT/SOX9/EGFR/GPRC5A/ITGA1/APP/SPRY1/SHC1/MVB12A/CAMLG/ARF4/IFI6
GO:0010822	positive regulation of mitochondrion organization	14/1382	115/17913	0.0592132	0.191255	14	DCN/LEPROT/BNIP3/YWHAE/BAD/YWHAQ/PDCD5/PARK7/FAM162A/FIS1/CHCHD10/OPTN/STOML2/TOMM7
GO:0072089	stem cell proliferation	14/1382	116/17913	0.0627843	0.196338	14	FBLN1/FGFR1/ID4/PTN/LTBP3/SNAI2/YAP1/KITLG/SMARCD3/PLXNB2/ZFP36L1/CTNNA1/CTNNB1/VEGFA
GO:0034754	cellular hormone metabolic process	14/1382	117/17913	0.066497	0.205291	14	CYP1B1/PDGFRA/BMP5/RBP4/DKK3/AKR1C1/AKR1C2/ALDH1A3/RBP1/EGR1/COMT/DHRS3/SPP1/AKR1C3
GO:1903409	reactive oxygen species biosynthetic process	14/1382	122/17913	0.0872276	0.246592	14	CLU/CYP1B1/CAV1/AGT/SLC7A2/PTGIS/DDAH2/KLF4/SOD1/ROCK2/HSP90AB1/PARK7/HSP90AA1/KLF2
GO:0009855	determination of bilateral symmetry	14/1382	123/17913	0.0918134	0.255999	14	NBL1/GJA1/BICC1/TBX2/DAAM2/DYNC2H1/ENG/AHI1/PCSK5/DPCD/IFT57/MEF2C/CTNNB1/TMED2
GO:0009799	specification of symmetry	14/1382	124/17913	0.0965467	0.264031	14	NBL1/GJA1/BICC1/TBX2/DAAM2/DYNC2H1/ENG/AHI1/PCSK5/DPCD/IFT57/MEF2C/CTNNB1/TMED2
GO:0035296	regulation of tube diameter	14/1382	125/17913	0.101428	0.276215	14	APOE/ACTA2/CAV1/GJA1/AGT/EDNRA/PRKG1/EGFR/ITGA1/COMP/SOD1/ROCK2/BMPR2/GUCY1A1
GO:0097746	regulation of blood vessel diameter	14/1382	125/17913	0.101428	0.276215	14	APOE/ACTA2/CAV1/GJA1/AGT/EDNRA/PRKG1/EGFR/ITGA1/COMP/SOD1/ROCK2/BMPR2/GUCY1A1
GO:0051494	negative regulation of cytoskeleton organization	14/1382	128/17913	0.116955	0.30484	14	MAP1B/EPS8/PLEKHH2/SLIT2/DLC1/PFN2/LMOD1/SCIN/LIMA1/GSN/PHLDB2/RDX/NPM1/FKBP4
GO:0009185	ribonucleoside diphosphate metabolic process	14/1382	135/17913	0.158235	0.37354	14	NUPR1/AK1/ZBTB20/BAD/IGF1/LDHA/TPI1/EIF6/PKM/PFKP/PGAM1/NUDT5/DDIT4/ENO1
GO:0106106	cold-induced thermogenesis	14/1382	143/17913	0.213433	0.444546	14	LEPR/EPAS1/ID1/CAV1/GJA1/LAMA4/FOXC2/DIO2/ADAMTS5/PDGFC/THRA/GNAS/RHEB/VEGFA
GO:0120161	regulation of cold-induced thermogenesis	14/1382	143/17913	0.213433	0.444546	14	LEPR/EPAS1/ID1/CAV1/GJA1/LAMA4/FOXC2/DIO2/ADAMTS5/PDGFC/THRA/GNAS/RHEB/VEGFA
GO:0045834	positive regulation of lipid metabolic process	14/1382	144/17913	0.220872	0.45291	14	APOE/PDGFRB/PDGFRA/AGT/TWIST1/CCDC3/FGFR3/PTK2/CD81/ZBTB20/TNFRSF1A/CAPN2/RACK1/STOML2
GO:0061351	neural precursor cell proliferation	14/1382	144/17913	0.220872	0.45291	14	FGFR1/ID4/PTN/MDK/ZNF503/DIXDC1/SMARCD3/PLXNB2/CTNNA1/ILK/RYK/CTNNB1/VEGFA/FLNA
GO:1990845	adaptive thermogenesis	14/1382	152/17913	0.283967	0.524428	14	LEPR/EPAS1/ID1/CAV1/GJA1/LAMA4/FOXC2/DIO2/ADAMTS5/PDGFC/THRA/GNAS/RHEB/VEGFA
GO:0050729	positive regulation of inflammatory response	14/1382	153/17913	0.292241	0.534835	14	PLA2G2A/NUPR1/MDK/LPL/AGT/OSMR/EGFR/CD81/IL6ST/APP/TNFRSF1A/PARK7/RPS19/TGM2
GO:0002673	regulation of acute inflammatory response	14/1382	160/17913	0.351919	0.594395	14	CLU/CFH/SERPING1/C1R/C1S/A2M/OSMR/CD81/IL6ST/CD59/GSTP1/PARK7/PHB/C1QBP
GO:0051100	negative regulation of binding	14/1382	162/17913	0.369396	0.614775	14	CRTAC1/ID1/CAV1/MDFI/PLN/HEY2/DAB2/JUN/PARK7/LRPAP1/IFI16/SRI/STUB1/HSPA5
GO:0006611	protein export from nucleus	14/1382	163/17913	0.378182	0.625078	14	GAS6/PTPN14/TCF7L2/BAG3/PKD1/YWHAE/PARK7/IFI27/CALR/AHCYL1/RAN/SSB/EIF5A/SRSF7
GO:2001257	regulation of cation channel activity	14/1382	166/17913	0.404676	0.653255	14	CAV1/S100A1/GEM/PLN/ANK2/APP/AHNAK/CCL2/RRAD/CAMK2D/MEF2C/SRI/CALM2/GSTO1
GO:0046328	regulation of JNK cascade	14/1382	169/17913	0.431277	0.6797	14	SFRP1/FZD8/SASH1/EGFR/LTBR/APP/GADD45B/HACD3/MAP3K20/GSTP1/MDFIC/RPS3/DNAJA1/GADD45A
GO:0016051	carbohydrate biosynthetic process	14/1382	194/17913	0.642312	0.827802	14	LEPR/PTH1R/ENPP1/RBP4/ISYNA1/EXT2/ATF3/IGF1/FAM3C/TPI1/MDH1/MDH2/PGAM1/ENO1
GO:0007281	germ cell development	14/1382	238/17913	0.886253	0.953872	14	PTN/MDK/PDE5A/JAM3/ANG/SMAD5/NECTIN2/IGF1/CTNNB1/ANGPT2/RAN/SLIRP/ERCC1/HEXB
GO:0071824	protein-DNA complex subunit organization	14/1382	240/17913	0.892985	0.956004	14	SOX9/HEY2/SMARCD3/THRA/TCF4/MYC/SHPRH/NPM1/GTF2H5/PTMA/RPS27A/UBB/CENPX/SET
GO:0090305	nucleic acid phosphodiester bond hydrolysis	14/1382	268/17913	0.95758	0.985421	14	ENPP1/ENPP2/RNASE4/ANG/REXO2/ENDOD1/GTF2H5/POLD2/POLR2I/RPS27A/UBB/DDX1/ERCC1/ZFP36
GO:0007059	chromosome segregation	14/1382	275/17913	0.966989	0.9907	14	GEM/P3H4/BOD1/SUN1/CHMP5/CTNNB1/RAN/PSMG2/PHB2/RPS3/CENPX/CDC26/NTMT1/SLC25A5
GO:0016570	histone modification	14/1382	420/17913	0.99995	1	14	LMNA/TWIST1/SNAI2/COPRS/EID1/CAMK2D/SETD7/CTNNB1/PRMT1/SKP1/PHB/VEGFA/SET/NTMT1
GO:0030574	collagen catabolic process	13/1382	37/17913	1.99537e-06	5.40891e-05	13	MMP2/MRC2/CTSK/CTSL/MMP14/ADAMTS2/FAP/COL13A1/CST3/COL15A1/ITGB1/CTSB/PEPD
GO:0072132	mesenchyme morphogenesis	13/1382	51/17913	9.63582e-05	0.00132771	13	ACTA2/FOXC1/FGFR1/FOXC2/BMP5/TWIST1/SNAI2/SOX9/TBX2/HEY2/ENG/SNAI1/MYC
GO:0030166	proteoglycan biosynthetic process	13/1382	53/17913	0.000147273	0.00194097	13	DCN/BGN/ACAN/CSPG4/DSEL/CHST3/UGDH/TCF7L2/VCAN/EXT2/BMPR2/IGF1/CTNNB1
GO:0031102	neuron projection regeneration	13/1382	55/17913	0.000219783	0.00268426	13	TNC/APOD/LRP1/MAP1B/PTN/THY1/PRRX1/LAMB2/JAM3/KLF4/JUN/SPP1/CTNNA1
GO:0046686	response to cadmium ion	13/1382	57/17913	0.000320889	0.00360238	13	SPARC/MT1E/MT1A/EGFR/MT1X/SOD1/GSN/JUN/AKR1C3/MT1F/CYB5A/ERCC1/FOS
GO:0046782	regulation of viral transcription	13/1382	64/17913	0.00103947	0.00921268	13	IFITM3/JUN/NUCKS1/POLR2F/TRIM8/PSMC3/POLR2H/POLR2E/MDFIC/POLR2I/POLR2L/POLR2K/ZFP36
GO:0014031	mesenchymal cell development	13/1382	65/17913	0.00120917	0.0104826	13	FN1/FOXC1/HES1/NRP2/FOXC2/TWIST1/NRP1/SNAI2/SOX9/KITLG/EDNRA/HEY2/JAG1
GO:1990542	mitochondrial transmembrane transport	13/1382	66/17913	0.00140133	0.0116434	13	ATP5MC3/MRPL18/ATP5PF/STOML2/ATP5MC1/NDUFA13/ATP5F1C/ATP5PO/ATP5F1D/ATP5F1B/ATP5MF/ATP5ME/TOMM7
GO:0060193	positive regulation of lipase activity	13/1382	70/17913	0.00244111	0.0179672	13	FGFR1/PDGFRB/PDGFRA/RHOC/NTRK2/AGT/EDNRA/FGFR3/EGFR/ANG/ARL1/ABL2/ARF4
GO:0006283	transcription-coupled nucleotide-excision repair	13/1382	73/17913	0.00357919	0.0245247	13	COPS8/POLR2F/COPS6/GTF2H5/POLR2H/POLR2E/POLD2/POLR2I/RPS27A/UBB/ERCC1/POLR2L/POLR2K
GO:1903779	regulation of cardiac conduction	13/1382	73/17913	0.00357919	0.0245247	13	CAV1/FXYD1/AGT/ANK2/ASPH/FXYD6/CAMK2D/AHCYL1/SRI/CALM2/ATP2A2/ATP1A1/FLNA
GO:0006919	activation of cysteine-type endopeptidase activity involved in apoptotic process	13/1382	75/17913	0.00455272	0.0292479	13	BEX3/DLC1/NGFR/BAD/IFT57/MTCH1/FAM162A/DAP/RPS27L/RACK1/HSPE1/HSPD1/CYCS
GO:0006890	retrograde vesicle-mediated transport, Golgi to ER	13/1382	76/17913	0.00511367	0.032073	13	COPZ2/KDELR3/KDELR2/KDELR1/KIFAP3/KIF1C/RER1/TMED9/TMED10/SCYL1/ARF4/TMED2/SURF4
GO:0010611	regulation of cardiac muscle hypertrophy	13/1382	76/17913	0.00511367	0.032073	13	LMNA/ERRFI1/AGT/PDE5A/PTK2/IL6ST/LMCD1/CAMK2D/ROCK2/TNFRSF1A/IGF1/MEF2A/GLRX3
GO:0030516	regulation of axon extension	13/1382	76/17913	0.00511367	0.032073	13	FN1/APOE/CXCL12/LRP1/MAP1B/CTTN/NRP1/TNFRSF12A/BMPR2/ILK/RYK/DPYSL2/VEGFA
GO:0055013	cardiac muscle cell development	13/1382	78/17913	0.00640132	0.0382908	13	LMNA/PDGFRB/PDGFRA/SGCB/SORBS2/AGT/HEY2/PDLIM5/MYH11/MYH10/IGF1/MEF2A/VEGFA
GO:1903363	negative regulation of cellular protein catabolic process	13/1382	80/17913	0.00793416	0.044944	13	MAP1A/ANXA2/LAPTM4B/HSP90AB1/RPL5/PARK7/ATRAID/ERLEC1/CAMLG/RPL11/OS9/NOP53/UBXN1
GO:0014068	positive regulation of phosphatidylinositol 3-kinase signaling	13/1382	81/17913	0.00880192	0.0485722	13	DCN/FGFR1/PDGFRB/PDGFRA/NTRK2/AGT/ANGPT1/UNC5B/SOX9/PDGFA/PTK2/IGF1/MYDGF
GO:0051702	interaction with symbiont	13/1382	81/17913	0.00880192	0.0485722	13	FN1/APOE/CAV2/ANXA2/JUN/NUCKS1/PPIB/IFI27/PSMC3/CALM2/SUGT1/HSPD1/HSPA8
GO:0055117	regulation of cardiac muscle contraction	13/1382	81/17913	0.00880192	0.0485722	13	CAV1/PLN/PDE5A/ANK2/CAMK2D/SMAD7/SRI/CALM2/ATP2A2/GSTO1/ATP1A1/FLNA/AKAP9
GO:0045445	myoblast differentiation	13/1382	82/17913	0.00974239	0.0527151	13	LGALS1/ID3/EPAS1/SOX9/TBX2/BOC/JAG1/IGFBP3/TCF7L2/ZFP36L1/ILK/IGF1/MEF2C
GO:0046916	cellular transition metal ion homeostasis	13/1382	83/17913	0.0107595	0.056353	13	MT2A/CP/TF/CYBRD1/SLC39A14/SCARA5/APP/SOD1/MYC/NDFIP1/SKP1/SRI/NEDD8
GO:1905897	regulation of response to endoplasmic reticulum stress	13/1382	83/17913	0.0107595	0.056353	13	CLU/NUPR1/CAV1/NFE2L1/PARK7/HSPA1A/ERLEC1/RACK1/OS9/MANF/HSPA5/PPP1R15A/UBXN1
GO:0006626	protein targeting to mitochondrion	13/1382	84/17913	0.0118572	0.0605701	13	BAG3/LEPROT/PDCD5/LMAN1/FIS1/DNAJC19/SLC25A6/NDUFA13/HSP90AA1/TIMM8B/TOMM20/TIMM13/TOMM7
GO:0033138	positive regulation of peptidyl-serine phosphorylation	13/1382	86/17913	0.0143105	0.0696404	13	GAS6/CAV1/NTRK2/ANGPT1/PFN2/EGFR/APP/HSP90AB1/MIF/PARK7/HSP90AA1/VEGFA/AKAP9
GO:0034103	regulation of tissue remodeling	13/1382	86/17913	0.0143105	0.0696404	13	LEPR/BGLAP/MDK/GJA1/SFRP1/AGT/PDK4/TMEM119/TNFRSF11B/EGFR/GPNMB/CST3/ROCK2
GO:1903321	negative regulation of protein modification by small protein conjugation or removal	13/1382	86/17913	0.0143105	0.0696404	13	CAV1/SOX4/HSPA1B/RPL5/PARK7/HSPA1A/CTNNB1/CAMLG/SMAD7/RPL11/RPS3/DNAJA1/UBXN1
GO:0045639	positive regulation of myeloid cell differentiation	13/1382	90/17913	0.0203614	0.0909552	13	CSF1/KITLG/SCIN/JAG1/HSPA1B/JUN/ZFP36L1/HSPA1A/PRMT1/GNAS/KLF10/INHBA/FOS
GO:0006900	vesicle budding from membrane	13/1382	91/17913	0.0221358	0.0964018	13	ANXA2/S100A10/WASL/CD59/MCFD2/LMAN1/TFG/SEC31A/TMED9/TMED10/USO1/TMED2/AP2M1
GO:0045833	negative regulation of lipid metabolic process	13/1382	91/17913	0.0221358	0.0964018	13	APOE/APOD/BMP5/DKK3/SNAI2/PDGFA/SNAI1/SOD1/ACADVL/AKR1C3/SPHK1/INSIG2/ATP1A1
GO:0051591	response to cAMP	13/1382	93/17913	0.026026	0.107769	13	COL1A1/SPARC/IGFBP5/CDO1/APP/ZFP36L1/NDUFS4/FOSB/NME1/AKAP9/HSPA5/FOS/AHR
GO:0110020	regulation of actomyosin structure organization	13/1382	94/17913	0.0281494	0.115529	13	TPM1/RHOC/SFRP1/LIMCH1/DLC1/NRP1/PFN2/SORBS3/SDC4/S100A10/PHLDB2/ROCK2/MEF2C
GO:0030038	contractile actin filament bundle assembly	13/1382	97/17913	0.0352759	0.135472	13	TPM1/RHOC/ITGB5/SFRP1/LIMCH1/DLC1/NRP1/PFN2/SORBS3/SDC4/S100A10/PHLDB2/ROCK2
GO:0043149	stress fiber assembly	13/1382	97/17913	0.0352759	0.135472	13	TPM1/RHOC/ITGB5/SFRP1/LIMCH1/DLC1/NRP1/PFN2/SORBS3/SDC4/S100A10/PHLDB2/ROCK2
GO:0033559	unsaturated fatty acid metabolic process	13/1382	98/17913	0.0379149	0.139995	13	CYP1B1/PTGDS/AKR1C2/PTGR1/PTGIS/FADS3/TNFRSF1A/MGLL/AKR1C3/CBR1/GSTP1/MIF/PTGES3
GO:0042136	neurotransmitter biosynthetic process	13/1382	98/17913	0.0379149	0.139995	13	CLU/CYP1B1/CAV1/AGT/SLC7A2/PTGIS/DDAH2/KLF4/SLC1A3/ROCK2/HSP90AB1/HSP90AA1/KLF2
GO:0043244	regulation of protein complex disassembly	13/1382	98/17913	0.0379149	0.139995	13	DSTN/MAP1B/EPS8/PLEKHH2/LMOD1/SCIN/LIMA1/ASPH/BNIP3/GSN/CFL2/RDX/EIF5A
GO:1902106	negative regulation of leukocyte differentiation	13/1382	99/17913	0.0406911	0.147695	13	FBN1/MDK/SFRP1/MAFB/TMEM176B/TMEM176A/MYC/TOB2/PRDX2/CTNNB1/SMAD7/NME1/INHBA
GO:0001841	neural tube formation	13/1382	100/17913	0.0436074	0.156846	13	SFRP1/BMP5/TWIST1/DLC1/SDC4/SOX4/TULP3/PLXNB2/CTHRC1/LMO4/IFT57/RALA/TMED2
GO:0046822	regulation of nucleocytoplasmic transport	13/1382	100/17913	0.0436074	0.156846	13	APOD/GAS6/ANGPT1/PTPN14/TCF7L2/BAG3/PKIG/YWHAE/PARK7/IFI27/RAN/MDFIC/FLNA
GO:0002504	antigen processing and presentation of peptide or polysaccharide antigen via MHC class II	13/1382	101/17913	0.0466667	0.16293	13	CTSL/CTSF/THBS1/DYNLL1/DYNC1I2/KIFAP3/SEC31A/DYNC1LI2/CLTA/DCTN2/AP1S1/AP2M1/DCTN6
GO:0006289	nucleotide-excision repair	13/1382	102/17913	0.0498717	0.169503	13	COPS8/POLR2F/COPS6/GTF2H5/POLR2H/POLR2E/POLD2/POLR2I/RPS27A/UBB/ERCC1/POLR2L/POLR2K
GO:0021510	spinal cord development	13/1382	102/17913	0.0498717	0.169503	13	PTN/DAAM2/INTU/DYNC2H1/VIT/SOX4/TULP3/BAG3/PKD1/NFE2L1/LMO4/ADARB1/PHGDH
GO:0098781	ncRNA transcription	13/1382	104/17913	0.0567284	0.185435	13	CAVIN1/ANG/POLR2F/SNAPC1/POLR2H/POLR2E/PHAX/POLR2I/NOP53/NCL/POLR2L/GTF3C6/POLR2K
GO:0021761	limbic system development	13/1382	106/17913	0.064195	0.199557	13	FGFR1/ID4/MDK/NRP2/NRP1/ALDH1A3/TMEM108/FEZ1/YWHAE/RAN/UBB/NME1/UQCRQ
GO:0042303	molting cycle	13/1382	109/17913	0.0765686	0.225367	13	IGFBP5/FGF7/SOX9/PDGFA/INTU/EGFR/FST/SAV1/SNAI1/CD109/CTNNB1/SNRPE/INHBA
GO:0042633	hair cycle	13/1382	109/17913	0.0765686	0.225367	13	IGFBP5/FGF7/SOX9/PDGFA/INTU/EGFR/FST/SAV1/SNAI1/CD109/CTNNB1/SNRPE/INHBA
GO:0051149	positive regulation of muscle cell differentiation	13/1382	111/17913	0.0856146	0.244985	13	MMP14/EHD2/BOC/SHOX2/SMARCD3/ENG/CTNNA1/IGF1/MORF4L2/MEF2C/CTNNB1/CAPN2/MEF2A
GO:0010906	regulation of glucose metabolic process	13/1382	113/17913	0.0953046	0.264012	13	IGFBP5/IGFBP4/LEPR/ENPP1/C1QTNF1/PDK4/IGFBP3/PHLDA2/NFE2L1/BAD/IGF1/FAM3C/COX11
GO:1904375	regulation of protein localization to cell periphery	13/1382	113/17913	0.0953046	0.264012	13	LRP1/EPB41L2/MMP14/EPHA3/EGFR/DAB2/ITGB1/LGALS3/TMEM59/RER1/RACK1/SQSTM1/AP2M1
GO:0043484	regulation of RNA splicing	13/1382	115/17913	0.10564	0.281554	13	RBFOX2/AHNAK/HSPA1A/PRDX6/NSRP1/SAP18/SNRNP70/C1QBP/HSPA8/HNRNPA1/RPS13/FUS/SRSF7
GO:0010633	negative regulation of epithelial cell migration	13/1382	116/17913	0.111049	0.291084	13	DCN/APOE/SERPINF1/NR2F2/SLIT2/PFN2/PTPRG/SPRED1/ADAMTS9/THBS1/KLF4/MEF2C/ANGPT2
GO:0003014	renal system process	13/1382	120/17913	0.134274	0.335017	13	EMP2/GAS6/GJA1/SULF1/AGT/KCNMA1/MAGED2/MCAM/ADCY3/COMT/PCSK5/GSN/AKR1C3
GO:0046031	ADP metabolic process	13/1382	121/17913	0.140472	0.342975	13	NUPR1/AK1/ZBTB20/BAD/IGF1/LDHA/TPI1/EIF6/PKM/PFKP/PGAM1/DDIT4/ENO1
GO:0032368	regulation of lipid transport	13/1382	122/17913	0.146822	0.356283	13	APOE/LRP1/C1QTNF1/AGT/PLA2R1/ANXA2/PLTP/ITGAV/THBS1/SPP1/MIF/ATP5PF/PRELID1
GO:0035270	endocrine system development	13/1382	122/17913	0.146822	0.356283	13	PDGFRA/CDKN1C/MDK/HES1/BMP5/DKK3/SOX9/SIX1/SOX4/PBX1/ARID5B/BAD/RHEB
GO:0046887	positive regulation of hormone secretion	13/1382	125/17913	0.166768	0.390037	13	LRP1/FGFR1/GJA1/C1QTNF1/RBP4/EGFR/SOX4/TCF7L2/SPP1/PHPT1/BAD/SRI/INHBA
GO:0051668	localization within membrane	13/1382	126/17913	0.173706	0.396472	13	APOE/PTN/THY1/MAPK10/NRXN2/CD81/GSN/SEC31A/CLSTN1/RER1/RALA/FLNA/RFTN1
GO:0014013	regulation of gliogenesis	13/1382	128/17913	0.188	0.413585	13	SERPINE2/LRP1/ID4/PTN/MDK/HES1/TMEM98/CSF1/DAAM2/IL6ST/APP/CTNNB1/RHEB
GO:0051291	protein heterooligomerization	13/1382	128/17913	0.188	0.413585	13	COL1A1/COL1A2/COL6A2/COL6A1/C1QTNF1/ANXA2/PKD1/S100A10/CTNNA1/ILK/TRPS1/KRT10/SQSTM1
GO:0006766	vitamin metabolic process	13/1382	130/17913	0.202828	0.433071	13	FGFR1/ENPP1/SNAI2/RBP1/PLTP/VKORC1/CYB5R3/SNAI1/AKR1C3/CBR1/PDZD11/CYB5A/GSTO1
GO:0007292	female gamete generation	13/1382	132/17913	0.218161	0.448344	13	PTN/MDK/ADAMTS1/PDE5A/ANG/IGF1/TOB2/CTNNB1/UBB/ERCC1/INHBA/HEXB/TNFAIP6
GO:0009135	purine nucleoside diphosphate metabolic process	13/1382	133/17913	0.226007	0.460889	13	NUPR1/AK1/ZBTB20/BAD/IGF1/LDHA/TPI1/EIF6/PKM/PFKP/PGAM1/DDIT4/ENO1
GO:0009179	purine ribonucleoside diphosphate metabolic process	13/1382	133/17913	0.226007	0.460889	13	NUPR1/AK1/ZBTB20/BAD/IGF1/LDHA/TPI1/EIF6/PKM/PFKP/PGAM1/DDIT4/ENO1
GO:0070665	positive regulation of leukocyte proliferation	13/1382	134/17913	0.233967	0.466799	13	VCAM1/HES1/CSF1/KITLG/CD276/CD81/IL6ST/IGF1/CDKN1A/MIF/MEF2C/IGFBP2/RPS3
GO:0071901	negative regulation of protein serine/threonine kinase activity	13/1382	136/17913	0.250212	0.485824	13	APOE/CAV1/CDKN1C/NR2F2/RGS3/SFRP1/SPRED1/HSPB1/DUSP14/CDKN1A/GSTP1/HEXIM1/DNAJA1
GO:0009411	response to UV	13/1382	137/17913	0.258488	0.498826	13	PTN/CCND1/SCARA3/EGFR/SDF4/MYC/CRIP1/CDKN1A/NPM1/CIRBP/RPL26/ERCC1/COPS9
GO:0007259	JAK-STAT cascade	13/1382	140/17913	0.283871	0.524426	13	CYP1B1/CAV1/HES1/AGT/GHR/FGFR3/IL6ST/SOCS3/LEPROT/PKD1/CCL2/TNFRSF1A/IGF1
GO:1904064	positive regulation of cation transmembrane transport	13/1382	140/17913	0.283871	0.524426	13	THY1/FXYD1/S100A1/AGT/ANK2/CCL2/PARK7/CHCHD10/SRI/CALM2/GSTO1/FLNA/AKAP9
GO:0019359	nicotinamide nucleotide biosynthetic process	13/1382	142/17913	0.301208	0.542075	13	NNMT/NUPR1/PTGIS/ZBTB20/IGF1/LDHA/TPI1/EIF6/PKM/PFKP/PGAM1/DDIT4/ENO1
GO:0019363	pyridine nucleotide biosynthetic process	13/1382	142/17913	0.301208	0.542075	13	NNMT/NUPR1/PTGIS/ZBTB20/IGF1/LDHA/TPI1/EIF6/PKM/PFKP/PGAM1/DDIT4/ENO1
GO:1903670	regulation of sprouting angiogenesis	13/1382	143/17913	0.309986	0.552998	13	S100A1/FOXC2/NRP1/NGFR/SPRED1/ADAMTS9/THBS1/KLF4/EPN2/AKT3/PKM/VEGFA/KLF2
GO:1903169	regulation of calcium ion transmembrane transport	13/1382	144/17913	0.318829	0.563562	13	THY1/S100A1/GEM/PLN/ANK2/AHNAK/RRAD/CAMK2D/YWHAE/SESTD1/SRI/CALM2/GSTO1
GO:0072525	pyridine-containing compound biosynthetic process	13/1382	145/17913	0.327733	0.567709	13	NNMT/NUPR1/PTGIS/ZBTB20/IGF1/LDHA/TPI1/EIF6/PKM/PFKP/PGAM1/DDIT4/ENO1
GO:0007051	spindle organization	13/1382	147/17913	0.345702	0.591137	13	CEP126/HSPA1B/LZTS2/PKD1/MAP4/SBDS/HSPA1A/CHMP5/TUBB/RAN/FLNA/RPS3/NTMT1
GO:0051092	positive regulation of NF-kappaB transcription factor activity	13/1382	149/17913	0.363851	0.608828	13	CLU/CAV1/AGT/HSPA1B/APP/NPM1/HSPA1A/TRIM8/SPHK1/PRDX3/RPS27A/UBB/RPS3
GO:0022406	membrane docking	13/1382	150/17913	0.372979	0.618515	13	VCAM1/CAV2/STXBP1/AHI1/DYNLL1/YWHAE/DYNC1I2/TUBB/DCTN2/TUBA1A/HSP90AA1/TUBB4B/AKAP9
GO:0097696	STAT cascade	13/1382	150/17913	0.372979	0.618515	13	CYP1B1/CAV1/HES1/AGT/GHR/FGFR3/IL6ST/SOCS3/LEPROT/PKD1/CCL2/TNFRSF1A/IGF1
GO:0072376	protein activation cascade	13/1382	151/17913	0.382137	0.625673	13	CLU/CFH/FBLN1/SERPING1/C1R/C1S/TFPI/A2M/CFD/CD81/CD59/PHB/C1QBP
GO:0034767	positive regulation of ion transmembrane transport	13/1382	152/17913	0.391318	0.635277	13	THY1/FXYD1/S100A1/AGT/ANK2/CCL2/PARK7/CHCHD10/SRI/CALM2/GSTO1/FLNA/AKAP9
GO:0045619	regulation of lymphocyte differentiation	13/1382	164/17913	0.501512	0.750983	13	GAS6/MDK/SFRP1/AXL/MMP14/SOD1/ZFP36L1/BAD/PRDX2/ZEB1/SMAD7/INHBA/PRELID1
GO:0019935	cyclic-nucleotide-mediated signaling	13/1382	166/17913	0.519546	0.766831	13	APOE/PTH1R/PLN/SOX9/RAMP1/PRKG1/THBS1/ADCY3/NDUFS4/GNAS/NUDT4/CALM2/AHR
GO:0048167	regulation of synaptic plasticity	13/1382	169/17913	0.546236	0.780615	13	APOE/SERPINE2/MAP1B/PTN/NTRK2/AGT/SYNPO/MAP1A/S100B/APP/STXBP1/MEF2C/SQSTM1
GO:0051783	regulation of nuclear division	13/1382	172/17913	0.5724	0.800812	13	PDGFRB/CDKN1C/CAV2/HSPA1B/NFE2L1/IGF1/HSPA1A/CHMP5/CALR/SPHK1/PSMG2/PHB2/CDC26
GO:0015893	drug transport	13/1382	175/17913	0.597945	0.81341	13	CXCL12/GJA1/CYGB/AGT/SLC7A2/SNCG/SLC1A3/MYC/PARK7/ARL6IP5/SLC25A6/INHBA/SLC25A5
GO:0050657	nucleic acid transport	13/1382	176/17913	0.606307	0.814331	13	MYO1C/ZFP36L1/PURA/MRPL18/RAN/SSB/PHAX/EIF5A/RTRAF/RFTN1/HNRNPA1/SRSF7/ZFP36
GO:0050658	RNA transport	13/1382	176/17913	0.606307	0.814331	13	MYO1C/ZFP36L1/PURA/MRPL18/RAN/SSB/PHAX/EIF5A/RTRAF/RFTN1/HNRNPA1/SRSF7/ZFP36
GO:0071222	cellular response to lipopolysaccharide	13/1382	176/17913	0.606307	0.814331	13	TFPI/AXL/SASH1/PLSCR4/VIM/CCL2/GSTP1/MIF/PRDX2/MEF2C/CHMP5/CAPN2/ZFP36
GO:0051236	establishment of RNA localization	13/1382	179/17913	0.630901	0.823759	13	MYO1C/ZFP36L1/PURA/MRPL18/RAN/SSB/PHAX/EIF5A/RTRAF/RFTN1/HNRNPA1/SRSF7/ZFP36
GO:0009952	anterior/posterior pattern specification	13/1382	182/17913	0.6547	0.833325	13	FOXC1/HES1/NR2F2/SFRP1/FOXC2/HOXA10/HEY2/PBX1/TULP3/PCSK5/BMPR2/CTNNB1/TMED2
GO:0071219	cellular response to molecule of bacterial origin	13/1382	183/17913	0.662447	0.840106	13	TFPI/AXL/SASH1/PLSCR4/VIM/CCL2/GSTP1/MIF/PRDX2/MEF2C/CHMP5/CAPN2/ZFP36
GO:0006643	membrane lipid metabolic process	13/1382	191/17913	0.720817	0.86618	13	CYP1B1/PLPP3/A4GALT/PLPP1/KDSR/TNFRSF1A/SPHK1/RACK1/DPM3/PIGP/SUMF2/HEXB/PYURF
GO:0098656	anion transmembrane transport	13/1382	224/17913	0.889723	0.956004	13	FXYD1/AGT/PDPN/SLC7A2/PCYOX1/CLIC4/THBS1/SLC1A3/ANKH/VDAC2/VDAC1/ARL6IP5/VDAC3
GO:0051048	negative regulation of secretion	13/1382	226/17913	0.896482	0.95766	13	FN1/APOE/GAS6/SFRP1/ANGPT1/PLA2R1/COMT/TNFRSF1A/PNKD/ATP5PF/NDUFAF2/INHBA/JAGN1
GO:0050663	cytokine secretion	13/1382	230/17913	0.908984	0.964763	13	FN1/S100A13/LRP1/GAS6/MDK/LPL/AGT/TWIST1/ANGPT1/AKAP12/CADM1/ITGAV/MIF
GO:0001958	endochondral ossification	12/1382	27/17913	2.4729e-07	8.85821e-06	12	COL1A1/FOXC1/DLX5/MMP14/TMEM119/FGFR3/COL13A1/RUNX2/ALPL/MEF2C/COL2A1/GNAS
GO:0036075	replacement ossification	12/1382	27/17913	2.4729e-07	8.85821e-06	12	COL1A1/FOXC1/DLX5/MMP14/TMEM119/FGFR3/COL13A1/RUNX2/ALPL/MEF2C/COL2A1/GNAS
GO:0003176	aortic valve development	12/1382	32/17913	2.23309e-06	5.90919e-05	12	EMILIN1/SLIT2/SLIT3/TWIST1/SNAI2/SOX9/HEY2/JAG1/SNAI1/ROCK2/BMPR2/TNFRSF1A
GO:0035909	aorta morphogenesis	12/1382	34/17913	4.69056e-06	0.00010997	12	COL3A1/LRP1/PDGFRB/HES1/TBX2/HEY2/SIX1/JAG1/MYLK/SOX4/ADAMTS9/ENG
GO:0007007	inner mitochondrial membrane organization	12/1382	37/17913	1.27495e-05	0.000249468	12	ATP5MC3/ATP5PF/CHCHD10/ATP5MC1/NDUFA13/ATP5F1C/UQCC3/ATP5PO/ATP5F1D/ATP5F1B/ATP5MF/ATP5ME
GO:1905314	semi-lunar valve development	12/1382	37/17913	1.27495e-05	0.000249468	12	EMILIN1/SLIT2/SLIT3/TWIST1/SNAI2/SOX9/HEY2/JAG1/SNAI1/ROCK2/BMPR2/TNFRSF1A
GO:0007431	salivary gland development	12/1382	38/17913	1.73325e-05	0.00031999	12	FGFR1/FGF7/NFIB/NRP1/SNAI2/PDGFA/EGFR/NTN4/CST3/TWSG1/PLXND1/TGM2
GO:0038084	vascular endothelial growth factor signaling pathway	12/1382	40/17913	3.09482e-05	0.00049849	12	DCN/FOXC1/PDGFRB/PDGFRA/NRP2/SMOC2/NRP1/ADGRA2/HSPB1/CD63/MYO1C/VEGFA
GO:0071364	cellular response to epidermal growth factor stimulus	12/1382	43/17913	6.8414e-05	0.000990043	12	COL1A1/FOXC1/ID1/ERRFI1/SNAI2/SOX9/EGFR/ZFP36L1/GSTP1/EEF1A1/NCL/ZFP36
GO:0048701	embryonic cranial skeleton morphogenesis	12/1382	44/17913	8.75212e-05	0.00122508	12	PDGFRA/PRRX1/FOXC2/MMP14/TWIST1/TBX15/SIX1/RUNX2/TULP3/SLC39A1/MEF2C/GNAS
GO:0070849	response to epidermal growth factor	12/1382	47/17913	0.000174675	0.00224173	12	COL1A1/FOXC1/ID1/ERRFI1/SNAI2/SOX9/EGFR/ZFP36L1/GSTP1/EEF1A1/NCL/ZFP36
GO:0010171	body morphogenesis	12/1382	48/17913	0.000216725	0.00266448	12	COL1A1/MMP2/PDGFRA/DLX5/RRAS/CRISPLD1/PHLDB1/ASPH/CRISPLD2/ARID5B/PHLDB2/GNAS
GO:1900047	negative regulation of hemostasis	12/1382	50/17913	0.000327062	0.00366429	12	APOE/SERPINE2/SERPING1/PDGFRA/TFPI/C1QTNF1/PDGFA/PRKG1/FAP/CD9/COMP/THBS1
GO:0032964	collagen biosynthetic process	12/1382	53/17913	0.000579469	0.00568924	12	COL1A1/PDGFRB/EMILIN1/SERPINH1/ERRFI1/COL5A1/RCN3/CYGB/LARP6/P3H4/VIM/ENG
GO:0050819	negative regulation of coagulation	12/1382	53/17913	0.000579469	0.00568924	12	APOE/SERPINE2/SERPING1/PDGFRA/TFPI/C1QTNF1/PDGFA/PROCR/PRKG1/FAP/CD9/THBS1
GO:0001885	endothelial cell development	12/1382	55/17913	0.000825677	0.00764714	12	ID1/TJP1/GSTM3/S1PR3/CLIC4/COL18A1/ENG/AFDN/ROCK2/TNFRSF1A/RDX/CTNNB1
GO:0001836	release of cytochrome c from mitochondria	12/1382	57/17913	0.00115354	0.0100474	12	CLU/LMNA/BNIP3/JUN/BAD/IGF1/PDCD5/FAM162A/FIS1/CHCHD10/IFI6/PRELID1
GO:0010518	positive regulation of phospholipase activity	12/1382	57/17913	0.00115354	0.0100474	12	FGFR1/PDGFRB/PDGFRA/NTRK2/AGT/EDNRA/FGFR3/EGFR/ANG/ARL1/ABL2/ARF4
GO:0051055	negative regulation of lipid biosynthetic process	12/1382	57/17913	0.00115354	0.0100474	12	APOE/BMP5/DKK3/SNAI2/PDGFA/SNAI1/SOD1/ACADVL/AKR1C3/SPHK1/INSIG2/ATP1A1
GO:0030521	androgen receptor signaling pathway	12/1382	58/17913	0.00135409	0.0113525	12	PMEPA1/SFRP1/TGFB1I1/DAB2/PLPP1/FHL2/PARK7/CTNNB1/RWDD1/PHB/RAN/FKBP4
GO:0032233	positive regulation of actin filament bundle assembly	12/1382	58/17913	0.00135409	0.0113525	12	TPM1/ID1/RHOC/SFRP1/LIMCH1/NRP1/PFN2/SORBS3/SDC4/S100A10/ROCK2/FLNA
GO:0071384	cellular response to corticosteroid stimulus	12/1382	58/17913	0.00135409	0.0113525	12	SERPINF1/ERRFI1/EGFR/KLF9/FBXO32/ZFP36L1/AKR1C3/GSTP1/RAN/ZFP36/DDIT4/EIF4EBP1
GO:0001658	branching involved in ureteric bud morphogenesis	12/1382	60/17913	0.00184189	0.014416	12	PGF/AGT/SOX9/FOXD1/NPNT/SIX1/PBX1/MAGED1/ILK/MYC/CTNNB1/VEGFA
GO:0014032	neural crest cell development	12/1382	61/17913	0.00213504	0.0161641	12	FN1/FOXC1/HES1/NRP2/FOXC2/TWIST1/NRP1/SNAI2/SOX9/KITLG/EDNRA/JAG1
GO:2001244	positive regulation of intrinsic apoptotic signaling pathway	12/1382	62/17913	0.00246524	0.0181208	12	NUPR1/CAV1/SOD1/BAD/PARK7/FIS1/RACK1/RPL11/PRKRA/UBB/RPL26/RPS3
GO:0043297	apical junction assembly	12/1382	63/17913	0.00283585	0.020413	12	RHOC/GJA1/TJP1/SNAI2/PARD3/MYO1C/SNAI1/AFDN/RAB13/ROCK2/CTNNA1/ARL2
GO:0045600	positive regulation of fat cell differentiation	12/1382	63/17913	0.00283585	0.020413	12	ADIRF/FRZB/RARRES2/WIF1/LPL/SFRP1/MEDAG/SNAI2/CCDC3/SAV1/ZFP36L1/ZFP36
GO:0060135	maternal process involved in female pregnancy	12/1382	64/17913	0.0032504	0.0227487	12	PTN/NR2F2/GJA1/PTGIS/PAM/BMPR2/SPP1/ANGPT2/CTSB/PRDX3/JUNB/TMED2
GO:0032387	negative regulation of intracellular transport	12/1382	65/17913	0.00371256	0.0250373	12	CRYAB/APOD/MAP1B/PLN/ANGPT1/BAG3/PKIG/PARK7/LMAN1/ERLEC1/OS9/MDFIC
GO:0048864	stem cell development	12/1382	65/17913	0.00371256	0.0250373	12	FN1/FOXC1/HES1/NRP2/FOXC2/TWIST1/NRP1/SNAI2/SOX9/KITLG/EDNRA/JAG1
GO:0061035	regulation of cartilage development	12/1382	66/17913	0.00422617	0.0277888	12	FRZB/MDK/CTSK/EFEMP1/SNAI2/SOX9/SCIN/SHOX2/RUNX2/BMPR2/TRPS1/CTNNB1
GO:0010812	negative regulation of cell-substrate adhesion	12/1382	67/17913	0.00479519	0.0307346	12	COL1A1/LGALS1/FBLN1/APOD/LRP1/MMP14/DLC1/EFNA5/JAG1/THBS1/PHLDB2/ANGPT2
GO:0071674	mononuclear cell migration	12/1382	68/17913	0.00542371	0.0334513	12	CXCL12/RARRES2/MDK/NBL1/BMP5/SLIT2/CSF1/THBS1/CCL2/PDGFD/LGALS3/RPS19
GO:0003208	cardiac ventricle morphogenesis	12/1382	73/17913	0.00961033	0.0522773	12	TPM1/CPE/FOXC1/COL11A1/FOXC2/HEY2/JAG1/SMARCD3/SOX4/ENG/MEF2C/SMAD7
GO:0051881	regulation of mitochondrial membrane potential	12/1382	73/17913	0.00961033	0.0522773	12	DCN/BNIP3/SOD1/BAD/PARK7/RACK1/ARL6IP5/STOML2/PRDX3/UBB/IFI6/PRELID1
GO:0042246	tissue regeneration	12/1382	74/17913	0.010688	0.0560843	12	APOD/PTN/MDK/GJA1/YAP1/CD9/CD81/GSN/CPQ/IGF1/CDKN1A/PKM
GO:0070373	negative regulation of ERK1 and ERK2 cascade	12/1382	74/17913	0.010688	0.0560843	12	FBLN1/TIMP3/EMILIN1/ERRFI1/NDRG2/CAMK2N1/SPRED1/KLF4/ATF3/SPRY1/GSTP1/PHB
GO:0031100	animal organ regeneration	12/1382	75/17913	0.0118566	0.0605701	12	CXCL12/NNMT/GAS6/PGF/CCND1/AXL/EGFR/CDKN1A/GSTP1/ANGPT2/PHB/PKM
GO:0035050	embryonic heart tube development	12/1382	75/17913	0.0118566	0.0605701	12	FOXC1/HES1/GJA1/FOXC2/YAP1/TBX2/ENG/AHI1/IFT57/MEF2C/CTNNB1/TMED2
GO:0072332	intrinsic apoptotic signaling pathway by p53 class mediator	12/1382	75/17913	0.0118566	0.0605701	12	NUPR1/PHLDA3/PTTG1IP/CDKN1A/MIF/RPS27L/IFI16/RPL11/UBB/RPL26/DDIT4/HINT1
GO:0006809	nitric oxide biosynthetic process	12/1382	76/17913	0.0131209	0.0654478	12	CLU/CYP1B1/CAV1/AGT/SLC7A2/PTGIS/DDAH2/KLF4/ROCK2/HSP90AB1/HSP90AA1/KLF2
GO:0031397	negative regulation of protein ubiquitination	12/1382	76/17913	0.0131209	0.0654478	12	CAV1/SOX4/HSPA1B/RPL5/PARK7/HSPA1A/CAMLG/SMAD7/RPL11/RPS3/DNAJA1/UBXN1
GO:0008589	regulation of smoothened signaling pathway	12/1382	78/17913	0.0159555	0.0749719	12	SERPINE2/PRRX1/RAB34/ENPP1/SFRP1/GAS1/INTU/DYNC2H1/SHOX2/RUNX2/TULP3/CTNNA1
GO:0032204	regulation of telomere maintenance	12/1382	79/17913	0.0175353	0.0814746	12	MYC/CTNNB1/CCT3/CCT7/ERCC1/CCT4/TCP1/CCT6A/HNRNPA1/CCT2/CCT8/CCT5
GO:1900034	regulation of cellular response to heat	12/1382	79/17913	0.0175353	0.0814746	12	CRYAB/HSPA1B/BAG3/CAMK2D/YWHAE/HSP90AB1/HSPA1A/PTGES3/FKBP4/HSBP1/HSP90AA1/HSPA8
GO:0046209	nitric oxide metabolic process	12/1382	81/17913	0.0210431	0.0932979	12	CLU/CYP1B1/CAV1/AGT/SLC7A2/PTGIS/DDAH2/KLF4/ROCK2/HSP90AB1/HSP90AA1/KLF2
GO:0006970	response to osmotic stress	12/1382	82/17913	0.0229804	0.0996116	12	ERRFI1/HNMT/MAPK10/EFHD1/KCNMA1/EGFR/MYLK/YBX3/ZFP36L1/HSP90AB1/BAD/SERPINB6
GO:0014855	striated muscle cell proliferation	12/1382	82/17913	0.0229804	0.0996116	12	FOXC1/FGFR1/GJA1/FOXC2/RBP4/ANGPT1/YAP1/TBX2/HEY2/SIX1/SAV1/MEF2C
GO:0048644	muscle organ morphogenesis	12/1382	82/17913	0.0229804	0.0996116	12	COL3A1/TPM1/FOXC1/COL11A1/FOXC2/HEY2/SHOX2/MYLK/ENG/ARID5B/ADARB1/SMAD7
GO:0008625	extrinsic apoptotic signaling pathway via death domain receptors	12/1382	83/17913	0.0250459	0.104568	12	TIMP3/BEX3/SFRP1/BMP5/BAG3/THBS1/ATF3/TNFRSF1A/BAD/LGALS3/PARK7/PEA15
GO:0051492	regulation of stress fiber assembly	12/1382	83/17913	0.0250459	0.104568	12	TPM1/RHOC/SFRP1/LIMCH1/DLC1/NRP1/PFN2/SORBS3/SDC4/S100A10/PHLDB2/ROCK2
GO:0030838	positive regulation of actin filament polymerization	12/1382	84/17913	0.027244	0.112228	12	CTTN/CDC42EP5/NCKAP1/PFN2/LMOD1/SCIN/KIRREL1/ABI2/MYO1C/WASL/GSN/SNX9
GO:2001057	reactive nitrogen species metabolic process	12/1382	84/17913	0.027244	0.112228	12	CLU/CYP1B1/CAV1/AGT/SLC7A2/PTGIS/DDAH2/KLF4/ROCK2/HSP90AB1/HSP90AA1/KLF2
GO:0001942	hair follicle development	12/1382	85/17913	0.029579	0.119109	12	IGFBP5/FGF7/SOX9/PDGFA/INTU/EGFR/FST/SAV1/SNAI1/CD109/CTNNB1/INHBA
GO:1904063	negative regulation of cation transmembrane transport	12/1382	85/17913	0.029579	0.119109	12	CAV1/GEM/TWIST1/PLN/RRAD/CAMK2D/YWHAE/SESTD1/SRI/CALM2/ISCU/GSTO1
GO:0048013	ephrin receptor signaling pathway	12/1382	86/17913	0.032055	0.126602	12	MMP2/SDC2/EPHA3/EFNA5/PTK2/CHN1/WASL/ROCK2/ARPC1A/YES1/AP2M1/ACTG1
GO:0022404	molting cycle process	12/1382	87/17913	0.0346759	0.133537	12	IGFBP5/FGF7/SOX9/PDGFA/INTU/EGFR/FST/SAV1/SNAI1/CD109/CTNNB1/INHBA
GO:0022405	hair cycle process	12/1382	87/17913	0.0346759	0.133537	12	IGFBP5/FGF7/SOX9/PDGFA/INTU/EGFR/FST/SAV1/SNAI1/CD109/CTNNB1/INHBA
GO:0098773	skin epidermis development	12/1382	87/17913	0.0346759	0.133537	12	IGFBP5/FGF7/SOX9/PDGFA/INTU/EGFR/FST/SAV1/SNAI1/CD109/CTNNB1/INHBA
GO:2000117	negative regulation of cysteine-type endopeptidase activity	12/1382	87/17913	0.0346759	0.133537	12	CRYAB/GAS6/BEX3/NGFR/THBS1/KLF4/YWHAE/PARK7/IFI16/PRDX3/VEGFA/IFI6
GO:0014020	primary neural tube formation	12/1382	92/17913	0.0500814	0.170112	12	SFRP1/BMP5/TWIST1/DLC1/SDC4/TULP3/PLXNB2/CTHRC1/LMO4/IFT57/RALA/TMED2
GO:0044070	regulation of anion transport	12/1382	93/17913	0.0536452	0.177438	12	APOE/SFRP4/FGFR1/AGT/PLA2R1/THBS1/STXBP1/MIF/AHCYL1/ATP5PF/ARL6IP5/PRELID1
GO:0051261	protein depolymerization	12/1382	93/17913	0.0536452	0.177438	12	DSTN/MAP1B/EPS8/PLEKHH2/LMOD1/SCIN/LIMA1/ASPH/GSN/CFL2/RDX/HSPA8
GO:1901216	positive regulation of neuron death	12/1382	93/17913	0.0536452	0.177438	12	CLU/NUPR1/ITGA1/EGR1/BACE1/JUN/BAD/CTNNB1/FIS1/CAPN2/FOS/DDIT4
GO:1903076	regulation of protein localization to plasma membrane	12/1382	93/17913	0.0536452	0.177438	12	LRP1/MMP14/EPHA3/EGFR/DAB2/ITGB1/LGALS3/TMEM59/RER1/RACK1/SQSTM1/AP2M1
GO:0034440	lipid oxidation	12/1382	95/17913	0.061277	0.192709	12	APOD/CYGB/TWIST1/PDK4/BDH2/ACADVL/ECH1/ETFB/HADHB/ACAA2/ECHS1/HADHA
GO:0045069	regulation of viral genome replication	12/1382	95/17913	0.061277	0.192709	12	IFITM3/HACD3/NUCKS1/PPIB/ADARB1/IFI27/BANF1/IFI16/IFITM1/MPHOSPH8/PPIA/HSPA8
GO:0019886	antigen processing and presentation of exogenous peptide antigen via MHC class II	12/1382	97/17913	0.069595	0.212845	12	CTSL/CTSF/DYNLL1/DYNC1I2/KIFAP3/SEC31A/DYNC1LI2/CLTA/DCTN2/AP1S1/AP2M1/DCTN6
GO:0002495	antigen processing and presentation of peptide antigen via MHC class II	12/1382	100/17913	0.0833852	0.241465	12	CTSL/CTSF/DYNLL1/DYNC1I2/KIFAP3/SEC31A/DYNC1LI2/CLTA/DCTN2/AP1S1/AP2M1/DCTN6
GO:0048259	regulation of receptor-mediated endocytosis	12/1382	100/17913	0.0833852	0.241465	12	CLU/SFRP4/TF/ANGPT1/DAB2/ANXA2/CD63/AHI1/WASL/MTMR2/LRPAP1/VEGFA
GO:0048661	positive regulation of smooth muscle cell proliferation	12/1382	101/17913	0.088336	0.247546	12	IGFBP5/PDGFRB/MMP2/ADAMTS1/NOTCH3/AGT/EGFR/THBS1/PDGFD/JUN/IGF1/TGM2
GO:0097006	regulation of plasma lipoprotein particle levels	12/1382	102/17913	0.0934646	0.259821	12	APOE/PLA2G2A/LPL/AGT/ANXA2/PLTP/HDLBP/CNPY2/LRPAP1/CLTA/AP2M1/P4HB
GO:0002065	columnar/cuboidal epithelial cell differentiation	12/1382	106/17913	0.115752	0.302272	12	FGFR1/HES1/FAM20C/BMP5/HEY2/JAG1/SOX4/SAV1/SOD1/BAD/CDKN1A/RHEB
GO:0050905	neuromuscular process	12/1382	107/17913	0.121764	0.309529	12	RBFOX2/TMEM150C/ALDH1A3/BACE1/COMP/APP/SLC1A3/MYH10/ADARB1/CAMTA1/PNKD/HEXB
GO:0032612	interleukin-1 production	12/1382	108/17913	0.127948	0.322161	12	S100A13/GAS6/LPL/ERRFI1/HSPB1/EGR1/S1PR3/APP/IGF1/GSTP1/SPHK1/IFI16
GO:0035305	negative regulation of dephosphorylation	12/1382	111/17913	0.147523	0.357657	12	PTN/FARP1/SPRED1/MYO1D/PPP1R14A/BOD1/ROCK2/YWHAE/LGALS3/PPP1R14B/PPP1R15A/SET
GO:0007368	determination of left/right symmetry	12/1382	114/17913	0.168577	0.393274	12	GJA1/BICC1/TBX2/DAAM2/DYNC2H1/ENG/AHI1/PCSK5/DPCD/IFT57/MEF2C/TMED2
GO:0061025	membrane fusion	12/1382	117/17913	0.191024	0.419077	12	GAS6/RAB34/CAV2/CD9/ANXA2/EEA1/STXBP1/NECTIN2/CALR/SPHK1/USO1/PPIA
GO:0051928	positive regulation of calcium ion transport	12/1382	119/17913	0.206713	0.43331	12	CXCL12/PDGFRB/CAV1/THY1/S100A1/ANK2/MYLK/CCL2/LGALS3/SRI/CALM2/GSTO1
GO:0042089	cytokine biosynthetic process	12/1382	120/17913	0.214762	0.44581	12	ERRFI1/CD276/AKAP12/HSPB1/EGR1/PAWR/APP/THBS1/KLF4/PCSK5/INHBA/ZFP36
GO:0042107	cytokine metabolic process	12/1382	121/17913	0.222941	0.455471	12	ERRFI1/CD276/AKAP12/HSPB1/EGR1/PAWR/APP/THBS1/KLF4/PCSK5/INHBA/ZFP36
GO:0035023	regulation of Rho protein signal transduction	12/1382	124/17913	0.248207	0.483928	12	COL3A1/APOE/PDGFRB/FARP1/DLC1/NRP1/ARHGEF17/KANK2/ITGB1/NET1/ARHGEF12/ABL2
GO:2000134	negative regulation of G1/S transition of mitotic cell cycle	12/1382	124/17913	0.248207	0.483928	12	FHL1/CCND1/GPNMB/KANK2/SOX4/KLF4/CCL2/CDKN1A/PRMT1/RPS27L/RPL26/GADD45A
GO:0032946	positive regulation of mononuclear cell proliferation	12/1382	126/17913	0.265609	0.498981	12	VCAM1/HES1/CSF1/CD276/CD81/IL6ST/IGF1/CDKN1A/MIF/MEF2C/IGFBP2/RPS3
GO:1903322	positive regulation of protein modification by small protein conjugation or removal	12/1382	128/17913	0.283404	0.523911	12	CAV1/ANGPT1/PTTG1IP/NDFIP1/SPHK1/SMAD7/RPS2/UBB/NOP53/STUB1/CENPX/HSPA5
GO:1902807	negative regulation of cell cycle G1/S phase transition	12/1382	130/17913	0.301548	0.542075	12	FHL1/CCND1/GPNMB/KANK2/SOX4/KLF4/CCL2/CDKN1A/PRMT1/RPS27L/RPL26/GADD45A
GO:0051250	negative regulation of lymphocyte activation	12/1382	132/17913	0.319993	0.563562	12	MDK/SFRP1/AXL/PDE5A/GPNMB/TWSG1/SDC4/PAWR/LGALS3/PRDX2/SMAD7/INHBA
GO:0031644	regulation of neurological system process	12/1382	134/17913	0.338692	0.583601	12	TMEM98/AGT/TMEM108/WASF3/PARD3/S100B/APP/COMT/ROCK2/MGLL/MTMR2/AKAP9
GO:0050773	regulation of dendrite development	12/1382	139/17913	0.386235	0.631453	12	APOE/ID1/PTN/SDC2/BMP5/PTPRD/CAMSAP2/ABI2/PDLIM5/ILK/MEF2C/TMEM106B
GO:0140056	organelle localization by membrane tethering	12/1382	141/17913	0.405444	0.653255	12	CAV2/STXBP1/AHI1/DYNLL1/YWHAE/DYNC1I2/TUBB/DCTN2/TUBA1A/HSP90AA1/TUBB4B/AKAP9
GO:1902107	positive regulation of leukocyte differentiation	12/1382	143/17913	0.424691	0.673518	12	GAS6/MDK/AXL/MMP14/CSF1/KITLG/JUN/ZFP36L1/BAD/GNAS/KLF10/FOS
GO:0007088	regulation of mitotic nuclear division	12/1382	150/17913	0.491712	0.739698	12	PDGFRB/CDKN1C/CAV2/HSPA1B/NFE2L1/IGF1/HSPA1A/CHMP5/SPHK1/PSMG2/PHB2/CDC26
GO:0090316	positive regulation of intracellular protein transport	12/1382	150/17913	0.491712	0.739698	12	GAS6/CD81/TCF7L2/BAG3/MYO1C/LEPROT/YWHAE/PDCD5/FIS1/RAN/FLNA/TOMM7
GO:0002695	negative regulation of leukocyte activation	12/1382	163/17913	0.610045	0.814331	12	MDK/SFRP1/AXL/PDE5A/GPNMB/TWSG1/SDC4/PAWR/LGALS3/PRDX2/SMAD7/INHBA
GO:0016241	regulation of macroautophagy	12/1382	166/17913	0.635469	0.827802	12	DCN/NUPR1/FEZ1/BAG3/BNIP3/RRAGA/SCOC/RHEB/OPTN/RNF5/ATG101/TOMM7
GO:0007187	G protein-coupled receptor signaling pathway, coupled to cyclic nucleotide second messenger	12/1382	178/17913	0.72781	0.870635	12	PTH1R/AGT/PLN/SSTR2/EDNRA/RAMP1/AKAP12/S1PR3/CCL2/ADCY3/GNAS/FLNA
GO:0002440	production of molecular mediator of immune response	12/1382	191/17913	0.809129	0.916496	12	GAS6/RBP4/ANGPT1/IL1R1/CD81/KDELR1/MIF/CUEDC2/SMAD7/HSPD1/DDX1/ERCC1
GO:0000075	cell cycle checkpoint	12/1382	197/17913	0.84001	0.933095	12	CCND1/SOX4/MAP3K20/CDKN1A/RPL24/PRMT1/RPS27L/PSMG2/PEA15/NOP53/RPL26/GADD45A
GO:0051607	defense response to virus	12/1382	231/17913	0.948606	0.981753	12	IFITM3/HTRA1/BNIP3/ADARB1/IFI27/IFI16/DDX1/NOP53/C1QBP/FLNA/IFI6/DDIT4
GO:0008654	phospholipid biosynthetic process	12/1382	251/17913	0.976031	0.995229	12	PLA2G2A/PTPN13/PDGFA/PLEKHA4/ISYNA1/MTMR2/CAPN2/DPM3/PIGP/HEXB/PYURF/FDPS
GO:0043414	macromolecule methylation	12/1382	276/17913	0.991502	0.999851	12	LMNA/COPRS/MYC/MGMT/SETD7/CTNNB1/PRMT1/GNAS/TRMT112/MPHOSPH8/FOS/NTMT1
GO:0007263	nitric oxide mediated signal transduction	11/1382	26/17913	1.44631e-06	4.05916e-05	11	APOE/MT2A/RASD1/AGT/NDNF/EGFR/PDE5A/THBS1/DDAH2/GUCY1A1/VEGFA
GO:0061437	renal system vasculature development	11/1382	26/17913	1.44631e-06	4.05916e-05	11	ACTA2/PDGFRB/PDGFRA/HES1/NOTCH3/FOXC2/ANGPT1/NRP1/EGR1/PDGFD/ANGPT2
GO:0061440	kidney vasculature development	11/1382	26/17913	1.44631e-06	4.05916e-05	11	ACTA2/PDGFRB/PDGFRA/HES1/NOTCH3/FOXC2/ANGPT1/NRP1/EGR1/PDGFD/ANGPT2
GO:0042407	cristae formation	11/1382	30/17913	7.66281e-06	0.000161296	11	ATP5MC3/ATP5PF/CHCHD10/ATP5MC1/ATP5F1C/UQCC3/ATP5PO/ATP5F1D/ATP5F1B/ATP5MF/ATP5ME
GO:0007435	salivary gland morphogenesis	11/1382	34/17913	3.0094e-05	0.000490417	11	FGFR1/FGF7/NFIB/NRP1/SNAI2/PDGFA/EGFR/NTN4/TWSG1/PLXND1/TGM2
GO:2000826	regulation of heart morphogenesis	11/1382	39/17913	0.000123151	0.00165302	11	FOXC1/HES1/FOXC2/TWIST1/SOX9/TBX2/SIX1/JAG1/ENG/BMPR2/CTNNB1
GO:0090184	positive regulation of kidney development	11/1382	41/17913	0.000201178	0.00251224	11	PDGFRB/AGT/SOX9/PDGFA/FOXD1/SIX1/EGR1/PDGFD/MAGED1/MYC/VEGFA
GO:2001239	regulation of extrinsic apoptotic signaling pathway in absence of ligand	11/1382	43/17913	0.000317463	0.00358005	11	FGFR1/UNC5B/SNAI2/SRPX/HSPA1B/CTNNA1/HSPA1A/PRDX2/COL2A1/INHBA/IFI6
GO:0048483	autonomic nervous system development	11/1382	44/17913	0.000394111	0.00423612	11	FN1/VCAM1/HES1/NRP2/NRP1/EDNRA/SIX1/SOX4/NAV2/ADARB1/CTNNB1
GO:0001974	blood vessel remodeling	11/1382	45/17913	0.000485691	0.00492515	11	BGN/FOXC1/EPAS1/FOXC2/AXL/AGT/JAG1/CST3/BMPR2/MEF2C/TGM2
GO:0018208	peptidyl-proline modification	11/1382	45/17913	0.000485691	0.00492515	11	PPIC/FKBP10/FKBP9/FKBP7/CRTAP/PPIB/FKBP2/PIN4/PPIA/P4HB/NTMT1
GO:0006984	ER-nucleus signaling pathway	11/1382	46/17913	0.000594402	0.00578475	11	CCL2/ATF3/CALR/INSIG2/TMCO1/MBTPS1/ATP2A2/HSPA5/PPP1R15A/HSP90B1/EIF2A
GO:0030857	negative regulation of epithelial cell differentiation	11/1382	46/17913	0.000594402	0.00578475	11	FRZB/ID1/CAV1/HES1/CCND1/YAP1/SOX9/JAG1/S1PR3/CTNNB1/ZEB1
GO:0031103	axon regeneration	11/1382	48/17913	0.000873063	0.00792747	11	TNC/APOD/LRP1/MAP1B/PTN/LAMB2/JAM3/KLF4/JUN/SPP1/CTNNA1
GO:0030195	negative regulation of blood coagulation	11/1382	49/17913	0.00104848	0.00927767	11	APOE/SERPINE2/SERPING1/PDGFRA/TFPI/C1QTNF1/PDGFA/PRKG1/FAP/CD9/THBS1
GO:0060976	coronary vasculature development	11/1382	50/17913	0.00125195	0.0107362	11	PDGFRB/LTBP1/NRP1/DYNC2H1/HEY2/SPRED1/VEGFB/PCSK5/MYH10/PLXND1/VEGFA
GO:1905517	macrophage migration	11/1382	50/17913	0.00125195	0.0107362	11	RARRES2/MDK/EMILIN1/MMP14/CSF1/CD9/CD81/THBS1/CCL2/LGALS3/MIF
GO:0032206	positive regulation of telomere maintenance	11/1382	51/17913	0.00148677	0.01215	11	CTNNB1/CCT3/CCT7/ERCC1/CCT4/TCP1/CCT6A/HNRNPA1/CCT2/CCT8/CCT5
GO:1900024	regulation of substrate adhesion-dependent cell spreading	11/1382	51/17913	0.00148677	0.01215	11	FBLN1/MDK/PDPN/NRP1/DOCK1/EFNA5/PTK2/S100A10/CALR/C1QBP/FLNA
GO:0045604	regulation of epidermal cell differentiation	11/1382	57/17913	0.00376548	0.0253407	11	SFRP4/FOXC1/HES1/ERRFI1/CTSK/CTSL/HEY2/CD109/ZFP36L1/ROCK2/ZFP36
GO:0048857	neural nucleus development	11/1382	62/17913	0.00729076	0.0425575	11	S100A1/CKB/NFIB/NDRG2/ALDH1A3/DYNLL1/YWHAE/YWHAQ/ATP5PF/CALM2/HSPA5
GO:0006487	protein N-linked glycosylation	11/1382	63/17913	0.00823315	0.0463073	11	TUSC3/OSTC/DAD1/MCFD2/LMAN1/DPM3/KRTCAP2/PGM3/TMEM165/TMEM258/OST4
GO:0071277	cellular response to calcium ion	11/1382	63/17913	0.00823315	0.0463073	11	CLIC4/JUN/CAMK2D/AKR1C3/MEF2C/FOSB/MEF2A/JUNB/HSPA5/FOS/FUS
GO:0071300	cellular response to retinoic acid	11/1382	65/17913	0.0103988	0.0554571	11	COL1A1/SERPINF1/TNC/YAP1/SOX9/EPHA3/KLF4/ABL2/PHB2/YES1/NDUFA13
GO:0050918	positive chemotaxis	11/1382	67/17913	0.0129766	0.0649647	11	LRP1/FGF7/PGF/ANGPT1/NRP1/GPNMB/VEGFB/LGALS3/MIF/ANGPT2/VEGFA
GO:0072091	regulation of stem cell proliferation	11/1382	68/17913	0.0144341	0.0700528	11	FBLN1/PTN/LTBP3/SNAI2/YAP1/KITLG/SMARCD3/ZFP36L1/CTNNA1/CTNNB1/VEGFA
GO:0007422	peripheral nervous system development	11/1382	69/17913	0.0160117	0.0750862	11	PMP22/NTRK2/LAMB2/LGI4/GSTM3/PARD3/GPC1/NDRG1/SOD1/ILK/SLC5A3
GO:0009988	cell-cell recognition	11/1382	69/17913	0.0160117	0.0750862	11	CD9/CD81/LGALS3/CCT3/VDAC2/CCT7/CCT4/TCP1/CCT2/CCT8/CCT5
GO:0001707	mesoderm formation	11/1382	71/17913	0.0195493	0.0876217	11	FOXC1/FGFR1/FOXC2/TWSG1/ITGB1/KLF4/SNAI1/EXT2/BMPR2/ITGA8/INHBA
GO:0031670	cellular response to nutrient	11/1382	71/17913	0.0195493	0.0876217	11	COL1A1/TNC/BGLAP/GAS6/PTN/LPL/SFRP1/SNAI2/KANK2/SOD1/HSP90B1
GO:1901879	regulation of protein depolymerization	11/1382	71/17913	0.0195493	0.0876217	11	DSTN/MAP1B/EPS8/PLEKHH2/LMOD1/SCIN/LIMA1/ASPH/GSN/CFL2/RDX
GO:0043462	regulation of ATPase activity	11/1382	72/17913	0.0215204	0.094462	11	TPM2/TPM1/CNN3/PLN/PFN2/DNAJB4/DNAJC15/DNAJC19/AHSA1/SNRNP70/DNAJA1
GO:0043627	response to estrogen	11/1382	73/17913	0.0236335	0.101375	11	BGLAP/PDGFRB/CAV1/CCND1/SFRP1/MMP14/GSTM3/TNFRSF11B/COMT/CTNNA1/IGFBP2
GO:0048332	mesoderm morphogenesis	11/1382	73/17913	0.0236335	0.101375	11	FOXC1/FGFR1/FOXC2/TWSG1/ITGB1/KLF4/SNAI1/EXT2/BMPR2/ITGA8/INHBA
GO:0001937	negative regulation of endothelial cell proliferation	11/1382	75/17913	0.0283064	0.115553	11	APOE/SPARC/CAV1/NR2F2/GJA1/SULF1/CAV2/NGFR/THBS1/CCL2/MEF2C
GO:0003281	ventricular septum development	11/1382	76/17913	0.0308763	0.122644	11	HES1/LTBP1/SLIT2/SLIT3/HEY2/SOX4/SAV1/BMPR2/LMO4/TRIP11/SMAD7
GO:0060415	muscle tissue morphogenesis	11/1382	76/17913	0.0308763	0.122644	11	COL3A1/TPM1/FOXC1/COL11A1/FOXC2/HEY2/SHOX2/MYLK/ENG/ADARB1/SMAD7
GO:0030279	negative regulation of ossification	11/1382	77/17913	0.0336081	0.129965	11	IGFBP5/ID3/ID1/MDK/ENPP1/SFRP1/TWIST1/SOX9/TWSG1/MEF2C/TOB1
GO:0045685	regulation of glial cell differentiation	11/1382	77/17913	0.0336081	0.129965	11	SERPINE2/ID4/PTN/MDK/HES1/TMEM98/DAAM2/IL6ST/APP/CTNNB1/RHEB
GO:0048708	astrocyte differentiation	11/1382	77/17913	0.0336081	0.129965	11	SERPINE2/LRP1/ID4/HES1/LAMB2/SOX9/EGFR/IL6ST/VIM/S100B/APP
GO:0051851	modification by host of symbiont morphology or physiology	11/1382	77/17913	0.0336081	0.129965	11	APOE/CAV2/ANXA2/JUN/NUCKS1/PPIB/IFI27/PSMC3/CALM2/SUGT1/HSPA8
GO:1905954	positive regulation of lipid localization	11/1382	78/17913	0.0365062	0.136334	11	APOE/LRP1/LPL/C1QTNF1/PLA2R1/ANXA2/HILPDA/PLTP/SPP1/MIF/PRELID1
GO:0036503	ERAD pathway	11/1382	79/17913	0.0395751	0.144398	11	CAV1/RCN3/ERLEC1/OS9/STUB1/HSPA5/RNF5/UBXN1/HSP90B1/SEC61B/SDF2L1
GO:0043154	negative regulation of cysteine-type endopeptidase activity involved in apoptotic process	11/1382	79/17913	0.0395751	0.144398	11	CRYAB/GAS6/BEX3/NGFR/THBS1/KLF4/YWHAE/PARK7/PRDX3/VEGFA/IFI6
GO:2001021	negative regulation of response to DNA damage stimulus	11/1382	79/17913	0.0395751	0.144398	11	CLU/CXCL12/ACKR3/TWIST1/SNAI2/SNAI1/PTTG1IP/MAGEF1/MIF/ERCC1/RPS3
GO:0051899	membrane depolarization	11/1382	81/17913	0.0462404	0.162734	11	DCN/CAV1/GJA1/FHL1/ANK2/JUN/CAMK2D/PARK7/RACK1/SMAD7/IFI6
GO:2000060	positive regulation of ubiquitin-dependent protein catabolic process	11/1382	82/17913	0.049844	0.169503	11	CLU/CAV1/DAB2/PTK2/MAGEF1/HSPA1A/RACK1/SMAD7/NOP53/STUB1/SUMO2
GO:0003073	regulation of systemic arterial blood pressure	11/1382	83/17913	0.0536326	0.177438	11	TPM1/EMP2/GAS6/NR2F2/GJA1/AGT/ENPEP/NAV2/PCSK5/BMPR2/CES1
GO:0032410	negative regulation of transporter activity	11/1382	83/17913	0.0536326	0.177438	11	CAV1/GEM/TWIST1/PLN/RRAD/CAMK2D/YWHAE/NDFIP1/SRI/CALM2/GSTO1
GO:0051781	positive regulation of cell division	11/1382	84/17913	0.057609	0.187872	11	PTN/FGF7/MDK/PGF/PDGFA/PDGFC/VEGFB/PDGFD/YBX1/VEGFA/LBH
GO:1901019	regulation of calcium ion transmembrane transporter activity	11/1382	84/17913	0.057609	0.187872	11	S100A1/GEM/PLN/ANK2/AHNAK/RRAD/CAMK2D/YWHAE/SRI/CALM2/GSTO1
GO:0042475	odontogenesis of dentin-containing tooth	11/1382	85/17913	0.0617756	0.193864	11	HTRA1/TNC/FOXC1/PDGFRA/NFIC/FAM20C/CSF1/TNFRSF11B/RUNX2/CTNNA1/CTNNB1
GO:0070542	response to fatty acid	11/1382	85/17913	0.0617756	0.193864	11	ID3/TNC/LPL/SFRP1/PDK4/AKR1C2/PTGFR/BAD/AKR1C3/INSIG2/NME1
GO:0001843	neural tube closure	11/1382	86/17913	0.0661346	0.20436	11	SFRP1/TWIST1/DLC1/SDC4/TULP3/PLXNB2/CTHRC1/LMO4/IFT57/RALA/TMED2
GO:1903725	regulation of phospholipid metabolic process	11/1382	86/17913	0.0661346	0.20436	11	PDGFRB/PDGFRA/PDGFA/FGFR3/PTK2/CD81/SOCS3/KLF4/MTMR2/CAPN2/STOML2
GO:0060606	tube closure	11/1382	87/17913	0.0706879	0.21524	11	SFRP1/TWIST1/DLC1/SDC4/TULP3/PLXNB2/CTHRC1/LMO4/IFT57/RALA/TMED2
GO:1904029	regulation of cyclin-dependent protein kinase activity	11/1382	87/17913	0.0706879	0.21524	11	CDKN1C/NR2F2/CCND1/CAMK2N1/EGFR/SERTAD1/PKD1/HSP90AB1/CDKN1A/HEXIM1/GADD45A
GO:1904705	regulation of vascular smooth muscle cell proliferation	11/1382	88/17913	0.0754368	0.223694	11	IGFBP5/TPM1/MMP2/ADAMTS1/AGT/PRKG1/JUN/IGF1/CDKN1A/GSTP1/MEF2C
GO:1990874	vascular smooth muscle cell proliferation	11/1382	88/17913	0.0754368	0.223694	11	IGFBP5/TPM1/MMP2/ADAMTS1/AGT/PRKG1/JUN/IGF1/CDKN1A/GSTP1/MEF2C
GO:0045638	negative regulation of myeloid cell differentiation	11/1382	92/17913	0.0964052	0.264031	11	FBN1/SFRP1/MAFB/ZFP36L1/MYC/TOB2/CTNNB1/PRMT1/NME1/INHBA/ZFP36
GO:0019395	fatty acid oxidation	11/1382	93/17913	0.102141	0.277161	11	CYGB/TWIST1/PDK4/BDH2/ACADVL/ECH1/ETFB/HADHB/ACAA2/ECHS1/HADHA
GO:0048284	organelle fusion	11/1382	94/17913	0.108074	0.286941	11	RAB34/CAV2/ANXA2/EEA1/STXBP1/BNIP3/CALR/FIS1/SPHK1/STOML2/USO1
GO:0010660	regulation of muscle cell apoptotic process	11/1382	96/17913	0.120524	0.30796	11	NUPR1/MDK/AGT/HEY2/HSPB6/BAG3/BNIP3/CAMK2D/ILK/IGF1/CAPN2
GO:0032652	regulation of interleukin-1 production	11/1382	96/17913	0.120524	0.30796	11	GAS6/LPL/ERRFI1/HSPB1/EGR1/S1PR3/APP/IGF1/GSTP1/SPHK1/IFI16
GO:0050848	regulation of calcium-mediated signaling	11/1382	98/17913	0.133743	0.334026	11	PLN/LMCD1/FHL2/CAMK2D/IGF1/CAMTA1/RCAN1/SRI/CALM2/GSTO1/HINT1
GO:0010596	negative regulation of endothelial cell migration	11/1382	99/17913	0.140634	0.342975	11	DCN/APOE/SERPINF1/NR2F2/SLIT2/SPRED1/ADAMTS9/THBS1/KLF4/MEF2C/ANGPT2
GO:0010657	muscle cell apoptotic process	11/1382	100/17913	0.14771	0.357657	11	NUPR1/MDK/AGT/HEY2/HSPB6/BAG3/BNIP3/CAMK2D/ILK/IGF1/CAPN2
GO:0097530	granulocyte migration	11/1382	100/17913	0.14771	0.357657	11	RARRES2/MDK/SLIT2/CSF1/JAM3/IL1R1/ITGA1/THBS1/LGALS3/C1QBP/JAGN1
GO:0010923	negative regulation of phosphatase activity	11/1382	101/17913	0.154966	0.369274	11	PTN/FARP1/SPRED1/MYO1D/PPP1R14A/BOD1/ROCK2/LGALS3/PPP1R14B/PPP1R15A/SET
GO:1903426	regulation of reactive oxygen species biosynthetic process	11/1382	101/17913	0.154966	0.369274	11	CLU/CAV1/AGT/PTGIS/DDAH2/KLF4/ROCK2/HSP90AB1/PARK7/HSP90AA1/KLF2
GO:0071887	leukocyte apoptotic process	11/1382	103/17913	0.170009	0.396449	11	CXCL12/GAS6/CTSL/AXL/KITLG/KDELR1/LGALS3/MIF/MEF2C/TCP1/PRELID1
GO:0051963	regulation of synapse assembly	11/1382	105/17913	0.185728	0.409723	11	NTRK2/FLRT2/PTPRD/TPBG/THBS2/EFNA5/SIX1/PTK2/APP/PDLIM5/MEF2C
GO:0014902	myotube differentiation	11/1382	107/17913	0.202088	0.433071	11	CAV2/MMP14/TMEM119/EHD2/SHOX2/CD9/CD81/MYOF/IGF1/MEF2C/CAPN2
GO:0050684	regulation of mRNA processing	11/1382	108/17913	0.210496	0.439709	11	RBFOX2/ZFP36L1/AHCYL1/PRDX6/NSRP1/SAP18/SNRNP70/C1QBP/HSPA8/HNRNPA1/SRSF7
GO:0006096	glycolytic process	11/1382	110/17913	0.227739	0.46357	11	NUPR1/ZBTB20/IGF1/LDHA/TPI1/EIF6/PKM/PFKP/PGAM1/DDIT4/ENO1
GO:0031398	positive regulation of protein ubiquitination	11/1382	110/17913	0.227739	0.46357	11	CAV1/ANGPT1/PTTG1IP/NDFIP1/SPHK1/SMAD7/RPS2/UBB/STUB1/CENPX/HSPA5
GO:0050864	regulation of B cell activation	11/1382	110/17913	0.227739	0.46357	11	SFRP1/MMP14/CD81/PAWR/ZFP36L1/BAD/CDKN1A/MIF/MEF2C/INHBA/AHR
GO:0006757	ATP generation from ADP	11/1382	111/17913	0.236563	0.468489	11	NUPR1/ZBTB20/IGF1/LDHA/TPI1/EIF6/PKM/PFKP/PGAM1/DDIT4/ENO1
GO:0009116	nucleoside metabolic process	11/1382	114/17913	0.26377	0.498826	11	NT5E/NME3/NME4/ADK/ERH/RAN/NME1/CMPK1/IMPDH2/DNPH1/APRT
GO:0042866	pyruvate biosynthetic process	11/1382	114/17913	0.26377	0.498826	11	NUPR1/ZBTB20/IGF1/LDHA/TPI1/EIF6/PKM/PFKP/PGAM1/DDIT4/ENO1
GO:1901222	regulation of NIK/NF-kappaB signaling	11/1382	114/17913	0.26377	0.498826	11	UACA/SASH1/TRIP6/EGFR/APP/PRDX1/ILK/COPS8/CALR/SPHK1/RPS3
GO:0046425	regulation of JAK-STAT cascade	11/1382	120/17913	0.320907	0.563562	11	CYP1B1/CAV1/HES1/AGT/GHR/FGFR3/IL6ST/SOCS3/LEPROT/TNFRSF1A/IGF1
GO:1903038	negative regulation of leukocyte cell-cell adhesion	11/1382	121/17913	0.330703	0.572142	11	CXCL12/MDK/PDE5A/GPNMB/TWSG1/SDC4/PAWR/KLF4/LGALS3/PRDX2/SMAD7
GO:0001508	action potential	11/1382	123/17913	0.350469	0.594395	11	CAV1/GJA1/NTRK2/ANK2/CAMK2D/YWHAE/SRI/ATP2A2/ATP1A1/FLNA/AKAP9
GO:0050671	positive regulation of lymphocyte proliferation	11/1382	125/17913	0.370417	0.616289	11	VCAM1/HES1/CD276/CD81/IL6ST/IGF1/CDKN1A/MIF/MEF2C/IGFBP2/RPS3
GO:0006956	complement activation	11/1382	128/17913	0.40056	0.648302	11	CLU/CFH/SERPING1/C1R/C1S/A2M/CFD/CD81/CD59/PHB/C1QBP
GO:1900542	regulation of purine nucleotide metabolic process	11/1382	128/17913	0.40056	0.648302	11	NUPR1/PDK4/ZBTB20/IGF1/PARK7/DNAJC15/ISCU/EIF6/PGAM1/DDIT4/ENO1
GO:1904892	regulation of STAT cascade	11/1382	129/17913	0.410639	0.653527	11	CYP1B1/CAV1/HES1/AGT/GHR/FGFR3/IL6ST/SOCS3/LEPROT/TNFRSF1A/IGF1
GO:0001889	liver development	11/1382	130/17913	0.420723	0.667798	11	FRZB/PTN/MDK/HES1/CCND1/SOX9/EGFR/PKD1/ARID5B/JUN/PKM
GO:0006140	regulation of nucleotide metabolic process	11/1382	132/17913	0.440879	0.68665	11	NUPR1/PDK4/ZBTB20/IGF1/PARK7/DNAJC15/ISCU/EIF6/PGAM1/DDIT4/ENO1
GO:0061008	hepaticobiliary system development	11/1382	133/17913	0.450939	0.699661	11	FRZB/PTN/MDK/HES1/CCND1/SOX9/EGFR/PKD1/ARID5B/JUN/PKM
GO:0002433	immune response-regulating cell surface receptor signaling pathway involved in phagocytosis	11/1382	139/17913	0.510647	0.760158	11	NCKAP1/DOCK1/PTK2/MYO10/MYO1C/WASL/HSP90AB1/ARPC1A/YES1/HSP90AA1/ACTG1
GO:0038096	Fc-gamma receptor signaling pathway involved in phagocytosis	11/1382	139/17913	0.510647	0.760158	11	NCKAP1/DOCK1/PTK2/MYO10/MYO1C/WASL/HSP90AB1/ARPC1A/YES1/HSP90AA1/ACTG1
GO:0016482	cytosolic transport	11/1382	140/17913	0.520438	0.767943	11	EMP2/RHOBTB3/DAB2/EEA1/MYO1D/ARL1/RDX/MTMR2/KIF1C/CES1/AP1S1
GO:0038094	Fc-gamma receptor signaling pathway	11/1382	141/17913	0.530168	0.779609	11	NCKAP1/DOCK1/PTK2/MYO10/MYO1C/WASL/HSP90AB1/ARPC1A/YES1/HSP90AA1/ACTG1
GO:0002431	Fc receptor mediated stimulatory signaling pathway	11/1382	142/17913	0.539833	0.780615	11	NCKAP1/DOCK1/PTK2/MYO10/MYO1C/WASL/HSP90AB1/ARPC1A/YES1/HSP90AA1/ACTG1
GO:0050777	negative regulation of immune response	11/1382	143/17913	0.549428	0.780615	11	COL3A1/SERPING1/A2M/ANGPT1/CD59/LGALS3/IFI16/CUEDC2/SMAD7/RPS19/PSMA1
GO:0050806	positive regulation of synaptic transmission	11/1382	145/17913	0.568391	0.797412	11	APOE/SERPINE2/PTN/NTRK2/EGFR/S100B/APP/STXBP1/CCL2/SLC1A3/SQSTM1
GO:0002224	toll-like receptor signaling pathway	11/1382	147/17913	0.587021	0.80169	11	CAV1/S100A1/CTSK/CTSL/COLEC12/CTSB/RPS27A/UBB/HSPD1/RFTN1/HSP90B1
GO:0007093	mitotic cell cycle checkpoint	11/1382	147/17913	0.587021	0.80169	11	CCND1/SOX4/MAP3K20/CDKN1A/RPL24/PRMT1/RPS27L/PSMG2/NOP53/RPL26/GADD45A
GO:0015698	inorganic anion transport	11/1382	150/17913	0.614276	0.814331	11	SFRP4/FGFR1/FXYD1/ENPP1/PCYOX1/CLIC4/SLC1A3/ANKH/VDAC2/VDAC1/VDAC3
GO:0001906	cell killing	11/1382	156/17913	0.665976	0.840869	11	CFH/EMP2/CADM1/PRDX1/CD59/NECTIN2/HSP90AB1/BAD/TUBB/RPS19/TUBB4B
GO:0051262	protein tetramerization	11/1382	166/17913	0.742674	0.879251	11	GPX3/ALDH1A3/ANXA2/CBY1/PKD1/S100A10/KRT10/ST13/PKM/RPS19/IMPDH2
GO:0006813	potassium ion transport	11/1382	194/17913	0.890848	0.956004	11	CAV1/FXYD1/FHL1/KCNMA1/ANK2/CD63/SLC1A3/YWHAE/ATP1A1/FLNA/AKAP9
GO:0002699	positive regulation of immune effector process	11/1382	198/17913	0.904767	0.962256	11	RBP4/IL1R1/CADM1/CD81/STXBP1/NECTIN2/MIF/PHB/HSPD1/DDX1/RPS19
GO:0065004	protein-DNA complex assembly	11/1382	210/17913	0.937927	0.976956	11	SOX9/HEY2/THRA/TCF4/SHPRH/NPM1/GTF2H5/RPS27A/UBB/CENPX/SET
GO:0098813	nuclear chromosome segregation	11/1382	220/17913	0.957421	0.985421	11	GEM/P3H4/BOD1/SUN1/CHMP5/CTNNB1/RAN/PSMG2/PHB2/CENPX/CDC26
GO:0045017	glycerolipid biosynthetic process	11/1382	246/17913	0.98521	0.997233	11	PLA2G2A/LPL/PTPN13/PDGFA/PLEKHA4/ANG/MTMR2/CAPN2/DPM3/PIGP/PYURF
GO:0071103	DNA conformation change	11/1382	279/17913	0.996635	1	11	SOX9/SMARCA1/PURA/SHPRH/NPM1/GTF2H5/RPS27A/UBB/DDX1/CENPX/SET
GO:0042776	mitochondrial ATP synthesis coupled proton transport	10/1382	21/17913	1.15829e-06	3.38769e-05	10	ATP5MC3/ATP5PF/STOML2/ATP5MC1/ATP5F1C/ATP5PO/ATP5F1D/ATP5F1B/ATP5MF/ATP5ME
GO:0015985	energy coupled proton transport, down electrochemical gradient	10/1382	23/17913	3.25517e-06	8.11166e-05	10	ATP5MC3/ATP5PF/STOML2/ATP5MC1/ATP5F1C/ATP5PO/ATP5F1D/ATP5F1B/ATP5MF/ATP5ME
GO:0015986	ATP synthesis coupled proton transport	10/1382	23/17913	3.25517e-06	8.11166e-05	10	ATP5MC3/ATP5PF/STOML2/ATP5MC1/ATP5F1C/ATP5PO/ATP5F1D/ATP5F1B/ATP5MF/ATP5ME
GO:0072012	glomerulus vasculature development	10/1382	24/17913	5.19463e-06	0.000119778	10	ACTA2/PDGFRB/PDGFRA/HES1/NOTCH3/FOXC2/ANGPT1/EGR1/PDGFD/ANGPT2
GO:0002063	chondrocyte development	10/1382	27/17913	1.803e-05	0.000330669	10	ACAN/COL11A1/SERPINH1/SULF1/SOX9/COL27A1/SHOX2/RUNX2/COMP/BMPR2
GO:0003180	aortic valve morphogenesis	10/1382	28/17913	2.61136e-05	0.000437088	10	EMILIN1/SLIT2/SLIT3/TWIST1/SNAI2/SOX9/HEY2/JAG1/SNAI1/ROCK2
GO:0085029	extracellular matrix assembly	10/1382	28/17913	2.61136e-05	0.000437088	10	COL1A2/GAS6/EMILIN1/EFEMP2/LOX/AGT/SOX9/ANTXR1/GPM6B/MYH11
GO:0071276	cellular response to cadmium ion	10/1382	32/17913	9.65258e-05	0.00132771	10	MT1E/MT1A/EGFR/MT1X/SOD1/GSN/JUN/AKR1C3/MT1F/FOS
GO:0032212	positive regulation of telomere maintenance via telomerase	10/1382	34/17913	0.000170186	0.00219426	10	CTNNB1/CCT3/CCT7/CCT4/TCP1/CCT6A/HNRNPA1/CCT2/CCT8/CCT5
GO:0001893	maternal placenta development	10/1382	35/17913	0.000221923	0.00268677	10	PTN/NR2F2/GJA1/PTGIS/BMPR2/SPP1/CTSB/PRDX3/JUNB/TMED2
GO:0061077	chaperone-mediated protein folding	10/1382	35/17913	0.000221923	0.00268677	10	CLU/HSPB6/HSPB1/CRTAP/PPIB/PDCD5/PTGES3/FKBP4/PDIA4/CCT2
GO:0110111	negative regulation of animal organ morphogenesis	10/1382	35/17913	0.000221923	0.00268677	10	FOXC1/CHAD/ASPN/SULF1/FOXC2/NFIB/TBX2/TNFRSF11B/BMPR2/CTNNB1
GO:1901998	toxin transport	10/1382	35/17913	0.000221923	0.00268677	10	NRP1/BNIP3/CCT3/CCT7/CCT4/TCP1/HSPA5/CCT2/CCT8/CCT5
GO:1904358	positive regulation of telomere maintenance via telomere lengthening	10/1382	37/17913	0.000365378	0.0039734	10	CTNNB1/CCT3/CCT7/CCT4/TCP1/CCT6A/HNRNPA1/CCT2/CCT8/CCT5
GO:0010043	response to zinc ion	10/1382	44/17913	0.00158686	0.0127545	10	MT2A/MT1E/MT1M/VCAM1/BGLAP/MT1A/PLN/MT1X/CRIP1/MT1F
GO:0060393	regulation of pathway-restricted SMAD protein phosphorylation	10/1382	44/17913	0.00158686	0.0127545	10	PMEPA1/EMILIN1/BMP5/TWSG1/RBPMS/DAB2/ENG/BMPR2/SMAD7/INHBA
GO:0003197	endocardial cushion development	10/1382	45/17913	0.00190148	0.014799	10	BMP5/TWIST1/SNAI2/SOX9/TBX2/HEY2/JAG1/ENG/SNAI1/BMPR2
GO:0071675	regulation of mononuclear cell migration	10/1382	45/17913	0.00190148	0.014799	10	CXCL12/RARRES2/MDK/NBL1/BMP5/SLIT2/CSF1/THBS1/PDGFD/LGALS3
GO:0060324	face development	10/1382	46/17913	0.00226455	0.0169826	10	COL1A1/MMP2/PDGFRA/DLX5/RRAS/CRISPLD1/ALDH1A3/ASPH/CRISPLD2/ARID5B
GO:0035722	interleukin-12-mediated signaling pathway	10/1382	47/17913	0.00268128	0.0194262	10	ANXA2/SOD1/MIF/RPLP0/RALA/GSTO1/TCP1/PPIA/P4HB/PSME2
GO:1903115	regulation of actin filament-based movement	10/1382	47/17913	0.00268128	0.0194262	10	CAV1/PDPN/PLN/ANK2/CAMK2D/SRI/ATP2A2/ATP1A1/FLNA/AKAP9
GO:0060389	pathway-restricted SMAD protein phosphorylation	10/1382	48/17913	0.00315713	0.0221517	10	PMEPA1/EMILIN1/BMP5/TWSG1/RBPMS/DAB2/ENG/BMPR2/SMAD7/INHBA
GO:0010712	regulation of collagen metabolic process	10/1382	49/17913	0.00369781	0.0249984	10	PDGFRB/EMILIN1/ERRFI1/CYGB/LARP6/FAP/CST3/ITGB1/VIM/ENG
GO:0048260	positive regulation of receptor-mediated endocytosis	10/1382	49/17913	0.00369781	0.0249984	10	CLU/SFRP4/TF/ANGPT1/DAB2/ANXA2/CD63/AHI1/WASL/VEGFA
GO:0071349	cellular response to interleukin-12	10/1382	49/17913	0.00369781	0.0249984	10	ANXA2/SOD1/MIF/RPLP0/RALA/GSTO1/TCP1/PPIA/P4HB/PSME2
GO:0002931	response to ischemia	10/1382	50/17913	0.00430927	0.0281394	10	CAV1/GJA1/CSF1/NDNF/EGR1/ROCK2/EEF2/SQSTM1/STUB1/EIF4EBP1
GO:0008347	glial cell migration	10/1382	50/17913	0.00430927	0.0281394	10	LRP1/MMP14/CSF1/NDN/LAMB1/CSPG4/CCL2/SUN1/CTNNB1/HEXB
GO:0070671	response to interleukin-12	10/1382	50/17913	0.00430927	0.0281394	10	ANXA2/SOD1/MIF/RPLP0/RALA/GSTO1/TCP1/PPIA/P4HB/PSME2
GO:0001954	positive regulation of cell-matrix adhesion	10/1382	51/17913	0.00499769	0.0317396	10	EMP2/THY1/SFRP1/CSF1/NRP1/COL16A1/SDC4/S100A10/ILK/VEGFA
GO:0021545	cranial nerve development	10/1382	51/17913	0.00499769	0.0317396	10	HES1/NRP2/NRP1/SIX1/MAFB/NAV2/SLC1A3/ADARB1/CTNNB1/RPL24
GO:0030239	myofibril assembly	10/1382	51/17913	0.00499769	0.0317396	10	TPM1/PDGFRB/PDGFRA/ITGB1/MYH11/MYH10/CFL2/MEF2C/MEF2A/ACTG1
GO:0051496	positive regulation of stress fiber assembly	10/1382	51/17913	0.00499769	0.0317396	10	TPM1/RHOC/SFRP1/LIMCH1/NRP1/PFN2/SORBS3/SDC4/S100A10/ROCK2
GO:0032210	regulation of telomere maintenance via telomerase	10/1382	53/17913	0.00663097	0.0393258	10	CTNNB1/CCT3/CCT7/CCT4/TCP1/CCT6A/HNRNPA1/CCT2/CCT8/CCT5
GO:0010823	negative regulation of mitochondrion organization	10/1382	54/17913	0.00758903	0.0432536	10	CLU/LMNA/BAG3/BNIP3/IGF1/HSPA1A/LMAN1/ACAA2/PRELID1/SLC25A5
GO:0070206	protein trimerization	10/1382	54/17913	0.00758903	0.0432536	10	COL1A1/COL1A2/COL6A2/COL6A1/EMILIN1/C1QTNF1/SCARA5/MIF/STEAP4/ATXN10
GO:0070830	bicellular tight junction assembly	10/1382	54/17913	0.00758903	0.0432536	10	GJA1/TJP1/SNAI2/PARD3/MYO1C/SNAI1/AFDN/RAB13/ROCK2/ARL2
GO:0071385	cellular response to glucocorticoid stimulus	10/1382	54/17913	0.00758903	0.0432536	10	SERPINF1/ERRFI1/EGFR/KLF9/FBXO32/ZFP36L1/GSTP1/ZFP36/DDIT4/EIF4EBP1
GO:0010332	response to gamma radiation	10/1382	55/17913	0.00865039	0.0481665	10	CRYAB/YAP1/EGR1/MAP3K20/MYC/CDKN1A/TMEM109/GTF2H5/RPL26/HSPA5
GO:0120192	tight junction assembly	10/1382	55/17913	0.00865039	0.0481665	10	GJA1/TJP1/SNAI2/PARD3/MYO1C/SNAI1/AFDN/RAB13/ROCK2/ARL2
GO:0006879	cellular iron ion homeostasis	10/1382	57/17913	0.0111105	0.0579184	10	CP/TF/CYBRD1/SCARA5/SOD1/MYC/NDFIP1/SKP1/SRI/NEDD8
GO:0032507	maintenance of protein location in cell	10/1382	57/17913	0.0111105	0.0579184	10	CAV1/SCIN/GSN/ARL2/SUN1/PARK7/FLNB/SKP1/OS9/HSPA5
GO:0010662	regulation of striated muscle cell apoptotic process	10/1382	59/17913	0.0140667	0.0692373	10	NUPR1/MDK/AGT/HEY2/HSPB6/BAG3/BNIP3/CAMK2D/ILK/CAPN2
GO:0034394	protein localization to cell surface	10/1382	59/17913	0.0140667	0.0692373	10	EMP2/FGF7/ANGPT1/ANK2/MAP1A/GPM6B/LEPROT/HSP90AB1/CTNNB1/FLNA
GO:0120193	tight junction organization	10/1382	59/17913	0.0140667	0.0692373	10	GJA1/TJP1/SNAI2/PARD3/MYO1C/SNAI1/AFDN/RAB13/ROCK2/ARL2
GO:0021885	forebrain cell migration	10/1382	60/17913	0.0157482	0.0748566	10	CXCL12/NRP2/AXL/SLIT2/NRP1/LAMB1/EGFR/DIXDC1/SUN1/CTNNB1
GO:0043388	positive regulation of DNA binding	10/1382	61/17913	0.0175744	0.0815202	10	FOXC1/HES1/TWIST1/KLF4/IGF1/PARK7/CTNNB1/EDF1/CALM2/NME1
GO:1904356	regulation of telomere maintenance via telomere lengthening	10/1382	61/17913	0.0175744	0.0815202	10	CTNNB1/CCT3/CCT7/CCT4/TCP1/CCT6A/HNRNPA1/CCT2/CCT8/CCT5
GO:0006360	transcription by RNA polymerase I	10/1382	62/17913	0.0195521	0.0876217	10	CAVIN1/POLR2F/GTF2H5/POLR2H/POLR2E/NOP53/NCL/FLNA/POLR2L/POLR2K
GO:0010658	striated muscle cell apoptotic process	10/1382	62/17913	0.0195521	0.0876217	10	NUPR1/MDK/AGT/HEY2/HSPB6/BAG3/BNIP3/CAMK2D/ILK/CAPN2
GO:0019748	secondary metabolic process	10/1382	63/17913	0.0216877	0.0948966	10	CYP1B1/FMO2/AKR1C1/BDH2/AKR1C2/PAM/ARL1/AKR1C3/AKR1A1/PGAM1
GO:0021872	forebrain generation of neurons	10/1382	63/17913	0.0216877	0.0948966	10	FGFR1/HES1/DLX5/NRP2/SLIT2/SATB2/NRP1/UBB/UQCRQ/INHBA
GO:0045670	regulation of osteoclast differentiation	10/1382	64/17913	0.0239878	0.101913	10	BGLAP/FBN1/SFRP1/CSF1/MAFB/TOB2/CTNNB1/GNAS/KLF10/FOS
GO:0045428	regulation of nitric oxide biosynthetic process	10/1382	65/17913	0.0264585	0.109479	10	CLU/CAV1/AGT/PTGIS/DDAH2/KLF4/ROCK2/HSP90AB1/HSP90AA1/KLF2
GO:1903051	negative regulation of proteolysis involved in cellular protein catabolic process	10/1382	67/17913	0.0319356	0.12622	10	MAP1A/HSP90AB1/RPL5/PARK7/ERLEC1/CAMLG/RPL11/OS9/NOP53/UBXN1
GO:0009060	aerobic respiration	10/1382	68/17913	0.0349531	0.134418	10	BNIP3/COX6C/SDHD/NDUFA4/MDH2/NOP53/COX6A1/ATP5F1D/COX7C/IDH3G
GO:0060038	cardiac muscle cell proliferation	10/1382	68/17913	0.0349531	0.134418	10	FOXC1/FGFR1/GJA1/FOXC2/RBP4/YAP1/TBX2/HEY2/SAV1/MEF2C
GO:0019674	NAD metabolic process	10/1382	71/17913	0.0451817	0.160124	10	NNMT/NT5E/PTGIS/TPI1/MDH1/MDH2/PKM/PFKP/PGAM1/ENO1
GO:0033555	multicellular organismal response to stress	10/1382	71/17913	0.0451817	0.160124	10	APOE/MDK/GJA1/VWA1/THBS1/COMT/MEF2C/CAPN2/VDAC1/VDAC3
GO:1903036	positive regulation of response to wounding	10/1382	71/17913	0.0451817	0.160124	10	LRP1/PTN/PLPP3/MDK/FOXC2/SMOC2/PDPN/MYLK/THBS1/PRDX2
GO:0006695	cholesterol biosynthetic process	10/1382	72/17913	0.0489981	0.167918	10	APOE/CYB5R3/SOD1/CES1/INSIG2/ACAA2/RAN/MBTPS1/CNBP/FDPS
GO:1902653	secondary alcohol biosynthetic process	10/1382	72/17913	0.0489981	0.167918	10	APOE/CYB5R3/SOD1/CES1/INSIG2/ACAA2/RAN/MBTPS1/CNBP/FDPS
GO:0016126	sterol biosynthetic process	10/1382	75/17913	0.0617183	0.193864	10	APOE/CYB5R3/SOD1/CES1/INSIG2/ACAA2/RAN/MBTPS1/CNBP/FDPS
GO:0010771	negative regulation of cell morphogenesis involved in differentiation	10/1382	78/17913	0.0763987	0.225179	10	FBLN1/ID1/THY1/SLIT2/NRP1/NGFR/EFNA5/PTK2/SPP1/RYK
GO:0033143	regulation of intracellular steroid hormone receptor signaling pathway	10/1382	78/17913	0.0763987	0.225179	10	SFRP1/YAP1/KANK2/DAB2/PARK7/CALR/RWDD1/PHB/PHB2/LBH
GO:1903008	organelle disassembly	10/1382	78/17913	0.0763987	0.225179	10	CTSK/CTTN/RETREG1/BNIP3/PARK7/FIS1/VDAC1/OPTN/SQSTM1/TOMM7
GO:0032642	regulation of chemokine production	10/1382	79/17913	0.0817355	0.237679	10	APOD/LRP1/LPL/TWIST1/SNAI2/EGR1/APP/KLF4/GSTP1/MIF
GO:0043536	positive regulation of blood vessel endothelial cell migration	10/1382	80/17913	0.0872951	0.246592	10	FGFR1/FOXC2/ANGPT1/NRP1/HSPB1/AMOTL1/THBS1/AKT3/VEGFA/ATP5F1B
GO:0050886	endocrine process	10/1382	80/17913	0.0872951	0.246592	10	SELENOM/FGFR1/C1QTNF1/AGT/ENPEP/FOXD1/PCSK5/CES1/GNAS/INHBA
GO:0032651	regulation of interleukin-1 beta production	10/1382	82/17913	0.099082	0.270565	10	LPL/ERRFI1/HSPB1/EGR1/S1PR3/APP/IGF1/GSTP1/SPHK1/IFI16
GO:0042058	regulation of epidermal growth factor receptor signaling pathway	10/1382	84/17913	0.111754	0.29238	10	ERRFI1/AGT/EGFR/GPRC5A/ITGA1/APP/SPRY1/SHC1/MVB12A/IFI6
GO:0090559	regulation of membrane permeability	10/1382	84/17913	0.111754	0.29238	10	BNIP3/LAPTM4B/YWHAE/BAD/YWHAQ/HSPA1A/CHCHD10/ACAA2/ALKBH7/SLC25A5
GO:0045844	positive regulation of striated muscle tissue development	10/1382	85/17913	0.118418	0.306639	10	FGFR1/GJA1/YAP1/TBX2/HEY2/SHOX2/GPC1/IGF1/MEF2C/CTNNB1
GO:0048636	positive regulation of muscle organ development	10/1382	85/17913	0.118418	0.306639	10	FGFR1/GJA1/YAP1/TBX2/HEY2/SHOX2/GPC1/IGF1/MEF2C/CTNNB1
GO:0032602	chemokine production	10/1382	86/17913	0.125297	0.316201	10	APOD/LRP1/LPL/TWIST1/SNAI2/EGR1/APP/KLF4/GSTP1/MIF
GO:0061097	regulation of protein tyrosine kinase activity	10/1382	86/17913	0.125297	0.316201	10	GAS6/CAV1/THY1/ERRFI1/NTRK2/AGT/GPRC5A/APP/SHC1/RACK1
GO:1901863	positive regulation of muscle tissue development	10/1382	86/17913	0.125297	0.316201	10	FGFR1/GJA1/YAP1/TBX2/HEY2/SHOX2/GPC1/IGF1/MEF2C/CTNNB1
GO:0009791	post-embryonic development	10/1382	88/17913	0.139691	0.342266	10	SELENOP/FBN1/EFEMP1/NDN/C12orf57/KLF4/ARID5B/GNAS/ERCC1/VEGFA
GO:1901184	regulation of ERBB signaling pathway	10/1382	91/17913	0.162813	0.383045	10	ERRFI1/AGT/EGFR/GPRC5A/ITGA1/APP/SPRY1/SHC1/MVB12A/IFI6
GO:0036473	cell death in response to oxidative stress	10/1382	92/17913	0.170912	0.396472	10	CYP1B1/HSPB1/PAWR/SOD1/PARK7/CTNNB1/RACK1/STK25/ARL6IP5/P4HB
GO:0032611	interleukin-1 beta production	10/1382	93/17913	0.179197	0.39816	10	LPL/ERRFI1/HSPB1/EGR1/S1PR3/APP/IGF1/GSTP1/SPHK1/IFI16
GO:0001676	long-chain fatty acid metabolic process	10/1382	94/17913	0.187664	0.413174	10	CYP1B1/PTGDS/PTGIS/PAM/MGLL/GPX4/AKR1C3/CBR1/GSTP1/PTGES3
GO:0031109	microtubule polymerization or depolymerization	10/1382	94/17913	0.187664	0.413174	10	CRYAB/MAP1B/CAMSAP2/HSPA1B/MAP7D3/ARL2/HSPA1A/FKBP4/RPS3/AKAP9
GO:0048640	negative regulation of developmental growth	10/1382	94/17913	0.187664	0.413174	10	GJA1/SFRP1/RBP4/NRP1/FGFR3/PTK2/SAV1/SPP1/RYK/CDKN1A
GO:0097711	ciliary basal body-plasma membrane docking	10/1382	95/17913	0.196307	0.425676	10	AHI1/DYNLL1/YWHAE/DYNC1I2/TUBB/DCTN2/TUBA1A/HSP90AA1/TUBB4B/AKAP9
GO:0021549	cerebellum development	10/1382	98/17913	0.223224	0.455716	10	SERPINE2/FOXC1/PTN/MDK/CKB/SSTR2/MYH10/SDF4/UQCRQ/HSPA5
GO:0001824	blastocyst development	10/1382	99/17913	0.232504	0.466799	10	TM4SF1/DAD1/IGF1/SBDS/PSMC3/CAPN2/JUNB/RPL7L1/SF3B6/PSMC4
GO:0008593	regulation of Notch signaling pathway	10/1382	99/17913	0.232504	0.466799	10	HES1/NOTCH3/MMP14/HEY2/EGFR/JAG1/IL6ST/EPN2/MAML2/ERH
GO:0002042	cell migration involved in sprouting angiogenesis	10/1382	101/17913	0.251482	0.487949	10	FOXC2/SLIT2/NRP1/SPRED1/ITGB1/THBS1/KLF4/AKT3/NR4A1/VEGFA
GO:0002367	cytokine production involved in immune response	10/1382	101/17913	0.251482	0.487949	10	GAS6/ANGPT1/IL1R1/CD81/KDELR1/MIF/CUEDC2/SMAD7/HSPD1/DDX1
GO:0006354	DNA-templated transcription, elongation	10/1382	106/17913	0.301006	0.542075	10	TCEA2/POLR2F/GTF2H5/POLR2H/POLR2E/POLR2I/ELOC/POLR2L/POLR2K/HTATSF1
GO:0022037	metencephalon development	10/1382	107/17913	0.311204	0.553749	10	SERPINE2/FOXC1/PTN/MDK/CKB/SSTR2/MYH10/SDF4/UQCRQ/HSPA5
GO:0071156	regulation of cell cycle arrest	10/1382	108/17913	0.32148	0.563562	10	CCND1/FAP/SOX4/HSP90AB1/CDKN1A/MIF/CALR/PRMT1/RPL26/GADD45A
GO:0042035	regulation of cytokine biosynthetic process	10/1382	110/17913	0.342235	0.587339	10	ERRFI1/CD276/AKAP12/HSPB1/EGR1/APP/THBS1/KLF4/INHBA/ZFP36
GO:1903578	regulation of ATP metabolic process	10/1382	110/17913	0.342235	0.587339	10	NUPR1/ZBTB20/IGF1/PARK7/DNAJC15/ISCU/EIF6/PGAM1/DDIT4/ENO1
GO:0010508	positive regulation of autophagy	10/1382	113/17913	0.373752	0.618874	10	DCN/BAG3/BNIP3/BAD/PARK7/TMEM59/TRIM8/SCOC/OPTN/TOMM7
GO:0072329	monocarboxylic acid catabolic process	10/1382	115/17913	0.394924	0.64057	10	TWIST1/BDH2/ACADVL/ECH1/ETFB/HADHB/ACAA2/ECHS1/AKR1A1/HADHA
GO:0002698	negative regulation of immune effector process	10/1382	116/17913	0.405534	0.653255	10	HTRA1/SERPING1/A2M/ANGPT1/CD59/LGALS3/CUEDC2/SMAD7/RPS19/C1QBP
GO:0030449	regulation of complement activation	10/1382	116/17913	0.405534	0.653255	10	CLU/CFH/SERPING1/C1R/C1S/A2M/CD81/CD59/PHB/C1QBP
GO:1902850	microtubule cytoskeleton organization involved in mitosis	10/1382	116/17913	0.405534	0.653255	10	CEP126/HSPA1B/PKD1/MAP4/SPRY1/SBDS/HSPA1A/CHMP5/RAN/FLNA
GO:2000257	regulation of protein activation cascade	10/1382	117/17913	0.41615	0.660916	10	CLU/CFH/SERPING1/C1R/C1S/A2M/CD81/CD59/PHB/C1QBP
GO:0006997	nucleus organization	10/1382	118/17913	0.426764	0.675456	10	LMNA/GOLM1/NFE2L1/NECTIN2/REEP3/SUN1/CHMP5/BANF1/RPS19/SERBP1
GO:0046330	positive regulation of JNK cascade	10/1382	124/17913	0.489994	0.737513	10	FZD8/SASH1/LTBR/APP/GADD45B/HACD3/MAP3K20/MDFIC/RPS3/GADD45A
GO:0046467	membrane lipid biosynthetic process	10/1382	127/17913	0.52101	0.768583	10	PLPP3/A4GALT/PLPP1/KDSR/TNFRSF1A/SPHK1/RACK1/DPM3/PIGP/PYURF
GO:0007156	homophilic cell adhesion via plasma membrane adhesion molecules	10/1382	130/17913	0.551403	0.780615	10	PCDH18/FAT1/FAT3/CADM1/ITGB1/PKD1/PLXNB2/NECTIN2/PCDH9/CLSTN1
GO:0055088	lipid homeostasis	10/1382	132/17913	0.571246	0.799398	10	APOE/ANGPTL4/CAV1/LPL/RCN3/AKR1C1/RBP1/LIMA1/NFE2L1/ZBTB20
GO:0000077	DNA damage checkpoint	10/1382	133/17913	0.581027	0.801565	10	CCND1/SOX4/MAP3K20/CDKN1A/PRMT1/RPS27L/PEA15/NOP53/RPL26/GADD45A
GO:0002920	regulation of humoral immune response	10/1382	135/17913	0.600286	0.814331	10	CLU/CFH/SERPING1/C1R/C1S/A2M/CD81/CD59/PHB/C1QBP
GO:0060968	regulation of gene silencing	10/1382	139/17913	0.637481	0.827802	10	WTIP/EGFR/POLR2F/POLR2H/POLR2E/POLR2I/MPHOSPH8/POLR2L/POLR2K/ZFP36
GO:0071804	cellular potassium ion transport	10/1382	140/17913	0.646485	0.827802	10	CAV1/FHL1/KCNMA1/ANK2/CD63/SLC1A3/YWHAE/ATP1A1/FLNA/AKAP9
GO:0071805	potassium ion transmembrane transport	10/1382	140/17913	0.646485	0.827802	10	CAV1/FHL1/KCNMA1/ANK2/CD63/SLC1A3/YWHAE/ATP1A1/FLNA/AKAP9
GO:0031570	DNA integrity checkpoint	10/1382	141/17913	0.655364	0.833377	10	CCND1/SOX4/MAP3K20/CDKN1A/PRMT1/RPS27L/PEA15/NOP53/RPL26/GADD45A
GO:0008277	regulation of G protein-coupled receptor signaling pathway	10/1382	148/17913	0.713849	0.86618	10	RGS5/RGS3/CAV2/RAMP1/TULP3/RGS16/ROCK2/MGLL/PHB/METAP2
GO:0007269	neurotransmitter secretion	10/1382	149/17913	0.72166	0.86618	10	PFN2/PPFIA2/NRXN2/SNCG/BACE1/STXBP1/MEF2C/PNKD/ATP2A2/HSPA8
GO:0099643	signal release from synapse	10/1382	150/17913	0.72933	0.871963	10	PFN2/PPFIA2/NRXN2/SNCG/BACE1/STXBP1/MEF2C/PNKD/ATP2A2/HSPA8
GO:0006338	chromatin remodeling	10/1382	156/17913	0.772383	0.897748	10	SATB2/SOX9/SMARCA1/SMARCD3/MYC/NPM1/CTNNB1/PTMA/CENPX/NUDT5
GO:0007188	adenylate cyclase-modulating G protein-coupled receptor signaling pathway	10/1382	162/17913	0.810351	0.917278	10	PTH1R/PLN/SSTR2/EDNRA/RAMP1/AKAP12/S1PR3/ADCY3/GNAS/FLNA
GO:1902275	regulation of chromatin organization	10/1382	165/17913	0.827466	0.926425	10	LMNA/TWIST1/SNAI2/EID1/CAMK2D/SETD7/CTNNB1/MPHOSPH8/VEGFA/SET
GO:0099003	vesicle-mediated transport in synapse	10/1382	174/17913	0.871737	0.948531	10	PFN2/MAPK10/BACE1/EEA1/STXBP1/CTNNB1/TMEM230/CLSTN1/ATP2A2/ACTG1
GO:0050707	regulation of cytokine secretion	10/1382	201/17913	0.952509	0.98273	10	FN1/LRP1/GAS6/MDK/LPL/TWIST1/ANGPT1/AKAP12/CADM1/MIF
GO:1903531	negative regulation of secretion by cell	10/1382	202/17913	0.95435	0.983919	10	FN1/APOE/GAS6/SFRP1/ANGPT1/TNFRSF1A/PNKD/NDUFAF2/INHBA/JAGN1
GO:0043543	protein acylation	10/1382	233/17913	0.987664	0.998445	10	NUPR1/TWIST1/SNAI2/SOX4/EID1/ZDHHC14/PARK7/SPHK1/MDH2/SET
GO:1990173	protein localization to nucleoplasm	9/1382	12/17913	1.67845e-08	8.79919e-07	9	CCT3/CCT7/NOP53/CCT4/TCP1/CCT6A/CCT2/CCT8/CCT5
GO:1904874	positive regulation of telomerase RNA localization to Cajal body	9/1382	15/17913	3.08311e-07	1.09126e-05	9	CCT3/CCT7/NHP2/CCT4/TCP1/CCT6A/CCT2/CCT8/CCT5
GO:1904872	regulation of telomerase RNA localization to Cajal body	9/1382	18/17913	2.41943e-06	6.24505e-05	9	CCT3/CCT7/NHP2/CCT4/TCP1/CCT6A/CCT2/CCT8/CCT5
GO:0090670	RNA localization to Cajal body	9/1382	19/17913	4.28174e-06	0.000101682	9	CCT3/CCT7/NHP2/CCT4/TCP1/CCT6A/CCT2/CCT8/CCT5
GO:0090671	telomerase RNA localization to Cajal body	9/1382	19/17913	4.28174e-06	0.000101682	9	CCT3/CCT7/NHP2/CCT4/TCP1/CCT6A/CCT2/CCT8/CCT5
GO:0090672	telomerase RNA localization	9/1382	19/17913	4.28174e-06	0.000101682	9	CCT3/CCT7/NHP2/CCT4/TCP1/CCT6A/CCT2/CCT8/CCT5
GO:0090685	RNA localization to nucleus	9/1382	19/17913	4.28174e-06	0.000101682	9	CCT3/CCT7/NHP2/CCT4/TCP1/CCT6A/CCT2/CCT8/CCT5
GO:0002053	positive regulation of mesenchymal cell proliferation	9/1382	26/17913	8.82331e-05	0.00122885	9	FGFR1/PRRX1/SOX9/PDGFA/SIX1/SHOX2/MYC/CTNNB1/VEGFA
GO:0042255	ribosome assembly	9/1382	26/17913	8.82331e-05	0.00122885	9	RPL5/SBDS/NPM1/RPL11/EIF6/NOP53/RPS19/C1QBP/EIF2A
GO:0006929	substrate-dependent cell migration	9/1382	29/17913	0.00022891	0.00272908	9	FN1/NRP2/SLIT2/CTTN/NRP1/SNAI2/TNFRSF12A/MYH10/ATP5F1B
GO:0071480	cellular response to gamma radiation	9/1382	29/17913	0.00022891	0.00272908	9	CRYAB/YAP1/EGR1/MAP3K20/CDKN1A/TMEM109/GTF2H5/RPL26/HSPA5
GO:0001569	branching involved in blood vessel morphogenesis	9/1382	30/17913	0.000304798	0.00348511	9	MDK/FOXC2/COL4A1/NRP1/EDNRA/ENG/CTNNB1/PLXND1/VEGFA
GO:0060325	face morphogenesis	9/1382	30/17913	0.000304798	0.00348511	9	COL1A1/MMP2/PDGFRA/DLX5/RRAS/CRISPLD1/ASPH/CRISPLD2/ARID5B
GO:0090075	relaxation of muscle	9/1382	30/17913	0.000304798	0.00348511	9	PLN/PRKG1/PDE5A/SOD1/CAMK2D/GUCY1A1/SRI/ATP2A2/ATP1A1
GO:0046688	response to copper ion	9/1382	32/17913	0.00051922	0.0051708	9	S100A13/SOD3/PAM/BACE1/APP/NFE2L1/SOD1/PARK7/ATP5F1D
GO:0010837	regulation of keratinocyte proliferation	9/1382	33/17913	0.000665559	0.0064099	9	FGF7/MDK/SNAI2/YAP1/INTU/KLF9/CD109/ZFP36L1/ZFP36
GO:0043516	regulation of DNA damage response, signal transduction by p53 class mediator	9/1382	33/17913	0.000665559	0.0064099	9	TWIST1/SNAI2/PLA2R1/SPRED1/SNAI1/PTTG1IP/HIC1/MIF/RPL26
GO:1901890	positive regulation of cell junction assembly	9/1382	33/17913	0.000665559	0.0064099	9	CAV1/THY1/SFRP1/AGT/NRP1/COL16A1/SDC4/S100A10/VEGFA
GO:0021955	central nervous system neuron axonogenesis	9/1382	34/17913	0.000843894	0.00773384	9	CDH11/SLIT2/NFIB/DCLK1/PTK2/C12orf57/HSP90AB1/ADARB1/HSP90AA1
GO:0060428	lung epithelium development	9/1382	34/17913	0.000843894	0.00773384	9	FGF7/ERRFI1/RCN3/NFIB/YAP1/SOX9/SAV1/PKD1/KLF2
GO:0060323	head morphogenesis	9/1382	35/17913	0.00105919	0.00934506	9	COL1A1/MMP2/PDGFRA/DLX5/RRAS/CRISPLD1/ASPH/CRISPLD2/ARID5B
GO:0051973	positive regulation of telomerase activity	9/1382	36/17913	0.00131685	0.0111551	9	KLF4/HSP90AB1/MYC/CTNNB1/PTGES3/HSP90AA1/CCT4/TCP1/CCT2
GO:1905521	regulation of macrophage migration	9/1382	36/17913	0.00131685	0.0111551	9	RARRES2/MDK/EMILIN1/MMP14/CSF1/CD9/CD81/THBS1/MIF
GO:0014912	negative regulation of smooth muscle cell migration	9/1382	37/17913	0.00162268	0.0129783	9	IGFBP5/TPM1/LRP1/SLIT2/PRKG1/IGFBP3/ILK/GSTP1/MEF2C
GO:0035329	hippo signaling	9/1382	38/17913	0.0019829	0.0153468	9	WWTR1/TJP1/YAP1/AMOTL2/WTIP/TEAD1/AMOTL1/SAV1/YWHAE
GO:0030204	chondroitin sulfate metabolic process	9/1382	39/17913	0.00240414	0.0178131	9	DCN/BGN/NDNF/CSPG4/DSEL/CHST3/UGDH/VCAN/HEXB
GO:0031952	regulation of protein autophosphorylation	9/1382	40/17913	0.00289338	0.0206665	9	CAV1/ERRFI1/ENPP1/PDGFA/GPNMB/ENG/JUN/CALM2/VEGFA
GO:0033574	response to testosterone	9/1382	40/17913	0.00289338	0.0206665	9	BGLAP/PLN/THBS1/ROCK2/SPP1/BAD/CALR/RWDD1/NME1
GO:0006692	prostanoid metabolic process	9/1382	41/17913	0.00345795	0.023841	9	PTGDS/AKR1C2/PTGR1/PTGIS/TNFRSF1A/AKR1C3/CBR1/MIF/PTGES3
GO:0006693	prostaglandin metabolic process	9/1382	41/17913	0.00345795	0.023841	9	PTGDS/AKR1C2/PTGR1/PTGIS/TNFRSF1A/AKR1C3/CBR1/MIF/PTGES3
GO:0045773	positive regulation of axon extension	9/1382	41/17913	0.00345795	0.023841	9	FN1/CXCL12/LRP1/MAP1B/NRP1/TNFRSF12A/BMPR2/ILK/VEGFA
GO:0050434	positive regulation of viral transcription	9/1382	41/17913	0.00345795	0.023841	9	JUN/NUCKS1/POLR2F/POLR2H/POLR2E/MDFIC/POLR2I/POLR2L/POLR2K
GO:0072210	metanephric nephron development	9/1382	41/17913	0.00345795	0.023841	9	PDGFRB/PDGFRA/HES1/LAMB2/SOX9/FOXD1/EGR1/PKD1/CTNNB1
GO:0090317	negative regulation of intracellular protein transport	9/1382	41/17913	0.00345795	0.023841	9	APOD/ANGPT1/BAG3/PKIG/PARK7/LMAN1/ERLEC1/OS9/MDFIC
GO:0010863	positive regulation of phospholipase C activity	9/1382	42/17913	0.00410549	0.0273391	9	FGFR1/PDGFRB/PDGFRA/NTRK2/AGT/EDNRA/EGFR/ANG/ABL2
GO:0050654	chondroitin sulfate proteoglycan metabolic process	9/1382	42/17913	0.00410549	0.0273391	9	DCN/BGN/NDNF/CSPG4/DSEL/CHST3/UGDH/VCAN/HEXB
GO:0086004	regulation of cardiac muscle cell contraction	9/1382	42/17913	0.00410549	0.0273391	9	CAV1/PLN/ANK2/CAMK2D/SRI/ATP2A2/ATP1A1/FLNA/AKAP9
GO:0021762	substantia nigra development	9/1382	43/17913	0.00484395	0.03094	9	S100A1/CKB/NDRG2/DYNLL1/YWHAE/YWHAQ/ATP5PF/CALM2/HSPA5
GO:0043616	keratinocyte proliferation	9/1382	43/17913	0.00484395	0.03094	9	FGF7/MDK/SNAI2/YAP1/INTU/KLF9/CD109/ZFP36L1/ZFP36
GO:0030850	prostate gland development	9/1382	44/17913	0.00568148	0.0347709	9	SERPINF1/TNC/ID4/SFRP1/SULF1/SOX9/CRIP1/CTNNB1/FKBP4
GO:1900274	regulation of phospholipase C activity	9/1382	44/17913	0.00568148	0.0347709	9	FGFR1/PDGFRB/PDGFRA/NTRK2/AGT/EDNRA/EGFR/ANG/ABL2
GO:1903573	negative regulation of response to endoplasmic reticulum stress	9/1382	44/17913	0.00568148	0.0347709	9	CLU/PARK7/HSPA1A/ERLEC1/RACK1/OS9/HSPA5/PPP1R15A/UBXN1
GO:0030834	regulation of actin filament depolymerization	9/1382	45/17913	0.00662649	0.0393258	9	DSTN/EPS8/PLEKHH2/LMOD1/SCIN/LIMA1/GSN/CFL2/RDX
GO:0046850	regulation of bone remodeling	9/1382	45/17913	0.00662649	0.0393258	9	LEPR/BGLAP/MDK/GJA1/SFRP1/PDK4/TMEM119/TNFRSF11B/EGFR
GO:0050922	negative regulation of chemotaxis	9/1382	45/17913	0.00662649	0.0393258	9	NBL1/SLIT2/NRP1/THBS1/CCL2/RYK/GSTP1/MIF/ANGPT2
GO:0032330	regulation of chondrocyte differentiation	9/1382	46/17913	0.0076875	0.0435913	9	MDK/EFEMP1/SNAI2/SOX9/SCIN/SHOX2/RUNX2/TRPS1/CTNNB1
GO:0090199	regulation of release of cytochrome c from mitochondria	9/1382	46/17913	0.0076875	0.0435913	9	CLU/LMNA/BNIP3/BAD/IGF1/PDCD5/FAM162A/CHCHD10/PRELID1
GO:0014911	positive regulation of smooth muscle cell migration	9/1382	47/17913	0.00887318	0.0488685	9	IGFBP5/LRP1/PDGFRB/MDK/ADAMTS1/AGT/NRP1/PDGFD/IGF1
GO:0061383	trabecula morphogenesis	9/1382	47/17913	0.00887318	0.0488685	9	COL1A1/MMP2/ADAMTS1/CHAD/SFRP1/BMP5/RBP4/HEY2/ENG
GO:0002686	negative regulation of leukocyte migration	9/1382	48/17913	0.0101923	0.0546176	9	CXCL12/APOD/NBL1/EMILIN1/BMP5/SLIT2/CCL2/WASL/MIF
GO:0030042	actin filament depolymerization	9/1382	48/17913	0.0101923	0.0546176	9	DSTN/EPS8/PLEKHH2/LMOD1/SCIN/LIMA1/GSN/CFL2/RDX
GO:0051972	regulation of telomerase activity	9/1382	48/17913	0.0101923	0.0546176	9	KLF4/HSP90AB1/MYC/CTNNB1/PTGES3/HSP90AA1/CCT4/TCP1/CCT2
GO:0035036	sperm-egg recognition	9/1382	49/17913	0.0116535	0.0599617	9	CD9/CCT3/VDAC2/CCT7/CCT4/TCP1/CCT2/CCT8/CCT5
GO:0060395	SMAD protein signal transduction	9/1382	49/17913	0.0116535	0.0599617	9	WWTR1/RBPMS/DAB2/VIM/SMAD5/JUN/TOB1/FAM89B/FOS
GO:0021879	forebrain neuron differentiation	9/1382	52/17913	0.0169772	0.0790799	9	HES1/DLX5/NRP2/SLIT2/SATB2/NRP1/UBB/UQCRQ/INHBA
GO:1901799	negative regulation of proteasomal protein catabolic process	9/1382	52/17913	0.0169772	0.0790799	9	MAP1A/HSP90AB1/PARK7/ERLEC1/CAMLG/RPL11/OS9/NOP53/UBXN1
GO:0001541	ovarian follicle development	9/1382	54/17913	0.0213944	0.093983	9	FOXC1/MMP14/KITLG/ANG/SOD1/CTNNA1/PHB/VEGFA/INHBA
GO:0061005	cell differentiation involved in kidney development	9/1382	54/17913	0.0213944	0.093983	9	ACTA2/HES1/FOXC2/LAMB2/WWTR1/YAP1/JAG1/MEF2C/CTNNB1
GO:0097755	positive regulation of blood vessel diameter	9/1382	54/17913	0.0213944	0.093983	9	APOE/GJA1/AGT/PRKG1/EGFR/ITGA1/SOD1/BMPR2/GUCY1A1
GO:0000422	autophagy of mitochondrion	9/1382	55/17913	0.0238877	0.101913	9	CTSK/CTTN/BNIP3/PARK7/FIS1/VDAC1/OPTN/SQSTM1/TOMM7
GO:0035306	positive regulation of dephosphorylation	9/1382	55/17913	0.0238877	0.101913	9	PDGFRB/DLC1/NPNT/ITGA1/HSP90AB1/MEF2C/CAMTA1/CALM2/PPP1R15A
GO:0061726	mitochondrion disassembly	9/1382	55/17913	0.0238877	0.101913	9	CTSK/CTTN/BNIP3/PARK7/FIS1/VDAC1/OPTN/SQSTM1/TOMM7
GO:0033619	membrane protein proteolysis	9/1382	56/17913	0.0265812	0.109823	9	APOE/TIMP1/TIMP3/NGFR/SH3D19/BACE1/SPPL2A/SNX9/MBTPS1
GO:0071398	cellular response to fatty acid	9/1382	56/17913	0.0265812	0.109823	9	ID3/TNC/LPL/SFRP1/PDK4/AKR1C2/PTGFR/AKR1C3/NME1
GO:0010665	regulation of cardiac muscle cell apoptotic process	9/1382	57/17913	0.029482	0.118891	9	NUPR1/MDK/AGT/HEY2/HSPB6/BNIP3/CAMK2D/ILK/CAPN2
GO:0022029	telencephalon cell migration	9/1382	57/17913	0.029482	0.118891	9	CXCL12/NRP2/SLIT2/NRP1/LAMB1/EGFR/DIXDC1/SUN1/CTNNB1
GO:0032370	positive regulation of lipid transport	9/1382	58/17913	0.0325969	0.128263	9	APOE/LRP1/C1QTNF1/PLA2R1/ANXA2/PLTP/SPP1/MIF/PRELID1
GO:0042490	mechanoreceptor differentiation	9/1382	58/17913	0.0325969	0.128263	9	FGFR1/HES1/NTRK2/HEY2/JAG1/SDC4/SOD1/CTHRC1/TRIP11
GO:1904589	regulation of protein import	9/1382	58/17913	0.0325969	0.128263	9	APOD/ANGPT1/BAG3/PKIG/PDCD5/RAN/MDFIC/HSPA8/FLNA
GO:0032272	negative regulation of protein polymerization	9/1382	59/17913	0.0359323	0.136251	9	EPS8/SLIT2/PFN2/LMOD1/SCIN/GSN/RDX/VDAC2/FKBP4
GO:0045123	cellular extravasation	9/1382	59/17913	0.0359323	0.136251	9	CXCL12/VCAM1/THY1/MDK/IL1R1/ITGA1/ITGB1/CCL2/PDGFD
GO:1903902	positive regulation of viral life cycle	9/1382	59/17913	0.0359323	0.136251	9	LGALS1/CAV2/HACD3/NUCKS1/PPIB/ADARB1/PPIA/HSPA8/P4HB
GO:0010659	cardiac muscle cell apoptotic process	9/1382	60/17913	0.0394942	0.144388	9	NUPR1/MDK/AGT/HEY2/HSPB6/BNIP3/CAMK2D/ILK/CAPN2
GO:0008088	axo-dendritic transport	9/1382	61/17913	0.043288	0.156304	9	DST/TMEM108/MAP1A/HSPB1/FEZ1/APP/SOD1/PURA/KIF1C
GO:0010803	regulation of tumor necrosis factor-mediated signaling pathway	9/1382	61/17913	0.043288	0.156304	9	GAS6/CCDC3/HSPA1B/TNFRSF1A/GSTP1/HSPA1A/SPPL2A/SPHK1/RACK1
GO:0033627	cell adhesion mediated by integrin	9/1382	61/17913	0.043288	0.156304	9	CYP1B1/FBN1/FOXC2/SNAI2/COL16A1/NPNT/PTK2/ITGB1/ITGAV
GO:1904377	positive regulation of protein localization to cell periphery	9/1382	61/17913	0.043288	0.156304	9	LRP1/EPB41L2/EPHA3/EGFR/ITGB1/LGALS3/RER1/RACK1/SQSTM1
GO:0035914	skeletal muscle cell differentiation	9/1382	63/17913	0.0515904	0.17481	9	NUPR1/SIX1/GPC1/EGR1/S100B/ATF3/MEF2C/EEF2/FOS
GO:0036498	IRE1-mediated unfolded protein response	9/1382	63/17913	0.0515904	0.17481	9	LMNA/KDELR3/ACADVL/MYDGF/YIF1A/SHC1/SEC31A/PDIA6/HSPA5
GO:0019915	lipid storage	9/1382	64/17913	0.0561072	0.18362	9	APOE/CAV1/LPL/ENPP1/HILPDA/ITGAV/ALKBH7/HEXB/PLIN2
GO:0032768	regulation of monooxygenase activity	9/1382	64/17913	0.0561072	0.18362	9	APOE/CAV1/S100A1/CYGB/EGFR/DDAH2/WASL/PARK7/HSP90AA1
GO:0003143	embryonic heart tube morphogenesis	9/1382	65/17913	0.0608721	0.192187	9	HES1/GJA1/YAP1/TBX2/ENG/AHI1/IFT57/MEF2C/TMED2
GO:0014823	response to activity	9/1382	65/17913	0.0608721	0.192187	9	BGLAP/PTN/AGT/TNS2/COL4A2/FIS1/ANGPT2/ATP5PF/TOMM20
GO:0035308	negative regulation of protein dephosphorylation	9/1382	65/17913	0.0608721	0.192187	9	PTN/PPP1R14A/BOD1/ROCK2/YWHAE/LGALS3/PPP1R14B/PPP1R15A/SET
GO:0072577	endothelial cell apoptotic process	9/1382	65/17913	0.0608721	0.192187	9	ANGPTL4/GAS6/ANGPT1/NDNF/COL18A1/THBS1/CCL2/BMPR2/AKR1C3
GO:0006635	fatty acid beta-oxidation	9/1382	66/17913	0.0658879	0.204091	9	TWIST1/BDH2/ACADVL/ECH1/ETFB/HADHB/ACAA2/ECHS1/HADHA
GO:0046785	microtubule polymerization	9/1382	66/17913	0.0658879	0.204091	9	MAP1B/CAMSAP2/HSPA1B/MAP7D3/ARL2/HSPA1A/FKBP4/RPS3/AKAP9
GO:0006901	vesicle coating	9/1382	67/17913	0.0711563	0.216548	9	CD59/MCFD2/LMAN1/TFG/SEC31A/TMED9/TMED10/USO1/TMED2
GO:0032436	positive regulation of proteasomal ubiquitin-dependent protein catabolic process	9/1382	68/17913	0.0766789	0.225571	9	CLU/CAV1/DAB2/HSPA1A/RACK1/SMAD7/NOP53/STUB1/SUMO2
GO:0006353	DNA-templated transcription, termination	9/1382	69/17913	0.0824562	0.239024	9	CAVIN1/POLR2F/GTF2H5/POLR2H/POLR2E/SNRPE/POLR2L/POLR2K/SNRPF
GO:0006446	regulation of translational initiation	9/1382	69/17913	0.0824562	0.239024	9	HSPB1/NPM1/EIF4A2/DDX1/EIF5B/PPP1R15A/RPL13A/EIF3B/EIF4EBP1
GO:1903312	negative regulation of mRNA metabolic process	9/1382	69/17913	0.0824562	0.239024	9	YBX3/CIRBP/YBX1/SAP18/TOB1/C1QBP/HNRNPA0/SRSF7/ZFP36
GO:0048199	vesicle targeting, to, from or within Golgi	9/1382	70/17913	0.0884883	0.247848	9	CD59/MCFD2/LMAN1/TFG/SEC31A/TMED9/TMED10/USO1/TMED2
GO:1903747	regulation of establishment of protein localization to mitochondrion	9/1382	71/17913	0.0947748	0.263332	9	BAG3/LEPROT/YWHAE/BAD/YWHAQ/PDCD5/LMAN1/DNAJA1/TOMM7
GO:0032413	negative regulation of ion transmembrane transporter activity	9/1382	72/17913	0.101314	0.276215	9	CAV1/GEM/PLN/RRAD/CAMK2D/YWHAE/SRI/CALM2/GSTO1
GO:0032481	positive regulation of type I interferon production	9/1382	74/17913	0.115145	0.300827	9	ZBTB20/POLR2F/CTNNB1/POLR2H/IFI16/POLR2E/HSPD1/POLR2L/POLR2K
GO:0046902	regulation of mitochondrial membrane permeability	9/1382	74/17913	0.115145	0.300827	9	BNIP3/YWHAE/BAD/YWHAQ/HSPA1A/CHCHD10/ACAA2/ALKBH7/SLC25A5
GO:0086001	cardiac muscle cell action potential	9/1382	74/17913	0.115145	0.300827	9	CAV1/GJA1/ANK2/CAMK2D/YWHAE/ATP2A2/ATP1A1/FLNA/AKAP9
GO:0048024	regulation of mRNA splicing, via spliceosome	9/1382	75/17913	0.12243	0.309529	9	RBFOX2/PRDX6/NSRP1/SAP18/SNRNP70/C1QBP/HSPA8/HNRNPA1/SRSF7
GO:0048194	Golgi vesicle budding	9/1382	75/17913	0.12243	0.309529	9	CD59/MCFD2/LMAN1/TFG/SEC31A/TMED9/TMED10/USO1/TMED2
GO:1901224	positive regulation of NIK/NF-kappaB signaling	9/1382	75/17913	0.12243	0.309529	9	SASH1/TRIP6/EGFR/APP/ILK/COPS8/CALR/SPHK1/RPS3
GO:0014015	positive regulation of gliogenesis	9/1382	76/17913	0.129958	0.325598	9	SERPINE2/LRP1/PTN/MDK/HES1/CSF1/IL6ST/APP/RHEB
GO:0032760	positive regulation of tumor necrosis factor production	9/1382	78/17913	0.145722	0.354079	9	CLU/LPL/TWIST1/AKAP12/HSPB1/APP/THBS1/ZBTB20/MIF
GO:0055021	regulation of cardiac muscle tissue growth	9/1382	79/17913	0.153949	0.367165	9	FGFR1/GJA1/RBP4/YAP1/TBX2/HEY2/SAV1/IGF1/MEF2C
GO:0002690	positive regulation of leukocyte chemotaxis	9/1382	81/17913	0.171063	0.396472	9	CXCL12/RARRES2/GAS6/PTN/MDK/CSF1/THBS1/CALR/C1QBP
GO:1903557	positive regulation of tumor necrosis factor superfamily cytokine production	9/1382	81/17913	0.171063	0.396472	9	CLU/LPL/TWIST1/AKAP12/HSPB1/APP/THBS1/ZBTB20/MIF
GO:0034502	protein localization to chromosome	9/1382	82/17913	0.179938	0.39869	9	BOD1/CCT3/CCT7/CCT4/TCP1/CCT6A/CCT2/CCT8/CCT5
GO:2000106	regulation of leukocyte apoptotic process	9/1382	82/17913	0.179938	0.39869	9	CXCL12/GAS6/AXL/KITLG/LGALS3/MIF/MEF2C/TCP1/PRELID1
GO:0000079	regulation of cyclin-dependent protein serine/threonine kinase activity	9/1382	83/17913	0.189014	0.415159	9	CDKN1C/NR2F2/CCND1/EGFR/SERTAD1/PKD1/CDKN1A/HEXIM1/GADD45A
GO:0060420	regulation of heart growth	9/1382	84/17913	0.198286	0.426587	9	FGFR1/GJA1/RBP4/YAP1/TBX2/HEY2/SAV1/IGF1/MEF2C
GO:0071621	granulocyte chemotaxis	9/1382	84/17913	0.198286	0.426587	9	RARRES2/MDK/SLIT2/CSF1/JAM3/ITGA1/THBS1/LGALS3/C1QBP
GO:0043506	regulation of JUN kinase activity	9/1382	85/17913	0.207744	0.435039	9	SFRP1/FZD8/SASH1/HACD3/MAP3K20/GSTP1/MDFIC/RPS3/DNAJA1
GO:0046427	positive regulation of JAK-STAT cascade	9/1382	85/17913	0.207744	0.435039	9	CYP1B1/HES1/AGT/GHR/FGFR3/IL6ST/SOCS3/TNFRSF1A/IGF1
GO:0006094	gluconeogenesis	9/1382	86/17913	0.21738	0.447418	9	LEPR/RBP4/ATF3/FAM3C/TPI1/MDH1/MDH2/PGAM1/ENO1
GO:0002456	T cell mediated immunity	9/1382	88/17913	0.237155	0.468778	9	EMP2/IL1R1/JAG1/CD81/NECTIN2/KDELR1/SMAD7/HSPD1/RFTN1
GO:1904894	positive regulation of STAT cascade	9/1382	88/17913	0.237155	0.468778	9	CYP1B1/HES1/AGT/GHR/FGFR3/IL6ST/SOCS3/TNFRSF1A/IGF1
GO:0006903	vesicle targeting	9/1382	89/17913	0.247275	0.483928	9	CD59/MCFD2/LMAN1/TFG/SEC31A/TMED9/TMED10/USO1/TMED2
GO:0009119	ribonucleoside metabolic process	9/1382	89/17913	0.247275	0.483928	9	NT5E/NME3/NME4/ADK/RAN/NME1/CMPK1/IMPDH2/APRT
GO:0019319	hexose biosynthetic process	9/1382	89/17913	0.247275	0.483928	9	LEPR/RBP4/ATF3/FAM3C/TPI1/MDH1/MDH2/PGAM1/ENO1
GO:0050764	regulation of phagocytosis	9/1382	90/17913	0.257538	0.498826	9	LRP1/GAS6/MFGE8/ITGAV/CCL2/SOD1/CALR/SPHK1/RACK1
GO:0043473	pigmentation	9/1382	91/17913	0.267935	0.502672	9	SPARC/ENPP1/SNAI2/KITLG/CD63/ADAMTS9/MEF2C/RACK1/DCTN2
GO:0090277	positive regulation of peptide hormone secretion	9/1382	91/17913	0.267935	0.502672	9	LRP1/GJA1/RBP4/EGFR/SOX4/TCF7L2/PHPT1/BAD/SRI
GO:2001022	positive regulation of response to DNA damage stimulus	9/1382	92/17913	0.278455	0.521529	9	EGFR/PLA2R1/SPRED1/MYC/MGMT/HIC1/RPL26/RPS3/FUS
GO:0046364	monosaccharide biosynthetic process	9/1382	93/17913	0.28909	0.532827	9	LEPR/RBP4/ATF3/FAM3C/TPI1/MDH1/MDH2/PGAM1/ENO1
GO:0009062	fatty acid catabolic process	9/1382	94/17913	0.299829	0.542075	9	TWIST1/BDH2/ACADVL/ECH1/ETFB/HADHB/ACAA2/ECHS1/HADHA
GO:0007052	mitotic spindle organization	9/1382	95/17913	0.310663	0.553287	9	CEP126/HSPA1B/PKD1/MAP4/SBDS/HSPA1A/CHMP5/RAN/FLNA
GO:0007589	body fluid secretion	9/1382	95/17913	0.310663	0.553287	9	CAV1/GJA1/CDO1/CCND1/PAM/ANXA2/NME1/VEGFA/APRT
GO:0120034	positive regulation of plasma membrane bounded cell projection assembly	9/1382	95/17913	0.310663	0.553287	9	CDC42EP5/DPYSL3/NRP1/CDC42EP4/NCKAP1/CDC42EP1/WASL/FSCN1/RALA
GO:1901570	fatty acid derivative biosynthetic process	9/1382	96/17913	0.321582	0.563562	9	GGT5/PTGDS/BDH2/PTGIS/MGST3/AKR1C3/CBR1/MIF/PTGES3
GO:0120162	positive regulation of cold-induced thermogenesis	9/1382	97/17913	0.332575	0.574485	9	LEPR/EPAS1/CAV1/GJA1/DIO2/PDGFC/THRA/GNAS/VEGFA
GO:1901989	positive regulation of cell cycle phase transition	9/1382	97/17913	0.332575	0.574485	9	ADAMTS1/CCND1/EGFR/SMARCD3/PBX1/APP/RDX/NPM1/PHB2
GO:0030301	cholesterol transport	9/1382	98/17913	0.343633	0.589501	9	CLU/APOE/LRP1/CAV1/AKR1C1/LIMA1/ANXA2/PLTP/CES1
GO:0048525	negative regulation of viral process	9/1382	99/17913	0.354745	0.595205	9	IFITM3/GSN/JUN/BANF1/TRIM8/IFI16/IFITM1/MPHOSPH8/ZFP36
GO:0018107	peptidyl-threonine phosphorylation	9/1382	101/17913	0.377097	0.623669	9	PARD3/SPRED1/APP/CAMK2D/ROCK2/SPHK1/SMAD7/CALM2/DDIT4
GO:0055024	regulation of cardiac muscle tissue development	9/1382	101/17913	0.377097	0.623669	9	FGFR1/GJA1/RBP4/YAP1/TBX2/HEY2/SAV1/IGF1/MEF2C
GO:0050868	negative regulation of T cell activation	9/1382	104/17913	0.410794	0.653527	9	MDK/PDE5A/GPNMB/TWSG1/SDC4/PAWR/LGALS3/PRDX2/SMAD7
GO:0015918	sterol transport	9/1382	107/17913	0.444474	0.69012	9	CLU/APOE/LRP1/CAV1/AKR1C1/LIMA1/ANXA2/PLTP/CES1
GO:0018210	peptidyl-threonine modification	9/1382	109/17913	0.4668	0.714053	9	PARD3/SPRED1/APP/CAMK2D/ROCK2/SPHK1/SMAD7/CALM2/DDIT4
GO:0042157	lipoprotein metabolic process	9/1382	112/17913	0.499934	0.748822	9	APOE/APOD/LRP1/ITGAV/ZDHHC14/DPM3/PIGP/PYURF/APOL6
GO:0060964	regulation of gene silencing by miRNA	9/1382	113/17913	0.510853	0.760158	9	WTIP/EGFR/POLR2F/POLR2H/POLR2E/POLR2I/POLR2L/POLR2K/ZFP36
GO:0051193	regulation of cofactor metabolic process	9/1382	114/17913	0.521698	0.769394	9	NUPR1/PDK4/TMEM14C/ZBTB20/IGF1/PRDX2/EIF6/PGAM1/DDIT4
GO:0051153	regulation of striated muscle cell differentiation	9/1382	115/17913	0.532462	0.780615	9	MMP14/TMEM119/EHD2/SHOX2/IGF1/MORF4L2/MEF2C/CAPN2/YBX1
GO:0051208	sequestering of calcium ion	9/1382	117/17913	0.553721	0.782361	9	THY1/PLN/ANK2/CAMK2D/CALR/SRI/CALM2/GSTO1/HSP90B1
GO:0060147	regulation of posttranscriptional gene silencing	9/1382	117/17913	0.553721	0.782361	9	WTIP/EGFR/POLR2F/POLR2H/POLR2E/POLR2I/POLR2L/POLR2K/ZFP36
GO:0060966	regulation of gene silencing by RNA	9/1382	117/17913	0.553721	0.782361	9	WTIP/EGFR/POLR2F/POLR2H/POLR2E/POLR2I/POLR2L/POLR2K/ZFP36
GO:0032479	regulation of type I interferon production	9/1382	123/17913	0.614937	0.814331	9	ZBTB20/POLR2F/CTNNB1/POLR2H/IFI16/POLR2E/HSPD1/POLR2L/POLR2K
GO:0032606	type I interferon production	9/1382	125/17913	0.634361	0.827802	9	ZBTB20/POLR2F/CTNNB1/POLR2H/IFI16/POLR2E/HSPD1/POLR2L/POLR2K
GO:0008286	insulin receptor signaling pathway	9/1382	128/17913	0.66247	0.840106	9	RARRES2/ENPP1/FOXC2/CAV2/AGT/PDK4/NUCKS1/SHC1/EIF4EBP1
GO:0051588	regulation of neurotransmitter transport	9/1382	129/17913	0.671554	0.840869	9	PFN2/SNCG/BACE1/STXBP1/GPM6B/MEF2C/PNKD/ARL6IP5/ATP2A2
GO:0006865	amino acid transport	9/1382	134/17913	0.714728	0.86618	9	NTRK2/AGT/PDPN/SLC7A2/PPFIA2/STXBP1/NFE2L1/SLC1A3/ARL6IP5
GO:0031056	regulation of histone modification	9/1382	138/17913	0.746487	0.881102	9	LMNA/TWIST1/SNAI2/EID1/CAMK2D/SETD7/CTNNB1/VEGFA/SET
GO:0002831	regulation of response to biotic stimulus	9/1382	139/17913	0.754033	0.887182	9	HTRA1/SASH1/NECTIN2/MIF/PRDX2/OPTN/HSPD1/NOP53/C1QBP
GO:0019933	cAMP-mediated signaling	9/1382	143/17913	0.782644	0.900838	9	PTH1R/PLN/SOX9/RAMP1/ADCY3/NDUFS4/GNAS/CALM2/AHR
GO:0062013	positive regulation of small molecule metabolic process	9/1382	143/17913	0.782644	0.900838	9	NUPR1/PTH1R/TWIST1/COMT/ZBTB20/IGF1/PARK7/ISCU/ENO1
GO:0006665	sphingolipid metabolic process	9/1382	144/17913	0.789405	0.9055	9	PLPP3/A4GALT/PLPP1/KDSR/TNFRSF1A/SPHK1/RACK1/SUMF2/HEXB
GO:0060401	cytosolic calcium ion transport	9/1382	157/17913	0.863613	0.944339	9	CAV1/THY1/PLN/ANK2/CAMK2D/SRI/CALM2/ATP2A2/GSTO1
GO:0046488	phosphatidylinositol metabolic process	9/1382	159/17913	0.872905	0.949448	9	PLA2G2A/PDGFRB/PTPN13/PDGFA/PLEKHA4/MTMR2/DPM3/PIGP/PYURF
GO:0016064	immunoglobulin mediated immune response	9/1382	171/17913	0.918363	0.967825	9	CLU/SERPING1/C1R/C1S/CD81/NECTIN2/HSPD1/ERCC1/C1QBP
GO:0019724	B cell mediated immunity	9/1382	173/17913	0.924401	0.969775	9	CLU/SERPING1/C1R/C1S/CD81/NECTIN2/HSPD1/ERCC1/C1QBP
GO:0006473	protein acetylation	9/1382	195/17913	0.969193	0.991131	9	NUPR1/TWIST1/SNAI2/SOX4/EID1/PARK7/SPHK1/MDH2/SET
GO:0046474	glycerophospholipid biosynthetic process	9/1382	213/17913	0.986133	0.997441	9	PLA2G2A/PTPN13/PDGFA/PLEKHA4/MTMR2/CAPN2/DPM3/PIGP/PYURF
GO:1903405	protein localization to nuclear body	8/1382	10/17913	4.81345e-08	2.19374e-06	8	CCT3/CCT7/CCT4/TCP1/CCT6A/CCT2/CCT8/CCT5
GO:1904851	positive regulation of establishment of protein localization to telomere	8/1382	10/17913	4.81345e-08	2.19374e-06	8	CCT3/CCT7/CCT4/TCP1/CCT6A/CCT2/CCT8/CCT5
GO:1904867	protein localization to Cajal body	8/1382	10/17913	4.81345e-08	2.19374e-06	8	CCT3/CCT7/CCT4/TCP1/CCT6A/CCT2/CCT8/CCT5
GO:0070203	regulation of establishment of protein localization to telomere	8/1382	11/17913	1.64475e-07	6.34714e-06	8	CCT3/CCT7/CCT4/TCP1/CCT6A/CCT2/CCT8/CCT5
GO:0070202	regulation of establishment of protein localization to chromosome	8/1382	12/17913	4.59856e-07	1.53941e-05	8	CCT3/CCT7/CCT4/TCP1/CCT6A/CCT2/CCT8/CCT5
GO:1904816	positive regulation of protein localization to chromosome, telomeric region	8/1382	12/17913	4.59856e-07	1.53941e-05	8	CCT3/CCT7/CCT4/TCP1/CCT6A/CCT2/CCT8/CCT5
GO:1904814	regulation of protein localization to chromosome, telomeric region	8/1382	14/17913	2.42359e-06	6.24505e-05	8	CCT3/CCT7/CCT4/TCP1/CCT6A/CCT2/CCT8/CCT5
GO:0051131	chaperone-mediated protein complex assembly	8/1382	16/17913	9.02583e-06	0.000183724	8	CLU/HSP90AB1/HSPA1A/PTGES3/HSPD1/HSP90AA1/STUB1/CCT2
GO:0061684	chaperone-mediated autophagy	8/1382	16/17913	9.02583e-06	0.000183724	8	CLU/SYNPO2/BAG3/EEF1A1/SNRNP70/HSP90AA1/STUB1/HSPA8
GO:0070200	establishment of protein localization to telomere	8/1382	16/17913	9.02583e-06	0.000183724	8	CCT3/CCT7/CCT4/TCP1/CCT6A/CCT2/CCT8/CCT5
GO:0048846	axon extension involved in axon guidance	8/1382	20/17913	6.67648e-05	0.000973785	8	CXCL12/NRP2/SLIT2/SLIT3/NRP1/BMPR2/RYK/VEGFA
GO:1902284	neuron projection extension involved in neuron projection guidance	8/1382	20/17913	6.67648e-05	0.000973785	8	CXCL12/NRP2/SLIT2/SLIT3/NRP1/BMPR2/RYK/VEGFA
GO:1903055	positive regulation of extracellular matrix organization	8/1382	21/17913	0.000100576	0.0013766	8	EMILIN1/DDR2/AGT/PDPN/SOX9/PHLDB1/PHLDB2/FSCN1
GO:0044342	type B pancreatic cell proliferation	8/1382	22/17913	0.000147398	0.00194097	8	IGFBP5/IGFBP4/NUPR1/ERRFI1/SFRP1/IGFBP3/BAD/NR4A1
GO:0001945	lymph vessel development	8/1382	23/17913	0.000210796	0.0026089	8	FOXC1/NR2F2/FOXC2/PDPN/PTPN14/PKD1/BMPR2/VEGFA
GO:0060445	branching involved in salivary gland morphogenesis	8/1382	23/17913	0.000210796	0.0026089	8	FGFR1/FGF7/NRP1/SNAI2/PDGFA/NTN4/PLXND1/TGM2
GO:0070199	establishment of protein localization to chromosome	8/1382	24/17913	0.000294932	0.00341342	8	CCT3/CCT7/CCT4/TCP1/CCT6A/CCT2/CCT8/CCT5
GO:0034110	regulation of homotypic cell-cell adhesion	8/1382	25/17913	0.000404589	0.00429886	8	LGALS1/SERPINE2/C1QTNF1/PDPN/PRKG1/ZNF703/CD9/RDX
GO:0050919	negative chemotaxis	8/1382	26/17913	0.000545192	0.0053908	8	NRP2/SLIT2/SLIT3/FLRT2/PDGFA/EFNA5/ITGAV/RYK
GO:0060351	cartilage development involved in endochondral bone morphogenesis	8/1382	26/17913	0.000545192	0.0053908	8	COL1A1/SERPINH1/SOX9/COL27A1/SHOX2/COMP/TRIP11/COL2A1
GO:0042273	ribosomal large subunit biogenesis	8/1382	27/17913	0.000722816	0.00687789	8	RPL5/RPL11/RPL14/EIF6/NOP53/RPL26/RPF2/RPL35A
GO:0010894	negative regulation of steroid biosynthetic process	8/1382	28/17913	0.000944187	0.00850381	8	APOE/BMP5/DKK3/SNAI2/SNAI1/SOD1/INSIG2/ATP1A1
GO:0070198	protein localization to chromosome, telomeric region	8/1382	28/17913	0.000944187	0.00850381	8	CCT3/CCT7/CCT4/TCP1/CCT6A/CCT2/CCT8/CCT5
GO:0010543	regulation of platelet activation	8/1382	30/17913	0.00154827	0.0124872	8	APOE/SERPINE2/PDGFRA/C1QTNF1/PDPN/PDGFA/PRKG1/CD9
GO:0045939	negative regulation of steroid metabolic process	8/1382	30/17913	0.00154827	0.0124872	8	APOE/BMP5/DKK3/SNAI2/SNAI1/SOD1/INSIG2/ATP1A1
GO:1900181	negative regulation of protein localization to nucleus	8/1382	30/17913	0.00154827	0.0124872	8	APOD/TMEM98/ANGPT1/DCLK1/OTUD7B/LZTS2/PKIG/MDFIC
GO:0030513	positive regulation of BMP signaling pathway	8/1382	31/17913	0.00194754	0.0151152	8	HES1/SULF1/NEO1/FOXD1/TWSG1/ENG/BMPR2/ILK
GO:0035767	endothelial cell chemotaxis	8/1382	31/17913	0.00194754	0.0151152	8	FGFR1/SMOC2/NRP1/HSPB1/THBS1/RAB13/NR4A1/VEGFA
GO:0071295	cellular response to vitamin	8/1382	32/17913	0.00242365	0.0178624	8	COL1A1/TNC/BGLAP/GAS6/PTN/SFRP1/SNAI2/KANK2
GO:0071709	membrane assembly	8/1382	32/17913	0.00242365	0.0178624	8	EMP2/CAV1/CAV2/PTPRD/NRXN2/ANXA2/S100A10/RFTN1
GO:1901099	negative regulation of signal transduction in absence of ligand	8/1382	32/17913	0.00242365	0.0178624	8	UNC5B/SNAI2/HSPA1B/CTNNA1/HSPA1A/PRDX2/COL2A1/IFI6
GO:2001240	negative regulation of extrinsic apoptotic signaling pathway in absence of ligand	8/1382	32/17913	0.00242365	0.0178624	8	UNC5B/SNAI2/HSPA1B/CTNNA1/HSPA1A/PRDX2/COL2A1/IFI6
GO:0042455	ribonucleoside biosynthetic process	8/1382	33/17913	0.00298624	0.0212517	8	NT5E/NME3/NME4/ADK/NME1/CMPK1/IMPDH2/APRT
GO:0018149	peptide cross-linking	8/1382	34/17913	0.00364543	0.0247951	8	DCN/FN1/COL3A1/BGN/NDNF/THBS1/KRT10/TGM2
GO:0000413	protein peptidyl-prolyl isomerization	8/1382	35/17913	0.00441172	0.0286156	8	PPIC/FKBP10/FKBP9/FKBP7/PPIB/FKBP2/PIN4/PPIA
GO:0003203	endocardial cushion morphogenesis	8/1382	35/17913	0.00441172	0.0286156	8	BMP5/TWIST1/SNAI2/SOX9/TBX2/HEY2/ENG/SNAI1
GO:0007339	binding of sperm to zona pellucida	8/1382	35/17913	0.00441172	0.0286156	8	CCT3/VDAC2/CCT7/CCT4/TCP1/CCT2/CCT8/CCT5
[truncated: 3,751 more rows]
