# Supplementary material for: Single-cell RNA sequencing of human femoral head in vivo
Source: Aging (Albany NY). 2021 Jun 10;13(11):15595–619. doi: 10.18632/aging.203124 (PMC8221309; doi:10.18632/aging.203124)
Supplement: Supplementary Table 3 [file aging-13-203124-s004.xlsx]

## Sheet: Sheet1
Supplementary Table 3. KEGG enrichment analyses of osteoblastic lineage cells.
ID	Description	GeneRatio	BgRatio	pvalue	p.adjust	Count	geneID
hsa05016	Huntington disease	69/759	264/8017	1.15134e-15	1.27845e-13	69	NDUFA4L2/COX7A1/GPX3/GPX8/MAPK10/SLC1A3/SOD1/NDUFS4/TUBB2A/IFT57/TUBB6/POLR2F/ATP5MC3/NDUFC2/NDUFB4/ATP5PF/TUBA1C/COX6C/SDHD/NDUFB7/TUBB/POLR2H/NDUFC1/VDAC2/NDUFB2/NDUFA8/TUBA1B/CLTA/NDUFA5/NDUFS5/NDUFA4/POLR2E/VDAC1/DCTN2/NDUFAB1/NDUFA12/POLR2I/SLC25A6/TUBA1A/NDUFB10/ATP5MC1/NDUFA13/NDUFB5/ATP5F1C/UQCRQ/NDUFV2/NDUFB6/TGM2/COX6A1/CYC1/NDUFB8/NDUFA6/AP2M1/DCTN6/TUBB4B/POLR2L/NDUFA11/ATP5PO/POLR2K/…
hsa04151	PI3K-Akt signaling pathway	67/759	354/8017	1.60729e-08	4.41275e-07	67	COL1A1/COL1A2/IBSP/FN1/COL6A2/COL6A1/TNC/COL6A3/FGFR1/PDGFRB/FGF7/PDGFRA/NTRK2/CHAD/PGF/LAMA4/ITGB5/CCND1/COL4A1/ITGA10/LAMB2/COL4A2/CSF1/ANGPT1/GNG12/GNG11/KITLG/NGFR/OSMR/LAMC1/GHR/PDGFA/LAMB1/FGFR3/EGFR/THBS2/EFNA5/ITGA7/ITGA1/PTK2/COMP/PDGFC/ITGB1/ITGAV/THBS1/VEGFB/PDGFD/YWHAE/HSP90AB1/SPP1/PPP2CB/BAD/ITGA8/IGF1/AKT3/MYC/YWHAQ/CDKN1A/COL2A1/ANGPT2/NR4A1/RHEB/HSP90AA1/VEGFA/HSP90B1/DDIT4/EIF4E…
hsa03010	Ribosome	63/759	153/8017	5.69422e-26	1.71965e-23	63	RPL5/RPL7A/MRPL32/RPL10/RPL24/RPLP0/MRPL18/RPL29/RPL15/MRPL34/RPS18/RPL10A/RPL3/RPS27L/RPS5/RPS4X/MRPL27/MRPS21/RPS23/RPL41/RPS2/RPL11/RPL35/RPL8/RPL14/RPL37A/MRPL17/RPS9/RPS27A/MRPL36/MRPL33/RPS4Y1/RPL18/RPL23A/RPL6/RPS3A/RPS19/RPL26/RPL19/RPL18A/RPS16/RPL32/RPL12/RPS3/RPL13/MRPL20/MRPL14/MRPS6/RPL35A/MRPS15/RPL36/RPL4/RPL36A/RPS25/RPL13A/RPL17/RPL22L1/MRPL11/RPS13/MRPL3/RPL31/RPS17/RPL22
hsa04510	Focal adhesion	58/759	199/8017	1.26998e-15	1.27845e-13	58	COL1A1/COL1A2/IBSP/FN1/COL6A2/MYL9/COL6A1/TNC/COL6A3/PDGFRB/CAV1/PDGFRA/CHAD/PGF/LAMA4/ITGB5/CCND1/CAV2/COL4A1/ITGA10/LAMB2/COL4A2/PARVA/MAPK10/LAMC1/PDGFA/LAMB1/EGFR/THBS2/DOCK1/ITGA7/MYLK/ITGA1/PTK2/COMP/PDGFC/ITGB1/ITGAV/THBS1/VEGFB/PDGFD/JUN/ROCK2/SPP1/ILK/BAD/ITGA8/IGF1/AKT3/FLNB/SHC1/CTNNB1/COL2A1/CAPN2/ARHGAP5/VEGFA/FLNA/ACTG1
hsa04714	Thermogenesis	53/759	231/8017	5.55952e-10	2.09872e-08	53	NDUFA4L2/FGFR1/COX7A1/PRKG1/SMARCD3/ADCY3/NDUFS4/MGLL/ATP5MC3/NDUFC2/NDUFB4/ATP5PF/COX6C/NDUFAF2/SDHD/NDUFB7/NDUFC1/GNAS/NDUFB2/COX11/NDUFAF3/COA4/NDUFA8/NDUFA5/NDUFS5/NDUFA4/NDUFAB1/RHEB/NDUFA12/NDUFB10/ATP5MC1/NDUFA13/NDUFB5/ATP5F1C/UQCRQ/NDUFV2/NDUFB6/COX6A1/CYC1/NDUFB8/NDUFA6/COX20/NDUFA11/ATP5PO/ATP5F1D/NDUFB3/ATP5F1B/ATP5MF/COX7C/ATP5ME/UQCRH/UQCRB/ACTG1
hsa05165	Human papillomavirus infection	53/759	330/8017	7.45175e-05	0.00127792	53	COL1A1/COL1A2/IBSP/FN1/COL6A2/COL6A1/TNC/COL6A3/PDGFRB/HES1/HES4/NOTCH3/CHAD/LAMA4/ITGB5/CCND1/COL4A1/FZD8/ITGA10/LAMB2/COL4A2/LAMC1/LAMB1/HEY2/EGFR/THBS2/PARD3/TCF7L1/ITGA7/JAG1/ITGA1/PTK2/COMP/TCF7L2/ITGB1/ITGAV/THBS1/SPP1/TNFRSF1A/PPP2CB/MAML2/BAD/ITGA8/AKT3/CDKN1A/CTNNB1/COL2A1/GNAS/RHEB/PKM/VEGFA/PSMC1/EIF4EBP1
hsa05010	Alzheimer disease	49/759	171/8017	4.58455e-13	2.76907e-11	49	APOE/NDUFA4L2/LRP1/LPL/COX7A1/BACE1/APP/NDUFS4/TNFRSF1A/BAD/ATP5MC3/NDUFC2/NDUFB4/ATP5PF/COX6C/CAPN2/SDHD/NDUFB7/NDUFC1/NDUFB2/NDUFA8/NDUFA5/NDUFS5/NDUFA4/NDUFAB1/NDUFA12/CALM2/NDUFB10/ATP2A2/ATP5MC1/NDUFA13/NDUFB5/ATP5F1C/UQCRQ/NDUFV2/NDUFB6/COX6A1/CYC1/NDUFB8/NDUFA6/NDUFA11/ATP5PO/ATP5F1D/NDUFB3/ATP5F1B/COX7C/UQCRH/UQCRB/CYCS
hsa05012	Parkinson disease	46/759	142/8017	1.65353e-14	1.24841e-12	46	NDUFA4L2/COX7A1/NDUFS4/PARK7/ATP5MC3/NDUFC2/NDUFB4/ATP5PF/COX6C/SDHD/NDUFB7/NDUFC1/VDAC2/NDUFB2/NDUFA8/NDUFA5/NDUFS5/NDUFA4/VDAC1/NDUFAB1/NDUFA12/SLC25A6/NDUFB10/UBB/ATP5MC1/NDUFA13/NDUFB5/ATP5F1C/UQCRQ/NDUFV2/NDUFB6/COX6A1/CYC1/NDUFB8/NDUFA6/NDUFA11/ATP5PO/VDAC3/ATP5F1D/NDUFB3/ATP5F1B/COX7C/UQCRH/UQCRB/SLC25A5/CYCS
hsa05205	Proteoglycans in cancer	43/759	204/8017	3.22715e-07	8.12165e-06	43	COL1A1/COL1A2/DCN/FN1/LUM/TIMP3/FGFR1/MMP2/CAV1/SDC2/RRAS/ITGB5/CCND1/CTSL/CAV2/FZD8/CTTN/TWIST1/HSPG2/HSPB2/MRAS/EGFR/ANK2/GPC1/SDC4/PTK2/CD63/ITGB1/ITGAV/THBS1/CAMK2D/ROCK2/ARHGEF12/IGF1/AKT3/MYC/RDX/CDKN1A/FLNB/CTNNB1/VEGFA/FLNA/ACTG1
hsa00190	Oxidative phosphorylation	42/759	133/8017	6.26774e-13	3.15476e-11	42	NDUFA4L2/COX7A1/NDUFS4/ATP5MC3/NDUFC2/NDUFB4/ATP5PF/COX6C/SDHD/NDUFB7/NDUFC1/NDUFB2/COX11/NDUFA8/NDUFA5/NDUFS5/NDUFA4/PPA1/NDUFAB1/NDUFA12/NDUFB10/ATP5MC1/NDUFA13/NDUFB5/ATP5F1C/UQCRQ/NDUFV2/NDUFB6/COX6A1/CYC1/NDUFB8/NDUFA6/NDUFA11/ATP5PO/ATP5F1D/NDUFB3/ATP5F1B/ATP5MF/COX7C/ATP5ME/UQCRH/UQCRB
hsa05132	Salmonella infection	42/759	214/8017	3.20477e-06	6.91314e-05	42	MYL9/RRAS/MYO6/NCKAP1/PFN2/MAPK10/WASF3/DYNC2H1/TCF7L1/RHOB/ANXA2/TCF7L2/AHNAK/MYH11/S100A10/DYNLL1/WASL/JUN/MYH10/ROCK2/HSP90AB1/TNFRSF1A/MYL6B/DYNC1I2/AKT3/MYC/ARPC1A/FLNB/CTNNB1/SNX9/DYNC1LI2/SKP1/RALA/HSP90AA1/DYNLRB1/FLNA/RPS3/TXN2/HSP90B1/FOS/CYCS/ACTG1
hsa04010	MAPK signaling pathway	41/759	295/8017	0.0075071	0.0596617	41	FGFR1/PDGFRB/FGF7/PDGFRA/NTRK2/PGF/RRAS/CSF1/ANGPT1/GNG12/KITLG/NGFR/MAPK10/PDGFA/MRAS/FGFR3/EGFR/EFNA5/IL1R1/HSPB1/HSPA1B/PDGFC/GADD45B/VEGFB/PDGFD/JUN/TNFRSF1A/MAP3K20/IGF1/AKT3/MYC/HSPA1A/FLNB/MEF2C/ANGPT2/NR4A1/VEGFA/HSPA8/FLNA/FOS/GADD45A
hsa04810	Regulation of actin cytoskeleton	39/759	213/8017	3.83485e-05	0.000772083	39	FN1/CXCL12/MYL9/FGFR1/PDGFRB/FGF7/PDGFRA/ENAH/RRAS/ITGB5/ITGA10/GNG12/NCKAP1/PFN2/PDGFA/SCIN/MRAS/FGFR3/EGFR/DOCK1/ITGA7/MYLK/ABI2/ITGA1/PTK2/PDGFC/ITGB1/ITGAV/PDGFD/WASL/GSN/MYH10/ROCK2/CFL2/ARHGEF12/ITGA8/RDX/ARPC1A/ACTG1
hsa04932	Non-alcoholic fatty liver disease (NAFLD)	38/759	149/8017	7.71902e-09	2.59016e-07	38	NDUFA4L2/LEPR/COX7A1/MAPK10/SOCS3/JUN/NDUFS4/TNFRSF1A/AKT3/NDUFC2/NDUFB4/COX6C/SDHD/NDUFB7/NDUFC1/NDUFB2/NDUFA8/NDUFA5/NDUFS5/NDUFA4/NDUFAB1/NDUFA12/NDUFB10/NDUFA13/NDUFB5/UQCRQ/NDUFV2/NDUFB6/COX6A1/CYC1/NDUFB8/NDUFA6/NDUFA11/NDUFB3/COX7C/UQCRH/UQCRB/CYCS
hsa05418	Fluid shear stress and atherosclerosis	36/759	139/8017	1.24024e-08	3.74551e-07	36	VCAM1/MMP2/CAV1/SDC2/CTSL/CAV2/GSTM3/MAPK10/PDGFA/GPC1/IL1R1/SDC4/PTK2/ITGAV/CCL2/MGST3/JUN/BMPR2/HSP90AB1/TNFRSF1A/AKT3/GSTP1/MEF2C/CTNNB1/MEF2A/CALM2/SQSTM1/HSP90AA1/GSTO1/VEGFA/KLF2/TXN2/HSP90B1/FOS/SUMO2/ACTG1
hsa04015	Rap1 signaling pathway	36/759	210/8017	0.000297139	0.00472295	36	FGFR1/PDGFRB/ID1/FGF7/PDGFRA/ENAH/PGF/RRAS/CSF1/ANGPT1/KITLG/PFN2/NGFR/PDGFA/MRAS/FGFR3/EGFR/EFNA5/PARD3/PDGFC/ITGB1/THBS1/VEGFB/ADCY3/PDGFD/AFDN/CTNND1/IGF1/AKT3/CTNNB1/ANGPT2/GNAS/CALM2/RALA/VEGFA/ACTG1
hsa05130	Pathogenic Escherichia coli infection	33/759	202/8017	0.00124015	0.0144048	33	MYO1B/CTTN/TJP1/MYO6/NCKAP1/MAPK10/WASF3/IL1R1/MYO10/ITGB1/MYO1D/MYO1C/MYH11/WASL/JUN/MYH10/ROCK2/TNFRSF1A/ARHGEF12/TUBB2A/ARPC1A/TUBB6/TUBA1C/TUBB/TUBA1B/TMED10/TUBA1A/NCL/RPS3/TUBB4B/FOS/CYCS/ACTG1
hsa04014	Ras signaling pathway	33/759	232/8017	0.0111505	0.0821333	33	PLA2G2A/FGFR1/PDGFRB/FGF7/PDGFRA/NTRK2/PGF/RRAS/CSF1/ANGPT1/GNG12/GNG11/KITLG/NGFR/MAPK10/PDGFA/MRAS/FGFR3/EGFR/EFNA5/PDGFC/VEGFB/PDGFD/AFDN/BAD/IGF1/AKT3/SHC1/ANGPT2/ABL2/CALM2/RALA/VEGFA
hsa04141	Protein processing in endoplasmic reticulum	32/759	166/8017	6.81886e-05	0.00127792	32	CRYAB/MAPK10/TUSC3/HSPA1B/RRBP1/HSP90AB1/DAD1/HSPA1A/CALR/LMAN1/SEC31A/ERLEC1/PDIA6/CAPN2/SKP1/PDIA3/SEC61G/OS9/SSR3/MBTPS1/HSP90AA1/STUB1/HSPA8/DNAJA1/P4HB/PDIA4/SSR2/HSPA5/PPP1R15A/RNF5/HSP90B1/SEC61B
hsa04512	ECM-receptor interaction	30/759	88/8017	1.59184e-10	6.86767e-09	30	COL1A1/COL1A2/IBSP/FN1/COL6A2/COL6A1/TNC/COL6A3/CHAD/LAMA4/ITGB5/COL4A1/ITGA10/LAMB2/COL4A2/HSPG2/LAMC1/LAMB1/THBS2/NPNT/ITGA7/ITGA1/SDC4/COMP/ITGB1/ITGAV/THBS1/SPP1/ITGA8/COL2A1
hsa04360	Axon guidance	28/759	181/8017	0.00615448	0.0533585	28	CXCL12/MYL9/ENAH/RRAS/RGS3/SLIT2/SLIT3/UNC5B/NRP1/SRGAP1/EPHA3/NEO1/BOC/NTN4/EFNA5/PARD3/PTK2/ITGB1/SRGAP3/PLXNB2/CAMK2D/ROCK2/BMPR2/ILK/CFL2/ARHGEF12/RYK/DPYSL2
hsa04723	Retrograde endocannabinoid signaling	27/759	148/8017	0.00061786	0.00792357	27	NDUFA4L2/GNG12/GNG11/MAPK10/ADCY3/NDUFS4/MGLL/NDUFC2/NDUFB4/NDUFB7/NDUFC1/NDUFB2/NDUFA8/NDUFA5/NDUFS5/NDUFA4/NDUFAB1/NDUFA12/NDUFB10/NDUFA13/NDUFB5/NDUFV2/NDUFB6/NDUFB8/NDUFA6/NDUFA11/NDUFB3
hsa04145	Phagosome	26/759	152/8017	0.00204129	0.0212576	26	C1R/MRC2/ITGB5/CTSL/COLEC12/DYNC2H1/THBS2/PLA2R1/COMP/ITGB1/EEA1/ITGAV/THBS1/DYNC1I2/TUBB2A/TUBB6/CALR/TUBA1C/TUBB/DYNC1LI2/SEC61G/TUBA1B/TUBA1A/TUBB4B/SEC61B/ACTG1
hsa05163	Human cytomegalovirus infection	26/759	225/8017	0.165373	0.53852	26	CXCL12/PDGFRA/CCND1/GNG12/GNG11/EGFR/IL1R1/PTK2/ITGAV/CCL2/ADCY3/ROCK2/TNFRSF1A/ARHGEF12/AKT3/MYC/CDKN1A/CALR/CTNNB1/GNAS/PDIA3/RHEB/CALM2/VEGFA/EIF4EBP1/CYCS
hsa05131	Shigellosis	26/759	236/8017	0.233684	0.672119	26	MYL9/GJA1/CTTN/PFN2/MAPK10/EGFR/DOCK1/IL1R1/PTK2/ITGB1/BNIP3/WASL/JUN/ROCK2/TNFRSF1A/ILK/AKT3/RRAGA/ARPC1A/CAPN2/SKP1/VDAC1/SQSTM1/UBB/CYCS/ACTG1
hsa04530	Tight junction	25/759	169/8017	0.0159816	0.109692	25	MYL9/CCND1/CTTN/TJP1/AMOTL2/MAPK10/SYNPO/JAM3/PARD3/AMOTL1/ITGB1/MYH11/JUN/AFDN/MYH10/YBX3/RAB13/ROCK2/PPP2CB/MYL6B/RDX/TUBA1C/TUBA1B/TUBA1A/ACTG1
hsa05166	Human T-cell leukemia virus 1 infection	25/759	219/8017	0.187041	0.57057	25	CCND1/NRP1/MAPK10/IL1R1/EGR1/LTBR/ADCY3/JUN/TNFRSF1A/AKT3/MYC/CDKN1A/CALR/VDAC2/ANAPC11/RAN/VDAC1/SLC25A6/RANBP1/VDAC3/FDPS/FOS/CDC26/ZFP36/SLC25A5
hsa05206	MicroRNAs in cancer	25/759	310/8017	0.831006	1	25	TPM1/TNC/CYP1B1/TIMP3/PDGFRB/PDGFRA/NOTCH3/CCND1/PDGFA/FGFR3/EGFR/EFNA5/SOX4/VIM/THBS1/BMPR2/MYC/FSCN1/RDX/CDKN1A/SHC1/ZEB1/VEGFA/DDIT4/MARCKS
hsa04390	Hippo signaling pathway	23/759	155/8017	0.0195997	0.128676	23	ID1/CCND1/FRMD6/BMP5/FZD8/WWTR1/SNAI2/YAP1/WTIP/TEAD1/PARD3/TCF7L1/TCF7L2/SAV1/BMPR2/YWHAE/PPP2CB/CTNNA1/MYC/YWHAQ/CTNNB1/SMAD7/ACTG1
hsa04144	Endocytosis	23/759	249/8017	0.582933	1	23	CAV1/PDGFRA/CAV2/EHD2/PSD3/FGFR3/EGFR/PARD3/DAB2/HSPA1B/EEA1/EPN2/WASL/HSPA1A/ARPC1A/CHMP5/MVB12A/CLTA/UBB/WASHC3/CBLB/HSPA8/AP2M1
hsa04022	cGMP-PKG signaling pathway	22/759	167/8017	0.0690742	0.289728	22	MYL9/PLN/EDNRA/KCNMA1/PRKG1/PDE5A/MYLK/ADCY3/ROCK2/GUCY1A1/BAD/AKT3/MEF2C/VDAC2/MEF2A/VDAC1/CALM2/SLC25A6/ATP2A2/ATP1A1/VDAC3/SLC25A5
hsa05224	Breast cancer	21/759	147/8017	0.0361365	0.19146	21	FGFR1/FGF7/HES1/NOTCH3/CCND1/FZD8/HEY2/EGFR/TCF7L1/JAG1/TCF7L2/GADD45B/JUN/IGF1/AKT3/MYC/CDKN1A/SHC1/CTNNB1/FOS/GADD45A
hsa05169	Epstein-Barr virus infection	21/759	201/8017	0.349777	0.838353	21	HES1/CCND1/MAPK10/VIM/SEM1/GADD45B/JUN/AKT3/MYC/CDKN1A/CALR/PSMC3/PDIA3/PSMD8/PSMD2/PSMC5/PSMD3/PSMC1/GADD45A/PSMC4/CYCS
hsa04350	TGF-beta signaling pathway	20/759	94/8017	0.000410131	0.00619298	20	DCN/ID3/FMOD/ID4/FBN1/ID1/NBL1/LTBP1/BMP5/BAMBI/NEO1/FST/THBS1/SMAD5/BMPR2/PPP2CB/MYC/SKP1/SMAD7/INHBA
hsa04974	Protein digestion and absorption	20/759	95/8017	0.00047443	0.00651263	20	COL1A1/COL1A2/COL3A1/COL6A2/COL6A1/COL6A3/COL5A2/COL11A1/COL14A1/COL5A1/COL12A1/COL4A1/COL4A2/COL5A3/COL27A1/COL13A1/COL15A1/COL18A1/COL2A1/ATP1A1
hsa05215	Prostate cancer	20/759	97/8017	0.000629688	0.00792357	20	FGFR1/PDGFRB/PDGFRA/CCND1/PDGFA/EGFR/TCF7L1/TCF7L2/PDGFC/PDGFD/HSP90AB1/BAD/IGF1/AKT3/CDKN1A/GSTP1/CTNNB1/ZEB1/HSP90AA1/HSP90B1
hsa04210	Apoptosis	20/759	136/8017	0.0307207	0.171809	20	LMNA/CTSK/CTSL/CTSF/PTPN13/MAPK10/GADD45B/JUN/TNFRSF1A/BAD/AKT3/TUBA1C/CTSB/CAPN2/TUBA1B/TUBA1A/FOS/GADD45A/CYCS/ACTG1
hsa04072	Phospholipase D signaling pathway	20/759	148/8017	0.0651299	0.285061	20	PDGFRB/PDGFRA/PLPP3/RRAS/AGT/KITLG/PDGFA/PTGFR/MRAS/EGFR/PLPP1/PDGFC/ADCY3/PDGFD/AKT3/SHC1/SPHK1/GNAS/RHEB/RALA
hsa04218	Cellular senescence	20/759	160/8017	0.119736	0.425416	20	RRAS/CCND1/MRAS/IGFBP3/GADD45B/ZFP36L1/AKT3/MYC/CDKN1A/CAPN2/VDAC2/VDAC1/RHEB/CALM2/SLC25A6/SQSTM1/VDAC3/GADD45A/EIF4EBP1/SLC25A5
hsa04024	cAMP signaling pathway	20/759	216/8017	0.577158	1	20	MYL9/FXYD1/RRAS/PLN/SOX9/MAPK10/SSTR2/EDNRA/ADCY3/JUN/AFDN/CAMK2D/ROCK2/BAD/AKT3/GNAS/CALM2/ATP2A2/ATP1A1/FOS
hsa04540	Gap junction	19/759	88/8017	0.000467483	0.00651263	19	PDGFRB/PDGFRA/GJA1/TJP1/PDGFA/PRKG1/EGFR/PDGFC/ADCY3/PDGFD/GUCY1A1/TUBB2A/TUBB6/TUBA1C/TUBB/GNAS/TUBA1B/TUBA1A/TUBB4B
hsa05414	Dilated cardiomyopathy (DCM)	19/759	96/8017	0.00142912	0.015985	19	TPM2/TPM1/LMNA/ITGB5/SGCB/AGT/ITGA10/PLN/ITGA7/ITGA1/ITGB1/ITGAV/ADCY3/ITGA8/IGF1/TPM4/GNAS/ATP2A2/ACTG1
hsa04926	Relaxin signaling pathway	19/759	129/8017	0.0341105	0.187298	19	COL1A1/COL1A2/COL3A1/ACTA2/MMP2/COL4A1/COL4A2/GNG12/GNG11/MAPK10/EGFR/VEGFB/ADCY3/JUN/AKT3/SHC1/GNAS/VEGFA/FOS
hsa04270	Vascular smooth muscle contraction	19/759	132/8017	0.0418376	0.214152	19	CALD1/ACTA2/PLA2G2A/MYL9/AGT/EDNRA/RAMP1/KCNMA1/PRKG1/MYLK/PPP1R14A/MYH11/ADCY3/ROCK2/GUCY1A1/ARHGEF12/MYL6B/GNAS/CALM2
hsa04310	Wnt signaling pathway	19/759	160/8017	0.178419	0.551639	19	SFRP4/SERPINF1/WIF1/CCND1/SFRP1/FZD8/MAPK10/DAAM2/BAMBI/TCF7L1/TCF7L2/CBY1/JUN/CAMK2D/ROCK2/MYC/RYK/CTNNB1/SKP1
hsa05225	Hepatocellular carcinoma	19/759	168/8017	0.239081	0.681157	19	CCND1/FZD8/GSTM3/EGFR/TCF7L1/SMARCD3/TCF7L2/GADD45B/MGST3/BAD/AKT3/MYC/CDKN1A/GSTP1/SHC1/CTNNB1/GSTO1/GADD45A/ACTG1
hsa05167	Kaposi sarcoma-associated herpesvirus infection	19/759	186/8017	0.398743	0.890697	19	CCND1/GNG12/GNG11/MAPK10/IL6ST/JUN/TNFRSF1A/AKT3/MYC/CDKN1A/CTNNB1/ANGPT2/RCAN1/CALM2/UBB/VEGFA/FOS/ZFP36/CYCS
hsa04020	Calcium signaling pathway	19/759	193/8017	0.46463	0.948096	19	PDGFRB/PDGFRA/PLN/EDNRA/PTGFR/EGFR/MYLK/ASPH/ADCY3/CAMK2D/SPHK1/GNAS/VDAC2/VDAC1/CALM2/SLC25A6/ATP2A2/VDAC3/SLC25A5
hsa04060	Cytokine-cytokine receptor interaction	19/759	294/8017	0.97583	1	19	CXCL12/LEPR/ACKR3/BMP5/CSF1/LIFR/NGFR/OSMR/GHR/TNFRSF11B/IL1R1/IL6ST/LTBR/TNFRSF12A/CCL2/TNFSF12/BMPR2/TNFRSF1A/INHBA
hsa04520	Adherens junction	18/759	71/8017	7.61674e-05	0.00127792	18	FGFR1/TJP1/SNAI2/WASF3/EGFR/PARD3/TCF7L1/LMO7/TCF7L2/SNAI1/WASL/AFDN/NECTIN2/CTNNA1/CTNND1/CTNNB1/YES1/ACTG1
hsa04371	Apelin signaling pathway	18/759	137/8017	0.0951194	0.366289	18	ACTA2/NOTCH3/RRAS/CCND1/GNG12/GNG11/MRAS/JAG1/MYLK/EGR1/ADCY3/SPP1/AKT3/MEF2C/SPHK1/MEF2A/CALM2/KLF2
hsa04550	Signaling pathways regulating pluripotency of stem cells	18/759	140/8017	0.111002	0.403885	18	ID3/FGFR1/ID4/ID1/DLX5/ZFHX3/FZD8/LIFR/FGFR3/IL6ST/KLF4/SMAD5/BMPR2/IGF1/AKT3/MYC/CTNNB1/INHBA
hsa04921	Oxytocin signaling pathway	18/759	153/8017	0.197086	0.595199	18	MYL9/CCND1/EGFR/MYLK/ADCY3/JUN/CAMK2D/ROCK2/GUCY1A1/MYL6B/CDKN1A/MEF2C/RCAN1/EEF2/GNAS/CALM2/FOS/ACTG1
hsa05202	Transcriptional misregulation in cancer	18/759	186/8017	0.497924	0.963929	18	NUPR1/NGFR/PDGFA/HOXA10/RUNX1T1/SIX1/IGFBP3/RUNX2/PTK2/PBX1/GADD45B/IGF1/MYC/CDKN1A/MEF2C/ZEB1/GADD45A/FUS
hsa05170	Human immunodeficiency virus 1 infection	18/759	212/8017	0.722986	1	18	GNG12/GNG11/MAPK10/PTK2/JUN/TNFRSF1A/CFL2/BAD/AKT3/CALR/SKP1/PDIA3/RNF7/CALM2/AP1S1/ELOC/FOS/CYCS
hsa05222	Small cell lung cancer	17/759	92/8017	0.00523552	0.047913	17	FN1/LAMA4/CCND1/COL4A1/LAMB2/COL4A2/LAMC1/LAMB1/PTK2/ITGB1/ITGAV/GADD45B/AKT3/MYC/CDKN1A/GADD45A/CYCS
hsa04933	AGE-RAGE signaling pathway in diabetic complications	17/759	100/8017	0.012106	0.0870477	17	COL1A1/COL1A2/FN1/COL3A1/VCAM1/MMP2/CCND1/COL4A1/AGT/COL4A2/MAPK10/EGR1/CCL2/VEGFB/JUN/AKT3/VEGFA
hsa04066	HIF-1 signaling pathway	17/759	109/8017	0.0267498	0.161171	17	TIMP1/TF/ANGPT1/EGFR/LTBR/CAMK2D/IGF1/AKT3/CDKN1A/ANGPT2/LDHA/LDHB/ELOC/VEGFA/PFKP/EIF4EBP1/ENO1
hsa04919	Thyroid hormone signaling pathway	17/759	119/8017	0.0553909	0.254332	17	NOTCH3/CCND1/DIO2/PLN/RCAN2/ITGAV/THRA/BAD/AKT3/MYC/CTNNB1/RCAN1/RHEB/ATP2A2/ATP1A1/PFKP/ACTG1
hsa00230	Purine metabolism	17/759	130/8017	0.106001	0.395215	17	ENPP1/NT5E/PDE5A/AK1/NME3/ADCY3/NT5C3B/GUCY1A1/NME4/PAPSS2/PAPSS1/ADK/NME1/PKM/IMPDH2/NUDT5/APRT
hsa04915	Estrogen signaling pathway	17/759	138/8017	0.156458	0.525004	17	MMP2/EGFR/HSPA1B/ADCY3/JUN/HSP90AB1/AKT3/HSPA1A/SHC1/KRT10/GNAS/FKBP4/CALM2/HSP90AA1/HSPA8/HSP90B1/FOS
hsa03050	Proteasome	16/759	45/8017	1.65962e-06	3.85541e-05	16	PSMB5/SEM1/PSMC3/PSMB6/PSMB1/PSMD8/PSMD2/PSMA3/PSMC5/PSMD3/PSMB7/PSMC1/PSMA2/PSMA1/PSMC4/PSME2
hsa05100	Bacterial invasion of epithelial cells	16/759	73/8017	0.00108172	0.0130672	16	FN1/CAV1/CAV2/CTTN/DOCK1/PTK2/ITGB1/WASL/CTNNA1/ARHGAP10/ILK/ARPC1A/SHC1/CTNNB1/CLTA/ACTG1
hsa05412	Arrhythmogenic right ventricular cardiomyopathy (ARVC)	16/759	77/8017	0.00196052	0.0211456	16	LMNA/GJA1/ITGB5/SGCB/ITGA10/TCF7L1/ITGA7/ITGA1/TCF7L2/ITGB1/ITGAV/CTNNA1/ITGA8/CTNNB1/ATP2A2/ACTG1
hsa05210	Colorectal cancer	16/759	86/8017	0.0062099	0.0533585	16	CCND1/MAPK10/EGFR/TCF7L1/TCF7L2/GADD45B/JUN/BAD/AKT3/MYC/CDKN1A/CTNNB1/RALA/FOS/GADD45A/CYCS
hsa05410	Hypertrophic cardiomyopathy (HCM)	16/759	90/8017	0.00966452	0.0729671	16	TPM2/TPM1/LMNA/ITGB5/SGCB/AGT/ITGA10/ITGA7/ITGA1/ITGB1/ITGAV/ITGA8/IGF1/TPM4/ATP2A2/ACTG1
hsa01522	Endocrine resistance	16/759	98/8017	0.0210186	0.135056	16	MMP2/NOTCH3/CCND1/MAPK10/EGFR/JAG1/PTK2/ADCY3/JUN/BAD/IGF1/AKT3/CDKN1A/SHC1/GNAS/FOS
hsa05146	Amoebiasis	16/759	102/8017	0.029566	0.17171	16	COL1A1/COL1A2/FN1/COL3A1/LAMA4/COL4A1/LAMB2/COL4A2/LAMC1/LAMB1/IL1R1/HSPB1/PTK2/PRDX1/GNAS/SERPINB6
hsa04670	Leukocyte transendothelial migration	16/759	112/8017	0.0617583	0.274279	16	CXCL12/MYL9/VCAM1/MMP2/THY1/JAM3/PTK2/CD99/ITGB1/AFDN/ROCK2/CTNNA1/CTNND1/CTNNB1/ARHGAP5/ACTG1
hsa04514	Cell adhesion molecules (CAMs)	16/759	147/8017	0.315828	0.794834	16	VCAM1/NCAM1/SDC2/NEO1/JAM3/CD276/NRXN2/CADM1/SDC4/CD99/VCAN/ITGB1/ITGAV/NECTIN2/ITGA8/MPZL1
hsa03040	Spliceosome	16/759	149/8017	0.33561	0.817713	16	HSPA1B/HSPA1A/SNRNP70/SNRPE/HSPA8/SF3B6/HNRNPA1/SNRPD1/LSM2/LSM3/SNRPF/SNRPD2/LSM5/SRSF7/SNU13/TXNL4A
hsa03013	RNA transport	16/759	179/8017	0.634615	1	16	EIF4A1/EIF4A2/RAN/EEF1A1/PHAX/SAP18/EIF3I/EIF3G/EIF5B/EIF2B1/SUMO2/EIF1AX/EIF2S2/EIF3B/EIF3D/EIF4EBP1
hsa04621	NOD-like receptor signaling pathway	16/759	181/8017	0.652508	1	16	MAPK10/ANTXR1/TRIP6/CCL2/JUN/YWHAE/HSP90AB1/CTSB/VDAC2/IFI16/VDAC1/SUGT1/HSP90AA1/TXNIP/TXN2/VDAC3
hsa05218	Melanoma	15/759	72/8017	0.00260947	0.0254212	15	FGFR1/PDGFRB/FGF7/PDGFRA/CCND1/PDGFA/EGFR/PDGFC/GADD45B/PDGFD/BAD/IGF1/AKT3/CDKN1A/GADD45A
hsa01521	EGFR tyrosine kinase inhibitor resistance	15/759	79/8017	0.0065373	0.0533585	15	PDGFRB/GAS6/PDGFRA/AXL/PDGFA/FGFR3/EGFR/PDGFC/PDGFD/BAD/IGF1/AKT3/SHC1/VEGFA/EIF4EBP1
hsa05231	Choline metabolism in cancer	15/759	98/8017	0.0416105	0.214152	15	PDGFRB/PDGFRA/PLPP3/MAPK10/PDGFA/WASF3/EGFR/PLPP1/PDGFC/PDGFD/JUN/AKT3/RHEB/FOS/EIF4EBP1
hsa04928	Parathyroid hormone synthesis, secretion and action	15/759	106/8017	0.0736237	0.30458	15	BGLAP/FGFR1/PTH1R/MMP14/EGFR/MAFB/RUNX2/EGR1/ADCY3/CDKN1A/MEF2C/GNAS/MEF2A/NACA/FOS
hsa01200	Carbon metabolism	15/759	117/8017	0.139012	0.479748	15	GCSH/ESD/PHGDH/ADH5/SDHD/TPI1/MDH1/ECHS1/MDH2/PKM/PFKP/PGAM1/HADHA/IDH3G/ENO1
hsa04934	Cushing syndrome	15/759	155/8017	0.504794	0.964524	15	RASD1/CCND1/AGT/FZD8/EGFR/TCF7L1/PBX1/TCF7L2/ADCY3/CAMK2D/CDKN1A/CTNNB1/GNAS/NR4A1/AHR
hsa04217	Necroptosis	15/759	162/8017	0.576495	1	15	MAPK10/CAMK2D/HSP90AB1/TNFRSF1A/H2AFJ/CHMP5/CAPN2/VDAC2/VDAC1/SLC25A6/SQSTM1/HSP90AA1/PPIA/VDAC3/SLC25A5
hsa04630	JAK-STAT signaling pathway	15/759	162/8017	0.576495	1	15	LEPR/PDGFRB/PDGFRA/FHL1/CCND1/LIFR/OSMR/GHR/PDGFA/EGFR/IL6ST/SOCS3/AKT3/MYC/CDKN1A
hsa04260	Cardiac muscle contraction	14/759	86/8017	0.030328	0.171809	14	TPM2/TPM1/COX7A1/ASPH/TPM4/COX6C/ATP2A2/UQCRQ/ATP1A1/COX6A1/CYC1/COX7C/UQCRH/UQCRB
hsa04380	Osteoclast differentiation	14/759	128/8017	0.325248	0.811777	14	CTSK/CSF1/MAPK10/TNFRSF11B/IL1R1/SOCS3/FHL2/JUN/TNFRSF1A/AKT3/FOSB/SQSTM1/JUNB/FOS
hsa04140	Autophagy - animal	14/759	137/8017	0.423308	0.913135	14	RRAS/CTSL/MAPK10/MRAS/BNIP3/PPP2CB/BAD/AKT3/RRAGA/CTSB/RHEB/SQSTM1/ATG101/DDIT4
hsa05226	Gastric cancer	14/759	149/8017	0.553671	1	14	FGF7/CCND1/FZD8/EGFR/TCF7L1/TCF7L2/GADD45B/CTNNA1/AKT3/MYC/CDKN1A/SHC1/CTNNB1/GADD45A
hsa05160	Hepatitis C	14/759	155/8017	0.614991	1	14	CCND1/EGFR/CD81/SOCS3/YWHAE/TNFRSF1A/PPP2CB/BAD/AKT3/MYC/YWHAQ/CDKN1A/CTNNB1/CYCS
hsa05203	Viral carcinogenesis	14/759	201/8017	0.916349	1	14	CCND1/SCIN/IL6ST/LTBR/GSN/JUN/YWHAE/BAD/YWHAQ/CDKN1A/RANBP1/PKM/PSMC1/VDAC3
hsa05213	Endometrial cancer	13/759	58/8017	0.00250718	0.025239	13	CCND1/EGFR/TCF7L1/TCF7L2/GADD45B/CTNNA1/ILK/BAD/AKT3/MYC/CDKN1A/CTNNB1/GADD45A
hsa05214	Glioma	13/759	75/8017	0.0226433	0.142464	13	PDGFRB/PDGFRA/CCND1/PDGFA/EGFR/GADD45B/CAMK2D/IGF1/AKT3/CDKN1A/SHC1/CALM2/GADD45A
hsa04012	ErbB signaling pathway	13/759	85/8017	0.0555824	0.254332	13	MAPK10/EGFR/PTK2/JUN/CAMK2D/BAD/AKT3/MYC/CDKN1A/SHC1/ABL2/CBLB/EIF4EBP1
hsa05145	Toxoplasmosis	13/759	112/8017	0.260128	0.71417	13	LAMA4/LAMB2/MAPK10/LAMC1/LAMB1/HSPA1B/ITGB1/TNFRSF1A/BAD/AKT3/HSPA1A/HSPA8/CYCS
hsa04935	Growth hormone synthesis, secretion and action	13/759	119/8017	0.33575	0.817713	13	MAPK10/GHR/SSTR2/IGFBP3/PTK2/SOCS3/ADCY3/IGF1/AKT3/SHC1/GNAS/JUNB/FOS
hsa05135	Yersinia infection	13/759	120/8017	0.346949	0.838228	13	FN1/MAPK10/DOCK1/PTK2/ITGB1/CCL2/WASL/JUN/ROCK2/ARHGEF12/AKT3/FOS/ACTG1
hsa04611	Platelet activation	13/759	124/8017	0.392331	0.884209	13	COL1A1/COL1A2/COL3A1/PRKG1/MYLK/ITGB1/ADCY3/ROCK2/GUCY1A1/ARHGEF12/AKT3/GNAS/ACTG1
hsa04068	FoxO signaling pathway	13/759	131/8017	0.47248	0.951261	13	CCND1/MAPK10/EGFR/GADD45B/BNIP3/FBXO32/IGF1/AKT3/SETD7/CDKN1A/PRMT1/KLF2/GADD45A
hsa04261	Adrenergic signaling in cardiomyocytes	13/759	149/8017	0.664085	1	13	TPM2/TPM1/AGT/PLN/ADCY3/CAMK2D/PPP2CB/AKT3/TPM4/GNAS/CALM2/ATP2A2/ATP1A1
hsa05152	Tuberculosis	13/759	180/8017	0.88204	1	13	MRC2/MAPK10/PLA2R1/EEA1/CAMK2D/TNFRSF1A/ARHGEF12/BAD/AKT3/SPHK1/CALM2/HSPD1/CYCS
hsa00010	Glycolysis / Gluconeogenesis	12/759	68/8017	0.024514	0.151086	12	ALDH1A3/ALDH7A1/ADH5/ALDH2/LDHA/TPI1/LDHB/PKM/PFKP/AKR1A1/PGAM1/ENO1
hsa05230	Central carbon metabolism in cancer	12/759	69/8017	0.0272177	0.161171	12	FGFR1/PDGFRB/PDGFRA/FGFR3/EGFR/AKT3/MYC/LDHA/LDHB/PKM/PFKP/PGAM1
hsa04668	TNF signaling pathway	12/759	112/8017	0.370581	0.858175	12	VCAM1/MMP14/CSF1/MAPK10/JAG1/SOCS3/CCL2/JUN/TNFRSF1A/AKT3/JUNB/FOS
hsa04722	Neurotrophin signaling pathway	12/759	119/8017	0.454154	0.944888	12	BEX3/NTRK2/NGFR/MAPK10/MAGED1/JUN/CAMK2D/YWHAE/BAD/AKT3/SHC1/CALM2
hsa05162	Measles	12/759	138/8017	0.665596	1	12	CCND1/MAPK10/HSPA1B/JUN/BAD/AKT3/HSPA1A/RACK1/CBLB/HSPA8/FOS/CYCS
hsa05168	Herpes simplex virus 1 infection	12/759	491/8017	1	1	12	SOCS3/CCL2/TNFRSF1A/BAD/AKT3/CALR/PDIA3/RHEB/EIF2B1/SRSF7/EIF4EBP1/CYCS
hsa04612	Antigen processing and presentation	11/759	78/8017	0.11611	0.417442	11	CTSL/HSPA1B/HSP90AB1/HSPA1A/CALR/CTSB/PDIA3/HSP90AA1/HSPA8/HSPA5/PSME2
hsa04666	Fc gamma R-mediated phagocytosis	11/759	93/8017	0.26307	0.715739	11	PLPP3/WASF3/SCIN/PLPP1/MYO10/GSN/CFL2/AKT3/ARPC1A/SPHK1/MARCKS
hsa04142	Lysosome	11/759	123/8017	0.625008	1	11	CTSK/CTSL/CTSF/LAPTM4A/CD63/LAPTM4B/SCARB2/CTSB/CLTA/AP1S1/HEXB
hsa04110	Cell cycle	11/759	124/8017	0.635889	1	11	CDKN1C/CCND1/GADD45B/YWHAE/MYC/YWHAQ/CDKN1A/SKP1/ANAPC11/CDC26/GADD45A
hsa05161	Hepatitis B	11/759	162/8017	0.910458	1	11	HSPG2/MAPK10/JUN/BAD/AKT3/MYC/YWHAQ/CDKN1A/VDAC3/FOS/CYCS
hsa04062	Chemokine signaling pathway	11/759	189/8017	0.97505	1	11	CXCL12/GNG12/GNG11/PARD3/PTK2/CCL2/ADCY3/ROCK2/BAD/AKT3/SHC1
hsa04080	Neuroactive ligand-receptor interaction	11/759	340/8017	0.999998	1	11	LEPR/PTH1R/AGT/GHR/SSTR2/EDNRA/PTGFR/PARD3/S1PR3/THRA/NMB
hsa00270	Cysteine and methionine metabolism	10/759	49/8017	0.0148761	0.104478	10	CDO1/PHGDH/ADI1/BCAT1/AHCYL1/LDHA/MDH1/SRM/MDH2/LDHB
hsa05110	Vibrio cholerae infection	10/759	50/8017	0.0170693	0.114554	10	TJP1/KDELR3/ADCY3/KDELR2/KDELR1/GNAS/SEC61G/PDIA4/SEC61B/ACTG1
hsa04978	Mineral absorption	10/759	58/8017	0.0438927	0.217305	10	MT2A/MT1E/MT1M/TF/CYBRD1/MT1A/STEAP1/MT1X/MT1F/ATP1A1
hsa04137	Mitophagy - animal	10/759	65/8017	0.083547	0.33199	10	RRAS/MAPK10/MRAS/BNIP3/JUN/FIS1/OPTN/SQSTM1/UBB/TOMM7
hsa04115	p53 signaling pathway	10/759	72/8017	0.139794	0.479748	10	CCND1/IGFBP3/THBS1/GADD45B/IGF1/CDKN1A/EI24/SIVA1/GADD45A/CYCS
hsa00980	Metabolism of xenobiotics by cytochrome P450	10/759	76/8017	0.179009	0.551639	10	CYP1B1/EPHX1/GSTM3/AKR1C1/ALDH1A3/MGST3/CBR1/GSTP1/ADH5/GSTO1
hsa05212	Pancreatic cancer	10/759	76/8017	0.179009	0.551639	10	CCND1/MAPK10/EGFR/GADD45B/BAD/AKT3/CDKN1A/RALA/VEGFA/GADD45A
hsa00983	Drug metabolism - other enzymes	10/759	79/8017	0.211392	0.632082	10	GSTM3/NME3/MGST3/NME4/GSTP1/CES1/NME1/GSTO1/CMPK1/IMPDH2
hsa05204	Chemical carcinogenesis	10/759	82/8017	0.245968	0.694227	10	CYP1B1/EPHX1/GSTM3/AKR1C2/ALDH1A3/MGST3/CBR1/GSTP1/ADH5/GSTO1
hsa04610	Complement and coagulation cascades	10/759	85/8017	0.282367	0.754644	10	CLU/CFH/SERPING1/C1R/C1S/TFPI/A2M/PROCR/CFD/CD59
hsa04912	GnRH signaling pathway	10/759	93/8017	0.385218	0.879831	10	MMP2/MMP14/MAPK10/EGFR/EGR1/ADCY3/JUN/CAMK2D/GNAS/CALM2
hsa04713	Circadian entrainment	10/759	97/8017	0.437932	0.924864	10	RASD1/GNG12/GNG11/PRKG1/ADCY3/CAMK2D/GUCY1A1/GNAS/CALM2/FOS
hsa04922	Glucagon signaling pathway	10/759	106/8017	0.553781	1	10	CAMK2D/AKT3/PRMT1/LDHA/GNAS/CALM2/LDHB/PKM/PFKP/PGAM1
hsa04152	AMPK signaling pathway	10/759	120/8017	0.711065	1	10	LEPR/CCND1/PPP2CB/IGF1/AKT3/EEF2/RAB2A/RHEB/PFKP/EIF4EBP1
hsa04114	Oocyte meiosis	10/759	128/8017	0.783019	1	10	ADCY3/CAMK2D/YWHAE/PPP2CB/IGF1/YWHAQ/SKP1/ANAPC11/CALM2/CDC26
hsa04728	Dopaminergic synapse	10/759	132/8017	0.813766	1	10	GNG12/GNG11/MAPK10/COMT/CAMK2D/PPP2CB/AKT3/GNAS/CALM2/FOS
hsa04120	Ubiquitin mediated proteolysis	10/759	136/8017	0.841127	1	10	SOCS3/UBE2E3/SKP1/ANAPC11/RNF7/STUB1/ELOC/UBA2/CBLB/CDC26
hsa05164	Influenza A	10/759	170/8017	0.966858	1	10	SOCS3/CCL2/TNFRSF1A/AKT3/VDAC1/SLC25A6/FDPS/SLC25A5/CYCS/ACTG1
hsa05216	Thyroid cancer	9/759	37/8017	0.00639187	0.0533585	9	CCND1/TCF7L1/TCF7L2/GADD45B/MYC/CDKN1A/CTNNB1/TFG/GADD45A
hsa00620	Pyruvate metabolism	9/759	39/8017	0.0091792	0.07108	9	ALDH7A1/ALDH2/LDHA/GLO1/GRHPR/MDH1/MDH2/LDHB/PKM
hsa04979	Cholesterol metabolism	9/759	50/8017	0.0428102	0.215478	9	APOE/ANGPTL4/LRP1/LPL/PLTP/LRPAP1/VDAC2/VDAC1/VDAC3
hsa00480	Glutathione metabolism	9/759	56/8017	0.0784836	0.317578	9	GGT5/GPX3/GPX8/GSTM3/MGST3/GPX4/GSTP1/SRM/GSTO1
hsa00590	Arachidonic acid metabolism	9/759	63/8017	0.137718	0.479748	9	PLA2G2A/GGT5/PTGDS/GPX3/GPX8/PTGIS/AKR1C3/CBR1/PTGES3
hsa01524	Platinum drug resistance	9/759	73/8017	0.251441	0.696653	9	GSTM3/MGST3/BAD/AKT3/CDKN1A/GSTP1/GSTO1/ERCC1/CYCS
hsa05133	Pertussis	9/759	76/8017	0.290494	0.761356	9	SERPING1/C1R/C1S/MAPK10/ITGB1/JUN/CFL2/CALM2/FOS
hsa03018	RNA degradation	9/759	79/8017	0.330983	0.817713	9	TOB2/HSPD1/TOB1/BTG3/PFKP/LSM2/LSM3/LSM5/ENO1
hsa05323	Rheumatoid arthritis	9/759	93/8017	0.524331	0.977649	9	CXCL12/CTSK/CTSL/CSF1/ANGPT1/CCL2/JUN/VEGFA/FOS
hsa04916	Melanogenesis	9/759	101/8017	0.626521	1	9	FZD8/KITLG/TCF7L1/TCF7L2/ADCY3/CAMK2D/CTNNB1/GNAS/CALM2
hsa05142	Chagas disease (American trypanosomiasis)	9/759	102/8017	0.63846	1	9	MAPK10/CCL2/JUN/TNFRSF1A/PPP2CB/AKT3/CALR/GNAS/FOS
hsa04910	Insulin signaling pathway	9/759	137/8017	0.911863	1	9	MAPK10/SOCS3/BAD/AKT3/SHC1/RHEB/CALM2/CBLB/EIF4EBP1
hsa05034	Alcoholism	9/759	184/8017	0.993007	1	9	NTRK2/GNG12/GNG11/SLC29A1/H2AFJ/SHC1/FOSB/GNAS/CALM2
hsa05219	Bladder cancer	8/759	41/8017	0.0357826	0.19146	8	MMP2/CCND1/FGFR3/EGFR/THBS1/MYC/CDKN1A/VEGFA
hsa00071	Fatty acid degradation	8/759	44/8017	0.0517672	0.244276	8	ALDH7A1/ACADVL/ADH5/ALDH2/HADHB/ACAA2/ECHS1/HADHA
hsa04962	Vasopressin-regulated water reabsorption	8/759	44/8017	0.0517672	0.244276	8	DYNC2H1/ADCY3/DYNLL1/DYNC1I2/DYNC1LI2/GNAS/DCTN2/DCTN6
hsa00330	Arginine and proline metabolism	8/759	50/8017	0.0958172	0.366289	8	CKB/ALDH7A1/P4HA2/P4HA1/SAT2/ALDH2/OAT/SRM
hsa05144	Malaria	8/759	50/8017	0.0958172	0.366289	8	LRP1/VCAM1/SDC2/THBS2/CD81/COMP/THBS1/CCL2
hsa00240	Pyrimidine metabolism	8/759	57/8017	0.167345	0.53852	8	ENPP1/NT5E/NME3/NT5C3B/NME4/DCTD/NME1/CMPK1
hsa04213	Longevity regulating pathway - multiple species	8/759	62/8017	0.229783	0.667254	8	CRYAB/HSPA1B/ADCY3/SOD1/IGF1/AKT3/HSPA1A/HSPA8
hsa05221	Acute myeloid leukemia	8/759	67/8017	0.299027	0.768369	8	CCND1/RUNX1T1/TCF7L1/TCF7L2/BAD/AKT3/MYC/EIF4EBP1
hsa00982	Drug metabolism - cytochrome P450	8/759	72/8017	0.372255	0.858175	8	FMO2/FMO3/GSTM3/ALDH1A3/MGST3/GSTP1/ADH5/GSTO1
hsa04918	Thyroid hormone synthesis	8/759	74/8017	0.402016	0.890697	8	GPX3/GPX8/ADCY3/GNAS/ATP1A1/PDIA4/HSPA5/HSP90B1
hsa01230	Biosynthesis of amino acids	8/759	75/8017	0.416908	0.912365	8	PHGDH/BCAT1/TPI1/PKM/PFKP/PGAM1/IDH3G/ENO1
hsa05220	Chronic myeloid leukemia	8/759	76/8017	0.431781	0.924807	8	CCND1/GADD45B/BAD/AKT3/MYC/CDKN1A/SHC1/GADD45A
hsa04970	Salivary secretion	8/759	90/8017	0.627983	1	8	KCNMA1/PRKG1/CST3/ADCY3/GUCY1A1/GNAS/CALM2/ATP1A1
hsa04657	IL-17 signaling pathway	8/759	94/8017	0.676886	1	8	MAPK10/CCL2/JUN/HSP90AB1/FOSB/HSP90AA1/HSP90B1/FOS
hsa04914	Progesterone-mediated oocyte maturation	8/759	99/8017	0.732156	1	8	MAPK10/ADCY3/HSP90AB1/IGF1/AKT3/ANAPC11/HSP90AA1/CDC26
hsa04625	C-type lectin receptor signaling pathway	8/759	104/8017	0.78063	1	8	RRAS/MAPK10/MRAS/JUN/ARHGEF12/AKT3/CALM2/CBLB
hsa04659	Th17 cell differentiation	8/759	107/8017	0.806459	1	8	MAPK10/IL1R1/IL6ST/JUN/HSP90AB1/HSP90AA1/FOS/AHR
hsa04150	mTOR signaling pathway	8/759	153/8017	0.981384	1	8	FZD8/TNFRSF1A/IGF1/AKT3/RRAGA/RHEB/DDIT4/EIF4EBP1
hsa03060	Protein export	7/759	23/8017	0.00419885	0.0396267	7	SEC61G/SEC11A/SRP14/SPCS1/SPCS2/HSPA5/SEC61B
hsa04216	Ferroptosis	7/759	40/8017	0.0788686	0.317578	7	CP/TF/SLC39A14/GPX4/SAT2/VDAC2/VDAC3
hsa00280	Valine, leucine and isoleucine degradation	7/759	48/8017	0.164362	0.53852	7	ALDH7A1/ALDH2/BCAT1/HADHB/ACAA2/ECHS1/HADHA
hsa05014	Amyotrophic lateral sclerosis (ALS)	7/759	57/8017	0.292441	0.761356	7	GPX3/GPX8/SOD1/TNFRSF1A/BAD/CCS/CYCS
hsa05134	Legionellosis	7/759	57/8017	0.292441	0.761356	7	HSPA1B/BNIP3/HSPA1A/EEF1A1/HSPD1/HSPA8/CYCS
hsa00561	Glycerolipid metabolism	7/759	61/8017	0.355448	0.845239	7	PLPP3/LPL/ALDH7A1/PLPP1/MGLL/ALDH2/AKR1A1
hsa05217	Basal cell carcinoma	7/759	63/8017	0.387475	0.879831	7	FZD8/TCF7L1/TCF7L2/GADD45B/CDKN1A/CTNNB1/GADD45A
hsa05223	Non-small cell lung cancer	7/759	66/8017	0.435544	0.924864	7	CCND1/EGFR/GADD45B/BAD/AKT3/CDKN1A/GADD45A
hsa04924	Renin secretion	7/759	69/8017	0.483039	0.953449	7	AGT/EDNRA/KCNMA1/GUCY1A1/CTSB/GNAS/CALM2
hsa05211	Renal cell carcinoma	7/759	69/8017	0.483039	0.953449	7	EPAS1/JUN/BAD/AKT3/CDKN1A/ELOC/VEGFA
hsa04971	Gastric acid secretion	7/759	75/8017	0.573977	1	7	SSTR2/MYLK/ADCY3/CAMK2D/GNAS/CALM2/ATP1A1
hsa04925	Aldosterone synthesis and secretion	7/759	98/8017	0.832369	1	7	AGT/ADCY3/CAMK2D/GNAS/NR4A1/CALM2/ATP1A1
hsa04061	Viral protein interaction with cytokine and cytokine receptor	7/759	100/8017	0.847339	1	7	CXCL12/ACKR3/CSF1/IL6ST/LTBR/CCL2/TNFRSF1A
hsa04750	Inflammatory mediator regulation of TRP channels	7/759	100/8017	0.847339	1	7	MAPK10/IL1R1/ADCY3/CAMK2D/IGF1/GNAS/CALM2
hsa04071	Sphingolipid signaling pathway	7/759	119/8017	0.942125	1	7	MAPK10/S1PR3/ROCK2/TNFRSF1A/PPP2CB/AKT3/SPHK1
hsa04392	Hippo signaling pathway - multiple species	6/759	29/8017	0.0508107	0.244276	6	FRMD6/WWTR1/YAP1/WTIP/TEAD1/SAV1
hsa00410	beta-Alanine metabolism	6/759	31/8017	0.0671527	0.285635	6	ALDH1A3/ALDH7A1/AOC3/ALDH2/ECHS1/HADHA
hsa03020	RNA polymerase	6/759	31/8017	0.0671527	0.285635	6	POLR2F/POLR2H/POLR2E/POLR2I/POLR2L/POLR2K
hsa05020	Prion diseases	6/759	35/8017	0.107923	0.397471	6	NCAM1/LAMC1/EGR1/SOD1/HSPA1A/HSPA5
hsa00260	Glycine, serine and threonine metabolism	6/759	40/8017	0.172841	0.549452	6	ALDH7A1/AOC3/GCSH/PHGDH/GRHPR/PGAM1
hsa00520	Amino sugar and nucleotide sugar metabolism	6/759	48/8017	0.300224	0.768369	6	GMDS/GFPT2/UGDH/CYB5R3/PGM3/HEXB
hsa01212	Fatty acid metabolism	6/759	57/8017	0.4568	0.944888	6	HACD3/ACADVL/HADHB/ACAA2/ECHS1/HADHA
hsa04370	VEGF signaling pathway	6/759	59/8017	0.490983	0.956626	6	HSPB1/PTK2/BAD/AKT3/SPHK1/VEGFA
hsa05416	Viral myocarditis	6/759	60/8017	0.507813	0.964524	6	CAV1/SGCB/CCND1/ABL2/CYCS/ACTG1
hsa00310	Lysine degradation	6/759	61/8017	0.524434	0.977649	6	PLOD2/ALDH7A1/SETD7/ALDH2/ECHS1/HADHA
hsa05031	Amphetamine addiction	6/759	69/8017	0.64766	1	6	JUN/CAMK2D/FOSB/GNAS/CALM2/FOS
hsa04917	Prolactin signaling pathway	6/759	70/8017	0.661631	1	6	CCND1/MAPK10/SOCS3/AKT3/SHC1/FOS
hsa03320	PPAR signaling pathway	6/759	76/8017	0.737932	1	6	ANGPTL4/LPL/PLTP/ILK/DBI/PLIN2
hsa04211	Longevity regulating pathway	6/759	89/8017	0.859177	1	6	ADCY3/IGF1/AKT3/RHEB/ATG101/EIF4EBP1
hsa04658	Th1 and Th2 cell differentiation	6/759	92/8017	0.879392	1	6	NOTCH3/MAPK10/JAG1/JUN/MAML2/FOS
hsa04640	Hematopoietic cell lineage	6/759	99/8017	0.917238	1	6	CSF1/KITLG/IL1R1/CD9/ITGA1/CD59
hsa04064	NF-kappa B signaling pathway	6/759	102/8017	0.929995	1	6	CXCL12/VCAM1/IL1R1/LTBR/GADD45B/TNFRSF1A
hsa04972	Pancreatic secretion	6/759	102/8017	0.929995	1	6	PLA2G2A/KCNMA1/ADCY3/GNAS/ATP2A2/ATP1A1
hsa04620	Toll-like receptor signaling pathway	6/759	104/8017	0.937505	1	6	CTSK/MAPK10/JUN/SPP1/AKT3/FOS
hsa03008	Ribosome biogenesis in eukaryotes	6/759	105/8017	0.940985	1	6	REXO2/SBDS/RAN/EIF6/NHP2/SNU13
hsa04931	Insulin resistance	6/759	108/8017	0.950411	1	6	AGT/MAPK10/GFPT2/SOCS3/TNFRSF1A/AKT3
hsa04725	Cholinergic synapse	6/759	112/8017	0.960868	1	6	GNG12/GNG11/ADCY3/CAMK2D/AKT3/FOS
hsa00062	Fatty acid elongation	5/759	27/8017	0.105931	0.395215	5	HACD3/HADHB/ACAA2/ECHS1/HADHA
hsa00630	Glyoxylate and dicarboxylate metabolism	5/759	30/8017	0.148798	0.504912	5	GCSH/HYI/GRHPR/MDH1/MDH2
hsa00350	Tyrosine metabolism	5/759	36/8017	0.251266	0.696653	5	ALDH1A3/AOC3/COMT/MIF/ADH5
hsa00380	Tryptophan metabolism	5/759	42/8017	0.366071	0.857003	5	CYP1B1/ALDH7A1/ALDH2/ECHS1/HADHA
hsa00565	Ether lipid metabolism	5/759	47/8017	0.462753	0.948096	5	PLA2G2A/PLPP3/ENPP2/PLPP1/PLD3
hsa04913	Ovarian steroidogenesis	5/759	51/8017	0.536829	0.994615	5	CYP1B1/ADCY3/IGF1/AKR1C3/GNAS
hsa04330	Notch signaling pathway	5/759	53/8017	0.572068	1	5	HES1/NOTCH3/HEY2/JAG1/MAML2
hsa04961	Endocrine and other factor-regulated calcium reabsorption	5/759	53/8017	0.572068	1	5	PTH1R/GNAS/CLTA/ATP1A1/AP2M1
hsa04923	Regulation of lipolysis in adipocytes	5/759	55/8017	0.605859	1	5	PRKG1/ADCY3/MGLL/AKT3/GNAS
hsa00140	Steroid hormone biosynthesis	5/759	60/8017	0.683221	1	5	CYP1B1/AKR1C1/AKR1C2/COMT/AKR1C3
hsa04730	Long-term depression	5/759	60/8017	0.683221	1	5	PRKG1/PPP2CB/GUCY1A1/IGF1/GNAS
hsa04623	Cytosolic DNA-sensing pathway	5/759	63/8017	0.724422	1	5	POLR2F/POLR2H/POLR2E/POLR2L/POLR2K
hsa04927	Cortisol synthesis and secretion	5/759	65/8017	0.749671	1	5	AGT/PBX1/ADCY3/GNAS/NR4A1
hsa04920	Adipocytokine signaling pathway	5/759	69/8017	0.79493	1	5	LEPR/MAPK10/SOCS3/TNFRSF1A/AKT3
hsa05120	Epithelial cell signaling in Helicobacter pylori infection	5/759	70/8017	0.805184	1	5	TJP1/MAPK10/EGFR/JAM3/JUN
hsa04662	B cell receptor signaling pathway	5/759	82/8017	0.898884	1	5	CD81/JUN/AKT3/IFITM1/FOS
hsa04911	Insulin secretion	5/759	86/8017	0.919936	1	5	KCNMA1/ADCY3/CAMK2D/GNAS/ATP1A1
hsa05150	Staphylococcus aureus infection	5/759	96/8017	0.956557	1	5	CFH/C1R/C1S/CFD/KRT10
hsa05017	Spinocerebellar ataxia	5/759	98/8017	0.961724	1	5	MAPK10/AKT3/ATP2A2/ATG101/ATXN10
hsa04660	T cell receptor signaling pathway	5/759	104/8017	0.974026	1	5	MAPK10/JUN/AKT3/CBLB/FOS
hsa04724	Glutamatergic synapse	5/759	114/8017	0.986711	1	5	GNG12/GNG11/ADCY3/SLC1A3/GNAS
hsa05322	Systemic lupus erythematosus	5/759	133/8017	0.996531	1	5	C1R/C1S/H2AFJ/SSB/SNRPD1
hsa00340	Histidine metabolism	4/759	23/8017	0.167619	0.53852	4	HNMT/ALDH1A3/ALDH7A1/ALDH2
hsa00790	Folate biosynthesis	4/759	26/8017	0.227976	0.667254	4	ALPL/AKR1C3/CBR1/PTS
hsa00020	Citrate cycle (TCA cycle)	4/759	30/8017	0.314897	0.794834	4	SDHD/MDH1/MDH2/IDH3G
hsa04215	Apoptosis - multiple species	4/759	32/8017	0.359515	0.84823	4	NGFR/MAPK10/TNFRSF1A/CYCS
hsa00640	Propanoate metabolism	4/759	34/8017	0.404058	0.890697	4	LDHA/ECHS1/LDHB/HADHA
hsa00760	Nicotinate and nicotinamide metabolism	4/759	37/8017	0.469578	0.951261	4	NNMT/ENPP1/NT5E/NT5C3B
hsa00600	Sphingolipid metabolism	4/759	47/8017	0.662253	1	4	PLPP3/PLPP1/KDSR/SPHK1
hsa04340	Hedgehog signaling pathway	4/759	50/8017	0.709813	1	4	CCND1/GAS1/BOC/SPOP
hsa04976	Bile secretion	4/759	72/8017	0.919682	1	4	EPHX1/ADCY3/GNAS/ATP1A1
hsa05140	Leishmaniasis	4/759	77/8017	0.941977	1	4	ITGB1/JUN/EEF1A1/FOS
hsa04721	Synaptic vesicle cycle	4/759	78/8017	0.945695	1	4	STXBP1/SLC1A3/CLTA/AP2M1
hsa05235	PD-L1 expression and PD-1 checkpoint pathway in cancer	4/759	89/8017	0.974397	1	4	EGFR/JUN/AKT3/FOS
hsa05032	Morphine addiction	4/759	91/8017	0.977762	1	4	GNG12/GNG11/ADCY3/GNAS
hsa00564	Glycerophospholipid metabolism	4/759	98/8017	0.986543	1	4	PLA2G2A/PLPP3/PLPP1/PLD3
hsa04726	Serotonergic synapse	4/759	115/8017	0.996224	1	4	GNG12/GNG11/APP/GNAS
hsa04740	Olfactory transduction	4/759	448/8017	1	1	4	PRKG1/ADCY3/CAMK2D/CALM2
hsa00920	Sulfur metabolism	3/759	10/8017	0.0612056	0.274279	3	SELENBP1/PAPSS2/PAPSS1
hsa00360	Phenylalanine metabolism	3/759	17/8017	0.213526	0.632205	3	ALDH1A3/AOC3/MIF
hsa00053	Ascorbate and aldarate metabolism	3/759	27/8017	0.477719	0.953449	3	ALDH7A1/UGDH/ALDH2
hsa00650	Butanoate metabolism	3/759	28/8017	0.502547	0.964524	3	BDH2/ECHS1/HADHA
hsa00051	Fructose and mannose metabolism	3/759	33/8017	0.616565	1	3	GMDS/TPI1/PFKP
hsa04960	Aldosterone-regulated sodium reabsorption	3/759	37/8017	0.69411	1	3	SLC9A3R2/IGF1/ATP1A1
hsa00513	Various types of N-glycan biosynthesis	3/759	39/8017	0.72818	1	3	TUSC3/DAD1/HEXB
hsa03440	Homologous recombination	3/759	41/8017	0.759201	1	3	SEM1/POLD2/SSBP1
hsa04975	Fat digestion and absorption	3/759	41/8017	0.759201	1	3	PLA2G2A/PLPP3/PLPP1
hsa04930	Type II diabetes mellitus	3/759	46/8017	0.824293	1	3	MAPK10/SOCS3/PKM
hsa03420	Nucleotide excision repair	3/759	47/8017	0.835341	1	3	GTF2H5/POLD2/ERCC1
hsa05030	Cocaine addiction	3/759	49/8017	0.85565	1	3	JUN/FOSB/GNAS
hsa00510	N-Glycan biosynthesis	3/759	50/8017	0.864959	1	3	TUSC3/DAD1/DPM3
hsa03460	Fanconi anemia pathway	3/759	54/8017	0.897106	1	3	HES1/ERCC1/CENPX
hsa00830	Retinol metabolism	3/759	67/8017	0.959509	1	3	DHRS3/DHRS4L2/ADH5
hsa00562	Inositol phosphate metabolism	3/759	74/8017	0.976106	1	3	ISYNA1/MTMR2/TPI1
hsa04146	Peroxisome	3/759	83/8017	0.988121	1	3	PRDX1/SOD1/ECH1
hsa04727	GABAergic synapse	3/759	89/8017	0.992628	1	3	GNG12/GNG11/ADCY3
hsa00430	Taurine and hypotaurine metabolism	2/759	11/8017	0.279943	0.754644	2	GGT5/CDO1
hsa00603	Glycosphingolipid biosynthesis - globo and isoglobo series	2/759	15/8017	0.422314	0.913135	2	A4GALT/HEXB
hsa00730	Thiamine metabolism	2/759	16/8017	0.455757	0.944888	2	ALPL/AK1
hsa00450	Selenocompound metabolism	2/759	17/8017	0.488055	0.956626	2	PAPSS2/PAPSS1
hsa01210	2-Oxocarboxylic acid metabolism	2/759	18/8017	0.519124	0.977649	2	BCAT1/IDH3G
hsa00770	Pantothenate and CoA biosynthesis	2/759	19/8017	0.548907	1	2	ENPP1/BCAT1
hsa00900	Terpenoid backbone biosynthesis	2/759	22/8017	0.630278	1	2	PCYOX1/FDPS
hsa03430	Mismatch repair	2/759	23/8017	0.654732	1	2	POLD2/SSBP1
hsa04614	Renin-angiotensin system	2/759	23/8017	0.654732	1	2	AGT/ENPEP
hsa04964	Proximal tubule bicarbonate reclamation	2/759	23/8017	0.654732	1	2	MDH1/ATP1A1
hsa04710	Circadian rhythm	2/759	31/8017	0.80625	1	2	SKP1/BHLHE40
hsa04136	Autophagy - other	2/759	32/8017	0.820318	1	2	PPP2CB/ATG101
hsa03410	Base excision repair	2/759	33/8017	0.833464	1	2	MPG/POLD2
hsa00040	Pentose and glucuronate interconversions	2/759	34/8017	0.845734	1	2	UGDH/AKR1A1
hsa03030	DNA replication	2/759	36/8017	0.867841	1	2	POLD2/SSBP1
hsa05143	African trypanosomiasis	2/759	37/8017	0.877769	1	2	VCAM1/LAMA4
hsa04940	Type I diabetes mellitus	2/759	43/8017	0.924204	1	2	CPE/HSPD1
hsa02010	ABC transporters	2/759	45/8017	0.935569	1	2	ABCA8/ABCA6
hsa04973	Carbohydrate digestion and absorption	2/759	47/8017	0.945306	1	2	AKT3/ATP1A1
hsa04672	Intestinal immune network for IgA production	2/759	49/8017	0.953632	1	2	CXCL12/LTBR
hsa04929	GnRH secretion	2/759	64/8017	0.987016	1	2	SPP1/AKT3
hsa04720	Long-term potentiation	2/759	67/8017	0.989994	1	2	CAMK2D/CALM2
hsa04664	Fc epsilon RI signaling pathway	2/759	68/8017	0.99083	1	2	MAPK10/AKT3
hsa03015	mRNA surveillance pathway	2/759	91/8017	0.998818	1	2	PPP2CB/SAP18
hsa04070	Phosphatidylinositol signaling system	2/759	99/8017	0.999429	1	2	MTMR2/CALM2
hsa00072	Synthesis and degradation of ketone bodies	1/759	10/8017	0.630346	1	1	BDH2
hsa00130	Ubiquinone and other terpenoid-quinone biosynthesis	1/759	11/8017	0.665386	1	1	VKORC1
hsa00604	Glycosphingolipid biosynthesis - ganglio series	1/759	15/8017	0.775363	1	1	HEXB
hsa00511	Other glycan degradation	1/759	18/8017	0.83342	1	1	HEXB
hsa00531	Glycosaminoglycan degradation	1/759	19/8017	0.849226	1	1	HEXB
hsa00532	Glycosaminoglycan biosynthesis - chondroitin sulfate / dermatan sulfate	1/759	20/8017	0.863534	1	1	CHST3
hsa00534	Glycosaminoglycan biosynthesis - heparan sulfate / heparin	1/759	24/8017	0.90843	1	1	EXT2
hsa00563	Glycosylphosphatidylinositol (GPI)-anchor biosynthesis	1/759	25/8017	0.917125	1	1	PIGP
hsa00592	alpha-Linolenic acid metabolism	1/759	25/8017	0.917125	1	1	PLA2G2A
hsa04950	Maturity onset diabetes of the young	1/759	26/8017	0.924996	1	1	HES1
hsa00601	Glycosphingolipid biosynthesis - lacto and neolacto series	1/759	27/8017	0.93212	1	1	A4GALT
hsa01040	Biosynthesis of unsaturated fatty acids	1/759	27/8017	0.93212	1	1	HACD3
hsa04744	Phototransduction	1/759	28/8017	0.938568	1	1	CALM2
hsa00591	Linoleic acid metabolism	1/759	29/8017	0.944404	1	1	PLA2G2A
hsa00030	Pentose phosphate pathway	1/759	30/8017	0.949687	1	1	PFKP
hsa00052	Galactose metabolism	1/759	31/8017	0.954468	1	1	PFKP
hsa04130	SNARE interactions in vesicular transport	1/759	33/8017	0.962712	1	1	VAMP5
hsa00250	Alanine, aspartate and glutamate metabolism	1/759	36/8017	0.972369	1	1	GFPT2
hsa00500	Starch and sucrose metabolism	1/759	36/8017	0.972369	1	1	ENPP1
hsa00860	Porphyrin and chlorophyll metabolism	1/759	42/8017	0.984832	1	1	CP
hsa03022	Basal transcription factors	1/759	45/8017	0.988764	1	1	GTF2H5
hsa05321	Inflammatory bowel disease (IBD)	1/759	65/8017	0.998485	1	1	JUN
hsa00970	Aminoacyl-tRNA biosynthesis	1/759	66/8017	0.998629	1	1	SARS
hsa04622	RIG-I-like receptor signaling pathway	1/759	70/8017	0.999083	1	1	MAPK10
hsa04650	Natural killer cell mediated cytotoxicity	1/759	131/8017	0.999998	1	1	SHC1
