# Supplementary material for: Single-cell RNA sequencing of human femoral head in vivo
Source: Aging (Albany NY). 2021 Jun 10;13(11):15595–619. doi: 10.18632/aging.203124 (PMC8221309; doi:10.18632/aging.203124)
Supplement: Supplementary Table 4 [file aging-13-203124-s005.xlsx]

## Sheet: Sheet1
Supplementary Table 4. GO enrichment analysis for top 20 genes of gene network.
ID	Description	GeneRatio	BgRatio	pvalue	p.adjust	qvalue	geneID	Count
GO:0043687	post-translational protein modification	16/19	360/17913	4.66345e-25	4.29037e-22	2.4299e-22	TIMP1/FSTL1/GAS6/MFGE8/TNC/PRSS23/MXRA8/IGFBP5/CP/LGALS1/IGFBP4/IGFBP7/FN1/SPARCL1/FBN1/APOE	16
GO:0043062	extracellular structure organization	9/19	387/17913	7.13455e-11	3.28189e-08	1.85874e-08	TIMP1/GAS6/BGN/TNC/COL1A2/COL1A1/FN1/FBN1/APOE	9
GO:0030198	extracellular matrix organization	8/19	334/17913	8.49479e-10	2.60507e-07	1.47541e-07	TIMP1/GAS6/BGN/TNC/COL1A2/COL1A1/FN1/FBN1	8
GO:0001558	regulation of cell growth	5/19	396/17913	4.63539e-05	0.0071076	0.00402547	IGFBP5/IGFBP4/IGFBP7/FN1/APOE	5
GO:0016049	cell growth	5/19	466/17913	0.000100264	0.00838573	0.00474935	IGFBP5/IGFBP4/IGFBP7/FN1/APOE	5
GO:0031667	response to nutrient levels	5/19	466/17913	0.000100264	0.00838573	0.00474935	FSTL1/GAS6/TNC/COL1A1/APOE	5
GO:0009991	response to extracellular stimulus	5/19	498/17913	0.00013702	0.00969682	0.00549191	FSTL1/GAS6/TNC/COL1A1/APOE	5
GO:0030168	platelet activation	4/19	152/17913	1.7491e-05	0.00321834	0.00182274	GAS6/COL1A2/COL1A1/APOE	4
GO:0031589	cell-substrate adhesion	4/19	322/17913	0.000320867	0.0140241	0.00794273	GAS6/LGALS1/COL1A1/FN1	4
GO:0001101	response to acid chemical	4/19	330/17913	0.000352219	0.0140241	0.00794273	TNC/COL1A2/COL1A1/IGFBP7	4
GO:0007596	blood coagulation	4/19	331/17913	0.000356288	0.0140241	0.00794273	GAS6/COL1A2/COL1A1/APOE	4
GO:0007599	hemostasis	4/19	336/17913	0.000377138	0.0140241	0.00794273	GAS6/COL1A2/COL1A1/APOE	4
GO:0050817	coagulation	4/19	337/17913	0.000381411	0.0140241	0.00794273	GAS6/COL1A2/COL1A1/APOE	4
GO:0001503	ossification	4/19	388/17913	0.00064906	0.0188952	0.0107015	TNC/IGFBP5/COL1A2/COL1A1	4
GO:0043434	response to peptide hormone	4/19	404/17913	0.000755199	0.019851	0.0112428	TIMP1/IGFBP5/COL1A1/FBN1	4
GO:0050900	leukocyte migration	4/19	467/17913	0.0012948	0.0264491	0.0149797	GAS6/COL1A2/COL1A1/FN1	4
GO:0001501	skeletal system development	4/19	479/17913	0.00142199	0.0264491	0.0149797	TIMP1/COL1A2/COL1A1/FBN1	4
GO:1901652	response to peptide	4/19	491/17913	0.00155774	0.0264491	0.0149797	TIMP1/IGFBP5/COL1A1/FBN1	4
GO:0050878	regulation of body fluid levels	4/19	499/17913	0.00165313	0.0264491	0.0149797	GAS6/COL1A2/COL1A1/APOE	4
GO:0071295	cellular response to vitamin	3/19	32/17913	4.92134e-06	0.00113191	0.000641069	GAS6/TNC/COL1A1	3
GO:0031670	cellular response to nutrient	3/19	71/17913	5.52464e-05	0.00726095	0.00411232	GAS6/TNC/COL1A1	3
GO:0033273	response to vitamin	3/19	95/17913	0.000131658	0.00969682	0.00549191	GAS6/TNC/COL1A1	3
GO:0032526	response to retinoic acid	3/19	103/17913	0.000167318	0.0109952	0.00622725	TNC/COL1A1/IGFBP7	3
GO:0042476	odontogenesis	3/19	126/17913	0.000303244	0.0140241	0.00794273	TNC/COL1A2/COL1A1	3
GO:0002576	platelet degranulation	3/19	128/17913	0.000317608	0.0140241	0.00794273	TIMP1/GAS6/FN1	3
GO:0050709	negative regulation of protein secretion	3/19	137/17913	0.000387687	0.0140241	0.00794273	GAS6/FN1/APOE	3
GO:0045807	positive regulation of endocytosis	3/19	141/17913	0.00042178	0.0141481	0.00801294	GAS6/MFGE8/APOE	3
GO:0002792	negative regulation of peptide secretion	3/19	142/17913	0.000430594	0.0141481	0.00801294	GAS6/FN1/APOE	3
GO:0031214	biomineral tissue development	3/19	154/17913	0.000545753	0.0173135	0.00980572	GAS6/COL1A2/COL1A1	3
GO:0048771	tissue remodeling	3/19	170/17913	0.00072766	0.0198193	0.0112249	TIMP1/BGN/IGFBP5	3
GO:0051224	negative regulation of protein transport	3/19	189/17913	0.000989044	0.0241663	0.0136869	GAS6/FN1/APOE	3
GO:0007565	female pregnancy	3/19	193/17913	0.00105071	0.0241663	0.0136869	TIMP1/IGFBP5/IGFBP7	3
GO:1904950	negative regulation of establishment of protein localization	3/19	193/17913	0.00105071	0.0241663	0.0136869	GAS6/FN1/APOE	3
GO:0071229	cellular response to acid chemical	3/19	199/17913	0.0011477	0.025637	0.0145198	TNC/COL1A2/COL1A1	3
GO:0010810	regulation of cell-substrate adhesion	3/19	201/17913	0.00118125	0.025637	0.0145198	LGALS1/COL1A1/FN1	3
GO:1903531	negative regulation of secretion by cell	3/19	202/17913	0.00119825	0.025637	0.0145198	GAS6/FN1/APOE	3
GO:0060560	developmental growth involved in morphogenesis	3/19	214/17913	0.00141452	0.0264491	0.0149797	TNC/FN1/APOE	3
GO:0007584	response to nutrient	3/19	215/17913	0.00143357	0.0264491	0.0149797	GAS6/TNC/COL1A1	3
GO:0031669	cellular response to nutrient levels	3/19	220/17913	0.00153129	0.0264491	0.0149797	GAS6/TNC/COL1A1	3
GO:0001649	osteoblast differentiation	3/19	222/17913	0.00157152	0.0264491	0.0149797	TNC/IGFBP5/COL1A1	3
GO:0044706	multi-multicellular organism process	3/19	225/17913	0.0016331	0.0264491	0.0149797	TIMP1/IGFBP5/IGFBP7	3
GO:0051048	negative regulation of secretion	3/19	226/17913	0.00165396	0.0264491	0.0149797	GAS6/FN1/APOE	3
GO:0042593	glucose homeostasis	3/19	227/17913	0.00167499	0.0264491	0.0149797	GAS6/IGFBP5/LGALS1	3
GO:0033500	carbohydrate homeostasis	3/19	228/17913	0.00169619	0.0264491	0.0149797	GAS6/IGFBP5/LGALS1	3
GO:0071560	cellular response to transforming growth factor beta stimulus	3/19	233/17913	0.00180471	0.0274295	0.015535	COL1A2/COL1A1/FBN1	3
GO:0071559	response to transforming growth factor beta	3/19	239/17913	0.00194056	0.0287954	0.0163086	COL1A2/COL1A1/FBN1	3
GO:0031668	cellular response to extracellular stimulus	3/19	251/17913	0.00223114	0.0315283	0.0178564	GAS6/TNC/COL1A1	3
GO:0030100	regulation of endocytosis	3/19	262/17913	0.00252016	0.0346051	0.019599	GAS6/MFGE8/APOE	3
GO:0060828	regulation of canonical Wnt signaling pathway	3/19	264/17913	0.00257508	0.0347533	0.0196829	COL1A1/IGFBP4/APOE	3
GO:0007162	negative regulation of cell adhesion	3/19	271/17913	0.00277319	0.0359342	0.0203518	TNC/LGALS1/COL1A1	3
GO:0070372	regulation of ERK1 and ERK2 cascade	3/19	271/17913	0.00277319	0.0359342	0.0203518	GAS6/FN1/APOE	3
GO:0070371	ERK1 and ERK2 cascade	3/19	289/17913	0.00332529	0.0402535	0.022798	GAS6/FN1/APOE	3
GO:0060070	canonical Wnt signaling pathway	3/19	311/17913	0.00408637	0.0464131	0.0262866	COL1A1/IGFBP4/APOE	3
GO:0010721	negative regulation of cell development	3/19	317/17913	0.0043109	0.0477835	0.0270627	LGALS1/FBN1/APOE	3
GO:0071496	cellular response to external stimulus	3/19	320/17913	0.00442595	0.0484559	0.0274436	GAS6/TNC/COL1A1	3
GO:0007178	transmembrane receptor protein serine/threonine kinase signaling pathway	3/19	323/17913	0.00454286	0.0484559	0.0274436	FSTL1/COL1A2/FBN1	3
GO:0019058	viral life cycle	3/19	324/17913	0.00458225	0.0484559	0.0274436	GAS6/LGALS1/APOE	3
GO:0030336	negative regulation of cell migration	3/19	332/17913	0.00490488	0.0512783	0.029042	TIMP1/IGFBP5/APOE	3
GO:0030111	regulation of Wnt signaling pathway	3/19	341/17913	0.00528401	0.0528401	0.0299266	COL1A1/IGFBP4/APOE	3
GO:2000146	negative regulation of cell motility	3/19	347/17913	0.00554638	0.0543634	0.0307893	TIMP1/IGFBP5/APOE	3
GO:0051271	negative regulation of cellular component movement	3/19	365/17913	0.00638044	0.0611459	0.0346307	TIMP1/IGFBP5/APOE	3
GO:0040013	negative regulation of locomotion	3/19	377/17913	0.00697623	0.0654911	0.0370916	TIMP1/IGFBP5/APOE	3
GO:0050808	synapse organization	3/19	394/17913	0.00787574	0.0692832	0.0392393	TNC/SPARCL1/APOE	3
GO:0052547	regulation of peptidase activity	3/19	398/17913	0.00809696	0.0692832	0.0392393	TIMP1/GAS6/FN1	3
GO:0043900	regulation of multi-organism process	3/19	408/17913	0.00866615	0.0692832	0.0392393	TIMP1/LGALS1/APOE	3
GO:0043588	skin development	3/19	412/17913	0.00890031	0.0692832	0.0392393	IGFBP5/COL1A2/COL1A1	3
GO:0050673	epithelial cell proliferation	3/19	425/17913	0.00968719	0.0692832	0.0392393	IGFBP5/IGFBP4/APOE	3
GO:0061564	axon development	3/19	438/17913	0.0105139	0.0692832	0.0392393	TNC/FN1/APOE	3
GO:0062012	regulation of small molecule metabolic process	3/19	439/17913	0.0105792	0.0692832	0.0392393	IGFBP5/IGFBP4/APOE	3
GO:0001667	ameboidal-type cell migration	3/19	446/17913	0.0110427	0.0692832	0.0392393	TIMP1/FN1/APOE	3
GO:0050708	regulation of protein secretion	3/19	456/17913	0.0117253	0.0692832	0.0392393	GAS6/FN1/APOE	3
GO:0010975	regulation of neuron projection development	3/19	458/17913	0.0118647	0.0692832	0.0392393	LGALS1/FN1/APOE	3
GO:0060627	regulation of vesicle-mediated transport	3/19	480/17913	0.0134623	0.0692832	0.0392393	GAS6/MFGE8/APOE	3
GO:0002791	regulation of peptide secretion	3/19	483/17913	0.0136893	0.0692832	0.0392393	GAS6/FN1/APOE	3
GO:0002521	leukocyte differentiation	3/19	485/17913	0.0138419	0.0695877	0.0394118	GAS6/LGALS1/FBN1	3
GO:0016055	Wnt signaling pathway	3/19	498/17913	0.0148577	0.0704745	0.0399141	COL1A1/IGFBP4/APOE	3
GO:0009636	response to toxic substance	3/19	499/17913	0.0149375	0.0704745	0.0399141	TNC/COL1A1/APOE	3
GO:0043410	positive regulation of MAPK cascade	3/19	499/17913	0.0149375	0.0704745	0.0399141	GAS6/IGFBP4/APOE	3
GO:0198738	cell-cell signaling by wnt	3/19	500/17913	0.0150177	0.070491	0.0399234	COL1A1/IGFBP4/APOE	3
GO:0043568	positive regulation of insulin-like growth factor receptor signaling pathway	2/19	13/17913	8.25629e-05	0.00838573	0.00474935	IGFBP5/IGFBP4	2
GO:0070208	protein heterotrimerization	2/19	13/17913	8.25629e-05	0.00838573	0.00474935	COL1A2/COL1A1	2
GO:0051043	regulation of membrane protein ectodomain proteolysis	2/19	21/17913	0.000221163	0.0135646	0.00768249	TIMP1/APOE	2
GO:0044342	type B pancreatic cell proliferation	2/19	22/17913	0.000243125	0.0139797	0.00791756	IGFBP5/IGFBP4	2
GO:0043567	regulation of insulin-like growth factor receptor signaling pathway	2/19	24/17913	0.00029012	0.0140241	0.00794273	IGFBP5/IGFBP4	2
GO:0085029	extracellular matrix assembly	2/19	28/17913	0.000396334	0.0140241	0.00794273	GAS6/COL1A2	2
GO:0018149	peptide cross-linking	2/19	34/17913	0.000585983	0.0179702	0.0101776	BGN/FN1	2
GO:0048009	insulin-like growth factor receptor signaling pathway	2/19	36/17913	0.000657225	0.0188952	0.0107015	IGFBP5/IGFBP4	2
GO:0043277	apoptotic cell clearance	2/19	38/17913	0.000732453	0.0198193	0.0112249	GAS6/MFGE8	2
GO:0006509	membrane protein ectodomain proteolysis	2/19	40/17913	0.000811652	0.0207422	0.0117476	TIMP1/APOE	2
GO:0030199	collagen fibril organization	2/19	45/17913	0.00102692	0.0241663	0.0136869	COL1A2/COL1A1	2
GO:0048146	positive regulation of fibroblast proliferation	2/19	51/17913	0.00131755	0.0264491	0.0149797	GAS6/FN1	2
GO:0007566	embryo implantation	2/19	52/17913	0.00136938	0.0264491	0.0149797	TIMP1/IGFBP7	2
GO:0070206	protein trimerization	2/19	54/17913	0.00147595	0.0264491	0.0149797	COL1A2/COL1A1	2
GO:0033619	membrane protein proteolysis	2/19	56/17913	0.00158637	0.0264491	0.0149797	TIMP1/APOE	2
GO:0050766	positive regulation of phagocytosis	2/19	60/17913	0.0018187	0.0274295	0.015535	GAS6/MFGE8	2
GO:0071230	cellular response to amino acid stimulus	2/19	64/17913	0.00206624	0.0301737	0.0170892	COL1A2/COL1A1	2
GO:0071300	cellular response to retinoic acid	2/19	65/17913	0.00213049	0.0306258	0.0173453	TNC/COL1A1	2
GO:0010812	negative regulation of cell-substrate adhesion	2/19	67/17913	0.00226181	0.0315283	0.0178564	LGALS1/COL1A1	2
GO:0050710	negative regulation of cytokine secretion	2/19	72/17913	0.0026065	0.0347533	0.0196829	GAS6/FN1	2
GO:0048678	response to axon injury	2/19	75/17913	0.00282447	0.0360905	0.0204402	TNC/LGALS1	2
GO:0030516	regulation of axon extension	2/19	76/17913	0.00289898	0.0365351	0.020692	FN1/APOE	2
GO:0034109	homotypic cell-cell adhesion	2/19	77/17913	0.00297441	0.0369791	0.0209435	GAS6/LGALS1	2
GO:0051702	interaction with symbiont	2/19	81/17913	0.0032853	0.0402535	0.022798	FN1/APOE	2
GO:0048145	regulation of fibroblast proliferation	2/19	86/17913	0.00369442	0.0441412	0.0249999	GAS6/FN1	2
GO:0048144	fibroblast proliferation	2/19	87/17913	0.00377897	0.0445724	0.0252441	GAS6/FN1	2
GO:0050764	regulation of phagocytosis	2/19	90/17913	0.004038	0.0464131	0.0262866	GAS6/MFGE8	2
GO:0061387	regulation of extent of cell growth	2/19	90/17913	0.004038	0.0464131	0.0262866	FN1/APOE	2
GO:0051591	response to cAMP	2/19	93/17913	0.00430509	0.0477835	0.0270627	IGFBP5/COL1A1	2
GO:0050810	regulation of steroid biosynthetic process	2/19	95/17913	0.00448761	0.0484559	0.0274436	IGFBP7/APOE	2
GO:0048675	axon extension	2/19	101/17913	0.0050564	0.0522684	0.0296028	FN1/APOE	2
GO:0032963	collagen metabolic process	2/19	102/17913	0.00515428	0.0526882	0.0298406	COL1A2/COL1A1	2
GO:0048524	positive regulation of viral process	2/19	103/17913	0.00525303	0.0528401	0.0299266	LGALS1/APOE	2
GO:0043200	response to amino acid	2/19	106/17913	0.00555452	0.0543634	0.0307893	COL1A2/COL1A1	2
GO:0010906	regulation of glucose metabolic process	2/19	113/17913	0.00628827	0.0608969	0.0344897	IGFBP5/IGFBP4	2
GO:0022612	gland morphogenesis	2/19	116/17913	0.0066156	0.0627459	0.0355369	TNC/IGFBP5	2
GO:0046718	viral entry into host cell	2/19	121/17913	0.00717814	0.066706	0.0377797	GAS6/LGALS1	2
GO:0019218	regulation of steroid metabolic process	2/19	124/17913	0.00752578	0.0692371	0.0392133	IGFBP7/APOE	2
GO:0051291	protein heterooligomerization	2/19	128/17913	0.00800099	0.0692832	0.0392393	COL1A2/COL1A1	2
GO:0071333	cellular response to glucose stimulus	2/19	128/17913	0.00800099	0.0692832	0.0392393	GAS6/LGALS1	2
GO:0046683	response to organophosphorus	2/19	130/17913	0.00824359	0.0692832	0.0392393	IGFBP5/COL1A1	2
GO:0071331	cellular response to hexose stimulus	2/19	130/17913	0.00824359	0.0692832	0.0392393	GAS6/LGALS1	2
GO:0071326	cellular response to monosaccharide stimulus	2/19	131/17913	0.00836612	0.0692832	0.0392393	GAS6/LGALS1	2
GO:0030260	entry into host cell	2/19	134/17913	0.00873867	0.0692832	0.0392393	GAS6/LGALS1	2
GO:0030509	BMP signaling pathway	2/19	134/17913	0.00873867	0.0692832	0.0392393	FSTL1/FBN1	2
GO:0044409	entry into host	2/19	134/17913	0.00873867	0.0692832	0.0392393	GAS6/LGALS1	2
GO:0051806	entry into cell of other organism involved in symbiotic interaction	2/19	134/17913	0.00873867	0.0692832	0.0392393	GAS6/LGALS1	2
GO:0051828	entry into other organism involved in symbiotic interaction	2/19	134/17913	0.00873867	0.0692832	0.0392393	GAS6/LGALS1	2
GO:0010977	negative regulation of neuron projection development	2/19	135/17913	0.0088645	0.0692832	0.0392393	LGALS1/APOE	2
GO:0010675	regulation of cellular carbohydrate metabolic process	2/19	138/17913	0.00924687	0.0692832	0.0392393	IGFBP5/IGFBP4	2
GO:0071322	cellular response to carbohydrate stimulus	2/19	139/17913	0.00937596	0.0692832	0.0392393	GAS6/LGALS1	2
GO:0001678	cellular glucose homeostasis	2/19	142/17913	0.00976808	0.0692832	0.0392393	GAS6/LGALS1	2
GO:0014074	response to purine-containing compound	2/19	145/17913	0.0101674	0.0692832	0.0392393	IGFBP5/COL1A1	2
GO:0071774	response to fibroblast growth factor	2/19	145/17913	0.0101674	0.0692832	0.0392393	TNC/COL1A1	2
GO:0071772	response to BMP	2/19	147/17913	0.0104377	0.0692832	0.0392393	FSTL1/FBN1	2
GO:0071773	cellular response to BMP stimulus	2/19	147/17913	0.0104377	0.0692832	0.0392393	FSTL1/FBN1	2
GO:0050770	regulation of axonogenesis	2/19	148/17913	0.010574	0.0692832	0.0392393	FN1/APOE	2
GO:1990138	neuron projection extension	2/19	148/17913	0.010574	0.0692832	0.0392393	FN1/APOE	2
GO:0008361	regulation of cell size	2/19	154/17913	0.0114086	0.0692832	0.0392393	FN1/APOE	2
GO:0031960	response to corticosteroid	2/19	155/17913	0.0115505	0.0692832	0.0392393	COL1A1/IGFBP7	2
GO:0007266	Rho protein signal transduction	2/19	159/17913	0.0121258	0.0692832	0.0392393	COL1A2/APOE	2
GO:0031345	negative regulation of cell projection organization	2/19	166/17913	0.0131624	0.0692832	0.0392393	LGALS1/APOE	2
GO:0008217	regulation of blood pressure	2/19	169/17913	0.0136182	0.0692832	0.0392393	GAS6/COL1A2	2
GO:0030324	lung development	2/19	169/17913	0.0136182	0.0692832	0.0392393	TNC/IGFBP5	2
GO:0090090	negative regulation of canonical Wnt signaling pathway	2/19	169/17913	0.0136182	0.0692832	0.0392393	IGFBP4/APOE	2
GO:0030323	respiratory tube development	2/19	173/17913	0.0142366	0.0704745	0.0399141	TNC/IGFBP5	2
GO:0051897	positive regulation of protein kinase B signaling	2/19	173/17913	0.0142366	0.0704745	0.0399141	GAS6/IGFBP5	2
GO:0042594	response to starvation	2/19	174/17913	0.0143931	0.0704745	0.0399141	FSTL1/GAS6	2
GO:0043902	positive regulation of multi-organism process	2/19	180/17913	0.0153478	0.0705576	0.0399611	LGALS1/APOE	2
GO:0051216	cartilage development	2/19	182/17913	0.015672	0.0705576	0.0399611	TIMP1/COL1A1	2
GO:0007179	transforming growth factor beta receptor signaling pathway	2/19	184/17913	0.0159992	0.0707584	0.0400748	COL1A2/FBN1	2
GO:0070374	positive regulation of ERK1 and ERK2 cascade	2/19	186/17913	0.0163293	0.0707584	0.0400748	GAS6/APOE	2
GO:0060348	bone development	2/19	189/17913	0.01683	0.0707584	0.0400748	COL1A1/FBN1	2
GO:0006694	steroid biosynthetic process	2/19	190/17913	0.0169983	0.0707623	0.0400771	IGFBP7/APOE	2
GO:0009749	response to glucose	2/19	190/17913	0.0169983	0.0707623	0.0400771	GAS6/LGALS1	2
GO:1901654	response to ketone	2/19	191/17913	0.0171674	0.0711443	0.0402934	TNC/IGFBP7	2
GO:0060541	respiratory system development	2/19	193/17913	0.0175078	0.0715493	0.0405228	TNC/IGFBP5	2
GO:0031099	regeneration	2/19	194/17913	0.017679	0.0715493	0.0405228	GAS6/TNC	2
GO:0009746	response to hexose	2/19	195/17913	0.017851	0.0715493	0.0405228	GAS6/LGALS1	2
GO:0046890	regulation of lipid biosynthetic process	2/19	195/17913	0.017851	0.0715493	0.0405228	IGFBP7/APOE	2
GO:0006109	regulation of carbohydrate metabolic process	2/19	198/17913	0.0183713	0.0728517	0.0412604	IGFBP5/IGFBP4	2
GO:0030178	negative regulation of Wnt signaling pathway	2/19	198/17913	0.0183713	0.0728517	0.0412604	IGFBP4/APOE	2
GO:0048762	mesenchymal cell differentiation	2/19	199/17913	0.0185462	0.0728687	0.04127	COL1A1/FN1	2
GO:0009612	response to mechanical stimulus	2/19	200/17913	0.0187217	0.0728687	0.04127	TNC/COL1A1	2
GO:0034284	response to monosaccharide	2/19	200/17913	0.0187217	0.0728687	0.04127	GAS6/LGALS1	2
GO:0045665	negative regulation of neuron differentiation	2/19	201/17913	0.018898	0.0728687	0.04127	LGALS1/APOE	2
GO:0050707	regulation of cytokine secretion	2/19	201/17913	0.018898	0.0728687	0.04127	GAS6/FN1	2
GO:0006006	glucose metabolic process	2/19	204/17913	0.0194311	0.074177	0.042011	IGFBP5/IGFBP4	2
GO:0050792	regulation of viral process	2/19	204/17913	0.0194311	0.074177	0.042011	LGALS1/APOE	2
GO:0010951	negative regulation of endopeptidase activity	2/19	210/17913	0.0205164	0.0770413	0.0436332	TIMP1/GAS6	2
GO:0051701	interaction with host	2/19	211/17913	0.0206998	0.0771395	0.0436888	GAS6/LGALS1	2
GO:0048588	developmental cell growth	2/19	216/17913	0.0216268	0.0771395	0.0436888	FN1/APOE	2
GO:0034249	negative regulation of cellular amide metabolic process	2/19	217/17913	0.0218143	0.0771395	0.0436888	IGFBP5/APOE	2
GO:0010466	negative regulation of peptidase activity	2/19	223/17913	0.0229536	0.0791606	0.0448335	TIMP1/GAS6	2
GO:0009743	response to carbohydrate	2/19	224/17913	0.0231459	0.0791606	0.0448335	GAS6/LGALS1	2
GO:0000302	response to reactive oxygen species	2/19	230/17913	0.0243136	0.0819359	0.0464054	COL1A1/APOE	2
GO:0050663	cytokine secretion	2/19	230/17913	0.0243136	0.0819359	0.0464054	GAS6/FN1	2
GO:0043903	regulation of symbiosis, encompassing mutualism through parasitism	2/19	232/17913	0.0247082	0.0826602	0.0468155	LGALS1/APOE	2
GO:0097305	response to alcohol	2/19	232/17913	0.0247082	0.0826602	0.0468155	TNC/IGFBP7	2
GO:0019318	hexose metabolic process	2/19	239/17913	0.0261102	0.0835174	0.0473011	IGFBP5/IGFBP4	2
GO:0051896	regulation of protein kinase B signaling	2/19	241/17913	0.0265166	0.0835174	0.0473011	GAS6/IGFBP5	2
GO:0061448	connective tissue development	2/19	243/17913	0.0269257	0.0835174	0.0473011	TIMP1/COL1A1	2
GO:0018209	peptidyl-serine modification	2/19	252/17913	0.0287985	0.0853023	0.0483119	GAS6/BGN	2
GO:0044262	cellular carbohydrate metabolic process	2/19	256/17913	0.0296475	0.0858592	0.0486274	IGFBP5/IGFBP4	2
GO:0051251	positive regulation of lymphocyte activation	2/19	258/17913	0.0300757	0.0858592	0.0486274	GAS6/LGALS1	2
GO:0060485	mesenchyme development	2/19	258/17913	0.0300757	0.0858592	0.0486274	COL1A1/FN1	2
GO:0010769	regulation of cell morphogenesis involved in differentiation	2/19	260/17913	0.0305065	0.086092	0.0487592	FN1/APOE	2
GO:0010976	positive regulation of neuron projection development	2/19	265/17913	0.0315943	0.0865082	0.0489949	FN1/APOE	2
GO:0071356	cellular response to tumor necrosis factor	2/19	266/17913	0.0318137	0.0868506	0.0491888	GAS6/COL1A1	2
GO:1902105	regulation of leukocyte differentiation	2/19	267/17913	0.0320338	0.0871925	0.0493825	GAS6/FBN1	2
GO:0043491	protein kinase B signaling	2/19	268/17913	0.0322544	0.0875341	0.049576	GAS6/IGFBP5	2
GO:0050768	negative regulation of neurogenesis	2/19	271/17913	0.0329201	0.0890778	0.0504502	LGALS1/APOE	2
GO:0005996	monosaccharide metabolic process	2/19	277/17913	0.0342677	0.091062	0.051574	IGFBP5/IGFBP4	2
GO:0034612	response to tumor necrosis factor	2/19	284/17913	0.0358673	0.0942797	0.0533964	GAS6/COL1A1	2
GO:0051235	maintenance of location	2/19	286/17913	0.0363296	0.0945818	0.0535675	FBN1/APOE	2
GO:0001818	negative regulation of cytokine production	2/19	290/17913	0.0372614	0.0956194	0.0541551	GAS6/FN1	2
GO:0051961	negative regulation of nervous system development	2/19	290/17913	0.0372614	0.0956194	0.0541551	LGALS1/APOE	2
GO:0002696	positive regulation of leukocyte activation	2/19	305/17913	0.0408378	0.100189	0.0567431	GAS6/LGALS1	2
GO:0006909	phagocytosis	2/19	308/17913	0.0415685	0.10073	0.0570495	GAS6/MFGE8	2
GO:0032535	regulation of cellular component size	2/19	315/17913	0.0432927	0.103749	0.0587597	FN1/APOE	2
GO:0007568	aging	2/19	318/17913	0.04404	0.104425	0.0591421	TIMP1/IGFBP5	2
GO:0050867	positive regulation of cell activation	2/19	319/17913	0.0442901	0.104748	0.0593252	GAS6/LGALS1	2
GO:0008202	steroid metabolic process	2/19	321/17913	0.0447921	0.104822	0.059367	IGFBP7/APOE	2
GO:0001655	urogenital system development	2/19	324/17913	0.0455492	0.104822	0.059367	TNC/FBN1	2
GO:0007265	Ras protein signal transduction	2/19	324/17913	0.0455492	0.104822	0.059367	COL1A2/APOE	2
GO:0045861	negative regulation of proteolysis	2/19	324/17913	0.0455492	0.104822	0.059367	TIMP1/GAS6	2
GO:0030098	lymphocyte differentiation	2/19	325/17913	0.0458026	0.104822	0.059367	GAS6/LGALS1	2
GO:0048638	regulation of developmental growth	2/19	325/17913	0.0458026	0.104822	0.059367	FN1/APOE	2
GO:0046677	response to antibiotic	2/19	328/17913	0.046566	0.105799	0.0599206	TNC/COL1A1	2
GO:0045862	positive regulation of proteolysis	2/19	333/17913	0.0478491	0.106589	0.0603678	FN1/APOE	2
GO:0042176	regulation of protein catabolic process	2/19	354/17913	0.0533799	0.110656	0.0626711	TIMP1/APOE	2
GO:0045666	positive regulation of neuron differentiation	2/19	355/17913	0.0536489	0.110656	0.0626711	FN1/APOE	2
GO:0031346	positive regulation of cell projection organization	2/19	362/17913	0.0555455	0.113027	0.0640141	FN1/APOE	2
GO:0052548	regulation of endopeptidase activity	2/19	370/17913	0.0577425	0.11482	0.0650297	TIMP1/GAS6	2
GO:0048545	response to steroid hormone	2/19	375/17913	0.0591312	0.11674	0.0661169	COL1A1/IGFBP7	2
GO:0045785	positive regulation of cell adhesion	2/19	388/17913	0.062797	0.120361	0.0681678	LGALS1/FN1	2
GO:0007409	axonogenesis	2/19	393/17913	0.0642278	0.122592	0.0694316	FN1/APOE	2
GO:0051249	regulation of lymphocyte activation	2/19	401/17913	0.0665404	0.124212	0.070349	GAS6/LGALS1	2
GO:0019216	regulation of lipid metabolic process	2/19	402/17913	0.0668315	0.124212	0.070349	IGFBP7/APOE	2
GO:0051346	negative regulation of hydrolase activity	2/19	420/17913	0.0721458	0.131226	0.0743213	TIMP1/GAS6	2
GO:0048732	gland development	2/19	422/17913	0.0727448	0.131226	0.0743213	TNC/IGFBP5	2
GO:0022604	regulation of cell morphogenesis	2/19	430/17913	0.0751577	0.133743	0.0757468	FN1/APOE	2
GO:0006979	response to oxidative stress	2/19	442/17913	0.0788261	0.136316	0.077204	COL1A1/APOE	2
GO:0090066	regulation of anatomical structure size	2/19	442/17913	0.0788261	0.136316	0.077204	FN1/APOE	2
GO:0034248	regulation of cellular amide metabolic process	2/19	452/17913	0.081927	0.13909	0.0787749	IGFBP5/APOE	2
GO:0050769	positive regulation of neurogenesis	2/19	455/17913	0.0828649	0.139371	0.0789341	FN1/APOE	2
GO:0007264	small GTPase mediated signal transduction	2/19	465/17913	0.0860159	0.14228	0.0805822	COL1A2/APOE	2
GO:0006875	cellular metal ion homeostasis	2/19	467/17913	0.0866506	0.142355	0.0806241	CP/APOE	2
GO:1903706	regulation of hemopoiesis	2/19	468/17913	0.0869685	0.142607	0.0807673	GAS6/FBN1	2
GO:0002694	regulation of leukocyte activation	2/19	492/17913	0.0947072	0.146673	0.0830699	GAS6/LGALS1	2
GO:0048667	cell morphogenesis involved in neuron differentiation	2/19	500/17913	0.0973317	0.148994	0.0843842	FN1/APOE	2
GO:0019062	virion attachment to host cell	1/19	10/17913	0.010559	0.0692832	0.0392393	GAS6	1
GO:0032488	Cdc42 protein signal transduction	1/19	10/17913	0.010559	0.0692832	0.0392393	APOE	1
GO:0032823	regulation of natural killer cell differentiation	1/19	10/17913	0.010559	0.0692832	0.0392393	GAS6	1
GO:0034350	regulation of glial cell apoptotic process	1/19	10/17913	0.010559	0.0692832	0.0392393	GAS6	1
GO:0034378	chylomicron assembly	1/19	10/17913	0.010559	0.0692832	0.0392393	APOE	1
GO:0034447	very-low-density lipoprotein particle clearance	1/19	10/17913	0.010559	0.0692832	0.0392393	APOE	1
GO:0044803	multi-organism membrane organization	1/19	10/17913	0.010559	0.0692832	0.0392393	GAS6	1
GO:0060346	bone trabecula formation	1/19	10/17913	0.010559	0.0692832	0.0392393	COL1A1	1
GO:0097090	presynaptic membrane organization	1/19	10/17913	0.010559	0.0692832	0.0392393	APOE	1
GO:0003093	regulation of glomerular filtration	1/19	11/17913	0.011609	0.0692832	0.0392393	GAS6	1
GO:0033700	phospholipid efflux	1/19	11/17913	0.011609	0.0692832	0.0392393	APOE	1
GO:0034372	very-low-density lipoprotein particle remodeling	1/19	11/17913	0.011609	0.0692832	0.0392393	APOE	1
GO:0035457	cellular response to interferon-alpha	1/19	11/17913	0.011609	0.0692832	0.0392393	GAS6	1
GO:0060856	establishment of blood-brain barrier	1/19	11/17913	0.011609	0.0692832	0.0392393	MXRA8	1
GO:0090209	negative regulation of triglyceride metabolic process	1/19	11/17913	0.011609	0.0692832	0.0392393	APOE	1
GO:0097048	dendritic cell apoptotic process	1/19	11/17913	0.011609	0.0692832	0.0392393	GAS6	1
GO:1900115	extracellular regulation of signal transduction	1/19	11/17913	0.011609	0.0692832	0.0392393	FBN1	1
GO:1900116	extracellular negative regulation of signal transduction	1/19	11/17913	0.011609	0.0692832	0.0392393	FBN1	1
GO:2000668	regulation of dendritic cell apoptotic process	1/19	11/17913	0.011609	0.0692832	0.0392393	GAS6	1
GO:2001204	regulation of osteoclast development	1/19	11/17913	0.011609	0.0692832	0.0392393	FBN1	1
GO:0009886	post-embryonic animal morphogenesis	1/19	12/17913	0.0126581	0.0692832	0.0392393	FBN1	1
GO:0010872	regulation of cholesterol esterification	1/19	12/17913	0.0126581	0.0692832	0.0392393	APOE	1
GO:0030208	dermatan sulfate biosynthetic process	1/19	12/17913	0.0126581	0.0692832	0.0392393	BGN	1
GO:0033197	response to vitamin E	1/19	12/17913	0.0126581	0.0692832	0.0392393	COL1A1	1
GO:0034380	high-density lipoprotein particle assembly	1/19	12/17913	0.0126581	0.0692832	0.0392393	APOE	1
GO:0035641	locomotory exploration behavior	1/19	12/17913	0.0126581	0.0692832	0.0392393	APOE	1
GO:0044650	adhesion of symbiont to host cell	1/19	12/17913	0.0126581	0.0692832	0.0392393	GAS6	1
GO:0061450	trophoblast cell migration	1/19	12/17913	0.0126581	0.0692832	0.0392393	TIMP1	1
GO:0072578	neurotransmitter-gated ion channel clustering	1/19	12/17913	0.0126581	0.0692832	0.0392393	APOE	1
GO:1900165	negative regulation of interleukin-6 secretion	1/19	12/17913	0.0126581	0.0692832	0.0392393	GAS6	1
GO:1901163	regulation of trophoblast cell migration	1/19	12/17913	0.0126581	0.0692832	0.0392393	TIMP1	1
GO:1902430	negative regulation of amyloid-beta formation	1/19	12/17913	0.0126581	0.0692832	0.0392393	APOE	1
GO:1902950	regulation of dendritic spine maintenance	1/19	12/17913	0.0126581	0.0692832	0.0392393	APOE	1
GO:0014745	negative regulation of muscle adaptation	1/19	13/17913	0.013706	0.0692832	0.0392393	IGFBP5	1
GO:0030205	dermatan sulfate metabolic process	1/19	13/17913	0.013706	0.0692832	0.0392393	BGN	1
GO:0032802	low-density lipoprotein particle receptor catabolic process	1/19	13/17913	0.013706	0.0692832	0.0392393	APOE	1
GO:0034370	triglyceride-rich lipoprotein particle remodeling	1/19	13/17913	0.013706	0.0692832	0.0392393	APOE	1
GO:0034374	low-density lipoprotein particle remodeling	1/19	13/17913	0.013706	0.0692832	0.0392393	APOE	1
GO:0044794	positive regulation by host of viral process	1/19	13/17913	0.013706	0.0692832	0.0392393	APOE	1
GO:0061430	bone trabecula morphogenesis	1/19	13/17913	0.013706	0.0692832	0.0392393	COL1A1	1
GO:0090594	inflammatory response to wounding	1/19	13/17913	0.013706	0.0692832	0.0392393	TIMP1	1
GO:1900272	negative regulation of long-term synaptic potentiation	1/19	13/17913	0.013706	0.0692832	0.0392393	APOE	1
GO:2001044	regulation of integrin-mediated signaling pathway	1/19	13/17913	0.013706	0.0692832	0.0392393	TIMP1	1
GO:0006825	copper ion transport	1/19	14/17913	0.0147529	0.0704745	0.0399141	CP	1
GO:0006910	phagocytosis, recognition	1/19	14/17913	0.0147529	0.0704745	0.0399141	MFGE8	1
GO:0030207	chondroitin sulfate catabolic process	1/19	14/17913	0.0147529	0.0704745	0.0399141	BGN	1
GO:0048569	post-embryonic animal organ development	1/19	14/17913	0.0147529	0.0704745	0.0399141	FBN1	1
GO:1901626	regulation of postsynaptic membrane organization	1/19	14/17913	0.0147529	0.0704745	0.0399141	APOE	1
GO:1905049	negative regulation of metallopeptidase activity	1/19	14/17913	0.0147529	0.0704745	0.0399141	TIMP1	1
GO:0014733	regulation of skeletal muscle adaptation	1/19	15/17913	0.0157988	0.0705576	0.0399611	IGFBP5	1
GO:0034349	glial cell apoptotic process	1/19	15/17913	0.0157988	0.0705576	0.0399611	GAS6	1
GO:0044406	adhesion of symbiont to host	1/19	15/17913	0.0157988	0.0705576	0.0399611	GAS6	1
GO:0050651	dermatan sulfate proteoglycan biosynthetic process	1/19	15/17913	0.0157988	0.0705576	0.0399611	BGN	1
GO:0051044	positive regulation of membrane protein ectodomain proteolysis	1/19	15/17913	0.0157988	0.0705576	0.0399611	APOE	1
GO:0055089	fatty acid homeostasis	1/19	15/17913	0.0157988	0.0705576	0.0399611	APOE	1
GO:1902992	negative regulation of amyloid precursor protein catabolic process	1/19	15/17913	0.0157988	0.0705576	0.0399611	APOE	1
GO:1990000	amyloid fibril formation	1/19	15/17913	0.0157988	0.0705576	0.0399611	APOE	1
GO:0001977	renal system process involved in regulation of blood volume	1/19	16/17913	0.0168436	0.0707584	0.0400748	GAS6	1
GO:0010875	positive regulation of cholesterol efflux	1/19	16/17913	0.0168436	0.0707584	0.0400748	APOE	1
GO:0010934	macrophage cytokine production	1/19	16/17913	0.0168436	0.0707584	0.0400748	GAS6	1
GO:0034433	steroid esterification	1/19	16/17913	0.0168436	0.0707584	0.0400748	APOE	1
GO:0034434	sterol esterification	1/19	16/17913	0.0168436	0.0707584	0.0400748	APOE	1
GO:0034435	cholesterol esterification	1/19	16/17913	0.0168436	0.0707584	0.0400748	APOE	1
GO:0036035	osteoclast development	1/19	16/17913	0.0168436	0.0707584	0.0400748	FBN1	1
GO:0050655	dermatan sulfate proteoglycan metabolic process	1/19	16/17913	0.0168436	0.0707584	0.0400748	BGN	1
GO:0070293	renal absorption	1/19	16/17913	0.0168436	0.0707584	0.0400748	GAS6	1
GO:1900221	regulation of amyloid-beta clearance	1/19	16/17913	0.0168436	0.0707584	0.0400748	APOE	1
GO:0034375	high-density lipoprotein particle remodeling	1/19	17/17913	0.0178873	0.0715493	0.0405228	APOE	1
GO:0034384	high-density lipoprotein particle clearance	1/19	17/17913	0.0178873	0.0715493	0.0405228	APOE	1
GO:0050711	negative regulation of interleukin-1 secretion	1/19	17/17913	0.0178873	0.0715493	0.0405228	GAS6	1
GO:1902931	negative regulation of alcohol biosynthetic process	1/19	17/17913	0.0178873	0.0715493	0.0405228	APOE	1
GO:0001779	natural killer cell differentiation	1/19	18/17913	0.01893	0.0728687	0.04127	GAS6	1
GO:0007271	synaptic transmission, cholinergic	1/19	18/17913	0.01893	0.0728687	0.04127	APOE	1
GO:0002313	mature B cell differentiation involved in immune response	1/19	19/17913	0.0199717	0.075303	0.0426487	LGALS1	1
GO:0010544	negative regulation of platelet activation	1/19	19/17913	0.0199717	0.075303	0.0426487	APOE	1
GO:0043691	reverse cholesterol transport	1/19	19/17913	0.0199717	0.075303	0.0426487	APOE	1
GO:0032816	positive regulation of natural killer cell activation	1/19	20/17913	0.0210123	0.0771395	0.0436888	GAS6	1
GO:0034505	tooth mineralization	1/19	20/17913	0.0210123	0.0771395	0.0436888	COL1A1	1
GO:0060602	branch elongation of an epithelium	1/19	20/17913	0.0210123	0.0771395	0.0436888	TNC	1
GO:0097062	dendritic spine maintenance	1/19	20/17913	0.0210123	0.0771395	0.0436888	APOE	1
GO:0003094	glomerular filtration	1/19	21/17913	0.0220518	0.0771395	0.0436888	GAS6	1
GO:0032373	positive regulation of sterol transport	1/19	21/17913	0.0220518	0.0771395	0.0436888	APOE	1
GO:0032376	positive regulation of cholesterol transport	1/19	21/17913	0.0220518	0.0771395	0.0436888	APOE	1
GO:0032462	regulation of protein homooligomerization	1/19	21/17913	0.0220518	0.0771395	0.0436888	APOE	1
GO:0035455	response to interferon-alpha	1/19	21/17913	0.0220518	0.0771395	0.0436888	GAS6	1
GO:0046827	positive regulation of protein export from nucleus	1/19	21/17913	0.0220518	0.0771395	0.0436888	GAS6	1
GO:0055093	response to hyperoxia	1/19	21/17913	0.0220518	0.0771395	0.0436888	COL1A1	1
GO:0071379	cellular response to prostaglandin stimulus	1/19	21/17913	0.0220518	0.0771395	0.0436888	TNC	1
GO:0097709	connective tissue replacement	1/19	21/17913	0.0220518	0.0771395	0.0436888	TIMP1	1
GO:1903010	regulation of bone development	1/19	21/17913	0.0220518	0.0771395	0.0436888	FBN1	1
GO:2000269	regulation of fibroblast apoptotic process	1/19	21/17913	0.0220518	0.0771395	0.0436888	GAS6	1
GO:0032799	low-density lipoprotein receptor particle metabolic process	1/19	22/17913	0.0230903	0.0791606	0.0448335	APOE	1
GO:0033622	integrin activation	1/19	22/17913	0.0230903	0.0791606	0.0448335	FN1	1
GO:0051000	positive regulation of nitric-oxide synthase activity	1/19	22/17913	0.0230903	0.0791606	0.0448335	APOE	1
GO:0097205	renal filtration	1/19	22/17913	0.0230903	0.0791606	0.0448335	GAS6	1
GO:0071305	cellular response to vitamin D	1/19	23/17913	0.0241278	0.0819099	0.0463906	TNC	1
GO:1902003	regulation of amyloid-beta formation	1/19	23/17913	0.0241278	0.0819099	0.0463906	APOE	1
GO:0002407	dendritic cell chemotaxis	1/19	24/17913	0.0251642	0.0826825	0.0468282	GAS6	1
GO:0010804	negative regulation of tumor necrosis factor-mediated signaling pathway	1/19	24/17913	0.0251642	0.0826825	0.0468282	GAS6	1
GO:0031069	hair follicle morphogenesis	1/19	24/17913	0.0251642	0.0826825	0.0468282	IGFBP5	1
GO:0044346	fibroblast apoptotic process	1/19	24/17913	0.0251642	0.0826825	0.0468282	GAS6	1
GO:0060343	trabecula formation	1/19	24/17913	0.0251642	0.0826825	0.0468282	COL1A1	1
GO:0002335	mature B cell differentiation	1/19	25/17913	0.0261996	0.0835174	0.0473011	LGALS1	1
GO:0003071	renal system process involved in regulation of systemic arterial blood pressure	1/19	25/17913	0.0261996	0.0835174	0.0473011	GAS6	1
GO:0034110	regulation of homotypic cell-cell adhesion	1/19	25/17913	0.0261996	0.0835174	0.0473011	LGALS1	1
GO:0035640	exploration behavior	1/19	25/17913	0.0261996	0.0835174	0.0473011	APOE	1
GO:0060740	prostate gland epithelium morphogenesis	1/19	25/17913	0.0261996	0.0835174	0.0473011	TNC	1
GO:1905809	negative regulation of synapse organization	1/19	25/17913	0.0261996	0.0835174	0.0473011	APOE	1
GO:0002021	response to dietary excess	1/19	26/17913	0.0272339	0.0835174	0.0473011	APOE	1
GO:0007263	nitric oxide mediated signal transduction	1/19	26/17913	0.0272339	0.0835174	0.0473011	APOE	1
GO:0019934	cGMP-mediated signaling	1/19	26/17913	0.0272339	0.0835174	0.0473011	APOE	1
GO:0030206	chondroitin sulfate biosynthetic process	1/19	26/17913	0.0272339	0.0835174	0.0473011	BGN	1
GO:0034377	plasma lipoprotein particle assembly	1/19	26/17913	0.0272339	0.0835174	0.0473011	APOE	1
GO:0043501	skeletal muscle adaptation	1/19	26/17913	0.0272339	0.0835174	0.0473011	IGFBP5	1
GO:0060351	cartilage development involved in endochondral bone morphogenesis	1/19	26/17913	0.0272339	0.0835174	0.0473011	COL1A1	1
GO:0070168	negative regulation of biomineral tissue development	1/19	26/17913	0.0272339	0.0835174	0.0473011	GAS6	1
GO:0099560	synaptic membrane adhesion	1/19	26/17913	0.0272339	0.0835174	0.0473011	SPARCL1	1
GO:1904754	positive regulation of vascular associated smooth muscle cell migration	1/19	26/17913	0.0272339	0.0835174	0.0473011	IGFBP5	1
GO:1905048	regulation of metallopeptidase activity	1/19	26/17913	0.0272339	0.0835174	0.0473011	TIMP1	1
GO:0001958	endochondral ossification	1/19	27/17913	0.0282672	0.0849865	0.0481331	COL1A1	1
GO:0036075	replacement ossification	1/19	27/17913	0.0282672	0.0849865	0.0481331	COL1A1	1
GO:0036336	dendritic cell migration	1/19	27/17913	0.0282672	0.0849865	0.0481331	GAS6	1
GO:0044788	modulation by host of viral process	1/19	27/17913	0.0282672	0.0849865	0.0481331	APOE	1
GO:0045671	negative regulation of osteoclast differentiation	1/19	27/17913	0.0282672	0.0849865	0.0481331	FBN1	1
GO:0060512	prostate gland morphogenesis	1/19	27/17913	0.0282672	0.0849865	0.0481331	TNC	1
GO:0010894	negative regulation of steroid biosynthetic process	1/19	28/17913	0.0292995	0.0853023	0.0483119	APOE	1
GO:0032770	positive regulation of monooxygenase activity	1/19	28/17913	0.0292995	0.0853023	0.0483119	APOE	1
GO:0032814	regulation of natural killer cell activation	1/19	28/17913	0.0292995	0.0853023	0.0483119	GAS6	1
GO:0034367	protein-containing complex remodeling	1/19	28/17913	0.0292995	0.0853023	0.0483119	APOE	1
GO:0034368	protein-lipid complex remodeling	1/19	28/17913	0.0292995	0.0853023	0.0483119	APOE	1
GO:0034369	plasma lipoprotein particle remodeling	1/19	28/17913	0.0292995	0.0853023	0.0483119	APOE	1
GO:0036296	response to increased oxygen levels	1/19	28/17913	0.0292995	0.0853023	0.0483119	COL1A1	1
GO:0042311	vasodilation	1/19	28/17913	0.0292995	0.0853023	0.0483119	APOE	1
GO:0048730	epidermis morphogenesis	1/19	28/17913	0.0292995	0.0853023	0.0483119	IGFBP5	1
GO:0003401	axis elongation	1/19	29/17913	0.0303307	0.0858592	0.0486274	TNC	1
GO:0006929	substrate-dependent cell migration	1/19	29/17913	0.0303307	0.0858592	0.0486274	FN1	1
GO:0034205	amyloid-beta formation	1/19	29/17913	0.0303307	0.0858592	0.0486274	APOE	1
GO:0045940	positive regulation of steroid metabolic process	1/19	29/17913	0.0303307	0.0858592	0.0486274	APOE	1
GO:0050650	chondroitin sulfate proteoglycan biosynthetic process	1/19	29/17913	0.0303307	0.0858592	0.0486274	BGN	1
GO:0060441	epithelial tube branching involved in lung morphogenesis	1/19	29/17913	0.0303307	0.0858592	0.0486274	TNC	1
GO:0010543	regulation of platelet activation	1/19	30/17913	0.0313609	0.0861254	0.0487781	APOE	1
GO:0032689	negative regulation of interferon-gamma production	1/19	30/17913	0.0313609	0.0861254	0.0487781	GAS6	1
GO:0034694	response to prostaglandin	1/19	30/17913	0.0313609	0.0861254	0.0487781	TNC	1
GO:0045939	negative regulation of steroid metabolic process	1/19	30/17913	0.0313609	0.0861254	0.0487781	APOE	1
GO:0046596	regulation of viral entry into host cell	1/19	30/17913	0.0313609	0.0861254	0.0487781	LGALS1	1
GO:0060325	face morphogenesis	1/19	30/17913	0.0313609	0.0861254	0.0487781	COL1A1	1
GO:0061082	myeloid leukocyte cytokine production	1/19	30/17913	0.0313609	0.0861254	0.0487781	GAS6	1
GO:0065005	protein-lipid complex assembly	1/19	30/17913	0.0313609	0.0861254	0.0487781	APOE	1
GO:1902991	regulation of amyloid precursor protein catabolic process	1/19	30/17913	0.0313609	0.0861254	0.0487781	APOE	1
GO:0007616	long-term memory	1/19	33/17913	0.0344452	0.091062	0.051574	APOE	1
GO:0032801	receptor catabolic process	1/19	33/17913	0.0344452	0.091062	0.051574	APOE	1
GO:0048048	embryonic eye morphogenesis	1/19	33/17913	0.0344452	0.091062	0.051574	FBN1	1
GO:0055094	response to lipoprotein particle	1/19	33/17913	0.0344452	0.091062	0.051574	APOE	1
GO:0097242	amyloid-beta clearance	1/19	33/17913	0.0344452	0.091062	0.051574	APOE	1
GO:0098751	bone cell development	1/19	33/17913	0.0344452	0.091062	0.051574	FBN1	1
GO:2000352	negative regulation of endothelial cell apoptotic process	1/19	33/17913	0.0344452	0.091062	0.051574	GAS6	1
GO:0032148	activation of protein kinase B activity	1/19	34/17913	0.0354712	0.0935058	0.0529581	GAS6	1
GO:0007528	neuromuscular junction development	1/19	35/17913	0.0364962	0.0945818	0.0535675	TNC	1
GO:0060323	head morphogenesis	1/19	35/17913	0.0364962	0.0945818	0.0535675	COL1A1	1
GO:0060416	response to growth hormone	1/19	35/17913	0.0364962	0.0945818	0.0535675	IGFBP5	1
GO:0071402	cellular response to lipoprotein particle stimulus	1/19	35/17913	0.0364962	0.0945818	0.0535675	APOE	1
GO:0046825	regulation of protein export from nucleus	1/19	36/17913	0.0375202	0.0956194	0.0541551	GAS6	1
GO:0055090	acylglycerol homeostasis	1/19	36/17913	0.0375202	0.0956194	0.0541551	APOE	1
GO:0070328	triglyceride homeostasis	1/19	36/17913	0.0375202	0.0956194	0.0541551	APOE	1
GO:0098801	regulation of renal system process	1/19	36/17913	0.0375202	0.0956194	0.0541551	GAS6	1
GO:0001662	behavioral fear response	1/19	37/17913	0.0385432	0.0971499	0.055022	APOE	1
GO:0001755	neural crest cell migration	1/19	37/17913	0.0385432	0.0971499	0.055022	FN1	1
GO:0001941	postsynaptic membrane organization	1/19	37/17913	0.0385432	0.0971499	0.055022	APOE	1
GO:0014912	negative regulation of smooth muscle cell migration	1/19	37/17913	0.0385432	0.0971499	0.055022	IGFBP5	1
GO:0002209	behavioral defense response	1/19	38/17913	0.0395651	0.0986446	0.0558685	APOE	1
GO:0019068	virion assembly	1/19	38/17913	0.0395651	0.0986446	0.0558685	APOE	1
GO:0032008	positive regulation of TOR signaling	1/19	38/17913	0.0395651	0.0986446	0.0558685	GAS6	1
GO:0033280	response to vitamin D	1/19	38/17913	0.0395651	0.0986446	0.0558685	TNC	1
GO:0010874	regulation of cholesterol efflux	1/19	39/17913	0.040586	0.0998371	0.0565439	APOE	1
GO:0014741	negative regulation of muscle hypertrophy	1/19	39/17913	0.040586	0.0998371	0.0565439	IGFBP5	1
GO:0030204	chondroitin sulfate metabolic process	1/19	39/17913	0.040586	0.0998371	0.0565439	BGN	1
GO:0042596	fear response	1/19	39/17913	0.040586	0.0998371	0.0565439	APOE	1
GO:0090207	regulation of triglyceride metabolic process	1/19	39/17913	0.040586	0.0998371	0.0565439	APOE	1
GO:0032692	negative regulation of interleukin-1 production	1/19	40/17913	0.0416058	0.10073	0.0570495	GAS6	1
GO:0042987	amyloid precursor protein catabolic process	1/19	40/17913	0.0416058	0.10073	0.0570495	APOE	1
GO:0048286	lung alveolus development	1/19	40/17913	0.0416058	0.10073	0.0570495	IGFBP5	1
GO:0050435	amyloid-beta metabolic process	1/19	40/17913	0.0416058	0.10073	0.0570495	APOE	1
GO:0006911	phagocytosis, engulfment	1/19	41/17913	0.0426246	0.102656	0.0581405	MFGE8	1
GO:0045773	positive regulation of axon extension	1/19	41/17913	0.0426246	0.102656	0.0581405	FN1	1
GO:0048247	lymphocyte chemotaxis	1/19	42/17913	0.0436424	0.103749	0.0587597	GAS6	1
GO:0050654	chondroitin sulfate proteoglycan metabolic process	1/19	42/17913	0.0436424	0.103749	0.0587597	BGN	1
GO:0060999	positive regulation of dendritic spine development	1/19	42/17913	0.0436424	0.103749	0.0587597	APOE	1
GO:1900271	regulation of long-term synaptic potentiation	1/19	42/17913	0.0436424	0.103749	0.0587597	APOE	1
GO:0060443	mammary gland morphogenesis	1/19	43/17913	0.0446592	0.104812	0.0593617	IGFBP5	1
GO:0071364	cellular response to epidermal growth factor stimulus	1/19	43/17913	0.0446592	0.104812	0.0593617	COL1A1	1
GO:0097028	dendritic cell differentiation	1/19	43/17913	0.0446592	0.104812	0.0593617	GAS6	1
GO:0030850	prostate gland development	1/19	44/17913	0.045675	0.104822	0.059367	TNC	1
GO:0032459	regulation of protein oligomerization	1/19	44/17913	0.045675	0.104822	0.059367	APOE	1
GO:0048483	autonomic nervous system development	1/19	44/17913	0.045675	0.104822	0.059367	FN1	1
GO:0071827	plasma lipoprotein particle organization	1/19	44/17913	0.045675	0.104822	0.059367	APOE	1
GO:0001974	blood vessel remodeling	1/19	45/17913	0.0466897	0.105799	0.0599206	BGN	1
GO:0035987	endodermal cell differentiation	1/19	45/17913	0.0466897	0.105799	0.0599206	FN1	1
GO:0072604	interleukin-6 secretion	1/19	45/17913	0.0466897	0.105799	0.0599206	GAS6	1
GO:0030514	negative regulation of BMP signaling pathway	1/19	46/17913	0.0477034	0.106522	0.06033	FBN1	1
GO:0060324	face development	1/19	46/17913	0.0477034	0.106522	0.06033	COL1A1	1
GO:1904036	negative regulation of epithelial cell apoptotic process	1/19	46/17913	0.0477034	0.106522	0.06033	GAS6	1
GO:1904738	vascular associated smooth muscle cell migration	1/19	46/17913	0.0477034	0.106522	0.06033	IGFBP5	1
GO:1904752	regulation of vascular associated smooth muscle cell migration	1/19	46/17913	0.0477034	0.106522	0.06033	IGFBP5	1
GO:2000107	negative regulation of leukocyte apoptotic process	1/19	46/17913	0.0477034	0.106522	0.06033	GAS6	1
GO:0001961	positive regulation of cytokine-mediated signaling pathway	1/19	47/17913	0.0487161	0.106711	0.0604372	GAS6	1
GO:0006953	acute-phase response	1/19	47/17913	0.0487161	0.106711	0.0604372	FN1	1
GO:0014911	positive regulation of smooth muscle cell migration	1/19	47/17913	0.0487161	0.106711	0.0604372	IGFBP5	1
GO:0044764	multi-organism cellular process	1/19	47/17913	0.0487161	0.106711	0.0604372	GAS6	1
GO:0048168	regulation of neuronal synaptic plasticity	1/19	47/17913	0.0487161	0.106711	0.0604372	APOE	1
GO:0061383	trabecula morphogenesis	1/19	47/17913	0.0487161	0.106711	0.0604372	COL1A1	1
GO:0070849	response to epidermal growth factor	1/19	47/17913	0.0487161	0.106711	0.0604372	COL1A1	1
GO:0002762	negative regulation of myeloid leukocyte differentiation	1/19	48/17913	0.0497277	0.107646	0.0609665	FBN1	1
GO:0010171	body morphogenesis	1/19	48/17913	0.0497277	0.107646	0.0609665	COL1A1	1
GO:0031103	axon regeneration	1/19	48/17913	0.0497277	0.107646	0.0609665	TNC	1
GO:0044273	sulfur compound catabolic process	1/19	48/17913	0.0497277	0.107646	0.0609665	BGN	1
GO:0071825	protein-lipid complex subunit organization	1/19	48/17913	0.0497277	0.107646	0.0609665	APOE	1
GO:0030195	negative regulation of blood coagulation	1/19	49/17913	0.0507384	0.10881	0.0616256	APOE	1
GO:0043113	receptor clustering	1/19	49/17913	0.0507384	0.10881	0.0616256	APOE	1
GO:1903793	positive regulation of anion transport	1/19	49/17913	0.0507384	0.10881	0.0616256	APOE	1
GO:1904707	positive regulation of vascular smooth muscle cell proliferation	1/19	49/17913	0.0507384	0.10881	0.0616256	IGFBP5	1
GO:0001706	endoderm formation	1/19	50/17913	0.051748	0.108943	0.0617012	FN1	1
GO:0010718	positive regulation of epithelial to mesenchymal transition	1/19	50/17913	0.051748	0.108943	0.0617012	COL1A1	1
GO:0045540	regulation of cholesterol biosynthetic process	1/19	50/17913	0.051748	0.108943	0.0617012	APOE	1
GO:0055081	anion homeostasis	1/19	50/17913	0.051748	0.108943	0.0617012	APOE	1
GO:0060425	lung morphogenesis	1/19	50/17913	0.051748	0.108943	0.0617012	TNC	1
GO:0099024	plasma membrane invagination	1/19	50/17913	0.051748	0.108943	0.0617012	MFGE8	1
GO:0106118	regulation of sterol biosynthetic process	1/19	50/17913	0.051748	0.108943	0.0617012	APOE	1
GO:1900047	negative regulation of hemostasis	1/19	50/17913	0.051748	0.108943	0.0617012	APOE	1
GO:0045668	negative regulation of osteoblast differentiation	1/19	51/17913	0.0527566	0.110561	0.0626173	IGFBP5	1
GO:0050999	regulation of nitric-oxide synthase activity	1/19	51/17913	0.0527566	0.110561	0.0626173	APOE	1
GO:0043954	cellular component maintenance	1/19	52/17913	0.0537642	0.110656	0.0626711	APOE	1
GO:0050704	regulation of interleukin-1 secretion	1/19	52/17913	0.0537642	0.110656	0.0626711	GAS6	1
GO:0051353	positive regulation of oxidoreductase activity	1/19	52/17913	0.0537642	0.110656	0.0626711	APOE	1
GO:0060350	endochondral bone morphogenesis	1/19	52/17913	0.0537642	0.110656	0.0626711	COL1A1	1
GO:0071320	cellular response to cAMP	1/19	52/17913	0.0537642	0.110656	0.0626711	IGFBP5	1
GO:2000242	negative regulation of reproductive process	1/19	52/17913	0.0537642	0.110656	0.0626711	TIMP1	1
GO:0030166	proteoglycan biosynthetic process	1/19	53/17913	0.0547708	0.111976	0.0634188	BGN	1
GO:0032964	collagen biosynthetic process	1/19	53/17913	0.0547708	0.111976	0.0634188	COL1A1	1
GO:0050819	negative regulation of coagulation	1/19	53/17913	0.0547708	0.111976	0.0634188	APOE	1
GO:0032715	negative regulation of interleukin-6 production	1/19	54/17913	0.0557764	0.113027	0.0640141	GAS6	1
GO:0060760	positive regulation of response to cytokine stimulus	1/19	54/17913	0.0557764	0.113027	0.0640141	GAS6	1
GO:0097755	positive regulation of blood vessel diameter	1/19	54/17913	0.0557764	0.113027	0.0640141	APOE	1
GO:0031102	neuron projection regeneration	1/19	55/17913	0.0567809	0.114307	0.0647393	TNC	1
GO:0031295	T cell costimulation	1/19	55/17913	0.0567809	0.114307	0.0647393	LGALS1	1
GO:0042982	amyloid precursor protein metabolic process	1/19	55/17913	0.0567809	0.114307	0.0647393	APOE	1
GO:0014888	striated muscle adaptation	1/19	56/17913	0.0577844	0.11482	0.0650297	IGFBP5	1
GO:0031294	lymphocyte costimulation	1/19	56/17913	0.0577844	0.11482	0.0650297	LGALS1	1
GO:0033344	cholesterol efflux	1/19	56/17913	0.0577844	0.11482	0.0650297	APOE	1
GO:0061098	positive regulation of protein tyrosine kinase activity	1/19	56/17913	0.0577844	0.11482	0.0650297	GAS6	1
GO:0071398	cellular response to fatty acid	1/19	56/17913	0.0577844	0.11482	0.0650297	TNC	1
GO:0006879	cellular iron ion homeostasis	1/19	57/17913	0.058787	0.11631	0.0658733	CP	1
GO:0051055	negative regulation of lipid biosynthetic process	1/19	57/17913	0.058787	0.11631	0.0658733	APOE	1
GO:0010324	membrane invagination	1/19	58/17913	0.0597885	0.117282	0.0664242	MFGE8	1
GO:0032370	positive regulation of lipid transport	1/19	58/17913	0.0597885	0.117282	0.0664242	APOE	1
GO:0070527	platelet aggregation	1/19	58/17913	0.0597885	0.117282	0.0664242	GAS6	1
GO:1903902	positive regulation of viral life cycle	1/19	59/17913	0.060789	0.118739	0.067249	LGALS1	1
GO:2000351	regulation of endothelial cell apoptotic process	1/19	59/17913	0.060789	0.118739	0.067249	GAS6	1
GO:0032371	regulation of sterol transport	1/19	60/17913	0.0617885	0.119675	0.0677791	APOE	1
GO:0032374	regulation of cholesterol transport	1/19	60/17913	0.0617885	0.119675	0.0677791	APOE	1
GO:0046824	positive regulation of nucleocytoplasmic transport	1/19	60/17913	0.0617885	0.119675	0.0677791	GAS6	1
GO:0050701	interleukin-1 secretion	1/19	60/17913	0.0617885	0.119675	0.0677791	GAS6	1
GO:0006027	glycosaminoglycan catabolic process	1/19	61/17913	0.062787	0.120361	0.0681678	BGN	1
GO:0010803	regulation of tumor necrosis factor-mediated signaling pathway	1/19	61/17913	0.062787	0.120361	0.0681678	GAS6	1
GO:0014032	neural crest cell development	1/19	61/17913	0.062787	0.120361	0.0681678	FN1	1
GO:0033627	cell adhesion mediated by integrin	1/19	61/17913	0.062787	0.120361	0.0681678	FBN1	1
GO:1901862	negative regulation of muscle tissue development	1/19	62/17913	0.0637845	0.121999	0.0690958	IGFBP5	1
GO:0006026	aminoglycan catabolic process	1/19	63/17913	0.0647809	0.122883	0.0695964	BGN	1
GO:0030101	natural killer cell activation	1/19	63/17913	0.0647809	0.122883	0.0695964	GAS6	1
GO:0090181	regulation of cholesterol metabolic process	1/19	63/17913	0.0647809	0.122883	0.0695964	APOE	1
GO:0015909	long-chain fatty acid transport	1/19	64/17913	0.0657764	0.123499	0.0699448	APOE	1
GO:0015914	phospholipid transport	1/19	64/17913	0.0657764	0.123499	0.0699448	APOE	1
GO:0019915	lipid storage	1/19	64/17913	0.0657764	0.123499	0.0699448	APOE	1
GO:0032768	regulation of monooxygenase activity	1/19	64/17913	0.0657764	0.123499	0.0699448	APOE	1
GO:0045670	regulation of osteoclast differentiation	1/19	64/17913	0.0657764	0.123499	0.0699448	FBN1	1
GO:0014031	mesenchymal cell development	1/19	65/17913	0.0667709	0.124212	0.070349	FN1	1
GO:0048864	stem cell development	1/19	65/17913	0.0667709	0.124212	0.070349	FN1	1
GO:0072577	endothelial cell apoptotic process	1/19	65/17913	0.0667709	0.124212	0.070349	GAS6	1
GO:0061515	myeloid cell development	1/19	68/17913	0.0697483	0.129372	0.0732712	FBN1	1
GO:0032720	negative regulation of tumor necrosis factor production	1/19	69/17913	0.0707387	0.130159	0.0737172	GAS6	1
GO:0048662	negative regulation of smooth muscle cell proliferation	1/19	69/17913	0.0707387	0.130159	0.0737172	IGFBP5	1
GO:0050795	regulation of behavior	1/19	69/17913	0.0707387	0.130159	0.0737172	APOE	1
GO:1900006	positive regulation of dendrite development	1/19	69/17913	0.0707387	0.130159	0.0737172	APOE	1
GO:0014033	neural crest cell differentiation	1/19	70/17913	0.0717282	0.131226	0.0743213	FN1	1
GO:0034381	plasma lipoprotein particle clearance	1/19	70/17913	0.0717282	0.131226	0.0743213	APOE	1
GO:0001960	negative regulation of cytokine-mediated signaling pathway	1/19	71/17913	0.0727166	0.131226	0.0743213	GAS6	1
GO:0002312	B cell activation involved in immune response	1/19	71/17913	0.0727166	0.131226	0.0743213	LGALS1	1
GO:0033555	multicellular organismal response to stress	1/19	71/17913	0.0727166	0.131226	0.0743213	APOE	1
GO:0043407	negative regulation of MAP kinase activity	1/19	71/17913	0.0727166	0.131226	0.0743213	APOE	1
GO:0060998	regulation of dendritic spine development	1/19	71/17913	0.0727166	0.131226	0.0743213	APOE	1
GO:1903556	negative regulation of tumor necrosis factor superfamily cytokine production	1/19	71/17913	0.0727166	0.131226	0.0743213	GAS6	1
GO:0006695	cholesterol biosynthetic process	1/19	72/17913	0.0737041	0.131922	0.0747154	APOE	1
GO:0050772	positive regulation of axonogenesis	1/19	72/17913	0.0737041	0.131922	0.0747154	FN1	1
GO:0051651	maintenance of location in cell	1/19	72/17913	0.0737041	0.131922	0.0747154	APOE	1
GO:1902653	secondary alcohol biosynthetic process	1/19	72/17913	0.0737041	0.131922	0.0747154	APOE	1
GO:0007492	endoderm development	1/19	73/17913	0.0746906	0.133169	0.0754219	FN1	1
GO:0061045	negative regulation of wound healing	1/19	73/17913	0.0746906	0.133169	0.0754219	APOE	1
GO:0030193	regulation of blood coagulation	1/19	74/17913	0.0756761	0.133888	0.0758292	APOE	1
GO:0055072	iron ion homeostasis	1/19	74/17913	0.0756761	0.133888	0.0758292	CP	1
GO:0060291	long-term synaptic potentiation	1/19	74/17913	0.0756761	0.133888	0.0758292	APOE	1
GO:0001937	negative regulation of endothelial cell proliferation	1/19	75/17913	0.0766605	0.134595	0.0762293	APOE	1
GO:0016126	sterol biosynthetic process	1/19	75/17913	0.0766605	0.134595	0.0762293	APOE	1
GO:0031100	animal organ regeneration	1/19	75/17913	0.0766605	0.134595	0.0762293	GAS6	1
GO:1900046	regulation of hemostasis	1/19	75/17913	0.0766605	0.134595	0.0762293	APOE	1
GO:0048844	artery morphogenesis	1/19	76/17913	0.077644	0.136062	0.0770602	APOE	1
GO:0030279	negative regulation of ossification	1/19	77/17913	0.0786265	0.136316	0.077204	IGFBP5	1
GO:0051851	modification by host of symbiont morphology or physiology	1/19	77/17913	0.0786265	0.136316	0.077204	APOE	1
GO:0060761	negative regulation of response to cytokine stimulus	1/19	77/17913	0.0786265	0.136316	0.077204	GAS6	1
GO:0071260	cellular response to mechanical stimulus	1/19	77/17913	0.0786265	0.136316	0.077204	COL1A1	1
GO:0097061	dendritic spine organization	1/19	77/17913	0.0786265	0.136316	0.077204	APOE	1
GO:0022617	extracellular matrix disassembly	1/19	78/17913	0.079608	0.136896	0.0775327	TIMP1	1
GO:0030512	negative regulation of transforming growth factor beta receptor signaling pathway	1/19	78/17913	0.079608	0.136896	0.0775327	FBN1	1
GO:1905954	positive regulation of lipid localization	1/19	78/17913	0.079608	0.136896	0.0775327	APOE	1
GO:0006029	proteoglycan metabolic process	1/19	79/17913	0.0805885	0.137554	0.0779051	BGN	1
GO:0014743	regulation of muscle hypertrophy	1/19	79/17913	0.0805885	0.137554	0.0779051	IGFBP5	1
GO:0043154	negative regulation of cysteine-type endopeptidase activity involved in apoptotic process	1/19	79/17913	0.0805885	0.137554	0.0779051	GAS6	1
GO:0050818	regulation of coagulation	1/19	79/17913	0.0805885	0.137554	0.0779051	APOE	1
GO:1903845	negative regulation of cellular response to transforming growth factor beta stimulus	1/19	80/17913	0.0815681	0.138968	0.078706	FBN1	1
GO:0002690	positive regulation of leukocyte chemotaxis	1/19	81/17913	0.0825466	0.13909	0.0787749	GAS6	1
GO:0030510	regulation of BMP signaling pathway	1/19	81/17913	0.0825466	0.13909	0.0787749	FBN1	1
GO:0043537	negative regulation of blood vessel endothelial cell migration	1/19	81/17913	0.0825466	0.13909	0.0787749	APOE	1
GO:0046889	positive regulation of lipid biosynthetic process	1/19	81/17913	0.0825466	0.13909	0.0787749	APOE	1
GO:1902930	regulation of alcohol biosynthetic process	1/19	81/17913	0.0825466	0.13909	0.0787749	APOE	1
GO:0042158	lipoprotein biosynthetic process	1/19	82/17913	0.0835241	0.139713	0.0791281	APOE	1
GO:0045445	myoblast differentiation	1/19	82/17913	0.0835241	0.139713	0.0791281	LGALS1	1
GO:2000106	regulation of leukocyte apoptotic process	1/19	82/17913	0.0835241	0.139713	0.0791281	GAS6	1
GO:0003073	regulation of systemic arterial blood pressure	1/19	83/17913	0.0845007	0.140835	0.0797632	GAS6	1
GO:0046916	cellular transition metal ion homeostasis	1/19	83/17913	0.0845007	0.140835	0.0797632	CP	1
GO:0001942	hair follicle development	1/19	85/17913	0.0864509	0.14228	0.0805822	IGFBP5	1
GO:0014910	regulation of smooth muscle cell migration	1/19	85/17913	0.0864509	0.14228	0.0805822	IGFBP5	1
GO:0042475	odontogenesis of dentin-containing tooth	1/19	85/17913	0.0864509	0.14228	0.0805822	TNC	1
GO:0045185	maintenance of protein location	1/19	85/17913	0.0864509	0.14228	0.0805822	FBN1	1
GO:0070542	response to fatty acid	1/19	85/17913	0.0864509	0.14228	0.0805822	TNC	1
GO:0106027	neuron projection organization	1/19	85/17913	0.0864509	0.14228	0.0805822	APOE	1
GO:0033138	positive regulation of peptidyl-serine phosphorylation	1/19	86/17913	0.0874245	0.142607	0.0807673	GAS6	1
GO:0034446	substrate adhesion-dependent cell spreading	1/19	86/17913	0.0874245	0.142607	0.0807673	FN1	1
GO:0061097	regulation of protein tyrosine kinase activity	1/19	86/17913	0.0874245	0.142607	0.0807673	GAS6	1
GO:0022404	molting cycle process	1/19	87/17913	0.0883971	0.142676	0.0808062	IGFBP5	1
GO:0022405	hair cycle process	1/19	87/17913	0.0883971	0.142676	0.0808062	IGFBP5	1
GO:0072676	lymphocyte migration	1/19	87/17913	0.0883971	0.142676	0.0808062	GAS6	1
GO:0098773	skin epidermis development	1/19	87/17913	0.0883971	0.142676	0.0808062	IGFBP5	1
GO:1903035	negative regulation of response to wounding	1/19	87/17913	0.0883971	0.142676	0.0808062	APOE	1
GO:2000117	negative regulation of cysteine-type endopeptidase activity	1/19	87/17913	0.0883971	0.142676	0.0808062	GAS6	1
GO:0009791	post-embryonic development	1/19	88/17913	0.0893687	0.142742	0.0808434	FBN1	1
GO:0070167	regulation of biomineral tissue development	1/19	88/17913	0.0893687	0.142742	0.0808434	GAS6	1
GO:0097306	cellular response to alcohol	1/19	88/17913	0.0893687	0.142742	0.0808434	TNC	1
GO:1904035	regulation of epithelial cell apoptotic process	1/19	88/17913	0.0893687	0.142742	0.0808434	GAS6	1
GO:1904705	regulation of vascular smooth muscle cell proliferation	1/19	88/17913	0.0893687	0.142742	0.0808434	IGFBP5	1
GO:1990874	vascular smooth muscle cell proliferation	1/19	88/17913	0.0893687	0.142742	0.0808434	IGFBP5	1
GO:0015908	fatty acid transport	1/19	90/17913	0.0913091	0.144873	0.0820505	APOE	1
GO:0060349	bone morphogenesis	1/19	90/17913	0.0913091	0.144873	0.0820505	COL1A1	1
GO:0000041	transition metal ion transport	1/19	91/17913	0.0922778	0.144873	0.0820505	CP	1
GO:0001523	retinoid metabolic process	1/19	91/17913	0.0922778	0.144873	0.0820505	APOE	1
GO:0001656	metanephros development	1/19	91/17913	0.0922778	0.144873	0.0820505	FBN1	1
GO:0010717	regulation of epithelial to mesenchymal transition	1/19	91/17913	0.0922778	0.144873	0.0820505	COL1A1	1
GO:0014909	smooth muscle cell migration	1/19	91/17913	0.0922778	0.144873	0.0820505	IGFBP5	1
GO:0042632	cholesterol homeostasis	1/19	91/17913	0.0922778	0.144873	0.0820505	APOE	1
GO:0045833	negative regulation of lipid metabolic process	1/19	91/17913	0.0922778	0.144873	0.0820505	APOE	1
GO:1901655	cellular response to ketone	1/19	91/17913	0.0922778	0.144873	0.0820505	TNC	1
GO:0045638	negative regulation of myeloid cell differentiation	1/19	92/17913	0.0932455	0.145894	0.0826289	FBN1	1
GO:0055092	sterol homeostasis	1/19	92/17913	0.0932455	0.145894	0.0826289	APOE	1
GO:0032092	positive regulation of protein binding	1/19	93/17913	0.0942122	0.146411	0.0829215	APOE	1
GO:0032649	regulation of interferon-gamma production	1/19	93/17913	0.0942122	0.146411	0.0829215	GAS6	1
GO:0044070	regulation of anion transport	1/19	93/17913	0.0942122	0.146411	0.0829215	APOE	1
GO:0045621	positive regulation of lymphocyte differentiation	1/19	93/17913	0.0942122	0.146411	0.0829215	GAS6	1
GO:0007229	integrin-mediated signaling pathway	1/19	94/17913	0.095178	0.146673	0.0830699	TIMP1	1
GO:0015748	organophosphate ester transport	1/19	94/17913	0.095178	0.146673	0.0830699	APOE	1
GO:0030316	osteoclast differentiation	1/19	94/17913	0.095178	0.146673	0.0830699	FBN1	1
GO:0060996	dendritic spine development	1/19	94/17913	0.095178	0.146673	0.0830699	APOE	1
GO:0006641	triglyceride metabolic process	1/19	95/17913	0.0961428	0.147912	0.0837717	APOE	1
GO:0007044	cell-substrate junction assembly	1/19	96/17913	0.0971066	0.148897	0.0843294	FN1	1
GO:0032652	regulation of interleukin-1 production	1/19	96/17913	0.0971066	0.148897	0.0843294	GAS6	1
GO:0016101	diterpenoid metabolic process	1/19	97/17913	0.0980695	0.149874	0.0848826	APOE	1
GO:0030301	cholesterol transport	1/19	98/17913	0.0990313	0.150593	0.0852901	APOE	1
GO:0032006	regulation of TOR signaling	1/19	98/17913	0.0990313	0.150593	0.0852901	GAS6	1
GO:0099175	regulation of postsynapse organization	1/19	98/17913	0.0990313	0.150593	0.0852901	APOE	1
GO:0010596	negative regulation of endothelial cell migration	1/19	99/17913	0.0999922	0.151304	0.0856928	APOE	1
GO:0098869	cellular oxidant detoxification	1/19	99/17913	0.0999922	0.151304	0.0856928	APOE	1
GO:1902106	negative regulation of leukocyte differentiation	1/19	99/17913	0.0999922	0.151304	0.0856928	FBN1	1
GO:0046822	regulation of nucleocytoplasmic transport	1/19	100/17913	0.100952	0.152256	0.0862318	GAS6	1
GO:0060840	artery development	1/19	100/17913	0.100952	0.152256	0.0862318	APOE	1
GO:0002367	cytokine production involved in immune response	1/19	101/17913	0.101911	0.1532	0.0867664	GAS6	1
GO:0048661	positive regulation of smooth muscle cell proliferation	1/19	101/17913	0.101911	0.1532	0.0867664	IGFBP5	1
GO:0097006	regulation of plasma lipoprotein particle levels	1/19	102/17913	0.102869	0.154388	0.0874392	APOE	1
GO:0014812	muscle cell migration	1/19	103/17913	0.103826	0.155317	0.0879656	IGFBP5	1
GO:0071887	leukocyte apoptotic process	1/19	103/17913	0.103826	0.155317	0.0879656	GAS6	1
GO:0002688	regulation of leukocyte chemotaxis	1/19	105/17913	0.105737	0.157154	0.0890059	GAS6	1
GO:0032609	interferon-gamma production	1/19	105/17913	0.105737	0.157154	0.0890059	GAS6	1
GO:0051341	regulation of oxidoreductase activity	1/19	105/17913	0.105737	0.157154	0.0890059	APOE	1
GO:0055076	transition metal ion homeostasis	1/19	105/17913	0.105737	0.157154	0.0890059	CP	1
GO:0006721	terpenoid metabolic process	1/19	106/17913	0.106691	0.158061	0.0895198	APOE	1
GO:0043502	regulation of muscle adaptation	1/19	106/17913	0.106691	0.158061	0.0895198	IGFBP5	1
GO:0006024	glycosaminoglycan biosynthetic process	1/19	107/17913	0.107645	0.158453	0.0897415	BGN	1
GO:0015918	sterol transport	1/19	107/17913	0.107645	0.158453	0.0897415	APOE	1
GO:0062014	negative regulation of small molecule metabolic process	1/19	107/17913	0.107645	0.158453	0.0897415	APOE	1
GO:1990748	cellular detoxification	1/19	107/17913	0.107645	0.158453	0.0897415	APOE	1
GO:0006023	aminoglycan biosynthetic process	1/19	108/17913	0.108597	0.159091	0.0901029	BGN	1
GO:0030282	bone mineralization	1/19	108/17913	0.108597	0.159091	0.0901029	COL1A2	1
GO:0032612	interleukin-1 production	1/19	108/17913	0.108597	0.159091	0.0901029	GAS6	1
GO:0042303	molting cycle	1/19	109/17913	0.109548	0.159975	0.0906036	IGFBP5	1
GO:0042633	hair cycle	1/19	109/17913	0.109548	0.159975	0.0906036	IGFBP5	1
GO:0010811	positive regulation of cell-substrate adhesion	1/19	110/17913	0.110498	0.161107	0.0912447	FN1	1
GO:0014897	striated muscle hypertrophy	1/19	111/17913	0.111448	0.161722	0.0915931	IGFBP5	1
GO:0021782	glial cell development	1/19	111/17913	0.111448	0.161722	0.0915931	MXRA8	1
GO:1904019	epithelial cell apoptotic process	1/19	111/17913	0.111448	0.161722	0.0915931	GAS6	1
GO:0007613	memory	1/19	112/17913	0.112396	0.16233	0.0919375	APOE	1
GO:0042157	lipoprotein metabolic process	1/19	112/17913	0.112396	0.16233	0.0919375	APOE	1
GO:1903510	mucopolysaccharide metabolic process	1/19	112/17913	0.112396	0.16233	0.0919375	BGN	1
GO:0006639	acylglycerol metabolic process	1/19	113/17913	0.113343	0.162423	0.0919904	APOE	1
GO:0014896	muscle hypertrophy	1/19	113/17913	0.113343	0.162423	0.0919904	IGFBP5	1
GO:0030183	B cell differentiation	1/19	113/17913	0.113343	0.162423	0.0919904	LGALS1	1
GO:0051817	modification of morphology or physiology of other organism involved in symbiotic interaction	1/19	113/17913	0.113343	0.162423	0.0919904	APOE	1
GO:0098754	detoxification	1/19	113/17913	0.113343	0.162423	0.0919904	APOE	1
GO:0006638	neutral lipid metabolic process	1/19	114/17913	0.11429	0.163525	0.0926142	APOE	1
GO:0017015	regulation of transforming growth factor beta receptor signaling pathway	1/19	115/17913	0.115235	0.164622	0.0932354	FBN1	1
GO:0010633	negative regulation of epithelial cell migration	1/19	116/17913	0.11618	0.165457	0.0937086	APOE	1
GO:0031929	TOR signaling	1/19	116/17913	0.11618	0.165457	0.0937086	GAS6	1
GO:0001704	formation of primary germ layer	1/19	117/17913	0.117123	0.16552	0.0937441	FN1	1
GO:0002761	regulation of myeloid leukocyte differentiation	1/19	117/17913	0.117123	0.16552	0.0937441	FBN1	1
GO:0048706	embryonic skeletal system development	1/19	117/17913	0.117123	0.16552	0.0937441	COL1A1	1
GO:0061025	membrane fusion	1/19	117/17913	0.117123	0.16552	0.0937441	GAS6	1
GO:1903844	regulation of cellular response to transforming growth factor beta stimulus	1/19	117/17913	0.117123	0.16552	0.0937441	FBN1	1
GO:0033135	regulation of peptidyl-serine phosphorylation	1/19	119/17913	0.119008	0.167925	0.0951061	GAS6	1
GO:0003014	renal system process	1/19	120/17913	0.119948	0.168735	0.0955647	GAS6	1
GO:0019079	viral genome replication	1/19	120/17913	0.119948	0.168735	0.0955647	GAS6	1
GO:0002687	positive regulation of leukocyte migration	1/19	121/17913	0.120888	0.169023	0.095728	GAS6	1
GO:0006720	isoprenoid metabolic process	1/19	121/17913	0.120888	0.169023	0.095728	APOE	1
GO:0043500	muscle adaptation	1/19	121/17913	0.120888	0.169023	0.095728	IGFBP5	1
GO:0090101	negative regulation of transmembrane receptor protein serine/threonine kinase signaling pathway	1/19	121/17913	0.120888	0.169023	0.095728	FBN1	1
GO:0032368	regulation of lipid transport	1/19	122/17913	0.121827	0.169819	0.096179	APOE	1
GO:1902904	negative regulation of supramolecular fiber organization	1/19	122/17913	0.121827	0.169819	0.096179	APOE	1
GO:0008360	regulation of cell shape	1/19	124/17913	0.123702	0.171652	0.0972172	FN1	1
GO:0035023	regulation of Rho protein signal transduction	1/19	124/17913	0.123702	0.171652	0.0972172	APOE	1
GO:0042177	negative regulation of protein catabolic process	1/19	124/17913	0.123702	0.171652	0.0972172	TIMP1	1
GO:0035296	regulation of tube diameter	1/19	125/17913	0.124637	0.172431	0.0976582	APOE	1
GO:0097746	regulation of blood vessel diameter	1/19	125/17913	0.124637	0.172431	0.0976582	APOE	1
GO:0051668	localization within membrane	1/19	126/17913	0.125572	0.173463	0.0982431	APOE	1
GO:0045471	response to ethanol	1/19	127/17913	0.126507	0.174492	0.0988254	TNC	1
GO:0032355	response to estradiol	1/19	128/17913	0.12744	0.175253	0.0992568	COL1A1	1
GO:0045667	regulation of osteoblast differentiation	1/19	128/17913	0.12744	0.175253	0.0992568	IGFBP5	1
GO:0008037	cell recognition	1/19	129/17913	0.128372	0.176009	0.0996848	MFGE8	1
GO:1903364	positive regulation of cellular protein catabolic process	1/19	129/17913	0.128372	0.176009	0.0996848	APOE	1
GO:0050921	positive regulation of chemotaxis	1/19	130/17913	0.129303	0.177022	0.100258	GAS6	1
GO:0055088	lipid homeostasis	1/19	132/17913	0.131163	0.179301	0.101549	APOE	1
GO:0050880	regulation of blood vessel size	1/19	133/17913	0.132091	0.180302	0.102116	APOE	1
GO:0035150	regulation of tube size	1/19	134/17913	0.133019	0.181299	0.102681	APOE	1
GO:0090263	positive regulation of canonical Wnt signaling pathway	1/19	135/17913	0.133945	0.182023	0.103091	COL1A1	1
GO:2000241	regulation of reproductive process	1/19	135/17913	0.133945	0.182023	0.103091	TIMP1	1
GO:0009267	cellular response to starvation	1/19	136/17913	0.134871	0.182741	0.103497	GAS6	1
GO:0071901	negative regulation of protein serine/threonine kinase activity	1/19	136/17913	0.134871	0.182741	0.103497	APOE	1
GO:0015718	monocarboxylic acid transport	1/19	137/17913	0.135795	0.183723	0.104054	APOE	1
GO:0010770	positive regulation of cell morphogenesis involved in differentiation	1/19	138/17913	0.136719	0.18416	0.104301	FN1	1
GO:0030879	mammary gland development	1/19	138/17913	0.136719	0.18416	0.104301	IGFBP5	1
GO:0044344	cellular response to fibroblast growth factor stimulus	1/19	138/17913	0.136719	0.18416	0.104301	COL1A1	1
GO:0007605	sensory perception of sound	1/19	139/17913	0.137642	0.184324	0.104394	COL1A1	1
GO:0032675	regulation of interleukin-6 production	1/19	139/17913	0.137642	0.184324	0.104394	GAS6	1
GO:0050773	regulation of dendrite development	1/19	139/17913	0.137642	0.184324	0.104394	APOE	1
GO:0051384	response to glucocorticoid	1/19	139/17913	0.137642	0.184324	0.104394	IGFBP7	1
GO:0001837	epithelial to mesenchymal transition	1/19	140/17913	0.138564	0.184752	0.104636	COL1A1	1
GO:0007338	single fertilization	1/19	140/17913	0.138564	0.184752	0.104636	MFGE8	1
GO:0017038	protein import	1/19	140/17913	0.138564	0.184752	0.104636	APOE	1
GO:0008203	cholesterol metabolic process	1/19	143/17913	0.141324	0.187616	0.106258	APOE	1
GO:0061041	regulation of wound healing	1/19	143/17913	0.141324	0.187616	0.106258	APOE	1
GO:1902107	positive regulation of leukocyte differentiation	1/19	143/17913	0.141324	0.187616	0.106258	GAS6	1
GO:0042542	response to hydrogen peroxide	1/19	144/17913	0.142242	0.188291	0.106641	COL1A1	1
GO:0045834	positive regulation of lipid metabolic process	1/19	144/17913	0.142242	0.188291	0.106641	APOE	1
GO:0046165	alcohol biosynthetic process	1/19	145/17913	0.143159	0.188691	0.106867	APOE	1
GO:0048592	eye morphogenesis	1/19	145/17913	0.143159	0.188691	0.106867	FBN1	1
GO:0050806	positive regulation of synaptic transmission	1/19	145/17913	0.143159	0.188691	0.106867	APOE	1
GO:0048754	branching morphogenesis of an epithelial tube	1/19	146/17913	0.144075	0.189627	0.107397	TNC	1
GO:1902652	secondary alcohol metabolic process	1/19	147/17913	0.14499	0.190287	0.107771	APOE	1
GO:1903900	regulation of viral life cycle	1/19	147/17913	0.14499	0.190287	0.107771	LGALS1	1
GO:0032635	interleukin-6 production	1/19	149/17913	0.146818	0.192411	0.108974	GAS6	1
GO:0090316	positive regulation of intracellular protein transport	1/19	150/17913	0.147731	0.193332	0.109496	GAS6	1
GO:0032680	regulation of tumor necrosis factor production	1/19	151/17913	0.148642	0.193973	0.109859	GAS6	1
GO:1905952	regulation of lipid localization	1/19	151/17913	0.148642	0.193973	0.109859	APOE	1
GO:0001764	neuron migration	1/19	152/17913	0.149553	0.194335	0.110064	GAS6	1
GO:1901861	regulation of muscle tissue development	1/19	152/17913	0.149553	0.194335	0.110064	IGFBP5	1
GO:1903707	negative regulation of hemopoiesis	1/19	152/17913	0.149553	0.194335	0.110064	FBN1	1
GO:0016125	sterol metabolic process	1/19	155/17913	0.15228	0.197043	0.111597	APOE	1
GO:0032640	tumor necrosis factor production	1/19	155/17913	0.15228	0.197043	0.111597	GAS6	1
GO:1903555	regulation of tumor necrosis factor superfamily cytokine production	1/19	155/17913	0.15228	0.197043	0.111597	GAS6	1
GO:0090288	negative regulation of cellular response to growth factor stimulus	1/19	156/17913	0.153187	0.197938	0.112104	FBN1	1
GO:0030203	glycosaminoglycan metabolic process	1/19	157/17913	0.154093	0.198829	0.112609	BGN	1
GO:0002285	lymphocyte activation involved in immune response	1/19	158/17913	0.154998	0.198882	0.112639	LGALS1	1
GO:0009408	response to heat	1/19	158/17913	0.154998	0.198882	0.112639	IGFBP7	1
GO:0043535	regulation of blood vessel endothelial cell migration	1/19	158/17913	0.154998	0.198882	0.112639	APOE	1
GO:0099173	postsynapse organization	1/19	158/17913	0.154998	0.198882	0.112639	APOE	1
GO:0050954	sensory perception of mechanical stimulus	1/19	159/17913	0.155902	0.199763	0.113138	COL1A1	1
GO:0035821	modification of morphology or physiology of other organism	1/19	160/17913	0.156806	0.200641	0.113636	APOE	1
GO:0003018	vascular process in circulatory system	1/19	161/17913	0.157708	0.200958	0.113815	APOE	1
GO:0006022	aminoglycan metabolic process	1/19	161/17913	0.157708	0.200958	0.113815	BGN	1
GO:0071706	tumor necrosis factor superfamily cytokine production	1/19	161/17913	0.157708	0.200958	0.113815	GAS6	1
GO:0006611	protein export from nucleus	1/19	163/17913	0.15951	0.202692	0.114797	GAS6	1
GO:0050680	negative regulation of epithelial cell proliferation	1/19	163/17913	0.15951	0.202692	0.114797	APOE	1
GO:0045619	regulation of lymphocyte differentiation	1/19	164/17913	0.16041	0.203554	0.115285	GAS6	1
GO:0019935	cyclic-nucleotide-mediated signaling	1/19	166/17913	0.162206	0.205268	0.116256	APOE	1
GO:0030307	positive regulation of cell growth	1/19	166/17913	0.162206	0.205268	0.116256	FN1	1
GO:0033209	tumor necrosis factor-mediated signaling pathway	1/19	167/17913	0.163103	0.205837	0.116578	GAS6	1
GO:0061136	regulation of proteasomal protein catabolic process	1/19	167/17913	0.163103	0.205837	0.116578	APOE	1
GO:0048167	regulation of synaptic plasticity	1/19	169/17913	0.164895	0.207518	0.11753	APOE	1
GO:0001936	regulation of endothelial cell proliferation	1/19	170/17913	0.165789	0.207518	0.11753	APOE	1
GO:0001959	regulation of cytokine-mediated signaling pathway	1/19	170/17913	0.165789	0.207518	0.11753	GAS6	1
GO:0009566	fertilization	1/19	170/17913	0.165789	0.207518	0.11753	MFGE8	1
GO:0030177	positive regulation of Wnt signaling pathway	1/19	170/17913	0.165789	0.207518	0.11753	COL1A1	1
GO:0050728	negative regulation of inflammatory response	1/19	170/17913	0.165789	0.207518	0.11753	APOE	1
GO:0043433	negative regulation of DNA-binding transcription factor activity	1/19	171/17913	0.166682	0.208353	0.118003	GAS6	1
GO:0006888	ER to Golgi vesicle-mediated transport	1/19	172/17913	0.167574	0.208618	0.118153	GAS6	1
GO:0043123	positive regulation of I-kappaB kinase/NF-kappaB signaling	1/19	172/17913	0.167574	0.208618	0.118153	LGALS1	1
GO:0048660	regulation of smooth muscle cell proliferation	1/19	172/17913	0.167574	0.208618	0.118153	IGFBP5	1
GO:1903034	regulation of response to wounding	1/19	173/17913	0.168466	0.209444	0.118621	APOE	1
GO:0048659	smooth muscle cell proliferation	1/19	174/17913	0.169357	0.210267	0.119087	IGFBP5	1
GO:0051168	nuclear export	1/19	176/17913	0.171135	0.211903	0.120014	GAS6	1
GO:1901136	carbohydrate derivative catabolic process	1/19	176/17913	0.171135	0.211903	0.120014	BGN	1
GO:0043112	receptor metabolic process	1/19	177/17913	0.172023	0.212716	0.120474	APOE	1
GO:0007369	gastrulation	1/19	178/17913	0.17291	0.21324	0.120771	FN1	1
GO:0061138	morphogenesis of a branching epithelium	1/19	178/17913	0.17291	0.21324	0.120771	TNC	1
GO:0043409	negative regulation of MAPK cascade	1/19	179/17913	0.173796	0.214046	0.121227	APOE	1
GO:0010952	positive regulation of peptidase activity	1/19	180/17913	0.174681	0.214848	0.121682	FN1	1
GO:0051099	positive regulation of binding	1/19	181/17913	0.175565	0.215648	0.122135	APOE	1
GO:0043534	blood vessel endothelial cell migration	1/19	182/17913	0.176449	0.215868	0.122259	APOE	1
GO:0043901	negative regulation of multi-organism process	1/19	182/17913	0.176449	0.215868	0.122259	TIMP1	1
GO:1903708	positive regulation of hemopoiesis	1/19	182/17913	0.176449	0.215868	0.122259	GAS6	1
GO:0048639	positive regulation of developmental growth	1/19	183/17913	0.177331	0.216372	0.122545	FN1	1
GO:0060759	regulation of response to cytokine stimulus	1/19	183/17913	0.177331	0.216372	0.122545	GAS6	1
GO:0050731	positive regulation of peptidyl-tyrosine phosphorylation	1/19	184/17913	0.178213	0.21716	0.122991	GAS6	1
GO:0001935	endothelial cell proliferation	1/19	185/17913	0.179094	0.217657	0.123272	APOE	1
GO:1902905	positive regulation of supramolecular fiber organization	1/19	185/17913	0.179094	0.217657	0.123272	APOE	1
GO:0002685	regulation of leukocyte migration	1/19	186/17913	0.179973	0.21815	0.123552	GAS6	1
GO:0050920	regulation of chemotaxis	1/19	186/17913	0.179973	0.21815	0.123552	GAS6	1
GO:0050866	negative regulation of cell activation	1/19	187/17913	0.180852	0.218927	0.123992	APOE	1
GO:0030595	leukocyte chemotaxis	1/19	188/17913	0.18173	0.2197	0.12443	GAS6	1
GO:0044272	sulfur compound biosynthetic process	1/19	190/17913	0.183484	0.221529	0.125465	BGN	1
GO:0002440	production of molecular mediator of immune response	1/19	191/17913	0.184359	0.222294	0.125899	GAS6	1
GO:0001763	morphogenesis of a branching structure	1/19	192/17913	0.185234	0.222474	0.126001	TNC	1
GO:0030258	lipid modification	1/19	192/17913	0.185234	0.222474	0.126001	APOE	1
GO:0045732	positive regulation of protein catabolic process	1/19	192/17913	0.185234	0.222474	0.126001	APOE	1
GO:0007626	locomotory behavior	1/19	194/17913	0.18698	0.224278	0.127023	APOE	1
GO:0043281	regulation of cysteine-type endopeptidase activity involved in apoptotic process	1/19	196/17913	0.188723	0.226074	0.12804	GAS6	1
GO:0017148	negative regulation of translation	1/19	198/17913	0.190462	0.227269	0.128717	IGFBP5	1
GO:0050870	positive regulation of T cell activation	1/19	198/17913	0.190462	0.227269	0.128717	LGALS1	1
GO:1903050	regulation of proteolysis involved in cellular protein catabolic process	1/19	198/17913	0.190462	0.227269	0.128717	APOE	1
GO:0030278	regulation of ossification	1/19	199/17913	0.19133	0.22801	0.129136	IGFBP5	1
GO:0002573	myeloid leukocyte differentiation	1/19	201/17913	0.193064	0.229778	0.130138	FBN1	1
GO:0032388	positive regulation of intracellular transport	1/19	203/17913	0.194794	0.231538	0.131134	GAS6	1
GO:0048705	skeletal system morphogenesis	1/19	204/17913	0.195658	0.232265	0.131546	COL1A1	1
GO:1901215	negative regulation of neuron death	1/19	207/17913	0.198244	0.235032	0.133113	APOE	1
GO:0007601	visual perception	1/19	209/17913	0.199964	0.236766	0.134095	COL1A1	1
GO:0010001	glial cell differentiation	1/19	212/17913	0.202537	0.239504	0.135646	MXRA8	1
GO:0050953	sensory perception of light stimulus	1/19	213/17913	0.203393	0.240208	0.136044	COL1A1	1
GO:0007160	cell-matrix adhesion	1/19	214/17913	0.204248	0.240292	0.136092	FN1	1
GO:0034329	cell junction assembly	1/19	214/17913	0.204248	0.240292	0.136092	FN1	1
GO:1903039	positive regulation of leukocyte cell-cell adhesion	1/19	214/17913	0.204248	0.240292	0.136092	LGALS1	1
GO:0042113	B cell activation	1/19	215/17913	0.205103	0.240375	0.136139	LGALS1	1
GO:0046578	regulation of Ras protein signal transduction	1/19	215/17913	0.205103	0.240375	0.136139	APOE	1
GO:0090092	regulation of transmembrane receptor protein serine/threonine kinase signaling pathway	1/19	215/17913	0.205103	0.240375	0.136139	FBN1	1
GO:0016358	dendrite development	1/19	216/17913	0.205956	0.241068	0.136532	APOE	1
GO:0043393	regulation of protein binding	1/19	217/17913	0.206809	0.241758	0.136923	APOE	1
GO:0050807	regulation of synapse organization	1/19	218/17913	0.20766	0.242446	0.137312	APOE	1
GO:0009266	response to temperature stimulus	1/19	219/17913	0.208511	0.243131	0.1377	IGFBP7	1
GO:0002526	acute inflammatory response	1/19	220/17913	0.209361	0.243504	0.137912	FN1	1
GO:0033157	regulation of intracellular protein transport	1/19	220/17913	0.209361	0.243504	0.137912	GAS6	1
GO:0006469	negative regulation of protein kinase activity	1/19	222/17913	0.211058	0.244551	0.138504	APOE	1
GO:0050803	regulation of synapse structure or activity	1/19	222/17913	0.211058	0.244551	0.138504	APOE	1
GO:2000116	regulation of cysteine-type endopeptidase activity	1/19	222/17913	0.211058	0.244551	0.138504	GAS6	1
GO:0034504	protein localization to nucleus	1/19	223/17913	0.211905	0.245224	0.138885	COL1A1	1
GO:0043122	regulation of I-kappaB kinase/NF-kappaB signaling	1/19	224/17913	0.212752	0.245894	0.139265	LGALS1	1
GO:0015850	organic hydroxy compound transport	1/19	228/17913	0.216129	0.249484	0.141298	APOE	1
GO:1903362	regulation of cellular protein catabolic process	1/19	230/17913	0.217813	0.251112	0.14222	APOE	1
GO:0007050	cell cycle arrest	1/19	231/17913	0.218653	0.251137	0.142234	GAS6	1
GO:0010594	regulation of endothelial cell migration	1/19	231/17913	0.218653	0.251137	0.142234	APOE	1
GO:0018105	peptidyl-serine phosphorylation	1/19	231/17913	0.218653	0.251137	0.142234	GAS6	1
GO:0098742	cell-cell adhesion via plasma-membrane adhesion molecules	1/19	233/17913	0.220331	0.252749	0.143147	SPARCL1	1
GO:0031348	negative regulation of defense response	1/19	237/17913	0.223678	0.255632	0.14478	APOE	1
GO:0048863	stem cell differentiation	1/19	237/17913	0.223678	0.255632	0.14478	FN1	1
GO:0072659	protein localization to plasma membrane	1/19	237/17913	0.223678	0.255632	0.14478	GAS6	1
GO:0097237	cellular response to toxic substance	1/19	241/17913	0.227011	0.258798	0.146573	APOE	1
GO:1901617	organic hydroxy compound biosynthetic process	1/19	241/17913	0.227011	0.258798	0.146573	APOE	1
GO:0033002	muscle cell proliferation	1/19	243/17913	0.228672	0.260347	0.14745	IGFBP5	1
GO:0031330	negative regulation of cellular catabolic process	1/19	244/17913	0.229501	0.260347	0.14745	TIMP1	1
GO:0033673	negative regulation of kinase activity	1/19	244/17913	0.229501	0.260347	0.14745	APOE	1
GO:0045926	negative regulation of growth	1/19	244/17913	0.229501	0.260347	0.14745	IGFBP5	1
GO:0050730	regulation of peptidyl-tyrosine phosphorylation	1/19	245/17913	0.23033	0.260965	0.1478	GAS6	1
GO:0007611	learning or memory	1/19	247/17913	0.231984	0.262516	0.148679	APOE	1
GO:0045637	regulation of myeloid cell differentiation	1/19	250/17913	0.23446	0.264666	0.149897	FBN1	1
GO:0090596	sensory organ morphogenesis	1/19	250/17913	0.23446	0.264666	0.149897	FBN1	1
GO:0022409	positive regulation of cell-cell adhesion	1/19	251/17913	0.235283	0.264946	0.150055	LGALS1	1
GO:0090257	regulation of muscle system process	1/19	251/17913	0.235283	0.264946	0.150055	IGFBP5	1
GO:0007249	I-kappaB kinase/NF-kappaB signaling	1/19	253/17913	0.236928	0.266146	0.150735	LGALS1	1
GO:0060326	cell chemotaxis	1/19	253/17913	0.236928	0.266146	0.150735	GAS6	1
GO:0051146	striated muscle cell differentiation	1/19	263/17913	0.2451	0.27499	0.155744	IGFBP5	1
GO:0043270	positive regulation of ion transport	1/19	266/17913	0.247535	0.277047	0.156909	APOE	1
GO:0045927	positive regulation of growth	1/19	266/17913	0.247535	0.277047	0.156909	FN1	1
GO:0051348	negative regulation of transferase activity	1/19	272/17913	0.252384	0.28213	0.159788	APOE	1
GO:0043542	endothelial cell migration	1/19	275/17913	0.254797	0.284	0.160847	APOE	1
GO:0001822	kidney development	1/19	276/17913	0.2556	0.284	0.160847	FBN1	1
GO:0048562	embryonic organ morphogenesis	1/19	276/17913	0.2556	0.284	0.160847	FBN1	1
GO:0090287	regulation of cellular response to growth factor stimulus	1/19	276/17913	0.2556	0.284	0.160847	FBN1	1
GO:1990778	protein localization to cell periphery	1/19	276/17913	0.2556	0.284	0.160847	GAS6	1
GO:0034330	cell junction organization	1/19	277/17913	0.256402	0.284547	0.161157	FN1	1
GO:0042063	gliogenesis	1/19	285/17913	0.262788	0.291283	0.164971	MXRA8	1
GO:0050890	cognition	1/19	286/17913	0.263582	0.291812	0.165271	APOE	1
GO:0009895	negative regulation of catabolic process	1/19	288/17913	0.265169	0.293216	0.166066	TIMP1	1
GO:0072001	renal system development	1/19	291/17913	0.267543	0.295486	0.167352	FBN1	1
GO:0015849	organic acid transport	1/19	293/17913	0.269122	0.296163	0.167735	APOE	1
GO:0046942	carboxylic acid transport	1/19	293/17913	0.269122	0.296163	0.167735	APOE	1
GO:0070588	calcium ion transmembrane transport	1/19	293/17913	0.269122	0.296163	0.167735	GAS6	1
GO:0010632	regulation of epithelial cell migration	1/19	294/17913	0.26991	0.296675	0.168025	APOE	1
GO:0043010	camera-type eye development	1/19	295/17913	0.270697	0.296831	0.168114	FBN1	1
GO:1903037	regulation of leukocyte cell-cell adhesion	1/19	295/17913	0.270697	0.296831	0.168114	LGALS1	1
GO:0071375	cellular response to peptide hormone stimulus	1/19	297/17913	0.272269	0.2982	0.168889	FBN1	1
GO:0006898	receptor-mediated endocytosis	1/19	301/17913	0.275404	0.301275	0.17063	APOE	1
GO:0006913	nucleocytoplasmic transport	1/19	302/17913	0.276186	0.301413	0.170709	GAS6	1
GO:0009101	glycoprotein biosynthetic process	1/19	302/17913	0.276186	0.301413	0.170709	BGN	1
GO:0032147	activation of protein kinase activity	1/19	303/17913	0.276967	0.301907	0.170989	GAS6	1
GO:0048193	Golgi vesicle transport	1/19	304/17913	0.277747	0.302399	0.171267	GAS6	1
GO:0051169	nuclear transport	1/19	305/17913	0.278526	0.302889	0.171545	GAS6	1
GO:0050863	regulation of T cell activation	1/19	307/17913	0.280083	0.304222	0.1723	LGALS1	1
GO:0071214	cellular response to abiotic stimulus	1/19	310/17913	0.282411	0.306028	0.173323	COL1A1	1
GO:0104004	cellular response to environmental stimulus	1/19	310/17913	0.282411	0.306028	0.173323	COL1A1	1
GO:0060562	epithelial tube morphogenesis	1/19	313/17913	0.284732	0.307457	0.174132	TNC	1
GO:1901214	regulation of neuron death	1/19	313/17913	0.284732	0.307457	0.174132	APOE	1
GO:1902903	regulation of supramolecular fiber organization	1/19	313/17913	0.284732	0.307457	0.174132	APOE	1
GO:0032103	positive regulation of response to external stimulus	1/19	315/17913	0.286276	0.308762	0.174871	GAS6	1
GO:0051056	regulation of small GTPase mediated signal transduction	1/19	316/17913	0.287046	0.30923	0.175136	APOE	1
GO:0072330	monocarboxylic acid biosynthetic process	1/19	318/17913	0.288585	0.310162	0.175664	BGN	1
GO:1903829	positive regulation of cellular protein localization	1/19	318/17913	0.288585	0.310162	0.175664	GAS6	1
GO:0043405	regulation of MAP kinase activity	1/19	322/17913	0.291653	0.313093	0.177324	APOE	1
GO:0007159	leukocyte cell-cell adhesion	1/19	328/17913	0.296232	0.317638	0.179898	LGALS1	1
GO:0006869	lipid transport	1/19	332/17913	0.299269	0.320521	0.181531	APOE	1
GO:0006066	alcohol metabolic process	1/19	339/17913	0.304554	0.325802	0.184522	APOE	1
GO:0031331	positive regulation of cellular catabolic process	1/19	341/17913	0.306057	0.327029	0.185217	APOE	1
GO:0001654	eye development	1/19	342/17913	0.306807	0.327451	0.185455	FBN1	1
GO:0032102	negative regulation of response to external stimulus	1/19	343/17913	0.307557	0.32787	0.185693	APOE	1
GO:0051260	protein homooligomerization	1/19	345/17913	0.309053	0.328739	0.186185	APOE	1
GO:0006790	sulfur compound metabolic process	1/19	346/17913	0.309801	0.328739	0.186185	BGN	1
GO:0018108	peptidyl-tyrosine phosphorylation	1/19	346/17913	0.309801	0.328739	0.186185	GAS6	1
GO:0150063	visual system development	1/19	346/17913	0.309801	0.328739	0.186185	FBN1	1
GO:0070997	neuron death	1/19	347/17913	0.310547	0.329151	0.186419	APOE	1
GO:0018212	peptidyl-tyrosine modification	1/19	349/17913	0.312038	0.330351	0.187098	GAS6	1
GO:0048880	sensory system development	1/19	351/17913	0.313526	0.331544	0.187774	FBN1	1
GO:0010631	epithelial cell migration	1/19	354/17913	0.315751	0.333515	0.18889	APOE	1
GO:0090132	epithelium migration	1/19	357/17913	0.31797	0.335473	0.189999	APOE	1
GO:0042692	muscle cell differentiation	1/19	359/17913	0.319446	0.336644	0.190662	IGFBP5	1
GO:0019932	second-messenger-mediated signaling	1/19	360/17913	0.320182	0.337034	0.190883	APOE	1
GO:0035690	cellular response to drug	1/19	362/17913	0.321653	0.338196	0.191541	GAS6	1
GO:0090130	tissue migration	1/19	363/17913	0.322388	0.338581	0.191759	APOE	1
GO:1901653	cellular response to peptide	1/19	364/17913	0.323121	0.338964	0.191976	FBN1	1
GO:0010876	lipid localization	1/19	366/17913	0.324586	0.340113	0.192627	APOE	1
GO:0051098	regulation of binding	1/19	368/17913	0.326048	0.341244	0.193267	APOE	1
GO:0009100	glycoprotein metabolic process	1/19	369/17913	0.326778	0.341244	0.193267	BGN	1
GO:0050678	regulation of epithelial cell proliferation	1/19	369/17913	0.326778	0.341244	0.193267	APOE	1
GO:0006874	cellular calcium ion homeostasis	1/19	375/17913	0.331141	0.345408	0.195626	APOE	1
GO:0010498	proteasomal protein catabolic process	1/19	382/17913	0.336198	0.350286	0.198388	APOE	1
GO:0046486	glycerolipid metabolic process	1/19	385/17913	0.338354	0.352133	0.199435	APOE	1
GO:0055074	calcium ion homeostasis	1/19	388/17913	0.340504	0.353913	0.200443	APOE	1
GO:0022407	regulation of cell-cell adhesion	1/19	389/17913	0.341219	0.353913	0.200443	LGALS1	1
GO:0070482	response to oxygen levels	1/19	389/17913	0.341219	0.353913	0.200443	COL1A1	1
GO:0009896	positive regulation of catabolic process	1/19	392/17913	0.343359	0.354933	0.20102	APOE	1
GO:0060537	muscle tissue development	1/19	392/17913	0.343359	0.354933	0.20102	IGFBP5	1
GO:0072503	cellular divalent inorganic cation homeostasis	1/19	392/17913	0.343359	0.354933	0.20102	APOE	1
GO:0050804	modulation of chemical synaptic transmission	1/19	393/17913	0.344071	0.35527	0.201211	APOE	1
GO:0099177	regulation of trans-synaptic signaling	1/19	394/17913	0.344783	0.355605	0.201401	APOE	1
GO:0006417	regulation of translation	1/19	397/17913	0.346912	0.357401	0.202418	IGFBP5	1
GO:0032386	regulation of intracellular transport	1/19	400/17913	0.349035	0.359186	0.203429	GAS6	1
GO:0051222	positive regulation of protein transport	1/19	403/17913	0.351152	0.360961	0.204434	GAS6	1
GO:0043254	regulation of protein complex assembly	1/19	409/17913	0.355365	0.364884	0.206656	APOE	1
GO:0030099	myeloid cell differentiation	1/19	411/17913	0.356764	0.365912	0.207238	FBN1	1
GO:0072507	divalent inorganic cation homeostasis	1/19	412/17913	0.357462	0.36622	0.207413	APOE	1
GO:0048568	embryonic organ development	1/19	413/17913	0.35816	0.366526	0.207586	FBN1	1
GO:0006816	calcium ion transport	1/19	415/17913	0.359553	0.367543	0.208162	GAS6	1
GO:0001933	negative regulation of protein phosphorylation	1/19	416/17913	0.360248	0.367845	0.208333	APOE	1
GO:0046394	carboxylic acid biosynthetic process	1/19	426/17913	0.367163	0.374076	0.211862	BGN	1
GO:0048608	reproductive structure development	1/19	426/17913	0.367163	0.374076	0.211862	TNC	1
GO:0016053	organic acid biosynthetic process	1/19	427/17913	0.367851	0.374362	0.212024	BGN	1
GO:0051090	regulation of DNA-binding transcription factor activity	1/19	429/17913	0.369224	0.374929	0.212346	GAS6	1
GO:0061458	reproductive system development	1/19	429/17913	0.369224	0.374929	0.212346	TNC	1
GO:0015711	organic anion transport	1/19	430/17913	0.369909	0.375211	0.212505	APOE	1
GO:0045088	regulation of innate immune response	1/19	440/17913	0.376725	0.381284	0.215945	APOE	1
GO:1904951	positive regulation of establishment of protein localization	1/19	440/17913	0.376725	0.381284	0.215945	GAS6	1
GO:0042110	T cell activation	1/19	443/17913	0.378757	0.382919	0.21687	LGALS1	1
GO:0003012	muscle system process	1/19	448/17913	0.382128	0.385903	0.218561	IGFBP5	1
GO:0002683	negative regulation of immune system process	1/19	451/17913	0.384142	0.387512	0.219472	FBN1	1
GO:0008544	epidermis development	1/19	452/17913	0.384812	0.387763	0.219614	IGFBP5	1
GO:0070838	divalent metal ion transport	1/19	454/17913	0.386151	0.388685	0.220137	GAS6	1
GO:0042326	negative regulation of phosphorylation	1/19	455/17913	0.386819	0.388932	0.220276	APOE	1
GO:0072511	divalent inorganic cation transport	1/19	458/17913	0.388819	0.390516	0.221174	GAS6	1
GO:0050727	regulation of inflammatory response	1/19	479/17913	0.402646	0.403523	0.22854	APOE	1
GO:0071900	regulation of protein serine/threonine kinase activity	1/19	479/17913	0.402646	0.403523	0.22854	APOE	1
GO:0022411	cellular component disassembly	1/19	492/17913	0.411057	0.411504	0.23306	TIMP1	1
GO:1901615	organic hydroxy compound metabolic process	1/19	500/17913	0.416177	0.416177	0.235707	APOE	1
