# Supplementary material for: Single-cell RNA sequencing of human femoral head in vivo
Source: Aging (Albany NY). 2021 Jun 10;13(11):15595–619. doi: 10.18632/aging.203124 (PMC8221309; doi:10.18632/aging.203124)
Supplement: Supplementary Table 6 [file aging-13-203124-s007.xlsx]

## Sheet: Sheet1
Supplementary Table 6. GO enrichment analysis for genes of module 1.
ID	Description	GeneRatio	BgRatio	pvalue	p.adjust	qvalue	geneID	Count
GO:0043062	extracellular structure organization	18/30	387/17913	4.84508e-23	4.9226e-20	3.12125e-20	TNC/BGN/APOE/FBN1/COL6A3/SPARC/DCN/LUM/GAS6/COL3A1/COL5A2/TIMP1/COL6A2/COL6A1/COL1A1/COL1A2/FMOD/COL11A1	18
GO:0030198	extracellular matrix organization	17/30	334/17913	2.54896e-22	1.29487e-19	8.21034e-20	TNC/BGN/FBN1/COL6A3/SPARC/DCN/LUM/GAS6/COL3A1/COL5A2/TIMP1/COL6A2/COL6A1/COL1A1/COL1A2/FMOD/COL11A1	17
GO:0043687	post-translational protein modification	15/30	360/17913	3.11195e-18	1.05391e-15	6.6825e-16	PRSS23/TNC/FSTL1/APOE/SPARCL1/FBN1/IGFBP4/LGALS1/MXRA8/MFGE8/GAS6/TIMP1/IGFBP7/CP/IGFBP5	15
GO:0001101	response to acid chemical	8/30	330/17913	5.01156e-08	8.48624e-06	5.38083e-06	TNC/SPARC/COL3A1/COL5A2/COL6A1/IGFBP7/COL1A1/COL1A2	8
GO:0001503	ossification	8/30	388/17913	1.7387e-07	2.20815e-05	1.40011e-05	TNC/SPARC/COL5A2/COL6A1/COL1A1/COL1A2/COL11A1/IGFBP5	8
GO:0001501	skeletal system development	8/30	479/17913	8.59854e-07	7.94193e-05	5.0357e-05	FBN1/SPARC/LUM/COL3A1/TIMP1/COL1A1/COL1A2/COL11A1	8
GO:0030199	collagen fibril organization	7/30	45/17913	7.54723e-13	1.917e-10	1.2155e-10	LUM/COL3A1/COL5A2/COL1A1/COL1A2/FMOD/COL11A1	7
GO:0071229	cellular response to acid chemical	6/30	199/17913	8.28858e-07	7.94193e-05	5.0357e-05	TNC/COL3A1/COL5A2/COL6A1/COL1A1/COL1A2	6
GO:0031667	response to nutrient levels	6/30	466/17913	0.000104802	0.00332745	0.00210982	TNC/FSTL1/APOE/SPARC/GAS6/COL1A1	6
GO:0009991	response to extracellular stimulus	6/30	498/17913	0.000150724	0.00425377	0.00269717	TNC/FSTL1/APOE/SPARC/GAS6/COL1A1	6
GO:0071230	cellular response to amino acid stimulus	5/30	64/17913	6.60372e-08	9.58482e-06	6.07741e-06	COL3A1/COL5A2/COL6A1/COL1A1/COL1A2	5
GO:0043200	response to amino acid	5/30	106/17913	8.35805e-07	7.94193e-05	5.0357e-05	COL3A1/COL5A2/COL6A1/COL1A1/COL1A2	5
GO:0030168	platelet activation	5/30	152/17913	4.94543e-06	0.000314035	0.000199119	APOE/GAS6/COL3A1/COL1A1/COL1A2	5
GO:0009612	response to mechanical stimulus	5/30	200/17913	1.8741e-05	0.00100215	0.00063543	TNC/DCN/COL3A1/COL1A1/COL11A1	5
GO:0071560	cellular response to transforming growth factor beta stimulus	5/30	233/17913	3.89774e-05	0.00156947	0.000995149	FBN1/COL3A1/COL1A1/COL1A2/FMOD	5
GO:0071559	response to transforming growth factor beta	5/30	239/17913	4.40001e-05	0.00165571	0.00104983	FBN1/COL3A1/COL1A1/COL1A2/FMOD	5
GO:0007178	transmembrane receptor protein serine/threonine kinase signaling pathway	5/30	323/17913	0.000181819	0.00473662	0.00300333	FSTL1/FBN1/COL3A1/COL1A2/FMOD	5
GO:0007596	blood coagulation	5/30	331/17913	0.00020372	0.0047611	0.00301885	APOE/GAS6/COL3A1/COL1A1/COL1A2	5
GO:0030336	negative regulation of cell migration	5/30	332/17913	0.000206594	0.0047611	0.00301885	APOE/DCN/COL3A1/TIMP1/IGFBP5	5
GO:0007599	hemostasis	5/30	336/17913	0.000218398	0.0047611	0.00301885	APOE/GAS6/COL3A1/COL1A1/COL1A2	5
GO:0050817	coagulation	5/30	337/17913	0.000221428	0.0047611	0.00301885	APOE/GAS6/COL3A1/COL1A1/COL1A2	5
GO:2000146	negative regulation of cell motility	5/30	347/17913	0.00025353	0.00486012	0.00308164	APOE/DCN/COL3A1/TIMP1/IGFBP5	5
GO:0051271	negative regulation of cellular component movement	5/30	365/17913	0.000320132	0.00561717	0.00356165	APOE/DCN/COL3A1/TIMP1/IGFBP5	5
GO:0040013	negative regulation of locomotion	5/30	377/17913	0.000371415	0.0062893	0.00398783	APOE/DCN/COL3A1/TIMP1/IGFBP5	5
GO:0052547	regulation of peptidase activity	5/30	398/17913	0.0004759	0.00739466	0.0046887	TIMP3/COL6A3/GAS6/TIMP1/PCOLCE	5
GO:0043434	response to peptide hormone	5/30	404/17913	0.000509474	0.00739466	0.0046887	FBN1/SPARC/TIMP1/COL1A1/IGFBP5	5
GO:0043588	skin development	5/30	412/17913	0.000556991	0.00797046	0.00505379	COL3A1/COL5A2/COL1A1/COL1A2/IGFBP5	5
GO:1901652	response to peptide	5/30	491/17913	0.00122554	0.0150019	0.00951216	FBN1/SPARC/TIMP1/COL1A1/IGFBP5	5
GO:0050878	regulation of body fluid levels	5/30	499/17913	0.00131674	0.0157389	0.00997951	APOE/GAS6/COL3A1/COL1A1/COL1A2	5
GO:0070208	protein heterotrimerization	4/30	13/17913	4.52144e-09	9.18757e-07	5.82552e-07	COL6A2/COL6A1/COL1A1/COL1A2	4
GO:0044273	sulfur compound catabolic process	4/30	48/17913	1.18142e-06	0.000100027	6.34238e-05	BGN/DCN/LUM/FMOD	4
GO:0070206	protein trimerization	4/30	54/17913	1.90683e-06	0.000149026	9.44923e-05	COL6A2/COL6A1/COL1A1/COL1A2	4
GO:0006027	glycosaminoglycan catabolic process	4/30	61/17913	3.12103e-06	0.000226497	0.000143614	BGN/DCN/LUM/FMOD	4
GO:0006026	aminoglycan catabolic process	4/30	63/17913	3.55419e-06	0.000240737	0.000152643	BGN/DCN/LUM/FMOD	4
GO:0033273	response to vitamin	4/30	95/17913	1.83022e-05	0.00100215	0.00063543	TNC/SPARC/GAS6/COL1A1	4
GO:0006024	glycosaminoglycan biosynthetic process	4/30	107/17913	2.92575e-05	0.00134057	0.000850009	BGN/DCN/LUM/FMOD	4
GO:0006023	aminoglycan biosynthetic process	4/30	108/17913	3.03475e-05	0.00134057	0.000850009	BGN/DCN/LUM/FMOD	4
GO:1903510	mucopolysaccharide metabolic process	4/30	112/17913	3.50076e-05	0.00148199	0.000939679	BGN/DCN/LUM/FMOD	4
GO:0002576	platelet degranulation	4/30	128/17913	5.90234e-05	0.00199893	0.00126745	TIMP3/SPARC/GAS6/TIMP1	4
GO:0051291	protein heterooligomerization	4/30	128/17913	5.90234e-05	0.00199893	0.00126745	COL6A2/COL6A1/COL1A1/COL1A2	4
GO:0030203	glycosaminoglycan metabolic process	4/30	157/17913	0.00013031	0.00389397	0.00246903	BGN/DCN/LUM/FMOD	4
GO:0006022	aminoglycan metabolic process	4/30	161/17913	0.000143576	0.00416782	0.00264267	BGN/DCN/LUM/FMOD	4
GO:1901136	carbohydrate derivative catabolic process	4/30	176/17913	0.000202145	0.0047611	0.00301885	BGN/DCN/LUM/FMOD	4
GO:0051216	cartilage development	4/30	182/17913	0.000229809	0.0047611	0.00301885	LUM/TIMP1/COL1A1/COL11A1	4
GO:0007179	transforming growth factor beta receptor signaling pathway	4/30	184/17913	0.000239608	0.0047611	0.00301885	FBN1/COL3A1/COL1A2/FMOD	4
GO:0044272	sulfur compound biosynthetic process	4/30	190/17913	0.000270814	0.00509531	0.00323076	BGN/DCN/LUM/FMOD	4
GO:0034284	response to monosaccharide	4/30	200/17913	0.000329175	0.00566851	0.00359421	LGALS1/SPARC/GAS6/COL6A2	4
GO:0007601	visual perception	4/30	209/17913	0.000388975	0.00647866	0.00410789	TIMP3/LUM/COL1A1/COL11A1	4
GO:0010951	negative regulation of endopeptidase activity	4/30	210/17913	0.000396067	0.00649039	0.00411533	TIMP3/COL6A3/GAS6/TIMP1	4
GO:0050953	sensory perception of light stimulus	4/30	213/17913	0.000417902	0.00673949	0.00427328	TIMP3/LUM/COL1A1/COL11A1	4
GO:0007584	response to nutrient	4/30	215/17913	0.000432928	0.00687274	0.00435777	TNC/SPARC/GAS6/COL1A1	4
GO:0001649	osteoblast differentiation	4/30	222/17913	0.000488574	0.00739466	0.0046887	TNC/COL6A1/COL1A1/IGFBP5	4
GO:0010466	negative regulation of peptidase activity	4/30	223/17913	0.000496921	0.00739466	0.0046887	TIMP3/COL6A3/GAS6/TIMP1	4
GO:0009743	response to carbohydrate	4/30	224/17913	0.000505369	0.00739466	0.0046887	LGALS1/SPARC/GAS6/COL6A2	4
GO:0061448	connective tissue development	4/30	243/17913	0.000686088	0.00941981	0.00597277	LUM/TIMP1/COL1A1/COL11A1	4
GO:0010721	negative regulation of cell development	4/30	317/17913	0.00183408	0.0204992	0.0129978	APOE/FBN1/LGALS1/COL3A1	4
GO:0031589	cell-substrate adhesion	4/30	322/17913	0.00194184	0.0212141	0.0134511	LGALS1/GAS6/COL3A1/COL1A1	4
GO:0045861	negative regulation of proteolysis	4/30	324/17913	0.00198615	0.0214673	0.0136117	TIMP3/COL6A3/GAS6/TIMP1	4
GO:0006790	sulfur compound metabolic process	4/30	346/17913	0.00252097	0.0258718	0.0164044	BGN/DCN/LUM/FMOD	4
GO:0052548	regulation of endopeptidase activity	4/30	370/17913	0.00320976	0.0314141	0.0199186	TIMP3/COL6A3/GAS6/TIMP1	4
GO:0060537	muscle tissue development	4/30	392/17913	0.00394574	0.0366101	0.0232132	DCN/COL3A1/COL11A1/IGFBP5	4
GO:0050808	synapse organization	4/30	394/17913	0.00401787	0.0366101	0.0232132	TNC/APOE/SPARCL1/SPARC	4
GO:0001558	regulation of cell growth	4/30	396/17913	0.0040909	0.0367819	0.0233221	APOE/IGFBP4/IGFBP7/IGFBP5	4
GO:0007517	muscle organ development	4/30	403/17913	0.0043536	0.0384631	0.0243881	COL6A3/DCN/COL3A1/COL11A1	4
GO:0051346	negative regulation of hydrolase activity	4/30	420/17913	0.00503883	0.043756	0.0277442	TIMP3/COL6A3/GAS6/TIMP1	4
GO:0050673	epithelial cell proliferation	4/30	425/17913	0.00525345	0.0450989	0.0285957	APOE/IGFBP4/SPARC/IGFBP5	4
GO:0001667	ameboidal-type cell migration	4/30	446/17913	0.00622228	0.051397	0.0325891	APOE/SPARC/DCN/TIMP1	4
GO:0016049	cell growth	4/30	466/17913	0.00725006	0.0558035	0.0353831	APOE/IGFBP4/IGFBP7/IGFBP5	4
GO:0009636	response to toxic substance	4/30	499/17913	0.00918272	0.0676061	0.0428667	TNC/APOE/SPARC/COL1A1	4
GO:0051043	regulation of membrane protein ectodomain proteolysis	3/30	21/17913	5.52402e-06	0.000330142	0.000209331	TIMP3/APOE/TIMP1	3
GO:0071295	cellular response to vitamin	3/30	32/17913	2.03463e-05	0.00103359	0.000655364	TNC/GAS6/COL1A1	3
GO:0018149	peptide cross-linking	3/30	34/17913	2.44914e-05	0.00118492	0.000751314	BGN/DCN/COL3A1	3
GO:0006509	membrane protein ectodomain proteolysis	3/30	40/17913	4.01637e-05	0.00156947	0.000995149	TIMP3/APOE/TIMP1	3
GO:0035987	endodermal cell differentiation	3/30	45/17913	5.73595e-05	0.00199893	0.00126745	COL5A2/COL6A1/COL11A1	3
GO:0001706	endoderm formation	3/30	50/17913	7.87818e-05	0.00258201	0.00163716	COL5A2/COL6A1/COL11A1	3
GO:0033619	membrane protein proteolysis	3/30	56/17913	0.000110667	0.00340722	0.0021604	TIMP3/APOE/TIMP1	3
GO:0031670	cellular response to nutrient	3/30	71/17913	0.00022435	0.0047611	0.00301885	TNC/GAS6/COL1A1	3
GO:0007492	endoderm development	3/30	73/17913	0.000243586	0.0047611	0.00301885	COL5A2/COL6A1/COL11A1	3
GO:0006029	proteoglycan metabolic process	3/30	79/17913	0.000307617	0.00558105	0.00353875	BGN/DCN/COL11A1	3
GO:0051591	response to cAMP	3/30	93/17913	0.000496878	0.00739466	0.0046887	SPARC/COL1A1/IGFBP5	3
GO:0032526	response to retinoic acid	3/30	103/17913	0.000669574	0.009319	0.00590886	TNC/IGFBP7/COL1A1	3
GO:0001704	formation of primary germ layer	3/30	117/17913	0.000969454	0.0126278	0.00800682	COL5A2/COL6A1/COL11A1	3
GO:0042476	odontogenesis	3/30	126/17913	0.00120083	0.0148786	0.00943402	TNC/COL1A1/COL1A2	3
GO:0046683	response to organophosphorus	3/30	130/17913	0.00131391	0.0157389	0.00997951	SPARC/COL1A1/IGFBP5	3
GO:0045807	positive regulation of endocytosis	3/30	141/17913	0.00165884	0.0191521	0.0121437	APOE/MFGE8/GAS6	3
GO:0014074	response to purine-containing compound	3/30	145/17913	0.00179702	0.0204992	0.0129978	SPARC/COL1A1/IGFBP5	3
GO:0031214	biomineral tissue development	3/30	154/17913	0.00213374	0.0228198	0.0144692	GAS6/COL1A1/COL1A2	3
GO:0031960	response to corticosteroid	3/30	155/17913	0.00217341	0.0230019	0.0145847	SPARC/IGFBP7/COL1A1	3
GO:0007266	Rho protein signal transduction	3/30	159/17913	0.00233666	0.024225	0.0153602	APOE/COL3A1/COL1A2	3
GO:0030324	lung development	3/30	169/17913	0.00277758	0.0282203	0.0178935	TNC/SPARC/IGFBP5	3
GO:0048771	tissue remodeling	3/30	170/17913	0.0028243	0.0284108	0.0180143	BGN/TIMP1/IGFBP5	3
GO:0030323	respiratory tube development	3/30	173/17913	0.00296737	0.0295573	0.0187413	TNC/SPARC/IGFBP5	3
GO:0007369	gastrulation	3/30	178/17913	0.00321562	0.0314141	0.0199186	COL5A2/COL6A1/COL11A1	3
GO:0060348	bone development	3/30	189/17913	0.00380582	0.0361375	0.0229135	FBN1/SPARC/COL1A1	3
GO:0009749	response to glucose	3/30	190/17913	0.00386253	0.0363364	0.0230396	LGALS1/GAS6/COL6A2	3
GO:0007565	female pregnancy	3/30	193/17913	0.00403576	0.0366101	0.0232132	TIMP1/IGFBP7/IGFBP5	3
GO:0060541	respiratory system development	3/30	193/17913	0.00403576	0.0366101	0.0232132	TNC/SPARC/IGFBP5	3
GO:0009746	response to hexose	3/30	195/17913	0.00415385	0.0370203	0.0234733	LGALS1/GAS6/COL6A2	3
GO:0031669	cellular response to nutrient levels	3/30	220/17913	0.0058101	0.0487856	0.0309333	TNC/GAS6/COL1A1	3
GO:0044706	multi-multicellular organism process	3/30	225/17913	0.00618241	0.051397	0.0325891	TIMP1/IGFBP7/IGFBP5	3
GO:0042593	glucose homeostasis	3/30	227/17913	0.00633525	0.0519082	0.0329132	LGALS1/GAS6/IGFBP5	3
GO:0033500	carbohydrate homeostasis	3/30	228/17913	0.00641252	0.0521209	0.0330481	LGALS1/GAS6/IGFBP5	3
GO:0010594	regulation of endothelial cell migration	3/30	231/17913	0.00664771	0.0536038	0.0339883	APOE/SPARC/DCN	3
GO:0097305	response to alcohol	3/30	232/17913	0.00672725	0.053818	0.0341241	TNC/SPARC/IGFBP7	3
GO:0090596	sensory organ morphogenesis	3/30	250/17913	0.00825714	0.0623619	0.0395415	FBN1/COL5A2/COL11A1	3
GO:0031668	cellular response to extracellular stimulus	3/30	251/17913	0.00834766	0.0623619	0.0395415	TNC/GAS6/COL1A1	3
GO:0018209	peptidyl-serine modification	3/30	252/17913	0.00843876	0.0625824	0.0396813	BGN/DCN/GAS6	3
GO:0030100	regulation of endocytosis	3/30	262/17913	0.00938232	0.0685787	0.0434834	APOE/MFGE8/GAS6	3
GO:0060828	regulation of canonical Wnt signaling pathway	3/30	264/17913	0.00957816	0.0695101	0.0440739	APOE/IGFBP4/COL1A1	3
GO:0007162	negative regulation of cell adhesion	3/30	271/17913	0.0102825	0.0725488	0.0460007	TNC/LGALS1/COL1A1	3
GO:0050768	negative regulation of neurogenesis	3/30	271/17913	0.0102825	0.0725488	0.0460007	APOE/LGALS1/COL3A1	3
GO:0070372	regulation of ERK1 and ERK2 cascade	3/30	271/17913	0.0102825	0.0725488	0.0460007	TIMP3/APOE/GAS6	3
GO:0043542	endothelial cell migration	3/30	275/17913	0.0106983	0.0749612	0.0475303	APOE/SPARC/DCN	3
GO:0070371	ERK1 and ERK2 cascade	3/30	289/17913	0.0122301	0.0828383	0.0525249	TIMP3/APOE/GAS6	3
GO:0051961	negative regulation of nervous system development	3/30	290/17913	0.0123441	0.0830568	0.0526635	APOE/LGALS1/COL3A1	3
GO:0010632	regulation of epithelial cell migration	3/30	294/17913	0.0128063	0.0846166	0.0536524	APOE/SPARC/DCN	3
GO:0060070	canonical Wnt signaling pathway	3/30	311/17913	0.0148814	0.094425	0.0598716	APOE/IGFBP4/COL1A1	3
GO:0007568	aging	3/30	318/17913	0.0157883	0.094425	0.0598716	DCN/TIMP1/IGFBP5	3
GO:0071496	cellular response to external stimulus	3/30	320/17913	0.016053	0.094425	0.0598716	TNC/GAS6/COL1A1	3
GO:0001655	urogenital system development	3/30	324/17913	0.0165902	0.094425	0.0598716	TNC/FBN1/DCN	3
GO:0007265	Ras protein signal transduction	3/30	324/17913	0.0165902	0.094425	0.0598716	APOE/COL3A1/COL1A2	3
GO:0019058	viral life cycle	3/30	324/17913	0.0165902	0.094425	0.0598716	APOE/LGALS1/GAS6	3
GO:0046677	response to antibiotic	3/30	328/17913	0.0171374	0.094425	0.0598716	TNC/SPARC/COL1A1	3
GO:0030111	regulation of Wnt signaling pathway	3/30	341/17913	0.0189857	0.094425	0.0598716	APOE/IGFBP4/COL1A1	3
GO:0010631	epithelial cell migration	3/30	354/17913	0.0209415	0.094425	0.0598716	APOE/SPARC/DCN	3
GO:0042176	regulation of protein catabolic process	3/30	354/17913	0.0209415	0.094425	0.0598716	TIMP3/APOE/TIMP1	3
GO:0090132	epithelium migration	3/30	357/17913	0.0214081	0.094425	0.0598716	APOE/SPARC/DCN	3
GO:0090130	tissue migration	3/30	363/17913	0.0223586	0.0961894	0.0609904	APOE/SPARC/DCN	3
GO:0009100	glycoprotein metabolic process	3/30	369/17913	0.0233321	0.0961894	0.0609904	BGN/DCN/COL11A1	3
GO:0048545	response to steroid hormone	3/30	375/17913	0.0243287	0.0974365	0.0617811	SPARC/IGFBP7/COL1A1	3
GO:0043900	regulation of multi-organism process	3/30	408/17913	0.0302209	0.109181	0.0692279	APOE/LGALS1/TIMP1	3
GO:0062012	regulation of small molecule metabolic process	3/30	439/17913	0.036388	0.115532	0.0732548	APOE/IGFBP4/IGFBP5	3
GO:0007264	small GTPase mediated signal transduction	3/30	465/17913	0.0420276	0.120434	0.0763631	APOE/COL3A1/COL1A2	3
GO:0050900	leukocyte migration	3/30	467/17913	0.0424789	0.120434	0.0763631	GAS6/COL1A1/COL1A2	3
GO:0060627	regulation of vesicle-mediated transport	3/30	480/17913	0.0454728	0.120767	0.0765745	APOE/MFGE8/GAS6	3
GO:0002521	leukocyte differentiation	3/30	485/17913	0.046652	0.122477	0.0776581	FBN1/LGALS1/GAS6	3
GO:0016055	Wnt signaling pathway	3/30	498/17913	0.0497895	0.125213	0.0793933	APOE/IGFBP4/COL1A1	3
GO:0043410	positive regulation of MAPK cascade	3/30	499/17913	0.0500351	0.12528	0.0794355	APOE/IGFBP4/GAS6	3
GO:0198738	cell-cell signaling by wnt	3/30	500/17913	0.0502813	0.125518	0.0795866	APOE/IGFBP4/COL1A1	3
GO:0030208	dermatan sulfate biosynthetic process	2/30	12/17913	0.000177102	0.00473515	0.0030024	BGN/DCN	2
GO:0042340	keratan sulfate catabolic process	2/30	12/17913	0.000177102	0.00473515	0.0030024	LUM/FMOD	2
GO:0030205	dermatan sulfate metabolic process	2/30	13/17913	0.000209085	0.0047611	0.00301885	BGN/DCN	2
GO:0043568	positive regulation of insulin-like growth factor receptor signaling pathway	2/30	13/17913	0.000209085	0.0047611	0.00301885	IGFBP4/IGFBP5	2
GO:0030207	chondroitin sulfate catabolic process	2/30	14/17913	0.000243678	0.0047611	0.00301885	BGN/DCN	2
GO:1905049	negative regulation of metallopeptidase activity	2/30	14/17913	0.000243678	0.0047611	0.00301885	TIMP3/TIMP1	2
GO:0050651	dermatan sulfate proteoglycan biosynthetic process	2/30	15/17913	0.000280874	0.00518852	0.00328986	BGN/DCN	2
GO:0050655	dermatan sulfate proteoglycan metabolic process	2/30	16/17913	0.000320665	0.00561717	0.00356165	BGN/DCN	2
GO:0044342	type B pancreatic cell proliferation	2/30	22/17913	0.000613436	0.00865627	0.00548864	IGFBP4/IGFBP5	2
GO:0043567	regulation of insulin-like growth factor receptor signaling pathway	2/30	24/17913	0.000731413	0.0099082	0.00628245	IGFBP4/IGFBP5	2
GO:0030206	chondroitin sulfate biosynthetic process	2/30	26/17913	0.000859474	0.0113406	0.00719068	BGN/DCN	2
GO:1905048	regulation of metallopeptidase activity	2/30	26/17913	0.000859474	0.0113406	0.00719068	TIMP3/TIMP1	2
GO:0018146	keratan sulfate biosynthetic process	2/30	28/17913	0.000997557	0.012669	0.00803296	LUM/FMOD	2
GO:0085029	extracellular matrix assembly	2/30	28/17913	0.000997557	0.012669	0.00803296	GAS6/COL1A2	2
GO:0050650	chondroitin sulfate proteoglycan biosynthetic process	2/30	29/17913	0.00107034	0.0134254	0.00851261	BGN/DCN	2
GO:0042339	keratan sulfate metabolic process	2/30	33/17913	0.00138618	0.0163763	0.0103837	LUM/FMOD	2
GO:0048009	insulin-like growth factor receptor signaling pathway	2/30	36/17913	0.00164882	0.0191521	0.0121437	IGFBP4/IGFBP5	2
GO:0043277	apoptotic cell clearance	2/30	38/17913	0.00183605	0.0204992	0.0129978	MFGE8/GAS6	2
GO:0030204	chondroitin sulfate metabolic process	2/30	39/17913	0.00193329	0.0212141	0.0134511	BGN/DCN	2
GO:0050654	chondroitin sulfate proteoglycan metabolic process	2/30	42/17913	0.00223938	0.0234558	0.0148725	BGN/DCN	2
GO:0007566	embryo implantation	2/30	52/17913	0.00341317	0.0330264	0.0209409	TIMP1/IGFBP7	2
GO:0030166	proteoglycan biosynthetic process	2/30	53/17913	0.00354333	0.0339625	0.0215345	BGN/DCN	2
GO:0050766	positive regulation of phagocytosis	2/30	60/17913	0.00451837	0.0395747	0.0250929	MFGE8/GAS6	2
GO:0071300	cellular response to retinoic acid	2/30	65/17913	0.00528226	0.0450989	0.0285957	TNC/COL1A1	2
GO:0010812	negative regulation of cell-substrate adhesion	2/30	67/17913	0.00560331	0.0474413	0.0300809	LGALS1/COL1A1	2
GO:0001937	negative regulation of endothelial cell proliferation	2/30	75/17913	0.00697459	0.0549316	0.0348302	APOE/SPARC	2
GO:0048678	response to axon injury	2/30	75/17913	0.00697459	0.0549316	0.0348302	TNC/LGALS1	2
GO:0048844	artery morphogenesis	2/30	76/17913	0.00715567	0.0554974	0.035189	APOE/COL3A1	2
GO:0060415	muscle tissue morphogenesis	2/30	76/17913	0.00715567	0.0554974	0.035189	COL3A1/COL11A1	2
GO:0034109	homotypic cell-cell adhesion	2/30	77/17913	0.00733888	0.0560625	0.0355473	LGALS1/GAS6	2
GO:0048644	muscle organ morphogenesis	2/30	82/17913	0.00828659	0.0623619	0.0395415	COL3A1/COL11A1	2
GO:0050764	regulation of phagocytosis	2/30	90/17913	0.00991093	0.0714149	0.0452817	MFGE8/GAS6	2
GO:0007229	integrin-mediated signaling pathway	2/30	94/17913	0.010772	0.0749612	0.0475303	COL3A1/TIMP1	2
GO:0050810	regulation of steroid biosynthetic process	2/30	95/17913	0.0109923	0.0759738	0.0481724	APOE/IGFBP7	2
GO:0010596	negative regulation of endothelial cell migration	2/30	99/17913	0.0118933	0.0816457	0.0517687	APOE/DCN	2
GO:0060840	artery development	2/30	100/17913	0.0121235	0.0826673	0.0524165	APOE/COL3A1	2
GO:0032963	collagen metabolic process	2/30	102/17913	0.0125897	0.0841522	0.053358	COL1A1/COL1A2	2
GO:0048524	positive regulation of viral process	2/30	103/17913	0.0128257	0.0846166	0.0536524	APOE/LGALS1	2
GO:0010906	regulation of glucose metabolic process	2/30	113/17913	0.0152917	0.094425	0.0598716	IGFBP4/IGFBP5	2
GO:0010633	negative regulation of epithelial cell migration	2/30	116/17913	0.0160683	0.094425	0.0598716	APOE/DCN	2
GO:0022612	gland morphogenesis	2/30	116/17913	0.0160683	0.094425	0.0598716	TNC/IGFBP5	2
GO:0048706	embryonic skeletal system development	2/30	117/17913	0.0163309	0.094425	0.0598716	COL1A1/COL11A1	2
GO:0046718	viral entry into host cell	2/30	121/17913	0.0173997	0.094425	0.0598716	LGALS1/GAS6	2
GO:0019218	regulation of steroid metabolic process	2/30	124/17913	0.0182204	0.094425	0.0598716	APOE/IGFBP7	2
GO:0035023	regulation of Rho protein signal transduction	2/30	124/17913	0.0182204	0.094425	0.0598716	APOE/COL3A1	2
GO:0042177	negative regulation of protein catabolic process	2/30	124/17913	0.0182204	0.094425	0.0598716	TIMP3/TIMP1	2
GO:0045471	response to ethanol	2/30	127/17913	0.0190574	0.094425	0.0598716	TNC/SPARC	2
GO:0071333	cellular response to glucose stimulus	2/30	128/17913	0.0193399	0.094425	0.0598716	LGALS1/GAS6	2
GO:0071331	cellular response to hexose stimulus	2/30	130/17913	0.0199103	0.094425	0.0598716	LGALS1/GAS6	2
GO:0071326	cellular response to monosaccharide stimulus	2/30	131/17913	0.0201982	0.094425	0.0598716	LGALS1/GAS6	2
GO:0030260	entry into host cell	2/30	134/17913	0.0210723	0.094425	0.0598716	LGALS1/GAS6	2
GO:0030509	BMP signaling pathway	2/30	134/17913	0.0210723	0.094425	0.0598716	FSTL1/FBN1	2
GO:0044409	entry into host	2/30	134/17913	0.0210723	0.094425	0.0598716	LGALS1/GAS6	2
GO:0051806	entry into cell of other organism involved in symbiotic interaction	2/30	134/17913	0.0210723	0.094425	0.0598716	LGALS1/GAS6	2
GO:0051828	entry into other organism involved in symbiotic interaction	2/30	134/17913	0.0210723	0.094425	0.0598716	LGALS1/GAS6	2
GO:0010977	negative regulation of neuron projection development	2/30	135/17913	0.0213672	0.094425	0.0598716	APOE/LGALS1	2
GO:0050709	negative regulation of protein secretion	2/30	137/17913	0.0219621	0.0957659	0.0607218	APOE/GAS6	2
GO:0010675	regulation of cellular carbohydrate metabolic process	2/30	138/17913	0.0222621	0.0961894	0.0609904	IGFBP4/IGFBP5	2
GO:0007605	sensory perception of sound	2/30	139/17913	0.0225638	0.0961894	0.0609904	COL1A1/COL11A1	2
GO:0051384	response to glucocorticoid	2/30	139/17913	0.0225638	0.0961894	0.0609904	SPARC/IGFBP7	2
GO:0071322	cellular response to carbohydrate stimulus	2/30	139/17913	0.0225638	0.0961894	0.0609904	LGALS1/GAS6	2
GO:0001678	cellular glucose homeostasis	2/30	142/17913	0.0234793	0.0961894	0.0609904	LGALS1/GAS6	2
GO:0002792	negative regulation of peptide secretion	2/30	142/17913	0.0234793	0.0961894	0.0609904	APOE/GAS6	2
GO:0048592	eye morphogenesis	2/30	145/17913	0.02441	0.0974365	0.0617811	FBN1/COL5A2	2
GO:0071774	response to fibroblast growth factor	2/30	145/17913	0.02441	0.0974365	0.0617811	TNC/COL1A1	2
GO:0071772	response to BMP	2/30	147/17913	0.0250388	0.097469	0.0618017	FSTL1/FBN1	2
GO:0071773	cellular response to BMP stimulus	2/30	147/17913	0.0250388	0.097469	0.0618017	FSTL1/FBN1	2
GO:0001764	neuron migration	2/30	152/17913	0.0266398	0.0995073	0.0630941	GAS6/COL3A1	2
GO:0090288	negative regulation of cellular response to growth factor stimulus	2/30	156/17913	0.0279499	0.103086	0.0653631	FBN1/DCN	2
GO:0050954	sensory perception of mechanical stimulus	2/30	159/17913	0.0289493	0.1058	0.0670844	COL1A1/COL11A1	2
GO:0050680	negative regulation of epithelial cell proliferation	2/30	163/17913	0.0303042	0.109181	0.0692279	APOE/SPARC	2
GO:0031345	negative regulation of cell projection organization	2/30	166/17913	0.0313367	0.110634	0.0701493	APOE/LGALS1	2
GO:0008217	regulation of blood pressure	2/30	169/17913	0.0323832	0.112458	0.071306	GAS6/COL1A2	2
GO:0090090	negative regulation of canonical Wnt signaling pathway	2/30	169/17913	0.0323832	0.112458	0.071306	APOE/IGFBP4	2
GO:0001936	regulation of endothelial cell proliferation	2/30	170/17913	0.0327351	0.112458	0.071306	APOE/SPARC	2
GO:0051897	positive regulation of protein kinase B signaling	2/30	173/17913	0.0337999	0.112692	0.071454	GAS6/IGFBP5	2
GO:0042594	response to starvation	2/30	174/17913	0.0341578	0.112692	0.071454	FSTL1/GAS6	2
GO:0016525	negative regulation of angiogenesis	2/30	177/17913	0.0352407	0.114391	0.0725316	SPARC/DCN	2
GO:0043409	negative regulation of MAPK cascade	2/30	179/17913	0.03597	0.115532	0.0732548	TIMP3/APOE	2
GO:2000181	negative regulation of blood vessel morphogenesis	2/30	179/17913	0.03597	0.115532	0.0732548	SPARC/DCN	2
GO:0043902	positive regulation of multi-organism process	2/30	180/17913	0.0363369	0.115532	0.0732548	APOE/LGALS1	2
GO:0001935	endothelial cell proliferation	2/30	185/17913	0.0381931	0.118305	0.0750134	APOE/SPARC	2
GO:0048839	inner ear development	2/30	185/17913	0.0381931	0.118305	0.0750134	SPARC/COL11A1	2
GO:0070374	positive regulation of ERK1 and ERK2 cascade	2/30	186/17913	0.0385687	0.119106	0.0755209	APOE/GAS6	2
GO:0051224	negative regulation of protein transport	2/30	189/17913	0.0397041	0.120057	0.0761243	APOE/GAS6	2
GO:0006694	steroid biosynthetic process	2/30	190/17913	0.0400853	0.120434	0.0763631	APOE/IGFBP7	2
GO:1901343	negative regulation of vasculature development	2/30	191/17913	0.0404681	0.120434	0.0763631	SPARC/DCN	2
GO:1901654	response to ketone	2/30	191/17913	0.0404681	0.120434	0.0763631	TNC/IGFBP7	2
GO:1904950	negative regulation of establishment of protein localization	2/30	193/17913	0.0412377	0.120434	0.0763631	APOE/GAS6	2
GO:0031099	regeneration	2/30	194/17913	0.0416246	0.120434	0.0763631	TNC/GAS6	2
GO:0046890	regulation of lipid biosynthetic process	2/30	195/17913	0.0420129	0.120434	0.0763631	APOE/IGFBP7	2
GO:0006109	regulation of carbohydrate metabolic process	2/30	198/17913	0.0431861	0.120767	0.0765745	IGFBP4/IGFBP5	2
GO:0030178	negative regulation of Wnt signaling pathway	2/30	198/17913	0.0431861	0.120767	0.0765745	APOE/IGFBP4	2
GO:0010810	regulation of cell-substrate adhesion	2/30	201/17913	0.0443716	0.120767	0.0765745	LGALS1/COL1A1	2
GO:0045665	negative regulation of neuron differentiation	2/30	201/17913	0.0443716	0.120767	0.0765745	APOE/LGALS1	2
GO:1903531	negative regulation of secretion by cell	2/30	202/17913	0.0447694	0.120767	0.0765745	APOE/GAS6	2
GO:0006006	glucose metabolic process	2/30	204/17913	0.0455692	0.120767	0.0765745	IGFBP4/IGFBP5	2
GO:0048705	skeletal system morphogenesis	2/30	204/17913	0.0455692	0.120767	0.0765745	COL1A1/COL11A1	2
GO:0050792	regulation of viral process	2/30	204/17913	0.0455692	0.120767	0.0765745	APOE/LGALS1	2
GO:0051701	interaction with host	2/30	211/17913	0.0484103	0.124044	0.078652	LGALS1/GAS6	2
GO:0043583	ear development	2/30	212/17913	0.0488215	0.124044	0.078652	SPARC/COL11A1	2
GO:0060560	developmental growth involved in morphogenesis	2/30	214/17913	0.0496476	0.125166	0.0793635	TNC/APOE	2
GO:0046578	regulation of Ras protein signal transduction	2/30	215/17913	0.0500625	0.12528	0.0794355	APOE/COL3A1	2
GO:0034249	negative regulation of cellular amide metabolic process	2/30	217/17913	0.0508964	0.126432	0.0801662	APOE/IGFBP5	2
GO:0050807	regulation of synapse organization	2/30	218/17913	0.0513152	0.127161	0.0806287	APOE/SPARC	2
GO:0050803	regulation of synapse structure or activity	2/30	222/17913	0.053003	0.130909	0.083005	APOE/SPARC	2
GO:0051048	negative regulation of secretion	2/30	226/17913	0.0547107	0.132664	0.0841175	APOE/GAS6	2
GO:0000302	response to reactive oxygen species	2/30	230/17913	0.056438	0.135879	0.0861563	APOE/COL1A1	2
GO:0043903	regulation of symbiosis, encompassing mutualism through parasitism	2/30	232/17913	0.0573089	0.13636	0.0864614	APOE/LGALS1	2
GO:0019318	hexose metabolic process	2/30	239/17913	0.0603944	0.140414	0.0890314	IGFBP4/IGFBP5	2
GO:0051896	regulation of protein kinase B signaling	2/30	241/17913	0.0612865	0.141348	0.0896237	GAS6/IGFBP5	2
GO:0031330	negative regulation of cellular catabolic process	2/30	244/17913	0.0626333	0.143001	0.0906719	TIMP3/TIMP1	2
GO:0044262	cellular carbohydrate metabolic process	2/30	256/17913	0.0681212	0.150787	0.0956087	IGFBP4/IGFBP5	2
GO:0051251	positive regulation of lymphocyte activation	2/30	258/17913	0.0690512	0.152439	0.0966563	LGALS1/GAS6	2
GO:0071356	cellular response to tumor necrosis factor	2/30	266/17913	0.0728135	0.157401	0.0998027	GAS6/COL1A1	2
GO:1902105	regulation of leukocyte differentiation	2/30	267/17913	0.0732885	0.157918	0.10013	FBN1/GAS6	2
GO:0043491	protein kinase B signaling	2/30	268/17913	0.0737646	0.157918	0.10013	GAS6/IGFBP5	2
GO:0001822	kidney development	2/30	276/17913	0.0776093	0.160266	0.101619	FBN1/DCN	2
GO:0048562	embryonic organ morphogenesis	2/30	276/17913	0.0776093	0.160266	0.101619	FBN1/COL11A1	2
GO:0090287	regulation of cellular response to growth factor stimulus	2/30	276/17913	0.0776093	0.160266	0.101619	FBN1/DCN	2
GO:0005996	monosaccharide metabolic process	2/30	277/17913	0.0780944	0.160751	0.101926	IGFBP4/IGFBP5	2
GO:0034612	response to tumor necrosis factor	2/30	284/17913	0.0815173	0.163121	0.10343	GAS6/COL1A1	2
GO:0051235	maintenance of location	2/30	286/17913	0.082504	0.163625	0.103749	APOE/FBN1	2
GO:0009895	negative regulation of catabolic process	2/30	288/17913	0.0834944	0.163625	0.103749	TIMP3/TIMP1	2
GO:0072001	renal system development	2/30	291/17913	0.084987	0.165681	0.105052	FBN1/DCN	2
GO:0032496	response to lipopolysaccharide	2/30	295/17913	0.0869901	0.168027	0.10654	SPARC/DCN	2
GO:0006898	receptor-mediated endocytosis	2/30	301/17913	0.0900219	0.170639	0.108196	APOE/SPARC	2
GO:0009101	glycoprotein biosynthetic process	2/30	302/17913	0.0905303	0.171062	0.108464	BGN/DCN	2
GO:0002696	positive regulation of leukocyte activation	2/30	305/17913	0.0920608	0.172254	0.10922	LGALS1/GAS6	2
GO:0006909	phagocytosis	2/30	308/17913	0.0935991	0.173534	0.110032	MFGE8/GAS6	2
GO:0002237	response to molecule of bacterial origin	2/30	309/17913	0.0941135	0.173894	0.11026	SPARC/DCN	2
GO:0051056	regulation of small GTPase mediated signal transduction	2/30	316/17913	0.0977384	0.177961	0.112839	APOE/COL3A1	2
GO:0072330	monocarboxylic acid biosynthetic process	2/30	318/17913	0.0987815	0.179369	0.113731	BGN/DCN	2
GO:0050867	positive regulation of cell activation	2/30	319/17913	0.0993043	0.179845	0.114034	LGALS1/GAS6	2
GO:0008202	steroid metabolic process	2/30	321/17913	0.100352	0.180505	0.114452	APOE/IGFBP7	2
GO:0030098	lymphocyte differentiation	2/30	325/17913	0.102458	0.182307	0.115594	LGALS1/GAS6	2
GO:0045862	positive regulation of proteolysis	2/30	333/17913	0.106706	0.188546	0.11955	APOE/PCOLCE	2
GO:0031331	positive regulation of cellular catabolic process	2/30	341/17913	0.111003	0.193779	0.122869	APOE/DCN	2
GO:0001654	eye development	2/30	342/17913	0.111544	0.193896	0.122943	FBN1/COL5A2	2
GO:0150063	visual system development	2/30	346/17913	0.113713	0.194817	0.123526	FBN1/COL5A2	2
GO:0048880	sensory system development	2/30	351/17913	0.11644	0.197253	0.125071	FBN1/COL5A2	2
GO:0050678	regulation of epithelial cell proliferation	2/30	369/17913	0.126396	0.206152	0.130714	APOE/SPARC	2
GO:0014706	striated muscle tissue development	2/30	376/17913	0.130323	0.208846	0.132422	DCN/COL11A1	2
GO:0045765	regulation of angiogenesis	2/30	383/17913	0.13428	0.21192	0.134371	SPARC/DCN	2
GO:0009896	positive regulation of catabolic process	2/30	392/17913	0.139409	0.214705	0.136137	APOE/DCN	2
GO:0051249	regulation of lymphocyte activation	2/30	401/17913	0.144582	0.216814	0.137474	LGALS1/GAS6	2
GO:0019216	regulation of lipid metabolic process	2/30	402/17913	0.14516	0.217051	0.137625	APOE/IGFBP7	2
GO:0048568	embryonic organ development	2/30	413/17913	0.151544	0.222642	0.14117	FBN1/COL11A1	2
GO:0001933	negative regulation of protein phosphorylation	2/30	416/17913	0.153296	0.223777	0.141889	TIMP3/APOE	2
GO:0048732	gland development	2/30	422/17913	0.156812	0.227276	0.144108	TNC/IGFBP5	2
GO:1901342	regulation of vasculature development	2/30	425/17913	0.158576	0.228729	0.145029	SPARC/DCN	2
GO:0046394	carboxylic acid biosynthetic process	2/30	426/17913	0.159165	0.228729	0.145029	BGN/DCN	2
GO:0048608	reproductive structure development	2/30	426/17913	0.159165	0.228729	0.145029	TNC/DCN	2
GO:0016053	organic acid biosynthetic process	2/30	427/17913	0.159754	0.229252	0.145361	BGN/DCN	2
GO:0061458	reproductive system development	2/30	429/17913	0.160934	0.230251	0.145994	TNC/DCN	2
GO:0022604	regulation of cell morphogenesis	2/30	430/17913	0.161525	0.230251	0.145994	APOE/SPARC	2
GO:0061564	axon development	2/30	438/17913	0.166265	0.233969	0.148351	TNC/APOE	2
GO:0006979	response to oxidative stress	2/30	442/17913	0.168645	0.236336	0.149852	APOE/COL1A1	2
GO:0002683	negative regulation of immune system process	2/30	451/17913	0.174023	0.239576	0.151907	FBN1/COL3A1	2
GO:0034248	regulation of cellular amide metabolic process	2/30	452/17913	0.174622	0.239752	0.152018	APOE/IGFBP5	2
GO:0042326	negative regulation of phosphorylation	2/30	455/17913	0.176423	0.240922	0.15276	TIMP3/APOE	2
GO:0050708	regulation of protein secretion	2/30	456/17913	0.177024	0.241357	0.153036	APOE/GAS6	2
GO:0010975	regulation of neuron projection development	2/30	458/17913	0.178226	0.241626	0.153207	APOE/LGALS1	2
GO:0006875	cellular metal ion homeostasis	2/30	467/17913	0.183656	0.246328	0.156188	APOE/CP	2
GO:1903706	regulation of hemopoiesis	2/30	468/17913	0.184261	0.246328	0.156188	FBN1/GAS6	2
GO:0002791	regulation of peptide secretion	2/30	483/17913	0.193372	0.254937	0.161647	APOE/GAS6	2
GO:0002694	regulation of leukocyte activation	2/30	492/17913	0.19887	0.259059	0.16426	LGALS1/GAS6	2
GO:0019062	virion attachment to host cell	1/30	10/17913	0.0166261	0.094425	0.0598716	GAS6	1
GO:0032488	Cdc42 protein signal transduction	1/30	10/17913	0.0166261	0.094425	0.0598716	APOE	1
GO:0032823	regulation of natural killer cell differentiation	1/30	10/17913	0.0166261	0.094425	0.0598716	GAS6	1
GO:0034350	regulation of glial cell apoptotic process	1/30	10/17913	0.0166261	0.094425	0.0598716	GAS6	1
GO:0034378	chylomicron assembly	1/30	10/17913	0.0166261	0.094425	0.0598716	APOE	1
GO:0034447	very-low-density lipoprotein particle clearance	1/30	10/17913	0.0166261	0.094425	0.0598716	APOE	1
GO:0044803	multi-organism membrane organization	1/30	10/17913	0.0166261	0.094425	0.0598716	GAS6	1
GO:0051901	positive regulation of mitochondrial depolarization	1/30	10/17913	0.0166261	0.094425	0.0598716	DCN	1
GO:0060346	bone trabecula formation	1/30	10/17913	0.0166261	0.094425	0.0598716	COL1A1	1
GO:0097090	presynaptic membrane organization	1/30	10/17913	0.0166261	0.094425	0.0598716	APOE	1
GO:1904684	negative regulation of metalloendopeptidase activity	1/30	10/17913	0.0166261	0.094425	0.0598716	TIMP3	1
GO:0003093	regulation of glomerular filtration	1/30	11/17913	0.0182739	0.094425	0.0598716	GAS6	1
GO:0009629	response to gravity	1/30	11/17913	0.0182739	0.094425	0.0598716	SPARC	1
GO:0032908	regulation of transforming growth factor beta1 production	1/30	11/17913	0.0182739	0.094425	0.0598716	LUM	1
GO:0033700	phospholipid efflux	1/30	11/17913	0.0182739	0.094425	0.0598716	APOE	1
GO:0034372	very-low-density lipoprotein particle remodeling	1/30	11/17913	0.0182739	0.094425	0.0598716	APOE	1
GO:0035457	cellular response to interferon-alpha	1/30	11/17913	0.0182739	0.094425	0.0598716	GAS6	1
GO:0050910	detection of mechanical stimulus involved in sensory perception of sound	1/30	11/17913	0.0182739	0.094425	0.0598716	COL11A1	1
GO:0060856	establishment of blood-brain barrier	1/30	11/17913	0.0182739	0.094425	0.0598716	MXRA8	1
GO:0090209	negative regulation of triglyceride metabolic process	1/30	11/17913	0.0182739	0.094425	0.0598716	APOE	1
GO:0097048	dendritic cell apoptotic process	1/30	11/17913	0.0182739	0.094425	0.0598716	GAS6	1
GO:1900115	extracellular regulation of signal transduction	1/30	11/17913	0.0182739	0.094425	0.0598716	FBN1	1
GO:1900116	extracellular negative regulation of signal transduction	1/30	11/17913	0.0182739	0.094425	0.0598716	FBN1	1
GO:2000668	regulation of dendritic cell apoptotic process	1/30	11/17913	0.0182739	0.094425	0.0598716	GAS6	1
GO:2001204	regulation of osteoclast development	1/30	11/17913	0.0182739	0.094425	0.0598716	FBN1	1
GO:2001223	negative regulation of neuron migration	1/30	11/17913	0.0182739	0.094425	0.0598716	COL3A1	1
GO:0009886	post-embryonic animal morphogenesis	1/30	12/17913	0.0199191	0.094425	0.0598716	FBN1	1
GO:0010872	regulation of cholesterol esterification	1/30	12/17913	0.0199191	0.094425	0.0598716	APOE	1
GO:0032905	transforming growth factor beta1 production	1/30	12/17913	0.0199191	0.094425	0.0598716	LUM	1
GO:0033197	response to vitamin E	1/30	12/17913	0.0199191	0.094425	0.0598716	COL1A1	1
GO:0034380	high-density lipoprotein particle assembly	1/30	12/17913	0.0199191	0.094425	0.0598716	APOE	1
GO:0035641	locomotory exploration behavior	1/30	12/17913	0.0199191	0.094425	0.0598716	APOE	1
GO:0044650	adhesion of symbiont to host cell	1/30	12/17913	0.0199191	0.094425	0.0598716	GAS6	1
GO:0061450	trophoblast cell migration	1/30	12/17913	0.0199191	0.094425	0.0598716	TIMP1	1
GO:0072578	neurotransmitter-gated ion channel clustering	1/30	12/17913	0.0199191	0.094425	0.0598716	APOE	1
GO:1900165	negative regulation of interleukin-6 secretion	1/30	12/17913	0.0199191	0.094425	0.0598716	GAS6	1
GO:1901163	regulation of trophoblast cell migration	1/30	12/17913	0.0199191	0.094425	0.0598716	TIMP1	1
GO:1902430	negative regulation of amyloid-beta formation	1/30	12/17913	0.0199191	0.094425	0.0598716	APOE	1
GO:1902950	regulation of dendritic spine maintenance	1/30	12/17913	0.0199191	0.094425	0.0598716	APOE	1
GO:1904181	positive regulation of membrane depolarization	1/30	12/17913	0.0199191	0.094425	0.0598716	DCN	1
GO:0014745	negative regulation of muscle adaptation	1/30	13/17913	0.0215616	0.094425	0.0598716	IGFBP5	1
GO:0032802	low-density lipoprotein particle receptor catabolic process	1/30	13/17913	0.0215616	0.094425	0.0598716	APOE	1
GO:0034370	triglyceride-rich lipoprotein particle remodeling	1/30	13/17913	0.0215616	0.094425	0.0598716	APOE	1
GO:0034374	low-density lipoprotein particle remodeling	1/30	13/17913	0.0215616	0.094425	0.0598716	APOE	1
GO:0044794	positive regulation by host of viral process	1/30	13/17913	0.0215616	0.094425	0.0598716	APOE	1
GO:0061430	bone trabecula morphogenesis	1/30	13/17913	0.0215616	0.094425	0.0598716	COL1A1	1
GO:0090594	inflammatory response to wounding	1/30	13/17913	0.0215616	0.094425	0.0598716	TIMP1	1
GO:1900272	negative regulation of long-term synaptic potentiation	1/30	13/17913	0.0215616	0.094425	0.0598716	APOE	1
GO:2001044	regulation of integrin-mediated signaling pathway	1/30	13/17913	0.0215616	0.094425	0.0598716	TIMP1	1
GO:0006825	copper ion transport	1/30	14/17913	0.0232015	0.0961894	0.0609904	CP	1
GO:0006910	phagocytosis, recognition	1/30	14/17913	0.0232015	0.0961894	0.0609904	MFGE8	1
GO:0048569	post-embryonic animal organ development	1/30	14/17913	0.0232015	0.0961894	0.0609904	FBN1	1
GO:0090141	positive regulation of mitochondrial fission	1/30	14/17913	0.0232015	0.0961894	0.0609904	DCN	1
GO:1900747	negative regulation of vascular endothelial growth factor signaling pathway	1/30	14/17913	0.0232015	0.0961894	0.0609904	DCN	1
GO:1901626	regulation of postsynaptic membrane organization	1/30	14/17913	0.0232015	0.0961894	0.0609904	APOE	1
GO:1902043	positive regulation of extrinsic apoptotic signaling pathway via death domain receptors	1/30	14/17913	0.0232015	0.0961894	0.0609904	TIMP3	1
GO:0014733	regulation of skeletal muscle adaptation	1/30	15/17913	0.0248386	0.0974365	0.0617811	IGFBP5	1
GO:0034349	glial cell apoptotic process	1/30	15/17913	0.0248386	0.0974365	0.0617811	GAS6	1
GO:0044406	adhesion of symbiont to host	1/30	15/17913	0.0248386	0.0974365	0.0617811	GAS6	1
GO:0051044	positive regulation of membrane protein ectodomain proteolysis	1/30	15/17913	0.0248386	0.0974365	0.0617811	APOE	1
GO:0055089	fatty acid homeostasis	1/30	15/17913	0.0248386	0.0974365	0.0617811	APOE	1
GO:1902548	negative regulation of cellular response to vascular endothelial growth factor stimulus	1/30	15/17913	0.0248386	0.0974365	0.0617811	DCN	1
GO:1902992	negative regulation of amyloid precursor protein catabolic process	1/30	15/17913	0.0248386	0.0974365	0.0617811	APOE	1
GO:1990000	amyloid fibril formation	1/30	15/17913	0.0248386	0.0974365	0.0617811	APOE	1
GO:0001977	renal system process involved in regulation of blood volume	1/30	16/17913	0.0264732	0.0992499	0.062931	GAS6	1
GO:0010875	positive regulation of cholesterol efflux	1/30	16/17913	0.0264732	0.0992499	0.062931	APOE	1
GO:0010934	macrophage cytokine production	1/30	16/17913	0.0264732	0.0992499	0.062931	GAS6	1
GO:0034433	steroid esterification	1/30	16/17913	0.0264732	0.0992499	0.062931	APOE	1
GO:0034434	sterol esterification	1/30	16/17913	0.0264732	0.0992499	0.062931	APOE	1
GO:0034435	cholesterol esterification	1/30	16/17913	0.0264732	0.0992499	0.062931	APOE	1
GO:0035025	positive regulation of Rho protein signal transduction	1/30	16/17913	0.0264732	0.0992499	0.062931	COL3A1	1
GO:0036035	osteoclast development	1/30	16/17913	0.0264732	0.0992499	0.062931	FBN1	1
GO:0070293	renal absorption	1/30	16/17913	0.0264732	0.0992499	0.062931	GAS6	1
GO:1900221	regulation of amyloid-beta clearance	1/30	16/17913	0.0264732	0.0992499	0.062931	APOE	1
GO:0034375	high-density lipoprotein particle remodeling	1/30	17/17913	0.028105	0.103086	0.0653631	APOE	1
GO:0034384	high-density lipoprotein particle clearance	1/30	17/17913	0.028105	0.103086	0.0653631	APOE	1
GO:0050711	negative regulation of interleukin-1 secretion	1/30	17/17913	0.028105	0.103086	0.0653631	GAS6	1
GO:1902931	negative regulation of alcohol biosynthetic process	1/30	17/17913	0.028105	0.103086	0.0653631	APOE	1
GO:0001779	natural killer cell differentiation	1/30	18/17913	0.0297343	0.107893	0.0684112	GAS6	1
GO:0007271	synaptic transmission, cholinergic	1/30	18/17913	0.0297343	0.107893	0.0684112	APOE	1
GO:0001502	cartilage condensation	1/30	19/17913	0.0313609	0.110634	0.0701493	COL11A1	1
GO:0002313	mature B cell differentiation involved in immune response	1/30	19/17913	0.0313609	0.110634	0.0701493	LGALS1	1
GO:0010544	negative regulation of platelet activation	1/30	19/17913	0.0313609	0.110634	0.0701493	APOE	1
GO:0043691	reverse cholesterol transport	1/30	19/17913	0.0313609	0.110634	0.0701493	APOE	1
GO:1904683	regulation of metalloendopeptidase activity	1/30	19/17913	0.0313609	0.110634	0.0701493	TIMP3	1
GO:0032816	positive regulation of natural killer cell activation	1/30	20/17913	0.0329848	0.112458	0.071306	GAS6	1
GO:0034505	tooth mineralization	1/30	20/17913	0.0329848	0.112458	0.071306	COL1A1	1
GO:0048745	smooth muscle tissue development	1/30	20/17913	0.0329848	0.112458	0.071306	COL3A1	1
GO:0060602	branch elongation of an epithelium	1/30	20/17913	0.0329848	0.112458	0.071306	TNC	1
GO:0071636	positive regulation of transforming growth factor beta production	1/30	20/17913	0.0329848	0.112458	0.071306	LUM	1
GO:0097062	dendritic spine maintenance	1/30	20/17913	0.0329848	0.112458	0.071306	APOE	1
GO:0098743	cell aggregation	1/30	20/17913	0.0329848	0.112458	0.071306	COL11A1	1
GO:0003094	glomerular filtration	1/30	21/17913	0.0346062	0.112692	0.071454	GAS6	1
GO:0032373	positive regulation of sterol transport	1/30	21/17913	0.0346062	0.112692	0.071454	APOE	1
GO:0032376	positive regulation of cholesterol transport	1/30	21/17913	0.0346062	0.112692	0.071454	APOE	1
GO:0032462	regulation of protein homooligomerization	1/30	21/17913	0.0346062	0.112692	0.071454	APOE	1
GO:0035455	response to interferon-alpha	1/30	21/17913	0.0346062	0.112692	0.071454	GAS6	1
GO:0046827	positive regulation of protein export from nucleus	1/30	21/17913	0.0346062	0.112692	0.071454	GAS6	1
GO:0051900	regulation of mitochondrial depolarization	1/30	21/17913	0.0346062	0.112692	0.071454	DCN	1
GO:0055093	response to hyperoxia	1/30	21/17913	0.0346062	0.112692	0.071454	COL1A1	1
GO:0071379	cellular response to prostaglandin stimulus	1/30	21/17913	0.0346062	0.112692	0.071454	TNC	1
GO:0097709	connective tissue replacement	1/30	21/17913	0.0346062	0.112692	0.071454	TIMP1	1
GO:1903010	regulation of bone development	1/30	21/17913	0.0346062	0.112692	0.071454	FBN1	1
GO:2000269	regulation of fibroblast apoptotic process	1/30	21/17913	0.0346062	0.112692	0.071454	GAS6	1
GO:0032799	low-density lipoprotein receptor particle metabolic process	1/30	22/17913	0.0362249	0.115532	0.0732548	APOE	1
GO:0051000	positive regulation of nitric-oxide synthase activity	1/30	22/17913	0.0362249	0.115532	0.0732548	APOE	1
GO:0097205	renal filtration	1/30	22/17913	0.0362249	0.115532	0.0732548	GAS6	1
GO:0010288	response to lead ion	1/30	23/17913	0.037841	0.117934	0.0747777	SPARC	1
GO:0051882	mitochondrial depolarization	1/30	23/17913	0.037841	0.117934	0.0747777	DCN	1
GO:0071305	cellular response to vitamin D	1/30	23/17913	0.037841	0.117934	0.0747777	TNC	1
GO:0090140	regulation of mitochondrial fission	1/30	23/17913	0.037841	0.117934	0.0747777	DCN	1
GO:1900746	regulation of vascular endothelial growth factor signaling pathway	1/30	23/17913	0.037841	0.117934	0.0747777	DCN	1
GO:1902003	regulation of amyloid-beta formation	1/30	23/17913	0.037841	0.117934	0.0747777	APOE	1
GO:0002407	dendritic cell chemotaxis	1/30	24/17913	0.0394544	0.119659	0.0758715	GAS6	1
GO:0010804	negative regulation of tumor necrosis factor-mediated signaling pathway	1/30	24/17913	0.0394544	0.119659	0.0758715	GAS6	1
GO:0031069	hair follicle morphogenesis	1/30	24/17913	0.0394544	0.119659	0.0758715	IGFBP5	1
GO:0044346	fibroblast apoptotic process	1/30	24/17913	0.0394544	0.119659	0.0758715	GAS6	1
GO:0060343	trabecula formation	1/30	24/17913	0.0394544	0.119659	0.0758715	COL1A1	1
GO:1902547	regulation of cellular response to vascular endothelial growth factor stimulus	1/30	24/17913	0.0394544	0.119659	0.0758715	DCN	1
GO:0002335	mature B cell differentiation	1/30	25/17913	0.0410653	0.120434	0.0763631	LGALS1	1
GO:0003071	renal system process involved in regulation of systemic arterial blood pressure	1/30	25/17913	0.0410653	0.120434	0.0763631	GAS6	1
GO:0034110	regulation of homotypic cell-cell adhesion	1/30	25/17913	0.0410653	0.120434	0.0763631	LGALS1	1
GO:0035640	exploration behavior	1/30	25/17913	0.0410653	0.120434	0.0763631	APOE	1
GO:0060740	prostate gland epithelium morphogenesis	1/30	25/17913	0.0410653	0.120434	0.0763631	TNC	1
GO:1905809	negative regulation of synapse organization	1/30	25/17913	0.0410653	0.120434	0.0763631	APOE	1
GO:0002021	response to dietary excess	1/30	26/17913	0.0426735	0.120434	0.0763631	APOE	1
GO:0007263	nitric oxide mediated signal transduction	1/30	26/17913	0.0426735	0.120434	0.0763631	APOE	1
GO:0019934	cGMP-mediated signaling	1/30	26/17913	0.0426735	0.120434	0.0763631	APOE	1
GO:0034377	plasma lipoprotein particle assembly	1/30	26/17913	0.0426735	0.120434	0.0763631	APOE	1
GO:0043501	skeletal muscle adaptation	1/30	26/17913	0.0426735	0.120434	0.0763631	IGFBP5	1
GO:0045992	negative regulation of embryonic development	1/30	26/17913	0.0426735	0.120434	0.0763631	COL5A2	1
GO:0060351	cartilage development involved in endochondral bone morphogenesis	1/30	26/17913	0.0426735	0.120434	0.0763631	COL1A1	1
GO:0070168	negative regulation of biomineral tissue development	1/30	26/17913	0.0426735	0.120434	0.0763631	GAS6	1
GO:0099560	synaptic membrane adhesion	1/30	26/17913	0.0426735	0.120434	0.0763631	SPARCL1	1
GO:1904754	positive regulation of vascular associated smooth muscle cell migration	1/30	26/17913	0.0426735	0.120434	0.0763631	IGFBP5	1
GO:0001958	endochondral ossification	1/30	27/17913	0.0442791	0.120767	0.0765745	COL1A1	1
GO:0002063	chondrocyte development	1/30	27/17913	0.0442791	0.120767	0.0765745	COL11A1	1
GO:0036075	replacement ossification	1/30	27/17913	0.0442791	0.120767	0.0765745	COL1A1	1
GO:0036336	dendritic cell migration	1/30	27/17913	0.0442791	0.120767	0.0765745	GAS6	1
GO:0044788	modulation by host of viral process	1/30	27/17913	0.0442791	0.120767	0.0765745	APOE	1
GO:0045671	negative regulation of osteoclast differentiation	1/30	27/17913	0.0442791	0.120767	0.0765745	FBN1	1
GO:0060512	prostate gland morphogenesis	1/30	27/17913	0.0442791	0.120767	0.0765745	TNC	1
GO:0010894	negative regulation of steroid biosynthetic process	1/30	28/17913	0.0458821	0.120767	0.0765745	APOE	1
GO:0032770	positive regulation of monooxygenase activity	1/30	28/17913	0.0458821	0.120767	0.0765745	APOE	1
GO:0032814	regulation of natural killer cell activation	1/30	28/17913	0.0458821	0.120767	0.0765745	GAS6	1
GO:0034367	protein-containing complex remodeling	1/30	28/17913	0.0458821	0.120767	0.0765745	APOE	1
GO:0034368	protein-lipid complex remodeling	1/30	28/17913	0.0458821	0.120767	0.0765745	APOE	1
GO:0034369	plasma lipoprotein particle remodeling	1/30	28/17913	0.0458821	0.120767	0.0765745	APOE	1
GO:0036296	response to increased oxygen levels	1/30	28/17913	0.0458821	0.120767	0.0765745	COL1A1	1
GO:0042311	vasodilation	1/30	28/17913	0.0458821	0.120767	0.0765745	APOE	1
GO:0048730	epidermis morphogenesis	1/30	28/17913	0.0458821	0.120767	0.0765745	IGFBP5	1
GO:0050974	detection of mechanical stimulus involved in sensory perception	1/30	28/17913	0.0458821	0.120767	0.0765745	COL11A1	1
GO:0003401	axis elongation	1/30	29/17913	0.0474826	0.123382	0.0782321	TNC	1
GO:0034205	amyloid-beta formation	1/30	29/17913	0.0474826	0.123382	0.0782321	APOE	1
GO:0045940	positive regulation of steroid metabolic process	1/30	29/17913	0.0474826	0.123382	0.0782321	APOE	1
GO:0060441	epithelial tube branching involved in lung morphogenesis	1/30	29/17913	0.0474826	0.123382	0.0782321	TNC	1
GO:0010543	regulation of platelet activation	1/30	30/17913	0.0490804	0.124044	0.078652	APOE	1
GO:0032689	negative regulation of interferon-gamma production	1/30	30/17913	0.0490804	0.124044	0.078652	GAS6	1
GO:0034694	response to prostaglandin	1/30	30/17913	0.0490804	0.124044	0.078652	TNC	1
GO:0045939	negative regulation of steroid metabolic process	1/30	30/17913	0.0490804	0.124044	0.078652	APOE	1
GO:0046596	regulation of viral entry into host cell	1/30	30/17913	0.0490804	0.124044	0.078652	LGALS1	1
GO:0060325	face morphogenesis	1/30	30/17913	0.0490804	0.124044	0.078652	COL1A1	1
GO:0061082	myeloid leukocyte cytokine production	1/30	30/17913	0.0490804	0.124044	0.078652	GAS6	1
GO:0065005	protein-lipid complex assembly	1/30	30/17913	0.0490804	0.124044	0.078652	APOE	1
GO:1902991	regulation of amyloid precursor protein catabolic process	1/30	30/17913	0.0490804	0.124044	0.078652	APOE	1
GO:0000266	mitochondrial fission	1/30	31/17913	0.0506756	0.126192	0.0800141	DCN	1
GO:0007616	long-term memory	1/30	33/17913	0.0538583	0.130909	0.083005	APOE	1
GO:0032801	receptor catabolic process	1/30	33/17913	0.0538583	0.130909	0.083005	APOE	1
GO:0048048	embryonic eye morphogenesis	1/30	33/17913	0.0538583	0.130909	0.083005	FBN1	1
GO:0055094	response to lipoprotein particle	1/30	33/17913	0.0538583	0.130909	0.083005	APOE	1
GO:0097242	amyloid-beta clearance	1/30	33/17913	0.0538583	0.130909	0.083005	APOE	1
GO:0098751	bone cell development	1/30	33/17913	0.0538583	0.130909	0.083005	FBN1	1
GO:2000352	negative regulation of endothelial cell apoptotic process	1/30	33/17913	0.0538583	0.130909	0.083005	GAS6	1
GO:0032148	activation of protein kinase B activity	1/30	34/17913	0.0554458	0.133807	0.0848427	GAS6	1
GO:0035909	aorta morphogenesis	1/30	34/17913	0.0554458	0.133807	0.0848427	COL3A1	1
GO:0007528	neuromuscular junction development	1/30	35/17913	0.0570307	0.136017	0.0862436	TNC	1
GO:0060323	head morphogenesis	1/30	35/17913	0.0570307	0.136017	0.0862436	COL1A1	1
GO:0060416	response to growth hormone	1/30	35/17913	0.0570307	0.136017	0.0862436	IGFBP5	1
GO:0071402	cellular response to lipoprotein particle stimulus	1/30	35/17913	0.0570307	0.136017	0.0862436	APOE	1
GO:0046825	regulation of protein export from nucleus	1/30	36/17913	0.0586131	0.137531	0.0872036	GAS6	1
GO:0050982	detection of mechanical stimulus	1/30	36/17913	0.0586131	0.137531	0.0872036	COL11A1	1
GO:0055090	acylglycerol homeostasis	1/30	36/17913	0.0586131	0.137531	0.0872036	APOE	1
GO:0070328	triglyceride homeostasis	1/30	36/17913	0.0586131	0.137531	0.0872036	APOE	1
GO:0071634	regulation of transforming growth factor beta production	1/30	36/17913	0.0586131	0.137531	0.0872036	LUM	1
GO:0098801	regulation of renal system process	1/30	36/17913	0.0586131	0.137531	0.0872036	GAS6	1
GO:0001662	behavioral fear response	1/30	37/17913	0.0601928	0.140266	0.0889378	APOE	1
GO:0001941	postsynaptic membrane organization	1/30	37/17913	0.0601928	0.140266	0.0889378	APOE	1
GO:0014912	negative regulation of smooth muscle cell migration	1/30	37/17913	0.0601928	0.140266	0.0889378	IGFBP5	1
GO:0002209	behavioral defense response	1/30	38/17913	0.0617701	0.141348	0.0896237	APOE	1
GO:0019068	virion assembly	1/30	38/17913	0.0617701	0.141348	0.0896237	APOE	1
GO:0032008	positive regulation of TOR signaling	1/30	38/17913	0.0617701	0.141348	0.0896237	GAS6	1
GO:0033280	response to vitamin D	1/30	38/17913	0.0617701	0.141348	0.0896237	TNC	1
GO:0071604	transforming growth factor beta production	1/30	38/17913	0.0617701	0.141348	0.0896237	LUM	1
GO:2001222	regulation of neuron migration	1/30	38/17913	0.0617701	0.141348	0.0896237	COL3A1	1
GO:0010874	regulation of cholesterol efflux	1/30	39/17913	0.0633447	0.143337	0.0908849	APOE	1
GO:0014741	negative regulation of muscle hypertrophy	1/30	39/17913	0.0633447	0.143337	0.0908849	IGFBP5	1
GO:0042596	fear response	1/30	39/17913	0.0633447	0.143337	0.0908849	APOE	1
GO:0090207	regulation of triglyceride metabolic process	1/30	39/17913	0.0633447	0.143337	0.0908849	APOE	1
GO:0032692	negative regulation of interleukin-1 production	1/30	40/17913	0.0649168	0.145276	0.0921147	GAS6	1
GO:0038084	vascular endothelial growth factor signaling pathway	1/30	40/17913	0.0649168	0.145276	0.0921147	DCN	1
GO:0042987	amyloid precursor protein catabolic process	1/30	40/17913	0.0649168	0.145276	0.0921147	APOE	1
GO:0048286	lung alveolus development	1/30	40/17913	0.0649168	0.145276	0.0921147	IGFBP5	1
GO:0050435	amyloid-beta metabolic process	1/30	40/17913	0.0649168	0.145276	0.0921147	APOE	1
GO:0006911	phagocytosis, engulfment	1/30	41/17913	0.0664863	0.148462	0.0941345	MFGE8	1
GO:0048247	lymphocyte chemotaxis	1/30	42/17913	0.0680533	0.150787	0.0956087	GAS6	1
GO:0060999	positive regulation of dendritic spine development	1/30	42/17913	0.0680533	0.150787	0.0956087	APOE	1
GO:1900271	regulation of long-term synaptic potentiation	1/30	42/17913	0.0680533	0.150787	0.0956087	APOE	1
GO:0010470	regulation of gastrulation	1/30	43/17913	0.0696178	0.152439	0.0966563	COL5A2	1
GO:0060443	mammary gland morphogenesis	1/30	43/17913	0.0696178	0.152439	0.0966563	IGFBP5	1
GO:0071364	cellular response to epidermal growth factor stimulus	1/30	43/17913	0.0696178	0.152439	0.0966563	COL1A1	1
GO:0097028	dendritic cell differentiation	1/30	43/17913	0.0696178	0.152439	0.0966563	GAS6	1
GO:0030850	prostate gland development	1/30	44/17913	0.0711797	0.154858	0.09819	TNC	1
GO:0032459	regulation of protein oligomerization	1/30	44/17913	0.0711797	0.154858	0.09819	APOE	1
GO:0071827	plasma lipoprotein particle organization	1/30	44/17913	0.0711797	0.154858	0.09819	APOE	1
GO:0001974	blood vessel remodeling	1/30	45/17913	0.0727391	0.157401	0.0998027	BGN	1
GO:0072604	interleukin-6 secretion	1/30	45/17913	0.0727391	0.157401	0.0998027	GAS6	1
GO:0030514	negative regulation of BMP signaling pathway	1/30	46/17913	0.074296	0.157918	0.10013	FBN1	1
GO:0060324	face development	1/30	46/17913	0.074296	0.157918	0.10013	COL1A1	1
GO:1904036	negative regulation of epithelial cell apoptotic process	1/30	46/17913	0.074296	0.157918	0.10013	GAS6	1
GO:1904738	vascular associated smooth muscle cell migration	1/30	46/17913	0.074296	0.157918	0.10013	IGFBP5	1
GO:1904752	regulation of vascular associated smooth muscle cell migration	1/30	46/17913	0.074296	0.157918	0.10013	IGFBP5	1
GO:2000107	negative regulation of leukocyte apoptotic process	1/30	46/17913	0.074296	0.157918	0.10013	GAS6	1
GO:0001961	positive regulation of cytokine-mediated signaling pathway	1/30	47/17913	0.0758503	0.159223	0.100958	GAS6	1
GO:0014911	positive regulation of smooth muscle cell migration	1/30	47/17913	0.0758503	0.159223	0.100958	IGFBP5	1
GO:0044764	multi-organism cellular process	1/30	47/17913	0.0758503	0.159223	0.100958	GAS6	1
GO:0048168	regulation of neuronal synaptic plasticity	1/30	47/17913	0.0758503	0.159223	0.100958	APOE	1
GO:0061383	trabecula morphogenesis	1/30	47/17913	0.0758503	0.159223	0.100958	COL1A1	1
GO:0070849	response to epidermal growth factor	1/30	47/17913	0.0758503	0.159223	0.100958	COL1A1	1
GO:0002762	negative regulation of myeloid leukocyte differentiation	1/30	48/17913	0.0774021	0.160266	0.101619	FBN1	1
GO:0010171	body morphogenesis	1/30	48/17913	0.0774021	0.160266	0.101619	COL1A1	1
GO:0031103	axon regeneration	1/30	48/17913	0.0774021	0.160266	0.101619	TNC	1
GO:0055010	ventricular cardiac muscle tissue morphogenesis	1/30	48/17913	0.0774021	0.160266	0.101619	COL11A1	1
GO:0071825	protein-lipid complex subunit organization	1/30	48/17913	0.0774021	0.160266	0.101619	APOE	1
GO:0003254	regulation of membrane depolarization	1/30	49/17913	0.0789514	0.160751	0.101926	DCN	1
GO:0030195	negative regulation of blood coagulation	1/30	49/17913	0.0789514	0.160751	0.101926	APOE	1
GO:0043113	receptor clustering	1/30	49/17913	0.0789514	0.160751	0.101926	APOE	1
GO:1903793	positive regulation of anion transport	1/30	49/17913	0.0789514	0.160751	0.101926	APOE	1
GO:1904707	positive regulation of vascular smooth muscle cell proliferation	1/30	49/17913	0.0789514	0.160751	0.101926	IGFBP5	1
GO:2001238	positive regulation of extrinsic apoptotic signaling pathway	1/30	49/17913	0.0789514	0.160751	0.101926	TIMP3	1
GO:0010718	positive regulation of epithelial to mesenchymal transition	1/30	50/17913	0.0804981	0.161633	0.102486	COL1A1	1
GO:0045540	regulation of cholesterol biosynthetic process	1/30	50/17913	0.0804981	0.161633	0.102486	APOE	1
GO:0055081	anion homeostasis	1/30	50/17913	0.0804981	0.161633	0.102486	APOE	1
GO:0060425	lung morphogenesis	1/30	50/17913	0.0804981	0.161633	0.102486	TNC	1
GO:0099024	plasma membrane invagination	1/30	50/17913	0.0804981	0.161633	0.102486	MFGE8	1
GO:0106118	regulation of sterol biosynthetic process	1/30	50/17913	0.0804981	0.161633	0.102486	APOE	1
GO:1900047	negative regulation of hemostasis	1/30	50/17913	0.0804981	0.161633	0.102486	APOE	1
GO:0045668	negative regulation of osteoblast differentiation	1/30	51/17913	0.0820424	0.163121	0.10343	IGFBP5	1
GO:0046579	positive regulation of Ras protein signal transduction	1/30	51/17913	0.0820424	0.163121	0.10343	COL3A1	1
GO:0048146	positive regulation of fibroblast proliferation	1/30	51/17913	0.0820424	0.163121	0.10343	GAS6	1
GO:0050999	regulation of nitric-oxide synthase activity	1/30	51/17913	0.0820424	0.163121	0.10343	APOE	1
GO:0043954	cellular component maintenance	1/30	52/17913	0.0835841	0.163625	0.103749	APOE	1
GO:0050704	regulation of interleukin-1 secretion	1/30	52/17913	0.0835841	0.163625	0.103749	GAS6	1
GO:0051353	positive regulation of oxidoreductase activity	1/30	52/17913	0.0835841	0.163625	0.103749	APOE	1
GO:0060350	endochondral bone morphogenesis	1/30	52/17913	0.0835841	0.163625	0.103749	COL1A1	1
GO:0071320	cellular response to cAMP	1/30	52/17913	0.0835841	0.163625	0.103749	IGFBP5	1
GO:2000242	negative regulation of reproductive process	1/30	52/17913	0.0835841	0.163625	0.103749	TIMP1	1
GO:0032964	collagen biosynthetic process	1/30	53/17913	0.0851234	0.165681	0.105052	COL1A1	1
GO:0050819	negative regulation of coagulation	1/30	53/17913	0.0851234	0.165681	0.105052	APOE	1
GO:0032715	negative regulation of interleukin-6 production	1/30	54/17913	0.0866601	0.167708	0.106338	GAS6	1
GO:0060760	positive regulation of response to cytokine stimulus	1/30	54/17913	0.0866601	0.167708	0.106338	GAS6	1
GO:0097755	positive regulation of blood vessel diameter	1/30	54/17913	0.0866601	0.167708	0.106338	APOE	1
GO:0003229	ventricular cardiac muscle tissue development	1/30	55/17913	0.0881944	0.169067	0.1072	COL11A1	1
GO:0031102	neuron projection regeneration	1/30	55/17913	0.0881944	0.169067	0.1072	TNC	1
GO:0031295	T cell costimulation	1/30	55/17913	0.0881944	0.169067	0.1072	LGALS1	1
GO:0042982	amyloid precursor protein metabolic process	1/30	55/17913	0.0881944	0.169067	0.1072	APOE	1
GO:0014888	striated muscle adaptation	1/30	56/17913	0.0897261	0.170396	0.108042	IGFBP5	1
GO:0031294	lymphocyte costimulation	1/30	56/17913	0.0897261	0.170396	0.108042	LGALS1	1
GO:0033344	cholesterol efflux	1/30	56/17913	0.0897261	0.170396	0.108042	APOE	1
GO:0061098	positive regulation of protein tyrosine kinase activity	1/30	56/17913	0.0897261	0.170396	0.108042	GAS6	1
GO:0071398	cellular response to fatty acid	1/30	56/17913	0.0897261	0.170396	0.108042	TNC	1
GO:0006879	cellular iron ion homeostasis	1/30	57/17913	0.0912554	0.171062	0.108464	CP	1
GO:0035904	aorta development	1/30	57/17913	0.0912554	0.171062	0.108464	COL3A1	1
GO:0046686	response to cadmium ion	1/30	57/17913	0.0912554	0.171062	0.108464	SPARC	1
GO:0051055	negative regulation of lipid biosynthetic process	1/30	57/17913	0.0912554	0.171062	0.108464	APOE	1
GO:1902041	regulation of extrinsic apoptotic signaling pathway via death domain receptors	1/30	57/17913	0.0912554	0.171062	0.108464	TIMP3	1
GO:0010324	membrane invagination	1/30	58/17913	0.0927822	0.172334	0.109271	MFGE8	1
GO:0032370	positive regulation of lipid transport	1/30	58/17913	0.0927822	0.172334	0.109271	APOE	1
GO:0051057	positive regulation of small GTPase mediated signal transduction	1/30	58/17913	0.0927822	0.172334	0.109271	COL3A1	1
GO:0070527	platelet aggregation	1/30	58/17913	0.0927822	0.172334	0.109271	GAS6	1
GO:1903902	positive regulation of viral life cycle	1/30	59/17913	0.0943065	0.173894	0.11026	LGALS1	1
GO:2000351	regulation of endothelial cell apoptotic process	1/30	59/17913	0.0943065	0.173894	0.11026	GAS6	1
GO:0032371	regulation of sterol transport	1/30	60/17913	0.0958283	0.175426	0.111232	APOE	1
GO:0032374	regulation of cholesterol transport	1/30	60/17913	0.0958283	0.175426	0.111232	APOE	1
GO:0046824	positive regulation of nucleocytoplasmic transport	1/30	60/17913	0.0958283	0.175426	0.111232	GAS6	1
GO:0050701	interleukin-1 secretion	1/30	60/17913	0.0958283	0.175426	0.111232	GAS6	1
GO:0010803	regulation of tumor necrosis factor-mediated signaling pathway	1/30	61/17913	0.0973477	0.177568	0.11259	GAS6	1
GO:0033627	cell adhesion mediated by integrin	1/30	61/17913	0.0973477	0.177568	0.11259	FBN1	1
GO:1901862	negative regulation of muscle tissue development	1/30	62/17913	0.0988646	0.179369	0.113731	IGFBP5	1
GO:0030101	natural killer cell activation	1/30	63/17913	0.100379	0.180505	0.114452	GAS6	1
GO:0055008	cardiac muscle tissue morphogenesis	1/30	63/17913	0.100379	0.180505	0.114452	COL11A1	1
GO:0090181	regulation of cholesterol metabolic process	1/30	63/17913	0.100379	0.180505	0.114452	APOE	1
GO:0015909	long-chain fatty acid transport	1/30	64/17913	0.101891	0.181616	0.115157	APOE	1
GO:0015914	phospholipid transport	1/30	64/17913	0.101891	0.181616	0.115157	APOE	1
GO:0019915	lipid storage	1/30	64/17913	0.101891	0.181616	0.115157	APOE	1
GO:0032768	regulation of monooxygenase activity	1/30	64/17913	0.101891	0.181616	0.115157	APOE	1
GO:0045670	regulation of osteoclast differentiation	1/30	64/17913	0.101891	0.181616	0.115157	FBN1	1
GO:0035924	cellular response to vascular endothelial growth factor stimulus	1/30	65/17913	0.103401	0.183342	0.116251	DCN	1
GO:0072577	endothelial cell apoptotic process	1/30	65/17913	0.103401	0.183342	0.116251	GAS6	1
GO:0016239	positive regulation of macroautophagy	1/30	66/17913	0.104908	0.18569	0.11774	DCN	1
GO:0061515	myeloid cell development	1/30	68/17913	0.107914	0.190349	0.120694	FBN1	1
GO:0032720	negative regulation of tumor necrosis factor production	1/30	69/17913	0.109414	0.191663	0.121527	GAS6	1
GO:0048662	negative regulation of smooth muscle cell proliferation	1/30	69/17913	0.109414	0.191663	0.121527	IGFBP5	1
GO:0050795	regulation of behavior	1/30	69/17913	0.109414	0.191663	0.121527	APOE	1
GO:1900006	positive regulation of dendrite development	1/30	69/17913	0.109414	0.191663	0.121527	APOE	1
GO:0034381	plasma lipoprotein particle clearance	1/30	70/17913	0.110911	0.193779	0.122869	APOE	1
GO:0001960	negative regulation of cytokine-mediated signaling pathway	1/30	71/17913	0.112406	0.193896	0.122943	GAS6	1
GO:0002312	B cell activation involved in immune response	1/30	71/17913	0.112406	0.193896	0.122943	LGALS1	1
GO:0033555	multicellular organismal response to stress	1/30	71/17913	0.112406	0.193896	0.122943	APOE	1
GO:0043407	negative regulation of MAP kinase activity	1/30	71/17913	0.112406	0.193896	0.122943	APOE	1
GO:0060998	regulation of dendritic spine development	1/30	71/17913	0.112406	0.193896	0.122943	APOE	1
GO:1903556	negative regulation of tumor necrosis factor superfamily cytokine production	1/30	71/17913	0.112406	0.193896	0.122943	GAS6	1
GO:0006695	cholesterol biosynthetic process	1/30	72/17913	0.113899	0.194817	0.123526	APOE	1
GO:0050710	negative regulation of cytokine secretion	1/30	72/17913	0.113899	0.194817	0.123526	GAS6	1
GO:0051651	maintenance of location in cell	1/30	72/17913	0.113899	0.194817	0.123526	APOE	1
GO:1902653	secondary alcohol biosynthetic process	1/30	72/17913	0.113899	0.194817	0.123526	APOE	1
GO:0003208	cardiac ventricle morphogenesis	1/30	73/17913	0.115389	0.196373	0.124514	COL11A1	1
GO:0051881	regulation of mitochondrial membrane potential	1/30	73/17913	0.115389	0.196373	0.124514	DCN	1
GO:0061045	negative regulation of wound healing	1/30	73/17913	0.115389	0.196373	0.124514	APOE	1
GO:0030193	regulation of blood coagulation	1/30	74/17913	0.116876	0.197253	0.125071	APOE	1
GO:0055072	iron ion homeostasis	1/30	74/17913	0.116876	0.197253	0.125071	CP	1
GO:0060291	long-term synaptic potentiation	1/30	74/17913	0.116876	0.197253	0.125071	APOE	1
GO:0070373	negative regulation of ERK1 and ERK2 cascade	1/30	74/17913	0.116876	0.197253	0.125071	TIMP3	1
GO:0016126	sterol biosynthetic process	1/30	75/17913	0.118361	0.198769	0.126032	APOE	1
GO:0031100	animal organ regeneration	1/30	75/17913	0.118361	0.198769	0.126032	GAS6	1
GO:1900046	regulation of hemostasis	1/30	75/17913	0.118361	0.198769	0.126032	APOE	1
GO:0030516	regulation of axon extension	1/30	76/17913	0.119844	0.200927	0.127401	APOE	1
GO:0030279	negative regulation of ossification	1/30	77/17913	0.121324	0.201744	0.127919	IGFBP5	1
GO:0051851	modification by host of symbiont morphology or physiology	1/30	77/17913	0.121324	0.201744	0.127919	APOE	1
GO:0060761	negative regulation of response to cytokine stimulus	1/30	77/17913	0.121324	0.201744	0.127919	GAS6	1
GO:0071260	cellular response to mechanical stimulus	1/30	77/17913	0.121324	0.201744	0.127919	COL1A1	1
GO:0097061	dendritic spine organization	1/30	77/17913	0.121324	0.201744	0.127919	APOE	1
GO:0022617	extracellular matrix disassembly	1/30	78/17913	0.122802	0.203204	0.128845	TIMP1	1
GO:0030512	negative regulation of transforming growth factor beta receptor signaling pathway	1/30	78/17913	0.122802	0.203204	0.128845	FBN1	1
GO:1905954	positive regulation of lipid localization	1/30	78/17913	0.122802	0.203204	0.128845	APOE	1
GO:0014743	regulation of muscle hypertrophy	1/30	79/17913	0.124278	0.204646	0.129759	IGFBP5	1
GO:0043154	negative regulation of cysteine-type endopeptidase activity involved in apoptotic process	1/30	79/17913	0.124278	0.204646	0.129759	GAS6	1
GO:0050818	regulation of coagulation	1/30	79/17913	0.124278	0.204646	0.129759	APOE	1
GO:1903845	negative regulation of cellular response to transforming growth factor beta stimulus	1/30	80/17913	0.125751	0.206152	0.130714	FBN1	1
GO:0002690	positive regulation of leukocyte chemotaxis	1/30	81/17913	0.127222	0.206152	0.130714	GAS6	1
GO:0014068	positive regulation of phosphatidylinositol 3-kinase signaling	1/30	81/17913	0.127222	0.206152	0.130714	DCN	1
GO:0030510	regulation of BMP signaling pathway	1/30	81/17913	0.127222	0.206152	0.130714	FBN1	1
GO:0043537	negative regulation of blood vessel endothelial cell migration	1/30	81/17913	0.127222	0.206152	0.130714	APOE	1
GO:0046889	positive regulation of lipid biosynthetic process	1/30	81/17913	0.127222	0.206152	0.130714	APOE	1
GO:0051702	interaction with symbiont	1/30	81/17913	0.127222	0.206152	0.130714	APOE	1
GO:0051899	membrane depolarization	1/30	81/17913	0.127222	0.206152	0.130714	DCN	1
GO:1902930	regulation of alcohol biosynthetic process	1/30	81/17913	0.127222	0.206152	0.130714	APOE	1
GO:0042158	lipoprotein biosynthetic process	1/30	82/17913	0.12869	0.207538	0.131593	APOE	1
GO:0045445	myoblast differentiation	1/30	82/17913	0.12869	0.207538	0.131593	LGALS1	1
GO:2000106	regulation of leukocyte apoptotic process	1/30	82/17913	0.12869	0.207538	0.131593	GAS6	1
GO:0003073	regulation of systemic arterial blood pressure	1/30	83/17913	0.130156	0.208846	0.132422	GAS6	1
GO:0008625	extrinsic apoptotic signaling pathway via death domain receptors	1/30	83/17913	0.130156	0.208846	0.132422	TIMP3	1
GO:0046916	cellular transition metal ion homeostasis	1/30	83/17913	0.130156	0.208846	0.132422	CP	1
GO:0001942	hair follicle development	1/30	85/17913	0.133081	0.210936	0.133747	IGFBP5	1
GO:0014910	regulation of smooth muscle cell migration	1/30	85/17913	0.133081	0.210936	0.133747	IGFBP5	1
GO:0042475	odontogenesis of dentin-containing tooth	1/30	85/17913	0.133081	0.210936	0.133747	TNC	1
GO:0045185	maintenance of protein location	1/30	85/17913	0.133081	0.210936	0.133747	FBN1	1
GO:0048704	embryonic skeletal system morphogenesis	1/30	85/17913	0.133081	0.210936	0.133747	COL11A1	1
GO:0070542	response to fatty acid	1/30	85/17913	0.133081	0.210936	0.133747	TNC	1
GO:0106027	neuron projection organization	1/30	85/17913	0.133081	0.210936	0.133747	APOE	1
GO:0033138	positive regulation of peptidyl-serine phosphorylation	1/30	86/17913	0.13454	0.21192	0.134371	GAS6	1
GO:0048145	regulation of fibroblast proliferation	1/30	86/17913	0.13454	0.21192	0.134371	GAS6	1
GO:0061097	regulation of protein tyrosine kinase activity	1/30	86/17913	0.13454	0.21192	0.134371	GAS6	1
GO:0022404	molting cycle process	1/30	87/17913	0.135996	0.21192	0.134371	IGFBP5	1
GO:0022405	hair cycle process	1/30	87/17913	0.135996	0.21192	0.134371	IGFBP5	1
GO:0048144	fibroblast proliferation	1/30	87/17913	0.135996	0.21192	0.134371	GAS6	1
GO:0072676	lymphocyte migration	1/30	87/17913	0.135996	0.21192	0.134371	GAS6	1
GO:0098773	skin epidermis development	1/30	87/17913	0.135996	0.21192	0.134371	IGFBP5	1
GO:1903035	negative regulation of response to wounding	1/30	87/17913	0.135996	0.21192	0.134371	APOE	1
GO:2000117	negative regulation of cysteine-type endopeptidase activity	1/30	87/17913	0.135996	0.21192	0.134371	GAS6	1
GO:0009791	post-embryonic development	1/30	88/17913	0.13745	0.212233	0.13457	FBN1	1
GO:0070167	regulation of biomineral tissue development	1/30	88/17913	0.13745	0.212233	0.13457	GAS6	1
GO:0097306	cellular response to alcohol	1/30	88/17913	0.13745	0.212233	0.13457	TNC	1
GO:1904035	regulation of epithelial cell apoptotic process	1/30	88/17913	0.13745	0.212233	0.13457	GAS6	1
GO:1904705	regulation of vascular smooth muscle cell proliferation	1/30	88/17913	0.13745	0.212233	0.13457	IGFBP5	1
GO:1990874	vascular smooth muscle cell proliferation	1/30	88/17913	0.13745	0.212233	0.13457	IGFBP5	1
GO:0015908	fatty acid transport	1/30	90/17913	0.140351	0.214705	0.136137	APOE	1
GO:0060349	bone morphogenesis	1/30	90/17913	0.140351	0.214705	0.136137	COL1A1	1
GO:0061387	regulation of extent of cell growth	1/30	90/17913	0.140351	0.214705	0.136137	APOE	1
GO:0000041	transition metal ion transport	1/30	91/17913	0.141798	0.214705	0.136137	CP	1
GO:0001523	retinoid metabolic process	1/30	91/17913	0.141798	0.214705	0.136137	APOE	1
GO:0001656	metanephros development	1/30	91/17913	0.141798	0.214705	0.136137	FBN1	1
GO:0010717	regulation of epithelial to mesenchymal transition	1/30	91/17913	0.141798	0.214705	0.136137	COL1A1	1
GO:0014909	smooth muscle cell migration	1/30	91/17913	0.141798	0.214705	0.136137	IGFBP5	1
GO:0042632	cholesterol homeostasis	1/30	91/17913	0.141798	0.214705	0.136137	APOE	1
GO:0043473	pigmentation	1/30	91/17913	0.141798	0.214705	0.136137	SPARC	1
GO:0045833	negative regulation of lipid metabolic process	1/30	91/17913	0.141798	0.214705	0.136137	APOE	1
GO:1901655	cellular response to ketone	1/30	91/17913	0.141798	0.214705	0.136137	TNC	1
GO:0045638	negative regulation of myeloid cell differentiation	1/30	92/17913	0.143243	0.216247	0.137115	FBN1	1
GO:0055092	sterol homeostasis	1/30	92/17913	0.143243	0.216247	0.137115	APOE	1
GO:0032092	positive regulation of protein binding	1/30	93/17913	0.144685	0.216814	0.137474	APOE	1
GO:0032649	regulation of interferon-gamma production	1/30	93/17913	0.144685	0.216814	0.137474	GAS6	1
GO:0044070	regulation of anion transport	1/30	93/17913	0.144685	0.216814	0.137474	APOE	1
GO:0045621	positive regulation of lymphocyte differentiation	1/30	93/17913	0.144685	0.216814	0.137474	GAS6	1
GO:0015748	organophosphate ester transport	1/30	94/17913	0.146125	0.217051	0.137625	APOE	1
GO:0030316	osteoclast differentiation	1/30	94/17913	0.146125	0.217051	0.137625	FBN1	1
GO:0060996	dendritic spine development	1/30	94/17913	0.146125	0.217051	0.137625	APOE	1
GO:1990823	response to leukemia inhibitory factor	1/30	94/17913	0.146125	0.217051	0.137625	PCOLCE	1
GO:1990830	cellular response to leukemia inhibitory factor	1/30	94/17913	0.146125	0.217051	0.137625	PCOLCE	1
GO:0006641	triglyceride metabolic process	1/30	95/17913	0.147562	0.218547	0.138573	APOE	1
GO:0042472	inner ear morphogenesis	1/30	95/17913	0.147562	0.218547	0.138573	COL11A1	1
GO:0032652	regulation of interleukin-1 production	1/30	96/17913	0.148998	0.220352	0.139717	GAS6	1
GO:0002062	chondrocyte differentiation	1/30	97/17913	0.150431	0.221825	0.140652	COL11A1	1
GO:0016101	diterpenoid metabolic process	1/30	97/17913	0.150431	0.221825	0.140652	APOE	1
GO:0030301	cholesterol transport	1/30	98/17913	0.151861	0.222642	0.14117	APOE	1
GO:0032006	regulation of TOR signaling	1/30	98/17913	0.151861	0.222642	0.14117	GAS6	1
GO:0099175	regulation of postsynapse organization	1/30	98/17913	0.151861	0.222642	0.14117	APOE	1
GO:0098869	cellular oxidant detoxification	1/30	99/17913	0.153289	0.223777	0.141889	APOE	1
GO:1902106	negative regulation of leukocyte differentiation	1/30	99/17913	0.153289	0.223777	0.141889	FBN1	1
GO:0046822	regulation of nucleocytoplasmic transport	1/30	100/17913	0.154715	0.225525	0.142997	GAS6	1
GO:0002367	cytokine production involved in immune response	1/30	101/17913	0.156139	0.226625	0.143695	GAS6	1
GO:0048661	positive regulation of smooth muscle cell proliferation	1/30	101/17913	0.156139	0.226625	0.143695	IGFBP5	1
GO:0048675	axon extension	1/30	101/17913	0.156139	0.226625	0.143695	APOE	1
GO:0097006	regulation of plasma lipoprotein particle levels	1/30	102/17913	0.15756	0.228036	0.14459	APOE	1
GO:0014812	muscle cell migration	1/30	103/17913	0.158979	0.228729	0.145029	IGFBP5	1
GO:0071887	leukocyte apoptotic process	1/30	103/17913	0.158979	0.228729	0.145029	GAS6	1
GO:0002688	regulation of leukocyte chemotaxis	1/30	105/17913	0.16181	0.230251	0.145994	GAS6	1
GO:0032609	interferon-gamma production	1/30	105/17913	0.16181	0.230251	0.145994	GAS6	1
GO:0051341	regulation of oxidoreductase activity	1/30	105/17913	0.16181	0.230251	0.145994	APOE	1
GO:0055076	transition metal ion homeostasis	1/30	105/17913	0.16181	0.230251	0.145994	CP	1
GO:0006721	terpenoid metabolic process	1/30	106/17913	0.163222	0.231611	0.146857	APOE	1
GO:0043502	regulation of muscle adaptation	1/30	106/17913	0.163222	0.231611	0.146857	IGFBP5	1
GO:0015918	sterol transport	1/30	107/17913	0.164632	0.232637	0.147507	APOE	1
GO:0062014	negative regulation of small molecule metabolic process	1/30	107/17913	0.164632	0.232637	0.147507	APOE	1
GO:1990748	cellular detoxification	1/30	107/17913	0.164632	0.232637	0.147507	APOE	1
GO:0030282	bone mineralization	1/30	108/17913	0.166039	0.233969	0.148351	COL1A2	1
GO:0032612	interleukin-1 production	1/30	108/17913	0.166039	0.233969	0.148351	GAS6	1
GO:0042303	molting cycle	1/30	109/17913	0.167445	0.234977	0.148991	IGFBP5	1
GO:0042633	hair cycle	1/30	109/17913	0.167445	0.234977	0.148991	IGFBP5	1
GO:0014897	striated muscle hypertrophy	1/30	111/17913	0.170248	0.237599	0.150653	IGFBP5	1
GO:0021782	glial cell development	1/30	111/17913	0.170248	0.237599	0.150653	MXRA8	1
GO:1904019	epithelial cell apoptotic process	1/30	111/17913	0.170248	0.237599	0.150653	GAS6	1
GO:0007613	memory	1/30	112/17913	0.171646	0.23855	0.151256	APOE	1
GO:0021987	cerebral cortex development	1/30	112/17913	0.171646	0.23855	0.151256	COL3A1	1
GO:0042157	lipoprotein metabolic process	1/30	112/17913	0.171646	0.23855	0.151256	APOE	1
GO:0006639	acylglycerol metabolic process	1/30	113/17913	0.173042	0.23855	0.151256	APOE	1
GO:0010508	positive regulation of autophagy	1/30	113/17913	0.173042	0.23855	0.151256	DCN	1
GO:0014896	muscle hypertrophy	1/30	113/17913	0.173042	0.23855	0.151256	IGFBP5	1
GO:0030183	B cell differentiation	1/30	113/17913	0.173042	0.23855	0.151256	LGALS1	1
GO:0051817	modification of morphology or physiology of other organism involved in symbiotic interaction	1/30	113/17913	0.173042	0.23855	0.151256	APOE	1
GO:0098754	detoxification	1/30	113/17913	0.173042	0.23855	0.151256	APOE	1
GO:0006638	neutral lipid metabolic process	1/30	114/17913	0.174436	0.239752	0.152018	APOE	1
GO:0010822	positive regulation of mitochondrion organization	1/30	115/17913	0.175828	0.240432	0.15245	DCN	1
GO:0017015	regulation of transforming growth factor beta receptor signaling pathway	1/30	115/17913	0.175828	0.240432	0.15245	FBN1	1
GO:0042471	ear morphogenesis	1/30	115/17913	0.175828	0.240432	0.15245	COL11A1	1
GO:0031929	TOR signaling	1/30	116/17913	0.177217	0.241357	0.153036	GAS6	1
GO:0002761	regulation of myeloid leukocyte differentiation	1/30	117/17913	0.178604	0.241626	0.153207	FBN1	1
GO:0014066	regulation of phosphatidylinositol 3-kinase signaling	1/30	117/17913	0.178604	0.241626	0.153207	DCN	1
GO:0061025	membrane fusion	1/30	117/17913	0.178604	0.241626	0.153207	GAS6	1
GO:1903844	regulation of cellular response to transforming growth factor beta stimulus	1/30	117/17913	0.178604	0.241626	0.153207	FBN1	1
GO:0033135	regulation of peptidyl-serine phosphorylation	1/30	119/17913	0.181371	0.245044	0.155374	GAS6	1
GO:0003014	renal system process	1/30	120/17913	0.182751	0.246253	0.156141	GAS6	1
GO:0019079	viral genome replication	1/30	120/17913	0.182751	0.246253	0.156141	GAS6	1
GO:0002687	positive regulation of leukocyte migration	1/30	121/17913	0.184129	0.246328	0.156188	GAS6	1
GO:0006720	isoprenoid metabolic process	1/30	121/17913	0.184129	0.246328	0.156188	APOE	1
GO:0043500	muscle adaptation	1/30	121/17913	0.184129	0.246328	0.156188	IGFBP5	1
GO:0090101	negative regulation of transmembrane receptor protein serine/threonine kinase signaling pathway	1/30	121/17913	0.184129	0.246328	0.156188	FBN1	1
GO:0032368	regulation of lipid transport	1/30	122/17913	0.185505	0.24734	0.156829	APOE	1
GO:1902904	negative regulation of supramolecular fiber organization	1/30	122/17913	0.185505	0.24734	0.156829	APOE	1
GO:0009581	detection of external stimulus	1/30	125/17913	0.189618	0.251833	0.159679	COL11A1	1
GO:0035296	regulation of tube diameter	1/30	125/17913	0.189618	0.251833	0.159679	APOE	1
GO:0097746	regulation of blood vessel diameter	1/30	125/17913	0.189618	0.251833	0.159679	APOE	1
GO:0051592	response to calcium ion	1/30	126/17913	0.190985	0.252987	0.16041	SPARC	1
GO:0051668	localization within membrane	1/30	126/17913	0.190985	0.252987	0.16041	APOE	1
GO:0009582	detection of abiotic stimulus	1/30	128/17913	0.193712	0.254937	0.161647	COL11A1	1
GO:0032355	response to estradiol	1/30	128/17913	0.193712	0.254937	0.161647	COL1A1	1
GO:0045667	regulation of osteoblast differentiation	1/30	128/17913	0.193712	0.254937	0.161647	IGFBP5	1
GO:0045995	regulation of embryonic development	1/30	128/17913	0.193712	0.254937	0.161647	COL5A2	1
GO:0003206	cardiac chamber morphogenesis	1/30	129/17913	0.195072	0.255403	0.161942	COL11A1	1
GO:0008037	cell recognition	1/30	129/17913	0.195072	0.255403	0.161942	MFGE8	1
GO:0010595	positive regulation of endothelial cell migration	1/30	129/17913	0.195072	0.255403	0.161942	SPARC	1
GO:1903364	positive regulation of cellular protein catabolic process	1/30	129/17913	0.195072	0.255403	0.161942	APOE	1
GO:0050921	positive regulation of chemotaxis	1/30	130/17913	0.19643	0.25685	0.16286	GAS6	1
GO:0003231	cardiac ventricle development	1/30	131/17913	0.197785	0.25829	0.163773	COL11A1	1
GO:0048565	digestive tract development	1/30	132/17913	0.199139	0.259059	0.16426	COL3A1	1
GO:0055088	lipid homeostasis	1/30	132/17913	0.199139	0.259059	0.16426	APOE	1
GO:0050880	regulation of blood vessel size	1/30	133/17913	0.20049	0.260483	0.165163	APOE	1
GO:0035150	regulation of tube size	1/30	134/17913	0.201839	0.261901	0.166062	APOE	1
GO:0090263	positive regulation of canonical Wnt signaling pathway	1/30	135/17913	0.203186	0.262977	0.166744	COL1A1	1
GO:2000241	regulation of reproductive process	1/30	135/17913	0.203186	0.262977	0.166744	TIMP1	1
GO:0009267	cellular response to starvation	1/30	136/17913	0.20453	0.264044	0.167421	GAS6	1
GO:0071901	negative regulation of protein serine/threonine kinase activity	1/30	136/17913	0.20453	0.264044	0.167421	APOE	1
GO:0015718	monocarboxylic acid transport	1/30	137/17913	0.205873	0.26544	0.168306	APOE	1
GO:0014065	phosphatidylinositol 3-kinase signaling	1/30	138/17913	0.207213	0.266155	0.16876	DCN	1
GO:0030879	mammary gland development	1/30	138/17913	0.207213	0.266155	0.16876	IGFBP5	1
GO:0044344	cellular response to fibroblast growth factor stimulus	1/30	138/17913	0.207213	0.266155	0.16876	COL1A1	1
GO:0032675	regulation of interleukin-6 production	1/30	139/17913	0.208551	0.267198	0.169421	GAS6	1
GO:0050773	regulation of dendrite development	1/30	139/17913	0.208551	0.267198	0.169421	APOE	1
GO:0001837	epithelial to mesenchymal transition	1/30	140/17913	0.209887	0.267896	0.169863	COL1A1	1
GO:0007338	single fertilization	1/30	140/17913	0.209887	0.267896	0.169863	MFGE8	1
GO:0017038	protein import	1/30	140/17913	0.209887	0.267896	0.169863	APOE	1
GO:0008203	cholesterol metabolic process	1/30	143/17913	0.213881	0.27129	0.172016	APOE	1
GO:0050777	negative regulation of immune response	1/30	143/17913	0.213881	0.27129	0.172016	COL3A1	1
GO:0055123	digestive system development	1/30	143/17913	0.213881	0.27129	0.172016	COL3A1	1
GO:0061041	regulation of wound healing	1/30	143/17913	0.213881	0.27129	0.172016	APOE	1
GO:1902107	positive regulation of leukocyte differentiation	1/30	143/17913	0.213881	0.27129	0.172016	GAS6	1
GO:0042542	response to hydrogen peroxide	1/30	144/17913	0.215209	0.272294	0.172652	COL1A1	1
GO:0045834	positive regulation of lipid metabolic process	1/30	144/17913	0.215209	0.272294	0.172652	APOE	1
GO:0046165	alcohol biosynthetic process	1/30	145/17913	0.216534	0.273289	0.173283	APOE	1
GO:0050806	positive regulation of synaptic transmission	1/30	145/17913	0.216534	0.273289	0.173283	APOE	1
GO:0048754	branching morphogenesis of an epithelial tube	1/30	146/17913	0.217856	0.274618	0.174126	TNC	1
GO:1902652	secondary alcohol metabolic process	1/30	147/17913	0.219177	0.275599	0.174748	APOE	1
GO:1903900	regulation of viral life cycle	1/30	147/17913	0.219177	0.275599	0.174748	LGALS1	1
GO:0050770	regulation of axonogenesis	1/30	148/17913	0.220496	0.276572	0.175365	APOE	1
GO:1990138	neuron projection extension	1/30	148/17913	0.220496	0.276572	0.175365	APOE	1
GO:0032635	interleukin-6 production	1/30	149/17913	0.221812	0.27788	0.176194	GAS6	1
GO:0090316	positive regulation of intracellular protein transport	1/30	150/17913	0.223126	0.279182	0.17702	GAS6	1
GO:0001890	placenta development	1/30	151/17913	0.224438	0.279448	0.177188	DCN	1
GO:0032680	regulation of tumor necrosis factor production	1/30	151/17913	0.224438	0.279448	0.177188	GAS6	1
GO:1905952	regulation of lipid localization	1/30	151/17913	0.224438	0.279448	0.177188	APOE	1
GO:2001236	regulation of extrinsic apoptotic signaling pathway	1/30	151/17913	0.224438	0.279448	0.177188	TIMP3	1
GO:1901861	regulation of muscle tissue development	1/30	152/17913	0.225748	0.280391	0.177786	IGFBP5	1
GO:1903707	negative regulation of hemopoiesis	1/30	152/17913	0.225748	0.280391	0.177786	FBN1	1
GO:0008361	regulation of cell size	1/30	154/17913	0.228362	0.283291	0.179625	APOE	1
GO:0016125	sterol metabolic process	1/30	155/17913	0.229665	0.283868	0.179991	APOE	1
GO:0032640	tumor necrosis factor production	1/30	155/17913	0.229665	0.283868	0.179991	GAS6	1
GO:1903555	regulation of tumor necrosis factor superfamily cytokine production	1/30	155/17913	0.229665	0.283868	0.179991	GAS6	1
GO:0007519	skeletal muscle tissue development	1/30	156/17913	0.230966	0.28513	0.180791	DCN	1
GO:0002285	lymphocyte activation involved in immune response	1/30	158/17913	0.233563	0.286941	0.181939	LGALS1	1
GO:0009408	response to heat	1/30	158/17913	0.233563	0.286941	0.181939	IGFBP7	1
GO:0043535	regulation of blood vessel endothelial cell migration	1/30	158/17913	0.233563	0.286941	0.181939	APOE	1
GO:0099173	postsynapse organization	1/30	158/17913	0.233563	0.286941	0.181939	APOE	1
GO:0035821	modification of morphology or physiology of other organism	1/30	160/17913	0.236151	0.28942	0.183511	APOE	1
GO:0048015	phosphatidylinositol-mediated signaling	1/30	160/17913	0.236151	0.28942	0.183511	DCN	1
GO:0003018	vascular process in circulatory system	1/30	161/17913	0.237442	0.290302	0.18407	APOE	1
GO:0071706	tumor necrosis factor superfamily cytokine production	1/30	161/17913	0.237442	0.290302	0.18407	GAS6	1
GO:0006611	protein export from nucleus	1/30	163/17913	0.240017	0.292746	0.18562	GAS6	1
GO:0048017	inositol lipid-mediated signaling	1/30	163/17913	0.240017	0.292746	0.18562	DCN	1
GO:0045619	regulation of lymphocyte differentiation	1/30	164/17913	0.241301	0.293959	0.186389	GAS6	1
GO:0060538	skeletal muscle organ development	1/30	165/17913	0.242584	0.295168	0.187156	DCN	1
GO:0016241	regulation of macroautophagy	1/30	166/17913	0.243864	0.295663	0.18747	DCN	1
GO:0019935	cyclic-nucleotide-mediated signaling	1/30	166/17913	0.243864	0.295663	0.18747	APOE	1
GO:0021543	pallium development	1/30	166/17913	0.243864	0.295663	0.18747	COL3A1	1
GO:0033209	tumor necrosis factor-mediated signaling pathway	1/30	167/17913	0.245142	0.296505	0.188004	GAS6	1
GO:0061136	regulation of proteasomal protein catabolic process	1/30	167/17913	0.245142	0.296505	0.188004	APOE	1
GO:0048167	regulation of synaptic plasticity	1/30	169/17913	0.247692	0.298992	0.189581	APOE	1
GO:0001959	regulation of cytokine-mediated signaling pathway	1/30	170/17913	0.248964	0.298992	0.189581	GAS6	1
GO:0003205	cardiac chamber development	1/30	170/17913	0.248964	0.298992	0.189581	COL11A1	1
GO:0009566	fertilization	1/30	170/17913	0.248964	0.298992	0.189581	MFGE8	1
GO:0030177	positive regulation of Wnt signaling pathway	1/30	170/17913	0.248964	0.298992	0.189581	COL1A1	1
GO:0050728	negative regulation of inflammatory response	1/30	170/17913	0.248964	0.298992	0.189581	APOE	1
GO:0043433	negative regulation of DNA-binding transcription factor activity	1/30	171/17913	0.250234	0.300163	0.190323	GAS6	1
GO:0006888	ER to Golgi vesicle-mediated transport	1/30	172/17913	0.251502	0.300619	0.190612	GAS6	1
GO:0043123	positive regulation of I-kappaB kinase/NF-kappaB signaling	1/30	172/17913	0.251502	0.300619	0.190612	LGALS1	1
GO:0048660	regulation of smooth muscle cell proliferation	1/30	172/17913	0.251502	0.300619	0.190612	IGFBP5	1
GO:0010634	positive regulation of epithelial cell migration	1/30	173/17913	0.252768	0.301422	0.191121	SPARC	1
GO:1903034	regulation of response to wounding	1/30	173/17913	0.252768	0.301422	0.191121	APOE	1
GO:0048659	smooth muscle cell proliferation	1/30	174/17913	0.254031	0.302574	0.191852	IGFBP5	1
GO:0010821	regulation of mitochondrion organization	1/30	175/17913	0.255293	0.303721	0.192579	DCN	1
GO:0051168	nuclear export	1/30	176/17913	0.256552	0.304862	0.193303	GAS6	1
GO:0043112	receptor metabolic process	1/30	177/17913	0.25781	0.305998	0.194023	APOE	1
GO:0061138	morphogenesis of a branching epithelium	1/30	178/17913	0.259065	0.306772	0.194513	TNC	1
GO:2001235	positive regulation of apoptotic signaling pathway	1/30	178/17913	0.259065	0.306772	0.194513	TIMP3	1
GO:0010952	positive regulation of peptidase activity	1/30	180/17913	0.26157	0.309377	0.196165	PCOLCE	1
GO:0051099	positive regulation of binding	1/30	181/17913	0.262819	0.310493	0.196873	APOE	1
GO:0043534	blood vessel endothelial cell migration	1/30	182/17913	0.264066	0.310882	0.19712	APOE	1
GO:0043901	negative regulation of multi-organism process	1/30	182/17913	0.264066	0.310882	0.19712	TIMP1	1
GO:1903708	positive regulation of hemopoiesis	1/30	182/17913	0.264066	0.310882	0.19712	GAS6	1
GO:0060759	regulation of response to cytokine stimulus	1/30	183/17913	0.265311	0.311987	0.19782	GAS6	1
GO:0050731	positive regulation of peptidyl-tyrosine phosphorylation	1/30	184/17913	0.266555	0.313086	0.198517	GAS6	1
GO:1902905	positive regulation of supramolecular fiber organization	1/30	185/17913	0.267796	0.314181	0.199211	APOE	1
GO:0002685	regulation of leukocyte migration	1/30	186/17913	0.269035	0.314907	0.199672	GAS6	1
GO:0050920	regulation of chemotaxis	1/30	186/17913	0.269035	0.314907	0.199672	GAS6	1
GO:0050866	negative regulation of cell activation	1/30	187/17913	0.270272	0.315991	0.200359	APOE	1
GO:0030595	leukocyte chemotaxis	1/30	188/17913	0.271507	0.31707	0.201043	GAS6	1
GO:0002440	production of molecular mediator of immune response	1/30	191/17913	0.2752	0.321014	0.203544	GAS6	1
GO:0001763	morphogenesis of a branching structure	1/30	192/17913	0.276427	0.321338	0.203749	TNC	1
GO:0030258	lipid modification	1/30	192/17913	0.276427	0.321338	0.203749	APOE	1
GO:0045732	positive regulation of protein catabolic process	1/30	192/17913	0.276427	0.321338	0.203749	APOE	1
GO:0007626	locomotory behavior	1/30	194/17913	0.278874	0.323813	0.205319	APOE	1
GO:0043281	regulation of cysteine-type endopeptidase activity involved in apoptotic process	1/30	196/17913	0.281314	0.326273	0.206879	GAS6	1
GO:0017148	negative regulation of translation	1/30	198/17913	0.283746	0.327971	0.207955	IGFBP5	1
GO:0050870	positive regulation of T cell activation	1/30	198/17913	0.283746	0.327971	0.207955	LGALS1	1
GO:1903050	regulation of proteolysis involved in cellular protein catabolic process	1/30	198/17913	0.283746	0.327971	0.207955	APOE	1
GO:0030278	regulation of ossification	1/30	199/17913	0.284959	0.328625	0.20837	IGFBP5	1
GO:0048762	mesenchymal cell differentiation	1/30	199/17913	0.284959	0.328625	0.20837	COL1A1	1
GO:0002573	myeloid leukocyte differentiation	1/30	201/17913	0.287379	0.330665	0.209663	FBN1	1
GO:0050707	regulation of cytokine secretion	1/30	201/17913	0.287379	0.330665	0.209663	GAS6	1
GO:0032388	positive regulation of intracellular transport	1/30	203/17913	0.289791	0.333063	0.211184	GAS6	1
GO:1901215	negative regulation of neuron death	1/30	207/17913	0.294592	0.338198	0.21444	APOE	1
GO:0010001	glial cell differentiation	1/30	212/17913	0.300548	0.344647	0.218529	MXRA8	1
GO:0097191	extrinsic apoptotic signaling pathway	1/30	213/17913	0.301734	0.345616	0.219143	TIMP3	1
GO:0007160	cell-matrix adhesion	1/30	214/17913	0.302917	0.346191	0.219508	COL3A1	1
GO:1903039	positive regulation of leukocyte cell-cell adhesion	1/30	214/17913	0.302917	0.346191	0.219508	LGALS1	1
GO:0042113	B cell activation	1/30	215/17913	0.304099	0.346761	0.219869	LGALS1	1
GO:0090092	regulation of transmembrane receptor protein serine/threonine kinase signaling pathway	1/30	215/17913	0.304099	0.346761	0.219869	FBN1	1
GO:0016358	dendrite development	1/30	216/17913	0.305278	0.347327	0.220228	APOE	1
GO:0048588	developmental cell growth	1/30	216/17913	0.305278	0.347327	0.220228	APOE	1
GO:0043393	regulation of protein binding	1/30	217/17913	0.306456	0.348277	0.22083	APOE	1
GO:0009266	response to temperature stimulus	1/30	219/17913	0.308806	0.350555	0.222275	IGFBP7	1
GO:0033157	regulation of intracellular protein transport	1/30	220/17913	0.309977	0.351492	0.222869	GAS6	1
GO:0048738	cardiac muscle tissue development	1/30	221/17913	0.311147	0.352426	0.223461	COL11A1	1
GO:0006469	negative regulation of protein kinase activity	1/30	222/17913	0.312316	0.352962	0.223801	APOE	1
GO:2000116	regulation of cysteine-type endopeptidase activity	1/30	222/17913	0.312316	0.352962	0.223801	GAS6	1
GO:0034504	protein localization to nucleus	1/30	223/17913	0.313482	0.353886	0.224387	COL1A1	1
GO:0043122	regulation of I-kappaB kinase/NF-kappaB signaling	1/30	224/17913	0.314646	0.354806	0.22497	LGALS1	1
GO:0015850	organic hydroxy compound transport	1/30	228/17913	0.319284	0.359637	0.228033	APOE	1
GO:0050663	cytokine secretion	1/30	230/17913	0.321591	0.361435	0.229173	GAS6	1
GO:1903362	regulation of cellular protein catabolic process	1/30	230/17913	0.321591	0.361435	0.229173	APOE	1
GO:0007050	cell cycle arrest	1/30	231/17913	0.322742	0.361927	0.229486	GAS6	1
GO:0018105	peptidyl-serine phosphorylation	1/30	231/17913	0.322742	0.361927	0.229486	GAS6	1
GO:0098742	cell-cell adhesion via plasma-membrane adhesion molecules	1/30	233/17913	0.325039	0.364101	0.230864	SPARCL1	1
GO:0031348	negative regulation of defense response	1/30	237/17913	0.329609	0.368407	0.233594	APOE	1
GO:0072659	protein localization to plasma membrane	1/30	237/17913	0.329609	0.368407	0.233594	GAS6	1
GO:0097237	cellular response to toxic substance	1/30	241/17913	0.334149	0.372662	0.236292	APOE	1
GO:1901617	organic hydroxy compound biosynthetic process	1/30	241/17913	0.334149	0.372662	0.236292	APOE	1
GO:0033002	muscle cell proliferation	1/30	243/17913	0.336407	0.37477	0.237629	IGFBP5	1
GO:0033673	negative regulation of kinase activity	1/30	244/17913	0.337534	0.375202	0.237903	APOE	1
GO:0045926	negative regulation of growth	1/30	244/17913	0.337534	0.375202	0.237903	IGFBP5	1
GO:0050730	regulation of peptidyl-tyrosine phosphorylation	1/30	245/17913	0.338659	0.376041	0.238435	GAS6	1
GO:0021537	telencephalon development	1/30	246/17913	0.339782	0.376876	0.238964	COL3A1	1
GO:0007611	learning or memory	1/30	247/17913	0.340903	0.377707	0.239491	APOE	1
GO:0003007	heart morphogenesis	1/30	249/17913	0.34314	0.379771	0.2408	COL11A1	1
GO:0045637	regulation of myeloid cell differentiation	1/30	250/17913	0.344255	0.380591	0.24132	FBN1	1
GO:0022409	positive regulation of cell-cell adhesion	1/30	251/17913	0.345369	0.380993	0.241575	LGALS1	1
GO:0090257	regulation of muscle system process	1/30	251/17913	0.345369	0.380993	0.241575	IGFBP5	1
GO:0007249	I-kappaB kinase/NF-kappaB signaling	1/30	253/17913	0.347591	0.382614	0.242602	LGALS1	1
GO:0060326	cell chemotaxis	1/30	253/17913	0.347591	0.382614	0.242602	GAS6	1
GO:0060485	mesenchyme development	1/30	258/17913	0.353114	0.388273	0.24619	COL1A1	1
GO:0010769	regulation of cell morphogenesis involved in differentiation	1/30	260/17913	0.355311	0.390266	0.247454	APOE	1
GO:0051146	striated muscle cell differentiation	1/30	263/17913	0.358592	0.393445	0.24947	IGFBP5	1
GO:0010976	positive regulation of neuron projection development	1/30	265/17913	0.360771	0.395408	0.250715	APOE	1
GO:0043270	positive regulation of ion transport	1/30	266/17913	0.361858	0.396172	0.251199	APOE	1
GO:0016236	macroautophagy	1/30	272/17913	0.36834	0.402401	0.255149	DCN	1
GO:0051348	negative regulation of transferase activity	1/30	272/17913	0.36834	0.402401	0.255149	APOE	1
GO:1990778	protein localization to cell periphery	1/30	276/17913	0.372626	0.406647	0.257841	GAS6	1
GO:0042063	gliogenesis	1/30	285/17913	0.382167	0.416612	0.264159	MXRA8	1
GO:0050890	cognition	1/30	286/17913	0.383219	0.41731	0.264602	APOE	1
GO:0001818	negative regulation of cytokine production	1/30	290/17913	0.387407	0.42142	0.267208	GAS6	1
GO:0015849	organic acid transport	1/30	293/17913	0.390531	0.423457	0.2685	APOE	1
GO:0046942	carboxylic acid transport	1/30	293/17913	0.390531	0.423457	0.2685	APOE	1
GO:0070588	calcium ion transmembrane transport	1/30	293/17913	0.390531	0.423457	0.2685	GAS6	1
GO:0043010	camera-type eye development	1/30	295/17913	0.392604	0.424799	0.26935	FBN1	1
GO:1903037	regulation of leukocyte cell-cell adhesion	1/30	295/17913	0.392604	0.424799	0.26935	LGALS1	1
GO:0071375	cellular response to peptide hormone stimulus	1/30	297/17913	0.394671	0.426581	0.27048	FBN1	1
GO:0006913	nucleocytoplasmic transport	1/30	302/17913	0.399809	0.431674	0.27371	GAS6	1
GO:0032147	activation of protein kinase activity	1/30	303/17913	0.400831	0.432319	0.274119	GAS6	1
GO:0048193	Golgi vesicle transport	1/30	304/17913	0.401852	0.43296	0.274525	GAS6	1
GO:0051169	nuclear transport	1/30	305/17913	0.402871	0.433598	0.27493	GAS6	1
GO:0050863	regulation of T cell activation	1/30	307/17913	0.404904	0.435325	0.276025	LGALS1	1
GO:0071214	cellular response to abiotic stimulus	1/30	310/17913	0.407941	0.437664	0.277508	COL1A1	1
GO:0104004	cellular response to environmental stimulus	1/30	310/17913	0.407941	0.437664	0.277508	COL1A1	1
GO:0060562	epithelial tube morphogenesis	1/30	313/17913	0.410963	0.439514	0.278681	TNC	1
GO:1901214	regulation of neuron death	1/30	313/17913	0.410963	0.439514	0.278681	APOE	1
GO:1902903	regulation of supramolecular fiber organization	1/30	313/17913	0.410963	0.439514	0.278681	APOE	1
GO:0010506	regulation of autophagy	1/30	314/17913	0.411967	0.440125	0.279068	DCN	1
GO:0032103	positive regulation of response to external stimulus	1/30	315/17913	0.41297	0.44027	0.27916	GAS6	1
GO:0032535	regulation of cellular component size	1/30	315/17913	0.41297	0.44027	0.27916	APOE	1
GO:1903829	positive regulation of cellular protein localization	1/30	318/17913	0.415967	0.443	0.280891	GAS6	1
GO:0043405	regulation of MAP kinase activity	1/30	322/17913	0.41994	0.446764	0.283277	APOE	1
GO:0048638	regulation of developmental growth	1/30	325/17913	0.422903	0.449445	0.284978	APOE	1
GO:0007159	leukocyte cell-cell adhesion	1/30	328/17913	0.425851	0.452105	0.286664	LGALS1	1
GO:0006869	lipid transport	1/30	332/17913	0.429759	0.455778	0.288993	APOE	1
GO:0010038	response to metal ion	1/30	335/17913	0.432674	0.458391	0.29065	SPARC	1
GO:0006066	alcohol metabolic process	1/30	339/17913	0.436537	0.462002	0.292939	APOE	1
GO:0032102	negative regulation of response to external stimulus	1/30	343/17913	0.440375	0.465579	0.295207	APOE	1
GO:0051260	protein homooligomerization	1/30	345/17913	0.442285	0.467111	0.296179	APOE	1
GO:0018108	peptidyl-tyrosine phosphorylation	1/30	346/17913	0.443237	0.467631	0.296509	GAS6	1
GO:0070997	neuron death	1/30	347/17913	0.444188	0.468148	0.296837	APOE	1
GO:0018212	peptidyl-tyrosine modification	1/30	349/17913	0.446085	0.46966	0.297795	GAS6	1
GO:0045666	positive regulation of neuron differentiation	1/30	355/17913	0.451738	0.47512	0.301257	APOE	1
GO:0042692	muscle cell differentiation	1/30	359/17913	0.455476	0.478556	0.303436	IGFBP5	1
GO:0019932	second-messenger-mediated signaling	1/30	360/17913	0.456406	0.479038	0.303742	APOE	1
GO:0031346	positive regulation of cell projection organization	1/30	362/17913	0.458263	0.479995	0.304348	APOE	1
GO:0035690	cellular response to drug	1/30	362/17913	0.458263	0.479995	0.304348	GAS6	1
GO:1901653	cellular response to peptide	1/30	364/17913	0.460114	0.481437	0.305263	FBN1	1
GO:0010876	lipid localization	1/30	366/17913	0.461958	0.48287	0.306171	APOE	1
GO:0051098	regulation of binding	1/30	368/17913	0.463796	0.484293	0.307073	APOE	1
GO:0030900	forebrain development	1/30	371/17913	0.466542	0.48666	0.308574	COL3A1	1
GO:0042391	regulation of membrane potential	1/30	374/17913	0.469275	0.489008	0.310063	DCN	1
GO:0006874	cellular calcium ion homeostasis	1/30	375/17913	0.470182	0.489452	0.310345	APOE	1
GO:0010498	proteasomal protein catabolic process	1/30	382/17913	0.476495	0.495516	0.314189	APOE	1
GO:0046486	glycerolipid metabolic process	1/30	385/17913	0.479178	0.497796	0.315636	APOE	1
GO:0045785	positive regulation of cell adhesion	1/30	388/17913	0.481848	0.499449	0.316683	LGALS1	1
GO:0055074	calcium ion homeostasis	1/30	388/17913	0.481848	0.499449	0.316683	APOE	1
GO:0022407	regulation of cell-cell adhesion	1/30	389/17913	0.482735	0.499449	0.316683	LGALS1	1
GO:0070482	response to oxygen levels	1/30	389/17913	0.482735	0.499449	0.316683	COL1A1	1
GO:0072503	cellular divalent inorganic cation homeostasis	1/30	392/17913	0.485387	0.501572	0.31803	APOE	1
GO:0007409	axonogenesis	1/30	393/17913	0.486268	0.501572	0.31803	APOE	1
GO:0050804	modulation of chemical synaptic transmission	1/30	393/17913	0.486268	0.501572	0.31803	APOE	1
GO:0099177	regulation of trans-synaptic signaling	1/30	394/17913	0.487148	0.50197	0.318282	APOE	1
GO:0048285	organelle fission	1/30	395/17913	0.488026	0.502365	0.318532	DCN	1
GO:0006417	regulation of translation	1/30	397/17913	0.489778	0.503149	0.31903	IGFBP5	1
GO:2001233	regulation of apoptotic signaling pathway	1/30	397/17913	0.489778	0.503149	0.31903	TIMP3	1
GO:0032386	regulation of intracellular transport	1/30	400/17913	0.492395	0.505327	0.32041	GAS6	1
GO:0051222	positive regulation of protein transport	1/30	403/17913	0.495	0.507487	0.32178	GAS6	1
GO:0043254	regulation of protein complex assembly	1/30	409/17913	0.50017	0.51227	0.324813	APOE	1
GO:0030099	myeloid cell differentiation	1/30	411/17913	0.501882	0.513506	0.325597	FBN1	1
GO:0072507	divalent inorganic cation homeostasis	1/30	412/17913	0.502735	0.513862	0.325822	APOE	1
GO:0006816	calcium ion transport	1/30	415/17913	0.505288	0.515953	0.327148	GAS6	1
GO:0051090	regulation of DNA-binding transcription factor activity	1/30	429/17913	0.517036	0.527418	0.334417	GAS6	1
GO:0015711	organic anion transport	1/30	430/17913	0.517864	0.527733	0.334618	APOE	1
GO:0009314	response to radiation	1/30	435/17913	0.521987	0.531402	0.336944	COL3A1	1
GO:0045088	regulation of innate immune response	1/30	440/17913	0.526076	0.534493	0.338904	APOE	1
GO:1904951	positive regulation of establishment of protein localization	1/30	440/17913	0.526076	0.534493	0.338904	GAS6	1
GO:0090066	regulation of anatomical structure size	1/30	442/17913	0.527702	0.53561	0.339612	APOE	1
GO:0042110	T cell activation	1/30	443/17913	0.528513	0.535898	0.339794	LGALS1	1
GO:0001819	positive regulation of cytokine production	1/30	446/17913	0.530938	0.53782	0.341013	LUM	1
GO:0003012	muscle system process	1/30	448/17913	0.532548	0.538913	0.341706	IGFBP5	1
GO:0008544	epidermis development	1/30	452/17913	0.535752	0.541616	0.34342	IGFBP5	1
GO:0070838	divalent metal ion transport	1/30	454/17913	0.537346	0.542687	0.344099	GAS6	1
GO:0050769	positive regulation of neurogenesis	1/30	455/17913	0.538141	0.54295	0.344266	APOE	1
GO:0072511	divalent inorganic cation transport	1/30	458/17913	0.540518	0.544808	0.345444	GAS6	1
GO:0007005	mitochondrion organization	1/30	466/17913	0.546799	0.550592	0.349112	DCN	1
GO:0006914	autophagy	1/30	471/17913	0.550682	0.553406	0.350895	DCN	1
GO:0061919	process utilizing autophagic mechanism	1/30	471/17913	0.550682	0.553406	0.350895	DCN	1
GO:0050727	regulation of inflammatory response	1/30	479/17913	0.556829	0.558478	0.354112	APOE	1
GO:0071900	regulation of protein serine/threonine kinase activity	1/30	479/17913	0.556829	0.558478	0.354112	APOE	1
GO:0022411	cellular component disassembly	1/30	492/17913	0.566644	0.567762	0.359998	TIMP1	1
GO:0048667	cell morphogenesis involved in neuron differentiation	1/30	500/17913	0.57258	0.57258	0.363053	APOE	1
GO:1901615	organic hydroxy compound metabolic process	1/30	500/17913	0.57258	0.57258	0.363053	APOE	1
