# Supplementary material for: Single-cell RNA sequencing of human femoral head in vivo
Source: Aging (Albany NY). 2021 Jun 10;13(11):15595–619. doi: 10.18632/aging.203124 (PMC8221309; doi:10.18632/aging.203124)
Supplement: Supplementary Table 8 [file aging-13-203124-s009.xlsx]

## Sheet: Sheet1
Supplementary Table 8. GO enrichment analyses of each monocytes subtype.
ID	Description	GeneRatio	BgRatio	pvalue	p.adjust	qvalue	geneID	Count	Subtype
GO:0002446	neutrophil mediated immunity	78/399	499/17913	1.05e-43	4.66e-40	3.3e-40	FCN1/CD44/SERPINA1/CTSS/SLC2A3/SLC11A1/ITGAX/C5AR1/PLAUR/FPR1/CD55/PTPRC/TNFRSF1B/ANPEP/CFP/OLR1/S100A12/COTL1/ITGB2/S100A11/LILRB2/FGR/LILRB3/FCER1G/CD93/ALOX5/SELL/CTSH/S100A9/CYBB/GLIPR1/TLR2/CD14/FTH1/CPPED1/ITGAM/FGL2/CD53/B4GALT1/ADAM8/OSCAR/PNP/MNDA/YPEL5/S100A8/CKAP4/LTA4H/ATP6AP2/TCIRG1/CLEC12A/NFKB1/BIN2/RAB31/LPCAT1/QPCT/BST1/GPR84/ANXA2/GCA/ADA2/TOM1/NFAM1/PTX3/DIAPH1/ADAM17/QSOX1/MCE…	78	M1
GO:0042119	neutrophil activation	77/399	499/17913	1.03e-42	1.82e-39	1.29e-39	FCN1/CD44/SERPINA1/CTSS/SLC2A3/SLC11A1/ITGAX/C5AR1/PLAUR/FPR1/CD55/PTPRC/TNFRSF1B/ANPEP/CFP/OLR1/S100A12/COTL1/ITGB2/S100A11/LILRB2/FGR/LILRB3/FCER1G/CD93/ALOX5/CXCL8/SELL/CTSH/S100A9/CYBB/GLIPR1/TLR2/CD14/FTH1/CPPED1/ITGAM/FGL2/CD53/B4GALT1/ADAM8/OSCAR/PNP/MNDA/YPEL5/S100A8/CKAP4/LTA4H/ATP6AP2/TCIRG1/CLEC12A/NFKB1/BIN2/RAB31/LPCAT1/QPCT/BST1/GPR84/ANXA2/GCA/ADA2/TOM1/NFAM1/PTX3/DIAPH1/QSOX1/MCEM…	77	M1
GO:0043312	neutrophil degranulation	76/399	485/17913	1.23e-42	1.82e-39	1.29e-39	FCN1/CD44/SERPINA1/CTSS/SLC2A3/SLC11A1/ITGAX/C5AR1/PLAUR/FPR1/CD55/PTPRC/TNFRSF1B/ANPEP/CFP/OLR1/S100A12/COTL1/ITGB2/S100A11/LILRB2/FGR/LILRB3/FCER1G/CD93/ALOX5/SELL/CTSH/S100A9/CYBB/GLIPR1/TLR2/CD14/FTH1/CPPED1/ITGAM/FGL2/CD53/B4GALT1/ADAM8/OSCAR/PNP/MNDA/YPEL5/S100A8/CKAP4/LTA4H/ATP6AP2/TCIRG1/CLEC12A/NFKB1/BIN2/RAB31/LPCAT1/QPCT/BST1/GPR84/ANXA2/GCA/ADA2/TOM1/NFAM1/PTX3/DIAPH1/QSOX1/MCEMP1/IQG…	76	M1
GO:0002283	neutrophil activation involved in immune response	76/399	488/17913	1.94e-42	2.15e-39	1.53e-39	FCN1/CD44/SERPINA1/CTSS/SLC2A3/SLC11A1/ITGAX/C5AR1/PLAUR/FPR1/CD55/PTPRC/TNFRSF1B/ANPEP/CFP/OLR1/S100A12/COTL1/ITGB2/S100A11/LILRB2/FGR/LILRB3/FCER1G/CD93/ALOX5/SELL/CTSH/S100A9/CYBB/GLIPR1/TLR2/CD14/FTH1/CPPED1/ITGAM/FGL2/CD53/B4GALT1/ADAM8/OSCAR/PNP/MNDA/YPEL5/S100A8/CKAP4/LTA4H/ATP6AP2/TCIRG1/CLEC12A/NFKB1/BIN2/RAB31/LPCAT1/QPCT/BST1/GPR84/ANXA2/GCA/ADA2/TOM1/NFAM1/PTX3/DIAPH1/QSOX1/MCEMP1/IQG…	76	M1
GO:0001819	positive regulation of cytokine production	51/399	446/17913	4.09e-22	3.64e-19	2.58e-19	FCN1/SLC11A1/C5AR1/PTPRC/PTGS2/NLRP3/IL1B/EREG/LILRB2/SULF2/LILRA5/FGR/FCER1G/PDE4B/CASP1/MYD88/CTNNB1/GPSM3/CYBB/RIPK2/THBS1/TLR2/CYP1B1/CD14/TGFB1/LRRK2/CLEC4E/ADAM8/AKIRIN2/SELENOK/RARA/HIF1A/NFKB2/LRRFIP1/ATP6AP2/CD86/NFKB1/MALT1/OSM/CEBPB/IL1A/DDX21/STAT3/BIRC3/NFAM1/IL6R/ADAM17/FFAR2/SASH3/CLEC5A/IL6	51	M1
GO:0050900	leukocyte migration	51/399	467/17913	3.25e-21	2.41e-18	1.71e-18	CD44/JAML/ITGAX/C5AR1/CD48/TREM1/OLR1/S100A12/ITGB2/VEGFA/FCER1G/CXCL8/SELL/CSF3R/CORO1A/DUSP1/OXSR1/SLC7A7/PDE4B/S100A9/GPSM3/THBS1/TGFB1/MSN/SLC7A5/ITGAM/B4GALT1/ADAM8/CCL20/ADGRE2/SELENOK/RIPOR2/S100A8/MYO1G/LYN/ITGB1/FYN/BST1/MYH9/TNFRSF10B/DOCK8/SLC16A3/ATP1B3/IL6R/ADAM17/ITGA5/THBD/FPR2/FFAR2/CXCL3/IL6	51	M1
GO:0042110	T cell activation	44/399	443/17913	7.68e-17	3.8e-14	2.69e-14	CD44/SLC11A1/JAML/CD55/PTPRC/TNFRSF1B/NLRP3/IL1B/CLEC7A/LILRB2/MAP3K8/CLEC4A/CORO1A/CTNNB1/RIPK2/MAFB/TGFB1/MSN/CLEC4E/FGL2/NFKBIZ/ADAM8/PNP/SELENOK/RIPOR2/RARA/LYN/VSIR/CD86/TCIRG1/MALT1/CEBPB/FYN/STAT3/MYH9/DOCK8/ZC3H12A/LCP1/ADAM17/JMJD6/CD1C/SASH3/RAB27A/IL6	44	M1
GO:0002694	regulation of leukocyte activation	43/399	492/17913	1.73e-14	5.13e-12	3.64e-12	SAMSN1/C5AR1/CD55/PTPRC/TNFRSF1B/NLRP3/IL1B/ITGB2/LILRB2/FGR/MAP3K8/FCER1G/CORO1A/CTNNB1/RIPK2/LST1/THBS1/TGFB1/LRRK2/CDKN1A/ITGAM/NFKBIZ/ADAM8/PNP/ADGRE2/TNFAIP3/MNDA/SELENOK/RIPOR2/RARA/LYN/VSIR/CD86/MALT1/CEBPB/FYN/DOCK8/NFAM1/ZC3H12A/STXBP2/SASH3/INHBA/IL6	43	M1
GO:0002521	leukocyte differentiation	39/399	485/17913	4.22e-12	9.86e-10	6.99e-10	PTPRC/NLRP3/LILRB2/VEGFA/LILRB3/FCER1G/EVI2B/CTNNB1/RIPK2/MAFB/TLR2/TGFB1/CLEC4E/NFKBIZ/ADAM8/OSCAR/PNP/RARA/LYN/POU2F2/VSIR/ITGB1/CD86/TCIRG1/MALT1/CEBPB/DOCK10/STAT3/MYH9/ANXA2/NFAM1/ZC3H12A/TRIB1/JUNB/ADAM17/JMJD6/SASH3/INHBA/IL6	39	M1
GO:0002237	response to molecule of bacterial origin	38/399	309/17913	9.13e-18	5.8e-15	4.11e-15	SLC11A1/C5AR1/CD55/PTGS2/TNFRSF1B/NLRP3/IL1B/LILRB2/CXCL8/CARD16/PDE4B/CASP1/GCH1/CXCL2/RIPK2/NFKBIA/TLR2/CD14/TGFB1/TNFAIP3/AKIRIN2/TSPO/LITAF/S100A8/RARA/LYN/NFKB2/VIM/NFKB1/MALT1/CEBPB/CAPN2/ZC3H12A/TRIB1/ADAM17/THBD/ADM/IL6	38	M1
GO:0050727	regulation of inflammatory response	38/399	479/17913	1.21e-11	2.45e-09	1.73e-09	NEAT1/C5AR1/CD55/PTPRC/PTGS2/TNFRSF1B/NLRP3/CFP/IL1B/S100A12/ITGB2/LILRA5/FCER1G/METRNL/S100A9/MYD88/GPSM3/NFKBIA/SOCS3/TLR2/LRRK2/ITGAM/NFKBIZ/ADAM8/TNFAIP3/S100A8/LYN/NFKB1/OSM/CEBPB/BST1/BIRC3/IL1R2/ZC3H12A/FPR2/FFAR2/TNFAIP6/IL6	38	M1
GO:0032496	response to lipopolysaccharide	37/399	295/17913	1.3e-17	7.24e-15	5.13e-15	SLC11A1/C5AR1/CD55/PTGS2/TNFRSF1B/NLRP3/IL1B/LILRB2/CXCL8/CARD16/PDE4B/CASP1/GCH1/RIPK2/NFKBIA/TLR2/CD14/TGFB1/TNFAIP3/AKIRIN2/TSPO/LITAF/S100A8/RARA/LYN/NFKB2/VIM/NFKB1/MALT1/CEBPB/CAPN2/ZC3H12A/TRIB1/ADAM17/THBD/ADM/IL6	37	M1
GO:0007159	leukocyte cell-cell adhesion	36/399	328/17913	2.63e-15	1.06e-12	7.52e-13	CD44/CD55/PTPRC/NLRP3/IL1B/ITGB2/LILRB2/MAP3K8/SELL/CORO1A/S100A9/RIPK2/TGFB1/MSN/NFKBIZ/ADAM8/PNP/SELENOK/EZR/RIPOR2/S100A8/RARA/LYN/VSIR/ITGB1/CD86/MALT1/CEBPB/FERMT3/FYN/DOCK8/ZC3H12A/NFAT5/ITGA5/SASH3/IL6	36	M1
GO:0032103	positive regulation of response to external stimulus	35/399	315/17913	4.48e-15	1.66e-12	1.18e-12	NEAT1/C5AR1/PTGS2/IL1B/S100A12/ITGB2/VEGFA/LILRA5/FCER1G/CXCL8/OXSR1/S100A9/MYD88/GPSM3/RIPK2/NFKBIA/THBS1/TLR2/TGFB1/LRRK2/ITGAM/NFKBIZ/ADAM8/NDEL1/RIPOR2/S100A8/OSM/CEBPB/IL6R/ADAM17/THBD/FPR2/FFAR2/F3/IL6	35	M1
GO:0045785	positive regulation of cell adhesion	34/399	388/17913	1.03e-11	2.19e-09	1.55e-09	CD44/CD55/PTPRC/NLRP3/IL1B/ITGB2/LILRB2/VEGFA/MAP3K8/FLNA/S100A10/LIMS1/CORO1A/RIPK2/TGFB1/NFKBIZ/ADAM8/PNP/SELENOK/RARA/LYN/VSIR/CD86/MALT1/FYN/MYADM/NEDD9/DOCK8/MAP4K4/NFAT5/ITGA5/IQGAP1/SASH3/IL6	34	M1
GO:0051249	regulation of lymphocyte activation	34/399	401/17913	2.56e-11	4.55e-09	3.23e-09	SAMSN1/CD55/PTPRC/TNFRSF1B/NLRP3/IL1B/LILRB2/MAP3K8/CORO1A/CTNNB1/RIPK2/LST1/TGFB1/CDKN1A/NFKBIZ/ADAM8/PNP/TNFAIP3/MNDA/SELENOK/RIPOR2/RARA/LYN/VSIR/CD86/MALT1/CEBPB/FYN/DOCK8/NFAM1/ZC3H12A/SASH3/INHBA/IL6	34	M1
GO:0045088	regulation of innate immune response	33/399	440/17913	1.23e-09	1.33e-07	9.42e-08	FCN1/CTSS/CLEC7A/ITGB2/EREG/FGR/FCER1G/SERPINB9/CLEC4A/S100A9/MYD88/RIPK2/NFKBIA/SOCS3/TLR2/CD14/CLEC4E/IFNGR2/ITGAM/ADAM8/ICAM3/TNFAIP3/MNDA/S100A8/LYN/NFKB1/MALT1/IFNGR1/FYN/BIRC3/FPR2/FFAR2/CLEC10A	33	M1
GO:1903706	regulation of hemopoiesis	33/399	468/17913	5.73e-09	4.9e-07	3.47e-07	PTPRC/NLRP3/LILRB2/LILRB3/EVI2B/CSF3R/CTNNB1/RIPK2/NFKBIA/MAFB/THBS1/TGFB1/FOXO3/NFKBIZ/ADAM8/PNP/H3F3A/RARA/HIF1A/LYN/VSIR/CD86/MALT1/OSM/CEBPB/STAT3/PURB/NFAM1/PRKCB/ZC3H12A/TRIB1/SASH3/INHBA	33	M1
GO:0098542	defense response to other organism	33/399	481/17913	1.12e-08	8.18e-07	5.79e-07	SLC11A1/C5AR1/PTPRC/NLRP3/CFP/IL1B/CLEC7A/S100A12/COTL1/FGR/FLNA/S100A9/MYD88/RIPK2/TLR2/TGFB1/CLEC4E/MPEG1/FGL2/CCL20/TNFAIP3/SELENOK/S100A8/CEBPB/DDX21/APOBEC3A/BIRC3/ZC3H12A/IL6R/ADAM17/FPR2/HP/IL6	33	M1
GO:0002791	regulation of peptide secretion	32/399	483/17913	4.28e-08	2.19e-06	1.55e-06	FCN1/TNFRSF1B/NLRP3/IL1B/LILRA5/FGR/CARD16/CASP1/RIPK2/TLR2/CD14/TGFB1/LRRK2/CLEC4E/PIM3/ADAM8/TNFAIP3/SELENOK/EZR/S100A8/HIF1A/LYN/TCIRG1/OSM/IL1A/IL1R2/MAP4K4/ZC3H12A/FFAR2/HCAR2/CLEC5A/IL6	32	M1
GO:0050867	positive regulation of cell activation	31/399	319/17913	6.19e-12	1.38e-09	9.75e-10	CD55/PTPRC/NLRP3/IL1B/ITGB2/LILRB2/LILRA5/FGR/MAP3K8/FCER1G/CORO1A/RIPK2/THBS1/TGFB1/LRRK2/CDKN1A/ITGAM/NFKBIZ/ADAM8/PNP/SELENOK/RARA/LYN/VSIR/CD86/MALT1/PLEK/FYN/DOCK8/SASH3/IL6	31	M1
GO:0022407	regulation of cell-cell adhesion	31/399	389/17913	9.24e-10	1.03e-07	7.27e-08	CD44/CD55/PTPRC/NLRP3/IL1B/ITGB2/LILRB2/MAP3K8/CORO1A/RIPK2/TGFB1/NFKBIZ/ADAM8/PNP/IL1RN/SELENOK/RIPOR2/RARA/LYN/VSIR/CD86/MALT1/CEBPB/FERMT3/FYN/MYADM/DOCK8/ZC3H12A/NFAT5/SASH3/IL6	31	M1
GO:1904951	positive regulation of establishment of protein localization	31/399	440/17913	1.72e-08	1.14e-06	8.1e-07	FCN1/PTGS2/NLRP3/IL1B/ITGB2/LILRA5/FGR/FLNA/CASP1/RIPK2/TLR2/CD14/TGFB1/LRRK2/CLEC4E/BID/ITGAM/ADAM8/SELENOK/EZR/HIF1A/PLK3/OSM/IL1A/FYN/ZC3H12A/ACSL3/FFAR2/HCAR2/CLEC5A/IL6	31	M1
GO:0050708	regulation of protein secretion	31/399	456/17913	3.91e-08	2.09e-06	1.48e-06	FCN1/TNFRSF1B/NLRP3/IL1B/LILRA5/FGR/CARD16/CASP1/RIPK2/TLR2/CD14/TGFB1/LRRK2/CLEC4E/PIM3/ADAM8/TNFAIP3/SELENOK/EZR/HIF1A/LYN/TCIRG1/OSM/IL1A/IL1R2/MAP4K4/ZC3H12A/FFAR2/HCAR2/CLEC5A/IL6	31	M1
GO:0006909	phagocytosis	30/399	308/17913	1.3e-11	2.5e-09	1.77e-09	FCN1/SLC11A1/PTPRC/IL1B/CLEC7A/NCF2/ITGB2/FGR/FCER1G/CD93/CORO1A/MYD88/THBS1/TLR2/CD14/TGFB1/ITGAM/ICAM3/MYO1G/RARA/LYN/ITGB1/BIN2/FYN/RAB31/MYH9/PTX3/JMJD6/FPR2/RAB27A	30	M1
GO:0051222	positive regulation of protein transport	30/399	403/17913	8.49e-09	6.29e-07	4.45e-07	FCN1/PTGS2/NLRP3/IL1B/ITGB2/LILRA5/FGR/FLNA/CASP1/RIPK2/TLR2/CD14/TGFB1/LRRK2/CLEC4E/ITGAM/ADAM8/SELENOK/EZR/HIF1A/PLK3/OSM/IL1A/FYN/ZC3H12A/ACSL3/FFAR2/HCAR2/CLEC5A/IL6	30	M1
GO:0030099	myeloid cell differentiation	30/399	411/17913	1.33e-08	9.13e-07	6.47e-07	VEGFA/LILRB3/FCER1G/EVI2B/CSF3R/CTNNB1/NFKBIA/MAFB/THBS1/TLR2/TGFB1/FOXO3/TET2/OSCAR/H3F3A/RARA/HIF1A/LYN/TCIRG1/CEBPB/STAT3/PURB/MYH9/ANXA2/PRKCB/TRIB1/JUNB/JMJD6/CLEC5A/INHBA	30	M1
GO:0002697	regulation of immune effector process	30/399	441/17913	6.44e-08	3.01e-06	2.13e-06	C5AR1/CD55/PTPRC/TNFRSF1B/NLRP3/CFP/IL1B/ITGB2/FGR/FCER1G/SERPINB9/RIPK2/TGFB1/ITGAM/FGL2/NFKBIZ/ADGRE2/TNFAIP3/SELENOK/RARA/LYN/CD86/MALT1/DDX21/BIRC3/ZC3H12A/FFAR2/STXBP2/SASH3/IL6	30	M1
GO:0060627	regulation of vesicle-mediated transport	30/399	480/17913	4.02e-07	1.55e-05	1.1e-05	SLC11A1/PTPRC/IL1B/ITGB2/VEGFA/EHD1/FGR/FCER1G/CORO1A/TLR2/CD14/TGFB1/MSN/LRRK2/ITGAM/ADGRE2/EZR/LYN/NUMB/RAB31/ANXA2/GRASP/PRKCB/PTX3/ACSL3/INSIG1/FPR2/EHD4/STXBP2/RAB27A	30	M1
GO:1901652	response to peptide	30/399	491/17913	6.47e-07	2.23e-05	1.58e-05	TIMP1/NAMPT/ATP2B1/PTGS2/IL1B/EREG/PTPRE/CYBB/RIPK2/NFKBIA/SYAP1/TLR2/TGFB1/FOXO3/TNFAIP3/NDEL1/LYN/AREG/VIM/TCIRG1/NFKB1/FYN/RAB31/ATP6V0D1/STAT3/ATP6V1B2/PRKCB/IQGAP1/FPR2/ADM	30	M1
GO:0009636	response to toxic substance	30/399	499/17913	9.06e-07	2.94e-05	2.08e-05	PTGS2/SOD2/PPIF/KDM6B/DUSP1/S100A9/CYBB/GCH1/TLR2/CYP1B1/CD14/LRRK2/FOXO3/CDKN1A/TNFAIP3/S100A8/RARA/LYN/AREG/NFKB1/FYN/PPP1R15B/STAT3/CAPN2/RANBP2/ZC3H12A/ALOX5AP/HP/CES1/IL6	30	M1
GO:0060326	cell chemotaxis	29/399	253/17913	4.91e-13	1.36e-10	9.66e-11	JAML/C5AR1/S100A12/ITGB2/VEGFA/HBEGF/CXCL8/CSF3R/CORO1A/DUSP1/OXSR1/PDE4B/S100A9/GPSM3/THBS1/ADAM8/CCL20/ADGRE2/RIPOR2/S100A8/LYN/BIN2/BST1/IL6R/ADAM17/FPR2/FFAR2/CXCL3/IL6	29	M1
GO:0002696	positive regulation of leukocyte activation	29/399	305/17913	5.17e-11	8.51e-09	6.03e-09	CD55/PTPRC/NLRP3/IL1B/ITGB2/LILRB2/FGR/MAP3K8/FCER1G/CORO1A/RIPK2/THBS1/TGFB1/LRRK2/CDKN1A/ITGAM/NFKBIZ/ADAM8/PNP/SELENOK/RARA/LYN/VSIR/CD86/MALT1/FYN/DOCK8/SASH3/IL6	29	M1
GO:0051047	positive regulation of secretion	29/399	409/17913	4.41e-08	2.23e-06	1.58e-06	FCN1/NLRP3/IL1B/ITGB2/LILRA5/FGR/FCER1G/CASP1/RIPK2/TLR2/CD14/TGFB1/LRRK2/CLEC4E/ITGAM/ADAM8/SELENOK/EZR/S100A8/HIF1A/OSM/IL1A/ACSL3/FFAR2/HCAR2/CLEC5A/RAB27A/INHBA/IL6	29	M1
GO:1901342	regulation of vasculature development	29/399	425/17913	1.01e-07	4.39e-06	3.11e-06	ITGAX/C5AR1/BTG1/PTGS2/SOD2/IL1B/ITGB2/VEGFA/CXCL8/CTSH/CTNNB1/CYBB/THBS1/CYP1B1/TNFAIP3/WARS/HIF1A/ITGB1/IL1A/STAT3/PRKCB/ZC3H12A/IL6R/AGO2/ITGA5/HK2/ADM/F3/IL6	29	M1
GO:0071216	cellular response to biotic stimulus	28/399	206/17913	1.69e-14	5.13e-12	3.64e-12	CD55/TNFRSF1B/NLRP3/IL1B/LILRB2/CXCL8/CARD16/PDE4B/CASP1/RIPK2/NFKBIA/TLR2/CD14/TGFB1/TNFAIP3/TSPO/LITAF/RARA/LYN/VIM/NFKB1/MALT1/CEBPB/PPP1R15B/CAPN2/ZC3H12A/TRIB1/IL6	28	M1
GO:1903037	regulation of leukocyte cell-cell adhesion	28/399	295/17913	1.17e-10	1.73e-08	1.23e-08	CD44/CD55/PTPRC/NLRP3/IL1B/ITGB2/LILRB2/MAP3K8/CORO1A/RIPK2/TGFB1/NFKBIZ/ADAM8/PNP/SELENOK/RIPOR2/RARA/LYN/VSIR/CD86/MALT1/CEBPB/FYN/DOCK8/ZC3H12A/NFAT5/SASH3/IL6	28	M1
GO:0045089	positive regulation of innate immune response	28/399	373/17913	2.26e-08	1.38e-06	9.75e-07	FCN1/CTSS/CLEC7A/ITGB2/EREG/FCER1G/CLEC4A/S100A9/MYD88/RIPK2/NFKBIA/TLR2/CD14/CLEC4E/ITGAM/ADAM8/ICAM3/TNFAIP3/MNDA/S100A8/LYN/NFKB1/MALT1/FYN/BIRC3/FPR2/FFAR2/CLEC10A	28	M1
GO:0051090	regulation of DNA-binding transcription factor activity	28/399	429/17913	4.16e-07	1.6e-05	1.13e-05	NLRP3/IL1B/S100A12/ITGB2/VEGFA/FLNA/CARD16/S100A9/MYD88/CTNNB1/RIPK2/NFKBIA/TLR2/CYP1B1/TGFB1/ADAM8/TNFAIP3/S100A8/NFKB2/LRRFIP1/NFKB1/MALT1/STAT3/NFAM1/PRKCB/ZC3H12A/TRIB1/IL6	28	M1
GO:0002768	immune response-regulating cell surface receptor signaling pathway	28/399	434/17913	5.26e-07	1.96e-05	1.39e-05	FCN1/C5AR1/PTPRC/LILRB2/FGR/FCER1G/CLEC4A/PDE4B/RIPK2/CLEC4E/LCP2/NFKBIZ/ICAM3/FYB1/MNDA/EZR/MYO1G/LYN/NFKB1/MALT1/FYN/NFAM1/PRKCB/ZC3H12A/FPR2/FFAR2/CLEC10A/FCER1A	28	M1
GO:0071900	regulation of protein serine/threonine kinase activity	28/399	479/17913	3.62e-06	9.23e-05	6.54e-05	C5AR1/FPR1/PTPRC/IL1B/S100A12/VEGFA/ACSL1/MAP3K8/DUSP1/RIPK2/THBS1/SYAP1/MAP3K2/TGFB1/LRRK2/CDKN1A/ADAM8/AKAP13/TNFAIP3/LYN/DUSP6/ZEB2/PRKAG2/TRIB1/ADAM17/MAP2K3/IQGAP1/PROK2	28	M1
GO:0043410	positive regulation of MAPK cascade	28/399	499/17913	7.82e-06	0.000176415	0.000124998	CD44/C5AR1/FPR1/PTPRC/IL1B/S100A12/VEGFA/LILRA5/MAP3K8/CTNNB1/RIPK2/THBS1/MAP3K2/TGFB1/LRRK2/ADAM8/AKAP13/DUSP6/NCF1/OSM/ZEB2/GLIPR2/ZC3H12A/MAP2K3/IQGAP1/FPR2/PROK2/IL6	28	M1
GO:0071222	cellular response to lipopolysaccharide	27/399	176/17913	2.36e-15	1.05e-12	7.44e-13	CD55/TNFRSF1B/NLRP3/IL1B/LILRB2/CXCL8/CARD16/PDE4B/CASP1/RIPK2/NFKBIA/TLR2/CD14/TGFB1/TNFAIP3/TSPO/LITAF/RARA/LYN/VIM/NFKB1/MALT1/CEBPB/CAPN2/ZC3H12A/TRIB1/IL6	27	M1
GO:0071219	cellular response to molecule of bacterial origin	27/399	183/17913	6.4e-15	2.19e-12	1.55e-12	CD55/TNFRSF1B/NLRP3/IL1B/LILRB2/CXCL8/CARD16/PDE4B/CASP1/RIPK2/NFKBIA/TLR2/CD14/TGFB1/TNFAIP3/TSPO/LITAF/RARA/LYN/VIM/NFKB1/MALT1/CEBPB/CAPN2/ZC3H12A/TRIB1/IL6	27	M1
GO:0050663	cytokine secretion	27/399	230/17913	1.81e-12	4.47e-10	3.17e-10	FCN1/TNFRSF1B/NLRP3/IL1B/S100A12/LILRA5/FGR/CARD16/CASP1/RIPK2/TLR2/CD14/LRRK2/CLEC4E/LCP2/PNP/TNFAIP3/SELENOK/EZR/LYN/TCIRG1/OSM/IL1A/IL1R2/ZC3H12A/FFAR2/CLEC5A	27	M1
GO:0072593	reactive oxygen species metabolic process	27/399	269/17913	7.13e-11	1.13e-08	8.02e-09	PTGS2/SOD2/IL1B/NCF2/ITGB2/CYBB/GCH1/THBS1/TLR2/CYP1B1/TGFB1/LRRK2/FOXO3/CDKN1A/ITGAM/TSPO/HIF1A/NCF1/FYN/STAT3/BST1/ZC3H12A/PTX3/HK2/FPR2/RAB27A/HP	27	M1
GO:0050863	regulation of T cell activation	27/399	307/17913	1.38e-09	1.43e-07	1.01e-07	CD55/PTPRC/TNFRSF1B/NLRP3/IL1B/LILRB2/MAP3K8/CORO1A/CTNNB1/RIPK2/TGFB1/NFKBIZ/ADAM8/PNP/SELENOK/RIPOR2/RARA/LYN/VSIR/CD86/MALT1/CEBPB/FYN/DOCK8/ZC3H12A/SASH3/IL6	27	M1
GO:0030098	lymphocyte differentiation	27/399	325/17913	4.77e-09	4.24e-07	3.01e-07	PTPRC/NLRP3/LILRB2/CTNNB1/RIPK2/MAFB/TGFB1/CLEC4E/NFKBIZ/ADAM8/PNP/RARA/POU2F2/VSIR/ITGB1/CD86/TCIRG1/MALT1/DOCK10/STAT3/NFAM1/ZC3H12A/ADAM17/JMJD6/SASH3/INHBA/IL6	27	M1
GO:0018108	peptidyl-tyrosine phosphorylation	27/399	346/17913	1.81e-08	1.18e-06	8.33e-07	CD44/SAMSN1/PTPRC/ITGB2/EREG/VEGFA/LILRA5/FGR/HBEGF/RIPK2/SOCS3/TGFB1/LYN/AREG/NCF1/OSM/FYN/STAT3/BST1/NEDD9/IL6R/ADAM17/ITGA5/MAP2K3/IQGAP1/EHD4/IL6	27	M1
GO:0018212	peptidyl-tyrosine modification	27/399	349/17913	2.17e-08	1.34e-06	9.48e-07	CD44/SAMSN1/PTPRC/ITGB2/EREG/VEGFA/LILRA5/FGR/HBEGF/RIPK2/SOCS3/TGFB1/LYN/AREG/NCF1/OSM/FYN/STAT3/BST1/NEDD9/IL6R/ADAM17/ITGA5/MAP2K3/IQGAP1/EHD4/IL6	27	M1
GO:1903532	positive regulation of secretion by cell	27/399	381/17913	1.32e-07	5.63e-06	3.99e-06	FCN1/NLRP3/IL1B/ITGB2/LILRA5/FGR/FCER1G/CASP1/RIPK2/TLR2/CD14/TGFB1/LRRK2/CLEC4E/ITGAM/ADAM8/SELENOK/EZR/HIF1A/OSM/IL1A/FFAR2/HCAR2/CLEC5A/RAB27A/INHBA/IL6	27	M1
GO:0045765	regulation of angiogenesis	27/399	383/17913	1.46e-07	6.14e-06	4.35e-06	ITGAX/C5AR1/BTG1/PTGS2/IL1B/ITGB2/VEGFA/CXCL8/CTSH/CTNNB1/CYBB/THBS1/CYP1B1/TNFAIP3/WARS/HIF1A/ITGB1/IL1A/STAT3/PRKCB/ZC3H12A/AGO2/ITGA5/HK2/ADM/F3/IL6	27	M1
GO:0002683	negative regulation of immune system process	27/399	451/17913	3.48e-06	9.15e-05	6.48e-05	SAMSN1/CD55/PTPRC/LILRB2/LILRB3/FCER1G/SERPINB9/DUSP1/CTNNB1/NFKBIA/MAFB/LST1/THBS1/CD14/TGFB1/FGL2/TNFAIP3/MNDA/EZR/RIPOR2/RARA/LYN/VSIR/CEBPB/ZC3H12A/TRIB1/INHBA	27	M1
GO:0050878	regulation of body fluid levels	27/399	499/17913	2.17e-05	0.000423036	0.000299739	SERPINA1/PLAUR/VEGFA/EHD1/FLNA/FCER1G/JMJD1C/THBS1/LCP2/H3F3A/HIF1A/LYN/F5/PLEK/FERMT3/FYN/MYH9/ANXA2/DOCK8/PRKCB/SERPINB2/HK2/THBD/ADM/RAB27A/F3/IL6	27	M1
GO:0070661	leukocyte proliferation	26/399	270/17913	4.02e-10	5.1e-08	3.61e-08	SLC11A1/CD55/PTPRC/TNFRSF1B/IL1B/LILRB2/CORO1A/CTNNB1/RIPK2/LST1/TGFB1/MSN/CDKN1A/PNP/TNFAIP3/MNDA/SELENOK/LYN/VSIR/TCIRG1/MALT1/CEBPB/FYN/DOCK8/SASH3/IL6	26	M1
GO:2001233	regulation of apoptotic signaling pathway	26/399	397/17913	1.02e-06	3.21e-05	2.28e-05	CD44/G0S2/PLAUR/PTPRC/PTGS2/SOD2/IL1B/PPIF/CTSH/MCL1/S100A9/CTNNB1/THBS1/LRRK2/BID/SKIL/IVNS1ABP/TNFAIP3/ITPRIP/S100A8/HIF1A/IL1A/FYN/TNFRSF10B/SNAI1/INHBA	26	M1
GO:0006979	response to oxidative stress	26/399	442/17913	7.25e-06	0.000167746	0.000118855	PTGS2/SOD2/NCF2/PPIF/KDM6B/DUSP1/OXSR1/MCL1/CTNNB1/CYBB/GCH1/CYP1B1/LRRK2/FOXO3/TNFAIP3/SELENOK/HIF1A/AREG/PLK3/NCF1/FYN/PPP1R15B/CAPN2/ZC3H12A/HP/IL6	26	M1
GO:0030595	leukocyte chemotaxis	25/399	188/17913	7.36e-13	1.92e-10	1.36e-10	JAML/C5AR1/S100A12/ITGB2/CXCL8/CSF3R/CORO1A/DUSP1/OXSR1/PDE4B/S100A9/GPSM3/THBS1/ADAM8/ADGRE2/RIPOR2/S100A8/LYN/BST1/IL6R/ADAM17/FPR2/FFAR2/CXCL3/IL6	25	M1
GO:1903039	positive regulation of leukocyte cell-cell adhesion	25/399	214/17913	1.36e-11	2.53e-09	1.79e-09	CD44/CD55/PTPRC/NLRP3/IL1B/ITGB2/LILRB2/MAP3K8/CORO1A/RIPK2/TGFB1/NFKBIZ/ADAM8/PNP/SELENOK/RARA/LYN/VSIR/CD86/MALT1/FYN/DOCK8/NFAT5/SASH3/IL6	25	M1
GO:1904018	positive regulation of vasculature development	25/399	232/17913	8.01e-11	1.23e-08	8.7e-09	ITGAX/C5AR1/BTG1/PTGS2/SOD2/IL1B/ITGB2/VEGFA/CXCL8/CTSH/CYBB/THBS1/CYP1B1/HIF1A/ITGB1/IL1A/STAT3/PRKCB/ZC3H12A/IL6R/AGO2/ITGA5/HK2/ADM/F3	25	M1
GO:0050730	regulation of peptidyl-tyrosine phosphorylation	25/399	245/17913	2.58e-10	3.38e-08	2.39e-08	CD44/SAMSN1/PTPRC/ITGB2/EREG/VEGFA/LILRA5/HBEGF/RIPK2/SOCS3/TGFB1/LYN/AREG/NCF1/OSM/FYN/STAT3/BST1/NEDD9/IL6R/ADAM17/ITGA5/IQGAP1/EHD4/IL6	25	M1
GO:0022409	positive regulation of cell-cell adhesion	25/399	251/17913	4.32e-10	5.34e-08	3.78e-08	CD44/CD55/PTPRC/NLRP3/IL1B/ITGB2/LILRB2/MAP3K8/CORO1A/RIPK2/TGFB1/NFKBIZ/ADAM8/PNP/SELENOK/RARA/LYN/VSIR/CD86/MALT1/FYN/DOCK8/NFAT5/SASH3/IL6	25	M1
GO:0002218	activation of innate immune response	25/399	319/17913	5.67e-08	2.74e-06	1.94e-06	FCN1/CTSS/CLEC7A/ITGB2/FCER1G/CLEC4A/S100A9/MYD88/RIPK2/NFKBIA/TLR2/CD14/CLEC4E/ITGAM/ICAM3/TNFAIP3/MNDA/S100A8/LYN/NFKB1/MALT1/FYN/BIRC3/FFAR2/CLEC10A	25	M1
GO:0052548	regulation of endopeptidase activity	25/399	370/17913	9.36e-07	3.02e-05	2.14e-05	CD44/TIMP1/PLAUR/PTGS2/NLRP3/VEGFA/SERPINB9/CARD16/CTSH/CASP1/S100A9/RIPK2/THBS1/APLP2/AKIRIN2/S100A8/LYN/VSIR/CAST/FYN/STAT3/BIRC3/TNFRSF10B/CSTA/F3	25	M1
GO:0043062	extracellular structure organization	25/399	387/17913	2.11e-06	6.06e-05	4.29e-05	CD44/TIMP1/CTSS/ITGAX/VCAN/TNFRSF1B/ITGB2/SULF2/THBS1/CYP1B1/TGFB1/ITGAM/B4GALT1/ADAM8/ICAM3/NFKB2/ITGB1/LAMB3/CAPN2/PTX3/ACSL3/LCP1/ITGA5/QSOX1/IL6	25	M1
GO:0052547	regulation of peptidase activity	25/399	398/17913	3.48e-06	9.15e-05	6.48e-05	CD44/TIMP1/PLAUR/PTGS2/NLRP3/VEGFA/SERPINB9/CARD16/CTSH/CASP1/S100A9/RIPK2/THBS1/APLP2/AKIRIN2/S100A8/LYN/VSIR/CAST/FYN/STAT3/BIRC3/TNFRSF10B/CSTA/F3	25	M1
GO:0002429	immune response-activating cell surface receptor signaling pathway	25/399	399/17913	3.64e-06	9.23e-05	6.54e-05	FCN1/C5AR1/PTPRC/FGR/FCER1G/CLEC4A/PDE4B/RIPK2/CLEC4E/LCP2/NFKBIZ/ICAM3/FYB1/MNDA/EZR/MYO1G/LYN/NFKB1/MALT1/FYN/NFAM1/PRKCB/ZC3H12A/FFAR2/CLEC10A	25	M1
GO:0002460	adaptive immune response based on somatic recombination of immune receptors built from immunoglobulin superfamily domains	24/399	295/17913	5.19e-08	2.54e-06	1.8e-06	SLC11A1/CD55/PTPRC/TNFRSF1B/NLRP3/IL1B/FCER1G/CTSH/RIPK2/TGFB1/FGL2/NFKBIZ/TNFAIP3/MYO1G/POU2F2/NFKB2/TCIRG1/MALT1/STAT3/ZC3H12A/ADAM17/SASH3/RAB27A/IL6	24	M1
GO:0002758	innate immune response-activating signal transduction	24/399	298/17913	6.29e-08	2.97e-06	2.11e-06	FCN1/CTSS/CLEC7A/ITGB2/FCER1G/CLEC4A/S100A9/MYD88/RIPK2/NFKBIA/TLR2/CD14/CLEC4E/ITGAM/ICAM3/TNFAIP3/S100A8/LYN/NFKB1/MALT1/FYN/BIRC3/FFAR2/CLEC10A	24	M1
GO:0030198	extracellular matrix organization	24/399	334/17913	5.18e-07	1.95e-05	1.38e-05	CD44/TIMP1/CTSS/ITGAX/VCAN/TNFRSF1B/ITGB2/SULF2/THBS1/CYP1B1/TGFB1/ITGAM/B4GALT1/ADAM8/ICAM3/NFKB2/ITGB1/LAMB3/CAPN2/PTX3/LCP1/ITGA5/QSOX1/IL6	24	M1
GO:0032386	regulation of intracellular transport	24/399	400/17913	1.18e-05	0.000248604	0.000176147	PTGS2/IL1B/ITGB2/EHD1/FGR/FLNA/FCER1G/TGFB1/MSN/LRRK2/ITGAM/ADGRE2/NDEL1/EZR/LYN/PLK3/FYN/ANXA2/GRASP/PRKCB/ZC3H12A/LCP1/INSIG1/STXBP2	24	M1
GO:0042326	negative regulation of phosphorylation	24/399	455/17913	9.22e-05	0.00145358	0.00102993	SAMSN1/PTPRC/IL1B/PPIF/RNF149/DUSP1/C9orf72/SOCS3/TGFB1/LRRK2/CDKN1A/TNFAIP3/WARS/EZR/ITPRIP/LYN/DUSP6/PPP1R15B/PRKAG2/STAT3/MYADM/ZC3H12A/TRIB1/INHBA	24	M1
GO:0050707	regulation of cytokine secretion	23/399	201/17913	1.39e-10	1.99e-08	1.41e-08	FCN1/TNFRSF1B/NLRP3/IL1B/LILRA5/FGR/CARD16/CASP1/RIPK2/TLR2/CD14/LRRK2/CLEC4E/TNFAIP3/SELENOK/EZR/LYN/OSM/IL1A/IL1R2/ZC3H12A/FFAR2/CLEC5A	23	M1
GO:0045766	positive regulation of angiogenesis	23/399	203/17913	1.7e-10	2.29e-08	1.62e-08	ITGAX/C5AR1/BTG1/PTGS2/IL1B/ITGB2/VEGFA/CXCL8/CTSH/CYBB/THBS1/CYP1B1/HIF1A/ITGB1/IL1A/STAT3/PRKCB/ZC3H12A/AGO2/ITGA5/HK2/ADM/F3	23	M1
GO:0046651	lymphocyte proliferation	23/399	244/17913	6.34e-09	5.12e-07	3.63e-07	SLC11A1/CD55/PTPRC/TNFRSF1B/IL1B/LILRB2/CORO1A/CTNNB1/RIPK2/LST1/TGFB1/MSN/CDKN1A/PNP/MNDA/SELENOK/VSIR/MALT1/CEBPB/FYN/DOCK8/SASH3/IL6	23	M1
GO:0032943	mononuclear cell proliferation	23/399	246/17913	7.41e-09	5.68e-07	4.02e-07	SLC11A1/CD55/PTPRC/TNFRSF1B/IL1B/LILRB2/CORO1A/CTNNB1/RIPK2/LST1/TGFB1/MSN/CDKN1A/PNP/MNDA/SELENOK/VSIR/MALT1/CEBPB/FYN/DOCK8/SASH3/IL6	23	M1
GO:0007249	I-kappaB kinase/NF-kappaB signaling	23/399	253/17913	1.26e-08	8.9e-07	6.31e-07	S100A4/IL1B/S100A12/FLNA/CARD16/CASP1/MYD88/CTNNB1/RIPK2/NFKBIA/REL/TLR2/CD14/AKAP13/TNFAIP3/LITAF/MALT1/DDX21/FYN/BIRC3/TNFRSF10B/PRKCB/ZC3H12A	23	M1
GO:0051251	positive regulation of lymphocyte activation	23/399	258/17913	1.82e-08	1.18e-06	8.33e-07	CD55/PTPRC/NLRP3/IL1B/LILRB2/MAP3K8/CORO1A/RIPK2/TGFB1/CDKN1A/NFKBIZ/ADAM8/PNP/SELENOK/RARA/LYN/VSIR/CD86/MALT1/FYN/DOCK8/SASH3/IL6	23	M1
GO:1902105	regulation of leukocyte differentiation	23/399	267/17913	3.46e-08	1.92e-06	1.36e-06	PTPRC/NLRP3/LILRB2/LILRB3/EVI2B/CTNNB1/RIPK2/MAFB/TGFB1/NFKBIZ/ADAM8/PNP/RARA/LYN/VSIR/CD86/MALT1/CEBPB/NFAM1/ZC3H12A/TRIB1/SASH3/INHBA	23	M1
GO:0002793	positive regulation of peptide secretion	23/399	275/17913	5.97e-08	2.85e-06	2.02e-06	FCN1/NLRP3/IL1B/LILRA5/FGR/CASP1/RIPK2/TLR2/CD14/TGFB1/LRRK2/CLEC4E/ADAM8/SELENOK/EZR/S100A8/HIF1A/OSM/IL1A/FFAR2/HCAR2/CLEC5A/IL6	23	M1
GO:0043434	response to peptide hormone	23/399	404/17913	4.07e-05	0.000738811	0.000523479	TIMP1/ATP2B1/PTGS2/IL1B/EREG/PTPRE/CYBB/SYAP1/TLR2/TGFB1/NDEL1/LYN/AREG/TCIRG1/NFKB1/FYN/RAB31/ATP6V0D1/STAT3/ATP6V1B2/PRKCB/IQGAP1/ADM	23	M1
GO:0043900	regulation of multi-organism process	23/399	408/17913	4.74e-05	0.000826314	0.000585479	FCN1/TIMP1/CD55/IL1B/CXCL8/CARD16/RIPK2/CHD1/IFITM2/FGL2/B4GALT1/TNFAIP3/SELENOK/DDX5/APOBEC3A/VPS37B/ANXA2/BIRC3/ZC3H12A/PTX3/TRIB1/AGO2/INHBA	23	M1
GO:0050731	positive regulation of peptidyl-tyrosine phosphorylation	22/399	184/17913	1.5e-10	2.08e-08	1.47e-08	CD44/PTPRC/EREG/VEGFA/LILRA5/HBEGF/RIPK2/SOCS3/TGFB1/LYN/AREG/NCF1/OSM/FYN/STAT3/NEDD9/IL6R/ADAM17/ITGA5/IQGAP1/EHD4/IL6	22	M1
GO:0050870	positive regulation of T cell activation	22/399	198/17913	6.21e-10	7.46e-08	5.29e-08	CD55/PTPRC/NLRP3/IL1B/LILRB2/MAP3K8/CORO1A/RIPK2/TGFB1/NFKBIZ/ADAM8/PNP/SELENOK/RARA/LYN/VSIR/CD86/MALT1/FYN/DOCK8/SASH3/IL6	22	M1
GO:0030217	T cell differentiation	22/399	234/17913	1.43e-08	9.61e-07	6.81e-07	PTPRC/NLRP3/LILRB2/CTNNB1/RIPK2/MAFB/TGFB1/CLEC4E/NFKBIZ/ADAM8/PNP/RARA/VSIR/CD86/TCIRG1/MALT1/STAT3/ZC3H12A/ADAM17/JMJD6/SASH3/IL6	22	M1
GO:0050714	positive regulation of protein secretion	22/399	256/17913	7.2e-08	3.24e-06	2.29e-06	FCN1/NLRP3/IL1B/LILRA5/FGR/CASP1/RIPK2/TLR2/CD14/TGFB1/LRRK2/CLEC4E/ADAM8/SELENOK/EZR/HIF1A/OSM/IL1A/FFAR2/HCAR2/CLEC5A/IL6	22	M1
GO:0051091	positive regulation of DNA-binding transcription factor activity	22/399	257/17913	7.71e-08	3.43e-06	2.43e-06	NLRP3/IL1B/S100A12/ITGB2/VEGFA/CARD16/S100A9/MYD88/CTNNB1/RIPK2/TLR2/TGFB1/ADAM8/S100A8/NFKB2/LRRFIP1/NFKB1/MALT1/STAT3/NFAM1/PRKCB/IL6	22	M1
GO:0097193	intrinsic apoptotic signaling pathway	22/399	277/17913	2.86e-07	1.14e-05	8.11e-06	CD44/PLAUR/PTGS2/SOD2/TNFRSF1B/PPIF/MCL1/S100A9/CYP1B1/LRRK2/BID/SKIL/CDKN1A/IVNS1ABP/PPP1R15A/SELENOK/S100A8/HIF1A/CEBPB/DDX5/TNFRSF10B/SNAI1	22	M1
GO:0043405	regulation of MAP kinase activity	22/399	322/17913	3.54e-06	9.15e-05	6.48e-05	C5AR1/FPR1/PTPRC/IL1B/S100A12/VEGFA/MAP3K8/DUSP1/RIPK2/THBS1/MAP3K2/TGFB1/LRRK2/ADAM8/AKAP13/LYN/DUSP6/ZEB2/TRIB1/MAP2K3/IQGAP1/PROK2	22	M1
GO:0071902	positive regulation of protein serine/threonine kinase activity	22/399	322/17913	3.54e-06	9.15e-05	6.48e-05	C5AR1/FPR1/PTPRC/IL1B/S100A12/VEGFA/ACSL1/MAP3K8/RIPK2/THBS1/SYAP1/MAP3K2/TGFB1/LRRK2/ADAM8/AKAP13/DUSP6/ZEB2/ADAM17/MAP2K3/IQGAP1/PROK2	22	M1
GO:0007596	blood coagulation	22/399	331/17913	5.52e-06	0.000134021	9.5e-05	SERPINA1/PLAUR/EHD1/FLNA/FCER1G/JMJD1C/THBS1/LCP2/H3F3A/LYN/F5/PLEK/FERMT3/FYN/MYH9/DOCK8/PRKCB/SERPINB2/THBD/RAB27A/F3/IL6	22	M1
GO:0007599	hemostasis	22/399	336/17913	7.01e-06	0.000163053	0.00011553	SERPINA1/PLAUR/EHD1/FLNA/FCER1G/JMJD1C/THBS1/LCP2/H3F3A/LYN/F5/PLEK/FERMT3/FYN/MYH9/DOCK8/PRKCB/SERPINB2/THBD/RAB27A/F3/IL6	22	M1
GO:0050817	coagulation	22/399	337/17913	7.34e-06	0.000169153	0.000119852	SERPINA1/PLAUR/EHD1/FLNA/FCER1G/JMJD1C/THBS1/LCP2/H3F3A/LYN/F5/PLEK/FERMT3/FYN/MYH9/DOCK8/PRKCB/SERPINB2/THBD/RAB27A/F3/IL6	22	M1
GO:0019216	regulation of lipid metabolic process	22/399	402/17913	0.000106346	0.00163002	0.00115494	G0S2/PTGS2/IL1B/ACSL1/FGR/GLIPR1/SOCS3/TGFB1/TSPO/LYN/NFKB1/PRKAG2/LPCAT1/CAPN2/RXRA/PLIN2/ACSL3/SNAI1/INSIG1/FPR2/HCAR2/ADM	22	M1
GO:0022604	regulation of cell morphogenesis	22/399	430/17913	0.000275258	0.00358108	0.00253735	CD44/ITGB2/VEGFA/FGR/FLNA/S100A10/LIMS1/FMNL1/CORO1A/FGD4/LST1/MSN/LRRK2/SKIL/NDEL1/EZR/ZEB2/FYN/MYH9/MYADM/NEDD9/DIAPH1	22	M1
GO:0006875	cellular metal ion homeostasis	22/399	467/17913	0.00083425	0.0086038	0.00609616	SLC11A1/ATP2B1/CD55/PTPRC/CD52/CORO1A/S100A9/TGFB1/FTH1/S100A8/HIF1A/LYN/TCIRG1/FYN/ATP6V0D1/ANXA2/PRKCB/ATP1B3/FBXL5/DIAPH1/ADM/PROK2	22	M1
GO:0006914	autophagy	22/399	471/17913	0.000932031	0.00948027	0.00671718	NAMPT/GABARAPL1/C9orf72/MCL1/S100A9/RIPK2/LRRK2/FOXO3/TSPO/VMP1/S100A8/HIF1A/PLK3/TCIRG1/ATP6V0D1/PRKAG2/STAT3/VPS37B/ATP6V1B2/ZC3H12A/HK2/QSOX1	22	M1
GO:0061919	process utilizing autophagic mechanism	22/399	471/17913	0.000932031	0.00948027	0.00671718	NAMPT/GABARAPL1/C9orf72/MCL1/S100A9/RIPK2/LRRK2/FOXO3/TSPO/VMP1/S100A8/HIF1A/PLK3/TCIRG1/ATP6V0D1/PRKAG2/STAT3/VPS37B/ATP6V1B2/ZC3H12A/HK2/QSOX1	22	M1
GO:0048871	multicellular organismal homeostasis	22/399	472/17913	0.00095797	0.0095767	0.0067855	G0S2/SLC11A1/PTGS2/IL1B/VEGFA/KDM6B/ACSL1/METRNL/CORO1A/CTSH/CTNNB1/ADAM8/TNFAIP3/TCIRG1/CEBPB/TLE3/IL1A/STAT3/LPCAT1/ADAM17/SASH3/IL6	22	M1
GO:0050729	positive regulation of inflammatory response	21/399	153/17913	2.84e-11	4.86e-09	3.44e-09	NEAT1/PTGS2/IL1B/S100A12/ITGB2/LILRA5/FCER1G/S100A9/MYD88/GPSM3/NFKBIA/TLR2/LRRK2/ITGAM/NFKBIZ/ADAM8/S100A8/OSM/CEBPB/FFAR2/IL6	21	M1
GO:2000377	regulation of reactive oxygen species metabolic process	21/399	194/17913	2.47e-09	2.39e-07	1.69e-07	PTGS2/IL1B/ITGB2/GCH1/THBS1/CYP1B1/TGFB1/FOXO3/CDKN1A/ITGAM/TSPO/HIF1A/FYN/STAT3/BST1/ZC3H12A/PTX3/HK2/FPR2/RAB27A/HP	21	M1
GO:0002526	acute inflammatory response	21/399	220/17913	2.34e-08	1.41e-06	9.96e-07	SERPINA1/C5AR1/CD55/PTGS2/NLRP3/TREM1/CFP/IL1B/FCER1G/B4GALT1/ADAM8/S100A8/OSM/CEBPB/IL1A/STAT3/IL6R/FFAR2/F3/HP/IL6	21	M1
GO:0051235	maintenance of location	21/399	286/17913	1.9e-06	5.57e-05	3.94e-05	PTPRC/IL1B/EHD1/FLNA/CORO1A/S100A9/NFKBIA/TGFB1/FTH1/TSPO/EZR/S100A8/LYN/NFKB1/PLIN2/ZC3H12A/DIAPH1/HK2/INSIG1/FFAR2/IL6	21	M1
GO:0045862	positive regulation of proteolysis	21/399	333/17913	1.99e-05	0.000394865	0.000279779	TNFRSF1B/NLRP3/IL1B/CTSH/CASP1/S100A9/RIPK2/LRRK2/ADAM8/AKIRIN2/S100A8/LYN/VSIR/PLK3/FYN/STAT3/MYH9/TNFRSF10B/ZC3H12A/TRIB1/F3	21	M1
GO:0010876	lipid localization	21/399	366/17913	7.85e-05	0.00126908	0.0008992	IL1B/AQP9/PNPLA8/EHD1/ACSL1/NFKBIA/THBS1/TSPO/NFKB1/GLTP/PRKAG2/ANXA2/RXRA/APOBR/PLIN2/ZC3H12A/ACSL3/FFAR2/INHBA/CES1/IL6	21	M1
GO:0009896	positive regulation of catabolic process	21/399	392/17913	0.000203551	0.00279617	0.00198121	TNFRSF1B/IL1B/C9orf72/RIPK2/MSN/LRRK2/FOXO3/ADAM8/TNFAIP3/EZR/HIF1A/VSIR/PFKFB3/PLK3/LPCAT1/ZC3H12A/FBXL5/TRIB1/AGO2/HK2/IL6	21	M1
GO:0001933	negative regulation of protein phosphorylation	21/399	416/17913	0.000449814	0.00541849	0.00383923	SAMSN1/PTPRC/IL1B/RNF149/DUSP1/C9orf72/SOCS3/TGFB1/LRRK2/CDKN1A/TNFAIP3/WARS/EZR/ITPRIP/LYN/DUSP6/PPP1R15B/PRKAG2/MYADM/ZC3H12A/TRIB1	21	M1
GO:0009991	response to extracellular stimulus	21/399	498/17913	0.00407741	0.0263028	0.0186366	NAMPT/ATP2B1/PTPRC/PTGS2/IL1B/ACSL1/UPP1/CYBB/KYNU/TGFB1/LRRK2/FOXO3/CDKN1A/TSPO/RARA/LYN/ASGR1/FYN/ZC3H12A/ACSL3/ADM	21	M1
GO:0097529	myeloid leukocyte migration	20/399	170/17913	1.38e-09	1.43e-07	1.01e-07	JAML/C5AR1/S100A12/ITGB2/CXCL8/CSF3R/DUSP1/PDE4B/S100A9/THBS1/ADAM8/ADGRE2/RIPOR2/S100A8/LYN/BST1/IL6R/FPR2/CXCL3/IL6	20	M1
GO:0042098	T cell proliferation	20/399	177/17913	2.82e-09	2.66e-07	1.89e-07	SLC11A1/CD55/PTPRC/TNFRSF1B/IL1B/LILRB2/CORO1A/CTNNB1/RIPK2/TGFB1/MSN/PNP/SELENOK/VSIR/MALT1/CEBPB/FYN/DOCK8/SASH3/IL6	20	M1
GO:0002685	regulation of leukocyte migration	20/399	186/17913	6.69e-09	5.26e-07	3.73e-07	C5AR1/VEGFA/CXCL8/DUSP1/OXSR1/GPSM3/THBS1/TGFB1/MSN/ADAM8/CCL20/SELENOK/RIPOR2/LYN/BST1/DOCK8/IL6R/ADAM17/FPR2/IL6	20	M1
GO:0002699	positive regulation of immune effector process	20/399	198/17913	1.95e-08	1.24e-06	8.79e-07	PTPRC/NLRP3/IL1B/ITGB2/FGR/FCER1G/RIPK2/TGFB1/ITGAM/NFKBIZ/ADGRE2/RARA/LYN/CD86/MALT1/DDX21/FFAR2/STXBP2/SASH3/IL6	20	M1
GO:0070663	regulation of leukocyte proliferation	20/399	214/17913	7.21e-08	3.24e-06	2.29e-06	CD55/PTPRC/TNFRSF1B/IL1B/LILRB2/CORO1A/CTNNB1/RIPK2/LST1/TGFB1/CDKN1A/PNP/TNFAIP3/MNDA/SELENOK/LYN/VSIR/CEBPB/SASH3/IL6	20	M1
GO:0043122	regulation of I-kappaB kinase/NF-kappaB signaling	20/399	224/17913	1.53e-07	6.35e-06	4.5e-06	S100A4/IL1B/S100A12/FLNA/CARD16/CASP1/MYD88/CTNNB1/RIPK2/REL/AKAP13/TNFAIP3/LITAF/MALT1/DDX21/FYN/BIRC3/TNFRSF10B/PRKCB/ZC3H12A	20	M1
GO:0048872	homeostasis of number of cells	20/399	241/17913	4.98e-07	1.89e-05	1.34e-05	VEGFA/FCER1G/CORO1A/PDE4B/MAFB/TGFB1/FOXO3/SKIL/TNFAIP3/HIF1A/LYN/TCIRG1/DOCK10/STAT3/ADAM17/JMJD6/HCAR2/SASH3/INHBA/IL6	20	M1
GO:0042742	defense response to bacterium	20/399	245/17913	6.46e-07	2.23e-05	1.58e-05	SLC11A1/C5AR1/NLRP3/CFP/S100A12/FGR/S100A9/MYD88/RIPK2/TLR2/CLEC4E/MPEG1/CCL20/S100A8/CEBPB/IL6R/ADAM17/FPR2/HP/IL6	20	M1
GO:0001818	negative regulation of cytokine production	20/399	290/17913	8.56e-06	0.000188365	0.000133465	SLC11A1/ATP2B1/PTPRC/NLRP3/LILRA5/CLEC4A/CARD16/REL/THBS1/TGFB1/TNFAIP3/TSPO/EZR/RARA/VSIR/NFKB1/IL1R2/ZC3H12A/INHBA/IL6	20	M1
GO:0016485	protein processing	20/399	295/17913	1.1e-05	0.000235328	0.00016674	CTSS/C5AR1/CD55/CFP/IL1B/CARD16/CTSH/CASP1/RIPK2/THBS1/LRRK2/ADAM8/VSIR/ATP6AP2/CAST/MYH9/CAPN2/IL1R2/F3/CES1	20	M1
GO:0071496	cellular response to external stimulus	20/399	320/17913	3.55e-05	0.000649981	0.00046054	NAMPT/ATP2B1/PTPRC/PTGS2/IL1B/UPP1/CASP1/MYD88/CYBB/MAP3K2/TGFB1/LRRK2/CDKN1A/RIPOR2/LYN/NFKB1/ASGR1/FYN/TNFRSF10B/ZC3H12A	20	M1
GO:0032102	negative regulation of response to external stimulus	20/399	343/17913	9.31e-05	0.00145965	0.00103422	PLAUR/PTPRC/TNFRSF1B/NLRP3/METRNL/CARD16/DUSP1/THBS1/SOCS3/CDKN1A/FGL2/TNFAIP3/NFKB1/IL1R2/ZC3H12A/TRIB1/SERPINB2/THBD/FPR2/TNFAIP6	20	M1
GO:0051604	protein maturation	20/399	353/17913	0.000137183	0.00203259	0.00144018	CTSS/C5AR1/CD55/CFP/IL1B/CARD16/CTSH/CASP1/RIPK2/THBS1/LRRK2/ADAM8/VSIR/ATP6AP2/CAST/MYH9/CAPN2/IL1R2/F3/CES1	20	M1
GO:0035690	cellular response to drug	20/399	362/17913	0.00019175	0.00267188	0.00189314	PTGS2/IL1B/PPIF/KDM6B/RNF149/PDE4B/CTNNB1/CYBB/RIPK2/PDE4A/CYP1B1/TGFB1/LRRK2/FOXO3/TNFAIP3/VIM/NFKB1/FYN/ZC3H12A/IL6	20	M1
GO:1901653	cellular response to peptide	20/399	364/17913	0.000206196	0.00279617	0.00198121	NAMPT/ATP2B1/IL1B/PTPRE/RIPK2/SYAP1/TGFB1/FOXO3/NDEL1/LYN/VIM/TCIRG1/NFKB1/FYN/RAB31/ATP6V0D1/STAT3/ATP6V1B2/PRKCB/FPR2	20	M1
GO:0070482	response to oxygen levels	20/399	389/17913	0.00048565	0.00569582	0.00403573	NAMPT/PTGS2/MALAT1/VEGFA/CARD16/CYBB/THBS1/TLR2/TGFB1/FOXO3/CDKN1A/ADAM8/BACH1/HIF1A/PLK3/ATP6V0D1/CAPN2/ADAM17/HK2/ADM	20	M1
GO:0046394	carboxylic acid biosynthetic process	20/399	426/17913	0.00147726	0.0130545	0.00924969	VCAN/PTGS2/IL1B/PNPLA8/ALOX5/GCH1/KYNU/TGFB1/DSE/HIF1A/LTA4H/PFKFB3/NFKB1/PRKAG2/STAT3/RANBP2/ACSL3/HK2/INSIG1/ALOX5AP	20	M1
GO:0016053	organic acid biosynthetic process	20/399	427/17913	0.00151885	0.0132899	0.00941647	VCAN/PTGS2/IL1B/PNPLA8/ALOX5/GCH1/KYNU/TGFB1/DSE/HIF1A/LTA4H/PFKFB3/NFKB1/PRKAG2/STAT3/RANBP2/ACSL3/HK2/INSIG1/ALOX5AP	20	M1
GO:0001667	ameboidal-type cell migration	20/399	446/17913	0.00252046	0.0188097	0.0133275	TIMP1/PTGS2/ITGB2/VEGFA/HBEGF/CTSH/THBS1/CYP1B1/TGFB1/IQSEC1/HIF1A/ITGB1/ZEB2/GLIPR2/MYH9/MAP4K4/ZC3H12A/AGO2/ADAM17/MAP2K3	20	M1
GO:0050769	positive regulation of neurogenesis	20/399	455/17913	0.0031616	0.0222363	0.0157553	TNFRSF1B/IL1B/VEGFA/FLNA/S100A9/CTNNB1/TLR2/TGFB1/SPAG9/SKIL/TSPO/NDEL1/RARA/HIF1A/LYN/NUMB/ZEB2/FYN/IQGAP1/IL6	20	M1
GO:1903555	regulation of tumor necrosis factor superfamily cytokine production	19/399	155/17913	1.79e-09	1.8e-07	1.28e-07	PTPRC/LILRA5/FCER1G/CLEC4A/CYBB/RIPK2/THBS1/TLR2/CD14/LRRK2/ADAM8/TNFAIP3/SELENOK/TSPO/RARA/VSIR/CD86/ZC3H12A/SASH3	19	M1
GO:0002285	lymphocyte activation involved in immune response	19/399	158/17913	2.47e-09	2.39e-07	1.69e-07	SLC11A1/PTPRC/NLRP3/CORO1A/RIPK2/TGFB1/CLEC4E/FGL2/NFKBIZ/RARA/CD86/MALT1/DOCK10/STAT3/ZC3H12A/LCP1/CD1C/RAB27A/IL6	19	M1
GO:0071706	tumor necrosis factor superfamily cytokine production	19/399	161/17913	3.4e-09	3.15e-07	2.23e-07	PTPRC/LILRA5/FCER1G/CLEC4A/CYBB/RIPK2/THBS1/TLR2/CD14/LRRK2/ADAM8/TNFAIP3/SELENOK/TSPO/RARA/VSIR/CD86/ZC3H12A/SASH3	19	M1
GO:1903708	positive regulation of hemopoiesis	19/399	182/17913	2.6e-08	1.5e-06	1.07e-06	PTPRC/NLRP3/LILRB2/EVI2B/RIPK2/TGFB1/FOXO3/NFKBIZ/ADAM8/PNP/RARA/HIF1A/VSIR/CD86/MALT1/STAT3/TRIB1/SASH3/INHBA	19	M1
GO:2001234	negative regulation of apoptotic signaling pathway	19/399	223/17913	6.44e-07	2.23e-05	1.58e-05	CD44/PLAUR/PTGS2/SOD2/IL1B/PPIF/MCL1/CTNNB1/THBS1/LRRK2/BID/IVNS1ABP/TNFAIP3/ITPRIP/HIF1A/IL1A/FYN/TNFRSF10B/SNAI1	19	M1
GO:0043406	positive regulation of MAP kinase activity	19/399	250/17913	3.56e-06	9.15e-05	6.48e-05	C5AR1/FPR1/PTPRC/IL1B/S100A12/VEGFA/MAP3K8/RIPK2/THBS1/MAP3K2/TGFB1/LRRK2/ADAM8/AKAP13/DUSP6/ZEB2/MAP2K3/IQGAP1/PROK2	19	M1
GO:0045637	regulation of myeloid cell differentiation	19/399	250/17913	3.56e-06	9.15e-05	6.48e-05	LILRB3/EVI2B/CSF3R/CTNNB1/NFKBIA/MAFB/THBS1/TGFB1/FOXO3/H3F3A/RARA/HIF1A/LYN/CEBPB/STAT3/PURB/PRKCB/TRIB1/INHBA	19	M1
GO:0002449	lymphocyte mediated immunity	19/399	293/17913	3.37e-05	0.000621786	0.000440562	SLC11A1/CD55/PTPRC/TNFRSF1B/NLRP3/IL1B/FCER1G/SERPINB9/CORO1A/CTSH/TGFB1/FGL2/MYO1G/POU2F2/TCIRG1/MALT1/SASH3/RAB27A/IL6	19	M1
GO:0007568	aging	19/399	318/17913	0.000100933	0.00157421	0.00111539	TIMP1/NAMPT/ATP2B1/PTGS2/SOD2/TNFRSF1B/BCL2A1/ITGB2/LIMS1/KYNU/TGFB1/LRRK2/FOXO3/CDKN1A/TSPO/LITAF/NFKB2/STAT3/ADM	19	M1
GO:0046677	response to antibiotic	19/399	328/17913	0.000150985	0.00220043	0.0015591	PPIF/KDM6B/DUSP1/CYBB/CYP1B1/CD14/LRRK2/FOXO3/TNFAIP3/S100A8/RARA/AREG/FYN/PPP1R15B/STAT3/CAPN2/ZC3H12A/HP/IL6	19	M1
GO:0031331	positive regulation of cellular catabolic process	19/399	341/17913	0.000247916	0.00330927	0.00234476	TNFRSF1B/IL1B/C9orf72/RIPK2/MSN/LRRK2/FOXO3/ADAM8/TNFAIP3/EZR/HIF1A/PFKFB3/PLK3/ZC3H12A/FBXL5/TRIB1/AGO2/HK2/IL6	19	M1
GO:0070997	neuron death	19/399	347/17913	0.000308602	0.00391924	0.00277695	NAMPT/C5AR1/SOD2/TNFRSF1B/ITGB2/CORO1A/MCL1/CTNNB1/REL/LRRK2/FOXO3/BID/ITGAM/ADAM8/HIF1A/CEBPB/FYN/STAT3/CAPN2	19	M1
GO:0048545	response to steroid hormone	19/399	375/17913	0.000795055	0.00825706	0.00585048	ATP2B1/PTGS2/DUSP1/CTNNB1/CYBB/THBS1/TLR2/TGFB1/FOXO3/CDKN1A/AKAP13/IL1RN/TSPO/RARA/AREG/DDX5/RXRA/ADM/IL6	19	M1
GO:0001503	ossification	19/399	388/17913	0.00118698	0.0111076	0.00787024	VCAN/ATP2B1/PTGS2/FGR/CTNNB1/TGFB1/H3F3A/HIF1A/AREG/TCIRG1/CEBPB/DDX5/DDX21/TPM4/SNAI1/IL6R/JUNB/CLEC5A/IL6	19	M1
GO:0048608	reproductive structure development	19/399	426/17913	0.00339093	0.0229013	0.0162266	PTGS2/EREG/VEGFA/FLNA/CTNNB1/SOCS3/FOXO3/BASP1/H3F3A/RARA/HIF1A/CEBPB/RXRA/PHLDA2/PTX3/SNAI1/JUNB/ADM/INHBA	19	M1
GO:0061458	reproductive system development	19/399	429/17913	0.00365808	0.0244882	0.0173509	PTGS2/EREG/VEGFA/FLNA/CTNNB1/SOCS3/FOXO3/BASP1/H3F3A/RARA/HIF1A/CEBPB/RXRA/PHLDA2/PTX3/SNAI1/JUNB/ADM/INHBA	19	M1
GO:0022411	cellular component disassembly	19/399	492/17913	0.0147045	0.0671064	0.0475477	CD44/TIMP1/CTSS/GABARAPL1/CTNNB1/TGFB1/ITGAM/ADAM8/TSPO/NDEL1/HIF1A/PLK3/CAPG/PLEK/CAPN2/PRKCB/LCP1/HK2/IL6	19	M1
GO:0051092	positive regulation of NF-kappaB transcription factor activity	18/399	149/17913	6.07e-09	5e-07	3.54e-07	NLRP3/IL1B/S100A12/ITGB2/CARD16/S100A9/MYD88/RIPK2/TLR2/TGFB1/ADAM8/S100A8/NFKB2/LRRFIP1/NFKB1/MALT1/STAT3/PRKCB	18	M1
GO:0050670	regulation of lymphocyte proliferation	18/399	199/17913	5.3e-07	1.96e-05	1.39e-05	CD55/PTPRC/TNFRSF1B/IL1B/LILRB2/CORO1A/CTNNB1/RIPK2/LST1/TGFB1/CDKN1A/PNP/MNDA/SELENOK/VSIR/CEBPB/SASH3/IL6	18	M1
GO:0032944	regulation of mononuclear cell proliferation	18/399	200/17913	5.7e-07	2.08e-05	1.47e-05	CD55/PTPRC/TNFRSF1B/IL1B/LILRB2/CORO1A/CTNNB1/RIPK2/LST1/TGFB1/CDKN1A/PNP/MNDA/SELENOK/VSIR/CEBPB/SASH3/IL6	18	M1
GO:0002573	myeloid leukocyte differentiation	18/399	201/17913	6.14e-07	2.2e-05	1.56e-05	VEGFA/LILRB3/FCER1G/EVI2B/CTNNB1/MAFB/TLR2/TGFB1/OSCAR/RARA/LYN/TCIRG1/CEBPB/MYH9/ANXA2/TRIB1/JUNB/INHBA	18	M1
GO:2000116	regulation of cysteine-type endopeptidase activity	18/399	222/17913	2.59e-06	7.19e-05	5.09e-05	CD44/PLAUR/PTGS2/NLRP3/VEGFA/SERPINB9/CARD16/CTSH/CASP1/S100A9/RIPK2/THBS1/S100A8/CAST/FYN/BIRC3/TNFRSF10B/F3	18	M1
GO:0031589	cell-substrate adhesion	18/399	322/17913	0.000344868	0.00431814	0.00305959	CD44/ITGB2/VEGFA/FLNA/S100A10/LIMS1/CORO1A/CTNNB1/THBS1/MYO1G/ITGB1/FERMT3/BST1/MYADM/NEDD9/MAP4K4/ITGA5/IQGAP1	18	M1
GO:0010631	epithelial cell migration	18/399	354/17913	0.00104041	0.0102089	0.00723345	PTGS2/ITGB2/VEGFA/HBEGF/CTSH/THBS1/CYP1B1/TGFB1/IQSEC1/HIF1A/ITGB1/ZEB2/GLIPR2/MYH9/MAP4K4/ZC3H12A/ADAM17/MAP2K3	18	M1
GO:0090132	epithelium migration	18/399	357/17913	0.00114432	0.0108919	0.00771736	PTGS2/ITGB2/VEGFA/HBEGF/CTSH/THBS1/CYP1B1/TGFB1/IQSEC1/HIF1A/ITGB1/ZEB2/GLIPR2/MYH9/MAP4K4/ZC3H12A/ADAM17/MAP2K3	18	M1
GO:0042692	muscle cell differentiation	18/399	359/17913	0.0012184	0.0113777	0.00806159	SOD2/EREG/VEGFA/EHD1/KDM6B/CTNNB1/TGFB1/SPAG9/CD53/AKAP13/H3F3A/RIPOR2/RARA/ITGB1/MYH9/CAPN2/RXRA/ADM	18	M1
GO:0090130	tissue migration	18/399	363/17913	0.00137886	0.0124827	0.00884456	PTGS2/ITGB2/VEGFA/HBEGF/CTSH/THBS1/CYP1B1/TGFB1/IQSEC1/HIF1A/ITGB1/ZEB2/GLIPR2/MYH9/MAP4K4/ZC3H12A/ADAM17/MAP2K3	18	M1
GO:0036293	response to decreased oxygen levels	18/399	365/17913	0.0014656	0.0129772	0.00919492	NAMPT/PTGS2/MALAT1/VEGFA/CARD16/CYBB/THBS1/TLR2/TGFB1/FOXO3/ADAM8/BACH1/HIF1A/PLK3/CAPN2/ADAM17/HK2/ADM	18	M1
GO:0006732	coenzyme metabolic process	18/399	366/17913	0.00151067	0.0132444	0.00938425	SLC2A3/NAMPT/PTGS2/ACSL1/GCH1/KYNU/PNP/VNN2/HIF1A/PFKFB3/ACOT9/PRKAG2/STAT3/BST1/TKT/RANBP2/ACSL3/HK2	18	M1
GO:0016049	cell growth	18/399	466/17913	0.0172501	0.0761435	0.053951	BTG1/VEGFA/HBEGF/C9orf72/S100A9/CTNNB1/TGFB1/CDKN1A/AKAP13/H3F3A/NDEL1/S100A8/ITGB1/ZEB2/ADAM17/IQGAP1/CDA/INHBA	18	M1
GO:0031667	response to nutrient levels	18/399	466/17913	0.0172501	0.0761435	0.053951	NAMPT/ATP2B1/PTGS2/IL1B/ACSL1/UPP1/CYBB/KYNU/TGFB1/LRRK2/FOXO3/CDKN1A/TSPO/RARA/FYN/ZC3H12A/ACSL3/ADM	18	M1
GO:0009150	purine ribonucleotide metabolic process	18/399	500/17913	0.0318617	0.113311	0.0802858	PPIF/ACSL1/PDE4B/KYNU/PDE4A/TGFB1/LRRK2/BID/TSPO/HIF1A/PFKFB3/ACOT9/PRKAG2/STAT3/ATP6V1B2/RANBP2/ACSL3/HK2	18	M1
GO:1901615	organic hydroxy compound metabolic process	18/399	500/17913	0.0318617	0.113311	0.0802858	IL1B/ITGB2/GK/GCH1/CYP1B1/ITGAM/HIF1A/NFKB1/PLEK/ZEB2/PRKAG2/RXRA/APOBR/SNAI1/GK5/INSIG1/CYP4F3/CES1	18	M1
GO:0032675	regulation of interleukin-6 production	17/399	139/17913	1.33e-08	9.13e-07	6.47e-07	IL1B/EREG/LILRB2/LILRA5/FCER1G/MYD88/RIPK2/TLR2/TNFAIP3/AKIRIN2/SELENOK/CEBPB/STAT3/CAPN2/ZC3H12A/IL6R/IL6	17	M1
GO:0032635	interleukin-6 production	17/399	149/17913	3.81e-08	2.07e-06	1.46e-06	IL1B/EREG/LILRB2/LILRA5/FCER1G/MYD88/RIPK2/TLR2/TNFAIP3/AKIRIN2/SELENOK/CEBPB/STAT3/CAPN2/ZC3H12A/IL6R/IL6	17	M1
GO:0032680	regulation of tumor necrosis factor production	17/399	151/17913	4.65e-08	2.3e-06	1.63e-06	PTPRC/LILRA5/FCER1G/CLEC4A/CYBB/RIPK2/THBS1/TLR2/CD14/LRRK2/TNFAIP3/SELENOK/TSPO/RARA/VSIR/ZC3H12A/SASH3	17	M1
GO:0032640	tumor necrosis factor production	17/399	155/17913	6.86e-08	3.14e-06	2.23e-06	PTPRC/LILRA5/FCER1G/CLEC4A/CYBB/RIPK2/THBS1/TLR2/CD14/LRRK2/TNFAIP3/SELENOK/TSPO/RARA/VSIR/ZC3H12A/SASH3	17	M1
GO:0043123	positive regulation of I-kappaB kinase/NF-kappaB signaling	17/399	172/17913	3.13e-07	1.24e-05	8.79e-06	S100A4/S100A12/FLNA/CARD16/CASP1/MYD88/CTNNB1/RIPK2/REL/AKAP13/LITAF/MALT1/DDX21/FYN/BIRC3/TNFRSF10B/PRKCB	17	M1
GO:0002703	regulation of leukocyte mediated immunity	17/399	185/17913	8.79e-07	2.88e-05	2.04e-05	PTPRC/TNFRSF1B/NLRP3/IL1B/ITGB2/FGR/FCER1G/SERPINB9/TGFB1/ITGAM/ADGRE2/LYN/MALT1/DDX21/STXBP2/SASH3/IL6	17	M1
GO:0002440	production of molecular mediator of immune response	17/399	191/17913	1.37e-06	4.17e-05	2.95e-05	SLC11A1/CD55/PTPRC/TNFRSF1B/NLRP3/IL1B/FCER1G/TLR2/TGFB1/FGL2/POU2F2/TCIRG1/MALT1/DDX21/FFAR2/SASH3/IL6	17	M1
GO:0002221	pattern recognition receptor signaling pathway	17/399	197/17913	2.1e-06	6.06e-05	4.29e-05	FCN1/CTSS/CLEC7A/ITGB2/S100A9/MYD88/RIPK2/NFKBIA/TLR2/CD14/CLEC4E/ITGAM/TNFAIP3/S100A8/LYN/BIRC3/FFAR2	17	M1
GO:0097191	extrinsic apoptotic signaling pathway	17/399	213/17913	6.06e-06	0.000145626	0.000103182	G0S2/PTPRC/TNFRSF1B/IL1B/MCL1/THBS1/TGFB1/FOXO3/BID/SKIL/TNFAIP3/ITPRIP/IL1A/FYN/TNFRSF10B/IL6R/INHBA	17	M1
GO:0042113	B cell activation	17/399	215/17913	6.87e-06	0.000160614	0.000113802	SAMSN1/PTPRC/TGFB1/CDKN1A/TNFAIP3/MNDA/POU2F2/ITGB1/TCIRG1/MALT1/SKAP2/DOCK10/NFAM1/PRKCB/ADAM17/INHBA/IL6	17	M1
GO:0000302	response to reactive oxygen species	17/399	230/17913	1.67e-05	0.00033959	0.000240614	SOD2/PPIF/KDM6B/DUSP1/GCH1/CYP1B1/LRRK2/FOXO3/TNFAIP3/AREG/PLK3/NCF1/FYN/PPP1R15B/CAPN2/HP/IL6	17	M1
GO:0034330	cell junction organization	17/399	277/17913	0.000168777	0.00239685	0.00169827	VEGFA/FLNA/S100A10/LIMS1/CTNNB1/THBS1/TGFB1/VASP/IQSEC1/PLEC/VMP1/NUMB/LAMB3/MAP4K4/SNAI1/ITGA5/IQGAP1	17	M1
GO:0034612	response to tumor necrosis factor	17/399	284/17913	0.000226826	0.00305528	0.0021648	PTGS2/TNFRSF1B/CXCL8/LIMS1/CARD16/CASP1/GCH1/NFKBIA/THBS1/CD14/FOXO3/GBP2/TNFAIP3/NFKB1/BIRC3/ZC3H12A/ADAM17	17	M1
GO:0009895	negative regulation of catabolic process	17/399	288/17913	0.000267248	0.00354038	0.00250851	TIMP1/NAMPT/SLC11A1/IL1B/FLNA/MCL1/MYD88/LRRK2/TSPO/FYN/STAT3/RYBP/ANXA2/NAF1/QSOX1/HCAR2/HP	17	M1
GO:0034599	cellular response to oxidative stress	17/399	296/17913	0.000367203	0.00452138	0.00320359	SOD2/NCF2/PPIF/KDM6B/MCL1/CTNNB1/CYBB/GCH1/CYP1B1/LRRK2/FOXO3/TNFAIP3/HIF1A/NCF1/FYN/ZC3H12A/IL6	17	M1
GO:0032147	activation of protein kinase activity	17/399	303/17913	0.000479723	0.00564119	0.00399703	SLC11A1/C5AR1/FPR1/PTPRC/IL1B/VEGFA/MAP3K8/RIPK2/THBS1/MAP3K2/LRRK2/DUSP6/MALT1/PRKAG2/TNFRSF10B/MAP2K3/PROK2	17	M1
GO:1901214	regulation of neuron death	17/399	313/17913	0.000691369	0.00751753	0.00532649	C5AR1/SOD2/TNFRSF1B/ITGB2/CORO1A/MCL1/CTNNB1/REL/LRRK2/FOXO3/ITGAM/ADAM8/HIF1A/CEBPB/FYN/STAT3/CAPN2	17	M1
GO:0009615	response to virus	17/399	323/17913	0.000978473	0.00975182	0.00690959	PTPRC/NLRP3/IL1B/FGR/FLNA/IFITM2/IFNGR2/FGL2/IVNS1ABP/TNFAIP3/SELENOK/IFNGR1/DDX21/APOBEC3A/BIRC3/ZC3H12A/IL6	17	M1
GO:0006869	lipid transport	17/399	332/17913	0.0013182	0.0120316	0.00852491	IL1B/AQP9/PNPLA8/ACSL1/NFKBIA/THBS1/TSPO/NFKB1/GLTP/PRKAG2/ANXA2/RXRA/APOBR/PLIN2/ACSL3/INHBA/CES1	17	M1
GO:0010038	response to metal ion	17/399	335/17913	0.00145163	0.0129772	0.00919492	PTGS2/AQP9/PPIF/DUSP1/CYBB/THBS1/CD14/LRRK2/TSPO/S100A8/HIF1A/NCF1/TCIRG1/IL1A/JUNB/IQGAP1/ALOX5AP	17	M1
GO:0150063	visual system development	17/399	346/17913	0.00204275	0.0163017	0.0115504	ATP2B1/VEGFA/CTNNB1/CYP1B1/TGFB1/SKIL/ITGAM/RARA/HIF1A/VIM/TCIRG1/ZEB2/STAT3/LPCAT1/RXRA/JMJD6/INHBA	17	M1
GO:0048880	sensory system development	17/399	351/17913	0.00237172	0.0180829	0.0128125	ATP2B1/VEGFA/CTNNB1/CYP1B1/TGFB1/SKIL/ITGAM/RARA/HIF1A/VIM/TCIRG1/ZEB2/STAT3/LPCAT1/RXRA/JMJD6/INHBA	17	M1
GO:0001666	response to hypoxia	17/399	354/17913	0.00258956	0.0191524	0.0135703	PTGS2/MALAT1/VEGFA/CARD16/CYBB/THBS1/TLR2/TGFB1/FOXO3/ADAM8/BACH1/HIF1A/PLK3/CAPN2/ADAM17/HK2/ADM	17	M1
GO:0072503	cellular divalent inorganic cation homeostasis	17/399	392/17913	0.00711529	0.039485	0.0279768	SLC11A1/ATP2B1/CD55/PTPRC/CD52/CORO1A/S100A9/TGFB1/S100A8/LYN/TCIRG1/FYN/ANXA2/PRKCB/DIAPH1/ADM/PROK2	17	M1
GO:0043087	regulation of GTPase activity	17/399	410/17913	0.0108232	0.0528366	0.037437	S100A10/LIMS1/FGD4/LRRK2/IQSEC1/NDEL1/ITGB1/RIN3/DOCK10/SNX18/NEDD9/DOCK8/RANBP2/MAP4K4/ARHGAP26/IQGAP1/TAGAP	17	M1
GO:0072507	divalent inorganic cation homeostasis	17/399	412/17913	0.0113156	0.0548505	0.0388639	SLC11A1/ATP2B1/CD55/PTPRC/CD52/CORO1A/S100A9/TGFB1/S100A8/LYN/TCIRG1/FYN/ANXA2/PRKCB/DIAPH1/ADM/PROK2	17	M1
GO:0051346	negative regulation of hydrolase activity	17/399	420/17913	0.0134651	0.0624764	0.0442672	CD44/TIMP1/PLAUR/PTGS2/VEGFA/PPIF/SERPINB9/CARD16/THBS1/LRRK2/APLP2/PPP1R15A/PHACTR1/CAST/PTX3/CSTA/IQGAP1	17	M1
GO:0062012	regulation of small molecule metabolic process	17/399	439/17913	0.0198562	0.0813462	0.0576373	PTGS2/IL1B/PPIF/TGFB1/TSPO/HIF1A/PFKFB3/NFKB1/PLEK/PRKAG2/STAT3/RANBP2/PHLDA2/SNAI1/INSIG1/CDA/ADM	17	M1
GO:0090066	regulation of anatomical structure size	17/399	442/17913	0.0210485	0.0855214	0.0605956	ATP2B1/PTGS2/SOD2/VEGFA/CORO1A/GCH1/MSN/LRRK2/VASP/PPP1R15A/NDEL1/EZR/CAPG/PLEK/MYADM/SCPEP1/ADM	17	M1
GO:0070838	divalent metal ion transport	17/399	454/17913	0.0263719	0.0990897	0.0702093	SLC11A1/ATP2B1/PTPRC/PTGS2/LILRB2/LILRA5/CORO1A/PDE4B/CTNNB1/AHNAK/TGFB1/TSPO/LYN/FYN/ANXA2/PRKCB/DIAPH1	17	M1
GO:0072511	divalent inorganic cation transport	17/399	458/17913	0.0283542	0.103747	0.0735091	SLC11A1/ATP2B1/PTPRC/PTGS2/LILRB2/LILRA5/CORO1A/PDE4B/CTNNB1/AHNAK/TGFB1/TSPO/LYN/FYN/ANXA2/PRKCB/DIAPH1	17	M1
GO:0002687	positive regulation of leukocyte migration	16/399	121/17913	1.15e-08	8.28e-07	5.86e-07	C5AR1/VEGFA/CXCL8/OXSR1/GPSM3/THBS1/TGFB1/ADAM8/CCL20/SELENOK/RIPOR2/DOCK8/IL6R/ADAM17/FPR2/IL6	16	M1
GO:0050715	positive regulation of cytokine secretion	16/399	132/17913	4.07e-08	2.11e-06	1.5e-06	FCN1/NLRP3/IL1B/LILRA5/FGR/CASP1/RIPK2/TLR2/CD14/LRRK2/CLEC4E/SELENOK/OSM/IL1A/FFAR2/CLEC5A	16	M1
GO:0046631	alpha-beta T cell activation	16/399	133/17913	4.53e-08	2.26e-06	1.6e-06	CD55/PTPRC/NLRP3/CLEC4A/RIPK2/NFKBIZ/PNP/RARA/VSIR/CD86/TCIRG1/MALT1/STAT3/ZC3H12A/SASH3/IL6	16	M1
GO:0002819	regulation of adaptive immune response	16/399	150/17913	2.46e-07	1e-05	7.1e-06	SLC11A1/SAMSN1/PTPRC/TNFRSF1B/CD48/NLRP3/IL1B/FCER1G/RIPK2/TGFB1/NFKBIZ/TNFAIP3/MALT1/ZC3H12A/SASH3/IL6	16	M1
GO:0045619	regulation of lymphocyte differentiation	16/399	164/17913	8.3e-07	2.77e-05	1.96e-05	PTPRC/NLRP3/LILRB2/RIPK2/TGFB1/NFKBIZ/ADAM8/PNP/RARA/VSIR/CD86/MALT1/NFAM1/ZC3H12A/SASH3/INHBA	16	M1
GO:0034341	response to interferon-gamma	16/399	173/17913	1.69e-06	5.02e-05	3.55e-05	CD44/SLC11A1/IFI30/HLA-C/CASP1/GCH1/KYNU/HLA-B/SOCS3/TLR2/IFITM2/IFNGR2/GBP2/VIM/IFNGR1/STXBP2	16	M1
GO:0050920	regulation of chemotaxis	16/399	186/17913	4.37e-06	0.000108448	7.68e-05	C5AR1/VEGFA/CXCL8/DUSP1/OXSR1/GPSM3/THBS1/TGFB1/RIPOR2/LYN/BST1/IL6R/ADAM17/FPR2/F3/IL6	16	M1
GO:0051701	interaction with host	16/399	211/17913	2.15e-05	0.000420689	0.000298076	FCN1/CD55/ANPEP/CXCL8/SERPINB9/CTNNB1/IFITM2/TGFB1/ITGB1/CD86/VPS37B/RXRA/ZC3H12A/PTX3/ITGA5/CLEC5A	16	M1
GO:0044706	multi-multicellular organism process	16/399	225/17913	4.7e-05	0.00082215	0.000582528	TIMP1/NAMPT/PTGS2/IL1B/TGFB1/B4GALT1/H3F3A/VMP1/RARA/CAPN2/RXRA/JUNB/AGO2/ITGA5/THBD/ADM	16	M1
GO:0097237	cellular response to toxic substance	16/399	241/17913	0.00010598	0.00163002	0.00115494	PTGS2/SOD2/PPIF/KDM6B/S100A9/CYBB/GCH1/CYP1B1/LRRK2/FOXO3/TNFAIP3/NFKB1/ZC3H12A/ALOX5AP/HP/IL6	16	M1
GO:0030100	regulation of endocytosis	16/399	262/17913	0.00027553	0.00358108	0.00253735	SLC11A1/PTPRC/IL1B/VEGFA/FGR/TLR2/CD14/TGFB1/LRRK2/NUMB/RAB31/ANXA2/PTX3/FPR2/EHD4/RAB27A	16	M1
GO:0051188	cofactor biosynthetic process	16/399	310/17913	0.00166891	0.0139705	0.00989869	NAMPT/PTGS2/ACSL1/CYBB/GCH1/KYNU/PNP/TSPO/HIF1A/PFKFB3/FYN/PRKAG2/STAT3/RANBP2/ACSL3/HK2	16	M1
GO:0010506	regulation of autophagy	16/399	314/17913	0.00190077	0.0153338	0.0108647	NAMPT/C9orf72/MCL1/RIPK2/LRRK2/FOXO3/TSPO/HIF1A/PLK3/ATP6V0D1/PRKAG2/STAT3/ATP6V1B2/ZC3H12A/HK2/QSOX1	16	M1
GO:0072330	monocarboxylic acid biosynthetic process	16/399	318/17913	0.00215901	0.0167776	0.0118877	VCAN/PTGS2/IL1B/PNPLA8/ALOX5/DSE/HIF1A/LTA4H/PFKFB3/PRKAG2/STAT3/RANBP2/ACSL3/HK2/INSIG1/ALOX5AP	16	M1
GO:1903829	positive regulation of cellular protein localization	16/399	318/17913	0.00215901	0.0167776	0.0118877	PTGS2/IL1B/ITGB2/FLNA/FCER1G/TGFB1/MSN/BID/ITGAM/EZR/ITGB1/PLK3/FYN/ZC3H12A/ACSL3/IQGAP1	16	M1
GO:0043547	positive regulation of GTPase activity	16/399	339/17913	0.00404268	0.0263028	0.0186366	S100A10/LIMS1/LRRK2/IQSEC1/NDEL1/ITGB1/RIN3/DOCK10/SNX18/NEDD9/DOCK8/RANBP2/MAP4K4/ARHGAP26/IQGAP1/TAGAP	16	M1
GO:0001654	eye development	16/399	342/17913	0.00439799	0.0276508	0.0195918	ATP2B1/VEGFA/CTNNB1/CYP1B1/TGFB1/SKIL/RARA/HIF1A/VIM/TCIRG1/ZEB2/STAT3/LPCAT1/RXRA/JMJD6/INHBA	16	M1
GO:0042176	regulation of protein catabolic process	16/399	354/17913	0.00608398	0.0352585	0.0249822	TIMP1/TNFRSF1B/IL1B/FLNA/MSN/LRRK2/ADAM8/TNFAIP3/EZR/PLK3/FYN/LPCAT1/RYBP/ANXA2/FBXL5/TRIB1	16	M1
GO:0010959	regulation of metal ion transport	16/399	365/17913	0.00805675	0.0428868	0.0303872	ATP2B1/PTGS2/LILRB2/LILRA5/FLNA/CORO1A/OXSR1/PDE4B/CTNNB1/AHNAK/TGFB1/TSPO/LYN/FYN/ATP1B3/DIAPH1	16	M1
GO:0006816	calcium ion transport	16/399	415/17913	0.0242514	0.093493	0.0662438	ATP2B1/PTPRC/PTGS2/LILRB2/LILRA5/CORO1A/PDE4B/CTNNB1/AHNAK/TGFB1/TSPO/LYN/FYN/ANXA2/PRKCB/DIAPH1	16	M1
GO:0050673	epithelial cell proliferation	16/399	425/17913	0.0293322	0.105915	0.0750456	JAML/C5AR1/EREG/VEGFA/SULF2/CTNNB1/THBS1/TGFB1/B4GALT1/TNFAIP3/HIF1A/AREG/CEBPB/STAT3/ADAM17/F3	16	M1
GO:0016569	covalent chromatin modification	16/399	433/17913	0.0339348	0.115989	0.0821834	IL1B/VEGFA/KDM6B/CTNNB1/CHD1/TGFB1/LRRK2/TET2/USP15/PADI4/RYBP/JARID2/USP3/KDM7A/PRKCB/JMJD6	16	M1
GO:0051493	regulation of cytoskeleton organization	16/399	472/17913	0.0641108	0.180248	0.127714	FLNA/S100A10/CORO1A/C9orf72/S100A9/CTNNB1/TGFB1/VASP/AKAP13/S100A8/CAPG/PLEK/BST1/CAPN2/MYADM/DIAPH1	16	M1
GO:0001501	skeletal system development	16/399	479/17913	0.0710103	0.191879	0.135954	CD44/TIMP1/PTPRC/SULF2/FGR/ETS2/CTNNB1/TGFB1/AKAP13/CSRNP1/RARA/HIF1A/ANXA2/TRPS1/SNAI1/INSIG1	16	M1
GO:0002286	T cell activation involved in immune response	15/399	88/17913	9.16e-10	1.03e-07	7.27e-08	SLC11A1/NLRP3/RIPK2/CLEC4E/FGL2/NFKBIZ/RARA/CD86/MALT1/STAT3/ZC3H12A/LCP1/CD1C/RAB27A/IL6	15	M1
GO:0097530	granulocyte migration	15/399	100/17913	5.74e-09	4.9e-07	3.47e-07	JAML/C5AR1/S100A12/ITGB2/CXCL8/CSF3R/PDE4B/S100A9/THBS1/ADAM8/ADGRE2/RIPOR2/S100A8/BST1/CXCL3	15	M1
GO:1902107	positive regulation of leukocyte differentiation	15/399	143/17913	7.25e-07	2.46e-05	1.74e-05	PTPRC/NLRP3/LILRB2/EVI2B/RIPK2/TGFB1/NFKBIZ/ADAM8/PNP/RARA/VSIR/CD86/MALT1/TRIB1/SASH3	15	M1
GO:0042129	regulation of T cell proliferation	15/399	149/17913	1.23e-06	3.79e-05	2.69e-05	CD55/PTPRC/TNFRSF1B/IL1B/LILRB2/CORO1A/CTNNB1/RIPK2/TGFB1/PNP/SELENOK/VSIR/CEBPB/SASH3/IL6	15	M1
GO:0071347	cellular response to interleukin-1	15/399	156/17913	2.2e-06	6.26e-05	4.43e-05	IL1B/MAP3K8/CXCL8/MYD88/RIPK2/NFKBIA/GBP2/IL1RN/HIF1A/NFKB1/CEBPB/IL1A/IL1R2/ZC3H12A/IL6	15	M1
GO:0060759	regulation of response to cytokine stimulus	15/399	183/17913	1.55e-05	0.000317722	0.00022512	PTPRC/CARD16/CASP1/RIPK2/SOCS3/TLR2/IFNGR2/TNFAIP3/IL1RN/HIF1A/IFNGR1/BIRC3/IL1R2/ADAM17/IL6	15	M1
GO:0070555	response to interleukin-1	15/399	183/17913	1.55e-05	0.000317722	0.00022512	IL1B/MAP3K8/CXCL8/MYD88/RIPK2/NFKBIA/GBP2/IL1RN/HIF1A/NFKB1/CEBPB/IL1A/IL1R2/ZC3H12A/IL6	15	M1
GO:0007565	female pregnancy	15/399	193/17913	2.91e-05	0.000549712	0.000389495	TIMP1/NAMPT/PTGS2/IL1B/TGFB1/H3F3A/VMP1/RARA/CAPN2/RXRA/JUNB/AGO2/ITGA5/THBD/ADM	15	M1
GO:0002064	epithelial cell development	15/399	199/17913	4.15e-05	0.000744469	0.000527488	IL1B/FLNA/FOSL2/CTNNB1/MSN/CDKN1A/RILPL2/B4GALT1/EZR/RIPOR2/RARA/HIF1A/VIM/MYADM/IQGAP1	15	M1
GO:0032388	positive regulation of intracellular transport	15/399	203/17913	5.21e-05	0.000884013	0.000626361	PTGS2/IL1B/ITGB2/EHD1/FGR/FLNA/FCER1G/TGFB1/MSN/ITGAM/EZR/PLK3/FYN/ANXA2/ZC3H12A	15	M1
GO:0019882	antigen processing and presentation	15/399	220/17913	0.000129061	0.00193157	0.0013686	CTSS/SLC11A1/NCF2/LILRB2/IFI30/CLEC4A/HLA-C/CTSH/CYBB/THBS1/HLA-B/FGL2/AP1S2/NCF1/RAB27A	15	M1
GO:0050851	antigen receptor-mediated signaling pathway	15/399	224/17913	0.000157446	0.00227224	0.00160998	PTPRC/PDE4B/RIPK2/LCP2/NFKBIZ/FYB1/MNDA/EZR/LYN/NFKB1/MALT1/FYN/NFAM1/PRKCB/ZC3H12A	15	M1
GO:0033002	muscle cell proliferation	15/399	243/17913	0.000378833	0.00465169	0.00329592	NAMPT/PTGS2/SOD2/EREG/HBEGF/CTNNB1/THBS1/CDKN1A/TNFAIP3/STAT3/JARID2/RXRA/TRIB1/IL6R/IL6	15	M1
GO:0031098	stress-activated protein kinase signaling cascade	15/399	278/17913	0.00149683	0.013175	0.00933507	IL1B/VEGFA/MAP3K8/DUSP1/RIPK2/MAP3K2/EZR/LYN/NCF1/NFKB1/ZEB2/MAP4K4/ZC3H12A/TRIB1/MAP2K3	15	M1
GO:0043010	camera-type eye development	15/399	295/17913	0.00265561	0.0193263	0.0136935	ATP2B1/VEGFA/CTNNB1/CYP1B1/TGFB1/SKIL/RARA/HIF1A/VIM/TCIRG1/ZEB2/LPCAT1/RXRA/JMJD6/INHBA	15	M1
GO:0071375	cellular response to peptide hormone stimulus	15/399	297/17913	0.00283093	0.0203196	0.0143973	ATP2B1/IL1B/PTPRE/SYAP1/TGFB1/NDEL1/LYN/TCIRG1/NFKB1/FYN/RAB31/ATP6V0D1/STAT3/ATP6V1B2/PRKCB	15	M1
GO:0006898	receptor-mediated endocytosis	15/399	301/17913	0.00321028	0.0224035	0.0158739	ITGB2/VEGFA/FCER1G/CXCL8/CD14/ITGAM/EZR/ITGB1/NUMB/ASGR1/RAB31/ANXA2/FPR2/ADM/HP	15	M1
GO:0019058	viral life cycle	15/399	324/17913	0.00628694	0.0361519	0.0256152	FCN1/CD55/ANPEP/CXCL8/IFITM2/ITGB1/CD86/DDX5/APOBEC3A/VPS37B/RANBP2/ZC3H12A/PTX3/ITGA5/CLEC5A	15	M1
GO:0045861	negative regulation of proteolysis	15/399	324/17913	0.00628694	0.0361519	0.0256152	CD44/TIMP1/PLAUR/CD55/PTGS2/VEGFA/SERPINB9/CARD16/THBS1/LRRK2/APLP2/CAST/RYBP/IL1R2/CSTA	15	M1
GO:0001101	response to acid chemical	15/399	330/17913	0.00739304	0.0405483	0.0287302	PTGS2/VEGFA/ACSL1/DUSP1/CTSH/CYBB/TLR2/RARA/LYN/CEBPB/FYN/CAPN2/RXRA/ZC3H12A/FFAR2	15	M1
GO:0006631	fatty acid metabolic process	15/399	339/17913	0.00933867	0.0477131	0.0338068	PTGS2/IL1B/PNPLA8/ACSL1/ALOX5/CYP1B1/LTA4H/AOAH/CREM/PRKAG2/ACSL3/INSIG1/ALOX5AP/CYP4F3/CES1	15	M1
GO:0001701	in utero embryonic development	15/399	342/17913	0.0100705	0.0501268	0.035517	VEGFA/CTNNB1/SOCS3/SKIL/NDEL1/HIF1A/ITGB1/CEBPB/MYH9/CAPN2/RXRA/PHLDA2/SNAI1/JUNB/ADM	15	M1
GO:0051260	protein homooligomerization	15/399	345/17913	0.0108468	0.0528642	0.0374566	SOD2/EHD1/FCER1G/GCH1/SPAG9/VASP/BID/B4GALT1/RIPOR2/RXRA/RNF213/JMJD6/CDA/EHD4/ALOX5AP	15	M1
GO:0009165	nucleotide biosynthetic process	15/399	360/17913	0.0154598	0.069624	0.0493316	NAMPT/PTGS2/GPAT3/ACSL1/UPP1/KYNU/TGFB1/PNP/HIF1A/PFKFB3/PRKAG2/STAT3/RANBP2/ACSL3/HK2	15	M1
GO:0019932	second-messenger-mediated signaling	15/399	360/17913	0.0154598	0.069624	0.0493316	FPR1/PTPRC/VEGFA/CXCL8/THBS1/PDE4A/LRRK2/CCL20/AKAP13/SELENOK/PLEK/BST1/NFAT5/FPR2/ADM	15	M1
GO:1901293	nucleoside phosphate biosynthetic process	15/399	365/17913	0.0172943	0.0761874	0.053982	NAMPT/PTGS2/GPAT3/ACSL1/UPP1/KYNU/TGFB1/PNP/HIF1A/PFKFB3/PRKAG2/STAT3/RANBP2/ACSL3/HK2	15	M1
GO:0051098	regulation of binding	15/399	368/17913	0.0184724	0.0795639	0.0563745	PLAUR/S100A10/CARD16/C9orf72/CTNNB1/RIPK2/NFKBIA/SYAP1/TGFB1/LRRK2/RIPOR2/RARA/ANXA2/PHLDA2/CCPG1	15	M1
GO:0050678	regulation of epithelial cell proliferation	15/399	369/17913	0.0188785	0.0809208	0.0573359	JAML/C5AR1/EREG/VEGFA/SULF2/CTNNB1/THBS1/TGFB1/B4GALT1/TNFAIP3/HIF1A/AREG/STAT3/ADAM17/F3	15	M1
GO:0048568	embryonic organ development	15/399	413/17913	0.0443796	0.141512	0.100267	VEGFA/CXCL8/CTNNB1/MAFB/SOCS3/TGFB1/RIPOR2/RARA/HIF1A/CEBPB/PHLDA2/SNAI1/JUNB/INSIG1/ADM	15	M1
GO:0016570	histone modification	15/399	420/17913	0.0500014	0.152858	0.108307	IL1B/VEGFA/KDM6B/CTNNB1/TGFB1/LRRK2/TET2/USP15/PADI4/RYBP/JARID2/USP3/KDM7A/PRKCB/JMJD6	15	M1
GO:0048732	gland development	15/399	422/17913	0.0516951	0.1572	0.111383	VEGFA/SULF2/CTNNB1/MAFB/TGFB1/MSN/TNFAIP3/TSPO/RARA/HIF1A/AREG/CEBPB/JARID2/RXRA/HK2	15	M1
GO:0015711	organic anion transport	15/399	430/17913	0.0588687	0.172227	0.12203	SLC11A1/IL1B/SLC43A2/AQP9/PNPLA8/ACSL1/SLC7A7/THBS1/SLC7A5/GLTP/PRKAG2/RXRA/SLC16A3/PLIN2/ACSL3	15	M1
GO:0023061	signal release	15/399	433/17913	0.0617261	0.176559	0.1251	IL1B/LRRK2/PIM3/IL1RN/HIF1A/LYN/TCIRG1/OSM/MAP4K4/PRKCB/FFAR2/HCAR2/ADM/INHBA/IL6	15	M1
GO:0003012	muscle system process	15/399	448/17913	0.0774218	0.203278	0.144031	ATP2B1/PTGS2/TNFRSF1B/IL1B/SULF2/FLNA/PDE4B/FOXO3/AKAP13/VIM/JARID2/ZC3H12A/TPM4/MAP2K3/PROK2	15	M1
GO:0051656	establishment of organelle localization	15/399	448/17913	0.0774218	0.203278	0.144031	SERPINA1/FGR/FCER1G/CTNNB1/LRRK2/ADGRE2/EZR/HIF1A/LYN/AREG/F5/MYH9/PRKCB/STXBP2/RAB27A	15	M1
GO:0034765	regulation of ion transmembrane transport	15/399	453/17913	0.0831855	0.212018	0.150224	CTSS/PPIF/FLNA/CORO1A/OXSR1/PDE4B/CYBB/THBS1/AHNAK/TGFB1/LYN/TCIRG1/FYN/ATP1B3/DIAPH1	15	M1
GO:0016311	dephosphorylation	15/399	458/17913	0.089219	0.221305	0.156804	PTPRC/LILRB2/PTPRE/DUSP1/TGFB1/CPPED1/PPP1R15A/DUSP6/PFKFB3/PHACTR1/PLEK/PPP1R15B/DUSP2/PTP4A2/IQGAP1	15	M1
GO:0071621	granulocyte chemotaxis	14/399	84/17913	4.54e-09	4.12e-07	2.92e-07	JAML/C5AR1/S100A12/ITGB2/CXCL8/CSF3R/PDE4B/S100A9/THBS1/ADGRE2/RIPOR2/S100A8/BST1/CXCL3	14	M1
GO:0007229	integrin-mediated signaling pathway	14/399	94/17913	2.04e-08	1.28e-06	9.04e-07	TIMP1/ITGAX/ITGB2/FGR/FLNA/FCER1G/ITGAM/ITGB1/PLEK/FERMT3/BST1/MYH9/NEDD9/ITGA5	14	M1
GO:0042116	macrophage activation	14/399	96/17913	2.69e-08	1.53e-06	1.09e-06	NAMPT/SLC11A1/C5AR1/PTPRC/ITGB2/CD93/THBS1/TLR2/LRRK2/ITGAM/ZC3H12A/JMJD6/FPR2/IL6	14	M1
GO:0002576	platelet degranulation	14/399	128/17913	1.02e-06	3.21e-05	2.28e-05	SERPINA1/TIMP1/VEGFA/FLNA/FCER1G/THBS1/TGFB1/APLP2/LYN/F5/PLEK/FERMT3/QSOX1/STXBP2	14	M1
GO:0002822	regulation of adaptive immune response based on somatic recombination of immune receptors built from immunoglobulin superfamily domains	14/399	135/17913	1.95e-06	5.66e-05	4.01e-05	SLC11A1/PTPRC/TNFRSF1B/NLRP3/IL1B/FCER1G/RIPK2/TGFB1/NFKBIZ/TNFAIP3/MALT1/ZC3H12A/SASH3/IL6	14	M1
GO:0045580	regulation of T cell differentiation	14/399	139/17913	2.76e-06	7.61e-05	5.39e-05	PTPRC/NLRP3/LILRB2/RIPK2/TGFB1/NFKBIZ/ADAM8/PNP/RARA/VSIR/CD86/MALT1/ZC3H12A/SASH3	14	M1
GO:2001242	regulation of intrinsic apoptotic signaling pathway	14/399	163/17913	1.76e-05	0.000356653	0.000252704	CD44/PLAUR/PTGS2/SOD2/PPIF/MCL1/S100A9/LRRK2/BID/SKIL/IVNS1ABP/S100A8/HIF1A/SNAI1	14	M1
GO:0001959	regulation of cytokine-mediated signaling pathway	14/399	170/17913	2.82e-05	0.000535304	0.000379286	PTPRC/CARD16/CASP1/RIPK2/SOCS3/IFNGR2/TNFAIP3/IL1RN/HIF1A/IFNGR1/BIRC3/IL1R2/ADAM17/IL6	14	M1
GO:0043281	regulation of cysteine-type endopeptidase activity involved in apoptotic process	14/399	196/17913	0.000132166	0.00197141	0.00139683	CD44/PLAUR/PTGS2/NLRP3/VEGFA/SERPINB9/CARD16/CTSH/CASP1/S100A9/THBS1/S100A8/TNFRSF10B/F3	14	M1
GO:0034329	cell junction assembly	14/399	214/17913	0.000328505	0.00413655	0.00293093	VEGFA/FLNA/S100A10/LIMS1/CTNNB1/THBS1/VASP/PLEC/VMP1/LAMB3/MAP4K4/SNAI1/ITGA5/IQGAP1	14	M1
GO:0033157	regulation of intracellular protein transport	14/399	220/17913	0.000434319	0.00524606	0.00371706	PTGS2/IL1B/ITGB2/FLNA/TGFB1/LRRK2/ITGAM/NDEL1/PLK3/FYN/GRASP/ZC3H12A/LCP1/INSIG1	14	M1
GO:0001649	osteoblast differentiation	14/399	222/17913	0.000475507	0.00560644	0.0039724	VCAN/CTNNB1/H3F3A/AREG/TCIRG1/CEBPB/DDX5/DDX21/TPM4/SNAI1/IL6R/JUNB/CLEC5A/IL6	14	M1
GO:0071356	cellular response to tumor necrosis factor	14/399	266/17913	0.00266779	0.0193764	0.013729	TNFRSF1B/CXCL8/LIMS1/CARD16/CASP1/NFKBIA/THBS1/FOXO3/GBP2/TNFAIP3/NFKB1/BIRC3/ZC3H12A/ADAM17	14	M1
GO:0051403	stress-activated MAPK cascade	14/399	271/17913	0.00315538	0.0222276	0.0157492	IL1B/VEGFA/MAP3K8/DUSP1/RIPK2/MAP3K2/EZR/NCF1/NFKB1/ZEB2/MAP4K4/ZC3H12A/TRIB1/MAP2K3	14	M1
GO:0006959	humoral immune response	14/399	276/17913	0.00371368	0.0246378	0.0174569	FCN1/SLC11A1/C5AR1/CD55/PTPRC/TREM1/CFP/IL1B/S100A12/S100A9/S100A8/POU2F2/BST1/IL6	14	M1
GO:0042063	gliogenesis	14/399	285/17913	0.00492046	0.0301258	0.0213454	C5AR1/TNFRSF1B/IL1B/CTNNB1/TLR2/TGFB1/TSPO/S100A8/LYN/AREG/VIM/STAT3/FPR2/IL6	14	M1
GO:0015849	organic acid transport	14/399	293/17913	0.00624256	0.0360366	0.0255335	SLC11A1/IL1B/SLC43A2/AQP9/PNPLA8/ACSL1/SLC7A7/THBS1/SLC7A5/PRKAG2/RXRA/SLC16A3/PLIN2/ACSL3	14	M1
GO:0046942	carboxylic acid transport	14/399	293/17913	0.00624256	0.0360366	0.0255335	SLC11A1/IL1B/SLC43A2/AQP9/PNPLA8/ACSL1/SLC7A7/THBS1/SLC7A5/PRKAG2/RXRA/SLC16A3/PLIN2/ACSL3	14	M1
GO:0071214	cellular response to abiotic stimulus	14/399	310/17913	0.00999592	0.0498852	0.0353458	NAMPT/PTGS2/IL1B/CARD16/OXSR1/CASP1/MYD88/MAP3K2/TGFB1/CDKN1A/TSPO/RIPOR2/NFKB1/TNFRSF10B	14	M1
GO:0104004	cellular response to environmental stimulus	14/399	310/17913	0.00999592	0.0498852	0.0353458	NAMPT/PTGS2/IL1B/CARD16/OXSR1/CASP1/MYD88/MAP3K2/TGFB1/CDKN1A/TSPO/RIPOR2/NFKB1/TNFRSF10B	14	M1
GO:0006874	cellular calcium ion homeostasis	14/399	375/17913	0.0421811	0.13724	0.0972408	ATP2B1/CD55/PTPRC/CD52/CORO1A/TGFB1/LYN/TCIRG1/FYN/ANXA2/PRKCB/DIAPH1/ADM/PROK2	14	M1
GO:0055074	calcium ion homeostasis	14/399	388/17913	0.0531853	0.160386	0.11364	ATP2B1/CD55/PTPRC/CD52/CORO1A/TGFB1/LYN/TCIRG1/FYN/ANXA2/PRKCB/DIAPH1/ADM/PROK2	14	M1
GO:0044282	small molecule catabolic process	14/399	404/17913	0.0692561	0.188861	0.133816	CD44/TYMP/UPP1/GK/KYNU/TGFB1/PNP/APOBEC3A/PADI4/ADA2/HK2/GK5/CDA/CYP4F3	14	M1
GO:0043254	regulation of protein complex assembly	14/399	409/17913	0.0748737	0.197868	0.140198	VEGFA/CORO1A/CTNNB1/TGFB1/MSN/VASP/BID/H3F3A/WARS/CAPG/PLEK/MYADM/LCP1/INSIG1	14	M1
GO:0060249	anatomical structure homeostasis	14/399	413/17913	0.0795763	0.205172	0.145373	ATP2B1/VEGFA/CORO1A/CTSH/CTNNB1/TGFB1/ADAM8/TNFAIP3/HIF1A/TCIRG1/LPCAT1/NAF1/SASH3/IL6	14	M1
GO:0048667	cell morphogenesis involved in neuron differentiation	14/399	500/17913	0.226996	0.414714	0.293843	S100A6/VEGFA/C9orf72/LRRK2/VASP/SKIL/NDEL1/EZR/RIPOR2/ITGB1/NUMB/ZEB2/FYN/DOCK10	14	M1
GO:0032623	interleukin-2 production	13/399	62/17913	8.46e-10	9.89e-08	7.01e-08	SLC11A1/PTPRC/IL1B/FCER1G/PDE4B/RIPK2/PNP/TNFAIP3/EZR/CD86/MALT1/IL1A/SASH3	13	M1
GO:1990266	neutrophil migration	13/399	72/17913	5.9e-09	4.95e-07	3.51e-07	JAML/C5AR1/S100A12/ITGB2/CXCL8/CSF3R/PDE4B/S100A9/ADAM8/RIPOR2/S100A8/BST1/CXCL3	13	M1
GO:0032755	positive regulation of interleukin-6 production	13/399	81/17913	2.61e-08	1.5e-06	1.07e-06	IL1B/EREG/LILRB2/LILRA5/FCER1G/MYD88/RIPK2/TLR2/AKIRIN2/SELENOK/STAT3/IL6R/IL6	13	M1
GO:1903557	positive regulation of tumor necrosis factor superfamily cytokine production	13/399	81/17913	2.61e-08	1.5e-06	1.07e-06	PTPRC/LILRA5/FCER1G/CYBB/RIPK2/THBS1/TLR2/CD14/LRRK2/ADAM8/SELENOK/CD86/SASH3	13	M1
GO:0045582	positive regulation of T cell differentiation	13/399	83/17913	3.53e-08	1.94e-06	1.37e-06	PTPRC/NLRP3/LILRB2/RIPK2/TGFB1/NFKBIZ/ADAM8/PNP/RARA/VSIR/CD86/MALT1/SASH3	13	M1
GO:0001776	leukocyte homeostasis	13/399	84/17913	4.09e-08	2.11e-06	1.5e-06	FCER1G/CORO1A/PDE4B/TGFB1/SKIL/TNFAIP3/HIF1A/LYN/TCIRG1/DOCK10/ADAM17/HCAR2/IL6	13	M1
GO:0035710	CD4-positive, alpha-beta T cell activation	13/399	90/17913	9.52e-08	4.19e-06	2.97e-06	CD55/NLRP3/RIPK2/NFKBIZ/RARA/VSIR/CD86/TCIRG1/MALT1/STAT3/ZC3H12A/SASH3/IL6	13	M1
GO:0045621	positive regulation of lymphocyte differentiation	13/399	93/17913	1.41e-07	5.99e-06	4.24e-06	PTPRC/NLRP3/LILRB2/RIPK2/TGFB1/NFKBIZ/ADAM8/PNP/RARA/VSIR/CD86/MALT1/SASH3	13	M1
GO:0002367	cytokine production involved in immune response	13/399	101/17913	3.79e-07	1.48e-05	1.05e-05	SLC11A1/CD55/TNFRSF1B/NLRP3/IL1B/FCER1G/TLR2/TGFB1/MALT1/DDX21/FFAR2/SASH3/IL6	13	M1
GO:2000379	positive regulation of reactive oxygen species metabolic process	13/399	101/17913	3.79e-07	1.48e-05	1.05e-05	PTGS2/IL1B/ITGB2/THBS1/TGFB1/FOXO3/CDKN1A/ITGAM/TSPO/ZC3H12A/PTX3/FPR2/RAB27A	13	M1
GO:0002688	regulation of leukocyte chemotaxis	13/399	105/17913	5.98e-07	2.16e-05	1.53e-05	C5AR1/CXCL8/DUSP1/OXSR1/GPSM3/THBS1/RIPOR2/LYN/BST1/IL6R/ADAM17/FPR2/IL6	13	M1
GO:0042035	regulation of cytokine biosynthetic process	13/399	110/17913	1.03e-06	3.21e-05	2.28e-05	PTPRC/IL1B/EREG/CYBB/THBS1/CD86/NFKB1/CEBPB/IL1A/STAT3/MAP2K3/INHBA/IL6	13	M1
GO:0042089	cytokine biosynthetic process	13/399	120/17913	2.77e-06	7.61e-05	5.39e-05	PTPRC/IL1B/EREG/CYBB/THBS1/CD86/NFKB1/CEBPB/IL1A/STAT3/MAP2K3/INHBA/IL6	13	M1
GO:0042107	cytokine metabolic process	13/399	121/17913	3.05e-06	8.31e-05	5.89e-05	PTPRC/IL1B/EREG/CYBB/THBS1/CD86/NFKB1/CEBPB/IL1A/STAT3/MAP2K3/INHBA/IL6	13	M1
GO:1903409	reactive oxygen species biosynthetic process	13/399	122/17913	3.34e-06	8.95e-05	6.34e-05	PTGS2/IL1B/ITGB2/CYBB/GCH1/CYP1B1/FOXO3/TSPO/FYN/STAT3/ZC3H12A/PTX3/RAB27A	13	M1
GO:0050921	positive regulation of chemotaxis	13/399	130/17913	6.78e-06	0.000159465	0.000112988	C5AR1/VEGFA/CXCL8/OXSR1/GPSM3/THBS1/TGFB1/RIPOR2/IL6R/ADAM17/FPR2/F3/IL6	13	M1
GO:0042542	response to hydrogen peroxide	13/399	144/17913	2.06e-05	0.000406917	0.000288318	PPIF/KDM6B/DUSP1/CYP1B1/LRRK2/FOXO3/TNFAIP3/AREG/FYN/PPP1R15B/CAPN2/HP/IL6	13	M1
GO:0002262	myeloid cell homeostasis	13/399	145/17913	2.22e-05	0.000430474	0.00030501	VEGFA/FCER1G/PDE4B/MAFB/FOXO3/HIF1A/LYN/STAT3/ADAM17/JMJD6/HCAR2/INHBA/IL6	13	M1
GO:0002224	toll-like receptor signaling pathway	13/399	147/17913	2.57e-05	0.0004916	0.00034832	CTSS/ITGB2/S100A9/MYD88/RIPK2/NFKBIA/TLR2/CD14/ITGAM/TNFAIP3/S100A8/LYN/BIRC3	13	M1
GO:2001236	regulation of extrinsic apoptotic signaling pathway	13/399	151/17913	3.41e-05	0.00062596	0.00044352	G0S2/PTPRC/IL1B/MCL1/THBS1/BID/SKIL/TNFAIP3/ITPRIP/IL1A/FYN/TNFRSF10B/INHBA	13	M1
GO:0010950	positive regulation of endopeptidase activity	13/399	161/17913	6.64e-05	0.00108558	0.000769182	NLRP3/CTSH/CASP1/S100A9/RIPK2/AKIRIN2/S100A8/LYN/VSIR/FYN/STAT3/TNFRSF10B/F3	13	M1
GO:0010634	positive regulation of epithelial cell migration	13/399	173/17913	0.000137861	0.00203585	0.00144249	PTGS2/VEGFA/HBEGF/CTSH/THBS1/TGFB1/IQSEC1/HIF1A/GLIPR2/MAP4K4/ZC3H12A/ADAM17/MAP2K3	13	M1
GO:1901136	carbohydrate derivative catabolic process	13/399	176/17913	0.00016368	0.00234696	0.00166292	CD44/VCAN/TYMP/UPP1/PDE4B/PDE4A/TGFB1/PNP/AOAH/APOBEC3A/ADA2/CDA/HGSNAT	13	M1
GO:0038061	NIK/NF-kappaB signaling	13/399	179/17913	0.000193553	0.00268857	0.00190497	NLRP3/IL1B/LIMS1/NFKBIA/TLR2/CD14/LITAF/NFKB2/MALT1/BIRC3/TNFRSF10B/ZC3H12A/NFAT5	13	M1
GO:0010952	positive regulation of peptidase activity	13/399	180/17913	0.000204498	0.00279617	0.00198121	NLRP3/CTSH/CASP1/S100A9/RIPK2/AKIRIN2/S100A8/LYN/VSIR/FYN/STAT3/TNFRSF10B/F3	13	M1
GO:0050866	negative regulation of cell activation	13/399	187/17913	0.000297049	0.00379421	0.00268836	SAMSN1/PTPRC/LILRB2/LST1/TGFB1/TNFAIP3/MNDA/RIPOR2/VSIR/CEBPB/ZC3H12A/THBD/INHBA	13	M1
GO:1903531	negative regulation of secretion by cell	13/399	202/17913	0.000620498	0.00694739	0.00492252	TNFRSF1B/NLRP3/IL1B/LILRA5/CARD16/PIM3/TNFAIP3/EZR/OSM/IL1R2/MAP4K4/ZC3H12A/INHBA	13	M1
GO:0051048	negative regulation of secretion	13/399	226/17913	0.00172982	0.014426	0.0102214	TNFRSF1B/NLRP3/IL1B/LILRA5/CARD16/PIM3/TNFAIP3/EZR/OSM/IL1R2/MAP4K4/ZC3H12A/INHBA	13	M1
GO:0031348	negative regulation of defense response	13/399	237/17913	0.00262322	0.019305	0.0136784	PTPRC/TNFRSF1B/NLRP3/METRNL/SERPINB9/SOCS3/FGL2/TNFAIP3/NFKB1/IL1R2/ZC3H12A/FPR2/TNFAIP6	13	M1
GO:0072659	protein localization to plasma membrane	13/399	237/17913	0.00262322	0.019305	0.0136784	FLNA/FCER1G/S100A10/TGFB1/RILPL2/EZR/ITGB1/NUMB/RAB31/MYADM/GRASP/ATP1B3/ACSL3	13	M1
GO:0031330	negative regulation of cellular catabolic process	13/399	244/17913	0.00336695	0.0227795	0.0161402	TIMP1/NAMPT/SLC11A1/MCL1/MYD88/LRRK2/TSPO/STAT3/RYBP/ANXA2/NAF1/QSOX1/HP	13	M1
GO:0051924	regulation of calcium ion transport	13/399	244/17913	0.00336695	0.0227795	0.0161402	ATP2B1/PTGS2/LILRB2/LILRA5/CORO1A/PDE4B/CTNNB1/AHNAK/TGFB1/TSPO/LYN/FYN/DIAPH1	13	M1
GO:0009108	coenzyme biosynthetic process	13/399	245/17913	0.00348596	0.0234419	0.0166096	NAMPT/PTGS2/ACSL1/GCH1/KYNU/PNP/HIF1A/PFKFB3/PRKAG2/STAT3/RANBP2/ACSL3/HK2	13	M1
GO:0032868	response to insulin	13/399	252/17913	0.00441806	0.0277377	0.0196533	ATP2B1/IL1B/PTPRE/SYAP1/TLR2/NDEL1/LYN/TCIRG1/RAB31/ATP6V0D1/ATP6V1B2/PRKCB/ADM	13	M1
GO:0051146	striated muscle cell differentiation	13/399	263/17913	0.00627957	0.0361519	0.0256152	VEGFA/EHD1/KDM6B/TGFB1/SPAG9/CD53/AKAP13/RIPOR2/RARA/ITGB1/MYH9/CAPN2/RXRA	13	M1
GO:0043491	protein kinase B signaling	13/399	268/17913	0.00730998	0.040414	0.0286351	IL1B/EREG/HBEGF/THBS1/TGFB1/ADAM8/ITGB1/AREG/PLK3/CD86/OSM/FYN/F3	13	M1
GO:0007162	negative regulation of cell adhesion	13/399	271/17913	0.00798974	0.0428868	0.0303872	PTPRC/LILRB2/DUSP1/THBS1/CYP1B1/TGFB1/IL1RN/RIPOR2/VSIR/CEBPB/MYADM/MAP4K4/ZC3H12A	13	M1
GO:1990778	protein localization to cell periphery	13/399	276/17913	0.00923253	0.047334	0.0335382	FLNA/FCER1G/S100A10/TGFB1/RILPL2/EZR/ITGB1/NUMB/RAB31/MYADM/GRASP/ATP1B3/ACSL3	13	M1
GO:0070371	ERK1 and ERK2 cascade	13/399	289/17913	0.0131779	0.0614003	0.0435048	CD44/C5AR1/PTPRC/IL1B/DUSP1/CTSH/RIPK2/TGFB1/EZR/LYN/DUSP6/GLIPR2/FPR2	13	M1
GO:0010632	regulation of epithelial cell migration	13/399	294/17913	0.0150007	0.0681782	0.0483072	PTGS2/VEGFA/HBEGF/CTSH/THBS1/TGFB1/IQSEC1/HIF1A/GLIPR2/MAP4K4/ZC3H12A/ADAM17/MAP2K3	13	M1
GO:0046879	hormone secretion	13/399	301/17913	0.0178691	0.0771897	0.0546922	IL1B/PIM3/IL1RN/HIF1A/LYN/TCIRG1/OSM/MAP4K4/FFAR2/HCAR2/ADM/INHBA/IL6	13	M1
GO:0009914	hormone transport	13/399	311/17913	0.0226629	0.0905903	0.0641872	IL1B/PIM3/IL1RN/HIF1A/LYN/TCIRG1/OSM/MAP4K4/FFAR2/HCAR2/ADM/INHBA/IL6	13	M1
GO:1904062	regulation of cation transmembrane transport	13/399	312/17913	0.0231902	0.0920338	0.0652099	CTSS/PPIF/FLNA/CORO1A/OXSR1/PDE4B/AHNAK/TGFB1/LYN/TCIRG1/FYN/ATP1B3/DIAPH1	13	M1
GO:0007015	actin filament organization	13/399	325/17913	0.0309011	0.11086	0.078549	FLNA/S100A10/CORO1A/C9orf72/VASP/EZR/PHACTR1/CAPG/PLEK/MYADM/NEDD9/LCP1/DIAPH1	13	M1
GO:0032970	regulation of actin filament-based process	13/399	341/17913	0.0427576	0.137339	0.0973108	FLNA/S100A10/CORO1A/C9orf72/PDE4B/TGFB1/VASP/AKAP13/CAPG/PLEK/BST1/MYH9/MYADM	13	M1
GO:0009100	glycoprotein metabolic process	13/399	369/17913	0.0705763	0.191171	0.135453	VCAN/SULF2/HBEGF/CTNNB1/TET2/B4GALT1/PHLDA1/DSE/HIF1A/CSGALNACT2/ASGR1/PTX3/AGO2	13	M1
GO:0030900	forebrain development	13/399	371/17913	0.0729313	0.194003	0.13746	BCL2A1/KDM6B/FLNA/CTNNB1/LRRK2/ITGAM/NDEL1/RARA/HIF1A/NUMB/ZEB2/FYN/INHBA	13	M1
GO:0072594	establishment of protein localization to organelle	13/399	452/17913	0.210402	0.403392	0.285821	PTGS2/FLNA/NFKBIA/TGFB1/LRRK2/BID/CDKN1A/TNFAIP3/TSPO/STAT3/RANBP2/ZC3H12A/HK2	13	M1
GO:0007264	small GTPase mediated signal transduction	13/399	465/17913	0.239358	0.42104	0.298325	FGD4/SPATA13/CDKN1A/AKAP13/IQSEC1/RIPOR2/LYN/ITGB1/DOCK10/DOCK8/MAP4K4/ARHGAP26/TAGAP	13	M1
GO:0030593	neutrophil chemotaxis	12/399	60/17913	6.75e-09	5.26e-07	3.73e-07	JAML/C5AR1/S100A12/ITGB2/CXCL8/CSF3R/PDE4B/S100A9/RIPOR2/S100A8/BST1/CXCL3	12	M1
GO:0150076	neuroinflammatory response	12/399	76/17913	1.09e-07	4.68e-06	3.32e-06	NAMPT/C5AR1/PTPRC/PTGS2/TNFRSF1B/IL1B/ITGB2/TLR2/LRRK2/ITGAM/FPR2/IL6	12	M1
GO:0002456	T cell mediated immunity	12/399	88/17913	5.65e-07	2.07e-05	1.47e-05	SLC11A1/CD55/PTPRC/TNFRSF1B/NLRP3/IL1B/CTSH/MYO1G/MALT1/SASH3/RAB27A/IL6	12	M1
GO:0046634	regulation of alpha-beta T cell activation	12/399	90/17913	7.24e-07	2.46e-05	1.74e-05	CD55/PTPRC/NLRP3/RIPK2/NFKBIZ/PNP/RARA/VSIR/CD86/MALT1/ZC3H12A/SASH3	12	M1
GO:0002705	positive regulation of leukocyte mediated immunity	12/399	117/17913	1.18e-05	0.000248604	0.000176147	PTPRC/NLRP3/IL1B/ITGB2/FGR/FCER1G/TGFB1/ITGAM/MALT1/DDX21/SASH3/IL6	12	M1
GO:0008360	regulation of cell shape	12/399	124/17913	2.13e-05	0.000419381	0.000297149	ITGB2/VEGFA/FGR/FMNL1/CORO1A/FGD4/LST1/MSN/EZR/FYN/MYH9/DIAPH1	12	M1
GO:0070665	positive regulation of leukocyte proliferation	12/399	134/17913	4.62e-05	0.000811972	0.000575317	CD55/PTPRC/IL1B/LILRB2/CORO1A/RIPK2/CDKN1A/PNP/SELENOK/LYN/SASH3/IL6	12	M1
GO:0071346	cellular response to interferon-gamma	12/399	153/17913	0.000165828	0.00236251	0.00167394	CD44/IFI30/HLA-C/CASP1/HLA-B/SOCS3/TLR2/IFNGR2/GBP2/VIM/IFNGR1/STXBP2	12	M1
GO:0031960	response to corticosteroid	12/399	155/17913	0.000187335	0.00261856	0.00185536	ATP2B1/PTGS2/DUSP1/CYBB/TGFB1/FOXO3/CDKN1A/AKAP13/IL1RN/AREG/ADM/IL6	12	M1
GO:0002695	negative regulation of leukocyte activation	12/399	163/17913	0.000298819	0.00380587	0.00269663	SAMSN1/PTPRC/LILRB2/LST1/TGFB1/TNFAIP3/MNDA/RIPOR2/VSIR/CEBPB/ZC3H12A/INHBA	12	M1
GO:0048660	regulation of smooth muscle cell proliferation	12/399	172/17913	0.000487065	0.00569738	0.00403684	NAMPT/PTGS2/SOD2/EREG/HBEGF/CTNNB1/THBS1/CDKN1A/TNFAIP3/TRIB1/IL6R/IL6	12	M1
GO:1903034	regulation of response to wounding	12/399	173/17913	0.000513093	0.00597041	0.0042303	PLAUR/HBEGF/THBS1/CDKN1A/TNFAIP3/NDEL1/LYN/PLEK/MYH9/SERPINB2/THBD/F3	12	M1
GO:0048659	smooth muscle cell proliferation	12/399	174/17913	0.000540282	0.0062378	0.00441975	NAMPT/PTGS2/SOD2/EREG/HBEGF/CTNNB1/THBS1/CDKN1A/TNFAIP3/TRIB1/IL6R/IL6	12	M1
GO:0043112	receptor metabolic process	12/399	177/17913	0.000629225	0.0070274	0.00497921	ITGB2/VEGFA/FCER1G/CXCL8/TGFB1/EZR/HIF1A/ITGB1/NUMB/RAB31/ANXA2/ADM	12	M1
GO:2001235	positive regulation of apoptotic signaling pathway	12/399	178/17913	0.000661474	0.007242	0.00513127	G0S2/PLAUR/PTPRC/PPIF/CTSH/MCL1/S100A9/THBS1/BID/SKIL/S100A8/INHBA	12	M1
GO:0019362	pyridine nucleotide metabolic process	12/399	179/17913	0.000695097	0.00751753	0.00532649	NAMPT/PTGS2/KYNU/PNP/HIF1A/PFKFB3/PRKAG2/STAT3/BST1/TKT/RANBP2/HK2	12	M1
GO:0046496	nicotinamide nucleotide metabolic process	12/399	179/17913	0.000695097	0.00751753	0.00532649	NAMPT/PTGS2/KYNU/PNP/HIF1A/PFKFB3/PRKAG2/STAT3/BST1/TKT/RANBP2/HK2	12	M1
GO:0072524	pyridine-containing compound metabolic process	12/399	184/17913	0.000885456	0.00904793	0.00641085	NAMPT/PTGS2/KYNU/PNP/HIF1A/PFKFB3/PRKAG2/STAT3/BST1/TKT/RANBP2/HK2	12	M1
GO:0051224	negative regulation of protein transport	12/399	189/17913	0.00111744	0.0106937	0.00757698	NLRP3/IL1B/LILRA5/CARD16/LRRK2/PIM3/TNFAIP3/EZR/IL1R2/MAP4K4/ZC3H12A/INSIG1	12	M1
GO:0006733	oxidoreduction coenzyme metabolic process	12/399	192/17913	0.00127939	0.0118724	0.00841212	NAMPT/PTGS2/KYNU/PNP/HIF1A/PFKFB3/PRKAG2/STAT3/BST1/TKT/RANBP2/HK2	12	M1
GO:1904950	negative regulation of establishment of protein localization	12/399	193/17913	0.00133751	0.0121828	0.00863205	NLRP3/IL1B/LILRA5/CARD16/LRRK2/PIM3/TNFAIP3/EZR/IL1R2/MAP4K4/ZC3H12A/INSIG1	12	M1
GO:0046890	regulation of lipid biosynthetic process	12/399	195/17913	0.0014603	0.0129772	0.00919492	PTGS2/IL1B/TSPO/NFKB1/PRKAG2/LPCAT1/CAPN2/ACSL3/SNAI1/INSIG1/FPR2/ADM	12	M1
GO:0050679	positive regulation of epithelial cell proliferation	12/399	199/17913	0.00173388	0.0144328	0.0102263	JAML/C5AR1/VEGFA/CTNNB1/TGFB1/B4GALT1/TNFAIP3/HIF1A/AREG/STAT3/ADAM17/F3	12	M1
GO:0009612	response to mechanical stimulus	12/399	200/17913	0.00180849	0.0147875	0.0104776	PTGS2/IL1B/CASP1/MYD88/NFKBIA/THBS1/MAP3K2/TGFB1/RIPOR2/NFKB1/FYN/TNFRSF10B	12	M1
GO:1901215	negative regulation of neuron death	12/399	207/17913	0.00240792	0.0182649	0.0129414	C5AR1/SOD2/TNFRSF1B/CORO1A/CTNNB1/REL/LRRK2/ADAM8/HIF1A/CEBPB/FYN/STAT3	12	M1
GO:0034404	nucleobase-containing small molecule biosynthetic process	12/399	211/17913	0.00281748	0.0203196	0.0143973	TYMP/UPP1/PDE4B/PDE4A/PNP/HIF1A/PFKFB3/PRKAG2/STAT3/RANBP2/HK2/CDA	12	M1
GO:0010001	glial cell differentiation	12/399	212/17913	0.00292824	0.0208925	0.0148033	C5AR1/TNFRSF1B/IL1B/CTNNB1/TLR2/TGFB1/S100A8/LYN/VIM/STAT3/FPR2/IL6	12	M1
GO:0006469	negative regulation of protein kinase activity	12/399	222/17913	0.00424242	0.0268626	0.0190333	PTPRC/IL1B/DUSP1/SOCS3/CDKN1A/TNFAIP3/WARS/ITPRIP/LYN/DUSP6/PRKAG2/TRIB1	12	M1
GO:0034504	protein localization to nucleus	12/399	223/17913	0.00439635	0.0276508	0.0195918	PTGS2/FLNA/NFKBIA/TGFB1/LRRK2/GBP2/CDKN1A/RASSF5/FYN/STAT3/RANBP2/ZC3H12A	12	M1
GO:0009743	response to carbohydrate	12/399	224/17913	0.00455473	0.0285118	0.0202019	NAMPT/PTGS2/IL1B/CLEC7A/THBS1/TGFB1/PIM3/FOXO3/HIF1A/LYN/MAP4K4/PRKCB	12	M1
GO:0051607	defense response to virus	12/399	231/17913	0.00579554	0.0341208	0.024176	PTPRC/NLRP3/IL1B/FLNA/FGL2/TNFAIP3/SELENOK/DDX21/APOBEC3A/BIRC3/ZC3H12A/IL6	12	M1
GO:0097305	response to alcohol	12/399	232/17913	0.0059928	0.0347754	0.0246399	ATP2B1/CTNNB1/CYBB/CD14/TGFB1/FOXO3/CDKN1A/S100A8/RARA/FYN/STAT3/INHBA	12	M1
GO:0071453	cellular response to oxygen levels	12/399	237/17913	0.00706033	0.039278	0.0278302	NAMPT/PTGS2/MALAT1/VEGFA/CARD16/CYBB/FOXO3/ADAM8/BACH1/HIF1A/PLK3/ATP6V0D1	12	M1
GO:0051402	neuron apoptotic process	12/399	238/17913	0.00729077	0.040358	0.0285954	C5AR1/SOD2/CORO1A/MCL1/CTNNB1/FOXO3/BID/ITGAM/ADAM8/HIF1A/CEBPB/FYN	12	M1
GO:0033673	negative regulation of kinase activity	12/399	244/17913	0.00880035	0.0456448	0.0323413	PTPRC/IL1B/DUSP1/SOCS3/CDKN1A/TNFAIP3/WARS/ITPRIP/LYN/DUSP6/PRKAG2/TRIB1	12	M1
GO:0031668	cellular response to extracellular stimulus	12/399	251/17913	0.0108583	0.0528642	0.0374566	NAMPT/ATP2B1/PTPRC/PTGS2/UPP1/CYBB/LRRK2/CDKN1A/LYN/ASGR1/FYN/ZC3H12A	12	M1
GO:0044262	cellular carbohydrate metabolic process	12/399	256/17913	0.0125426	0.0589966	0.0418016	GK/B4GALT1/AOAH/PFKFB3/CSGALNACT2/PLEK/PRKAG2/STAT3/RANBP2/PHLDA2/HK2/GK5	12	M1
GO:0070372	regulation of ERK1 and ERK2 cascade	12/399	271/17913	0.0188094	0.0807023	0.0571811	CD44/C5AR1/PTPRC/IL1B/DUSP1/RIPK2/TGFB1/EZR/LYN/DUSP6/GLIPR2/FPR2	12	M1
GO:0016236	macroautophagy	12/399	272/17913	0.0192978	0.0811357	0.0574882	GABARAPL1/C9orf72/RIPK2/LRRK2/VMP1/HIF1A/TCIRG1/ATP6V0D1/PRKAG2/VPS37B/ATP6V1B2/QSOX1	12	M1
GO:0051348	negative regulation of transferase activity	12/399	272/17913	0.0192978	0.0811357	0.0574882	PTPRC/IL1B/DUSP1/SOCS3/CDKN1A/TNFAIP3/WARS/ITPRIP/LYN/DUSP6/PRKAG2/TRIB1	12	M1
GO:0043542	endothelial cell migration	12/399	275/17913	0.0208199	0.0849812	0.0602129	PTGS2/ITGB2/VEGFA/THBS1/CYP1B1/TGFB1/HIF1A/ITGB1/MYH9/ZC3H12A/ADAM17/MAP2K3	12	M1
GO:0051480	regulation of cytosolic calcium ion concentration	12/399	289/17913	0.029124	0.105334	0.074634	ATP2B1/CD55/PTPRC/CD52/CORO1A/TGFB1/LYN/FYN/ANXA2/DIAPH1/ADM/PROK2	12	M1
GO:0006913	nucleocytoplasmic transport	12/399	302/17913	0.0387725	0.128903	0.0913334	PTGS2/IL1B/FLNA/NFKBIA/TGFB1/LRRK2/CDKN1A/AKAP13/MALT1/STAT3/RANBP2/ZC3H12A	12	M1
GO:0051169	nuclear transport	12/399	305/17913	0.0412851	0.135035	0.0956779	PTGS2/IL1B/FLNA/NFKBIA/TGFB1/LRRK2/CDKN1A/AKAP13/MALT1/STAT3/RANBP2/ZC3H12A	12	M1
GO:0006470	protein dephosphorylation	12/399	313/17913	0.0485371	0.149469	0.105905	PTPRC/LILRB2/PTPRE/DUSP1/TGFB1/CPPED1/PPP1R15A/DUSP6/PHACTR1/PPP1R15B/DUSP2/PTP4A2	12	M1
GO:0009205	purine ribonucleoside triphosphate metabolic process	12/399	314/17913	0.0495013	0.151434	0.107297	PPIF/TGFB1/LRRK2/BID/TSPO/HIF1A/PFKFB3/PRKAG2/STAT3/ATP6V1B2/RANBP2/HK2	12	M1
GO:0009199	ribonucleoside triphosphate metabolic process	12/399	319/17913	0.0545188	0.161773	0.114623	PPIF/TGFB1/LRRK2/BID/TSPO/HIF1A/PFKFB3/PRKAG2/STAT3/ATP6V1B2/RANBP2/HK2	12	M1
GO:0009144	purine nucleoside triphosphate metabolic process	12/399	321/17913	0.0566186	0.16689	0.118249	PPIF/TGFB1/LRRK2/BID/TSPO/HIF1A/PFKFB3/PRKAG2/STAT3/ATP6V1B2/RANBP2/HK2	12	M1
GO:0001655	urogenital system development	12/399	324/17913	0.0598692	0.172352	0.122119	VEGFA/SULF2/CTSH/CTNNB1/TGFB1/LRRK2/BASP1/RARA/RXRA/IL6R/JMJD6/IQGAP1	12	M1
GO:0009161	ribonucleoside monophosphate metabolic process	12/399	331/17913	0.0679307	0.185616	0.131517	PPIF/UPP1/TGFB1/BID/TSPO/HIF1A/PFKFB3/PRKAG2/STAT3/ATP6V1B2/RANBP2/HK2	12	M1
GO:0009141	nucleoside triphosphate metabolic process	12/399	337/17913	0.0753799	0.198969	0.140978	PPIF/TGFB1/LRRK2/BID/TSPO/HIF1A/PFKFB3/PRKAG2/STAT3/ATP6V1B2/RANBP2/HK2	12	M1
GO:0009123	nucleoside monophosphate metabolic process	12/399	349/17913	0.0917951	0.226028	0.160151	PPIF/UPP1/TGFB1/BID/TSPO/HIF1A/PFKFB3/PRKAG2/STAT3/ATP6V1B2/RANBP2/HK2	12	M1
GO:0043687	post-translational protein modification	12/399	360/17913	0.108631	0.253206	0.179407	SERPINA1/TIMP1/VCAN/SOCS3/APLP2/HIF1A/CKAP4/F5/PTP4A2/FBXL5/QSOX1/IL6	12	M1
GO:0014706	striated muscle tissue development	12/399	376/17913	0.13614	0.301968	0.213957	GPCPD1/VEGFA/KDM6B/CTNNB1/TGFB1/AKAP13/RIPOR2/RARA/ITGB1/DDX5/JARID2/RXRA	12	M1
GO:0060537	muscle tissue development	12/399	392/17913	0.167094	0.352508	0.249767	GPCPD1/VEGFA/KDM6B/CTNNB1/TGFB1/AKAP13/RIPOR2/RARA/ITGB1/DDX5/JARID2/RXRA	12	M1
GO:0001558	regulation of cell growth	12/399	396/17913	0.175343	0.365401	0.258902	BTG1/VEGFA/HBEGF/S100A9/TGFB1/CDKN1A/H3F3A/NDEL1/S100A8/ADAM17/CDA/INHBA	12	M1
GO:0006644	phospholipid metabolic process	12/399	402/17913	0.18808	0.384729	0.272597	PLBD1/PNPLA8/GPAT3/FGR/SOCS3/TGFB1/LYN/PLEK/LPCAT1/CAPN2/ACSL3/FPR2	12	M1
GO:0009314	response to radiation	12/399	435/17913	0.265037	0.436692	0.309415	NAMPT/PTPRC/PTGS2/CARD16/DUSP1/NABP1/TGFB1/CDKN1A/HIF1A/ITGB1/PLK3/THBD	12	M1
GO:0061564	axon development	12/399	438/17913	0.272529	0.439547	0.311438	S100A6/VEGFA/C9orf72/VASP/SKIL/TSPO/NDEL1/EZR/ITGB1/NUMB/ZEB2/FYN	12	M1
GO:0034248	regulation of cellular amide metabolic process	12/399	452/17913	0.308346	0.465398	0.329754	THBS1/FOXO3/PPP1R15A/RARA/VIM/PLK3/PPP1R15B/STAT3/RXRA/ZC3H12A/AGO2/IL6	12	M1
GO:0016055	Wnt signaling pathway	12/399	498/17913	0.432021	0.555652	0.393703	SULF2/CTNNB1/TLR2/LRRK2/FOXO3/ATP6AP2/NFKB1/TMEM170B/TLE3/ZEB2/RNF213/AGO2	12	M1
GO:0198738	cell-cell signaling by wnt	12/399	500/17913	0.437473	0.561527	0.397866	SULF2/CTNNB1/TLR2/LRRK2/FOXO3/ATP6AP2/NFKB1/TMEM170B/TLE3/ZEB2/RNF213/AGO2	12	M1
GO:0031663	lipopolysaccharide-mediated signaling pathway	11/399	55/17913	2.9e-08	1.63e-06	1.16e-06	CD55/IL1B/CARD16/RIPK2/NFKBIA/TLR2/TGFB1/TNFAIP3/LYN/MALT1/TRIB1	11	M1
GO:0032760	positive regulation of tumor necrosis factor production	11/399	78/17913	1.19e-06	3.7e-05	2.62e-05	PTPRC/LILRA5/FCER1G/CYBB/RIPK2/THBS1/TLR2/CD14/LRRK2/SELENOK/SASH3	11	M1
GO:0032602	chemokine production	11/399	86/17913	3.19e-06	8.6e-05	6.09e-05	IL1B/S100A9/RIPK2/TLR2/SELENOK/S100A8/HIF1A/IL6R/ADAM17/FFAR2/IL6	11	M1
GO:0002824	positive regulation of adaptive immune response based on somatic recombination of immune receptors built from immunoglobulin superfamily domains	11/399	89/17913	4.49e-06	0.000110868	7.86e-05	SLC11A1/PTPRC/NLRP3/IL1B/FCER1G/RIPK2/TGFB1/NFKBIZ/MALT1/SASH3/IL6	11	M1
GO:0002821	positive regulation of adaptive immune response	11/399	94/17913	7.68e-06	0.000174268	0.000123476	SLC11A1/PTPRC/NLRP3/IL1B/FCER1G/RIPK2/TGFB1/NFKBIZ/MALT1/SASH3/IL6	11	M1
GO:0046632	alpha-beta T cell differentiation	11/399	99/17913	1.27e-05	0.000265067	0.000187811	NLRP3/RIPK2/NFKBIZ/PNP/RARA/CD86/MALT1/STAT3/ZC3H12A/SASH3/IL6	11	M1
GO:0032609	interferon-gamma production	11/399	105/17913	2.23e-05	0.000430679	0.000305154	SLC11A1/IL1B/PDE4B/RIPK2/CD14/RARA/VSIR/TCIRG1/ZC3H12A/SASH3/INHBA	11	M1
GO:1901222	regulation of NIK/NF-kappaB signaling	11/399	114/17913	4.81e-05	0.000829408	0.000587671	NLRP3/IL1B/LIMS1/NFKBIA/TLR2/CD14/LITAF/MALT1/TNFRSF10B/ZC3H12A/NFAT5	11	M1
GO:0002220	innate immune response activating cell surface receptor signaling pathway	11/399	116/17913	5.65e-05	0.000937483	0.000664247	FCN1/FCER1G/CLEC4A/CLEC4E/ICAM3/LYN/NFKB1/MALT1/FYN/FFAR2/CLEC10A	11	M1
GO:0050671	positive regulation of lymphocyte proliferation	11/399	125/17913	0.00011156	0.00169823	0.00120327	CD55/PTPRC/IL1B/LILRB2/CORO1A/RIPK2/CDKN1A/PNP/SELENOK/SASH3/IL6	11	M1
GO:0032946	positive regulation of mononuclear cell proliferation	11/399	126/17913	0.000119834	0.00181797	0.00128811	CD55/PTPRC/IL1B/LILRB2/CORO1A/RIPK2/CDKN1A/PNP/SELENOK/SASH3/IL6	11	M1
GO:0051250	negative regulation of lymphocyte activation	11/399	132/17913	0.00018129	0.00254206	0.00180116	SAMSN1/LILRB2/LST1/TGFB1/TNFAIP3/MNDA/RIPOR2/VSIR/CEBPB/ZC3H12A/INHBA	11	M1
GO:0030260	entry into host cell	11/399	134/17913	0.000206961	0.00279617	0.00198121	FCN1/CD55/ANPEP/CXCL8/CTNNB1/IFITM2/ITGB1/CD86/PTX3/ITGA5/CLEC5A	11	M1
GO:0044409	entry into host	11/399	134/17913	0.000206961	0.00279617	0.00198121	FCN1/CD55/ANPEP/CXCL8/CTNNB1/IFITM2/ITGB1/CD86/PTX3/ITGA5/CLEC5A	11	M1
GO:0051806	entry into cell of other organism involved in symbiotic interaction	11/399	134/17913	0.000206961	0.00279617	0.00198121	FCN1/CD55/ANPEP/CXCL8/CTNNB1/IFITM2/ITGB1/CD86/PTX3/ITGA5/CLEC5A	11	M1
GO:0051828	entry into other organism involved in symbiotic interaction	11/399	134/17913	0.000206961	0.00279617	0.00198121	FCN1/CD55/ANPEP/CXCL8/CTNNB1/IFITM2/ITGB1/CD86/PTX3/ITGA5/CLEC5A	11	M1
GO:0002700	regulation of production of molecular mediator of immune response	11/399	138/17913	0.000267619	0.00354038	0.00250851	PTPRC/TNFRSF1B/NLRP3/IL1B/FCER1G/TGFB1/MALT1/DDX21/FFAR2/SASH3/IL6	11	M1
GO:0051384	response to glucocorticoid	11/399	139/17913	0.000284932	0.00368175	0.00260868	ATP2B1/PTGS2/DUSP1/TGFB1/FOXO3/CDKN1A/AKAP13/IL1RN/AREG/ADM/IL6	11	M1
GO:0045807	positive regulation of endocytosis	11/399	141/17913	0.000322402	0.00408284	0.00289287	SLC11A1/PTPRC/IL1B/VEGFA/CD14/LRRK2/RAB31/ANXA2/PTX3/FPR2/RAB27A	11	M1
GO:0061041	regulation of wound healing	11/399	143/17913	0.000363935	0.00449359	0.0031839	PLAUR/HBEGF/THBS1/CDKN1A/TNFAIP3/LYN/PLEK/MYH9/SERPINB2/THBD/F3	11	M1
GO:0061351	neural precursor cell proliferation	11/399	144/17913	0.000386332	0.00473071	0.00335191	C5AR1/VEGFA/FLNA/CTNNB1/TGFB1/LRRK2/FOXO3/HIF1A/LYN/NUMB/ZEB2	11	M1
GO:0000187	activation of MAPK activity	11/399	147/17913	0.000460583	0.00544493	0.00385797	C5AR1/FPR1/PTPRC/IL1B/RIPK2/THBS1/MAP3K2/LRRK2/DUSP6/MAP2K3/PROK2	11	M1
GO:0030168	platelet activation	11/399	152/17913	0.000610771	0.00685575	0.0048576	FLNA/FCER1G/LCP2/LYN/PLEK/FERMT3/FYN/MYH9/PRKCB/THBD/IL6	11	M1
GO:1901568	fatty acid derivative metabolic process	11/399	154/17913	0.000681311	0.00744085	0.00527216	PTGS2/IL1B/PNPLA8/ACSL1/ALOX5/TLR2/CYP1B1/LTA4H/ACSL3/ALOX5AP/CYP4F3	11	M1
GO:0002673	regulation of acute inflammatory response	11/399	160/17913	0.000934757	0.00948629	0.00672145	C5AR1/CD55/PTGS2/NLRP3/CFP/IL1B/FCER1G/ADAM8/OSM/FFAR2/IL6	11	M1
GO:0050728	negative regulation of inflammatory response	11/399	170/17913	0.00152779	0.013325	0.00944132	PTPRC/TNFRSF1B/NLRP3/METRNL/SOCS3/TNFAIP3/NFKB1/IL1R2/ZC3H12A/FPR2/TNFAIP6	11	M1
GO:0001659	temperature homeostasis	11/399	172/17913	0.00167716	0.0140131	0.0099289	G0S2/PTGS2/IL1B/VEGFA/KDM6B/ACSL1/CEBPB/TLE3/IL1A/STAT3/ADAM17	11	M1
GO:0051897	positive regulation of protein kinase B signaling	11/399	173/17913	0.0017562	0.0145099	0.0102809	EREG/HBEGF/THBS1/TGFB1/ADAM8/ITGB1/AREG/CD86/OSM/FYN/F3	11	M1
GO:0070613	regulation of protein processing	11/399	173/17913	0.0017562	0.0145099	0.0102809	C5AR1/CD55/CFP/IL1B/CARD16/THBS1/LRRK2/ADAM8/CAST/MYH9/IL1R2	11	M1
GO:1903317	regulation of protein maturation	11/399	175/17913	0.00192341	0.0154884	0.0109742	C5AR1/CD55/CFP/IL1B/CARD16/THBS1/LRRK2/ADAM8/CAST/MYH9/IL1R2	11	M1
GO:0007369	gastrulation	11/399	178/17913	0.00219834	0.0170535	0.0120831	ITGB2/KDM6B/ETS2/CTNNB1/IL1RN/ITGB1/LAMB3/MYADM/SNAI1/ITGA5/INHBA	11	M1
GO:0050852	T cell receptor signaling pathway	11/399	180/17913	0.00239874	0.0182575	0.0129362	PTPRC/PDE4B/RIPK2/LCP2/NFKBIZ/FYB1/EZR/NFKB1/MALT1/FYN/ZC3H12A	11	M1
GO:0043901	negative regulation of multi-organism process	11/399	182/17913	0.00261368	0.0192987	0.013674	FCN1/TIMP1/CARD16/IFITM2/FGL2/TNFAIP3/APOBEC3A/ANXA2/ZC3H12A/PTX3/TRIB1	11	M1
GO:0045732	positive regulation of protein catabolic process	11/399	192/17913	0.00393373	0.0258335	0.0183042	TNFRSF1B/IL1B/MSN/LRRK2/ADAM8/TNFAIP3/EZR/PLK3/LPCAT1/FBXL5/TRIB1	11	M1
GO:0010810	regulation of cell-substrate adhesion	11/399	201/17913	0.00553348	0.0327514	0.0232058	VEGFA/FLNA/S100A10/LIMS1/THBS1/BST1/MYADM/NEDD9/MAP4K4/ITGA5/IQGAP1	11	M1
GO:0010951	negative regulation of endopeptidase activity	11/399	210/17913	0.0076075	0.0412382	0.0292191	CD44/TIMP1/PLAUR/PTGS2/VEGFA/SERPINB9/CARD16/THBS1/APLP2/CAST/CSTA	11	M1
GO:0043523	regulation of neuron apoptotic process	11/399	210/17913	0.0076075	0.0412382	0.0292191	C5AR1/SOD2/CORO1A/MCL1/CTNNB1/FOXO3/ITGAM/ADAM8/HIF1A/CEBPB/FYN	11	M1
GO:0007160	cell-matrix adhesion	11/399	214/17913	0.00870407	0.0451981	0.0320248	CD44/ITGB2/VEGFA/S100A10/LIMS1/CTNNB1/THBS1/ITGB1/BST1/MAP4K4/IQGAP1	11	M1
GO:0007584	response to nutrient	11/399	215/17913	0.00899644	0.0462838	0.032794	ATP2B1/PTGS2/IL1B/ACSL1/CYBB/KYNU/TGFB1/TSPO/RARA/FYN/ACSL3	11	M1
GO:0009266	response to temperature stimulus	11/399	219/17913	0.0102426	0.0508695	0.0360432	ATP2B1/PTGS2/METRNL/NFKBIA/THBS1/CD14/CDKN1A/LYN/IL1A/RANBP2/ADM	11	M1
GO:0036294	cellular response to decreased oxygen levels	11/399	220/17913	0.0105739	0.0522814	0.0370436	NAMPT/PTGS2/MALAT1/VEGFA/CARD16/CYBB/FOXO3/ADAM8/BACH1/HIF1A/PLK3	11	M1
GO:0070302	regulation of stress-activated protein kinase signaling cascade	11/399	222/17913	0.0112611	0.0546461	0.0387191	IL1B/VEGFA/DUSP1/RIPK2/MAP3K2/EZR/LYN/NCF1/ZEB2/MAP4K4/ZC3H12A	11	M1
GO:0010466	negative regulation of peptidase activity	11/399	223/17913	0.0116173	0.055947	0.0396409	CD44/TIMP1/PLAUR/PTGS2/VEGFA/SERPINB9/CARD16/THBS1/APLP2/CAST/CSTA	11	M1
GO:1903320	regulation of protein modification by small protein conjugation or removal	11/399	223/17913	0.0116173	0.055947	0.0396409	CTNNB1/RIPK2/LRRK2/IVNS1ABP/TNFAIP3/TSPO/RASSF5/MALT1/FYN/BIRC3/ZC3H12A	11	M1
GO:0046434	organophosphate catabolic process	11/399	224/17913	0.0119821	0.0572692	0.0405777	PNPLA8/UPP1/PDE4B/PDE4A/PNP/HIF1A/PFKFB3/PRKAG2/STAT3/RANBP2/HK2	11	M1
GO:0007050	cell cycle arrest	11/399	231/17913	0.014785	0.0674046	0.0477591	CXCL8/EVI2B/DUSP1/THBS1/TGFB1/SKIL/CDKN1A/PPP1R15A/PLK3/PRKAG2/INHBA	11	M1
GO:0038093	Fc receptor signaling pathway	11/399	241/17913	0.0196116	0.0811357	0.0574882	PTPRC/FGR/FCER1G/CLEC4E/LCP2/MYO1G/LYN/NFKB1/MALT1/FYN/FCER1A	11	M1
GO:0051896	regulation of protein kinase B signaling	11/399	241/17913	0.0196116	0.0811357	0.0574882	EREG/HBEGF/THBS1/TGFB1/ADAM8/ITGB1/AREG/CD86/OSM/FYN/F3	11	M1
GO:0021537	telencephalon development	11/399	246/17913	0.0224218	0.0897072	0.0635614	BCL2A1/KDM6B/FLNA/CTNNB1/LRRK2/NDEL1/RARA/HIF1A/NUMB/ZEB2/INHBA	11	M1
GO:0060485	mesenchyme development	11/399	258/17913	0.0303541	0.108986	0.0772209	S100A4/IL1B/CTNNB1/TGFB1/BASP1/HIF1A/DDX5/ZEB2/GLIPR2/SNAI1/IL6	11	M1
GO:0007548	sex differentiation	11/399	269/17913	0.0392281	0.13032	0.0923376	EREG/VEGFA/FLNA/CTNNB1/FOXO3/BASP1/H3F3A/RARA/CEBPB/PTX3/INHBA	11	M1
GO:0001822	kidney development	11/399	276/17913	0.0457351	0.143873	0.10194	VEGFA/SULF2/CTSH/CTNNB1/TGFB1/LRRK2/BASP1/RARA/IL6R/JMJD6/IQGAP1	11	M1
GO:0003015	heart process	11/399	284/17913	0.0540339	0.160763	0.113908	ATP2B1/FLNA/HBEGF/PDE4B/GCH1/AKAP13/FYN/ZC3H12A/ATP1B3/MAP2K3/ADM	11	M1
GO:0046034	ATP metabolic process	11/399	287/17913	0.05739	0.168716	0.119543	PPIF/TGFB1/BID/TSPO/HIF1A/PFKFB3/PRKAG2/STAT3/ATP6V1B2/RANBP2/HK2	11	M1
GO:0051961	negative regulation of nervous system development	11/399	290/17913	0.0608817	0.174749	0.123817	IL1B/CTNNB1/TLR2/TGFB1/LRRK2/FOXO3/TSPO/VIM/STAT3/MAP4K4/IL6	11	M1
GO:0072001	renal system development	11/399	291/17913	0.062076	0.177135	0.125508	VEGFA/SULF2/CTSH/CTNNB1/TGFB1/LRRK2/BASP1/RARA/IL6R/JMJD6/IQGAP1	11	M1
GO:0032956	regulation of actin cytoskeleton organization	11/399	297/17913	0.0695639	0.189584	0.134329	FLNA/S100A10/CORO1A/C9orf72/TGFB1/VASP/AKAP13/CAPG/PLEK/BST1/MYADM	11	M1
GO:0060562	epithelial tube morphogenesis	11/399	313/17913	0.0922726	0.226228	0.160292	ITGAX/VEGFA/CTSH/CTNNB1/TGFB1/VASP/RARA/HIF1A/AREG/ZEB2/ADM	11	M1
GO:0009167	purine ribonucleoside monophosphate metabolic process	11/399	317/17913	0.0985779	0.237442	0.168238	PPIF/TGFB1/BID/TSPO/HIF1A/PFKFB3/PRKAG2/STAT3/ATP6V1B2/RANBP2/HK2	11	M1
GO:0009126	purine nucleoside monophosphate metabolic process	11/399	318/17913	0.100193	0.239312	0.169563	PPIF/TGFB1/BID/TSPO/HIF1A/PFKFB3/PRKAG2/STAT3/ATP6V1B2/RANBP2/HK2	11	M1
GO:0001505	regulation of neurotransmitter levels	11/399	321/17913	0.105134	0.248017	0.175731	PTGS2/IL1B/ITGB2/GCH1/TLR2/CYP1B1/LRRK2/TSPO/PRKCB/ZC3H12A/PTX3	11	M1
GO:0008202	steroid metabolic process	11/399	321/17913	0.105134	0.248017	0.175731	IL1B/CYP1B1/TSPO/NFKB1/PRKAG2/RXRA/APOBR/SNAI1/INSIG1/ADM/CES1	11	M1
GO:0006066	alcohol metabolic process	11/399	339/17913	0.137696	0.305114	0.216187	IL1B/GK/GCH1/CYP1B1/NFKB1/PLEK/RXRA/APOBR/GK5/INSIG1/CES1	11	M1
GO:0010639	negative regulation of organelle organization	11/399	352/17913	0.164211	0.349076	0.247335	LILRB2/PPIF/CORO1A/DUSP1/LRRK2/H3F3A/TSPO/CAPG/JARID2/MYADM/INSIG1	11	M1
GO:0046486	glycerolipid metabolic process	11/399	385/17913	0.24145	0.423038	0.29974	PLBD1/PNPLA8/GPAT3/ACSL1/GK/PLEK/LPCAT1/CAPN2/ACSL3/INSIG1/FPR2	11	M1
GO:0007409	axonogenesis	11/399	393/17913	0.261981	0.436692	0.309415	S100A6/VEGFA/C9orf72/VASP/SKIL/NDEL1/EZR/ITGB1/NUMB/ZEB2/FYN	11	M1
GO:0006417	regulation of translation	11/399	397/17913	0.272462	0.439547	0.311438	THBS1/FOXO3/PPP1R15A/RARA/VIM/PPP1R15B/STAT3/RXRA/ZC3H12A/AGO2/IL6	11	M1
GO:0010975	regulation of neuron projection development	11/399	458/17913	0.442739	0.561964	0.398176	VEGFA/S100A9/LRRK2/SKIL/NDEL1/LYN/VIM/ZEB2/FYN/MAP4K4/IQGAP1	11	M1
GO:0007005	mitochondrion organization	11/399	466/17913	0.465488	0.580335	0.411192	PLAUR/SOD2/PPIF/TYMP/LRRK2/BID/TSPO/HIF1A/STAT3/TTC19/HK2	11	M1
GO:0015672	monovalent inorganic cation transport	11/399	477/17913	0.496519	0.602395	0.426823	PPIF/FLNA/OXSR1/SLC15A3/TGFB1/C15orf48/SLC2A6/TCIRG1/ATP6V0D1/ATP6V1B2/ATP1B3	11	M1
GO:0032663	regulation of interleukin-2 production	10/399	54/17913	2.68e-07	1.08e-05	7.68e-06	PTPRC/IL1B/PDE4B/RIPK2/TNFAIP3/EZR/CD86/MALT1/IL1A/SASH3	10	M1
GO:0061900	glial cell activation	10/399	59/17913	6.38e-07	2.23e-05	1.58e-05	NAMPT/C5AR1/PTPRC/IL1B/ITGB2/TLR2/LRRK2/ITGAM/FPR2/IL6	10	M1
GO:2000514	regulation of CD4-positive, alpha-beta T cell activation	10/399	59/17913	6.38e-07	2.23e-05	1.58e-05	CD55/NLRP3/RIPK2/NFKBIZ/RARA/VSIR/CD86/MALT1/ZC3H12A/SASH3	10	M1
GO:0034113	heterotypic cell-cell adhesion	10/399	61/17913	8.8e-07	2.88e-05	2.04e-05	CD44/ITGAX/PTPRC/IL1B/ITGB2/LILRB2/IL1RN/ITGB1/MYADM/ITGA5	10	M1
GO:0046635	positive regulation of alpha-beta T cell activation	10/399	61/17913	8.8e-07	2.88e-05	2.04e-05	CD55/PTPRC/NLRP3/RIPK2/NFKBIZ/PNP/RARA/CD86/MALT1/SASH3	10	M1
GO:0006801	superoxide metabolic process	10/399	65/17913	1.61e-06	4.85e-05	3.43e-05	SOD2/NCF2/ITGB2/CYBB/GCH1/TGFB1/ITGAM/NCF1/BST1/FPR2	10	M1
GO:0002292	T cell differentiation involved in immune response	10/399	66/17913	1.86e-06	5.49e-05	3.89e-05	NLRP3/RIPK2/CLEC4E/NFKBIZ/RARA/CD86/MALT1/STAT3/ZC3H12A/IL6	10	M1
GO:0071674	mononuclear cell migration	10/399	68/17913	2.47e-06	6.9e-05	4.89e-05	JAML/C5AR1/S100A12/DUSP1/THBS1/TGFB1/LYN/IL6R/FPR2/IL6	10	M1
GO:0043367	CD4-positive, alpha-beta T cell differentiation	10/399	74/17913	5.42e-06	0.000132333	9.38e-05	NLRP3/RIPK2/NFKBIZ/RARA/CD86/MALT1/STAT3/ZC3H12A/SASH3/IL6	10	M1
GO:0002690	positive regulation of leukocyte chemotaxis	10/399	81/17913	1.23e-05	0.000258656	0.000183269	C5AR1/CXCL8/OXSR1/GPSM3/THBS1/RIPOR2/IL6R/ADAM17/FPR2/IL6	10	M1
GO:0002718	regulation of cytokine production involved in immune response	10/399	83/17913	1.54e-05	0.000317466	0.000224939	TNFRSF1B/NLRP3/IL1B/FCER1G/TGFB1/MALT1/DDX21/FFAR2/SASH3/IL6	10	M1
GO:0042102	positive regulation of T cell proliferation	10/399	90/17913	3.15e-05	0.000582556	0.000412766	CD55/PTPRC/IL1B/LILRB2/CORO1A/RIPK2/PNP/SELENOK/SASH3/IL6	10	M1
GO:0050764	regulation of phagocytosis	10/399	90/17913	3.15e-05	0.000582556	0.000412766	SLC11A1/PTPRC/IL1B/FGR/TLR2/TGFB1/RAB31/PTX3/FPR2/RAB27A	10	M1
GO:0002702	positive regulation of production of molecular mediator of immune response	10/399	93/17913	4.19e-05	0.000744469	0.000527488	PTPRC/NLRP3/IL1B/FCER1G/TGFB1/MALT1/DDX21/FFAR2/SASH3/IL6	10	M1
GO:0032649	regulation of interferon-gamma production	10/399	93/17913	4.19e-05	0.000744469	0.000527488	SLC11A1/IL1B/PDE4B/RIPK2/CD14/RARA/VSIR/ZC3H12A/SASH3/INHBA	10	M1
GO:0030316	osteoclast differentiation	10/399	94/17913	4.59e-05	0.000810349	0.000574167	LILRB3/FCER1G/CTNNB1/MAFB/TGFB1/OSCAR/TCIRG1/CEBPB/ANXA2/JUNB	10	M1
GO:2001243	negative regulation of intrinsic apoptotic signaling pathway	10/399	94/17913	4.59e-05	0.000810349	0.000574167	CD44/PLAUR/PTGS2/SOD2/PPIF/LRRK2/BID/IVNS1ABP/HIF1A/SNAI1	10	M1
GO:0070498	interleukin-1-mediated signaling pathway	10/399	101/17913	8.5e-05	0.00135012	0.000956616	IL1B/MAP3K8/MYD88/RIPK2/NFKBIA/IL1RN/NFKB1/IL1A/IL1R2/IL6	10	M1
GO:1903426	regulation of reactive oxygen species biosynthetic process	10/399	101/17913	8.5e-05	0.00135012	0.000956616	PTGS2/IL1B/ITGB2/FOXO3/TSPO/FYN/STAT3/ZC3H12A/PTX3/RAB27A	10	M1
GO:0002761	regulation of myeloid leukocyte differentiation	10/399	117/17913	0.000288261	0.00370324	0.0026239	LILRB3/EVI2B/CTNNB1/MAFB/TGFB1/RARA/LYN/CEBPB/TRIB1/INHBA	10	M1
GO:0002706	regulation of lymphocyte mediated immunity	10/399	136/17913	0.000946627	0.00956309	0.00677586	PTPRC/TNFRSF1B/NLRP3/IL1B/FCER1G/SERPINB9/TGFB1/MALT1/SASH3/IL6	10	M1
GO:1903305	regulation of regulated secretory pathway	10/399	136/17913	0.000946627	0.00956309	0.00677586	ITGB2/FGR/FCER1G/LRRK2/ITGAM/ADGRE2/LYN/PRKCB/STXBP2/RAB27A	10	M1
GO:0015718	monocarboxylic acid transport	10/399	137/17913	0.00100139	0.00989146	0.00700852	IL1B/AQP9/PNPLA8/ACSL1/THBS1/PRKAG2/RXRA/SLC16A3/PLIN2/ACSL3	10	M1
GO:0050709	negative regulation of protein secretion	10/399	137/17913	0.00100139	0.00989146	0.00700852	NLRP3/IL1B/LILRA5/CARD16/PIM3/TNFAIP3/EZR/IL1R2/MAP4K4/ZC3H12A	10	M1
GO:0002831	regulation of response to biotic stimulus	10/399	139/17913	0.00111869	0.0106937	0.00757698	CD55/IL1B/CARD16/RIPK2/FGL2/TNFAIP3/SELENOK/BIRC3/ZC3H12A/TRIB1	10	M1
GO:0002792	negative regulation of peptide secretion	10/399	142/17913	0.00131551	0.0120316	0.00852491	NLRP3/IL1B/LILRA5/CARD16/PIM3/TNFAIP3/EZR/IL1R2/MAP4K4/ZC3H12A	10	M1
GO:0019359	nicotinamide nucleotide biosynthetic process	10/399	142/17913	0.00131551	0.0120316	0.00852491	NAMPT/PTGS2/KYNU/PNP/HIF1A/PFKFB3/PRKAG2/STAT3/RANBP2/HK2	10	M1
GO:0019363	pyridine nucleotide biosynthetic process	10/399	142/17913	0.00131551	0.0120316	0.00852491	NAMPT/PTGS2/KYNU/PNP/HIF1A/PFKFB3/PRKAG2/STAT3/RANBP2/HK2	10	M1
GO:0072525	pyridine-containing compound biosynthetic process	10/399	145/17913	0.00153966	0.0133407	0.00945245	NAMPT/PTGS2/KYNU/PNP/HIF1A/PFKFB3/PRKAG2/STAT3/RANBP2/HK2	10	M1
GO:0035821	modification of morphology or physiology of other organism	10/399	160/17913	0.00317058	0.0222642	0.0157751	S100A12/SERPINB9/S100A9/CHD1/TGFB1/MPEG1/ANXA2/RXRA/ZC3H12A/PTX3	10	M1
GO:0034614	cellular response to reactive oxygen species	10/399	165/17913	0.00394815	0.0258335	0.0183042	SOD2/PPIF/KDM6B/GCH1/CYP1B1/LRRK2/FOXO3/TNFAIP3/NCF1/IL6	10	M1
GO:0009166	nucleotide catabolic process	10/399	169/17913	0.00467284	0.0291136	0.0206282	UPP1/PDE4B/PDE4A/PNP/HIF1A/PFKFB3/PRKAG2/STAT3/RANBP2/HK2	10	M1
GO:1901292	nucleoside phosphate catabolic process	10/399	175/17913	0.00595165	0.0346103	0.0245229	UPP1/PDE4B/PDE4A/PNP/HIF1A/PFKFB3/PRKAG2/STAT3/RANBP2/HK2	10	M1
GO:0051099	positive regulation of binding	10/399	181/17913	0.00748825	0.0406911	0.0288314	PLAUR/S100A10/CTNNB1/RIPK2/SYAP1/TGFB1/LRRK2/RIPOR2/RARA/ANXA2	10	M1
GO:1905475	regulation of protein localization to membrane	10/399	181/17913	0.00748825	0.0406911	0.0288314	ITGB2/TGFB1/BID/ITGAM/EZR/ITGB1/NUMB/FYN/GRASP/ACSL3	10	M1
GO:0051147	regulation of muscle cell differentiation	10/399	185/17913	0.0086717	0.0451355	0.0319804	SOD2/EREG/EHD1/CTNNB1/TGFB1/SPAG9/CD53/AKAP13/RIPOR2/CAPN2	10	M1
GO:0017157	regulation of exocytosis	10/399	187/17913	0.00931476	0.0476622	0.0337707	ITGB2/FGR/FCER1G/LRRK2/ITGAM/ADGRE2/LYN/PRKCB/STXBP2/RAB27A	10	M1
GO:0048002	antigen processing and presentation of peptide antigen	10/399	188/17913	0.00964967	0.0486865	0.0344965	CTSS/SLC11A1/NCF2/IFI30/CLEC4A/HLA-C/CYBB/HLA-B/AP1S2/NCF1	10	M1
GO:1901654	response to ketone	10/399	191/17913	0.0107097	0.0528366	0.037437	ATP2B1/DUSP1/CYBB/THBS1/TLR2/TGFB1/MSN/FOXO3/CDKN1A/TSPO	10	M1
GO:0031099	regeneration	10/399	194/17913	0.011856	0.0567276	0.0401939	C5AR1/SULF2/TGFB1/CDKN1A/TSPO/NDEL1/CEBPB/MAP4K4/LCP1/ADM	10	M1
GO:0032869	cellular response to insulin stimulus	10/399	197/17913	0.0130927	0.0610671	0.0432687	ATP2B1/IL1B/PTPRE/SYAP1/NDEL1/TCIRG1/RAB31/ATP6V0D1/ATP6V1B2/PRKCB	10	M1
GO:0030278	regulation of ossification	10/399	199/17913	0.0139694	0.0639485	0.0453103	ATP2B1/CTNNB1/TGFB1/HIF1A/AREG/TCIRG1/CEBPB/DDX5/IL6R/IL6	10	M1
GO:0048762	mesenchymal cell differentiation	10/399	199/17913	0.0139694	0.0639485	0.0453103	S100A4/IL1B/CTNNB1/TGFB1/HIF1A/DDX5/ZEB2/GLIPR2/SNAI1/IL6	10	M1
GO:0071456	cellular response to hypoxia	10/399	210/17913	0.0195969	0.0811357	0.0574882	PTGS2/MALAT1/VEGFA/CARD16/CYBB/FOXO3/ADAM8/BACH1/HIF1A/PLK3	10	M1
GO:0001894	tissue homeostasis	10/399	214/17913	0.0220066	0.0882846	0.0625534	VEGFA/CORO1A/CTSH/CTNNB1/ADAM8/TNFAIP3/TCIRG1/LPCAT1/SASH3/IL6	10	M1
GO:0008406	gonad development	10/399	217/17913	0.0239502	0.0924119	0.0654778	EREG/VEGFA/FLNA/FOXO3/BASP1/H3F3A/RARA/CEBPB/PTX3/INHBA	10	M1
GO:0032872	regulation of stress-activated MAPK cascade	10/399	220/17913	0.0260147	0.0981911	0.0695727	IL1B/VEGFA/DUSP1/RIPK2/MAP3K2/EZR/NCF1/ZEB2/MAP4K4/ZC3H12A	10	M1
GO:0045444	fat cell differentiation	10/399	222/17913	0.0274601	0.102658	0.0727375	PTGS2/METRNL/SYAP1/TGFB1/CEBPB/LAMB3/ZC3H12A/INSIG1/FFAR2/IL6	10	M1
GO:0045137	development of primary sexual characteristics	10/399	223/17913	0.0282039	0.103523	0.0733505	EREG/VEGFA/FLNA/FOXO3/BASP1/H3F3A/RARA/CEBPB/PTX3/INHBA	10	M1
GO:0043903	regulation of symbiosis, encompassing mutualism through parasitism	10/399	232/17913	0.0355535	0.1211	0.0858045	FCN1/CXCL8/CHD1/IFITM2/DDX5/APOBEC3A/VPS37B/ANXA2/ZC3H12A/PTX3	10	M1
GO:0031334	positive regulation of protein complex assembly	10/399	239/17913	0.0421225	0.13724	0.0972408	VEGFA/CORO1A/CTNNB1/TGFB1/MSN/VASP/BID/WARS/PLEK/LCP1	10	M1
GO:0061448	connective tissue development	10/399	243/17913	0.0462265	0.145227	0.1029	CD44/TIMP1/SULF2/CTNNB1/TGFB1/RARA/HIF1A/TRPS1/SNAI1/IL6R	10	M1
GO:0007204	positive regulation of cytosolic calcium ion concentration	10/399	255/17913	0.0601311	0.172775	0.122418	CD55/PTPRC/CD52/CORO1A/TGFB1/LYN/FYN/DIAPH1/ADM/PROK2	10	M1
GO:0010769	regulation of cell morphogenesis involved in differentiation	10/399	260/17913	0.0666499	0.183418	0.12996	VEGFA/FLNA/S100A10/LIMS1/LRRK2/SKIL/NDEL1/ZEB2/MYADM/NEDD9	10	M1
GO:0045927	positive regulation of growth	10/399	266/17913	0.0750483	0.198211	0.140441	VEGFA/HBEGF/S100A9/BASP1/H3F3A/NDEL1/EZR/S100A8/ADAM17/SASH3	10	M1
GO:0050768	negative regulation of neurogenesis	10/399	271/17913	0.0825311	0.210776	0.149344	IL1B/CTNNB1/TGFB1/LRRK2/FOXO3/TSPO/VIM/STAT3/MAP4K4/IL6	10	M1
GO:0030522	intracellular receptor signaling pathway	10/399	272/17913	0.0840807	0.213353	0.15117	CTNNB1/RIPK2/NFKBIA/TNFAIP3/RARA/DDX5/CREM/STAT3/RXRA/BIRC3	10	M1
GO:0090287	regulation of cellular response to growth factor stimulus	10/399	276/17913	0.0904558	0.224123	0.158801	IL1B/VEGFA/SULF2/CTNNB1/THBS1/TGFB1/HIF1A/PRKCB/ADAM17/ITGA5	10	M1
GO:0009260	ribonucleotide biosynthetic process	10/399	279/17913	0.0954228	0.232075	0.164435	ACSL1/UPP1/TGFB1/HIF1A/PFKFB3/PRKAG2/STAT3/RANBP2/ACSL3/HK2	10	M1
GO:0016050	vesicle organization	10/399	280/17913	0.0971137	0.234604	0.166227	SERPINA1/S100A10/CORO1A/AREG/F5/ZEB2/VPS37B/ANXA2/INSIG1/RAB27A	10	M1
GO:0046390	ribose phosphate biosynthetic process	10/399	284/17913	0.104053	0.247929	0.175668	ACSL1/UPP1/TGFB1/HIF1A/PFKFB3/PRKAG2/STAT3/RANBP2/ACSL3/HK2	10	M1
GO:0072522	purine-containing compound biosynthetic process	10/399	291/17913	0.11687	0.267639	0.189634	ACSL1/TGFB1/PNP/HIF1A/PFKFB3/PRKAG2/STAT3/RANBP2/ACSL3/HK2	10	M1
GO:0070588	calcium ion transmembrane transport	10/399	293/17913	0.120688	0.273842	0.194029	ATP2B1/PTPRC/CORO1A/PDE4B/AHNAK/TGFB1/LYN/FYN/ANXA2/DIAPH1	10	M1
GO:0009101	glycoprotein biosynthetic process	10/399	302/17913	0.138705	0.306722	0.217326	VCAN/HBEGF/CTNNB1/TET2/B4GALT1/PHLDA1/DSE/CSGALNACT2/ASGR1/AGO2	10	M1
GO:0032535	regulation of cellular component size	10/399	315/17913	0.167061	0.352508	0.249767	VEGFA/CORO1A/MSN/VASP/PPP1R15A/NDEL1/EZR/CAPG/PLEK/MYADM	10	M1
GO:0051056	regulation of small GTPase mediated signal transduction	10/399	316/17913	0.169351	0.35693	0.2529	FGD4/SPATA13/AKAP13/IQSEC1/RIPOR2/LYN/ITGB1/MAP4K4/ARHGAP26/TAGAP	10	M1
GO:0010721	negative regulation of cell development	10/399	317/17913	0.171656	0.360592	0.255495	IL1B/CTNNB1/TGFB1/LRRK2/FOXO3/TSPO/VIM/STAT3/MAP4K4/IL6	10	M1
GO:0030111	regulation of Wnt signaling pathway	10/399	341/17913	0.231153	0.417411	0.295753	SULF2/CTNNB1/TLR2/LRRK2/FOXO3/ATP6AP2/NFKB1/TMEM170B/ZEB2/RNF213	10	M1
GO:0006936	muscle contraction	10/399	343/17913	0.236438	0.417411	0.295753	ATP2B1/PTGS2/SULF2/FLNA/PDE4B/VIM/ZC3H12A/TPM4/MAP2K3/PROK2	10	M1
GO:0045666	positive regulation of neuron differentiation	10/399	355/17913	0.269042	0.436692	0.309415	VEGFA/S100A9/SPAG9/SKIL/NDEL1/RARA/LYN/ZEB2/FYN/IQGAP1	10	M1
GO:0045787	positive regulation of cell cycle	10/399	373/17913	0.320301	0.473948	0.335813	IL1B/EREG/EVI2B/TGFB1/CDKN1A/RARA/PLK3/IL1A/CCPG1/ADAM17	10	M1
GO:0034660	ncRNA metabolic process	10/399	470/17913	0.603466	0.681852	0.483122	NABP1/WARS/POU2F2/NFKB1/DDX21/TAF13/ZC3H12A/NAF1/AGO2/TRMT6	10	M1
GO:0010575	positive regulation of vascular endothelial growth factor production	9/399	29/17913	8.33e-09	6.27e-07	4.45e-07	C5AR1/PTGS2/IL1B/SULF2/CYP1B1/TGFB1/HIF1A/IL1A/IL6	9	M1
GO:0010574	regulation of vascular endothelial growth factor production	9/399	34/17913	3.95e-08	2.09e-06	1.48e-06	C5AR1/PTGS2/IL1B/SULF2/CYP1B1/TGFB1/HIF1A/IL1A/IL6	9	M1
GO:0010573	vascular endothelial growth factor production	9/399	36/17913	6.82e-08	3.14e-06	2.23e-06	C5AR1/PTGS2/IL1B/SULF2/CYP1B1/TGFB1/HIF1A/IL1A/IL6	9	M1
GO:0006953	acute-phase response	9/399	47/17913	7.95e-07	2.68e-05	1.9e-05	SERPINA1/PTGS2/IL1B/CEBPB/IL1A/STAT3/IL6R/HP/IL6	9	M1
GO:0001774	microglial cell activation	9/399	50/17913	1.38e-06	4.17e-05	2.95e-05	NAMPT/C5AR1/PTPRC/ITGB2/TLR2/LRRK2/ITGAM/FPR2/IL6	9	M1
GO:0002269	leukocyte activation involved in inflammatory response	9/399	50/17913	1.38e-06	4.17e-05	2.95e-05	NAMPT/C5AR1/PTPRC/ITGB2/TLR2/LRRK2/ITGAM/FPR2/IL6	9	M1
GO:0150077	regulation of neuroinflammatory response	9/399	51/17913	1.64e-06	4.89e-05	3.47e-05	C5AR1/PTPRC/PTGS2/TNFRSF1B/IL1B/ITGB2/LRRK2/ITGAM/IL6	9	M1
GO:0006968	cellular defense response	9/399	53/17913	2.3e-06	6.5e-05	4.61e-05	C5AR1/LSP1/NCF2/LILRB2/MNDA/ITGB1/NCF1/TCIRG1/CLEC5A	9	M1
GO:0032722	positive regulation of chemokine production	9/399	55/17913	3.17e-06	8.59e-05	6.09e-05	IL1B/RIPK2/TLR2/SELENOK/HIF1A/IL6R/ADAM17/FFAR2/IL6	9	M1
GO:0033619	membrane protein proteolysis	9/399	56/17913	3.7e-06	9.35e-05	6.62e-05	TIMP1/TNFRSF1B/IL1B/CTSH/TGFB1/ADAM8/NFKB1/MYH9/ADAM17	9	M1
GO:0042093	T-helper cell differentiation	9/399	58/17913	5e-06	0.000122874	8.71e-05	NLRP3/RIPK2/NFKBIZ/RARA/CD86/MALT1/STAT3/ZC3H12A/IL6	9	M1
GO:0072678	T cell migration	9/399	59/17913	5.79e-06	0.000139855	9.91e-05	OXSR1/MSN/ADAM8/CCL20/SELENOK/RIPOR2/MYO1G/DOCK8/ADAM17	9	M1
GO:0002294	CD4-positive, alpha-beta T cell differentiation involved in immune response	9/399	60/17913	6.68e-06	0.000158072	0.000112001	NLRP3/RIPK2/NFKBIZ/RARA/CD86/MALT1/STAT3/ZC3H12A/IL6	9	M1
GO:0002287	alpha-beta T cell activation involved in immune response	9/399	61/17913	7.68e-06	0.000174268	0.000123476	NLRP3/RIPK2/NFKBIZ/RARA/CD86/MALT1/STAT3/ZC3H12A/IL6	9	M1
GO:0002293	alpha-beta T cell differentiation involved in immune response	9/399	61/17913	7.68e-06	0.000174268	0.000123476	NLRP3/RIPK2/NFKBIZ/RARA/CD86/MALT1/STAT3/ZC3H12A/IL6	9	M1
GO:0042108	positive regulation of cytokine biosynthetic process	9/399	63/17913	1.01e-05	0.000217466	0.000154084	PTPRC/IL1B/EREG/CYBB/THBS1/CD86/IL1A/STAT3/IL6	9	M1
GO:0046637	regulation of alpha-beta T cell differentiation	9/399	63/17913	1.01e-05	0.000217466	0.000154084	NLRP3/RIPK2/NFKBIZ/PNP/RARA/CD86/MALT1/ZC3H12A/SASH3	9	M1
GO:0071260	cellular response to mechanical stimulus	9/399	77/17913	5.22e-05	0.000884013	0.000626361	PTGS2/IL1B/CASP1/MYD88/MAP3K2/TGFB1/RIPOR2/NFKB1/TNFRSF10B	9	M1
GO:0032642	regulation of chemokine production	9/399	79/17913	6.41e-05	0.00105884	0.000750231	IL1B/RIPK2/TLR2/SELENOK/HIF1A/IL6R/ADAM17/FFAR2/IL6	9	M1
GO:0046209	nitric oxide metabolic process	9/399	81/17913	7.81e-05	0.00126716	0.00089784	PTGS2/IL1B/ITGB2/GCH1/TLR2/CYP1B1/TSPO/ZC3H12A/PTX3	9	M1
GO:2001057	reactive nitrogen species metabolic process	9/399	84/17913	0.000103946	0.00161329	0.00114308	PTGS2/IL1B/ITGB2/GCH1/TLR2/CYP1B1/TSPO/ZC3H12A/PTX3	9	M1
GO:0050830	defense response to Gram-positive bacterium	9/399	86/17913	0.000124869	0.00188791	0.00133766	C5AR1/NLRP3/FGR/MYD88/RIPK2/TLR2/MPEG1/ADAM17/IL6	9	M1
GO:0072676	lymphocyte migration	9/399	87/17913	0.000136584	0.00203049	0.00143869	OXSR1/MSN/ADAM8/CCL20/SELENOK/RIPOR2/MYO1G/DOCK8/ADAM17	9	M1
GO:0048010	vascular endothelial growth factor receptor signaling pathway	9/399	93/17913	0.000227833	0.00305957	0.00216784	IL1B/NCF2/VEGFA/CYBB/HIF1A/NCF1/FYN/PRKCB/ITGA5	9	M1
GO:0007044	cell-substrate junction assembly	9/399	96/17913	0.000289673	0.00371066	0.00262916	VEGFA/S100A10/LIMS1/THBS1/PLEC/LAMB3/MAP4K4/ITGA5/IQGAP1	9	M1
GO:0006690	icosanoid metabolic process	9/399	102/17913	0.0004553	0.00544493	0.00385797	PTGS2/IL1B/PNPLA8/ALOX5/TLR2/CYP1B1/LTA4H/ALOX5AP/CYP4F3	9	M1
GO:0031623	receptor internalization	9/399	102/17913	0.0004553	0.00544493	0.00385797	ITGB2/VEGFA/FCER1G/CXCL8/EZR/ITGB1/NUMB/RAB31/ADM	9	M1
GO:0006606	protein import into nucleus	9/399	103/17913	0.00048928	0.00570827	0.00404456	PTGS2/FLNA/NFKBIA/TGFB1/LRRK2/CDKN1A/STAT3/RANBP2/ZC3H12A	9	M1
GO:0062014	negative regulation of small molecule metabolic process	9/399	107/17913	0.000646694	0.00720439	0.00510462	PPIF/TGFB1/TSPO/NFKB1/PLEK/STAT3/SNAI1/INSIG1/CDA	9	M1
GO:0032612	interleukin-1 production	9/399	108/17913	0.000691907	0.00751753	0.00532649	NLRP3/IL1B/LILRA5/CARD16/CASP1/RIPK2/TNFAIP3/IL1R2/ZC3H12A	9	M1
GO:0010811	positive regulation of cell-substrate adhesion	9/399	110/17913	0.000790081	0.00822461	0.00582749	VEGFA/FLNA/S100A10/LIMS1/MYADM/NEDD9/MAP4K4/ITGA5/IQGAP1	9	M1
GO:0050864	regulation of B cell activation	9/399	110/17913	0.000790081	0.00822461	0.00582749	SAMSN1/PTPRC/TGFB1/CDKN1A/TNFAIP3/MNDA/NFAM1/INHBA/IL6	9	M1
GO:0021782	glial cell development	9/399	111/17913	0.000843258	0.00867658	0.00614773	C5AR1/IL1B/TLR2/TGFB1/S100A8/LYN/VIM/FPR2/IL6	9	M1
GO:0002223	stimulatory C-type lectin receptor signaling pathway	9/399	113/17913	0.000958351	0.0095767	0.0067855	FCER1G/CLEC4A/CLEC4E/ICAM3/LYN/NFKB1/MALT1/FYN/CLEC10A	9	M1
GO:0030183	B cell differentiation	9/399	113/17913	0.000958351	0.0095767	0.0067855	PTPRC/POU2F2/ITGB1/TCIRG1/MALT1/DOCK10/NFAM1/ADAM17/INHBA	9	M1
GO:0001704	formation of primary germ layer	9/399	117/17913	0.00122679	0.011432	0.00810007	ITGB2/KDM6B/ETS2/CTNNB1/ITGB1/LAMB3/SNAI1/ITGA5/INHBA	9	M1
GO:0046425	regulation of JAK-STAT cascade	9/399	120/17913	0.0014655	0.0129772	0.00919492	PTPRC/SOCS3/CYP1B1/LYN/OSM/FYN/STAT3/IL6R/IL6	9	M1
GO:0046718	viral entry into host cell	9/399	121/17913	0.00155288	0.0133771	0.00947822	FCN1/CD55/ANPEP/IFITM2/ITGB1/CD86/PTX3/ITGA5/CLEC5A	9	M1
GO:0032479	regulation of type I interferon production	9/399	123/17913	0.0017402	0.0144583	0.0102443	MYD88/CTNNB1/RIPK2/REL/TLR2/TNFAIP3/NFKB2/LRRFIP1/NFKB1	9	M1
GO:0032606	type I interferon production	9/399	125/17913	0.00194519	0.0156072	0.0110584	MYD88/CTNNB1/RIPK2/REL/TLR2/TNFAIP3/NFKB2/LRRFIP1/NFKB1	9	M1
GO:0051170	import into nucleus	9/399	125/17913	0.00194519	0.0156072	0.0110584	PTGS2/FLNA/NFKBIA/TGFB1/LRRK2/CDKN1A/STAT3/RANBP2/ZC3H12A	9	M1
GO:0014013	regulation of gliogenesis	9/399	128/17913	0.00228839	0.017721	0.0125561	C5AR1/TNFRSF1B/IL1B/CTNNB1/TLR2/TGFB1/TSPO/LYN/IL6	9	M1
GO:1904892	regulation of STAT cascade	9/399	129/17913	0.00241291	0.0182715	0.0129462	PTPRC/SOCS3/CYP1B1/LYN/OSM/FYN/STAT3/IL6R/IL6	9	M1
GO:0034332	adherens junction organization	9/399	134/17913	0.00311856	0.0220732	0.0156398	VEGFA/S100A10/LIMS1/CTNNB1/THBS1/IQSEC1/NUMB/MAP4K4/IQGAP1	9	M1
GO:2000241	regulation of reproductive process	9/399	135/17913	0.00327743	0.0224817	0.0159293	TIMP1/DUSP1/CTNNB1/B4GALT1/RXRA/PHLDA2/SNAI1/AGO2/INHBA	9	M1
GO:2001056	positive regulation of cysteine-type endopeptidase activity	9/399	135/17913	0.00327743	0.0224817	0.0159293	NLRP3/CTSH/CASP1/S100A9/RIPK2/S100A8/FYN/TNFRSF10B/F3	9	M1
GO:0010770	positive regulation of cell morphogenesis involved in differentiation	9/399	138/17913	0.00379255	0.0250488	0.0177482	VEGFA/FLNA/S100A10/LIMS1/SKIL/NDEL1/ZEB2/MYADM/NEDD9	9	M1
GO:0001837	epithelial to mesenchymal transition	9/399	140/17913	0.00416976	0.0266313	0.0188694	S100A4/IL1B/CTNNB1/TGFB1/HIF1A/DDX5/GLIPR2/SNAI1/IL6	9	M1
GO:0007259	JAK-STAT cascade	9/399	140/17913	0.00416976	0.0266313	0.0188694	PTPRC/SOCS3/CYP1B1/LYN/OSM/FYN/STAT3/IL6R/IL6	9	M1
GO:0017038	protein import	9/399	140/17913	0.00416976	0.0266313	0.0188694	PTGS2/FLNA/NFKBIA/TGFB1/LRRK2/CDKN1A/STAT3/RANBP2/ZC3H12A	9	M1
GO:0006633	fatty acid biosynthetic process	9/399	144/17913	0.00501171	0.0302267	0.0214169	PTGS2/IL1B/PNPLA8/ALOX5/LTA4H/PRKAG2/ACSL3/INSIG1/ALOX5AP	9	M1
GO:0045834	positive regulation of lipid metabolic process	9/399	144/17913	0.00501171	0.0302267	0.0214169	PTGS2/IL1B/FGR/TGFB1/LYN/CAPN2/ACSL3/FPR2/ADM	9	M1
GO:0042133	neurotransmitter metabolic process	9/399	145/17913	0.00524148	0.0315696	0.0223684	PTGS2/IL1B/ITGB2/GCH1/TLR2/CYP1B1/TSPO/ZC3H12A/PTX3	9	M1
GO:0071236	cellular response to antibiotic	9/399	147/17913	0.00572544	0.0337527	0.0239153	PPIF/KDM6B/CYBB/CYP1B1/LRRK2/FOXO3/TNFAIP3/ZC3H12A/IL6	9	M1
GO:0090316	positive regulation of intracellular protein transport	9/399	150/17913	0.00651523	0.0370335	0.0262398	PTGS2/IL1B/ITGB2/FLNA/TGFB1/ITGAM/PLK3/FYN/ZC3H12A	9	M1
GO:0097696	STAT cascade	9/399	150/17913	0.00651523	0.0370335	0.0262398	PTPRC/SOCS3/CYP1B1/LYN/OSM/FYN/STAT3/IL6R/IL6	9	M1
GO:0001890	placenta development	9/399	151/17913	0.00679628	0.0383856	0.0271978	PTGS2/SOCS3/HIF1A/CEBPB/RXRA/PHLDA2/SNAI1/JUNB/ADM	9	M1
GO:1905952	regulation of lipid localization	9/399	151/17913	0.00679628	0.0383856	0.0271978	IL1B/EHD1/NFKBIA/THBS1/TSPO/NFKB1/ANXA2/ZC3H12A/IL6	9	M1
GO:1903707	negative regulation of hemopoiesis	9/399	152/17913	0.00708653	0.0393745	0.0278985	LILRB3/CTNNB1/NFKBIA/MAFB/RARA/LYN/ZC3H12A/TRIB1/INHBA	9	M1
GO:0001906	cell killing	9/399	156/17913	0.00834343	0.0437858	0.0310241	CD55/PTPRC/S100A12/SERPINB9/CORO1A/CTSH/ITGAM/STXBP2/RAB27A	9	M1
GO:0030203	glycosaminoglycan metabolic process	9/399	157/17913	0.00868259	0.0451393	0.0319832	CD44/VCAN/IL1B/TGFB1/B4GALT1/DSE/NFKB1/CSGALNACT2/HGSNAT	9	M1
GO:0006022	aminoglycan metabolic process	9/399	161/17913	0.0101448	0.0504402	0.0357391	CD44/VCAN/IL1B/TGFB1/B4GALT1/DSE/NFKB1/CSGALNACT2/HGSNAT	9	M1
GO:0033209	tumor necrosis factor-mediated signaling pathway	9/399	167/17913	0.012676	0.0594983	0.0421571	TNFRSF1B/LIMS1/CARD16/CASP1/NFKBIA/FOXO3/TNFAIP3/BIRC3/ADAM17	9	M1
GO:0071248	cellular response to metal ion	9/399	167/17913	0.012676	0.0594983	0.0421571	PTGS2/PPIF/CYBB/LRRK2/TSPO/NCF1/JUNB/IQGAP1/ALOX5AP	9	M1
GO:0008217	regulation of blood pressure	9/399	169/17913	0.0136161	0.0631109	0.0447168	NAMPT/ATP2B1/PTGS2/SOD2/GCH1/ATP6AP2/SCPEP1/ADM/CES1	9	M1
GO:0048771	tissue remodeling	9/399	170/17913	0.014105	0.0645028	0.045703	TIMP1/CTNNB1/TGFB1/ADAM8/TNFAIP3/HIF1A/TCIRG1/IL1A/IL6	9	M1
GO:0002478	antigen processing and presentation of exogenous peptide antigen	9/399	174/17913	0.0161913	0.0721147	0.0510964	CTSS/NCF2/IFI30/CLEC4A/HLA-C/CYBB/HLA-B/AP1S2/NCF1	9	M1
GO:0019884	antigen processing and presentation of exogenous antigen	9/399	176/17913	0.0173155	0.0762052	0.0539947	CTSS/NCF2/IFI30/CLEC4A/HLA-C/CYBB/HLA-B/AP1S2/NCF1	9	M1
GO:0043534	blood vessel endothelial cell migration	9/399	182/17913	0.0210293	0.0855214	0.0605956	PTGS2/VEGFA/THBS1/TGFB1/HIF1A/ITGB1/MYH9/ADAM17/MAP2K3	9	M1
GO:0051216	cartilage development	9/399	182/17913	0.0210293	0.0855214	0.0605956	CD44/TIMP1/SULF2/CTNNB1/TGFB1/RARA/HIF1A/TRPS1/SNAI1	9	M1
GO:0016052	carbohydrate catabolic process	9/399	185/17913	0.0230872	0.0920338	0.0652099	GK/HIF1A/AOAH/PFKFB3/PRKAG2/STAT3/RANBP2/HK2/GK5	9	M1
GO:0019722	calcium-mediated signaling	9/399	188/17913	0.0252852	0.0963916	0.0682976	PTPRC/CXCL8/LRRK2/CCL20/SELENOK/PLEK/BST1/NFAT5/FPR2	9	M1
GO:0001763	morphogenesis of a branching structure	9/399	192/17913	0.0284415	0.103747	0.0735091	VEGFA/CTSH/CTNNB1/SOCS3/TGFB1/LRRK2/AREG/RXRA/ADM	9	M1
GO:0097164	ammonium ion metabolic process	9/399	193/17913	0.0292719	0.105783	0.074952	PLBD1/ITGB2/PNPLA8/GCH1/ITGAM/SAT1/LPCAT1/CAPN2/ACSL3	9	M1
GO:0071241	cellular response to inorganic substance	9/399	194/17913	0.0301191	0.108385	0.0767958	PTGS2/PPIF/CYBB/LRRK2/TSPO/NCF1/JUNB/IQGAP1/ALOX5AP	9	M1
GO:0031396	regulation of protein ubiquitination	9/399	196/17913	0.0318648	0.113311	0.0802858	RIPK2/LRRK2/IVNS1ABP/TNFAIP3/TSPO/RASSF5/MALT1/FYN/BIRC3	9	M1
GO:0006109	regulation of carbohydrate metabolic process	9/399	198/17913	0.0336795	0.115989	0.0821834	TGFB1/HIF1A/PFKFB3/NFKB1/PLEK/PRKAG2/STAT3/RANBP2/PHLDA2	9	M1
GO:0071229	cellular response to acid chemical	9/399	199/17913	0.0346131	0.118078	0.0836632	VEGFA/CYBB/RARA/LYN/CEBPB/FYN/CAPN2/ZC3H12A/FFAR2	9	M1
GO:0050792	regulation of viral process	9/399	204/17913	0.0395492	0.130607	0.0925403	FCN1/CXCL8/CHD1/IFITM2/DDX5/APOBEC3A/VPS37B/ZC3H12A/PTX3	9	M1
GO:0060560	developmental growth involved in morphogenesis	9/399	214/17913	0.050808	0.155004	0.109827	VEGFA/C9orf72/CTNNB1/TGFB1/NDEL1/ITGB1/AREG/ZEB2/IQGAP1	9	M1
GO:0042445	hormone metabolic process	9/399	215/17913	0.0520385	0.157631	0.111689	IL1B/CYP1B1/TSPO/HIF1A/ATP6AP2/NFKB1/SCPEP1/ADM/CES1	9	M1
GO:0031669	cellular response to nutrient levels	9/399	220/17913	0.0584838	0.171818	0.12174	NAMPT/ATP2B1/PTGS2/UPP1/CYBB/LRRK2/CDKN1A/FYN/ZC3H12A	9	M1
GO:0015850	organic hydroxy compound transport	9/399	228/17913	0.0698251	0.190179	0.13475	AQP9/FCER1G/NFKBIA/TSPO/NFKB1/ANXA2/RXRA/SLC16A3/CES1	9	M1
GO:1903362	regulation of cellular protein catabolic process	9/399	230/17913	0.0728607	0.194003	0.13746	MSN/LRRK2/TNFAIP3/EZR/PLK3/RYBP/ANXA2/FBXL5/TRIB1	9	M1
GO:0045165	cell fate commitment	9/399	238/17913	0.0858097	0.214404	0.151914	KDM6B/ETS2/MCL1/CTNNB1/RARA/ITGB1/CEBPB/STAT3/IL6	9	M1
GO:1901617	organic hydroxy compound biosynthetic process	9/399	241/17913	0.0909987	0.224841	0.15931	IL1B/GCH1/NFKB1/PLEK/ZEB2/PRKAG2/SNAI1/INSIG1/CES1	9	M1
GO:0090257	regulation of muscle system process	9/399	251/17913	0.109599	0.254795	0.180533	ATP2B1/PTGS2/TNFRSF1B/FLNA/PDE4B/FOXO3/JARID2/ZC3H12A/PROK2	9	M1
GO:0034976	response to endoplasmic reticulum stress	9/399	254/17913	0.115566	0.26479	0.187615	CXCL8/THBS1/LRRK2/PPP1R15A/SELENOK/CEBPB/PPP1R15B/ATP6V0D1/TNFRSF10B	9	M1
GO:0046883	regulation of hormone secretion	9/399	254/17913	0.115566	0.26479	0.187615	IL1B/PIM3/HIF1A/TCIRG1/OSM/MAP4K4/FFAR2/HCAR2/INHBA	9	M1
GO:0016579	protein deubiquitination	9/399	260/17913	0.128025	0.286949	0.203316	NLRP3/NFKBIA/JOSD1/USP15/TNFAIP3/HIF1A/USP3/BIRC3/ZC3H12A	9	M1
GO:0009152	purine ribonucleotide biosynthetic process	9/399	266/17913	0.141168	0.311565	0.220757	ACSL1/TGFB1/HIF1A/PFKFB3/PRKAG2/STAT3/RANBP2/ACSL3/HK2	9	M1
GO:0070646	protein modification by small protein removal	9/399	273/17913	0.157336	0.338509	0.239848	NLRP3/NFKBIA/JOSD1/USP15/TNFAIP3/HIF1A/USP3/BIRC3/ZC3H12A	9	M1
GO:0060047	heart contraction	9/399	275/17913	0.162115	0.345282	0.244647	ATP2B1/FLNA/HBEGF/PDE4B/GCH1/ZC3H12A/ATP1B3/MAP2K3/ADM	9	M1
GO:0006164	purine nucleotide biosynthetic process	9/399	280/17913	0.174362	0.364588	0.258326	ACSL1/TGFB1/HIF1A/PFKFB3/PRKAG2/STAT3/RANBP2/ACSL3/HK2	9	M1
GO:0050890	cognition	9/399	286/17913	0.189601	0.387128	0.274297	C5AR1/PTGS2/LILRB2/TLR2/HIF1A/ITGB1/CEBPB/FYN/ITGA5	9	M1
GO:0090150	establishment of protein localization to membrane	9/399	287/17913	0.192196	0.390275	0.276527	ITGB2/BID/ITGAM/RILPL2/NCF1/FYN/RAB31/GRASP/ACSL3	9	M1
GO:1903522	regulation of blood circulation	9/399	292/17913	0.205398	0.397819	0.281872	ATP2B1/PTGS2/FLNA/HBEGF/PDE4B/GCH1/ZC3H12A/ATP1B3/ADM	9	M1
GO:0033044	regulation of chromosome organization	9/399	311/17913	0.258656	0.43239	0.306367	IL1B/VEGFA/DUSP1/CTNNB1/TGFB1/LRRK2/H3F3A/JARID2/NAF1	9	M1
GO:1902903	regulation of supramolecular fiber organization	9/399	313/17913	0.26451	0.436692	0.309415	FLNA/S100A10/CORO1A/C9orf72/VASP/AKAP13/CAPG/PLEK/MYADM	9	M1
GO:0007265	Ras protein signal transduction	9/399	324/17913	0.297395	0.459877	0.325842	FGD4/SPATA13/CDKN1A/AKAP13/IQSEC1/RIPOR2/LYN/ITGB1/MAP4K4	9	M1
GO:0048638	regulation of developmental growth	9/399	325/17913	0.300436	0.459877	0.325842	VEGFA/BASP1/CDKN1A/NDEL1/EZR/STAT3/JARID2/PHLDA2/SASH3	9	M1
GO:0022412	cellular process involved in reproduction in multicellular organism	9/399	326/17913	0.303484	0.46072	0.32644	EREG/CTNNB1/TGFB1/FOXO3/H3F3A/RARA/ITGB1/PTX3/INHBA	9	M1
GO:0030336	negative regulation of cell migration	9/399	332/17913	0.321923	0.476189	0.3374	TIMP1/DUSP1/THBS1/CYP1B1/TGFB1/FOXO3/RIPOR2/STAT3/TRIB1	9	M1
GO:2000146	negative regulation of cell motility	9/399	347/17913	0.368869	0.510786	0.361914	TIMP1/DUSP1/THBS1/CYP1B1/TGFB1/FOXO3/RIPOR2/STAT3/TRIB1	9	M1
GO:0031346	positive regulation of cell projection organization	9/399	362/17913	0.416438	0.545439	0.386467	VEGFA/S100A9/SKIL/NDEL1/RIPOR2/LYN/ZEB2/FYN/IQGAP1	9	M1
GO:0010256	endomembrane system organization	9/399	365/17913	0.425963	0.552607	0.391546	PTPRC/LRRK2/NDEL1/PLK3/BIN2/MYH9/VPS37B/PRKCB/RAB27A	9	M1
GO:0051271	negative regulation of cellular component movement	9/399	365/17913	0.425963	0.552607	0.391546	TIMP1/DUSP1/THBS1/CYP1B1/TGFB1/FOXO3/RIPOR2/STAT3/TRIB1	9	M1
GO:0040013	negative regulation of locomotion	9/399	377/17913	0.463922	0.580255	0.411135	TIMP1/DUSP1/THBS1/CYP1B1/TGFB1/FOXO3/RIPOR2/STAT3/TRIB1	9	M1
GO:0050804	modulation of chemical synaptic transmission	9/399	393/17913	0.513752	0.612976	0.43432	PTGS2/IL1B/LILRB2/LRRK2/RARA/ITGB1/FYN/STAT3/PRKCB	9	M1
GO:0050808	synapse organization	9/399	394/17913	0.516822	0.615396	0.436035	C5AR1/LILRB2/CTNNB1/TLR2/LRRK2/ITGAM/CAST/FYN/DOCK10	9	M1
GO:0099177	regulation of trans-synaptic signaling	9/399	394/17913	0.516822	0.615396	0.436035	PTGS2/IL1B/LILRB2/LRRK2/RARA/ITGB1/FYN/STAT3/PRKCB	9	M1
GO:0007517	muscle organ development	9/399	403/17913	0.544162	0.633418	0.448804	GPCPD1/HBEGF/CTNNB1/TGFB1/BASP1/RIPOR2/DDX5/JARID2/RXRA	9	M1
GO:0051052	regulation of DNA metabolic process	9/399	403/17913	0.544162	0.633418	0.448804	PTPRC/EREG/S100A11/DUSP1/CTNNB1/TGFB1/CDKN1A/NAF1/IL6	9	M1
GO:0007389	pattern specification process	9/399	408/17913	0.559097	0.645	0.45701	ETS2/CTNNB1/MAFB/BASP1/ITGAM/HIF1A/ATP6AP2/ZEB2/SNAI1	9	M1
GO:0032743	positive regulation of interleukin-2 production	8/399	30/17913	2.15e-07	8.86e-06	6.28e-06	PTPRC/IL1B/PDE4B/RIPK2/CD86/MALT1/IL1A/SASH3	8	M1
GO:2000516	positive regulation of CD4-positive, alpha-beta T cell activation	8/399	36/17913	9.9e-07	3.17e-05	2.24e-05	CD55/NLRP3/RIPK2/NFKBIZ/RARA/CD86/MALT1/SASH3	8	M1
GO:0002369	T cell cytokine production	8/399	40/17913	2.33e-06	6.55e-05	4.64e-05	SLC11A1/CD55/TNFRSF1B/NLRP3/IL1B/MALT1/SASH3/IL6	8	M1
GO:0043370	regulation of CD4-positive, alpha-beta T cell differentiation	8/399	47/17913	8.3e-06	0.000183654	0.000130127	NLRP3/RIPK2/NFKBIZ/RARA/CD86/MALT1/ZC3H12A/SASH3	8	M1
GO:0046638	positive regulation of alpha-beta T cell differentiation	8/399	47/17913	8.3e-06	0.000183654	0.000130127	NLRP3/RIPK2/NFKBIZ/PNP/RARA/CD86/MALT1/SASH3	8	M1
GO:0099024	plasma membrane invagination	8/399	50/17913	1.34e-05	0.00027783	0.000196855	ITGB2/FCER1G/THBS1/ITGAM/BIN2/RAB31/SNX18/MYH9	8	M1
GO:0002720	positive regulation of cytokine production involved in immune response	8/399	52/17913	1.8e-05	0.000361097	0.000255853	NLRP3/IL1B/FCER1G/MALT1/DDX21/FFAR2/SASH3/IL6	8	M1
GO:0002886	regulation of myeloid leukocyte mediated immunity	8/399	52/17913	1.8e-05	0.000361097	0.000255853	ITGB2/FGR/FCER1G/ITGAM/ADGRE2/LYN/DDX21/STXBP2	8	M1
GO:0050704	regulation of interleukin-1 secretion	8/399	52/17913	1.8e-05	0.000361097	0.000255853	NLRP3/LILRA5/CARD16/CASP1/RIPK2/TNFAIP3/IL1R2/ZC3H12A	8	M1
GO:0010324	membrane invagination	8/399	58/17913	4.09e-05	0.000738811	0.000523479	ITGB2/FCER1G/THBS1/ITGAM/BIN2/RAB31/SNX18/MYH9	8	M1
GO:0002260	lymphocyte homeostasis	8/399	60/17913	5.25e-05	0.000884013	0.000626361	CORO1A/TGFB1/SKIL/TNFAIP3/HIF1A/LYN/TCIRG1/DOCK10	8	M1
GO:0050701	interleukin-1 secretion	8/399	60/17913	5.25e-05	0.000884013	0.000626361	NLRP3/LILRA5/CARD16/CASP1/RIPK2/TNFAIP3/IL1R2/ZC3H12A	8	M1
GO:2000401	regulation of lymphocyte migration	8/399	60/17913	5.25e-05	0.000884013	0.000626361	OXSR1/MSN/ADAM8/CCL20/SELENOK/RIPOR2/DOCK8/ADAM17	8	M1
GO:0019915	lipid storage	8/399	64/17913	8.41e-05	0.00134398	0.00095227	IL1B/EHD1/NFKBIA/NFKB1/PLIN2/ZC3H12A/FFAR2/IL6	8	M1
GO:0043030	regulation of macrophage activation	8/399	66/17913	0.000104933	0.00161954	0.00114751	C5AR1/PTPRC/ITGB2/THBS1/LRRK2/ITGAM/ZC3H12A/IL6	8	M1
GO:0070664	negative regulation of leukocyte proliferation	8/399	71/17913	0.00017646	0.00249793	0.00176989	LILRB2/LST1/TGFB1/TNFAIP3/MNDA/LYN/VSIR/CEBPB	8	M1
GO:0006809	nitric oxide biosynthetic process	8/399	76/17913	0.000283959	0.00367988	0.00260735	PTGS2/IL1B/ITGB2/GCH1/CYP1B1/TSPO/ZC3H12A/PTX3	8	M1
GO:0022617	extracellular matrix disassembly	8/399	78/17913	0.000339732	0.00426584	0.00302253	CD44/TIMP1/CTSS/TGFB1/ADAM8/CAPN2/LCP1/IL6	8	M1
GO:0046427	positive regulation of JAK-STAT cascade	8/399	85/17913	0.00060931	0.00685575	0.0048576	SOCS3/CYP1B1/LYN/OSM/FYN/STAT3/IL6R/IL6	8	M1
GO:1903725	regulation of phospholipid metabolic process	8/399	86/17913	0.000658997	0.00723269	0.00512467	FGR/SOCS3/TGFB1/LYN/LPCAT1/CAPN2/ACSL3/FPR2	8	M1
GO:2000177	regulation of neural precursor cell proliferation	8/399	86/17913	0.000658997	0.00723269	0.00512467	VEGFA/FLNA/CTNNB1/TGFB1/LRRK2/FOXO3/HIF1A/LYN	8	M1
GO:2000117	negative regulation of cysteine-type endopeptidase activity	8/399	87/17913	0.000711899	0.00762504	0.00540267	CD44/PLAUR/PTGS2/VEGFA/SERPINB9/CARD16/THBS1/CAST	8	M1
GO:1900407	regulation of cellular response to oxidative stress	8/399	88/17913	0.000768169	0.00803414	0.00569253	SOD2/MCL1/CTNNB1/GCH1/LRRK2/FOXO3/HIF1A/FYN	8	M1
GO:1904894	positive regulation of STAT cascade	8/399	88/17913	0.000768169	0.00803414	0.00569253	SOCS3/CYP1B1/LYN/OSM/FYN/STAT3/IL6R/IL6	8	M1
GO:0002708	positive regulation of lymphocyte mediated immunity	8/399	91/17913	0.000958747	0.0095767	0.0067855	PTPRC/NLRP3/IL1B/FCER1G/TGFB1/MALT1/SASH3/IL6	8	M1
GO:0060333	interferon-gamma-mediated signaling pathway	8/399	91/17913	0.000958747	0.0095767	0.0067855	CD44/IFI30/HLA-C/HLA-B/SOCS3/IFNGR2/GBP2/IFNGR1	8	M1
GO:0036473	cell death in response to oxidative stress	8/399	92/17913	0.00103007	0.0101298	0.0071774	SOD2/MCL1/CTNNB1/CYP1B1/LRRK2/FOXO3/HIF1A/FYN	8	M1
GO:0045638	negative regulation of myeloid cell differentiation	8/399	92/17913	0.00103007	0.0101298	0.0071774	LILRB3/CTNNB1/NFKBIA/MAFB/RARA/LYN/TRIB1/INHBA	8	M1
GO:0032611	interleukin-1 beta production	8/399	93/17913	0.00110558	0.010637	0.00753676	NLRP3/IL1B/LILRA5/CARD16/CASP1/RIPK2/TNFAIP3/ZC3H12A	8	M1
GO:0001676	long-chain fatty acid metabolic process	8/399	94/17913	0.00118544	0.0111076	0.00787024	PTGS2/PNPLA8/ACSL1/ALOX5/CYP1B1/LTA4H/ACSL3/CYP4F3	8	M1
GO:0032652	regulation of interleukin-1 production	8/399	96/17913	0.00135893	0.0123275	0.00873453	NLRP3/LILRA5/CARD16/CASP1/RIPK2/TNFAIP3/IL1R2/ZC3H12A	8	M1
GO:1901570	fatty acid derivative biosynthetic process	8/399	96/17913	0.00135893	0.0123275	0.00873453	PTGS2/IL1B/PNPLA8/ACSL1/ALOX5/LTA4H/ACSL3/ALOX5AP	8	M1
GO:1902882	regulation of response to oxidative stress	8/399	97/17913	0.00145294	0.0129772	0.00919492	SOD2/MCL1/CTNNB1/GCH1/LRRK2/FOXO3/HIF1A/FYN	8	M1
GO:0033559	unsaturated fatty acid metabolic process	8/399	98/17913	0.00155203	0.0133771	0.00947822	PTGS2/IL1B/PNPLA8/ACSL1/ALOX5/CYP1B1/ALOX5AP/CYP4F3	8	M1
GO:0042136	neurotransmitter biosynthetic process	8/399	98/17913	0.00155203	0.0133771	0.00947822	PTGS2/IL1B/ITGB2/GCH1/CYP1B1/TSPO/ZC3H12A/PTX3	8	M1
GO:1902106	negative regulation of leukocyte differentiation	8/399	99/17913	0.0016564	0.0138919	0.009843	LILRB3/CTNNB1/MAFB/RARA/LYN/ZC3H12A/TRIB1/INHBA	8	M1
GO:2001237	negative regulation of extrinsic apoptotic signaling pathway	8/399	100/17913	0.00176625	0.0145658	0.0103205	IL1B/MCL1/THBS1/TNFAIP3/ITPRIP/IL1A/FYN/TNFRSF10B	8	M1
GO:0071887	leukocyte apoptotic process	8/399	103/17913	0.00213066	0.0166154	0.0117727	FCER1G/ADAM8/HIF1A/LYN/DOCK8/ADAM17/HCAR2/IL6	8	M1
GO:0055076	transition metal ion homeostasis	8/399	105/17913	0.00240472	0.0182649	0.0129414	SLC11A1/S100A9/FTH1/S100A8/HIF1A/SLC25A37/ATP6V0D1/FBXL5	8	M1
GO:0051149	positive regulation of muscle cell differentiation	8/399	111/17913	0.00339527	0.0229013	0.0162266	SOD2/EHD1/CTNNB1/TGFB1/SPAG9/CD53/RIPOR2/CAPN2	8	M1
GO:0030218	erythrocyte differentiation	8/399	112/17913	0.00358727	0.0240504	0.0170407	VEGFA/MAFB/FOXO3/HIF1A/LYN/STAT3/JMJD6/INHBA	8	M1
GO:1903510	mucopolysaccharide metabolic process	8/399	112/17913	0.00358727	0.0240504	0.0170407	CD44/VCAN/IL1B/TGFB1/B4GALT1/DSE/NFKB1/CSGALNACT2	8	M1
GO:0010508	positive regulation of autophagy	8/399	113/17913	0.00378757	0.0250488	0.0177482	C9orf72/RIPK2/LRRK2/FOXO3/HIF1A/PLK3/ZC3H12A/HK2	8	M1
GO:0060964	regulation of gene silencing by miRNA	8/399	113/17913	0.00378757	0.0250488	0.0177482	NEAT1/TGFB1/H3F3A/DDX5/STAT3/RANBP2/ZC3H12A/AGO2	8	M1
GO:0007173	epidermal growth factor receptor signaling pathway	8/399	115/17913	0.00421401	0.0267208	0.0189328	PLAUR/EREG/HBEGF/TGFB1/AREG/NCF1/ADAM17/IQGAP1	8	M1
GO:0060147	regulation of posttranscriptional gene silencing	8/399	117/17913	0.00467652	0.0291136	0.0206282	NEAT1/TGFB1/H3F3A/DDX5/STAT3/RANBP2/ZC3H12A/AGO2	8	M1
GO:0060966	regulation of gene silencing by RNA	8/399	117/17913	0.00467652	0.0291136	0.0206282	NEAT1/TGFB1/H3F3A/DDX5/STAT3/RANBP2/ZC3H12A/AGO2	8	M1
GO:0034101	erythrocyte homeostasis	8/399	120/17913	0.00544212	0.0322536	0.0228531	VEGFA/MAFB/FOXO3/HIF1A/LYN/STAT3/JMJD6/INHBA	8	M1
GO:1905477	positive regulation of protein localization to membrane	8/399	120/17913	0.00544212	0.0322536	0.0228531	ITGB2/TGFB1/BID/ITGAM/EZR/ITGB1/FYN/ACSL3	8	M1
GO:0003158	endothelium development	8/399	124/17913	0.00660741	0.0375095	0.0265771	ITGAX/BTG1/IL1B/KDM6B/CTNNB1/MSN/EZR/MYADM	8	M1
GO:0051668	localization within membrane	8/399	126/17913	0.00725646	0.0402182	0.0284963	PTPRC/ITGB2/FLNA/TGFB1/RILPL2/NUMB/GRASP/INSIG1	8	M1
GO:0010595	positive regulation of endothelial cell migration	8/399	129/17913	0.00831873	0.0437078	0.0309688	PTGS2/VEGFA/THBS1/TGFB1/HIF1A/ZC3H12A/ADAM17/MAP2K3	8	M1
GO:0045598	regulation of fat cell differentiation	8/399	131/17913	0.00908899	0.0466519	0.0330549	PTGS2/METRNL/SYAP1/TGFB1/CEBPB/ZC3H12A/INSIG1/IL6	8	M1
GO:0006140	regulation of nucleotide metabolic process	8/399	132/17913	0.0094935	0.047953	0.0339767	PPIF/TSPO/HIF1A/PFKFB3/PRKAG2/STAT3/RANBP2/CDA	8	M1
GO:0007292	female gamete generation	8/399	132/17913	0.0094935	0.047953	0.0339767	PTGS2/EREG/CTNNB1/FOXO3/H3F3A/PTX3/TNFAIP6/INHBA	8	M1
GO:0038127	ERBB signaling pathway	8/399	138/17913	0.0122078	0.0581428	0.0411966	PLAUR/EREG/HBEGF/TGFB1/AREG/NCF1/ADAM17/IQGAP1	8	M1
GO:0060968	regulation of gene silencing	8/399	139/17913	0.0127104	0.059597	0.042227	NEAT1/TGFB1/H3F3A/DDX5/STAT3/RANBP2/ZC3H12A/AGO2	8	M1
GO:0050777	negative regulation of immune response	8/399	143/17913	0.0148734	0.0676688	0.0479462	SAMSN1/CD55/PTPRC/SERPINB9/TGFB1/TNFAIP3/LYN/ZC3H12A	8	M1
GO:0035148	tube formation	8/399	144/17913	0.0154535	0.069624	0.0493316	VEGFA/CTNNB1/TGFB1/VASP/RARA/HIF1A/ZEB2/ADM	8	M1
GO:1903900	regulation of viral life cycle	8/399	147/17913	0.0172921	0.0761874	0.053982	FCN1/CXCL8/IFITM2/DDX5/APOBEC3A/VPS37B/ZC3H12A/PTX3	8	M1
GO:0008643	carbohydrate transport	8/399	148/17913	0.0179385	0.077346	0.0548029	SLC2A3/IL1B/AQP9/EZR/SLC2A6/PRKAG2/PRKCB/HK2	8	M1
GO:0070304	positive regulation of stress-activated protein kinase signaling cascade	8/399	156/17913	0.0237462	0.0920338	0.0652099	IL1B/VEGFA/RIPK2/MAP3K2/LYN/NCF1/ZEB2/ZC3H12A	8	M1
GO:0051302	regulation of cell division	8/399	162/17913	0.0288894	0.104571	0.0740932	IL1B/EREG/VEGFA/EVI2B/TGFB1/PLK3/OSM/IL1A	8	M1
GO:0016241	regulation of macroautophagy	8/399	166/17913	0.0327169	0.113984	0.0807626	C9orf72/RIPK2/LRRK2/HIF1A/ATP6V0D1/PRKAG2/ATP6V1B2/QSOX1	8	M1
GO:0021543	pallium development	8/399	166/17913	0.0327169	0.113984	0.0807626	BCL2A1/KDM6B/FLNA/CTNNB1/NDEL1/RARA/HIF1A/ZEB2	8	M1
GO:0048469	cell maturation	8/399	167/17913	0.0337252	0.115989	0.0821834	EREG/VEGFA/CTNNB1/LRRK2/FOXO3/CDKN1A/HIF1A/POU2F2	8	M1
GO:0022408	negative regulation of cell-cell adhesion	8/399	169/17913	0.0358048	0.121863	0.0863449	LILRB2/TGFB1/IL1RN/RIPOR2/VSIR/CEBPB/MYADM/ZC3H12A	8	M1
GO:0061138	morphogenesis of a branching epithelium	8/399	178/17913	0.0462309	0.145227	0.1029	VEGFA/CTSH/CTNNB1/SOCS3/TGFB1/AREG/RXRA/ADM	8	M1
GO:0009156	ribonucleoside monophosphate biosynthetic process	8/399	188/17913	0.0599452	0.172352	0.122119	UPP1/TGFB1/HIF1A/PFKFB3/PRKAG2/STAT3/RANBP2/HK2	8	M1
GO:0016197	endosomal transport	8/399	188/17913	0.0599452	0.172352	0.122119	EHD1/LRRK2/SPAG9/SNX18/VPS37B/TOM1/GRASP/EHD4	8	M1
GO:0006694	steroid biosynthetic process	8/399	190/17913	0.0629648	0.177363	0.125669	IL1B/TSPO/NFKB1/PRKAG2/SNAI1/INSIG1/ADM/CES1	8	M1
GO:0009746	response to hexose	8/399	195/17913	0.070923	0.19176	0.13587	NAMPT/PTGS2/THBS1/TGFB1/PIM3/FOXO3/HIF1A/MAP4K4	8	M1
GO:0009124	nucleoside monophosphate biosynthetic process	8/399	196/17913	0.072585	0.193662	0.137218	UPP1/TGFB1/HIF1A/PFKFB3/PRKAG2/STAT3/RANBP2/HK2	8	M1
GO:0034284	response to monosaccharide	8/399	200/17913	0.0794685	0.205013	0.145261	NAMPT/PTGS2/THBS1/TGFB1/PIM3/FOXO3/HIF1A/MAP4K4	8	M1
GO:0046777	protein autophosphorylation	8/399	210/17913	0.09832	0.237389	0.1682	PTPRC/VEGFA/FGR/OXSR1/STK17B/LRRK2/LYN/IQGAP1	8	M1
GO:0046578	regulation of Ras protein signal transduction	8/399	215/17913	0.108617	0.253206	0.179407	FGD4/SPATA13/AKAP13/IQSEC1/RIPOR2/LYN/ITGB1/MAP4K4	8	M1
GO:0048588	developmental cell growth	8/399	216/17913	0.110745	0.256921	0.18204	VEGFA/C9orf72/CTNNB1/AKAP13/NDEL1/ITGB1/ZEB2/IQGAP1	8	M1
GO:0043393	regulation of protein binding	8/399	217/17913	0.112896	0.260777	0.184771	CARD16/RIPK2/SYAP1/LRRK2/RIPOR2/ANXA2/PHLDA2/CCPG1	8	M1
GO:0048738	cardiac muscle tissue development	8/399	221/17913	0.121723	0.275629	0.195295	VEGFA/KDM6B/TGFB1/AKAP13/RARA/ITGB1/JARID2/RXRA	8	M1
GO:0110053	regulation of actin filament organization	8/399	228/17913	0.138019	0.305678	0.216586	FLNA/S100A10/CORO1A/C9orf72/VASP/CAPG/PLEK/MYADM	8	M1
GO:0010594	regulation of endothelial cell migration	8/399	231/17913	0.145324	0.316805	0.22447	PTGS2/VEGFA/THBS1/TGFB1/HIF1A/ZC3H12A/ADAM17/MAP2K3	8	M1
GO:0018105	peptidyl-serine phosphorylation	8/399	231/17913	0.145324	0.316805	0.22447	CD44/PTGS2/VEGFA/RIPK2/TGFB1/LRRK2/OSM/IL6	8	M1
GO:0098742	cell-cell adhesion via plasma-membrane adhesion molecules	8/399	233/17913	0.150298	0.326996	0.231691	JAML/ITGB2/SELL/ITGAM/IL1RN/ITGB1/MYADM/ITGA5	8	M1
GO:0030072	peptide hormone secretion	8/399	241/17913	0.170996	0.359375	0.254632	IL1B/PIM3/IL1RN/HIF1A/TCIRG1/MAP4K4/FFAR2/IL6	8	M1
GO:0071383	cellular response to steroid hormone stimulus	8/399	243/17913	0.176364	0.365642	0.259073	ATP2B1/CTNNB1/TGFB1/FOXO3/AKAP13/RARA/DDX5/RXRA	8	M1
GO:0007611	learning or memory	8/399	247/17913	0.187319	0.383799	0.271938	PTGS2/LILRB2/TLR2/HIF1A/ITGB1/CEBPB/FYN/ITGA5	8	M1
GO:0008016	regulation of heart contraction	8/399	249/17913	0.192904	0.391328	0.277273	ATP2B1/FLNA/HBEGF/PDE4B/GCH1/ZC3H12A/ATP1B3/ADM	8	M1
GO:0018209	peptidyl-serine modification	8/399	252/17913	0.20141	0.391584	0.277454	CD44/PTGS2/VEGFA/RIPK2/TGFB1/LRRK2/OSM/IL6	8	M1
GO:0021700	developmental maturation	8/399	262/17913	0.230801	0.417411	0.295753	EREG/VEGFA/CTNNB1/LRRK2/FOXO3/CDKN1A/HIF1A/POU2F2	8	M1
GO:0072331	signal transduction by p53 class mediator	8/399	264/17913	0.236857	0.417411	0.295753	CD44/FOXO3/CDKN1A/PLK3/DDX5/PRKAG2/TAF13/SNAI1	8	M1
GO:0010976	positive regulation of neuron projection development	8/399	265/17913	0.239905	0.42104	0.298325	VEGFA/S100A9/SKIL/NDEL1/LYN/ZEB2/FYN/IQGAP1	8	M1
GO:0043270	positive regulation of ion transport	8/399	266/17913	0.242967	0.425299	0.301343	CTSS/ATP2B1/IL1B/LILRA5/FLNA/TSPO/CEBPB/ATP1B3	8	M1
GO:0000082	G1/S transition of mitotic cell cycle	8/399	269/17913	0.252229	0.428036	0.303282	BID/CDKN1A/BACH1/ITGB1/PLK3/CCNH/ADAM17/INHBA	8	M1
GO:0009410	response to xenobiotic stimulus	8/399	270/17913	0.255341	0.429759	0.304502	S100A12/ACSL1/CYP1B1/TGFB1/FOXO3/APOBEC3A/RANBP2/CES1	8	M1
GO:0031647	regulation of protein stability	8/399	272/17913	0.261602	0.436494	0.309275	FLNA/RNF149/CTSH/LRRK2/CDKN1A/CCNH/USP3/ATP1B3	8	M1
GO:0005996	monosaccharide metabolic process	8/399	277/17913	0.27745	0.445865	0.315915	SLC2A3/B4GALT1/PFKFB3/CREM/TKT/RANBP2/PHLDA2/HK2	8	M1
GO:0048511	rhythmic process	8/399	287/17913	0.309872	0.466909	0.330825	NAMPT/EREG/FOXO3/NFKB2/DDX5/CREM/PTX3/INHBA	8	M1
GO:0044843	cell cycle G1/S phase transition	8/399	288/17913	0.31316	0.471384	0.333996	BID/CDKN1A/BACH1/ITGB1/PLK3/CCNH/ADAM17/INHBA	8	M1
GO:0006650	glycerophospholipid metabolic process	8/399	300/17913	0.353091	0.499042	0.353593	PLBD1/PNPLA8/GPAT3/PLEK/LPCAT1/CAPN2/ACSL3/FPR2	8	M1
GO:0048193	Golgi vesicle transport	8/399	304/17913	0.366548	0.508047	0.359973	SERPINA1/CD55/LRRK2/AREG/F5/RAB31/ACSL3/INSIG1	8	M1
GO:0003002	regionalization	8/399	318/17913	0.413899	0.545439	0.386467	ETS2/CTNNB1/MAFB/BASP1/ITGAM/ATP6AP2/ZEB2/SNAI1	8	M1
GO:0007178	transmembrane receptor protein serine/threonine kinase signaling pathway	8/399	323/17913	0.430812	0.554257	0.392715	THBS1/TGFB1/SKIL/USP15/VIM/DDX5/ADAM17/INHBA	8	M1
GO:0006790	sulfur compound metabolic process	8/399	346/17913	0.507558	0.610016	0.432223	VCAN/ACSL1/KYNU/B4GALT1/DSE/CSGALNACT2/ACOT9/ACSL3	8	M1
GO:0006605	protein targeting	8/399	364/17913	0.565263	0.649731	0.460362	ITGB2/LRRK2/BID/ITGAM/TSPO/NCF1/FYN/RAB27A	8	M1
GO:0006401	RNA catabolic process	8/399	368/17913	0.57769	0.66079	0.468198	SLC11A1/TNFRSF1B/MYD88/VIM/DDX5/ZC3H12A/NAF1/AGO2	8	M1
GO:0008544	epidermis development	8/399	452/17913	0.792332	0.832801	0.590076	EREG/FOSL2/CTNNB1/RIPOR2/LAMB3/SNAI1/CSTA/INHBA	8	M1
GO:0043372	positive regulation of CD4-positive, alpha-beta T cell differentiation	7/399	30/17913	3.37e-06	8.98e-05	6.36e-05	NLRP3/RIPK2/NFKBIZ/RARA/CD86/MALT1/SASH3	7	M1
GO:0002675	positive regulation of acute inflammatory response	7/399	31/17913	4.28e-06	0.000106789	7.57e-05	PTGS2/IL1B/FCER1G/ADAM8/OSM/FFAR2/IL6	7	M1
GO:0042554	superoxide anion generation	7/399	33/17913	6.69e-06	0.000158072	0.000112001	NCF2/ITGB2/CYBB/TGFB1/ITGAM/NCF1/FPR2	7	M1
GO:0034142	toll-like receptor 4 signaling pathway	7/399	34/17913	8.26e-06	0.000183654	0.000130127	ITGB2/RIPK2/NFKBIA/CD14/ITGAM/TNFAIP3/LYN	7	M1
GO:0045730	respiratory burst	7/399	34/17913	8.26e-06	0.000183654	0.000130127	SLC11A1/CD55/CD52/NCF2/CYBB/SELENOK/NCF1	7	M1
GO:0045622	regulation of T-helper cell differentiation	7/399	35/17913	1.01e-05	0.000217466	0.000154084	NLRP3/RIPK2/NFKBIZ/RARA/CD86/MALT1/ZC3H12A	7	M1
GO:0006911	phagocytosis, engulfment	7/399	41/17913	3.02e-05	0.000563623	0.000399351	ITGB2/FCER1G/THBS1/ITGAM/BIN2/RAB31/MYH9	7	M1
GO:2000404	regulation of T cell migration	7/399	41/17913	3.02e-05	0.000563623	0.000399351	OXSR1/ADAM8/CCL20/SELENOK/RIPOR2/DOCK8/ADAM17	7	M1
GO:0043300	regulation of leukocyte degranulation	7/399	43/17913	4.16e-05	0.000744469	0.000527488	ITGB2/FGR/FCER1G/ITGAM/ADGRE2/LYN/STXBP2	7	M1
GO:0050706	regulation of interleukin-1 beta secretion	7/399	44/17913	4.86e-05	0.000833516	0.000590582	NLRP3/LILRA5/CARD16/CASP1/RIPK2/TNFAIP3/ZC3H12A	7	M1
GO:0002762	negative regulation of myeloid leukocyte differentiation	7/399	48/17913	8.64e-05	0.00136739	0.000968858	LILRB3/CTNNB1/MAFB/RARA/LYN/TRIB1/INHBA	7	M1
GO:0009620	response to fungus	7/399	51/17913	0.000128351	0.00192743	0.00136567	S100A12/COTL1/S100A9/TGFB1/S100A8/MALT1/PTX3	7	M1
GO:0050702	interleukin-1 beta secretion	7/399	51/17913	0.000128351	0.00192743	0.00136567	NLRP3/LILRA5/CARD16/CASP1/RIPK2/TNFAIP3/ZC3H12A	7	M1
GO:0007566	embryo implantation	7/399	52/17913	0.000145511	0.00214171	0.00151749	TIMP1/PTGS2/IL1B/H3F3A/VMP1/RXRA/AGO2	7	M1
GO:0038066	p38MAPK cascade	7/399	53/17913	0.000164484	0.0023509	0.00166572	IL1B/VEGFA/DUSP1/EZR/NCF1/ZC3H12A/MAP2K3	7	M1
GO:0045576	mast cell activation	7/399	57/17913	0.000261398	0.00347878	0.00246487	S100A12/FGR/FCER1G/LCP2/ADGRE2/LYN/STXBP2	7	M1
GO:0045123	cellular extravasation	7/399	59/17913	0.000324681	0.00410002	0.00290504	JAML/ITGB2/SELL/ADAM8/RIPOR2/ITGB1/BST1	7	M1
GO:0050766	positive regulation of phagocytosis	7/399	60/17913	0.000360629	0.00446517	0.00316377	SLC11A1/PTPRC/IL1B/RAB31/PTX3/FPR2/RAB27A	7	M1
GO:1990868	response to chemokine	7/399	60/17913	0.000360629	0.00446517	0.00316377	DUSP1/OXSR1/RIPOR2/HIF1A/CCRL2/DOCK8/ZC3H12A	7	M1
GO:1990869	cellular response to chemokine	7/399	60/17913	0.000360629	0.00446517	0.00316377	DUSP1/OXSR1/RIPOR2/HIF1A/CCRL2/DOCK8/ZC3H12A	7	M1
GO:0002709	regulation of T cell mediated immunity	7/399	61/17913	0.000399694	0.00488088	0.00345832	PTPRC/TNFRSF1B/NLRP3/IL1B/MALT1/SASH3/IL6	7	M1
GO:2000378	negative regulation of reactive oxygen species metabolic process	7/399	64/17913	0.000537557	0.0062225	0.00440891	TSPO/HIF1A/FYN/STAT3/ZC3H12A/HK2/HP	7	M1
GO:0032418	lysosome localization	7/399	67/17913	0.000710821	0.00762504	0.00540267	FGR/FCER1G/ADGRE2/NDEL1/LYN/MYH9/STXBP2	7	M1
GO:0042531	positive regulation of tyrosine phosphorylation of STAT protein	7/399	67/17913	0.000710821	0.00762504	0.00540267	SOCS3/LYN/OSM/FYN/STAT3/IL6R/IL6	7	M1
GO:1903391	regulation of adherens junction organization	7/399	67/17913	0.000710821	0.00762504	0.00540267	VEGFA/S100A10/LIMS1/THBS1/IQSEC1/MAP4K4/IQGAP1	7	M1
GO:0002532	production of molecular mediator involved in inflammatory response	7/399	72/17913	0.00109505	0.0105585	0.00748119	FCER1G/ALOX5/MYD88/GPSM3/LYN/IL1R2/ZC3H12A	7	M1
GO:0032677	regulation of interleukin-8 production	7/399	72/17913	0.00109505	0.0105585	0.00748119	FCN1/PTPRC/IL1B/MYD88/TLR2/CD14/FFAR2	7	M1
GO:0050710	negative regulation of cytokine secretion	7/399	72/17913	0.00109505	0.0105585	0.00748119	NLRP3/LILRA5/CARD16/TNFAIP3/EZR/IL1R2/ZC3H12A	7	M1
GO:0030193	regulation of blood coagulation	7/399	74/17913	0.00128796	0.0118753	0.00841416	PLAUR/THBS1/LYN/PLEK/SERPINB2/THBD/F3	7	M1
GO:0032481	positive regulation of type I interferon production	7/399	74/17913	0.00128796	0.0118753	0.00841416	MYD88/CTNNB1/RIPK2/TLR2/NFKB2/LRRFIP1/NFKB1	7	M1
GO:0031100	animal organ regeneration	7/399	75/17913	0.00139388	0.0125168	0.00886866	C5AR1/SULF2/TGFB1/CDKN1A/CEBPB/LCP1/ADM	7	M1
GO:1900046	regulation of hemostasis	7/399	75/17913	0.00139388	0.0125168	0.00886866	PLAUR/THBS1/LYN/PLEK/SERPINB2/THBD/F3	7	M1
GO:1901224	positive regulation of NIK/NF-kappaB signaling	7/399	75/17913	0.00139388	0.0125168	0.00886866	IL1B/LIMS1/TLR2/CD14/MALT1/TNFRSF10B/NFAT5	7	M1
GO:1903201	regulation of oxidative stress-induced cell death	7/399	75/17913	0.00139388	0.0125168	0.00886866	SOD2/MCL1/CTNNB1/LRRK2/FOXO3/HIF1A/FYN	7	M1
GO:0014015	positive regulation of gliogenesis	7/399	76/17913	0.00150648	0.0132338	0.00937672	TNFRSF1B/IL1B/TLR2/TGFB1/TSPO/LYN/IL6	7	M1
GO:0048708	astrocyte differentiation	7/399	77/17913	0.00162605	0.0137149	0.00971762	C5AR1/IL1B/S100A8/VIM/STAT3/FPR2/IL6	7	M1
GO:0042590	antigen processing and presentation of exogenous peptide antigen via MHC class I	7/399	78/17913	0.00175286	0.0145099	0.0102809	NCF2/IFI30/CLEC4A/HLA-C/CYBB/HLA-B/NCF1	7	M1
GO:0042509	regulation of tyrosine phosphorylation of STAT protein	7/399	79/17913	0.00188723	0.0152523	0.0108069	SOCS3/LYN/OSM/FYN/STAT3/IL6R/IL6	7	M1
GO:0043154	negative regulation of cysteine-type endopeptidase activity involved in apoptotic process	7/399	79/17913	0.00188723	0.0152523	0.0108069	CD44/PLAUR/PTGS2/VEGFA/SERPINB9/CARD16/THBS1	7	M1
GO:0050818	regulation of coagulation	7/399	79/17913	0.00188723	0.0152523	0.0108069	PLAUR/THBS1/LYN/PLEK/SERPINB2/THBD/F3	7	M1
GO:0032637	interleukin-8 production	7/399	80/17913	0.00202945	0.0162246	0.0114959	FCN1/PTPRC/IL1B/MYD88/TLR2/CD14/FFAR2	7	M1
GO:0043536	positive regulation of blood vessel endothelial cell migration	7/399	80/17913	0.00202945	0.0162246	0.0114959	PTGS2/VEGFA/THBS1/TGFB1/HIF1A/ADAM17/MAP2K3	7	M1
GO:0007260	tyrosine phosphorylation of STAT protein	7/399	82/17913	0.00233864	0.0178613	0.0126555	SOCS3/LYN/OSM/FYN/STAT3/IL6R/IL6	7	M1
GO:0032651	regulation of interleukin-1 beta production	7/399	82/17913	0.00233864	0.0178613	0.0126555	NLRP3/LILRA5/CARD16/CASP1/RIPK2/TNFAIP3/ZC3H12A	7	M1
GO:2000106	regulation of leukocyte apoptotic process	7/399	82/17913	0.00233864	0.0178613	0.0126555	FCER1G/ADAM8/HIF1A/LYN/DOCK8/ADAM17/HCAR2	7	M1
GO:0046916	cellular transition metal ion homeostasis	7/399	83/17913	0.00250624	0.0187862	0.0133109	SLC11A1/S100A9/FTH1/S100A8/HIF1A/ATP6V0D1/FBXL5	7	M1
GO:0033138	positive regulation of peptidyl-serine phosphorylation	7/399	86/17913	0.00306485	0.0217277	0.015395	CD44/PTGS2/VEGFA/RIPK2/TGFB1/OSM/IL6	7	M1
GO:0048145	regulation of fibroblast proliferation	7/399	86/17913	0.00306485	0.0217277	0.015395	S100A6/EREG/FOSL2/CTNNB1/TGFB1/FTH1/CDKN1A	7	M1
GO:0061097	regulation of protein tyrosine kinase activity	7/399	86/17913	0.00306485	0.0217277	0.015395	PTPRC/EREG/LILRA5/NCF1/FYN/NEDD9/ADAM17	7	M1
GO:0001892	embryonic placenta development	7/399	87/17913	0.00327073	0.0224817	0.0159293	SOCS3/HIF1A/CEBPB/PHLDA2/SNAI1/JUNB/ADM	7	M1
GO:0048144	fibroblast proliferation	7/399	87/17913	0.00327073	0.0224817	0.0159293	S100A6/EREG/FOSL2/CTNNB1/TGFB1/FTH1/CDKN1A	7	M1
GO:0015908	fatty acid transport	7/399	90/17913	0.00395204	0.0258335	0.0183042	IL1B/PNPLA8/ACSL1/THBS1/PRKAG2/PLIN2/ACSL3	7	M1
GO:0034333	adherens junction assembly	7/399	90/17913	0.00395204	0.0258335	0.0183042	VEGFA/S100A10/LIMS1/CTNNB1/THBS1/MAP4K4/IQGAP1	7	M1
GO:0045639	positive regulation of myeloid cell differentiation	7/399	90/17913	0.00395204	0.0258335	0.0183042	EVI2B/TGFB1/FOXO3/HIF1A/STAT3/TRIB1/INHBA	7	M1
GO:1901888	regulation of cell junction assembly	7/399	90/17913	0.00395204	0.0258335	0.0183042	VEGFA/S100A10/LIMS1/THBS1/MAP4K4/SNAI1/IQGAP1	7	M1
GO:1901216	positive regulation of neuron death	7/399	93/17913	0.0047359	0.0293517	0.0207969	ITGB2/MCL1/CTNNB1/FOXO3/ITGAM/FYN/CAPN2	7	M1
GO:0002474	antigen processing and presentation of peptide antigen via MHC class I	7/399	95/17913	0.00532001	0.0318127	0.0225407	NCF2/IFI30/CLEC4A/HLA-C/CYBB/HLA-B/NCF1	7	M1
GO:0001909	leukocyte mediated cytotoxicity	7/399	97/17913	0.00595656	0.0346103	0.0245229	PTPRC/SERPINB9/CORO1A/CTSH/ITGAM/STXBP2/RAB27A	7	M1
GO:0070301	cellular response to hydrogen peroxide	7/399	99/17913	0.00664833	0.0376457	0.0266736	PPIF/KDM6B/CYP1B1/LRRK2/FOXO3/TNFAIP3/IL6	7	M1
GO:0048661	positive regulation of smooth muscle cell proliferation	7/399	101/17913	0.00739812	0.0405483	0.0287302	NAMPT/PTGS2/EREG/HBEGF/THBS1/IL6R/IL6	7	M1
GO:0032963	collagen metabolic process	7/399	102/17913	0.00779565	0.0422066	0.0299052	CTSS/TGFB1/HIF1A/VSIR/ITGB1/VIM/IL6	7	M1
GO:0045446	endothelial cell differentiation	7/399	105/17913	0.0090829	0.0466519	0.0330549	BTG1/IL1B/KDM6B/CTNNB1/MSN/EZR/MYADM	7	M1
GO:0006024	glycosaminoglycan biosynthetic process	7/399	107/17913	0.0100234	0.0499486	0.0353907	VCAN/IL1B/TGFB1/B4GALT1/DSE/NFKB1/CSGALNACT2	7	M1
GO:0006023	aminoglycan biosynthetic process	7/399	108/17913	0.0105194	0.0520843	0.0369039	VCAN/IL1B/TGFB1/B4GALT1/DSE/NFKB1/CSGALNACT2	7	M1
GO:1903578	regulation of ATP metabolic process	7/399	110/17913	0.0115646	0.0558141	0.0395467	PPIF/TSPO/HIF1A/PFKFB3/PRKAG2/STAT3/RANBP2	7	M1
GO:0051817	modification of morphology or physiology of other organism involved in symbiotic interaction	7/399	113/17913	0.0132704	0.0616373	0.0436727	SERPINB9/CHD1/TGFB1/ANXA2/RXRA/ZC3H12A/PTX3	7	M1
GO:1903825	organic acid transmembrane transport	7/399	113/17913	0.0132704	0.0616373	0.0436727	SLC43A2/AQP9/SLC7A7/THBS1/SLC7A5/PRKAG2/SLC16A3	7	M1
GO:1905039	carboxylic acid transmembrane transport	7/399	113/17913	0.0132704	0.0616373	0.0436727	SLC43A2/AQP9/SLC7A7/THBS1/SLC7A5/PRKAG2/SLC16A3	7	M1
GO:0009116	nucleoside metabolic process	7/399	114/17913	0.0138771	0.0639485	0.0453103	TYMP/UPP1/LRRK2/PNP/APOBEC3A/ADA2/CDA	7	M1
GO:0051193	regulation of cofactor metabolic process	7/399	114/17913	0.0138771	0.0639485	0.0453103	HIF1A/PFKFB3/FYN/PRKAG2/STAT3/RANBP2/HP	7	M1
GO:0022612	gland morphogenesis	7/399	116/17913	0.0151497	0.0684352	0.0484893	SULF2/TGFB1/MSN/TNFAIP3/AREG/CEBPB/RXRA	7	M1
GO:0072089	stem cell proliferation	7/399	116/17913	0.0151497	0.0684352	0.0484893	PTPRC/VEGFA/CTNNB1/TGFB1/LRRK2/HIF1A/NUMB	7	M1
GO:0001952	regulation of cell-matrix adhesion	7/399	117/17913	0.0158161	0.0707983	0.0501636	VEGFA/S100A10/LIMS1/THBS1/BST1/MAP4K4/IQGAP1	7	M1
GO:0043280	positive regulation of cysteine-type endopeptidase activity involved in apoptotic process	7/399	118/17913	0.0165032	0.0732832	0.0519243	NLRP3/CTSH/CASP1/S100A9/S100A8/TNFRSF10B/F3	7	M1
GO:0033135	regulation of peptidyl-serine phosphorylation	7/399	119/17913	0.017211	0.0761225	0.053936	CD44/PTGS2/VEGFA/RIPK2/TGFB1/OSM/IL6	7	M1
GO:0001838	embryonic epithelial tube formation	7/399	120/17913	0.0179401	0.077346	0.0548029	CTNNB1/TGFB1/VASP/RARA/HIF1A/ZEB2/ADM	7	M1
GO:0055007	cardiac muscle cell differentiation	7/399	121/17913	0.0186906	0.0803479	0.0569299	VEGFA/KDM6B/TGFB1/AKAP13/RARA/ITGB1/RXRA	7	M1
GO:0042552	myelination	7/399	122/17913	0.0194629	0.0811357	0.0574882	ITGAX/TNFRSF1B/TYMP/CTNNB1/TLR2/TGFB1/RARA	7	M1
GO:0007272	ensheathment of neurons	7/399	126/17913	0.0227753	0.0908762	0.0643897	ITGAX/TNFRSF1B/TYMP/CTNNB1/TLR2/TGFB1/RARA	7	M1
GO:0008366	axon ensheathment	7/399	126/17913	0.0227753	0.0908762	0.0643897	ITGAX/TNFRSF1B/TYMP/CTNNB1/TLR2/TGFB1/RARA	7	M1
GO:0008286	insulin receptor signaling pathway	7/399	128/17913	0.0245693	0.0941334	0.0666975	IL1B/PTPRE/NDEL1/TCIRG1/ATP6V0D1/ATP6V1B2/PRKCB	7	M1
GO:0032355	response to estradiol	7/399	128/17913	0.0245693	0.0941334	0.0666975	PTGS2/DUSP1/CTNNB1/TGFB1/RARA/AREG/STAT3	7	M1
GO:0045667	regulation of osteoblast differentiation	7/399	128/17913	0.0245693	0.0941334	0.0666975	CTNNB1/AREG/TCIRG1/CEBPB/DDX5/IL6R/IL6	7	M1
GO:0072175	epithelial tube formation	7/399	128/17913	0.0245693	0.0941334	0.0666975	CTNNB1/TGFB1/VASP/RARA/HIF1A/ZEB2/ADM	7	M1
GO:1900542	regulation of purine nucleotide metabolic process	7/399	128/17913	0.0245693	0.0941334	0.0666975	PPIF/TSPO/HIF1A/PFKFB3/PRKAG2/STAT3/RANBP2	7	M1
GO:0008037	cell recognition	7/399	129/17913	0.0255017	0.096802	0.0685884	FCN1/VCAN/CLEC7A/MSN/B4GALT1/DOCK8/JMJD6	7	M1
GO:1903364	positive regulation of cellular protein catabolic process	7/399	129/17913	0.0255017	0.096802	0.0685884	MSN/LRRK2/TNFAIP3/EZR/PLK3/FBXL5/TRIB1	7	M1
GO:0006766	vitamin metabolic process	7/399	130/17913	0.0264581	0.0992456	0.0703198	SLC2A3/IL1B/KYNU/VNN2/NFKB1/RXRA/SNAI1	7	M1
GO:0046683	response to organophosphorus	7/399	130/17913	0.0264581	0.0992456	0.0703198	PTGS2/IL1B/AQP9/DUSP1/EZR/AREG/THBD	7	M1
GO:0042770	signal transduction in response to DNA damage	7/399	131/17913	0.0274386	0.102658	0.0727375	CD44/FOXO3/BID/CDKN1A/PLK3/DDX5/SNAI1	7	M1
GO:1901657	glycosyl compound metabolic process	7/399	132/17913	0.0284435	0.103747	0.0735091	TYMP/UPP1/LRRK2/PNP/APOBEC3A/ADA2/CDA	7	M1
GO:0051017	actin filament bundle assembly	7/399	136/17913	0.0327119	0.113984	0.0807626	FLNA/S100A10/EZR/PHACTR1/PLEK/NEDD9/LCP1	7	M1
GO:0071901	negative regulation of protein serine/threonine kinase activity	7/399	136/17913	0.0327119	0.113984	0.0807626	IL1B/DUSP1/CDKN1A/TNFAIP3/LYN/DUSP6/PRKAG2	7	M1
GO:0061572	actin filament bundle organization	7/399	137/17913	0.0338422	0.115989	0.0821834	FLNA/S100A10/EZR/PHACTR1/PLEK/NEDD9/LCP1	7	M1
GO:0072006	nephron development	7/399	142/17913	0.0398831	0.131611	0.0932522	VEGFA/SULF2/CTNNB1/TGFB1/BASP1/IL6R/IQGAP1	7	M1
GO:0062013	positive regulation of small molecule metabolic process	7/399	143/17913	0.0411703	0.134957	0.0956231	PTGS2/IL1B/HIF1A/PFKFB3/NFKB1/STAT3/ADM	7	M1
GO:0106106	cold-induced thermogenesis	7/399	143/17913	0.0411703	0.134957	0.0956231	G0S2/VEGFA/KDM6B/ACSL1/CEBPB/TLE3/ADAM17	7	M1
GO:0120161	regulation of cold-induced thermogenesis	7/399	143/17913	0.0411703	0.134957	0.0956231	G0S2/VEGFA/KDM6B/ACSL1/CEBPB/TLE3/ADAM17	7	M1
GO:0043467	regulation of generation of precursor metabolites and energy	7/399	144/17913	0.0424843	0.13724	0.0972408	PPIF/HIF1A/PFKFB3/PRKAG2/STAT3/RANBP2/PHLDA2	7	M1
GO:1903169	regulation of calcium ion transmembrane transport	7/399	144/17913	0.0424843	0.13724	0.0972408	CORO1A/PDE4B/AHNAK/TGFB1/LYN/FYN/DIAPH1	7	M1
GO:0014074	response to purine-containing compound	7/399	145/17913	0.0438252	0.139844	0.0990857	PTGS2/IL1B/AQP9/DUSP1/EZR/AREG/THBD	7	M1
GO:0016331	morphogenesis of embryonic epithelium	7/399	146/17913	0.0451931	0.143283	0.101523	CTNNB1/TGFB1/VASP/RARA/HIF1A/ZEB2/ADM	7	M1
GO:0043524	negative regulation of neuron apoptotic process	7/399	146/17913	0.0451931	0.143283	0.101523	C5AR1/SOD2/CORO1A/ADAM8/HIF1A/CEBPB/FYN	7	M1
GO:0006090	pyruvate metabolic process	7/399	147/17913	0.0465882	0.146246	0.103622	HIF1A/PFKFB3/PRKAG2/STAT3/RANBP2/SLC16A3/HK2	7	M1
GO:1902600	proton transmembrane transport	7/399	148/17913	0.0480105	0.14901	0.10558	PPIF/SLC15A3/C15orf48/SLC2A6/TCIRG1/ATP6V0D1/ATP6V1B2	7	M1
GO:0006754	ATP biosynthetic process	7/399	150/17913	0.0509374	0.155293	0.110032	TGFB1/HIF1A/PFKFB3/PRKAG2/STAT3/RANBP2/HK2	7	M1
GO:1990845	adaptive thermogenesis	7/399	152/17913	0.0539747	0.160763	0.113907	G0S2/VEGFA/KDM6B/ACSL1/CEBPB/TLE3/ADAM17	7	M1
GO:0031214	biomineral tissue development	7/399	154/17913	0.057123	0.168042	0.119065	ATP2B1/PTGS2/FGR/TGFB1/HIF1A/TCIRG1/CEBPB	7	M1
GO:0035051	cardiocyte differentiation	7/399	154/17913	0.057123	0.168042	0.119065	VEGFA/KDM6B/TGFB1/AKAP13/RARA/ITGB1/RXRA	7	M1
GO:0021915	neural tube development	7/399	155/17913	0.058739	0.172227	0.12203	TGFB1/VASP/RARA/HIF1A/ATP6AP2/ZEB2/ADM	7	M1
GO:0032874	positive regulation of stress-activated MAPK cascade	7/399	155/17913	0.058739	0.172227	0.12203	IL1B/VEGFA/RIPK2/MAP3K2/NCF1/ZEB2/ZC3H12A	7	M1
GO:0009408	response to heat	7/399	158/17913	0.063755	0.179361	0.127085	PTGS2/THBS1/CD14/CDKN1A/LYN/IL1A/RANBP2	7	M1
GO:0043535	regulation of blood vessel endothelial cell migration	7/399	158/17913	0.063755	0.179361	0.127085	PTGS2/VEGFA/THBS1/TGFB1/HIF1A/ADAM17/MAP2K3	7	M1
GO:0009206	purine ribonucleoside triphosphate biosynthetic process	7/399	159/17913	0.0654831	0.182332	0.12919	TGFB1/HIF1A/PFKFB3/PRKAG2/STAT3/RANBP2/HK2	7	M1
GO:0009145	purine nucleoside triphosphate biosynthetic process	7/399	160/17913	0.0672393	0.184493	0.130721	TGFB1/HIF1A/PFKFB3/PRKAG2/STAT3/RANBP2/HK2	7	M1
GO:0048015	phosphatidylinositol-mediated signaling	7/399	160/17913	0.0672393	0.184493	0.130721	FGR/EZR/LYN/IER3/NCF1/OSM/FYN	7	M1
GO:0003018	vascular process in circulatory system	7/399	161/17913	0.0690237	0.188343	0.133449	ATP2B1/PTGS2/SOD2/GCH1/TGFB1/SCPEP1/ADM	7	M1
GO:0048017	inositol lipid-mediated signaling	7/399	163/17913	0.0726769	0.19379	0.137309	FGR/EZR/LYN/IER3/NCF1/OSM/FYN	7	M1
GO:0009201	ribonucleoside triphosphate biosynthetic process	7/399	164/17913	0.0745457	0.197118	0.139667	TGFB1/HIF1A/PFKFB3/PRKAG2/STAT3/RANBP2/HK2	7	M1
GO:0030307	positive regulation of cell growth	7/399	166/17913	0.0783676	0.203278	0.144031	VEGFA/HBEGF/S100A9/H3F3A/NDEL1/S100A8/ADAM17	7	M1
GO:2001252	positive regulation of chromosome organization	7/399	169/17913	0.084311	0.213353	0.15117	IL1B/VEGFA/CTNNB1/TGFB1/LRRK2/JARID2/NAF1	7	M1
GO:0016064	immunoglobulin mediated immune response	7/399	171/17913	0.088413	0.219534	0.155549	CD55/PTPRC/FCER1G/TGFB1/FGL2/POU2F2/TCIRG1	7	M1
GO:0043433	negative regulation of DNA-binding transcription factor activity	7/399	171/17913	0.088413	0.219534	0.155549	NLRP3/FLNA/NFKBIA/CYP1B1/TNFAIP3/ZC3H12A/TRIB1	7	M1
GO:0019724	B cell mediated immunity	7/399	173/17913	0.0926263	0.22697	0.160818	CD55/PTPRC/FCER1G/TGFB1/FGL2/POU2F2/TCIRG1	7	M1
GO:0009127	purine nucleoside monophosphate biosynthetic process	7/399	174/17913	0.0947744	0.231341	0.163915	TGFB1/HIF1A/PFKFB3/PRKAG2/STAT3/RANBP2/HK2	7	M1
GO:0009168	purine ribonucleoside monophosphate biosynthetic process	7/399	174/17913	0.0947744	0.231341	0.163915	TGFB1/HIF1A/PFKFB3/PRKAG2/STAT3/RANBP2/HK2	7	M1
GO:0009142	nucleoside triphosphate biosynthetic process	7/399	175/17913	0.0969501	0.234336	0.166037	TGFB1/HIF1A/PFKFB3/PRKAG2/STAT3/RANBP2/HK2	7	M1
GO:0010821	regulation of mitochondrion organization	7/399	175/17913	0.0969501	0.234336	0.166037	PLAUR/PPIF/LRRK2/BID/TSPO/HIF1A/HK2	7	M1
GO:0043409	negative regulation of MAPK cascade	7/399	179/17913	0.105926	0.248017	0.175731	PTPRC/IL1B/RNF149/DUSP1/EZR/LYN/DUSP6	7	M1
GO:0002040	sprouting angiogenesis	7/399	181/17913	0.110577	0.256665	0.181858	PTGS2/VEGFA/THBS1/ITGB1/RNF213/ITGA5/JMJD6	7	M1
GO:0070374	positive regulation of ERK1 and ERK2 cascade	7/399	186/17913	0.122668	0.277626	0.19671	CD44/C5AR1/PTPRC/RIPK2/TGFB1/GLIPR2/FPR2	7	M1
GO:0060348	bone development	7/399	189/17913	0.130234	0.291046	0.206219	PTPRC/SULF2/TGFB1/AKAP13/RARA/ANXA2/INSIG1	7	M1
GO:0016051	carbohydrate biosynthetic process	7/399	194/17913	0.143349	0.314197	0.222622	TGFB1/B4GALT1/NFKB1/CSGALNACT2/PLEK/TKT/RANBP2	7	M1
GO:0007254	JNK cascade	7/399	200/17913	0.159886	0.341695	0.242105	IL1B/RIPK2/MAP3K2/NCF1/ZEB2/MAP4K4/TRIB1	7	M1
GO:2001020	regulation of response to DNA damage stimulus	7/399	201/17913	0.162723	0.34641	0.245446	CD44/MCL1/BID/SKIL/IER3/DDX5/SNAI1	7	M1
GO:0035303	regulation of dephosphorylation	7/399	206/17913	0.177244	0.367295	0.260244	PTPRC/LILRB2/TGFB1/PPP1R15A/PHACTR1/PLEK/IQGAP1	7	M1
GO:0006839	mitochondrial transport	7/399	224/17913	0.23364	0.417411	0.295753	PPIF/LRRK2/BID/TSPO/PRKAG2/STAT3/HK2	7	M1
GO:0098656	anion transmembrane transport	7/399	224/17913	0.23364	0.417411	0.295753	SLC43A2/AQP9/SLC7A7/THBS1/SLC7A5/PRKAG2/SLC16A3	7	M1
GO:0006352	DNA-templated transcription, initiation	7/399	231/17913	0.25704	0.430972	0.305362	CTNNB1/CDKN1A/RARA/CCNH/RXRA/TAF13/TWISTNB	7	M1
GO:0071560	cellular response to transforming growth factor beta stimulus	7/399	233/17913	0.26385	0.436692	0.309415	LIMS1/THBS1/TGFB1/SKIL/USP15/FYN/ADAM17	7	M1
GO:0048863	stem cell differentiation	7/399	237/17913	0.277618	0.445975	0.315992	PTPRC/HIF1A/OSM/ZEB2/STAT3/JARID2/ZNF281	7	M1
GO:0071559	response to transforming growth factor beta	7/399	239/17913	0.28457	0.449552	0.318527	LIMS1/THBS1/TGFB1/SKIL/USP15/FYN/ADAM17	7	M1
GO:0045926	negative regulation of growth	7/399	244/17913	0.302127	0.459877	0.325842	BTG1/TGFB1/CDKN1A/HIF1A/JARID2/CDA/INHBA	7	M1
GO:0045017	glycerolipid biosynthetic process	7/399	246/17913	0.309213	0.466074	0.330233	GPAT3/ACSL1/GK/LPCAT1/CAPN2/ACSL3/FPR2	7	M1
GO:0003007	heart morphogenesis	7/399	249/17913	0.319901	0.473514	0.335505	VEGFA/CTNNB1/TGFB1/RARA/HIF1A/RXRA/SNAI1	7	M1
GO:0090596	sensory organ morphogenesis	7/399	250/17913	0.323479	0.47722	0.338131	VEGFA/CTNNB1/MAFB/RIPOR2/HIF1A/STAT3/INSIG1	7	M1
GO:2000027	regulation of animal organ morphogenesis	7/399	250/17913	0.323479	0.47722	0.338131	VEGFA/SULF2/CTNNB1/TGFB1/BASP1/TNFAIP3/RXRA	7	M1
GO:0051650	establishment of vesicle localization	7/399	253/17913	0.334248	0.483953	0.342901	SERPINA1/CTNNB1/LRRK2/AREG/F5/PRKCB/RAB27A	7	M1
GO:0051648	vesicle localization	7/399	270/17913	0.395963	0.530137	0.375625	SERPINA1/CTNNB1/LRRK2/AREG/F5/PRKCB/RAB27A	7	M1
GO:1903311	regulation of mRNA metabolic process	7/399	275/17913	0.414185	0.545439	0.386467	SLC11A1/MYD88/VIM/DDX5/ZC3H12A/AGO2/JMJD6	7	M1
GO:0090068	positive regulation of cell cycle process	7/399	283/17913	0.443248	0.561964	0.398176	IL1B/EREG/TGFB1/CDKN1A/PLK3/IL1A/ADAM17	7	M1
GO:0016042	lipid catabolic process	7/399	300/17913	0.504027	0.60699	0.430079	PLBD1/IL1B/PNPLA8/CYP1B1/AOAH/HCAR2/CYP4F3	7	M1
GO:0018205	peptidyl-lysine modification	7/399	376/17913	0.736004	0.785106	0.556282	IL1B/CTNNB1/TGFB1/TET2/JARID2/RANBP2/JMJD6	7	M1
GO:0048285	organelle fission	7/399	395/17913	0.780315	0.823286	0.583333	IL1B/EREG/FLNA/DUSP1/TGFB1/LRRK2/IL1A	7	M1
GO:0045624	positive regulation of T-helper cell differentiation	6/399	22/17913	6.49e-06	0.00015501	0.000109831	NLRP3/RIPK2/NFKBIZ/RARA/CD86/MALT1	6	M1
GO:0032753	positive regulation of interleukin-4 production	6/399	23/17913	8.61e-06	0.000188563	0.000133605	NLRP3/FCER1G/RARA/CD86/CEBPB/SASH3	6	M1
GO:0009299	mRNA transcription	6/399	24/17913	1.13e-05	0.000239634	0.000169791	C5AR1/EREG/FLNA/HIF1A/DDX5/STAT3	6	M1
GO:0072539	T-helper 17 cell differentiation	6/399	26/17913	1.86e-05	0.000369944	0.000262121	NLRP3/NFKBIZ/MALT1/STAT3/ZC3H12A/IL6	6	M1
GO:0032673	regulation of interleukin-4 production	6/399	27/17913	2.34e-05	0.000450595	0.000319266	NLRP3/FCER1G/RARA/CD86/CEBPB/SASH3	6	M1
GO:2000406	positive regulation of T cell migration	6/399	28/17913	2.92e-05	0.000550857	0.000390306	OXSR1/ADAM8/CCL20/SELENOK/DOCK8/ADAM17	6	M1
GO:0072538	T-helper 17 type immune response	6/399	29/17913	3.62e-05	0.000659251	0.000467107	NLRP3/NFKBIZ/MALT1/STAT3/ZC3H12A/IL6	6	M1
GO:0002724	regulation of T cell cytokine production	6/399	31/17913	5.4e-05	0.000899311	0.0006372	TNFRSF1B/NLRP3/IL1B/MALT1/SASH3/IL6	6	M1
GO:1903393	positive regulation of adherens junction organization	6/399	31/17913	5.4e-05	0.000899311	0.0006372	VEGFA/S100A10/LIMS1/IQSEC1/MAP4K4/IQGAP1	6	M1
GO:1903978	regulation of microglial cell activation	6/399	31/17913	5.4e-05	0.000899311	0.0006372	C5AR1/PTPRC/ITGB2/LRRK2/ITGAM/IL6	6	M1
GO:0009164	nucleoside catabolic process	6/399	32/17913	6.52e-05	0.00107018	0.00075827	TYMP/UPP1/PNP/APOBEC3A/ADA2/CDA	6	M1
GO:0032633	interleukin-4 production	6/399	32/17913	6.52e-05	0.00107018	0.00075827	NLRP3/FCER1G/RARA/CD86/CEBPB/SASH3	6	M1
GO:2000403	positive regulation of lymphocyte migration	6/399	34/17913	9.33e-05	0.00145965	0.00103422	OXSR1/ADAM8/CCL20/SELENOK/DOCK8/ADAM17	6	M1
GO:0090322	regulation of superoxide metabolic process	6/399	35/17913	0.00011046	0.00168726	0.0011955	ITGB2/GCH1/TGFB1/ITGAM/BST1/FPR2	6	M1
GO:0010955	negative regulation of protein processing	6/399	37/17913	0.000152375	0.00220621	0.00156319	CD55/CARD16/THBS1/LRRK2/CAST/IL1R2	6	M1
GO:1903318	negative regulation of protein maturation	6/399	37/17913	0.000152375	0.00220621	0.00156319	CD55/CARD16/THBS1/LRRK2/CAST/IL1R2	6	M1
GO:0002711	positive regulation of T cell mediated immunity	6/399	38/17913	0.000177581	0.00249793	0.00176989	PTPRC/NLRP3/IL1B/MALT1/SASH3/IL6	6	M1
GO:1901658	glycosyl compound catabolic process	6/399	38/17913	0.000177581	0.00249793	0.00176989	TYMP/UPP1/PNP/APOBEC3A/ADA2/CDA	6	M1
GO:0006509	membrane protein ectodomain proteolysis	6/399	40/17913	0.000237813	0.00318397	0.00225598	TIMP1/TNFRSF1B/IL1B/ADAM8/MYH9/ADAM17	6	M1
GO:0014002	astrocyte development	6/399	41/17913	0.000273408	0.0035744	0.00253262	C5AR1/IL1B/S100A8/VIM/FPR2/IL6	6	M1
GO:0002548	monocyte chemotaxis	6/399	44/17913	0.00040578	0.00494162	0.00350135	S100A12/DUSP1/LYN/IL6R/FPR2/IL6	6	M1
GO:0002448	mast cell mediated immunity	6/399	45/17913	0.000459527	0.00544493	0.00385797	FGR/FCER1G/SERPINB9/ADGRE2/LYN/STXBP2	6	M1
GO:0071675	regulation of mononuclear cell migration	6/399	45/17913	0.000459527	0.00544493	0.00385797	C5AR1/DUSP1/THBS1/TGFB1/LYN/FPR2	6	M1
GO:0032757	positive regulation of interleukin-8 production	6/399	46/17913	0.000518663	0.00601947	0.00426505	FCN1/IL1B/MYD88/TLR2/CD14/FFAR2	6	M1
GO:0045646	regulation of erythrocyte differentiation	6/399	47/17913	0.000583551	0.00658346	0.00466467	MAFB/FOXO3/HIF1A/LYN/STAT3/INHBA	6	M1
GO:1900744	regulation of p38MAPK cascade	6/399	47/17913	0.000583551	0.00658346	0.00466467	IL1B/VEGFA/DUSP1/EZR/NCF1/ZC3H12A	6	M1
GO:0034656	nucleobase-containing small molecule catabolic process	6/399	48/17913	0.000654567	0.00723269	0.00512467	TYMP/UPP1/PNP/APOBEC3A/ADA2/CDA	6	M1
GO:1903727	positive regulation of phospholipid metabolic process	6/399	48/17913	0.000654567	0.00723269	0.00512467	FGR/TGFB1/LYN/CAPN2/ACSL3/FPR2	6	M1
GO:2001238	positive regulation of extrinsic apoptotic signaling pathway	6/399	49/17913	0.000732096	0.00772961	0.00547676	G0S2/PTPRC/THBS1/BID/SKIL/INHBA	6	M1
GO:0010718	positive regulation of epithelial to mesenchymal transition	6/399	50/17913	0.000816536	0.0084407	0.0059806	IL1B/CTNNB1/TGFB1/GLIPR2/SNAI1/IL6	6	M1
GO:0070671	response to interleukin-12	6/399	50/17913	0.000816536	0.0084407	0.0059806	SOD2/RIPK2/MSN/ANXA2/SERPINB2/LCP1	6	M1
GO:0046456	icosanoid biosynthetic process	6/399	53/17913	0.00111544	0.0106937	0.00757698	PTGS2/IL1B/PNPLA8/ALOX5/LTA4H/ALOX5AP	6	M1
GO:0001541	ovarian follicle development	6/399	54/17913	0.0012317	0.0114538	0.00811548	EREG/VEGFA/FOXO3/CEBPB/PTX3/INHBA	6	M1
GO:0061098	positive regulation of protein tyrosine kinase activity	6/399	56/17913	0.00149179	0.0131567	0.00932212	EREG/LILRA5/NCF1/FYN/NEDD9/ADAM17	6	M1
GO:1903428	positive regulation of reactive oxygen species biosynthetic process	6/399	57/17913	0.00163654	0.0137773	0.00976182	PTGS2/IL1B/ITGB2/FOXO3/PTX3/RAB27A	6	M1
GO:0007405	neuroblast proliferation	6/399	58/17913	0.00179172	0.0147485	0.0104499	VEGFA/CTNNB1/TGFB1/LRRK2/HIF1A/NUMB	6	M1
GO:0033627	cell adhesion mediated by integrin	6/399	61/17913	0.0023246	0.017846	0.0126447	CYP1B1/LYN/ITGB1/FERMT3/ADAM17/ITGA5	6	M1
GO:0051893	regulation of focal adhesion assembly	6/399	61/17913	0.0023246	0.017846	0.0126447	VEGFA/S100A10/LIMS1/THBS1/MAP4K4/IQGAP1	6	M1
GO:0070988	demethylation	6/399	61/17913	0.0023246	0.017846	0.0126447	KDM6B/TET2/APOBEC3A/JARID2/KDM7A/JMJD6	6	M1
GO:0090109	regulation of cell-substrate junction assembly	6/399	61/17913	0.0023246	0.017846	0.0126447	VEGFA/S100A10/LIMS1/THBS1/MAP4K4/IQGAP1	6	M1
GO:0032729	positive regulation of interferon-gamma production	6/399	62/17913	0.0025263	0.0188097	0.0133275	SLC11A1/IL1B/PDE4B/RIPK2/CD14/SASH3	6	M1
GO:0038034	signal transduction in absence of ligand	6/399	62/17913	0.0025263	0.0188097	0.0133275	IL1B/MCL1/FOXO3/IL1A/FYN/INHBA	6	M1
GO:0097192	extrinsic apoptotic signaling pathway in absence of ligand	6/399	62/17913	0.0025263	0.0188097	0.0133275	IL1B/MCL1/FOXO3/IL1A/FYN/INHBA	6	M1
GO:0050854	regulation of antigen receptor-mediated signaling pathway	6/399	63/17913	0.00274086	0.0198746	0.014082	PTPRC/EZR/LYN/MALT1/NFAM1/PRKCB	6	M1
GO:0015909	long-chain fatty acid transport	6/399	64/17913	0.00296878	0.0211478	0.0149842	PNPLA8/ACSL1/THBS1/PRKAG2/PLIN2/ACSL3	6	M1
GO:0032945	negative regulation of mononuclear cell proliferation	6/399	65/17913	0.00321059	0.0224035	0.0158739	LILRB2/LST1/TGFB1/MNDA/VSIR/CEBPB	6	M1
GO:0045428	regulation of nitric oxide biosynthetic process	6/399	65/17913	0.00321059	0.0224035	0.0158739	PTGS2/IL1B/ITGB2/TSPO/ZC3H12A/PTX3	6	M1
GO:0050672	negative regulation of lymphocyte proliferation	6/399	65/17913	0.00321059	0.0224035	0.0158739	LILRB2/LST1/TGFB1/MNDA/VSIR/CEBPB	6	M1
GO:0072091	regulation of stem cell proliferation	6/399	68/17913	0.00402433	0.0262675	0.0186116	PTPRC/VEGFA/CTNNB1/TGFB1/LRRK2/HIF1A	6	M1
GO:0032720	negative regulation of tumor necrosis factor production	6/399	69/17913	0.00432674	0.02728	0.019329	CLEC4A/TNFAIP3/TSPO/RARA/VSIR/ZC3H12A	6	M1
GO:0033077	T cell differentiation in thymus	6/399	69/17913	0.00432674	0.02728	0.019329	PTPRC/CTNNB1/MAFB/ADAM8/ADAM17/JMJD6	6	M1
GO:0045454	cell redox homeostasis	6/399	69/17913	0.00432674	0.02728	0.019329	SLC11A1/SH3BGRL3/NCF2/CYBB/NCF1/QSOX1	6	M1
GO:0019674	NAD metabolic process	6/399	71/17913	0.00498143	0.0301258	0.0213454	NAMPT/PTGS2/KYNU/PNP/BST1/HK2	6	M1
GO:1903036	positive regulation of response to wounding	6/399	71/17913	0.00498143	0.0301258	0.0213454	HBEGF/THBS1/NDEL1/PLEK/THBD/F3	6	M1
GO:1903556	negative regulation of tumor necrosis factor superfamily cytokine production	6/399	71/17913	0.00498143	0.0301258	0.0213454	CLEC4A/TNFAIP3/TSPO/RARA/VSIR/ZC3H12A	6	M1
GO:0007492	endoderm development	6/399	73/17913	0.00570604	0.0336831	0.0238659	ITGB2/CTNNB1/TGFB1/LAMB3/ITGA5/INHBA	6	M1
GO:0050688	regulation of defense response to virus	6/399	73/17913	0.00570604	0.0336831	0.0238659	IL1B/FGL2/TNFAIP3/SELENOK/BIRC3/ZC3H12A	6	M1
GO:0055072	iron ion homeostasis	6/399	74/17913	0.00609587	0.0352815	0.0249984	SLC11A1/FTH1/HIF1A/SLC25A37/ATP6V0D1/FBXL5	6	M1
GO:0006919	activation of cysteine-type endopeptidase activity involved in apoptotic process	6/399	75/17913	0.00650474	0.0370335	0.0262398	NLRP3/CTSH/S100A9/S100A8/TNFRSF10B/F3	6	M1
GO:0051145	smooth muscle cell differentiation	6/399	75/17913	0.00650474	0.0370335	0.0262398	SOD2/EREG/VEGFA/CTNNB1/TGFB1/ADM	6	M1
GO:0045685	regulation of glial cell differentiation	6/399	77/17913	0.00738165	0.0405483	0.0287302	C5AR1/TNFRSF1B/CTNNB1/TLR2/TGFB1/IL6	6	M1
GO:1905954	positive regulation of lipid localization	6/399	78/17913	0.00785072	0.0424531	0.0300798	IL1B/EHD1/NFKBIA/NFKB1/ANXA2/ZC3H12A	6	M1
GO:0030004	cellular monovalent inorganic cation homeostasis	6/399	80/17913	0.00885261	0.0458623	0.0324954	SLC11A1/LRRK2/TCIRG1/ATP6V0D1/ATP6V1B2/ATP1B3	6	M1
GO:0007045	cell-substrate adherens junction assembly	6/399	81/17913	0.00938643	0.0477376	0.0338242	VEGFA/S100A10/LIMS1/THBS1/MAP4K4/IQGAP1	6	M1
GO:0046849	bone remodeling	6/399	81/17913	0.00938643	0.0477376	0.0338242	CTNNB1/TGFB1/ADAM8/TNFAIP3/TCIRG1/IL6	6	M1
GO:0046889	positive regulation of lipid biosynthetic process	6/399	81/17913	0.00938643	0.0477376	0.0338242	PTGS2/IL1B/CAPN2/ACSL3/FPR2/ADM	6	M1
GO:0048041	focal adhesion assembly	6/399	81/17913	0.00938643	0.0477376	0.0338242	VEGFA/S100A10/LIMS1/THBS1/MAP4K4/IQGAP1	6	M1
GO:0006970	response to osmotic stress	6/399	82/17913	0.00994283	0.0498825	0.0353439	PTGS2/AQP9/OXSR1/TSPO/PLK3/NFAT5	6	M1
GO:0008625	extrinsic apoptotic signaling pathway via death domain receptors	6/399	83/17913	0.0105223	0.0520843	0.0369039	THBS1/BID/SKIL/TNFAIP3/ITPRIP/TNFRSF10B	6	M1
GO:0010507	negative regulation of autophagy	6/399	83/17913	0.0105223	0.0520843	0.0369039	NAMPT/MCL1/LRRK2/TSPO/STAT3/QSOX1	6	M1
GO:0042058	regulation of epidermal growth factor receptor signaling pathway	6/399	84/17913	0.0111253	0.054046	0.0382939	PLAUR/EREG/HBEGF/AREG/NCF1/ADAM17	6	M1
GO:0051781	positive regulation of cell division	6/399	84/17913	0.0111253	0.054046	0.0382939	IL1B/EREG/VEGFA/TGFB1/OSM/IL1A	6	M1
GO:0031532	actin cytoskeleton reorganization	6/399	85/17913	0.0117524	0.0564062	0.0399662	FLNA/TGFB1/EZR/PHACTR1/PLEK/MYH9	6	M1
GO:0045185	maintenance of protein location	6/399	85/17913	0.0117524	0.0564062	0.0399662	FLNA/NFKBIA/TSPO/EZR/HK2/INSIG1	6	M1
GO:0034446	substrate adhesion-dependent cell spreading	6/399	86/17913	0.012404	0.0584064	0.0413834	FLNA/S100A10/LIMS1/FERMT3/MYADM/NEDD9	6	M1
GO:0031058	positive regulation of histone modification	6/399	88/17913	0.0137825	0.0638157	0.0452162	IL1B/VEGFA/CTNNB1/TGFB1/LRRK2/JARID2	6	M1
GO:0009119	ribonucleoside metabolic process	6/399	89/17913	0.0145103	0.0662881	0.046968	UPP1/LRRK2/PNP/APOBEC3A/ADA2/CDA	6	M1
GO:0006900	vesicle budding from membrane	6/399	91/17913	0.0160454	0.0715363	0.0506866	SERPINA1/S100A10/AREG/F5/ANXA2/INSIG1	6	M1
GO:0010717	regulation of epithelial to mesenchymal transition	6/399	91/17913	0.0160454	0.0715363	0.0506866	IL1B/CTNNB1/TGFB1/GLIPR2/SNAI1/IL6	6	M1
GO:0045833	negative regulation of lipid metabolic process	6/399	91/17913	0.0160454	0.0715363	0.0506866	IL1B/NFKB1/LPCAT1/SNAI1/INSIG1/HCAR2	6	M1
GO:1901184	regulation of ERBB signaling pathway	6/399	91/17913	0.0160454	0.0715363	0.0506866	PLAUR/EREG/HBEGF/AREG/NCF1/ADAM17	6	M1
GO:0008630	intrinsic apoptotic signaling pathway in response to DNA damage	6/399	92/17913	0.0168535	0.0746153	0.0528681	CD44/TNFRSF1B/BID/SKIL/CDKN1A/SNAI1	6	M1
GO:0014020	primary neural tube formation	6/399	92/17913	0.0168535	0.0746153	0.0528681	TGFB1/VASP/RARA/HIF1A/ZEB2/ADM	6	M1
GO:1903076	regulation of protein localization to plasma membrane	6/399	93/17913	0.0176892	0.0765612	0.0542469	TGFB1/EZR/ITGB1/NUMB/GRASP/ACSL3	6	M1
GO:0045778	positive regulation of ossification	6/399	94/17913	0.0185529	0.0798331	0.0565652	ATP2B1/CTNNB1/TGFB1/CEBPB/IL6R/IL6	6	M1
GO:0008585	female gonad development	6/399	95/17913	0.019445	0.0811357	0.0574882	EREG/VEGFA/FOXO3/CEBPB/PTX3/INHBA	6	M1
GO:0033273	response to vitamin	6/399	95/17913	0.019445	0.0811357	0.0574882	ATP2B1/PTGS2/KYNU/TGFB1/TSPO/RARA	6	M1
GO:0050810	regulation of steroid biosynthetic process	6/399	95/17913	0.019445	0.0811357	0.0574882	IL1B/TSPO/NFKB1/SNAI1/INSIG1/ADM	6	M1
GO:0072527	pyrimidine-containing compound metabolic process	6/399	95/17913	0.019445	0.0811357	0.0574882	GPAT3/TYMP/UPP1/TET2/APOBEC3A/CDA	6	M1
GO:0002377	immunoglobulin production	6/399	98/17913	0.0222955	0.0892826	0.0632606	PTPRC/TGFB1/FGL2/POU2F2/TCIRG1/IL6	6	M1
GO:0005976	polysaccharide metabolic process	6/399	99/17913	0.023305	0.0920338	0.0652099	TGFB1/AOAH/NFKB1/CSGALNACT2/PRKAG2/PHLDA2	6	M1
GO:0098869	cellular oxidant detoxification	6/399	99/17913	0.023305	0.0920338	0.0652099	PTGS2/SOD2/S100A9/GCH1/ALOX5AP/HP	6	M1
GO:0001841	neural tube formation	6/399	100/17913	0.0243448	0.0936905	0.0663838	TGFB1/VASP/RARA/HIF1A/ZEB2/ADM	6	M1
GO:0046545	development of primary female sexual characteristics	6/399	100/17913	0.0243448	0.0936905	0.0663838	EREG/VEGFA/FOXO3/CEBPB/PTX3/INHBA	6	M1
GO:0018107	peptidyl-threonine phosphorylation	6/399	101/17913	0.0254151	0.0966382	0.0684724	OXSR1/RIPK2/TGFB1/LRRK2/PRKAG2/PRKCB	6	M1
GO:0035335	peptidyl-tyrosine dephosphorylation	6/399	101/17913	0.0254151	0.0966382	0.0684724	PTPRC/PTPRE/DUSP1/DUSP6/DUSP2/PTP4A2	6	M1
GO:1905269	positive regulation of chromatin organization	6/399	101/17913	0.0254151	0.0966382	0.0684724	IL1B/VEGFA/CTNNB1/TGFB1/LRRK2/JARID2	6	M1
GO:0050868	negative regulation of T cell activation	6/399	104/17913	0.0288127	0.104378	0.0739566	LILRB2/TGFB1/RIPOR2/VSIR/CEBPB/ZC3H12A	6	M1
GO:0051341	regulation of oxidoreductase activity	6/399	105/17913	0.0300084	0.108269	0.0767133	IL1B/GCH1/LRRK2/HIF1A/NFKB1/HP	6	M1
GO:0002065	columnar/cuboidal epithelial cell differentiation	6/399	106/17913	0.0312363	0.111433	0.0789549	CDKN1A/RIPOR2/RARA/HIF1A/CEBPB/RXRA	6	M1
GO:0030330	DNA damage response, signal transduction by p53 class mediator	6/399	106/17913	0.0312363	0.111433	0.0789549	CD44/FOXO3/CDKN1A/PLK3/DDX5/SNAI1	6	M1
GO:1904659	glucose transmembrane transport	6/399	107/17913	0.0324964	0.113984	0.0807626	SLC2A3/IL1B/SLC2A6/PRKAG2/PRKCB/HK2	6	M1
GO:1990748	cellular detoxification	6/399	107/17913	0.0324964	0.113984	0.0807626	PTGS2/SOD2/S100A9/GCH1/ALOX5AP/HP	6	M1
GO:0018210	peptidyl-threonine modification	6/399	109/17913	0.0351148	0.119697	0.0848106	OXSR1/RIPK2/TGFB1/LRRK2/PRKAG2/PRKCB	6	M1
GO:0006096	glycolytic process	6/399	110/17913	0.0364734	0.123333	0.0873864	HIF1A/PFKFB3/PRKAG2/STAT3/RANBP2/HK2	6	M1
GO:0006757	ATP generation from ADP	6/399	111/17913	0.0378654	0.12636	0.0895316	HIF1A/PFKFB3/PRKAG2/STAT3/RANBP2/HK2	6	M1
GO:1904019	epithelial cell apoptotic process	6/399	111/17913	0.0378654	0.12636	0.0895316	THBS1/FOXO3/BID/TNFAIP3/CAST/IL6	6	M1
GO:0008645	hexose transmembrane transport	6/399	112/17913	0.0392908	0.130431	0.0924163	SLC2A3/IL1B/SLC2A6/PRKAG2/PRKCB/HK2	6	M1
GO:0098754	detoxification	6/399	113/17913	0.0407499	0.133875	0.0948564	PTGS2/SOD2/S100A9/GCH1/ALOX5AP/HP	6	M1
GO:1904375	regulation of protein localization to cell periphery	6/399	113/17913	0.0407499	0.133875	0.0948564	TGFB1/EZR/ITGB1/NUMB/GRASP/ACSL3	6	M1
GO:0015749	monosaccharide transmembrane transport	6/399	114/17913	0.0422428	0.13724	0.0972408	SLC2A3/IL1B/SLC2A6/PRKAG2/PRKCB/HK2	6	M1
GO:0042866	pyruvate biosynthetic process	6/399	114/17913	0.0422428	0.13724	0.0972408	HIF1A/PFKFB3/PRKAG2/STAT3/RANBP2/HK2	6	M1
GO:0046660	female sex differentiation	6/399	114/17913	0.0422428	0.13724	0.0972408	EREG/VEGFA/FOXO3/CEBPB/PTX3/INHBA	6	M1
GO:0051153	regulation of striated muscle cell differentiation	6/399	115/17913	0.0437698	0.139768	0.0990314	EHD1/TGFB1/CD53/AKAP13/RIPOR2/CAPN2	6	M1
GO:0002698	negative regulation of immune effector process	6/399	116/17913	0.0453309	0.143432	0.101628	CD55/PTPRC/SERPINB9/TGFB1/FGL2/ZC3H12A	6	M1
GO:0034219	carbohydrate transmembrane transport	6/399	116/17913	0.0453309	0.143432	0.101628	SLC2A3/IL1B/SLC2A6/PRKAG2/PRKCB/HK2	6	M1
GO:0014066	regulation of phosphatidylinositol 3-kinase signaling	6/399	117/17913	0.0469263	0.14648	0.103787	FGR/LYN/IER3/NCF1/OSM/FYN	6	M1
GO:0034605	cellular response to heat	6/399	117/17913	0.0469263	0.14648	0.103787	PTGS2/THBS1/CDKN1A/LYN/IL1A/RANBP2	6	M1
GO:1900180	regulation of protein localization to nucleus	6/399	117/17913	0.0469263	0.14648	0.103787	PTGS2/FLNA/TGFB1/RASSF5/FYN/ZC3H12A	6	M1
GO:0046031	ADP metabolic process	6/399	121/17913	0.053653	0.160763	0.113907	HIF1A/PFKFB3/PRKAG2/STAT3/RANBP2/HK2	6	M1
GO:1903038	negative regulation of leukocyte cell-cell adhesion	6/399	121/17913	0.053653	0.160763	0.113907	LILRB2/TGFB1/RIPOR2/VSIR/CEBPB/ZC3H12A	6	M1
GO:0032368	regulation of lipid transport	6/399	122/17913	0.0554215	0.163924	0.116147	IL1B/NFKBIA/THBS1/TSPO/NFKB1/ANXA2	6	M1
GO:0034763	negative regulation of transmembrane transport	6/399	122/17913	0.0554215	0.163924	0.116147	IL1B/PPIF/OXSR1/THBS1/TGFB1/PRKCB	6	M1
GO:0055067	monovalent inorganic cation homeostasis	6/399	122/17913	0.0554215	0.163924	0.116147	SLC11A1/LRRK2/TCIRG1/ATP6V0D1/ATP6V1B2/ATP1B3	6	M1
GO:0019218	regulation of steroid metabolic process	6/399	124/17913	0.059063	0.172227	0.12203	IL1B/TSPO/NFKB1/SNAI1/INSIG1/ADM	6	M1
GO:0035296	regulation of tube diameter	6/399	125/17913	0.0609361	0.174749	0.123817	ATP2B1/PTGS2/SOD2/GCH1/SCPEP1/ADM	6	M1
GO:0097746	regulation of blood vessel diameter	6/399	125/17913	0.0609361	0.174749	0.123817	ATP2B1/PTGS2/SOD2/GCH1/SCPEP1/ADM	6	M1
GO:0042476	odontogenesis	6/399	126/17913	0.0628441	0.177135	0.125508	CSF3R/CTNNB1/TGFB1/TCIRG1/ADM/INHBA	6	M1
GO:0051592	response to calcium ion	6/399	126/17913	0.0628441	0.177135	0.125508	PPIF/DUSP1/THBS1/JUNB/IQGAP1/ALOX5AP	6	M1
GO:0097553	calcium ion transmembrane import into cytosol	6/399	126/17913	0.0628441	0.177135	0.125508	PTPRC/CORO1A/TGFB1/LYN/FYN/DIAPH1	6	M1
GO:0045471	response to ethanol	6/399	127/17913	0.0647871	0.182035	0.128979	CYBB/CD14/S100A8/RARA/FYN/STAT3	6	M1
GO:0007498	mesoderm development	6/399	128/17913	0.066765	0.183418	0.12996	VEGFA/KDM6B/ETS2/ITGB1/SNAI1/INHBA	6	M1
GO:0051291	protein heterooligomerization	6/399	128/17913	0.066765	0.183418	0.12996	S100A10/LIMS1/GCH1/ANXA2/BIRC3/TRPS1	6	M1
GO:1903322	positive regulation of protein modification by small protein conjugation or removal	6/399	128/17913	0.066765	0.183418	0.12996	RIPK2/LRRK2/RASSF5/MALT1/BIRC3/ZC3H12A	6	M1
GO:0006165	nucleoside diphosphate phosphorylation	6/399	129/17913	0.0687779	0.187787	0.133055	HIF1A/PFKFB3/PRKAG2/STAT3/RANBP2/HK2	6	M1
GO:0046939	nucleotide phosphorylation	6/399	131/17913	0.0729082	0.194003	0.13746	HIF1A/PFKFB3/PRKAG2/STAT3/RANBP2/HK2	6	M1
GO:0009135	purine nucleoside diphosphate metabolic process	6/399	133/17913	0.0771776	0.203111	0.143913	HIF1A/PFKFB3/PRKAG2/STAT3/RANBP2/HK2	6	M1
GO:0009179	purine ribonucleoside diphosphate metabolic process	6/399	133/17913	0.0771776	0.203111	0.143913	HIF1A/PFKFB3/PRKAG2/STAT3/RANBP2/HK2	6	M1
GO:0050880	regulation of blood vessel size	6/399	133/17913	0.0771776	0.203111	0.143913	ATP2B1/PTGS2/SOD2/GCH1/SCPEP1/ADM	6	M1
GO:0035150	regulation of tube size	6/399	134/17913	0.0793644	0.204863	0.145154	ATP2B1/PTGS2/SOD2/GCH1/SCPEP1/ADM	6	M1
GO:0009185	ribonucleoside diphosphate metabolic process	6/399	135/17913	0.0815856	0.209866	0.148699	HIF1A/PFKFB3/PRKAG2/STAT3/RANBP2/HK2	6	M1
GO:0060041	retina development in camera-type eye	6/399	136/17913	0.0838413	0.213353	0.15117	ATP2B1/CYP1B1/HIF1A/TCIRG1/LPCAT1/JMJD6	6	M1
GO:0014065	phosphatidylinositol 3-kinase signaling	6/399	138/17913	0.0884556	0.219534	0.155549	FGR/LYN/IER3/NCF1/OSM/FYN	6	M1
GO:0030879	mammary gland development	6/399	138/17913	0.0884556	0.219534	0.155549	VEGFA/TGFB1/HIF1A/AREG/CEBPB/HK2	6	M1
GO:0031056	regulation of histone modification	6/399	138/17913	0.0884556	0.219534	0.155549	IL1B/VEGFA/CTNNB1/TGFB1/LRRK2/JARID2	6	M1
GO:0044344	cellular response to fibroblast growth factor stimulus	6/399	138/17913	0.0884556	0.219534	0.155549	CD44/SULF2/CXCL8/CTNNB1/THBS1/IQGAP1	6	M1
GO:0071322	cellular response to carbohydrate stimulus	6/399	139/17913	0.0908139	0.224772	0.159261	CLEC7A/PIM3/FOXO3/HIF1A/MAP4K4/PRKCB	6	M1
GO:0016482	cytosolic transport	6/399	140/17913	0.0932061	0.227888	0.161469	CORO1A/MSN/LRRK2/SPAG9/EZR/CES1	6	M1
GO:0034250	positive regulation of cellular amide metabolic process	6/399	140/17913	0.0932061	0.227888	0.161469	THBS1/PPP1R15A/VIM/PLK3/RXRA/IL6	6	M1
GO:0072073	kidney epithelium development	6/399	140/17913	0.0932061	0.227888	0.161469	VEGFA/CTNNB1/TGFB1/BASP1/RARA/IQGAP1	6	M1
GO:0038094	Fc-gamma receptor signaling pathway	6/399	141/17913	0.0956321	0.23216	0.164495	PTPRC/FGR/CLEC4E/MYO1G/LYN/FYN	6	M1
GO:0010212	response to ionizing radiation	6/399	144/17913	0.103111	0.246015	0.174312	NAMPT/PTPRC/NABP1/TGFB1/CDKN1A/THBD	6	M1
GO:0043271	negative regulation of ion transport	6/399	144/17913	0.103111	0.246015	0.174312	PTGS2/LILRB2/PPIF/OXSR1/THBS1/TGFB1	6	M1
GO:0046165	alcohol biosynthetic process	6/399	145/17913	0.10567	0.248017	0.175731	IL1B/GCH1/NFKB1/PLEK/INSIG1/CES1	6	M1
GO:0060402	calcium ion transport into cytosol	6/399	145/17913	0.10567	0.248017	0.175731	PTPRC/CORO1A/TGFB1/LYN/FYN/DIAPH1	6	M1
GO:0071774	response to fibroblast growth factor	6/399	145/17913	0.10567	0.248017	0.175731	CD44/SULF2/CXCL8/CTNNB1/THBS1/IQGAP1	6	M1
GO:1990138	neuron projection extension	6/399	148/17913	0.113543	0.26096	0.184901	VEGFA/C9orf72/CTNNB1/NDEL1/ITGB1/IQGAP1	6	M1
GO:0072376	protein activation cascade	6/399	151/17913	0.121704	0.275629	0.195295	FCN1/C5AR1/CD55/CFP/IL1B/F3	6	M1
GO:0001764	neuron migration	6/399	152/17913	0.124487	0.281315	0.199324	VEGFA/FLNA/CTNNB1/NDEL1/FYN/STAT3	6	M1
GO:0009132	nucleoside diphosphate metabolic process	6/399	153/17913	0.127302	0.286949	0.203316	HIF1A/PFKFB3/PRKAG2/STAT3/RANBP2/HK2	6	M1
GO:0016125	sterol metabolic process	6/399	155/17913	0.133022	0.296979	0.210422	CYP1B1/PRKAG2/RXRA/APOBR/INSIG1/CES1	6	M1
GO:0071695	anatomical structure maturation	6/399	155/17913	0.133022	0.296979	0.210422	EREG/CTNNB1/LRRK2/FOXO3/CDKN1A/HIF1A	6	M1
GO:0060401	cytosolic calcium ion transport	6/399	157/17913	0.138863	0.306722	0.217326	PTPRC/CORO1A/TGFB1/LYN/FYN/DIAPH1	6	M1
GO:0043487	regulation of RNA stability	6/399	163/17913	0.157082	0.338126	0.239577	SLC11A1/TNFRSF1B/MYD88/VIM/ZC3H12A/NAF1	6	M1
GO:0006937	regulation of muscle contraction	6/399	164/17913	0.160216	0.341892	0.242245	ATP2B1/PTGS2/FLNA/PDE4B/ZC3H12A/PROK2	6	M1
GO:0071466	cellular response to xenobiotic stimulus	6/399	164/17913	0.160216	0.341892	0.242245	S100A12/ACSL1/CYP1B1/TGFB1/APOBEC3A/CES1	6	M1
GO:0060538	skeletal muscle organ development	6/399	165/17913	0.163378	0.347471	0.246198	GPCPD1/CTNNB1/TGFB1/BASP1/RIPOR2/DDX5	6	M1
GO:1902275	regulation of chromatin organization	6/399	165/17913	0.163378	0.347471	0.246198	IL1B/VEGFA/CTNNB1/TGFB1/LRRK2/JARID2	6	M1
GO:0051262	protein tetramerization	6/399	166/17913	0.166566	0.352442	0.24972	SOD2/S100A10/VASP/ANXA2/RXRA/CDA	6	M1
GO:0038095	Fc-epsilon receptor signaling pathway	6/399	169/17913	0.176285	0.365642	0.259073	FCER1G/LCP2/LYN/NFKB1/MALT1/FCER1A	6	M1
GO:0046328	regulation of JNK cascade	6/399	169/17913	0.176285	0.365642	0.259073	IL1B/RIPK2/MAP3K2/NCF1/ZEB2/MAP4K4	6	M1
GO:0001936	regulation of endothelial cell proliferation	6/399	170/17913	0.179575	0.371434	0.263177	VEGFA/THBS1/HIF1A/STAT3/ADAM17/F3	6	M1
GO:0008154	actin polymerization or depolymerization	6/399	170/17913	0.179575	0.371434	0.263177	CORO1A/VASP/CAPG/PLEK/MYADM/DIAPH1	6	M1
GO:0030177	positive regulation of Wnt signaling pathway	6/399	170/17913	0.179575	0.371434	0.263177	SULF2/TLR2/LRRK2/ATP6AP2/NFKB1/ZEB2	6	M1
GO:0006888	ER to Golgi vesicle-mediated transport	6/399	172/17913	0.186229	0.381998	0.270662	SERPINA1/CD55/LRRK2/AREG/F5/INSIG1	6	M1
GO:0042594	response to starvation	6/399	174/17913	0.192979	0.391328	0.277273	UPP1/LRRK2/FOXO3/CDKN1A/ZC3H12A/ADM	6	M1
GO:0022900	electron transport chain	6/399	175/17913	0.196388	0.391584	0.277454	SH3BGRL3/NCF2/CYBB/BID/C15orf48/NCF1	6	M1
GO:0035265	organ growth	6/399	179/17913	0.210246	0.403392	0.285821	BASP1/AKAP13/RARA/JARID2/RXRA/SASH3	6	M1
GO:1901796	regulation of signal transduction by p53 class mediator	6/399	179/17913	0.210246	0.403392	0.285821	CD44/PLK3/DDX5/PRKAG2/TAF13/SNAI1	6	M1
GO:0001935	endothelial cell proliferation	6/399	185/17913	0.231647	0.417411	0.295753	VEGFA/THBS1/HIF1A/STAT3/ADAM17/F3	6	M1
GO:1902115	regulation of organelle assembly	6/399	185/17913	0.231647	0.417411	0.295753	C9orf72/MSN/LRRK2/AKAP13/EZR/LCP1	6	M1
GO:0009749	response to glucose	6/399	190/17913	0.249982	0.428036	0.303282	THBS1/TGFB1/PIM3/FOXO3/HIF1A/MAP4K4	6	M1
GO:0044272	sulfur compound biosynthetic process	6/399	190/17913	0.249982	0.428036	0.303282	VCAN/ACSL1/B4GALT1/DSE/CSGALNACT2/ACSL3	6	M1
GO:0060541	respiratory system development	6/399	193/17913	0.261175	0.435945	0.308886	VEGFA/CTSH/CTNNB1/BASP1/RARA/JMJD6	6	M1
GO:0090276	regulation of peptide hormone secretion	6/399	199/17913	0.283936	0.449552	0.318527	IL1B/PIM3/HIF1A/TCIRG1/MAP4K4/FFAR2	6	M1
GO:0030073	insulin secretion	6/399	200/17913	0.287772	0.450707	0.319345	IL1B/PIM3/IL1RN/HIF1A/TCIRG1/MAP4K4	6	M1
GO:0048705	skeletal system morphogenesis	6/399	204/17913	0.303225	0.460483	0.326272	FGR/CTNNB1/TGFB1/CSRNP1/RARA/INSIG1	6	M1
GO:0009755	hormone-mediated signaling pathway	6/399	216/17913	0.35035	0.495484	0.351072	ACSL1/CTNNB1/AKAP13/RARA/DDX5/RXRA	6	M1
GO:0016358	dendrite development	6/399	216/17913	0.35035	0.495484	0.351072	LST1/LRRK2/ITGB1/FYN/DOCK10/IQGAP1	6	M1
GO:0051054	positive regulation of DNA metabolic process	6/399	222/17913	0.374167	0.515553	0.365291	PTPRC/EREG/CTNNB1/TGFB1/NAF1/IL6	6	M1
GO:0042593	glucose homeostasis	6/399	227/17913	0.394053	0.529014	0.374829	PIM3/FOXO3/HIF1A/STAT3/MAP4K4/FFAR2	6	M1
GO:0033500	carbohydrate homeostasis	6/399	228/17913	0.398029	0.532743	0.377472	PIM3/FOXO3/HIF1A/STAT3/MAP4K4/FFAR2	6	M1
GO:0032412	regulation of ion transmembrane transporter activity	6/399	234/17913	0.421849	0.548762	0.388822	CTSS/PPIF/OXSR1/PDE4B/AHNAK/ATP1B3	6	M1
GO:0140014	mitotic nuclear division	6/399	237/17913	0.433717	0.557474	0.394994	IL1B/EREG/FLNA/DUSP1/TGFB1/IL1A	6	M1
GO:0007281	germ cell development	6/399	238/17913	0.437665	0.561611	0.397925	EREG/CTNNB1/FOXO3/H3F3A/RARA/PTX3	6	M1
GO:0019318	hexose metabolic process	6/399	239/17913	0.441607	0.561964	0.398176	B4GALT1/PFKFB3/CREM/RANBP2/PHLDA2/HK2	6	M1
GO:0042180	cellular ketone metabolic process	6/399	241/17913	0.449475	0.568559	0.402849	PTGS2/IL1B/KYNU/PRKAG2/INSIG1/ADM	6	M1
GO:0022898	regulation of transmembrane transporter activity	6/399	242/17913	0.453401	0.572148	0.405392	CTSS/PPIF/OXSR1/PDE4B/AHNAK/ATP1B3	6	M1
GO:0032409	regulation of transporter activity	6/399	257/17913	0.511344	0.612976	0.43432	CTSS/PPIF/OXSR1/PDE4B/AHNAK/ATP1B3	6	M1
GO:0060828	regulation of canonical Wnt signaling pathway	6/399	264/17913	0.537608	0.628529	0.44534	SULF2/CTNNB1/LRRK2/FOXO3/NFKB1/TMEM170B	6	M1
GO:0000209	protein polyubiquitination	6/399	288/17913	0.62254	0.695799	0.493004	CTNNB1/TNFAIP3/UBE2R2/RNF19B/FBXL5/RNF213	6	M1
GO:0009416	response to light stimulus	6/399	307/17913	0.683038	0.742835	0.52633	PTGS2/CARD16/DUSP1/CDKN1A/HIF1A/ITGB1	6	M1
GO:0045930	negative regulation of mitotic cell cycle	6/399	308/17913	0.686041	0.745405	0.528152	DUSP1/CTNNB1/NABP1/TGFB1/CDKN1A/PLK3	6	M1
GO:0060070	canonical Wnt signaling pathway	6/399	311/17913	0.694938	0.752314	0.533047	SULF2/CTNNB1/LRRK2/FOXO3/NFKB1/TMEM170B	6	M1
GO:0043161	proteasome-mediated ubiquitin-dependent protein catabolic process	6/399	328/17913	0.742153	0.790148	0.559854	CTNNB1/LRRK2/PLK3/RYBP/FBXL5/TRIB1	6	M1
GO:0006402	mRNA catabolic process	6/399	338/17913	0.767371	0.811941	0.575295	SLC11A1/MYD88/VIM/DDX5/ZC3H12A/AGO2	6	M1
GO:0000280	nuclear division	6/399	357/17913	0.810169	0.847541	0.600519	IL1B/EREG/FLNA/DUSP1/TGFB1/IL1A	6	M1
GO:0010498	proteasomal protein catabolic process	6/399	382/17913	0.856818	0.885711	0.627564	CTNNB1/LRRK2/PLK3/RYBP/FBXL5/TRIB1	6	M1
GO:0043588	skin development	6/399	412/17913	0.899944	0.920868	0.652475	EREG/FOSL2/CTNNB1/SNAI1/CSTA/INHBA	6	M1
GO:1901990	regulation of mitotic cell cycle phase transition	6/399	428/17913	0.918027	0.933783	0.661625	DUSP1/TGFB1/BID/CDKN1A/PLK3/ADAM17	6	M1
GO:0000226	microtubule cytoskeleton organization	6/399	460/17913	0.945837	0.954642	0.676405	FLNA/CTNNB1/EZR/CCDC69/PLK3/MYH9	6	M1
GO:1901987	regulation of cell cycle phase transition	6/399	464/17913	0.948642	0.956605	0.677796	DUSP1/TGFB1/BID/CDKN1A/PLK3/ADAM17	6	M1
GO:0070486	leukocyte aggregation	5/399	12/17913	3.72e-06	9.35e-05	6.62e-05	CD44/IL1B/S100A9/MSN/S100A8	5	M1
GO:0002523	leukocyte migration involved in inflammatory response	5/399	14/17913	9.07e-06	0.000197633	0.000140032	ITGB2/S100A9/ADAM8/S100A8/FFAR2	5	M1
GO:0050711	negative regulation of interleukin-1 secretion	5/399	17/17913	2.65e-05	0.000506095	0.00035859	NLRP3/CARD16/TNFAIP3/IL1R2/ZC3H12A	5	M1
GO:0002726	positive regulation of T cell cytokine production	5/399	19/17913	4.81e-05	0.000829408	0.000587671	NLRP3/IL1B/MALT1/SASH3/IL6	5	M1
GO:0030949	positive regulation of vascular endothelial growth factor receptor signaling pathway	5/399	19/17913	4.81e-05	0.000829408	0.000587671	IL1B/VEGFA/HIF1A/PRKCB/ITGA5	5	M1
GO:0030728	ovulation	5/399	21/17913	8.11e-05	0.00130069	0.000921596	PTGS2/EREG/FOXO3/TNFAIP6/INHBA	5	M1
GO:0042454	ribonucleoside catabolic process	5/399	21/17913	8.11e-05	0.00130069	0.000921596	UPP1/PNP/APOBEC3A/ADA2/CDA	5	M1
GO:0150078	positive regulation of neuroinflammatory response	5/399	24/17913	0.000160239	0.00230505	0.00163323	IL1B/ITGB2/LRRK2/ITGAM/IL6	5	M1
GO:0051894	positive regulation of focal adhesion assembly	5/399	25/17913	0.000196661	0.00272324	0.00192953	VEGFA/S100A10/LIMS1/MAP4K4/IQGAP1	5	M1
GO:0043304	regulation of mast cell degranulation	5/399	27/17913	0.000288078	0.00370324	0.0026239	FGR/FCER1G/ADGRE2/LYN/STXBP2	5	M1
GO:0002888	positive regulation of myeloid leukocyte mediated immunity	5/399	29/17913	0.000408545	0.00494818	0.003506	ITGB2/FGR/FCER1G/ITGAM/DDX21	5	M1
GO:0033006	regulation of mast cell activation involved in immune response	5/399	29/17913	0.000408545	0.00494818	0.003506	FGR/FCER1G/ADGRE2/LYN/STXBP2	5	M1
GO:0006691	leukotriene metabolic process	5/399	31/17913	0.000563559	0.00643964	0.00456276	ALOX5/TLR2/LTA4H/ALOX5AP/CYP4F3	5	M1
GO:0044319	wound healing, spreading of cells	5/399	31/17913	0.000563559	0.00643964	0.00456276	CD44/FLNA/HBEGF/ADAM17/ITGA5	5	M1
GO:0090505	epiboly involved in wound healing	5/399	31/17913	0.000563559	0.00643964	0.00456276	CD44/FLNA/HBEGF/ADAM17/ITGA5	5	M1
GO:1902692	regulation of neuroblast proliferation	5/399	31/17913	0.000563559	0.00643964	0.00456276	VEGFA/CTNNB1/TGFB1/LRRK2/HIF1A	5	M1
GO:0033028	myeloid cell apoptotic process	5/399	32/17913	0.00065584	0.00723269	0.00512467	FCER1G/ADAM17/HCAR2/CLEC5A/IL6	5	M1
GO:0090504	epiboly	5/399	32/17913	0.00065584	0.00723269	0.00512467	CD44/FLNA/HBEGF/ADAM17/ITGA5	5	M1
GO:0030947	regulation of vascular endothelial growth factor receptor signaling pathway	5/399	33/17913	0.000758979	0.00797556	0.00565103	IL1B/VEGFA/HIF1A/PRKCB/ITGA5	5	M1
GO:1901890	positive regulation of cell junction assembly	5/399	33/17913	0.000758979	0.00797556	0.00565103	VEGFA/S100A10/LIMS1/MAP4K4/IQGAP1	5	M1
GO:0032660	regulation of interleukin-17 production	5/399	34/17913	0.000873758	0.00894897	0.00634073	MYD88/TGFB1/VSIR/OSM/IL6	5	M1
GO:1902622	regulation of neutrophil migration	5/399	34/17913	0.000873758	0.00894897	0.00634073	C5AR1/CXCL8/ADAM8/RIPOR2/BST1	5	M1
GO:0071402	cellular response to lipoprotein particle stimulus	5/399	35/17913	0.00100097	0.00989146	0.00700852	ITGB2/FCER1G/MYD88/ITGB1/ADAM17	5	M1
GO:0072529	pyrimidine-containing compound catabolic process	5/399	35/17913	0.00100097	0.00989146	0.00700852	TYMP/UPP1/TET2/APOBEC3A/CDA	5	M1
GO:1900026	positive regulation of substrate adhesion-dependent cell spreading	5/399	36/17913	0.00114144	0.0108878	0.00771446	FLNA/S100A10/LIMS1/MYADM/NEDD9	5	M1
GO:0007520	myoblast fusion	5/399	38/17913	0.00146544	0.0129772	0.00919492	EHD1/CD53/RIPOR2/MYH9/CAPN2	5	M1
GO:0032620	interleukin-17 production	5/399	38/17913	0.00146544	0.0129772	0.00919492	MYD88/TGFB1/VSIR/OSM/IL6	5	M1
GO:0033003	regulation of mast cell activation	5/399	39/17913	0.00165065	0.0138699	0.00982739	FGR/FCER1G/ADGRE2/LYN/STXBP2	5	M1
GO:0032692	negative regulation of interleukin-1 production	5/399	40/17913	0.00185249	0.0150536	0.0106661	NLRP3/CARD16/TNFAIP3/IL1R2/ZC3H12A	5	M1
GO:0050832	defense response to fungus	5/399	40/17913	0.00185249	0.0150536	0.0106661	S100A12/COTL1/S100A9/TGFB1/S100A8	5	M1
GO:0061028	establishment of endothelial barrier	5/399	40/17913	0.00185249	0.0150536	0.0106661	IL1B/CTNNB1/MSN/EZR/MYADM	5	M1
GO:0031641	regulation of myelination	5/399	41/17913	0.0020718	0.0164032	0.0116223	ITGAX/TNFRSF1B/TYMP/CTNNB1/RARA	5	M1
GO:0090382	phagosome maturation	5/399	42/17913	0.00230947	0.017846	0.0126447	CORO1A/TCIRG1/RAB31/ATP6V0D1/ATP6V1B2	5	M1
GO:0010883	regulation of lipid storage	5/399	43/17913	0.00256637	0.0190125	0.0134712	EHD1/NFKBIA/NFKB1/ZC3H12A/IL6	5	M1
GO:0043303	mast cell degranulation	5/399	43/17913	0.00256637	0.0190125	0.0134712	FGR/FCER1G/ADGRE2/LYN/STXBP2	5	M1
GO:2001239	regulation of extrinsic apoptotic signaling pathway in absence of ligand	5/399	43/17913	0.00256637	0.0190125	0.0134712	IL1B/MCL1/IL1A/FYN/INHBA	5	M1
GO:0030225	macrophage differentiation	5/399	44/17913	0.00284337	0.0203196	0.0143973	VEGFA/TLR2/TGFB1/TRIB1/INHBA	5	M1
GO:0071622	regulation of granulocyte chemotaxis	5/399	44/17913	0.00284337	0.0203196	0.0143973	C5AR1/CXCL8/THBS1/RIPOR2/BST1	5	M1
GO:0002279	mast cell activation involved in immune response	5/399	45/17913	0.00314135	0.0221639	0.0157041	FGR/FCER1G/ADGRE2/LYN/STXBP2	5	M1
GO:0035987	endodermal cell differentiation	5/399	45/17913	0.00314135	0.0221639	0.0157041	ITGB2/CTNNB1/LAMB3/ITGA5/INHBA	5	M1
GO:0071354	cellular response to interleukin-6	5/399	46/17913	0.00346118	0.0233106	0.0165165	SOCS3/NFKB1/STAT3/IL6R/IL6	5	M1
GO:0035722	interleukin-12-mediated signaling pathway	5/399	47/17913	0.00380376	0.0250856	0.0177742	SOD2/MSN/ANXA2/SERPINB2/LCP1	5	M1
GO:0032653	regulation of interleukin-10 production	5/399	48/17913	0.00416995	0.0266313	0.0188694	LILRA5/FCER1G/TLR2/VSIR/SASH3	5	M1
GO:1903307	positive regulation of regulated secretory pathway	5/399	48/17913	0.00416995	0.0266313	0.0188694	ITGB2/FGR/FCER1G/ITGAM/RAB27A	5	M1
GO:0010712	regulation of collagen metabolic process	5/399	49/17913	0.00456061	0.0285118	0.0202019	TGFB1/VSIR/ITGB1/VIM/IL6	5	M1
GO:0071349	cellular response to interleukin-12	5/399	49/17913	0.00456061	0.0285118	0.0202019	SOD2/MSN/ANXA2/SERPINB2/LCP1	5	M1
GO:0001706	endoderm formation	5/399	50/17913	0.00497662	0.0301258	0.0213454	ITGB2/CTNNB1/LAMB3/ITGA5/INHBA	5	M1
GO:0014009	glial cell proliferation	5/399	50/17913	0.00497662	0.0301258	0.0213454	IL1B/TSPO/LYN/AREG/IL6	5	M1
GO:0070741	response to interleukin-6	5/399	50/17913	0.00497662	0.0301258	0.0213454	SOCS3/NFKB1/STAT3/IL6R/IL6	5	M1
GO:2000179	positive regulation of neural precursor cell proliferation	5/399	50/17913	0.00497662	0.0301258	0.0213454	VEGFA/FLNA/CTNNB1/HIF1A/LYN	5	M1
GO:0001954	positive regulation of cell-matrix adhesion	5/399	51/17913	0.00541883	0.0322015	0.0228161	VEGFA/S100A10/LIMS1/MAP4K4/IQGAP1	5	M1
GO:0032613	interleukin-10 production	5/399	51/17913	0.00541883	0.0322015	0.0228161	LILRA5/FCER1G/TLR2/VSIR/SASH3	5	M1
GO:0048146	positive regulation of fibroblast proliferation	5/399	51/17913	0.00541883	0.0322015	0.0228161	S100A6/EREG/FOSL2/TGFB1/CDKN1A	5	M1
GO:1900024	regulation of substrate adhesion-dependent cell spreading	5/399	51/17913	0.00541883	0.0322015	0.0228161	FLNA/S100A10/LIMS1/MYADM/NEDD9	5	M1
GO:0000768	syncytium formation by plasma membrane fusion	5/399	53/17913	0.00638524	0.0364812	0.0258485	EHD1/CD53/RIPOR2/MYH9/CAPN2	5	M1
GO:0032655	regulation of interleukin-12 production	5/399	53/17913	0.00638524	0.0364812	0.0258485	LILRA5/RIPK2/THBS1/TLR2/NFKB1	5	M1
GO:0043551	regulation of phosphatidylinositol 3-kinase activity	5/399	53/17913	0.00638524	0.0364812	0.0258485	FGR/SOCS3/TGFB1/LYN/FPR2	5	M1
GO:0050853	B cell receptor signaling pathway	5/399	53/17913	0.00638524	0.0364812	0.0258485	PTPRC/MNDA/LYN/NFAM1/PRKCB	5	M1
GO:0140253	cell-cell fusion	5/399	53/17913	0.00638524	0.0364812	0.0258485	EHD1/CD53/RIPOR2/MYH9/CAPN2	5	M1
GO:0002011	morphogenesis of an epithelial sheet	5/399	54/17913	0.00691111	0.0388763	0.0275455	CD44/FLNA/HBEGF/ADAM17/ITGA5	5	M1
GO:0006636	unsaturated fatty acid biosynthetic process	5/399	54/17913	0.00691111	0.0388763	0.0275455	PTGS2/IL1B/PNPLA8/ALOX5/ALOX5AP	5	M1
GO:0060760	positive regulation of response to cytokine stimulus	5/399	54/17913	0.00691111	0.0388763	0.0275455	CASP1/RIPK2/TLR2/HIF1A/ADAM17	5	M1
GO:0001885	endothelial cell development	5/399	55/17913	0.00746652	0.0406724	0.0288182	IL1B/CTNNB1/MSN/EZR/MYADM	5	M1
GO:0006949	syncytium formation	5/399	55/17913	0.00746652	0.0406724	0.0288182	EHD1/CD53/RIPOR2/MYH9/CAPN2	5	M1
GO:0009435	NAD biosynthetic process	5/399	55/17913	0.00746652	0.0406724	0.0288182	NAMPT/PTGS2/KYNU/PNP/HK2	5	M1
GO:0032615	interleukin-12 production	5/399	55/17913	0.00746652	0.0406724	0.0288182	LILRA5/RIPK2/THBS1/TLR2/NFKB1	5	M1
GO:0035306	positive regulation of dephosphorylation	5/399	55/17913	0.00746652	0.0406724	0.0288182	PTPRC/LILRB2/TGFB1/PPP1R15A/PLEK	5	M1
GO:0006826	iron ion transport	5/399	56/17913	0.00805228	0.0428868	0.0303872	SLC11A1/FTH1/TCIRG1/ATP6V0D1/ATP6V1B2	5	M1
GO:1903202	negative regulation of oxidative stress-induced cell death	5/399	56/17913	0.00805228	0.0428868	0.0303872	SOD2/CTNNB1/LRRK2/HIF1A/FYN	5	M1
GO:0006879	cellular iron ion homeostasis	5/399	57/17913	0.00866918	0.0451355	0.0319804	SLC11A1/FTH1/HIF1A/ATP6V0D1/FBXL5	5	M1
GO:0045453	bone resorption	5/399	57/17913	0.00866918	0.0451355	0.0319804	CTNNB1/ADAM8/TNFAIP3/TCIRG1/IL6	5	M1
GO:0060688	regulation of morphogenesis of a branching structure	5/399	57/17913	0.00866918	0.0451355	0.0319804	VEGFA/CTNNB1/TGFB1/LRRK2/RXRA	5	M1
GO:0090183	regulation of kidney development	5/399	57/17913	0.00866918	0.0451355	0.0319804	VEGFA/CTNNB1/TGFB1/BASP1/IL6R	5	M1
GO:1900408	negative regulation of cellular response to oxidative stress	5/399	57/17913	0.00866918	0.0451355	0.0319804	SOD2/CTNNB1/LRRK2/HIF1A/FYN	5	M1
GO:1902041	regulation of extrinsic apoptotic signaling pathway via death domain receptors	5/399	57/17913	0.00866918	0.0451355	0.0319804	THBS1/SKIL/TNFAIP3/ITPRIP/TNFRSF10B	5	M1
GO:0070527	platelet aggregation	5/399	58/17913	0.009318	0.0476622	0.0337707	FLNA/LYN/PLEK/FERMT3/MYH9	5	M1
GO:0070059	intrinsic apoptotic signaling pathway in response to endoplasmic reticulum stress	5/399	59/17913	0.00999949	0.0498852	0.0353458	LRRK2/PPP1R15A/SELENOK/CEBPB/TNFRSF10B	5	M1
GO:0090303	positive regulation of wound healing	5/399	59/17913	0.00999949	0.0498852	0.0353458	HBEGF/THBS1/PLEK/THBD/F3	5	M1
GO:1902883	negative regulation of response to oxidative stress	5/399	59/17913	0.00999949	0.0498852	0.0353458	SOD2/CTNNB1/LRRK2/HIF1A/FYN	5	M1
GO:0046824	positive regulation of nucleocytoplasmic transport	5/399	60/17913	0.0107144	0.0528366	0.037437	PTGS2/IL1B/FLNA/TGFB1/ZC3H12A	5	M1
GO:0010803	regulation of tumor necrosis factor-mediated signaling pathway	5/399	61/17913	0.0114635	0.0553862	0.0392435	CARD16/CASP1/TNFAIP3/BIRC3/ADAM17	5	M1
GO:0046888	negative regulation of hormone secretion	5/399	61/17913	0.0114635	0.0553862	0.0392435	IL1B/PIM3/OSM/MAP4K4/INHBA	5	M1
GO:0051453	regulation of intracellular pH	5/399	61/17913	0.0114635	0.0553862	0.0392435	SLC11A1/LRRK2/TCIRG1/ATP6V0D1/ATP6V1B2	5	M1
GO:0043550	regulation of lipid kinase activity	5/399	62/17913	0.0122475	0.0581428	0.0411966	FGR/SOCS3/TGFB1/LYN/FPR2	5	M1
GO:2001244	positive regulation of intrinsic apoptotic signaling pathway	5/399	62/17913	0.0122475	0.0581428	0.0411966	MCL1/S100A9/BID/SKIL/S100A8	5	M1
GO:0045600	positive regulation of fat cell differentiation	5/399	63/17913	0.013067	0.0610115	0.0432292	PTGS2/METRNL/SYAP1/CEBPB/ZC3H12A	5	M1
GO:0030641	regulation of cellular pH	5/399	65/17913	0.0148155	0.0674742	0.0478084	SLC11A1/LRRK2/TCIRG1/ATP6V0D1/ATP6V1B2	5	M1
GO:0050918	positive chemotaxis	5/399	67/17913	0.0167141	0.0741458	0.0525355	VEGFA/CXCL8/CORO1A/FPR2/F3	5	M1
GO:0002088	lens development in camera-type eye	5/399	68/17913	0.0177212	0.0766253	0.0542923	CTNNB1/TGFB1/SKIL/VIM/ZEB2	5	M1
GO:0051155	positive regulation of striated muscle cell differentiation	5/399	69/17913	0.0187677	0.0806012	0.0571094	EHD1/TGFB1/CD53/RIPOR2/CAPN2	5	M1
GO:0001960	negative regulation of cytokine-mediated signaling pathway	5/399	71/17913	0.0209807	0.0854804	0.0605665	PTPRC/CARD16/IL1RN/IL1R2/IL6	5	M1
GO:0034121	regulation of toll-like receptor signaling pathway	5/399	71/17913	0.0209807	0.0854804	0.0605665	TLR2/CD14/TNFAIP3/LYN/BIRC3	5	M1
GO:0051651	maintenance of location in cell	5/399	72/17913	0.0221483	0.0887729	0.0628994	FTH1/TSPO/EZR/HK2/INSIG1	5	M1
GO:0061045	negative regulation of wound healing	5/399	73/17913	0.0233573	0.0920338	0.0652099	PLAUR/THBS1/CDKN1A/SERPINB2/THBD	5	M1
GO:0070373	negative regulation of ERK1 and ERK2 cascade	5/399	74/17913	0.0246081	0.0941334	0.0666975	PTPRC/DUSP1/EZR/LYN/DUSP6	5	M1
GO:1900182	positive regulation of protein localization to nucleus	5/399	74/17913	0.0246081	0.0941334	0.0666975	PTGS2/FLNA/TGFB1/FYN/ZC3H12A	5	M1
GO:0002479	antigen processing and presentation of exogenous peptide antigen via MHC class I, TAP-dependent	5/399	75/17913	0.0259012	0.0981507	0.069544	NCF2/HLA-C/CYBB/HLA-B/NCF1	5	M1
GO:0006110	regulation of glycolytic process	5/399	75/17913	0.0259012	0.0981507	0.069544	HIF1A/PFKFB3/PRKAG2/STAT3/RANBP2	5	M1
GO:0006885	regulation of pH	5/399	76/17913	0.027237	0.101995	0.072268	SLC11A1/LRRK2/TCIRG1/ATP6V0D1/ATP6V1B2	5	M1
GO:0030811	regulation of nucleotide catabolic process	5/399	77/17913	0.0286158	0.10375	0.0735112	HIF1A/PFKFB3/PRKAG2/STAT3/RANBP2	5	M1
GO:0034109	homotypic cell-cell adhesion	5/399	77/17913	0.0286158	0.10375	0.0735112	FLNA/LYN/PLEK/FERMT3/MYH9	5	M1
GO:0060761	negative regulation of response to cytokine stimulus	5/399	77/17913	0.0286158	0.10375	0.0735112	PTPRC/CARD16/IL1RN/IL1R2/IL6	5	M1
GO:0001570	vasculogenesis	5/399	78/17913	0.0300381	0.108288	0.0767268	VEGFA/CTNNB1/TGFB1/JUNB/ADM	5	M1
GO:0006029	proteoglycan metabolic process	5/399	79/17913	0.0315041	0.112298	0.079568	VCAN/SULF2/CTNNB1/DSE/CSGALNACT2	5	M1
GO:0050886	endocrine process	5/399	80/17913	0.0330142	0.114468	0.0811056	IL1B/ATP6AP2/HCAR2/INHBA/CES1	5	M1
GO:0110110	positive regulation of animal organ morphogenesis	5/399	80/17913	0.0330142	0.114468	0.0811056	VEGFA/CTNNB1/TGFB1/BASP1/TNFAIP3	5	M1
GO:0014068	positive regulation of phosphatidylinositol 3-kinase signaling	5/399	81/17913	0.0345687	0.118017	0.0836199	FGR/LYN/NCF1/OSM/FYN	5	M1
GO:0045921	positive regulation of exocytosis	5/399	82/17913	0.0361677	0.122816	0.0870201	ITGB2/FGR/FCER1G/ITGAM/RAB27A	5	M1
GO:0046470	phosphatidylcholine metabolic process	5/399	82/17913	0.0361677	0.122816	0.0870201	PLBD1/PNPLA8/LPCAT1/CAPN2/ACSL3	5	M1
GO:0042446	hormone biosynthetic process	5/399	84/17913	0.0395007	0.130543	0.0924954	IL1B/TSPO/HIF1A/NFKB1/ADM	5	M1
GO:0043470	regulation of carbohydrate catabolic process	5/399	84/17913	0.0395007	0.130543	0.0924954	HIF1A/PFKFB3/PRKAG2/STAT3/RANBP2	5	M1
GO:0048477	oogenesis	5/399	84/17913	0.0395007	0.130543	0.0924954	EREG/CTNNB1/FOXO3/H3F3A/PTX3	5	M1
GO:0070542	response to fatty acid	5/399	85/17913	0.041235	0.13497	0.0956321	PTGS2/ACSL1/TLR2/ZC3H12A/FFAR2	5	M1
GO:1903901	negative regulation of viral life cycle	5/399	85/17913	0.041235	0.13497	0.0956321	FCN1/IFITM2/APOBEC3A/ZC3H12A/PTX3	5	M1
GO:0001843	neural tube closure	5/399	86/17913	0.0430146	0.137455	0.0973929	TGFB1/VASP/RARA/ZEB2/ADM	5	M1
GO:1903321	negative regulation of protein modification by small protein conjugation or removal	5/399	86/17913	0.0430146	0.137455	0.0973929	CTNNB1/IVNS1ABP/TNFAIP3/TSPO/FYN	5	M1
GO:0060606	tube closure	5/399	87/17913	0.0448399	0.142367	0.100873	TGFB1/VASP/RARA/ZEB2/ADM	5	M1
GO:1903035	negative regulation of response to wounding	5/399	87/17913	0.0448399	0.142367	0.100873	PLAUR/THBS1/CDKN1A/SERPINB2/THBD	5	M1
GO:0097306	cellular response to alcohol	5/399	88/17913	0.0467108	0.146424	0.103748	ATP2B1/CTNNB1/CYBB/FOXO3/INHBA	5	M1
GO:1904035	regulation of epithelial cell apoptotic process	5/399	88/17913	0.0467108	0.146424	0.103748	THBS1/FOXO3/TNFAIP3/CAST/IL6	5	M1
GO:0032088	negative regulation of NF-kappaB transcription factor activity	5/399	89/17913	0.0486275	0.149469	0.105905	NLRP3/NFKBIA/CYP1B1/TNFAIP3/ZC3H12A	5	M1
GO:0051196	regulation of coenzyme metabolic process	5/399	90/17913	0.0505901	0.154446	0.109431	HIF1A/PFKFB3/PRKAG2/STAT3/RANBP2	5	M1
GO:2001169	regulation of ATP biosynthetic process	5/399	90/17913	0.0505901	0.154446	0.109431	HIF1A/PFKFB3/PRKAG2/STAT3/RANBP2	5	M1
GO:0000041	transition metal ion transport	5/399	91/17913	0.0525985	0.158724	0.112463	SLC11A1/FTH1/TCIRG1/ATP6V0D1/ATP6V1B2	5	M1
GO:0060337	type I interferon signaling pathway	5/399	91/17913	0.0525985	0.158724	0.112463	HLA-C/MYD88/HLA-B/IFITM2/GBP2	5	M1
GO:0071357	cellular response to type I interferon	5/399	91/17913	0.0525985	0.158724	0.112463	HLA-C/MYD88/HLA-B/IFITM2/GBP2	5	M1
GO:0051591	response to cAMP	5/399	93/17913	0.056753	0.167175	0.118451	AQP9/DUSP1/EZR/AREG/THBD	5	M1
GO:0048709	oligodendrocyte differentiation	5/399	94/17913	0.0588991	0.172227	0.12203	TNFRSF1B/CTNNB1/TLR2/TGFB1/LYN	5	M1
GO:1990823	response to leukemia inhibitory factor	5/399	94/17913	0.0588991	0.172227	0.12203	LAPTM5/SOCS3/JARID2/HK2/TWISTNB	5	M1
GO:1990830	cellular response to leukemia inhibitory factor	5/399	94/17913	0.0588991	0.172227	0.12203	LAPTM5/SOCS3/JARID2/HK2/TWISTNB	5	M1
GO:0034340	response to type I interferon	5/399	95/17913	0.0610909	0.174855	0.123892	HLA-C/MYD88/HLA-B/IFITM2/GBP2	5	M1
GO:0045069	regulation of viral genome replication	5/399	95/17913	0.0610909	0.174855	0.123892	CXCL8/IFITM2/DDX5/APOBEC3A/ZC3H12A	5	M1
GO:0060993	kidney morphogenesis	5/399	95/17913	0.0610909	0.174855	0.123892	VEGFA/CTNNB1/TGFB1/LRRK2/BASP1	5	M1
GO:0120162	positive regulation of cold-induced thermogenesis	5/399	97/17913	0.0656119	0.182332	0.12919	G0S2/VEGFA/KDM6B/ACSL1/CEBPB	5	M1
GO:0001657	ureteric bud development	5/399	98/17913	0.0679407	0.185616	0.131517	VEGFA/CTNNB1/TGFB1/BASP1/RARA	5	M1
GO:0010522	regulation of calcium ion transport into cytosol	5/399	98/17913	0.0679407	0.185616	0.131517	CORO1A/TGFB1/LYN/FYN/DIAPH1	5	M1
GO:0030301	cholesterol transport	5/399	98/17913	0.0679407	0.185616	0.131517	NFKBIA/TSPO/NFKB1/ANXA2/CES1	5	M1
GO:0050848	regulation of calcium-mediated signaling	5/399	98/17913	0.0679407	0.185616	0.131517	LRRK2/SELENOK/PLEK/BST1/NFAT5	5	M1
GO:0048525	negative regulation of viral process	5/399	99/17913	0.070315	0.190805	0.135193	FCN1/IFITM2/APOBEC3A/ZC3H12A/PTX3	5	M1
GO:0072163	mesonephric epithelium development	5/399	99/17913	0.070315	0.190805	0.135193	VEGFA/CTNNB1/TGFB1/BASP1/RARA	5	M1
GO:0072164	mesonephric tubule development	5/399	99/17913	0.070315	0.190805	0.135193	VEGFA/CTNNB1/TGFB1/BASP1/RARA	5	M1
GO:0046822	regulation of nucleocytoplasmic transport	5/399	100/17913	0.0727344	0.193828	0.137335	PTGS2/IL1B/FLNA/TGFB1/ZC3H12A	5	M1
GO:0001823	mesonephros development	5/399	103/17913	0.0802625	0.206582	0.146372	VEGFA/CTNNB1/TGFB1/BASP1/RARA	5	M1
GO:0032526	response to retinoic acid	5/399	103/17913	0.0802625	0.206582	0.146372	DUSP1/CTSH/RARA/LYN/RXRA	5	M1
GO:0043200	response to amino acid	5/399	106/17913	0.0881901	0.219534	0.155549	CYBB/LYN/CEBPB/FYN/CAPN2	5	M1
GO:0001938	positive regulation of endothelial cell proliferation	5/399	107/17913	0.0909202	0.224772	0.159261	VEGFA/HIF1A/STAT3/ADAM17/F3	5	M1
GO:0014902	myotube differentiation	5/399	107/17913	0.0909202	0.224772	0.159261	EHD1/CD53/RIPOR2/MYH9/CAPN2	5	M1
GO:0015918	sterol transport	5/399	107/17913	0.0909202	0.224772	0.159261	NFKBIA/TSPO/NFKB1/ANXA2/CES1	5	M1
GO:0030282	bone mineralization	5/399	108/17913	0.0936935	0.228954	0.162224	ATP2B1/PTGS2/FGR/TGFB1/HIF1A	5	M1
GO:0072009	nephron epithelium development	5/399	109/17913	0.0965098	0.233525	0.165463	VEGFA/CTNNB1/TGFB1/BASP1/IQGAP1	5	M1
GO:1900371	regulation of purine nucleotide biosynthetic process	5/399	109/17913	0.0965098	0.233525	0.165463	HIF1A/PFKFB3/PRKAG2/STAT3/RANBP2	5	M1
GO:0030808	regulation of nucleotide biosynthetic process	5/399	110/17913	0.0993687	0.237853	0.168529	HIF1A/PFKFB3/PRKAG2/STAT3/RANBP2	5	M1
GO:0031398	positive regulation of protein ubiquitination	5/399	110/17913	0.0993687	0.237853	0.168529	RIPK2/LRRK2/RASSF5/MALT1/BIRC3	5	M1
GO:0021987	cerebral cortex development	5/399	112/17913	0.105213	0.248017	0.175731	BCL2A1/FLNA/CTNNB1/NDEL1/HIF1A	5	M1
GO:0051209	release of sequestered calcium ion into cytosol	5/399	112/17913	0.105213	0.248017	0.175731	PTPRC/CORO1A/TGFB1/LYN/DIAPH1	5	M1
GO:0051283	negative regulation of sequestering of calcium ion	5/399	112/17913	0.105213	0.248017	0.175731	PTPRC/CORO1A/TGFB1/LYN/DIAPH1	5	M1
GO:1903828	negative regulation of cellular protein localization	5/399	112/17913	0.105213	0.248017	0.175731	TGFB1/LRRK2/RIPOR2/NUMB/INSIG1	5	M1
GO:0051282	regulation of sequestering of calcium ion	5/399	114/17913	0.111223	0.257895	0.182729	PTPRC/CORO1A/TGFB1/LYN/DIAPH1	5	M1
GO:0010822	positive regulation of mitochondrion organization	5/399	115/17913	0.114289	0.262132	0.185732	PLAUR/PPIF/BID/HIF1A/HK2	5	M1
GO:0045727	positive regulation of translation	5/399	117/17913	0.120541	0.273842	0.194029	THBS1/PPP1R15A/VIM/RXRA/IL6	5	M1
GO:0051208	sequestering of calcium ion	5/399	117/17913	0.120541	0.273842	0.194029	PTPRC/CORO1A/TGFB1/LYN/DIAPH1	5	M1
GO:0008637	apoptotic mitochondrial changes	5/399	119/17913	0.12695	0.286588	0.20306	PLAUR/SOD2/PPIF/BID/HK2	5	M1
GO:0019079	viral genome replication	5/399	120/17913	0.130212	0.291046	0.206219	CXCL8/IFITM2/DDX5/APOBEC3A/ZC3H12A	5	M1
GO:0035023	regulation of Rho protein signal transduction	5/399	124/17913	0.143633	0.314197	0.222622	FGD4/SPATA13/AKAP13/RIPOR2/ITGB1	5	M1
GO:0042177	negative regulation of protein catabolic process	5/399	124/17913	0.143633	0.314197	0.222622	TIMP1/FLNA/FYN/RYBP/ANXA2	5	M1
GO:0046330	positive regulation of JNK cascade	5/399	124/17913	0.143633	0.314197	0.222622	IL1B/RIPK2/MAP3K2/NCF1/ZEB2	5	M1
GO:0006956	complement activation	5/399	128/17913	0.157624	0.3388	0.240054	FCN1/C5AR1/CD55/CFP/IL1B	5	M1
GO:0045995	regulation of embryonic development	5/399	128/17913	0.157624	0.3388	0.240054	CTNNB1/IL1RN/MYADM/PHLDA2/SNAI1	5	M1
GO:0001889	liver development	5/399	130/17913	0.164822	0.350207	0.248137	SULF2/TGFB1/TNFAIP3/CEBPB/JARID2	5	M1
GO:0007033	vacuole organization	5/399	131/17913	0.168469	0.35524	0.251703	CORO1A/C9orf72/LRRK2/VMP1/ANXA2	5	M1
GO:0030048	actin filament-based movement	5/399	132/17913	0.172148	0.361283	0.255985	FLNA/PDE4B/VIM/MYH9/TPM4	5	M1
GO:0048565	digestive tract development	5/399	132/17913	0.172148	0.361283	0.255985	CXCL8/CTNNB1/TGFB1/CDKN1A/HIF1A	5	M1
GO:0061008	hepaticobiliary system development	5/399	133/17913	0.175858	0.365642	0.259073	SULF2/TGFB1/TNFAIP3/CEBPB/JARID2	5	M1
GO:0002920	regulation of humoral immune response	5/399	135/17913	0.183368	0.376301	0.266626	C5AR1/CD55/PTPRC/CFP/IL1B	5	M1
GO:0035304	regulation of protein dephosphorylation	5/399	137/17913	0.190993	0.38801	0.274922	PTPRC/LILRB2/TGFB1/PPP1R15A/PHACTR1	5	M1
GO:0002433	immune response-regulating cell surface receptor signaling pathway involved in phagocytosis	5/399	139/17913	0.19873	0.391584	0.277454	PTPRC/FGR/MYO1G/LYN/FYN	5	M1
GO:0038096	Fc-gamma receptor signaling pathway involved in phagocytosis	5/399	139/17913	0.19873	0.391584	0.277454	PTPRC/FGR/MYO1G/LYN/FYN	5	M1
GO:0002431	Fc receptor mediated stimulatory signaling pathway	5/399	142/17913	0.210531	0.403392	0.285821	PTPRC/FGR/MYO1G/LYN/FYN	5	M1
GO:0007612	learning	5/399	142/17913	0.210531	0.403392	0.285821	PTGS2/TLR2/HIF1A/ITGB1/FYN	5	M1
GO:0055123	digestive system development	5/399	143/17913	0.214515	0.403392	0.285821	CXCL8/CTNNB1/TGFB1/CDKN1A/HIF1A	5	M1
GO:0030041	actin filament polymerization	5/399	145/17913	0.222553	0.407937	0.289041	CORO1A/VASP/CAPG/MYADM/DIAPH1	5	M1
GO:0048754	branching morphogenesis of an epithelial tube	5/399	146/17913	0.226606	0.414171	0.293458	VEGFA/CTSH/CTNNB1/TGFB1/AREG	5	M1
GO:0007093	mitotic cell cycle checkpoint	5/399	147/17913	0.23068	0.417411	0.295753	DUSP1/NABP1/TGFB1/CDKN1A/PLK3	5	M1
GO:0008064	regulation of actin polymerization or depolymerization	5/399	147/17913	0.23068	0.417411	0.295753	CORO1A/VASP/CAPG/PLEK/MYADM	5	M1
GO:0030832	regulation of actin filament length	5/399	148/17913	0.234776	0.417411	0.295753	CORO1A/VASP/CAPG/PLEK/MYADM	5	M1
GO:0007088	regulation of mitotic nuclear division	5/399	150/17913	0.243028	0.425299	0.301343	IL1B/EREG/DUSP1/TGFB1/IL1A	5	M1
GO:0030902	hindbrain development	5/399	150/17913	0.243028	0.425299	0.301343	C5AR1/FLNA/CTNNB1/MAFB/ITGB1	5	M1
GO:0030856	regulation of epithelial cell differentiation	5/399	151/17913	0.247183	0.428036	0.303282	BTG1/IL1B/CTNNB1/CEBPB/ZEB2	5	M1
GO:0045931	positive regulation of mitotic cell cycle	5/399	154/17913	0.259756	0.433739	0.307323	IL1B/EREG/TGFB1/IL1A/ADAM17	5	M1
GO:0006338	chromatin remodeling	5/399	156/17913	0.26822	0.436692	0.309415	KDM6B/CTNNB1/CHD1/H3F3A/PADI4	5	M1
GO:0007519	skeletal muscle tissue development	5/399	156/17913	0.26822	0.436692	0.309415	GPCPD1/CTNNB1/TGFB1/RIPOR2/DDX5	5	M1
GO:0002244	hematopoietic progenitor cell differentiation	5/399	158/17913	0.276745	0.444893	0.315226	PTPRC/TGFB1/PLEK/OSM/INHBA	5	M1
GO:0007266	Rho protein signal transduction	5/399	159/17913	0.281028	0.449552	0.318527	FGD4/SPATA13/AKAP13/RIPOR2/ITGB1	5	M1
GO:0055001	muscle cell development	5/399	159/17913	0.281028	0.449552	0.318527	VEGFA/AKAP13/RIPOR2/ITGB1/ADM	5	M1
GO:0046661	male sex differentiation	5/399	160/17913	0.285324	0.449552	0.318527	FLNA/CTNNB1/H3F3A/RARA/INHBA	5	M1
GO:0006986	response to unfolded protein	5/399	161/17913	0.289633	0.451765	0.320095	CXCL8/THBS1/PPP1R15A/PPP1R15B/ATP6V0D1	5	M1
GO:0007188	adenylate cyclase-modulating G protein-coupled receptor signaling pathway	5/399	162/17913	0.293953	0.456857	0.323703	FPR1/FLNA/AKAP13/FPR2/ADM	5	M1
GO:0051100	negative regulation of binding	5/399	162/17913	0.293953	0.456857	0.323703	CARD16/C9orf72/NFKBIA/LRRK2/RIPOR2	5	M1
GO:0031032	actomyosin structure organization	5/399	163/17913	0.298284	0.459877	0.325842	S100A10/AKAP13/ITGB1/PHACTR1/MYH9	5	M1
GO:0030308	negative regulation of cell growth	5/399	167/17913	0.315707	0.471723	0.334236	BTG1/TGFB1/CDKN1A/CDA/INHBA	5	M1
GO:0050796	regulation of insulin secretion	5/399	169/17913	0.324469	0.478056	0.338723	IL1B/PIM3/HIF1A/TCIRG1/MAP4K4	5	M1
GO:0051783	regulation of nuclear division	5/399	172/17913	0.337658	0.48873	0.346286	IL1B/EREG/DUSP1/TGFB1/IL1A	5	M1
GO:0071478	cellular response to radiation	5/399	173/17913	0.342065	0.493567	0.349713	NAMPT/PTGS2/CARD16/TGFB1/CDKN1A	5	M1
GO:0099003	vesicle-mediated transport in synapse	5/399	174/17913	0.346475	0.493567	0.349713	CTNNB1/LRRK2/NUMB/PRKCB/RAB27A	5	M1
GO:0035966	response to topologically incorrect protein	5/399	175/17913	0.35089	0.496089	0.351501	CXCL8/THBS1/PPP1R15A/PPP1R15B/ATP6V0D1	5	M1
GO:0051168	nuclear export	5/399	176/17913	0.355307	0.501537	0.35536	IL1B/TGFB1/AKAP13/MALT1/RANBP2	5	M1
GO:0006367	transcription initiation from RNA polymerase II promoter	5/399	178/17913	0.364148	0.505323	0.358043	CDKN1A/RARA/CCNH/RXRA/TAF13	5	M1
GO:0007187	G protein-coupled receptor signaling pathway, coupled to cyclic nucleotide second messenger	5/399	178/17913	0.364148	0.505323	0.358043	FPR1/FLNA/AKAP13/FPR2/ADM	5	M1
GO:0010565	regulation of cellular ketone metabolic process	5/399	178/17913	0.364148	0.505323	0.358043	PTGS2/IL1B/PRKAG2/INSIG1/ADM	5	M1
GO:0061013	regulation of mRNA catabolic process	5/399	178/17913	0.364148	0.505323	0.358043	SLC11A1/MYD88/VIM/ZC3H12A/AGO2	5	M1
GO:0007219	Notch signaling pathway	5/399	179/17913	0.36857	0.510531	0.361733	NFKBIA/TGFB1/STAT3/SNAI1/ADAM17	5	M1
GO:0043902	positive regulation of multi-organism process	5/399	180/17913	0.372993	0.515553	0.365291	RIPK2/CHD1/VPS37B/AGO2/INHBA	5	M1
GO:0043401	steroid hormone mediated signaling pathway	5/399	181/17913	0.377416	0.515713	0.365405	CTNNB1/AKAP13/RARA/DDX5/RXRA	5	M1
GO:1905330	regulation of morphogenesis of an epithelium	5/399	181/17913	0.377416	0.515713	0.365405	ITGAX/VEGFA/CTNNB1/TGFB1/RXRA	5	M1
GO:0009952	anterior/posterior pattern specification	5/399	182/17913	0.381839	0.520477	0.36878	ETS2/CTNNB1/BASP1/ATP6AP2/ZEB2	5	M1
GO:0048639	positive regulation of developmental growth	5/399	183/17913	0.38626	0.525177	0.372111	VEGFA/BASP1/NDEL1/EZR/SASH3	5	M1
GO:0007179	transforming growth factor beta receptor signaling pathway	5/399	184/17913	0.39068	0.525177	0.372111	THBS1/TGFB1/SKIL/USP15/ADAM17	5	M1
GO:1902905	positive regulation of supramolecular fiber organization	5/399	185/17913	0.395098	0.529607	0.375249	FLNA/S100A10/CORO1A/VASP/PLEK	5	M1
GO:0000075	cell cycle checkpoint	5/399	197/17913	0.44775	0.567023	0.40176	DUSP1/NABP1/TGFB1/CDKN1A/PLK3	5	M1
GO:0051495	positive regulation of cytoskeleton organization	5/399	205/17913	0.482217	0.590321	0.418268	FLNA/S100A10/CORO1A/VASP/PLEK	5	M1
GO:0046474	glycerophospholipid biosynthetic process	5/399	213/17913	0.515924	0.614656	0.43551	GPAT3/LPCAT1/CAPN2/ACSL3/FPR2	5	M1
GO:0051258	protein polymerization	5/399	232/17913	0.591922	0.673431	0.477155	CORO1A/VASP/CAPG/MYADM/DIAPH1	5	M1
GO:0000086	G2/M transition of mitotic cell cycle	5/399	238/17913	0.61452	0.69048	0.489235	CDKN1A/PHLDA1/BACH1/PLK3/CCNH	5	M1
GO:0016054	organic acid catabolic process	5/399	250/17913	0.657449	0.721215	0.511012	CD44/KYNU/TGFB1/PADI4/CYP4F3	5	M1
GO:0046395	carboxylic acid catabolic process	5/399	250/17913	0.657449	0.721215	0.511012	CD44/KYNU/TGFB1/PADI4/CYP4F3	5	M1
GO:0008654	phospholipid biosynthetic process	5/399	251/17913	0.660885	0.723868	0.512892	GPAT3/LPCAT1/CAPN2/ACSL3/FPR2	5	M1
GO:0044839	cell cycle G2/M phase transition	5/399	257/17913	0.681031	0.741774	0.525579	CDKN1A/PHLDA1/BACH1/PLK3/CCNH	5	M1
GO:0043414	macromolecule methylation	5/399	276/17913	0.73942	0.788183	0.558461	CTNNB1/TET2/JARID2/PRMT9/TRMT6	5	M1
GO:0048562	embryonic organ morphogenesis	5/399	276/17913	0.73942	0.788183	0.558461	CTNNB1/MAFB/RIPOR2/HIF1A/INSIG1	5	M1
GO:0032259	methylation	5/399	336/17913	0.872041	0.898105	0.636346	CTNNB1/TET2/JARID2/PRMT9/TRMT6	5	M1
GO:0010948	negative regulation of cell cycle process	5/399	344/17913	0.88447	0.908171	0.643478	EVI2B/DUSP1/CDKN1A/PLK3/RYBP	5	M1
GO:0009913	epidermal cell differentiation	5/399	346/17913	0.887412	0.910202	0.644918	EREG/FOSL2/CTNNB1/RIPOR2/CSTA	5	M1
GO:0006520	cellular amino acid metabolic process	5/399	347/17913	0.888858	0.911413	0.645775	SLC7A7/KYNU/SLC7A5/WARS/PADI4	5	M1
GO:0042391	regulation of membrane potential	5/399	374/17913	0.922297	0.937053	0.663943	FLNA/LRRK2/BID/TSPO/ATP1B3	5	M1
GO:0032494	response to peptidoglycan	4/399	11/17913	7.07e-05	0.00115089	0.000815453	C5AR1/NLRP3/RIPK2/IL6	4	M1
GO:0002468	dendritic cell antigen processing and presentation	4/399	12/17913	0.000104165	0.00161329	0.00114308	SLC11A1/CLEC4A/THBS1/FGL2	4	M1
GO:0045086	positive regulation of interleukin-2 biosynthetic process	4/399	13/17913	0.000147821	0.0021614	0.00153144	PTPRC/IL1B/CD86/IL1A	4	M1
GO:0090594	inflammatory response to wounding	4/399	13/17913	0.000147821	0.0021614	0.00153144	TIMP1/TGFB1/HIF1A/IL1A	4	M1
GO:0050713	negative regulation of interleukin-1 beta secretion	4/399	14/17913	0.000203321	0.00279617	0.00198121	NLRP3/CARD16/TNFAIP3/ZC3H12A	4	M1
GO:0034134	toll-like receptor 2 signaling pathway	4/399	15/17913	0.000272399	0.00357172	0.00253072	RIPK2/TLR2/TNFAIP3/LYN	4	M1
GO:1901741	positive regulation of myoblast fusion	4/399	15/17913	0.000272399	0.00357172	0.00253072	EHD1/CD53/RIPOR2/CAPN2	4	M1
GO:2000484	positive regulation of interleukin-8 secretion	4/399	15/17913	0.000272399	0.00357172	0.00253072	FCN1/TLR2/CD14/FFAR2	4	M1
GO:0002830	positive regulation of type 2 immune response	4/399	16/17913	0.000356841	0.0044555	0.00315691	NLRP3/RARA/CD86/IL6	4	M1
GO:0032740	positive regulation of interleukin-17 production	4/399	17/17913	0.000458475	0.00544493	0.00385797	MYD88/TGFB1/OSM/IL6	4	M1
GO:0032930	positive regulation of superoxide anion generation	4/399	17/17913	0.000458475	0.00544493	0.00385797	ITGB2/TGFB1/ITGAM/FPR2	4	M1
GO:0042789	mRNA transcription by RNA polymerase II	4/399	18/17913	0.000579165	0.00656732	0.00465323	C5AR1/FLNA/HIF1A/STAT3	4	M1
GO:1901739	regulation of myoblast fusion	4/399	18/17913	0.000579165	0.00656732	0.00465323	EHD1/CD53/RIPOR2/CAPN2	4	M1
GO:2000319	regulation of T-helper 17 cell differentiation	4/399	18/17913	0.000579165	0.00656732	0.00465323	NLRP3/NFKBIZ/MALT1/ZC3H12A	4	M1
GO:0002577	regulation of antigen processing and presentation	4/399	19/17913	0.000720795	0.00762842	0.00540506	SLC11A1/LILRB2/THBS1/FGL2	4	M1
GO:0032495	response to muramyl dipeptide	4/399	19/17913	0.000720795	0.00762842	0.00540506	RIPK2/NFKBIA/TNFAIP3/VIM	4	M1
GO:0045076	regulation of interleukin-2 biosynthetic process	4/399	19/17913	0.000720795	0.00762842	0.00540506	PTPRC/IL1B/CD86/IL1A	4	M1
GO:0060252	positive regulation of glial cell proliferation	4/399	19/17913	0.000720795	0.00762842	0.00540506	IL1B/TSPO/LYN/IL6	4	M1
GO:0071071	regulation of phospholipid biosynthetic process	4/399	19/17913	0.000720795	0.00762842	0.00540506	LPCAT1/CAPN2/ACSL3/FPR2	4	M1
GO:0032928	regulation of superoxide anion generation	4/399	21/17913	0.0010745	0.0104282	0.00738885	ITGB2/TGFB1/ITGAM/FPR2	4	M1
GO:0035743	CD4-positive, alpha-beta T cell cytokine production	4/399	21/17913	0.0010745	0.0104282	0.00738885	CD55/NLRP3/IL1B/IL6	4	M1
GO:0051043	regulation of membrane protein ectodomain proteolysis	4/399	21/17913	0.0010745	0.0104282	0.00738885	TIMP1/TNFRSF1B/IL1B/ADAM8	4	M1
GO:0097709	connective tissue replacement	4/399	21/17913	0.0010745	0.0104282	0.00738885	TIMP1/TGFB1/HIF1A/IL1A	4	M1
GO:2000316	regulation of T-helper 17 type immune response	4/399	21/17913	0.0010745	0.0104282	0.00738885	NLRP3/NFKBIZ/MALT1/ZC3H12A	4	M1
GO:0042094	interleukin-2 biosynthetic process	4/399	22/17913	0.00129039	0.0118753	0.00841416	PTPRC/IL1B/CD86/IL1A	4	M1
GO:0043302	positive regulation of leukocyte degranulation	4/399	22/17913	0.00129039	0.0118753	0.00841416	ITGB2/FGR/FCER1G/ITGAM	4	M1
GO:0031579	membrane raft organization	4/399	23/17913	0.00153485	0.013325	0.00944132	PTPRC/S100A10/ANXA2/MYADM	4	M1
GO:0060143	positive regulation of syncytium formation by plasma membrane fusion	4/399	23/17913	0.00153485	0.013325	0.00944132	EHD1/CD53/RIPOR2/CAPN2	4	M1
GO:2000637	positive regulation of gene silencing by miRNA	4/399	23/17913	0.00153485	0.013325	0.00944132	TGFB1/DDX5/STAT3/AGO2	4	M1
GO:0046135	pyrimidine nucleoside catabolic process	4/399	24/17913	0.00180977	0.0147875	0.0104776	TYMP/UPP1/APOBEC3A/CDA	4	M1
GO:0048143	astrocyte activation	4/399	24/17913	0.00180977	0.0147875	0.0104776	C5AR1/IL1B/FPR2/IL6	4	M1
GO:0060148	positive regulation of posttranscriptional gene silencing	4/399	24/17913	0.00180977	0.0147875	0.0104776	TGFB1/DDX5/STAT3/AGO2	4	M1
GO:0030194	positive regulation of blood coagulation	4/399	25/17913	0.00211703	0.0165381	0.011718	THBS1/PLEK/THBD/F3	4	M1
GO:0031664	regulation of lipopolysaccharide-mediated signaling pathway	4/399	25/17913	0.00211703	0.0165381	0.011718	CD55/CARD16/TNFAIP3/TRIB1	4	M1
GO:0042730	fibrinolysis	4/399	25/17913	0.00211703	0.0165381	0.011718	PLAUR/THBS1/SERPINB2/THBD	4	M1
GO:0045408	regulation of interleukin-6 biosynthetic process	4/399	25/17913	0.00211703	0.0165381	0.011718	IL1B/EREG/CEBPB/STAT3	4	M1
GO:1900048	positive regulation of hemostasis	4/399	25/17913	0.00211703	0.0165381	0.011718	THBS1/PLEK/THBD/F3	4	M1
GO:2000482	regulation of interleukin-8 secretion	4/399	25/17913	0.00211703	0.0165381	0.011718	FCN1/TLR2/CD14/FFAR2	4	M1
GO:0002507	tolerance induction	4/399	26/17913	0.00245847	0.0184593	0.0130792	LILRB2/TGFB1/TNFAIP3/LYN	4	M1
GO:0016577	histone demethylation	4/399	26/17913	0.00245847	0.0184593	0.0130792	KDM6B/JARID2/KDM7A/JMJD6	4	M1
GO:0034114	regulation of heterotypic cell-cell adhesion	4/399	26/17913	0.00245847	0.0184593	0.0130792	CD44/IL1B/IL1RN/MYADM	4	M1
GO:0050820	positive regulation of coagulation	4/399	26/17913	0.00245847	0.0184593	0.0130792	THBS1/PLEK/THBD/F3	4	M1
GO:0060142	regulation of syncytium formation by plasma membrane fusion	4/399	26/17913	0.00245847	0.0184593	0.0130792	EHD1/CD53/RIPOR2/CAPN2	4	M1
GO:0001782	B cell homeostasis	4/399	27/17913	0.00283593	0.0203196	0.0143973	TNFAIP3/HIF1A/LYN/DOCK10	4	M1
GO:0042226	interleukin-6 biosynthetic process	4/399	27/17913	0.00283593	0.0203196	0.0143973	IL1B/EREG/CEBPB/STAT3	4	M1
GO:0046640	regulation of alpha-beta T cell proliferation	4/399	27/17913	0.00283593	0.0203196	0.0143973	CD55/PTPRC/RIPK2/VSIR	4	M1
GO:0046885	regulation of hormone biosynthetic process	4/399	27/17913	0.00283593	0.0203196	0.0143973	IL1B/HIF1A/NFKB1/ADM	4	M1
GO:1902624	positive regulation of neutrophil migration	4/399	27/17913	0.00283593	0.0203196	0.0143973	C5AR1/CXCL8/ADAM8/RIPOR2	4	M1
GO:0006482	protein demethylation	4/399	28/17913	0.0032512	0.0224403	0.0158999	KDM6B/JARID2/KDM7A/JMJD6	4	M1
GO:0008214	protein dealkylation	4/399	28/17913	0.0032512	0.0224403	0.0158999	KDM6B/JARID2/KDM7A/JMJD6	4	M1
GO:0033032	regulation of myeloid cell apoptotic process	4/399	28/17913	0.0032512	0.0224403	0.0158999	FCER1G/ADAM17/HCAR2/CLEC5A	4	M1
GO:0048265	response to pain	4/399	28/17913	0.0032512	0.0224403	0.0158999	GCH1/THBS1/TSPO/CAPN2	4	M1
GO:0050869	negative regulation of B cell activation	4/399	28/17913	0.0032512	0.0224403	0.0158999	SAMSN1/TNFAIP3/MNDA/INHBA	4	M1
GO:0070306	lens fiber cell differentiation	4/399	28/17913	0.0032512	0.0224403	0.0158999	TGFB1/SKIL/VIM/ZEB2	4	M1
GO:1990776	response to angiotensin	4/399	28/17913	0.0032512	0.0224403	0.0158999	PTGS2/CYBB/NFKB1/IQGAP1	4	M1
GO:0010737	protein kinase A signaling	4/399	29/17913	0.00370602	0.0246237	0.017447	PDE4A/LRRK2/EZR/LCP1	4	M1
GO:0045980	negative regulation of nucleotide metabolic process	4/399	29/17913	0.00370602	0.0246237	0.017447	PPIF/TSPO/STAT3/CDA	4	M1
GO:0050718	positive regulation of interleukin-1 beta secretion	4/399	29/17913	0.00370602	0.0246237	0.017447	NLRP3/LILRA5/CASP1/RIPK2	4	M1
GO:0070102	interleukin-6-mediated signaling pathway	4/399	29/17913	0.00370602	0.0246237	0.017447	SOCS3/STAT3/IL6R/IL6	4	M1
GO:0072606	interleukin-8 secretion	4/399	29/17913	0.00370602	0.0246237	0.017447	FCN1/TLR2/CD14/FFAR2	4	M1
GO:0002828	regulation of type 2 immune response	4/399	30/17913	0.00420212	0.0266835	0.0189064	NLRP3/RARA/CD86/IL6	4	M1
GO:0032689	negative regulation of interferon-gamma production	4/399	30/17913	0.00420212	0.0266835	0.0189064	RARA/VSIR/ZC3H12A/INHBA	4	M1
GO:0046633	alpha-beta T cell proliferation	4/399	30/17913	0.00420212	0.0266835	0.0189064	CD55/PTPRC/RIPK2/VSIR	4	M1
GO:0090022	regulation of neutrophil chemotaxis	4/399	30/17913	0.00420212	0.0266835	0.0189064	C5AR1/CXCL8/RIPOR2/BST1	4	M1
GO:0045648	positive regulation of erythrocyte differentiation	4/399	31/17913	0.00474117	0.0293517	0.0207969	FOXO3/HIF1A/STAT3/INHBA	4	M1
GO:0045742	positive regulation of epidermal growth factor receptor signaling pathway	4/399	31/17913	0.00474117	0.0293517	0.0207969	PLAUR/EREG/NCF1/ADAM17	4	M1
GO:0051385	response to mineralocorticoid	4/399	31/17913	0.00474117	0.0293517	0.0207969	ATP2B1/CYBB/FOXO3/CDKN1A	4	M1
GO:0032733	positive regulation of interleukin-10 production	4/399	32/17913	0.00532479	0.0318127	0.0225407	LILRA5/FCER1G/TLR2/SASH3	4	M1
GO:0043552	positive regulation of phosphatidylinositol 3-kinase activity	4/399	32/17913	0.00532479	0.0318127	0.0225407	FGR/TGFB1/LYN/FPR2	4	M1
GO:1900745	positive regulation of p38MAPK cascade	4/399	32/17913	0.00532479	0.0318127	0.0225407	IL1B/VEGFA/NCF1/ZC3H12A	4	M1
GO:1901099	negative regulation of signal transduction in absence of ligand	4/399	32/17913	0.00532479	0.0318127	0.0225407	IL1B/MCL1/IL1A/FYN	4	M1
GO:2001240	negative regulation of extrinsic apoptotic signaling pathway in absence of ligand	4/399	32/17913	0.00532479	0.0318127	0.0225407	IL1B/MCL1/IL1A/FYN	4	M1
GO:0043032	positive regulation of macrophage activation	4/399	33/17913	0.00595455	0.0346103	0.0245229	ITGB2/THBS1/LRRK2/ITGAM	4	M1
GO:0043094	cellular metabolic compound salvage	4/399	33/17913	0.00595455	0.0346103	0.0245229	TYMP/UPP1/PNP/CDA	4	M1
GO:0055094	response to lipoprotein particle	4/399	33/17913	0.00595455	0.0346103	0.0245229	ITGB2/FCER1G/MYD88/ITGB1	4	M1
GO:1901186	positive regulation of ERBB signaling pathway	4/399	33/17913	0.00595455	0.0346103	0.0245229	PLAUR/EREG/NCF1/ADAM17	4	M1
GO:0032691	negative regulation of interleukin-1 beta production	4/399	34/17913	0.00663199	0.037601	0.0266419	NLRP3/CARD16/TNFAIP3/ZC3H12A	4	M1
GO:0010831	positive regulation of myotube differentiation	4/399	35/17913	0.00735857	0.0404813	0.0286827	EHD1/CD53/RIPOR2/CAPN2	4	M1
GO:0042092	type 2 immune response	4/399	35/17913	0.00735857	0.0404813	0.0286827	NLRP3/RARA/CD86/IL6	4	M1
GO:0050716	positive regulation of interleukin-1 secretion	4/399	35/17913	0.00735857	0.0404813	0.0286827	NLRP3/LILRA5/CASP1/RIPK2	4	M1
GO:0070423	nucleotide-binding oligomerization domain containing signaling pathway	4/399	35/17913	0.00735857	0.0404813	0.0286827	RIPK2/NFKBIA/TNFAIP3/BIRC3	4	M1
GO:0010742	macrophage derived foam cell differentiation	4/399	36/17913	0.00813571	0.0428868	0.0303872	NFKBIA/TGFB1/SELENOK/NFKB1	4	M1
GO:0035872	nucleotide-binding domain, leucine rich repeat containing receptor signaling pathway	4/399	36/17913	0.00813571	0.0428868	0.0303872	RIPK2/NFKBIA/TNFAIP3/BIRC3	4	M1
GO:0060251	regulation of glial cell proliferation	4/399	36/17913	0.00813571	0.0428868	0.0303872	IL1B/TSPO/LYN/IL6	4	M1
GO:0071634	regulation of transforming growth factor beta production	4/399	36/17913	0.00813571	0.0428868	0.0303872	PTGS2/THBS1/HIF1A/ATP6AP2	4	M1
GO:0090077	foam cell differentiation	4/399	36/17913	0.00813571	0.0428868	0.0303872	NFKBIA/TGFB1/SELENOK/NFKB1	4	M1
GO:0090218	positive regulation of lipid kinase activity	4/399	36/17913	0.00813571	0.0428868	0.0303872	FGR/TGFB1/LYN/FPR2	4	M1
GO:1905332	positive regulation of morphogenesis of an epithelium	4/399	36/17913	0.00813571	0.0428868	0.0303872	ITGAX/VEGFA/CTNNB1/TGFB1	4	M1
GO:0030212	hyaluronan metabolic process	4/399	37/17913	0.00896477	0.0461743	0.0327165	CD44/IL1B/TGFB1/NFKB1	4	M1
GO:0042307	positive regulation of protein import into nucleus	4/399	37/17913	0.00896477	0.0461743	0.0327165	PTGS2/FLNA/TGFB1/ZC3H12A	4	M1
GO:0050691	regulation of defense response to virus by host	4/399	37/17913	0.00896477	0.0461743	0.0327165	IL1B/TNFAIP3/SELENOK/ZC3H12A	4	M1
GO:1903427	negative regulation of reactive oxygen species biosynthetic process	4/399	37/17913	0.00896477	0.0461743	0.0327165	TSPO/FYN/STAT3/ZC3H12A	4	M1
GO:2000648	positive regulation of stem cell proliferation	4/399	37/17913	0.00896477	0.0461743	0.0327165	PTPRC/VEGFA/CTNNB1/HIF1A	4	M1
GO:0032350	regulation of hormone metabolic process	4/399	38/17913	0.00984705	0.0494578	0.035043	IL1B/HIF1A/NFKB1/ADM	4	M1
GO:0043277	apoptotic cell clearance	4/399	38/17913	0.00984705	0.0494578	0.035043	FCN1/THBS1/RARA/JMJD6	4	M1
GO:0043331	response to dsRNA	4/399	38/17913	0.00984705	0.0494578	0.035043	RIPK2/NFKBIA/NFKB1/DDX21	4	M1
GO:0071604	transforming growth factor beta production	4/399	38/17913	0.00984705	0.0494578	0.035043	PTGS2/THBS1/HIF1A/ATP6AP2	4	M1
GO:1902229	regulation of intrinsic apoptotic signaling pathway in response to DNA damage	4/399	39/17913	0.0107838	0.0528366	0.037437	CD44/BID/SKIL/SNAI1	4	M1
GO:1904591	positive regulation of protein import	4/399	39/17913	0.0107838	0.0528366	0.037437	PTGS2/FLNA/TGFB1/ZC3H12A	4	M1
GO:0033574	response to testosterone	4/399	40/17913	0.0117761	0.0564062	0.0399662	DUSP1/THBS1/MSN/TSPO	4	M1
GO:0042036	negative regulation of cytokine biosynthetic process	4/399	40/17913	0.0117761	0.0564062	0.0399662	PTPRC/NFKB1/INHBA/IL6	4	M1
GO:2000273	positive regulation of signaling receptor activity	4/399	40/17913	0.0117761	0.0564062	0.0399662	EREG/ITGB1/NCF1/ADAM17	4	M1
GO:0008631	intrinsic apoptotic signaling pathway in response to oxidative stress	4/399	41/17913	0.0128253	0.0599456	0.0424741	SOD2/MCL1/CYP1B1/HIF1A	4	M1
GO:0050873	brown fat cell differentiation	4/399	41/17913	0.0128253	0.0599456	0.0424741	PTGS2/METRNL/CEBPB/LAMB3	4	M1
GO:0090184	positive regulation of kidney development	4/399	41/17913	0.0128253	0.0599456	0.0424741	VEGFA/TGFB1/BASP1/IL6R	4	M1
GO:0032731	positive regulation of interleukin-1 beta production	4/399	42/17913	0.0139322	0.0639485	0.0453103	NLRP3/LILRA5/CASP1/RIPK2	4	M1
GO:0035307	positive regulation of protein dephosphorylation	4/399	42/17913	0.0139322	0.0639485	0.0453103	PTPRC/LILRB2/TGFB1/PPP1R15A	4	M1
GO:0045429	positive regulation of nitric oxide biosynthetic process	4/399	42/17913	0.0139322	0.0639485	0.0453103	PTGS2/IL1B/ITGB2/PTX3	4	M1
GO:0009409	response to cold	4/399	43/17913	0.0150979	0.0683404	0.0484221	ATP2B1/METRNL/NFKBIA/ADM	4	M1
GO:0097028	dendritic cell differentiation	4/399	43/17913	0.0150979	0.0683404	0.0484221	LILRB2/TGFB1/LYN/CEBPB	4	M1
GO:1904407	positive regulation of nitric oxide metabolic process	4/399	43/17913	0.0150979	0.0683404	0.0484221	PTGS2/IL1B/ITGB2/PTX3	4	M1
GO:1904646	cellular response to amyloid-beta	4/399	43/17913	0.0150979	0.0683404	0.0484221	NAMPT/FOXO3/FYN/FPR2	4	M1
GO:0035196	production of miRNAs involved in gene silencing by miRNA	4/399	44/17913	0.0163234	0.0725574	0.05141	TGFB1/DDX5/ZC3H12A/AGO2	4	M1
GO:0072523	purine-containing compound catabolic process	4/399	44/17913	0.0163234	0.0725574	0.05141	PDE4B/PDE4A/PNP/ADA2	4	M1
GO:0022602	ovulation cycle process	4/399	45/17913	0.0176094	0.0762903	0.054055	EREG/FOXO3/PTX3/INHBA	4	M1
GO:0032570	response to progesterone	4/399	45/17913	0.0176094	0.0762903	0.054055	THBS1/TLR2/TGFB1/TSPO	4	M1
GO:0061756	leukocyte adhesion to vascular endothelial cell	4/399	45/17913	0.0176094	0.0762903	0.054055	ITGB2/SELL/ITGB1/NFAT5	4	M1
GO:0072604	interleukin-6 secretion	4/399	45/17913	0.0176094	0.0762903	0.054055	IL1B/LILRA5/SELENOK/ZC3H12A	4	M1
GO:1903018	regulation of glycoprotein metabolic process	4/399	45/17913	0.0176094	0.0762903	0.054055	HBEGF/CTNNB1/PTX3/AGO2	4	M1
GO:0006984	ER-nucleus signaling pathway	4/399	46/17913	0.0189569	0.0809446	0.0573527	CXCL8/PPP1R15A/PPP1R15B/INSIG1	4	M1
GO:0031638	zymogen activation	4/399	46/17913	0.0189569	0.0809446	0.0573527	CTSH/RIPK2/THBS1/VSIR	4	M1
GO:0061614	pri-miRNA transcription by RNA polymerase II	4/399	46/17913	0.0189569	0.0809446	0.0573527	TGFB1/HIF1A/DDX5/STAT3	4	M1
GO:1900015	regulation of cytokine production involved in inflammatory response	4/399	46/17913	0.0189569	0.0809446	0.0573527	MYD88/GPSM3/IL1R2/ZC3H12A	4	M1
GO:0001961	positive regulation of cytokine-mediated signaling pathway	4/399	47/17913	0.0203665	0.0832067	0.0589556	CASP1/RIPK2/HIF1A/ADAM17	4	M1
GO:0002832	negative regulation of response to biotic stimulus	4/399	47/17913	0.0203665	0.0832067	0.0589556	CARD16/FGL2/TNFAIP3/TRIB1	4	M1
GO:0042743	hydrogen peroxide metabolic process	4/399	47/17913	0.0203665	0.0832067	0.0589556	CYBB/FYN/STAT3/HP	4	M1
GO:0010171	body morphogenesis	4/399	48/17913	0.0218389	0.0876909	0.0621328	TGFB1/CSRNP1/ATP6AP2/ZNF281	4	M1
GO:0031050	dsRNA processing	4/399	48/17913	0.0218389	0.0876909	0.0621328	TGFB1/DDX5/ZC3H12A/AGO2	4	M1
GO:0044003	modification by symbiont of host morphology or physiology	4/399	48/17913	0.0218389	0.0876909	0.0621328	SERPINB9/TGFB1/RXRA/ZC3H12A	4	M1
GO:0045840	positive regulation of mitotic nuclear division	4/399	48/17913	0.0218389	0.0876909	0.0621328	IL1B/EREG/TGFB1/IL1A	4	M1
GO:0051452	intracellular pH reduction	4/399	48/17913	0.0218389	0.0876909	0.0621328	SLC11A1/TCIRG1/ATP6V0D1/ATP6V1B2	4	M1
GO:0061951	establishment of protein localization to plasma membrane	4/399	48/17913	0.0218389	0.0876909	0.0621328	RILPL2/RAB31/GRASP/ACSL3	4	M1
GO:0070918	production of small RNA involved in gene silencing by RNA	4/399	48/17913	0.0218389	0.0876909	0.0621328	TGFB1/DDX5/ZC3H12A/AGO2	4	M1
GO:0000186	activation of MAPKK activity	4/399	49/17913	0.0233747	0.0920338	0.0652099	MAP3K8/RIPK2/MAP3K2/LRRK2	4	M1
GO:0002534	cytokine production involved in inflammatory response	4/399	49/17913	0.0233747	0.0920338	0.0652099	MYD88/GPSM3/IL1R2/ZC3H12A	4	M1
GO:0030195	negative regulation of blood coagulation	4/399	49/17913	0.0233747	0.0920338	0.0652099	PLAUR/THBS1/SERPINB2/THBD	4	M1
GO:0032732	positive regulation of interleukin-1 production	4/399	50/17913	0.0249746	0.0952892	0.0675165	NLRP3/LILRA5/CASP1/RIPK2	4	M1
GO:0045851	pH reduction	4/399	50/17913	0.0249746	0.0952892	0.0675165	SLC11A1/TCIRG1/ATP6V0D1/ATP6V1B2	4	M1
GO:1900047	negative regulation of hemostasis	4/399	50/17913	0.0249746	0.0952892	0.0675165	PLAUR/THBS1/SERPINB2/THBD	4	M1
GO:0006213	pyrimidine nucleoside metabolic process	4/399	51/17913	0.0266389	0.0998396	0.0707407	TYMP/UPP1/APOBEC3A/CDA	4	M1
GO:0072528	pyrimidine-containing compound biosynthetic process	4/399	52/17913	0.0283681	0.103747	0.0735091	GPAT3/TYMP/UPP1/CDA	4	M1
GO:0030166	proteoglycan biosynthetic process	4/399	53/17913	0.0301626	0.108385	0.0767958	VCAN/CTNNB1/DSE/CSGALNACT2	4	M1
GO:0042130	negative regulation of T cell proliferation	4/399	53/17913	0.0301626	0.108385	0.0767958	LILRB2/TGFB1/VSIR/CEBPB	4	M1
GO:0050819	negative regulation of coagulation	4/399	53/17913	0.0301626	0.108385	0.0767958	PLAUR/THBS1/SERPINB2/THBD	4	M1
GO:0042304	regulation of fatty acid biosynthetic process	4/399	54/17913	0.0320227	0.113419	0.0803624	PTGS2/IL1B/PRKAG2/INSIG1	4	M1
GO:0071385	cellular response to glucocorticoid stimulus	4/399	54/17913	0.0320227	0.113419	0.0803624	ATP2B1/TGFB1/FOXO3/AKAP13	4	M1
GO:0097755	positive regulation of blood vessel diameter	4/399	54/17913	0.0320227	0.113419	0.0803624	SOD2/GCH1/SCPEP1/ADM	4	M1
GO:0099132	ATP hydrolysis coupled cation transmembrane transport	4/399	54/17913	0.0320227	0.113419	0.0803624	ATP2B1/TCIRG1/ATP6V0D1/ATP6V1B2	4	M1
GO:1904645	response to amyloid-beta	4/399	54/17913	0.0320227	0.113419	0.0803624	NAMPT/FOXO3/FYN/FPR2	4	M1
GO:0002066	columnar/cuboidal epithelial cell development	4/399	55/17913	0.0339487	0.115989	0.0821834	CDKN1A/RIPOR2/RARA/HIF1A	4	M1
GO:0002381	immunoglobulin production involved in immunoglobulin mediated immune response	4/399	55/17913	0.0339487	0.115989	0.0821834	PTPRC/TGFB1/FGL2/POU2F2	4	M1
GO:0031102	neuron projection regeneration	4/399	55/17913	0.0339487	0.115989	0.0821834	TSPO/NDEL1/MAP4K4/ADM	4	M1
GO:0031295	T cell costimulation	4/399	55/17913	0.0339487	0.115989	0.0821834	MAP3K8/LYN/CD86/FYN	4	M1
GO:0042306	regulation of protein import into nucleus	4/399	55/17913	0.0339487	0.115989	0.0821834	PTGS2/FLNA/TGFB1/ZC3H12A	4	M1
GO:0048008	platelet-derived growth factor receptor signaling pathway	4/399	55/17913	0.0339487	0.115989	0.0821834	VEGFA/CSRNP1/IQGAP1/F3	4	M1
GO:0031294	lymphocyte costimulation	4/399	56/17913	0.0359408	0.122232	0.0866063	MAP3K8/LYN/CD86/FYN	4	M1
GO:0001836	release of cytochrome c from mitochondria	4/399	57/17913	0.037999	0.126426	0.0895785	PLAUR/SOD2/PPIF/BID	4	M1
GO:0032507	maintenance of protein location in cell	4/399	57/17913	0.037999	0.126426	0.0895785	TSPO/EZR/HK2/INSIG1	4	M1
GO:0043525	positive regulation of neuron apoptotic process	4/399	57/17913	0.037999	0.126426	0.0895785	MCL1/CTNNB1/FOXO3/ITGAM	4	M1
GO:0051055	negative regulation of lipid biosynthetic process	4/399	57/17913	0.037999	0.126426	0.0895785	NFKB1/LPCAT1/SNAI1/INSIG1	4	M1
GO:0015807	L-amino acid transport	4/399	58/17913	0.0401235	0.132013	0.0935366	SLC11A1/SLC43A2/SLC7A7/SLC7A5	4	M1
GO:0046847	filopodium assembly	4/399	58/17913	0.0401235	0.132013	0.0935366	FGD4/SPATA13/EZR/RIPOR2	4	M1
GO:0071384	cellular response to corticosteroid stimulus	4/399	58/17913	0.0401235	0.132013	0.0935366	ATP2B1/TGFB1/FOXO3/AKAP13	4	M1
GO:1904589	regulation of protein import	4/399	58/17913	0.0401235	0.132013	0.0935366	PTGS2/FLNA/TGFB1/ZC3H12A	4	M1
GO:0010830	regulation of myotube differentiation	4/399	59/17913	0.0423143	0.13724	0.0972408	EHD1/CD53/RIPOR2/CAPN2	4	M1
GO:0034394	protein localization to cell surface	4/399	59/17913	0.0423143	0.13724	0.0972408	FCN1/FLNA/FCER1G/CTNNB1	4	M1
GO:0032371	regulation of sterol transport	4/399	60/17913	0.0445715	0.141717	0.100413	NFKBIA/TSPO/NFKB1/ANXA2	4	M1
GO:0032374	regulation of cholesterol transport	4/399	60/17913	0.0445715	0.141717	0.100413	NFKBIA/TSPO/NFKB1/ANXA2	4	M1
GO:0051785	positive regulation of nuclear division	4/399	60/17913	0.0445715	0.141717	0.100413	IL1B/EREG/TGFB1/IL1A	4	M1
GO:1905953	negative regulation of lipid localization	4/399	60/17913	0.0445715	0.141717	0.100413	NFKBIA/THBS1/NFKB1/IL6	4	M1
GO:0002753	cytoplasmic pattern recognition receptor signaling pathway	4/399	61/17913	0.0468948	0.14648	0.103787	RIPK2/NFKBIA/TNFAIP3/BIRC3	4	M1
GO:0006027	glycosaminoglycan catabolic process	4/399	61/17913	0.0468948	0.14648	0.103787	CD44/VCAN/TGFB1/HGSNAT	4	M1
GO:0032835	glomerulus development	4/399	61/17913	0.0468948	0.14648	0.103787	SULF2/BASP1/IL6R/IQGAP1	4	M1
GO:0070265	necrotic cell death	4/399	62/17913	0.0492843	0.150874	0.106901	PPIF/CD14/TSPO/BIRC3	4	M1
GO:0006026	aminoglycan catabolic process	4/399	63/17913	0.0517397	0.1572	0.111383	CD44/VCAN/TGFB1/HGSNAT	4	M1
GO:0030101	natural killer cell activation	4/399	63/17913	0.0517397	0.1572	0.111383	PTPRC/ITGB2/CORO1A/RAB27A	4	M1
GO:0071277	cellular response to calcium ion	4/399	63/17913	0.0517397	0.1572	0.111383	PPIF/JUNB/IQGAP1/ALOX5AP	4	M1
GO:0140029	exocytic process	4/399	63/17913	0.0517397	0.1572	0.111383	FCER1G/LYN/PLEK/STXBP2	4	M1
GO:0032768	regulation of monooxygenase activity	4/399	64/17913	0.0542609	0.161115	0.114157	IL1B/GCH1/HIF1A/NFKB1	4	M1
GO:0045670	regulation of osteoclast differentiation	4/399	64/17913	0.0542609	0.161115	0.114157	LILRB3/CTNNB1/MAFB/CEBPB	4	M1
GO:0071230	cellular response to amino acid stimulus	4/399	64/17913	0.0542609	0.161115	0.114157	CYBB/CEBPB/FYN/CAPN2	4	M1
GO:0061035	regulation of cartilage development	4/399	66/17913	0.0594992	0.172352	0.122119	CTNNB1/TGFB1/RARA/TRPS1	4	M1
GO:1900076	regulation of cellular response to insulin stimulus	4/399	66/17913	0.0594992	0.172352	0.122119	ATP2B1/IL1B/PTPRE/PRKCB	4	M1
GO:0045669	positive regulation of osteoblast differentiation	4/399	67/17913	0.0622157	0.177135	0.125508	CTNNB1/CEBPB/IL6R/IL6	4	M1
GO:0061180	mammary gland epithelium development	4/399	67/17913	0.0622157	0.177135	0.125508	TGFB1/HIF1A/AREG/CEBPB	4	M1
GO:0042698	ovulation cycle	4/399	68/17913	0.0649966	0.182277	0.129151	EREG/FOXO3/PTX3/INHBA	4	M1
GO:0050805	negative regulation of synaptic transmission	4/399	68/17913	0.0649966	0.182277	0.129151	PTGS2/IL1B/LILRB2/LRRK2	4	M1
GO:0061515	myeloid cell development	4/399	68/17913	0.0649966	0.182277	0.129151	EVI2B/TLR2/ANXA2/JMJD6	4	M1
GO:0006446	regulation of translational initiation	4/399	69/17913	0.0678414	0.185616	0.131517	PPP1R15A/PPP1R15B/RXRA/AGO2	4	M1
GO:0048662	negative regulation of smooth muscle cell proliferation	4/399	69/17913	0.0678414	0.185616	0.131517	SOD2/CDKN1A/TNFAIP3/TRIB1	4	M1
GO:0050871	positive regulation of B cell activation	4/399	70/17913	0.0707498	0.191408	0.135621	PTPRC/TGFB1/CDKN1A/IL6	4	M1
GO:0090114	COPII-coated vesicle budding	4/399	70/17913	0.0707498	0.191408	0.135621	SERPINA1/AREG/F5/INSIG1	4	M1
GO:0001707	mesoderm formation	4/399	71/17913	0.0737211	0.195636	0.138616	KDM6B/ITGB1/SNAI1/INHBA	4	M1
GO:0031670	cellular response to nutrient	4/399	71/17913	0.0737211	0.195636	0.138616	ATP2B1/PTGS2/CYBB/FYN	4	M1
GO:0033555	multicellular organismal response to stress	4/399	71/17913	0.0737211	0.195636	0.138616	GCH1/THBS1/TSPO/CAPN2	4	M1
GO:0043407	negative regulation of MAP kinase activity	4/399	71/17913	0.0737211	0.195636	0.138616	IL1B/DUSP1/LYN/DUSP6	4	M1
GO:0050772	positive regulation of axonogenesis	4/399	72/17913	0.0767548	0.202358	0.143379	VEGFA/SKIL/NDEL1/ZEB2	4	M1
GO:0050829	defense response to Gram-negative bacterium	4/399	72/17913	0.0767548	0.202358	0.143379	SLC11A1/MPEG1/IL6R/IL6	4	M1
GO:0048332	mesoderm morphogenesis	4/399	73/17913	0.0798503	0.205759	0.145789	KDM6B/ITGB1/SNAI1/INHBA	4	M1
GO:0021675	nerve development	4/399	74/17913	0.083007	0.211684	0.149987	SULF2/CTNNB1/MAFB/TCIRG1	4	M1
GO:0046902	regulation of mitochondrial membrane permeability	4/399	74/17913	0.083007	0.211684	0.149987	PPIF/BID/STAT3/HK2	4	M1
GO:0048194	Golgi vesicle budding	4/399	75/17913	0.0862242	0.215318	0.152562	SERPINA1/AREG/F5/INSIG1	4	M1
GO:0031397	negative regulation of protein ubiquitination	4/399	76/17913	0.0895012	0.221881	0.157212	IVNS1ABP/TNFAIP3/TSPO/FYN	4	M1
GO:0051851	modification by host of symbiont morphology or physiology	4/399	77/17913	0.0928374	0.227362	0.161096	CHD1/ANXA2/ZC3H12A/PTX3	4	M1
GO:0010827	regulation of glucose transmembrane transport	4/399	78/17913	0.096232	0.233107	0.165166	IL1B/PRKAG2/PRKCB/HK2	4	M1
GO:0045913	positive regulation of carbohydrate metabolic process	4/399	78/17913	0.096232	0.233107	0.165166	HIF1A/PFKFB3/NFKB1/RANBP2	4	M1
GO:0051279	regulation of release of sequestered calcium ion into cytosol	4/399	78/17913	0.096232	0.233107	0.165166	CORO1A/TGFB1/LYN/DIAPH1	4	M1
GO:1903008	organelle disassembly	4/399	78/17913	0.096232	0.233107	0.165166	TSPO/HIF1A/PLK3/HK2	4	M1
GO:0003151	outflow tract morphogenesis	4/399	80/17913	0.103193	0.24608	0.174358	VEGFA/CTNNB1/RARA/HIF1A	4	M1
GO:0051702	interaction with symbiont	4/399	81/17913	0.106758	0.249102	0.176499	CHD1/ANXA2/ZC3H12A/PTX3	4	M1
GO:1903533	regulation of protein targeting	4/399	81/17913	0.106758	0.249102	0.176499	ITGB2/LRRK2/ITGAM/FYN	4	M1
GO:0031341	regulation of cell killing	4/399	82/17913	0.110378	0.256338	0.181626	CD55/PTPRC/SERPINB9/ITGAM	4	M1
GO:0045445	myoblast differentiation	4/399	82/17913	0.110378	0.256338	0.181626	BTG1/TGFB1/RIPOR2/DDX5	4	M1
GO:0003073	regulation of systemic arterial blood pressure	4/399	83/17913	0.114052	0.261734	0.18545	SOD2/ATP6AP2/ADM/CES1	4	M1
GO:0090100	positive regulation of transmembrane receptor protein serine/threonine kinase signaling pathway	4/399	84/17913	0.11778	0.269445	0.190913	THBS1/TGFB1/ADAM17/INHBA	4	M1
GO:0090559	regulation of membrane permeability	4/399	84/17913	0.11778	0.269445	0.190913	PPIF/BID/STAT3/HK2	4	M1
GO:0042475	odontogenesis of dentin-containing tooth	4/399	85/17913	0.12156	0.27554	0.195232	CSF3R/CTNNB1/TCIRG1/ADM	4	M1
GO:0034103	regulation of tissue remodeling	4/399	86/17913	0.125391	0.283214	0.200669	TGFB1/ADAM8/TNFAIP3/IL6	4	M1
GO:0060021	roof of mouth development	4/399	87/17913	0.129273	0.28919	0.204903	CSRNP1/SNAI1/INSIG1/INHBA	4	M1
GO:0044264	cellular polysaccharide metabolic process	4/399	88/17913	0.133205	0.297088	0.210499	AOAH/CSGALNACT2/PRKAG2/PHLDA2	4	M1
GO:0070167	regulation of biomineral tissue development	4/399	88/17913	0.133205	0.297088	0.210499	ATP2B1/TGFB1/HIF1A/CEBPB	4	M1
GO:0051289	protein homotetramerization	4/399	89/17913	0.137185	0.304133	0.215491	SOD2/VASP/RXRA/CDA	4	M1
GO:1901655	cellular response to ketone	4/399	91/17913	0.145287	0.316805	0.22447	ATP2B1/TGFB1/MSN/FOXO3	4	M1
GO:0006637	acyl-CoA metabolic process	4/399	93/17913	0.153571	0.331692	0.235018	ACSL1/KYNU/ACOT9/ACSL3	4	M1
GO:0032092	positive regulation of protein binding	4/399	93/17913	0.153571	0.331692	0.235018	RIPK2/SYAP1/LRRK2/ANXA2	4	M1
GO:0035383	thioester metabolic process	4/399	93/17913	0.153571	0.331692	0.235018	ACSL1/KYNU/ACOT9/ACSL3	4	M1
GO:0043255	regulation of carbohydrate biosynthetic process	4/399	94/17913	0.157778	0.338968	0.240173	TGFB1/NFKB1/PLEK/RANBP2	4	M1
GO:0006641	triglyceride metabolic process	4/399	95/17913	0.162028	0.345262	0.244633	GPAT3/ACSL1/GK/INSIG1	4	M1
GO:0007589	body fluid secretion	4/399	95/17913	0.162028	0.345262	0.244633	VEGFA/HIF1A/ANXA2/HK2	4	M1
GO:0019217	regulation of fatty acid metabolic process	4/399	95/17913	0.162028	0.345262	0.244633	PTGS2/IL1B/PRKAG2/INSIG1	4	M1
GO:0018958	phenol-containing compound metabolic process	4/399	96/17913	0.16632	0.352442	0.24972	ITGB2/GCH1/ITGAM/ZEB2	4	M1
GO:0097327	response to antineoplastic agent	4/399	96/17913	0.16632	0.352442	0.24972	CTNNB1/TGFB1/FOXO3/ZC3H12A	4	M1
GO:0002062	chondrocyte differentiation	4/399	97/17913	0.170651	0.35923	0.25453	SULF2/CTNNB1/TGFB1/TRPS1	4	M1
GO:0034766	negative regulation of ion transmembrane transport	4/399	97/17913	0.170651	0.35923	0.25453	PPIF/OXSR1/THBS1/TGFB1	4	M1
GO:0001824	blastocyst development	4/399	99/17913	0.179431	0.371434	0.263177	SKIL/NDEL1/CAPN2/JUNB	4	M1
GO:0002042	cell migration involved in sprouting angiogenesis	4/399	101/17913	0.188358	0.384766	0.272623	PTGS2/VEGFA/THBS1/ITGB1	4	M1
GO:0002504	antigen processing and presentation of peptide or polysaccharide antigen via MHC class II	4/399	101/17913	0.188358	0.384766	0.272623	CTSS/IFI30/THBS1/AP1S2	4	M1
GO:0048675	axon extension	4/399	101/17913	0.188358	0.384766	0.272623	VEGFA/C9orf72/NDEL1/ITGB1	4	M1
GO:0097006	regulation of plasma lipoprotein particle levels	4/399	102/17913	0.192874	0.391328	0.277273	EHD1/ANXA2/APOBR/ACSL3	4	M1
GO:0006939	smooth muscle contraction	4/399	105/17913	0.206621	0.399174	0.282832	ATP2B1/PTGS2/SULF2/PROK2	4	M1
GO:0019730	antimicrobial humoral response	4/399	106/17913	0.211265	0.403392	0.285821	SLC11A1/S100A12/S100A9/S100A8	4	M1
GO:2000278	regulation of DNA biosynthetic process	4/399	106/17913	0.211265	0.403392	0.285821	DUSP1/CTNNB1/CDKN1A/NAF1	4	M1
GO:0071156	regulation of cell cycle arrest	4/399	108/17913	0.22064	0.405267	0.287149	EVI2B/TGFB1/CDKN1A/PLK3	4	M1
GO:0008543	fibroblast growth factor receptor signaling pathway	4/399	109/17913	0.225369	0.412079	0.291976	SULF2/CTNNB1/THBS1/IQGAP1	4	M1
GO:0042303	molting cycle	4/399	109/17913	0.225369	0.412079	0.291976	PTGS2/CTNNB1/SNAI1/INHBA	4	M1
GO:0042633	hair cycle	4/399	109/17913	0.225369	0.412079	0.291976	PTGS2/CTNNB1/SNAI1/INHBA	4	M1
GO:0043618	regulation of transcription from RNA polymerase II promoter in response to stress	4/399	109/17913	0.225369	0.412079	0.291976	VEGFA/BACH1/HIF1A/CEBPB	4	M1
GO:0006805	xenobiotic metabolic process	4/399	110/17913	0.230124	0.417411	0.295753	S100A12/ACSL1/CYP1B1/CES1	4	M1
GO:0032434	regulation of proteasomal ubiquitin-dependent protein catabolic process	4/399	110/17913	0.230124	0.417411	0.295753	LRRK2/PLK3/RYBP/TRIB1	4	M1
GO:0030968	endoplasmic reticulum unfolded protein response	4/399	112/17913	0.239707	0.42104	0.298325	CXCL8/PPP1R15A/PPP1R15B/ATP6V0D1	4	M1
GO:0060419	heart growth	4/399	112/17913	0.239707	0.42104	0.298325	BASP1/AKAP13/JARID2/RXRA	4	M1
GO:0006639	acylglycerol metabolic process	4/399	113/17913	0.244533	0.427764	0.303089	GPAT3/ACSL1/GK/INSIG1	4	M1
GO:0006638	neutral lipid metabolic process	4/399	114/17913	0.24938	0.428036	0.303282	GPAT3/ACSL1/GK/INSIG1	4	M1
GO:0019751	polyol metabolic process	4/399	115/17913	0.254249	0.428081	0.303314	GK/GCH1/PLEK/GK5	4	M1
GO:0043620	regulation of DNA-templated transcription in response to stress	4/399	115/17913	0.254249	0.428081	0.303314	VEGFA/BACH1/HIF1A/CEBPB	4	M1
GO:0070252	actin-mediated cell contraction	4/399	115/17913	0.254249	0.428081	0.303314	FLNA/PDE4B/VIM/TPM4	4	M1
GO:0030449	regulation of complement activation	4/399	116/17913	0.259136	0.432867	0.306705	C5AR1/CD55/CFP/IL1B	4	M1
GO:0031929	TOR signaling	4/399	116/17913	0.259136	0.432867	0.306705	GPAT3/C9orf72/SYAP1/HIF1A	4	M1
GO:0034754	cellular hormone metabolic process	4/399	117/17913	0.264042	0.436692	0.309415	CYP1B1/TSPO/SCPEP1/ADM	4	M1
GO:0061025	membrane fusion	4/399	117/17913	0.264042	0.436692	0.309415	CORO1A/STX11/ANXA2/GCA	4	M1
GO:2000257	regulation of protein activation cascade	4/399	117/17913	0.264042	0.436692	0.309415	C5AR1/CD55/CFP/IL1B	4	M1
GO:0051101	regulation of DNA binding	4/399	120/17913	0.27886	0.447808	0.317291	PLAUR/CTNNB1/NFKBIA/TGFB1	4	M1
GO:0043500	muscle adaptation	4/399	121/17913	0.283829	0.449552	0.318527	TNFRSF1B/IL1B/FOXO3/JARID2	4	M1
GO:0044106	cellular amine metabolic process	4/399	121/17913	0.283829	0.449552	0.318527	ITGB2/KYNU/ITGAM/SAT1	4	M1
GO:0072655	establishment of protein localization to mitochondrion	4/399	121/17913	0.283829	0.449552	0.318527	LRRK2/BID/TSPO/HK2	4	M1
GO:0007006	mitochondrial membrane organization	4/399	122/17913	0.288812	0.451765	0.320095	PPIF/BID/STAT3/HK2	4	M1
GO:0034620	cellular response to unfolded protein	4/399	123/17913	0.293806	0.456857	0.323703	CXCL8/PPP1R15A/PPP1R15B/ATP6V0D1	4	M1
GO:0070585	protein localization to mitochondrion	4/399	125/17913	0.303828	0.461084	0.326698	LRRK2/BID/TSPO/HK2	4	M1
GO:0030010	establishment of cell polarity	4/399	126/17913	0.308853	0.46569	0.329961	MSN/RIPOR2/MYH9/DOCK8	4	M1
GO:0048489	synaptic vesicle transport	4/399	126/17913	0.308853	0.46569	0.329961	CTNNB1/LRRK2/PRKCB/RAB27A	4	M1
GO:0097480	establishment of synaptic vesicle localization	4/399	126/17913	0.308853	0.46569	0.329961	CTNNB1/LRRK2/PRKCB/RAB27A	4	M1
GO:0033865	nucleoside bisphosphate metabolic process	4/399	127/17913	0.313887	0.471723	0.334236	ACSL1/KYNU/ACOT9/ACSL3	4	M1
GO:0033875	ribonucleoside bisphosphate metabolic process	4/399	127/17913	0.313887	0.471723	0.334236	ACSL1/KYNU/ACOT9/ACSL3	4	M1
GO:0034032	purine nucleoside bisphosphate metabolic process	4/399	127/17913	0.313887	0.471723	0.334236	ACSL1/KYNU/ACOT9/ACSL3	4	M1
GO:0009308	amine metabolic process	4/399	128/17913	0.318927	0.472229	0.334595	ITGB2/KYNU/ITGAM/SAT1	4	M1
GO:0071333	cellular response to glucose stimulus	4/399	128/17913	0.318927	0.472229	0.334595	PIM3/FOXO3/HIF1A/MAP4K4	4	M1
GO:0003206	cardiac chamber morphogenesis	4/399	129/17913	0.323975	0.477634	0.338424	TGFB1/RARA/HIF1A/RXRA	4	M1
GO:0030833	regulation of actin filament polymerization	4/399	129/17913	0.323975	0.477634	0.338424	CORO1A/VASP/CAPG/MYADM	4	M1
GO:0016999	antibiotic metabolic process	4/399	130/17913	0.329027	0.483293	0.342434	CYBB/FYN/STAT3/HP	4	M1
GO:0071331	cellular response to hexose stimulus	4/399	130/17913	0.329027	0.483293	0.342434	PIM3/FOXO3/HIF1A/MAP4K4	4	M1
GO:0048813	dendrite morphogenesis	4/399	131/17913	0.334084	0.483872	0.342844	LRRK2/ITGB1/FYN/DOCK10	4	M1
GO:0071326	cellular response to monosaccharide stimulus	4/399	131/17913	0.334084	0.483872	0.342844	PIM3/FOXO3/HIF1A/MAP4K4	4	M1
GO:0060048	cardiac muscle contraction	4/399	132/17913	0.339144	0.490476	0.347523	FLNA/PDE4B/ZC3H12A/MAP2K3	4	M1
GO:0006865	amino acid transport	4/399	134/17913	0.349272	0.494275	0.350215	SLC11A1/SLC43A2/SLC7A7/SLC7A5	4	M1
GO:0031644	regulation of neurological system process	4/399	134/17913	0.349272	0.494275	0.350215	ITGAX/TNFRSF1B/TYMP/LRRK2	4	M1
GO:0035967	cellular response to topologically incorrect protein	4/399	135/17913	0.354338	0.500646	0.35473	CXCL8/PPP1R15A/PPP1R15B/ATP6V0D1	4	M1
GO:0009267	cellular response to starvation	4/399	136/17913	0.359404	0.505223	0.357972	UPP1/LRRK2/CDKN1A/ZC3H12A	4	M1
GO:0008584	male gonad development	4/399	137/17913	0.364469	0.505323	0.358043	FLNA/H3F3A/RARA/INHBA	4	M1
GO:0097479	synaptic vesicle localization	4/399	137/17913	0.364469	0.505323	0.358043	CTNNB1/LRRK2/PRKCB/RAB27A	4	M1
GO:2000058	regulation of ubiquitin-dependent protein catabolic process	4/399	137/17913	0.364469	0.505323	0.358043	LRRK2/PLK3/RYBP/TRIB1	4	M1
GO:0010675	regulation of cellular carbohydrate metabolic process	4/399	138/17913	0.369532	0.511386	0.362339	PLEK/STAT3/RANBP2/PHLDA2	4	M1
GO:0046546	development of primary male sexual characteristics	4/399	138/17913	0.369532	0.511386	0.362339	FLNA/H3F3A/RARA/INHBA	4	M1
GO:0001678	cellular glucose homeostasis	4/399	142/17913	0.389753	0.525177	0.372111	PIM3/FOXO3/HIF1A/MAP4K4	4	M1
GO:0008203	cholesterol metabolic process	4/399	143/17913	0.394795	0.529607	0.375249	RXRA/APOBR/INSIG1/CES1	4	M1
GO:1903670	regulation of sprouting angiogenesis	4/399	143/17913	0.394795	0.529607	0.375249	PTGS2/VEGFA/THBS1/ITGA5	4	M1
GO:0048592	eye morphogenesis	4/399	145/17913	0.404861	0.535916	0.37972	VEGFA/CTNNB1/HIF1A/STAT3	4	M1
GO:0055002	striated muscle cell development	4/399	145/17913	0.404861	0.535916	0.37972	VEGFA/AKAP13/RIPOR2/ITGB1	4	M1
GO:0000910	cytokinesis	4/399	147/17913	0.414895	0.545439	0.386467	PLK3/SNX18/MYH9/TTC19	4	M1
GO:0007051	spindle organization	4/399	147/17913	0.414895	0.545439	0.386467	FLNA/EZR/CCDC69/MYH9	4	M1
GO:1902652	secondary alcohol metabolic process	4/399	147/17913	0.414895	0.545439	0.386467	RXRA/APOBR/INSIG1/CES1	4	M1
GO:0008277	regulation of G protein-coupled receptor signaling pathway	4/399	148/17913	0.419898	0.547024	0.38759	CXCL8/LRRK2/PLEK/ADM	4	M1
GO:0050770	regulation of axonogenesis	4/399	148/17913	0.419898	0.547024	0.38759	VEGFA/SKIL/NDEL1/ZEB2	4	M1
GO:0016202	regulation of striated muscle tissue development	4/399	149/17913	0.424891	0.552396	0.391396	CTNNB1/TGFB1/DDX5/JARID2	4	M1
GO:0035264	multicellular organism growth	4/399	149/17913	0.424891	0.552396	0.391396	H3F3A/EZR/RARA/STAT3	4	M1
GO:0022406	membrane docking	4/399	150/17913	0.429874	0.554257	0.392715	MSN/EZR/PLEK/STXBP2	4	M1
GO:1901861	regulation of muscle tissue development	4/399	152/17913	0.439804	0.561964	0.398176	CTNNB1/TGFB1/DDX5/JARID2	4	M1
GO:0048634	regulation of muscle organ development	4/399	153/17913	0.444751	0.563385	0.399182	CTNNB1/TGFB1/DDX5/JARID2	4	M1
GO:0008361	regulation of cell size	4/399	154/17913	0.449684	0.568662	0.402921	VEGFA/MSN/NDEL1/PLEK	4	M1
GO:0090288	negative regulation of cellular response to growth factor stimulus	4/399	156/17913	0.459508	0.57568	0.407894	SULF2/THBS1/TGFB1/ADAM17	4	M1
GO:0019827	stem cell population maintenance	4/399	158/17913	0.469272	0.581358	0.411917	CTNNB1/FOXO3/PADI4/STAT3	4	M1
GO:0043488	regulation of mRNA stability	4/399	158/17913	0.469272	0.581358	0.411917	SLC11A1/MYD88/VIM/ZC3H12A	4	M1
GO:0099173	postsynapse organization	4/399	158/17913	0.469272	0.581358	0.411917	LILRB2/LRRK2/FYN/DOCK10	4	M1
GO:0098727	maintenance of cell number	4/399	160/17913	0.478971	0.587672	0.416391	CTNNB1/FOXO3/PADI4/STAT3	4	M1
GO:0019935	cyclic-nucleotide-mediated signaling	4/399	166/17913	0.507638	0.610016	0.432223	THBS1/PDE4A/AKAP13/ADM	4	M1
GO:0031345	negative regulation of cell projection organization	4/399	166/17913	0.507638	0.610016	0.432223	LRRK2/VIM/FYN/MAP4K4	4	M1
GO:0006612	protein targeting to membrane	4/399	167/17913	0.512348	0.612976	0.43432	ITGB2/ITGAM/NCF1/FYN	4	M1
GO:0061136	regulation of proteasomal protein catabolic process	4/399	167/17913	0.512348	0.612976	0.43432	LRRK2/PLK3/RYBP/TRIB1	4	M1
GO:0006479	protein methylation	4/399	169/17913	0.521706	0.618936	0.438543	CTNNB1/TET2/JARID2/PRMT9	4	M1
GO:0008213	protein alkylation	4/399	169/17913	0.521706	0.618936	0.438543	CTNNB1/TET2/JARID2/PRMT9	4	M1
GO:0030324	lung development	4/399	169/17913	0.521706	0.618936	0.438543	VEGFA/CTSH/CTNNB1/JMJD6	4	M1
GO:0003205	cardiac chamber development	4/399	170/17913	0.526353	0.620429	0.4396	TGFB1/RARA/HIF1A/RXRA	4	M1
GO:0006941	striated muscle contraction	4/399	170/17913	0.526353	0.620429	0.4396	FLNA/PDE4B/ZC3H12A/MAP2K3	4	M1
GO:0010921	regulation of phosphatase activity	4/399	171/17913	0.530978	0.624225	0.44229	PTPRC/PPP1R15A/PHACTR1/PLEK	4	M1
GO:0050821	protein stabilization	4/399	171/17913	0.530978	0.624225	0.44229	FLNA/CDKN1A/CCNH/ATP1B3	4	M1
GO:0007163	establishment or maintenance of cell polarity	4/399	172/17913	0.53558	0.626323	0.443777	MSN/RIPOR2/MYH9/DOCK8	4	M1
GO:0030323	respiratory tube development	4/399	173/17913	0.540161	0.631329	0.447324	VEGFA/CTSH/CTNNB1/JMJD6	4	M1
GO:0021953	central nervous system neuron differentiation	4/399	177/17913	0.558249	0.644189	0.456436	CTNNB1/NDEL1/ZEB2/INHBA	4	M1
GO:2000045	regulation of G1/S transition of mitotic cell cycle	4/399	177/17913	0.558249	0.644189	0.456436	BID/CDKN1A/PLK3/ADAM17	4	M1
GO:0032271	regulation of protein polymerization	4/399	180/17913	0.571561	0.655636	0.464546	CORO1A/VASP/CAPG/MYADM	4	M1
GO:0006413	translational initiation	4/399	183/17913	0.584647	0.666231	0.472053	PPP1R15A/PPP1R15B/RXRA/AGO2	4	M1
GO:0048839	inner ear development	4/399	185/17913	0.593241	0.674535	0.477937	MAFB/TGFB1/RIPOR2/INSIG1	4	M1
GO:0044242	cellular lipid catabolic process	4/399	189/17913	0.610112	0.687962	0.487451	PNPLA8/CYP1B1/AOAH/CYP4F3	4	M1
GO:0071897	DNA biosynthetic process	4/399	192/17913	0.62248	0.695799	0.493004	DUSP1/CTNNB1/CDKN1A/NAF1	4	M1
GO:0035637	multicellular organismal signaling	4/399	193/17913	0.626547	0.699749	0.495802	ATP2B1/FLNA/TYMP/ATP1B3	4	M1
GO:1902806	regulation of cell cycle G1/S phase transition	4/399	195/17913	0.634598	0.70555	0.499912	BID/CDKN1A/PLK3/ADAM17	4	M1
GO:0017148	negative regulation of translation	4/399	198/17913	0.646463	0.711621	0.504214	RARA/STAT3/ZC3H12A/AGO2	4	M1
GO:1903050	regulation of proteolysis involved in cellular protein catabolic process	4/399	198/17913	0.646463	0.711621	0.504214	LRRK2/PLK3/RYBP/TRIB1	4	M1
GO:0045665	negative regulation of neuron differentiation	4/399	201/17913	0.658071	0.721719	0.511369	LRRK2/FOXO3/VIM/MAP4K4	4	M1
GO:0006006	glucose metabolic process	4/399	204/17913	0.669421	0.730921	0.517889	CREM/RANBP2/PHLDA2/HK2	4	M1
GO:0007411	axon guidance	4/399	210/17913	0.691338	0.748599	0.530414	VEGFA/VASP/EZR/FYN	4	M1
GO:0043583	ear development	4/399	212/17913	0.698411	0.754053	0.534279	MAFB/TGFB1/RIPOR2/INSIG1	4	M1
GO:0097485	neuron projection guidance	4/399	212/17913	0.698411	0.754053	0.534279	VEGFA/VASP/EZR/FYN	4	M1
GO:0090092	regulation of transmembrane receptor protein serine/threonine kinase signaling pathway	4/399	215/17913	0.708801	0.763417	0.540914	THBS1/TGFB1/ADAM17/INHBA	4	M1
GO:0034249	negative regulation of cellular amide metabolic process	4/399	217/17913	0.715582	0.769974	0.54556	RARA/STAT3/ZC3H12A/AGO2	4	M1
GO:0050807	regulation of synapse organization	4/399	218/17913	0.718929	0.771894	0.54692	LILRB2/TLR2/LRRK2/FYN	4	M1
GO:0050803	regulation of synapse structure or activity	4/399	222/17913	0.732027	0.783119	0.554873	LILRB2/TLR2/LRRK2/FYN	4	M1
GO:0031503	protein-containing complex localization	4/399	238/17913	0.779847	0.822987	0.583121	EZR/NUMB/RANBP2/GRASP	4	M1
GO:0006836	neurotransmitter transport	4/399	241/17913	0.788019	0.829641	0.587836	FCER1G/LRRK2/LYN/PRKCB	4	M1
GO:0015980	energy derivation by oxidation of organic compounds	4/399	264/17913	0.842867	0.874456	0.61959	BID/HIF1A/PRKAG2/PHLDA2	4	M1
GO:0034470	ncRNA processing	4/399	293/17913	0.894572	0.916325	0.649256	DDX21/NAF1/AGO2/TRMT6	4	M1
GO:0032984	protein-containing complex disassembly	4/399	298/17913	0.901798	0.922341	0.653518	GABARAPL1/CTNNB1/CAPG/PLEK	4	M1
GO:0022613	ribonucleoprotein complex biogenesis	4/399	381/17913	0.972076	0.977132	0.69234	C9orf72/DDX21/NAF1/AGO2	4	M1
GO:0008380	RNA splicing	4/399	440/17913	0.989388	0.991842	0.702763	AHNAK/IVNS1ABP/DDX5/JMJD6	4	M1
GO:0006397	mRNA processing	4/399	499/17913	0.996153	0.997079	0.706473	DDX5/CCNH/PRMT9/JMJD6	4	M1
GO:0001660	fever generation	3/399	10/17913	0.00117146	0.0110087	0.00780016	PTGS2/IL1B/IL1A	3	M1
GO:0001768	establishment of T cell polarity	3/399	10/17913	0.00117146	0.0110087	0.00780016	RIPOR2/MYH9/DOCK8	3	M1
GO:0045741	positive regulation of epidermal growth factor-activated receptor activity	3/399	10/17913	0.00117146	0.0110087	0.00780016	EREG/NCF1/ADAM17	3	M1
GO:0070391	response to lipoteichoic acid	3/399	10/17913	0.00117146	0.0110087	0.00780016	RIPK2/TLR2/CD14	3	M1
GO:0071223	cellular response to lipoteichoic acid	3/399	10/17913	0.00117146	0.0110087	0.00780016	RIPK2/TLR2/CD14	3	M1
GO:2000271	positive regulation of fibroblast apoptotic process	3/399	10/17913	0.00117146	0.0110087	0.00780016	BTG1/STK17B/BID	3	M1
GO:0001767	establishment of lymphocyte polarity	3/399	11/17913	0.00158425	0.0133878	0.00948584	RIPOR2/MYH9/DOCK8	3	M1
GO:0002604	regulation of dendritic cell antigen processing and presentation	3/399	11/17913	0.00158425	0.0133878	0.00948584	SLC11A1/THBS1/FGL2	3	M1
GO:0008655	pyrimidine-containing compound salvage	3/399	11/17913	0.00158425	0.0133878	0.00948584	TYMP/UPP1/CDA	3	M1
GO:0043097	pyrimidine nucleoside salvage	3/399	11/17913	0.00158425	0.0133878	0.00948584	TYMP/UPP1/CDA	3	M1
GO:0045628	regulation of T-helper 2 cell differentiation	3/399	11/17913	0.00158425	0.0133878	0.00948584	NLRP3/RARA/CD86	3	M1
GO:0046886	positive regulation of hormone biosynthetic process	3/399	11/17913	0.00158425	0.0133878	0.00948584	IL1B/HIF1A/ADM	3	M1
GO:0048875	chemical homeostasis within a tissue	3/399	11/17913	0.00158425	0.0133878	0.00948584	VEGFA/CTSH/LPCAT1	3	M1
GO:0072672	neutrophil extravasation	3/399	11/17913	0.00158425	0.0133878	0.00948584	JAML/ADAM8/RIPOR2	3	M1
GO:1904424	regulation of GTP binding	3/399	11/17913	0.00158425	0.0133878	0.00948584	C9orf72/RIPOR2/CCPG1	3	M1
GO:2000318	positive regulation of T-helper 17 type immune response	3/399	11/17913	0.00158425	0.0133878	0.00948584	NLRP3/NFKBIZ/MALT1	3	M1
GO:0042368	vitamin D biosynthetic process	3/399	12/17913	0.00207761	0.0164032	0.0116223	IL1B/NFKB1/SNAI1	3	M1
GO:0045410	positive regulation of interleukin-6 biosynthetic process	3/399	12/17913	0.00207761	0.0164032	0.0116223	IL1B/EREG/STAT3	3	M1
GO:0051238	sequestering of metal ion	3/399	12/17913	0.00207761	0.0164032	0.0116223	S100A9/FTH1/S100A8	3	M1
GO:0051549	positive regulation of keratinocyte migration	3/399	12/17913	0.00207761	0.0164032	0.0116223	HBEGF/IQSEC1/MAP4K4	3	M1
GO:0071073	positive regulation of phospholipid biosynthetic process	3/399	12/17913	0.00207761	0.0164032	0.0116223	CAPN2/ACSL3/FPR2	3	M1
GO:0030656	regulation of vitamin metabolic process	3/399	13/17913	0.00265655	0.0193263	0.0136935	IL1B/NFKB1/SNAI1	3	M1
GO:0031665	negative regulation of lipopolysaccharide-mediated signaling pathway	3/399	13/17913	0.00265655	0.0193263	0.0136935	CARD16/TNFAIP3/TRIB1	3	M1
GO:0048266	behavioral response to pain	3/399	13/17913	0.00265655	0.0193263	0.0136935	THBS1/TSPO/CAPN2	3	M1
GO:0060712	spongiotrophoblast layer development	3/399	13/17913	0.00265655	0.0193263	0.0136935	SOCS3/PHLDA2/ADM	3	M1
GO:0070431	nucleotide-binding oligomerization domain containing 2 signaling pathway	3/399	13/17913	0.00265655	0.0193263	0.0136935	RIPK2/NFKBIA/TNFAIP3	3	M1
GO:2001044	regulation of integrin-mediated signaling pathway	3/399	13/17913	0.00265655	0.0193263	0.0136935	TIMP1/FLNA/BST1	3	M1
GO:0006910	phagocytosis, recognition	3/399	14/17913	0.00332561	0.0225684	0.0159907	FCN1/CLEC7A/JMJD6	3	M1
GO:0030213	hyaluronan biosynthetic process	3/399	14/17913	0.00332561	0.0225684	0.0159907	IL1B/TGFB1/NFKB1	3	M1
GO:0045064	T-helper 2 cell differentiation	3/399	14/17913	0.00332561	0.0225684	0.0159907	NLRP3/RARA/CD86	3	M1
GO:0045591	positive regulation of regulatory T cell differentiation	3/399	14/17913	0.00332561	0.0225684	0.0159907	LILRB2/TGFB1/VSIR	3	M1
GO:0046133	pyrimidine ribonucleoside catabolic process	3/399	14/17913	0.00332561	0.0225684	0.0159907	UPP1/APOBEC3A/CDA	3	M1
GO:0051547	regulation of keratinocyte migration	3/399	14/17913	0.00332561	0.0225684	0.0159907	HBEGF/IQSEC1/MAP4K4	3	M1
GO:0051770	positive regulation of nitric-oxide synthase biosynthetic process	3/399	14/17913	0.00332561	0.0225684	0.0159907	NAMPT/TLR2/LRRK2	3	M1
GO:0002467	germinal center formation	3/399	15/17913	0.00408891	0.0263028	0.0186366	TNFAIP3/NFKB2/ADAM17	3	M1
GO:0030852	regulation of granulocyte differentiation	3/399	15/17913	0.00408891	0.0263028	0.0186366	EVI2B/RARA/TRIB1	3	M1
GO:0032352	positive regulation of hormone metabolic process	3/399	15/17913	0.00408891	0.0263028	0.0186366	IL1B/HIF1A/ADM	3	M1
GO:0034356	NAD biosynthesis via nicotinamide riboside salvage pathway	3/399	15/17913	0.00408891	0.0263028	0.0186366	NAMPT/PTGS2/PNP	3	M1
GO:0042362	fat-soluble vitamin biosynthetic process	3/399	15/17913	0.00408891	0.0263028	0.0186366	IL1B/NFKB1/SNAI1	3	M1
GO:0050651	dermatan sulfate proteoglycan biosynthetic process	3/399	15/17913	0.00408891	0.0263028	0.0186366	VCAN/DSE/CSGALNACT2	3	M1
GO:0051044	positive regulation of membrane protein ectodomain proteolysis	3/399	15/17913	0.00408891	0.0263028	0.0186366	TNFRSF1B/IL1B/ADAM8	3	M1
GO:0070262	peptidyl-serine dephosphorylation	3/399	15/17913	0.00408891	0.0263028	0.0186366	DUSP1/PPP1R15A/PPP1R15B	3	M1
GO:0001780	neutrophil homeostasis	3/399	16/17913	0.00495016	0.0301258	0.0213454	PDE4B/HCAR2/IL6	3	M1
GO:0019372	lipoxygenase pathway	3/399	16/17913	0.00495016	0.0301258	0.0213454	PTGS2/ALOX5/ALOX5AP	3	M1
GO:0031649	heat generation	3/399	16/17913	0.00495016	0.0301258	0.0213454	PTGS2/IL1B/IL1A	3	M1
GO:0032695	negative regulation of interleukin-12 production	3/399	16/17913	0.00495016	0.0301258	0.0213454	LILRA5/THBS1/NFKB1	3	M1
GO:0033631	cell-cell adhesion mediated by integrin	3/399	16/17913	0.00495016	0.0301258	0.0213454	ITGB1/FERMT3/ITGA5	3	M1
GO:0043174	nucleoside salvage	3/399	16/17913	0.00495016	0.0301258	0.0213454	TYMP/UPP1/CDA	3	M1
GO:0050655	dermatan sulfate proteoglycan metabolic process	3/399	16/17913	0.00495016	0.0301258	0.0213454	VCAN/DSE/CSGALNACT2	3	M1
GO:0060965	negative regulation of gene silencing by miRNA	3/399	16/17913	0.00495016	0.0301258	0.0213454	NEAT1/TGFB1/ZC3H12A	3	M1
GO:1903019	negative regulation of glycoprotein metabolic process	3/399	16/17913	0.00495016	0.0301258	0.0213454	HBEGF/PTX3/AGO2	3	M1
GO:0035313	wound healing, spreading of epidermal cells	3/399	17/17913	0.00591266	0.0346103	0.0245229	HBEGF/ADAM17/ITGA5	3	M1
GO:0050665	hydrogen peroxide biosynthetic process	3/399	17/17913	0.00591266	0.0346103	0.0245229	CYBB/FYN/STAT3	3	M1
GO:1903980	positive regulation of microglial cell activation	3/399	17/17913	0.00591266	0.0346103	0.0245229	ITGB2/LRRK2/ITGAM	3	M1
GO:2000811	negative regulation of anoikis	3/399	17/17913	0.00591266	0.0346103	0.0245229	MCL1/ITGB1/ITGA5	3	M1
GO:0031065	positive regulation of histone deacetylation	3/399	18/17913	0.00697936	0.0388763	0.0275455	VEGFA/TGFB1/LRRK2	3	M1
GO:0031293	membrane protein intracellular domain proteolysis	3/399	18/17913	0.00697936	0.0388763	0.0275455	TGFB1/NFKB1/ADAM17	3	M1
GO:0046641	positive regulation of alpha-beta T cell proliferation	3/399	18/17913	0.00697936	0.0388763	0.0275455	CD55/PTPRC/RIPK2	3	M1
GO:0060749	mammary gland alveolus development	3/399	18/17913	0.00697936	0.0388763	0.0275455	VEGFA/HIF1A/AREG	3	M1
GO:0061377	mammary gland lobule development	3/399	18/17913	0.00697936	0.0388763	0.0275455	VEGFA/HIF1A/AREG	3	M1
GO:0071800	podosome assembly	3/399	18/17913	0.00697936	0.0388763	0.0275455	MSN/BIN2/LCP1	3	M1
GO:0072574	hepatocyte proliferation	3/399	18/17913	0.00697936	0.0388763	0.0275455	SULF2/TNFAIP3/CEBPB	3	M1
GO:0072575	epithelial cell proliferation involved in liver morphogenesis	3/399	18/17913	0.00697936	0.0388763	0.0275455	SULF2/TNFAIP3/CEBPB	3	M1
GO:0002544	chronic inflammatory response	3/399	19/17913	0.00815284	0.0428868	0.0303872	THBS1/TNFAIP3/S100A8	3	M1
GO:0002827	positive regulation of T-helper 1 type immune response	3/399	19/17913	0.00815284	0.0428868	0.0303872	SLC11A1/IL1B/RIPK2	3	M1
GO:0019370	leukotriene biosynthetic process	3/399	19/17913	0.00815284	0.0428868	0.0303872	ALOX5/LTA4H/ALOX5AP	3	M1
GO:0046597	negative regulation of viral entry into host cell	3/399	19/17913	0.00815284	0.0428868	0.0303872	FCN1/IFITM2/PTX3	3	M1
GO:0051412	response to corticosterone	3/399	19/17913	0.00815284	0.0428868	0.0303872	ATP2B1/FOXO3/CDKN1A	3	M1
GO:0051546	keratinocyte migration	3/399	19/17913	0.00815284	0.0428868	0.0303872	HBEGF/IQSEC1/MAP4K4	3	M1
GO:0051767	nitric-oxide synthase biosynthetic process	3/399	19/17913	0.00815284	0.0428868	0.0303872	NAMPT/TLR2/LRRK2	3	M1
GO:0051769	regulation of nitric-oxide synthase biosynthetic process	3/399	19/17913	0.00815284	0.0428868	0.0303872	NAMPT/TLR2/LRRK2	3	M1
GO:0060149	negative regulation of posttranscriptional gene silencing	3/399	19/17913	0.00815284	0.0428868	0.0303872	NEAT1/TGFB1/ZC3H12A	3	M1
GO:0060967	negative regulation of gene silencing by RNA	3/399	19/17913	0.00815284	0.0428868	0.0303872	NEAT1/TGFB1/ZC3H12A	3	M1
GO:0072576	liver morphogenesis	3/399	19/17913	0.00815284	0.0428868	0.0303872	SULF2/TNFAIP3/CEBPB	3	M1
GO:1903798	regulation of production of miRNAs involved in gene silencing by miRNA	3/399	19/17913	0.00815284	0.0428868	0.0303872	TGFB1/DDX5/ZC3H12A	3	M1
GO:0002052	positive regulation of neuroblast proliferation	3/399	20/17913	0.00943535	0.0477678	0.0338456	VEGFA/CTNNB1/HIF1A	3	M1
GO:0002374	cytokine secretion involved in immune response	3/399	20/17913	0.00943535	0.0477678	0.0338456	TNFRSF1B/NLRP3/TLR2	3	M1
GO:0010042	response to manganese ion	3/399	20/17913	0.00943535	0.0477678	0.0338456	PTGS2/LRRK2/TSPO	3	M1
GO:0071636	positive regulation of transforming growth factor beta production	3/399	20/17913	0.00943535	0.0477678	0.0338456	PTGS2/THBS1/ATP6AP2	3	M1
GO:0010310	regulation of hydrogen peroxide metabolic process	3/399	21/17913	0.0108288	0.0528366	0.037437	FYN/STAT3/HP	3	M1
GO:0010884	positive regulation of lipid storage	3/399	21/17913	0.0108288	0.0528366	0.037437	EHD1/NFKB1/ZC3H12A	3	M1
GO:0017000	antibiotic biosynthetic process	3/399	21/17913	0.0108288	0.0528366	0.037437	CYBB/FYN/STAT3	3	M1
GO:0036120	cellular response to platelet-derived growth factor stimulus	3/399	21/17913	0.0108288	0.0528366	0.037437	SYAP1/FYN/IQGAP1	3	M1
GO:0036499	PERK-mediated unfolded protein response	3/399	21/17913	0.0108288	0.0528366	0.037437	CXCL8/PPP1R15A/PPP1R15B	3	M1
GO:0070920	regulation of production of small RNA involved in gene silencing by RNA	3/399	21/17913	0.0108288	0.0528366	0.037437	TGFB1/DDX5/ZC3H12A	3	M1
GO:2000269	regulation of fibroblast apoptotic process	3/399	21/17913	0.0108288	0.0528366	0.037437	BTG1/STK17B/BID	3	M1
GO:0007398	ectoderm development	3/399	22/17913	0.0123349	0.0581428	0.0411966	ETS2/CTNNB1/ITGAM	3	M1
GO:0009110	vitamin biosynthetic process	3/399	22/17913	0.0123349	0.0581428	0.0411966	IL1B/NFKB1/SNAI1	3	M1
GO:0032656	regulation of interleukin-13 production	3/399	22/17913	0.0123349	0.0581428	0.0411966	NLRP3/LILRA5/RARA	3	M1
GO:0036119	response to platelet-derived growth factor	3/399	22/17913	0.0123349	0.0581428	0.0411966	SYAP1/FYN/IQGAP1	3	M1
GO:0042359	vitamin D metabolic process	3/399	22/17913	0.0123349	0.0581428	0.0411966	IL1B/NFKB1/SNAI1	3	M1
GO:0045649	regulation of macrophage differentiation	3/399	22/17913	0.0123349	0.0581428	0.0411966	TGFB1/TRIB1/INHBA	3	M1
GO:0050927	positive regulation of positive chemotaxis	3/399	22/17913	0.0123349	0.0581428	0.0411966	VEGFA/CXCL8/F3	3	M1
GO:0051195	negative regulation of cofactor metabolic process	3/399	22/17913	0.0123349	0.0581428	0.0411966	FYN/STAT3/HP	3	M1
GO:0061213	positive regulation of mesonephros development	3/399	22/17913	0.0123349	0.0581428	0.0411966	VEGFA/TGFB1/BASP1	3	M1
GO:0090312	positive regulation of protein deacetylation	3/399	22/17913	0.0123349	0.0581428	0.0411966	VEGFA/TGFB1/LRRK2	3	M1
GO:0032703	negative regulation of interleukin-2 production	3/399	23/17913	0.0139549	0.0639485	0.0453103	PTPRC/TNFAIP3/EZR	3	M1
GO:0050857	positive regulation of antigen receptor-mediated signaling pathway	3/399	23/17913	0.0139549	0.0639485	0.0453103	PTPRC/NFAM1/PRKCB	3	M1
GO:0050926	regulation of positive chemotaxis	3/399	23/17913	0.0139549	0.0639485	0.0453103	VEGFA/CXCL8/F3	3	M1
GO:0071404	cellular response to low-density lipoprotein particle stimulus	3/399	23/17913	0.0139549	0.0639485	0.0453103	ITGB2/FCER1G/ITGB1	3	M1
GO:0036003	positive regulation of transcription from RNA polymerase II promoter in response to stress	3/399	24/17913	0.0156899	0.0703042	0.0498135	VEGFA/HIF1A/CEBPB	3	M1
GO:0044346	fibroblast apoptotic process	3/399	24/17913	0.0156899	0.0703042	0.0498135	BTG1/STK17B/BID	3	M1
GO:0090023	positive regulation of neutrophil chemotaxis	3/399	24/17913	0.0156899	0.0703042	0.0498135	C5AR1/CXCL8/RIPOR2	3	M1
GO:1903649	regulation of cytoplasmic transport	3/399	24/17913	0.0156899	0.0703042	0.0498135	MSN/LRRK2/EZR	3	M1
GO:2000209	regulation of anoikis	3/399	24/17913	0.0156899	0.0703042	0.0498135	MCL1/ITGB1/ITGA5	3	M1
GO:0002335	mature B cell differentiation	3/399	25/17913	0.0175408	0.0762903	0.054055	POU2F2/MALT1/DOCK10	3	M1
GO:0007176	regulation of epidermal growth factor-activated receptor activity	3/399	25/17913	0.0175408	0.0762903	0.054055	EREG/NCF1/ADAM17	3	M1
GO:0015991	ATP hydrolysis coupled proton transport	3/399	25/17913	0.0175408	0.0762903	0.054055	TCIRG1/ATP6V0D1/ATP6V1B2	3	M1
GO:0032616	interleukin-13 production	3/399	25/17913	0.0175408	0.0762903	0.054055	NLRP3/LILRA5/RARA	3	M1
GO:0042759	long-chain fatty acid biosynthetic process	3/399	25/17913	0.0175408	0.0762903	0.054055	PTGS2/ALOX5/LTA4H	3	M1
GO:0060330	regulation of response to interferon-gamma	3/399	25/17913	0.0175408	0.0762903	0.054055	SOCS3/IFNGR2/IFNGR1	3	M1
GO:0060334	regulation of interferon-gamma-mediated signaling pathway	3/399	25/17913	0.0175408	0.0762903	0.054055	SOCS3/IFNGR2/IFNGR1	3	M1
GO:0070076	histone lysine demethylation	3/399	25/17913	0.0175408	0.0762903	0.054055	KDM6B/JARID2/KDM7A	3	M1
GO:0090025	regulation of monocyte chemotaxis	3/399	25/17913	0.0175408	0.0762903	0.054055	DUSP1/LYN/FPR2	3	M1
GO:0097066	response to thyroid hormone	3/399	25/17913	0.0175408	0.0762903	0.054055	CTSS/CTSH/ANXA2	3	M1
GO:1905809	negative regulation of synapse organization	3/399	25/17913	0.0175408	0.0762903	0.054055	LILRB2/TLR2/FYN	3	M1
GO:0002691	regulation of cellular extravasation	3/399	26/17913	0.019508	0.0811357	0.0574882	ADAM8/RIPOR2/BST1	3	M1
GO:0002825	regulation of T-helper 1 type immune response	3/399	26/17913	0.019508	0.0811357	0.0574882	SLC11A1/IL1B/RIPK2	3	M1
GO:0007263	nitric oxide mediated signal transduction	3/399	26/17913	0.019508	0.0811357	0.0574882	FPR1/VEGFA/THBS1	3	M1
GO:0015988	energy coupled proton transmembrane transport, against electrochemical gradient	3/399	26/17913	0.019508	0.0811357	0.0574882	TCIRG1/ATP6V0D1/ATP6V1B2	3	M1
GO:0030201	heparan sulfate proteoglycan metabolic process	3/399	26/17913	0.019508	0.0811357	0.0574882	SULF2/CTNNB1/DSE	3	M1
GO:0030206	chondroitin sulfate biosynthetic process	3/399	26/17913	0.019508	0.0811357	0.0574882	VCAN/DSE/CSGALNACT2	3	M1
GO:0060969	negative regulation of gene silencing	3/399	26/17913	0.019508	0.0811357	0.0574882	NEAT1/TGFB1/ZC3H12A	3	M1
GO:0061217	regulation of mesonephros development	3/399	26/17913	0.019508	0.0811357	0.0574882	VEGFA/TGFB1/BASP1	3	M1
GO:0071624	positive regulation of granulocyte chemotaxis	3/399	26/17913	0.019508	0.0811357	0.0574882	C5AR1/CXCL8/RIPOR2	3	M1
GO:1902175	regulation of oxidative stress-induced intrinsic apoptotic signaling pathway	3/399	26/17913	0.019508	0.0811357	0.0574882	SOD2/MCL1/HIF1A	3	M1
GO:1903203	regulation of oxidative stress-induced neuron death	3/399	26/17913	0.019508	0.0811357	0.0574882	MCL1/CTNNB1/HIF1A	3	M1
GO:1903579	negative regulation of ATP metabolic process	3/399	26/17913	0.019508	0.0811357	0.0574882	PPIF/TSPO/STAT3	3	M1
GO:0010714	positive regulation of collagen metabolic process	3/399	27/17913	0.021592	0.0872515	0.0618214	TGFB1/VSIR/VIM	3	M1
GO:0035456	response to interferon-beta	3/399	27/17913	0.021592	0.0872515	0.0618214	IFITM2/MNDA/CAPN2	3	M1
GO:0036151	phosphatidylcholine acyl-chain remodeling	3/399	27/17913	0.021592	0.0872515	0.0618214	PLBD1/PNPLA8/LPCAT1	3	M1
GO:0036475	neuron death in response to oxidative stress	3/399	27/17913	0.021592	0.0872515	0.0618214	MCL1/CTNNB1/HIF1A	3	M1
GO:0045671	negative regulation of osteoclast differentiation	3/399	27/17913	0.021592	0.0872515	0.0618214	LILRB3/CTNNB1/MAFB	3	M1
GO:0099131	ATP hydrolysis coupled ion transmembrane transport	3/399	27/17913	0.021592	0.0872515	0.0618214	TCIRG1/ATP6V0D1/ATP6V1B2	3	M1
GO:0001516	prostaglandin biosynthetic process	3/399	28/17913	0.0237929	0.0920338	0.0652099	PTGS2/IL1B/PNPLA8	3	M1
GO:0010894	negative regulation of steroid biosynthetic process	3/399	28/17913	0.0237929	0.0920338	0.0652099	NFKB1/SNAI1/INSIG1	3	M1
GO:0010954	positive regulation of protein processing	3/399	28/17913	0.0237929	0.0920338	0.0652099	IL1B/ADAM8/MYH9	3	M1
GO:0031063	regulation of histone deacetylation	3/399	28/17913	0.0237929	0.0920338	0.0652099	VEGFA/TGFB1/LRRK2	3	M1
GO:0032770	positive regulation of monooxygenase activity	3/399	28/17913	0.0237929	0.0920338	0.0652099	IL1B/GCH1/HIF1A	3	M1
GO:0046457	prostanoid biosynthetic process	3/399	28/17913	0.0237929	0.0920338	0.0652099	PTGS2/IL1B/PNPLA8	3	M1
GO:0048384	retinoic acid receptor signaling pathway	3/399	28/17913	0.0237929	0.0920338	0.0652099	RARA/CREM/RXRA	3	M1
GO:0050855	regulation of B cell receptor signaling pathway	3/399	28/17913	0.0237929	0.0920338	0.0652099	LYN/NFAM1/PRKCB	3	M1
GO:0090200	positive regulation of release of cytochrome c from mitochondria	3/399	28/17913	0.0237929	0.0920338	0.0652099	PLAUR/PPIF/BID	3	M1
GO:0090383	phagosome acidification	3/399	28/17913	0.0237929	0.0920338	0.0652099	TCIRG1/ATP6V0D1/ATP6V1B2	3	M1
GO:0090662	ATP hydrolysis coupled transmembrane transport	3/399	28/17913	0.0237929	0.0920338	0.0652099	TCIRG1/ATP6V0D1/ATP6V1B2	3	M1
GO:1900543	negative regulation of purine nucleotide metabolic process	3/399	28/17913	0.0237929	0.0920338	0.0652099	PPIF/TSPO/STAT3	3	M1
GO:2000108	positive regulation of leukocyte apoptotic process	3/399	28/17913	0.0237929	0.0920338	0.0652099	ADAM8/LYN/HCAR2	3	M1
GO:0006929	substrate-dependent cell migration	3/399	29/17913	0.0261107	0.0981911	0.0695727	PTPRC/FMNL1/ADAM8	3	M1
GO:0010800	positive regulation of peptidyl-threonine phosphorylation	3/399	29/17913	0.0261107	0.0981911	0.0695727	RIPK2/TGFB1/PRKAG2	3	M1
GO:0046134	pyrimidine nucleoside biosynthetic process	3/399	29/17913	0.0261107	0.0981911	0.0695727	TYMP/UPP1/CDA	3	M1
GO:0046627	negative regulation of insulin receptor signaling pathway	3/399	29/17913	0.0261107	0.0981911	0.0695727	IL1B/PTPRE/PRKCB	3	M1
GO:0050650	chondroitin sulfate proteoglycan biosynthetic process	3/399	29/17913	0.0261107	0.0981911	0.0695727	VCAN/DSE/CSGALNACT2	3	M1
GO:0070528	protein kinase C signaling	3/399	29/17913	0.0261107	0.0981911	0.0695727	VEGFA/PLEK/MYADM	3	M1
GO:1904467	regulation of tumor necrosis factor secretion	3/399	29/17913	0.0261107	0.0981911	0.0695727	LILRA5/LRRK2/ZC3H12A	3	M1
GO:2000778	positive regulation of interleukin-6 secretion	3/399	29/17913	0.0261107	0.0981911	0.0695727	IL1B/LILRA5/SELENOK	3	M1
GO:0010543	regulation of platelet activation	3/399	30/17913	0.028545	0.103747	0.0735091	LYN/PLEK/THBD	3	M1
GO:0010586	miRNA metabolic process	3/399	30/17913	0.028545	0.103747	0.0735091	NFKB1/ZC3H12A/AGO2	3	M1
GO:0045939	negative regulation of steroid metabolic process	3/399	30/17913	0.028545	0.103747	0.0735091	NFKB1/SNAI1/INSIG1	3	M1
GO:0046596	regulation of viral entry into host cell	3/399	30/17913	0.028545	0.103747	0.0735091	FCN1/IFITM2/PTX3	3	M1
GO:0061082	myeloid leukocyte cytokine production	3/399	30/17913	0.028545	0.103747	0.0735091	FCER1G/TGFB1/DDX21	3	M1
GO:0090314	positive regulation of protein targeting to membrane	3/399	30/17913	0.028545	0.103747	0.0735091	ITGB2/ITGAM/FYN	3	M1
GO:1902895	positive regulation of pri-miRNA transcription by RNA polymerase II	3/399	30/17913	0.028545	0.103747	0.0735091	TGFB1/HIF1A/STAT3	3	M1
GO:1903319	positive regulation of protein maturation	3/399	30/17913	0.028545	0.103747	0.0735091	IL1B/ADAM8/MYH9	3	M1
GO:0030866	cortical actin cytoskeleton organization	3/399	31/17913	0.0310954	0.111108	0.0787251	FMNL1/EZR/PLEK	3	M1
GO:0043330	response to exogenous dsRNA	3/399	31/17913	0.0310954	0.111108	0.0787251	RIPK2/NFKBIA/DDX21	3	M1
GO:0061311	cell surface receptor signaling pathway involved in heart development	3/399	31/17913	0.0310954	0.111108	0.0787251	CTNNB1/TGFB1/SNAI1	3	M1
GO:1900077	negative regulation of cellular response to insulin stimulus	3/399	31/17913	0.0310954	0.111108	0.0787251	IL1B/PTPRE/PRKCB	3	M1
GO:1902230	negative regulation of intrinsic apoptotic signaling pathway in response to DNA damage	3/399	31/17913	0.0310954	0.111108	0.0787251	CD44/BID/SNAI1	3	M1
GO:0003176	aortic valve development	3/399	32/17913	0.0337613	0.115989	0.0821834	TNFRSF1B/TGFB1/SNAI1	3	M1
GO:0030851	granulocyte differentiation	3/399	32/17913	0.0337613	0.115989	0.0821834	EVI2B/RARA/TRIB1	3	M1
GO:0040036	regulation of fibroblast growth factor receptor signaling pathway	3/399	32/17913	0.0337613	0.115989	0.0821834	SULF2/CTNNB1/THBS1	3	M1
GO:0043368	positive T cell selection	3/399	32/17913	0.0337613	0.115989	0.0821834	PTPRC/STAT3/IL6	3	M1
GO:0046685	response to arsenic-containing substance	3/399	32/17913	0.0337613	0.115989	0.0821834	PPIF/CDKN1A/ZC3H12A	3	M1
GO:0070232	regulation of T cell apoptotic process	3/399	32/17913	0.0337613	0.115989	0.0821834	ADAM8/HIF1A/DOCK8	3	M1
GO:0097421	liver regeneration	3/399	32/17913	0.0337613	0.115989	0.0821834	SULF2/TGFB1/CEBPB	3	M1
GO:1990774	tumor necrosis factor secretion	3/399	32/17913	0.0337613	0.115989	0.0821834	LILRA5/LRRK2/ZC3H12A	3	M1
GO:2001171	positive regulation of ATP biosynthetic process	3/399	32/17913	0.0337613	0.115989	0.0821834	HIF1A/PFKFB3/STAT3	3	M1
GO:0001913	T cell mediated cytotoxicity	3/399	33/17913	0.036542	0.123333	0.0873864	PTPRC/CTSH/RAB27A	3	M1
GO:0010922	positive regulation of phosphatase activity	3/399	33/17913	0.036542	0.123333	0.0873864	PTPRC/PPP1R15A/PLEK	3	M1
GO:0036314	response to sterol	3/399	33/17913	0.036542	0.123333	0.0873864	TGFB1/INSIG1/INHBA	3	M1
GO:0043516	regulation of DNA damage response, signal transduction by p53 class mediator	3/399	33/17913	0.036542	0.123333	0.0873864	CD44/DDX5/SNAI1	3	M1
GO:0045589	regulation of regulatory T cell differentiation	3/399	33/17913	0.036542	0.123333	0.0873864	LILRB2/TGFB1/VSIR	3	M1
GO:0097242	amyloid-beta clearance	3/399	33/17913	0.036542	0.123333	0.0873864	C5AR1/ITGB2/ITGAM	3	M1
GO:1901223	negative regulation of NIK/NF-kappaB signaling	3/399	33/17913	0.036542	0.123333	0.0873864	NLRP3/LITAF/ZC3H12A	3	M1
GO:0043276	anoikis	3/399	34/17913	0.0394365	0.130543	0.0924954	MCL1/ITGB1/ITGA5	3	M1
GO:0048536	spleen development	3/399	34/17913	0.0394365	0.130543	0.0924954	NFKB2/JARID2/ADAM17	3	M1
GO:0072595	maintenance of protein localization in organelle	3/399	34/17913	0.0394365	0.130543	0.0924954	TSPO/HK2/INSIG1	3	M1
GO:0001893	maternal placenta development	3/399	35/17913	0.0424438	0.13724	0.0972408	PTGS2/RXRA/JUNB	3	M1
GO:0030865	cortical cytoskeleton organization	3/399	35/17913	0.0424438	0.13724	0.0972408	FMNL1/EZR/PLEK	3	M1
GO:0045066	regulatory T cell differentiation	3/399	35/17913	0.0424438	0.13724	0.0972408	LILRB2/TGFB1/VSIR	3	M1
GO:0046131	pyrimidine ribonucleoside metabolic process	3/399	35/17913	0.0424438	0.13724	0.0972408	UPP1/APOBEC3A/CDA	3	M1
GO:0048333	mesodermal cell differentiation	3/399	35/17913	0.0424438	0.13724	0.0972408	KDM6B/ITGB1/INHBA	3	M1
GO:0051354	negative regulation of oxidoreductase activity	3/399	35/17913	0.0424438	0.13724	0.0972408	LRRK2/NFKB1/HP	3	M1
GO:0060323	head morphogenesis	3/399	35/17913	0.0424438	0.13724	0.0972408	TGFB1/CSRNP1/ATP6AP2	3	M1
GO:0071542	dopaminergic neuron differentiation	3/399	35/17913	0.0424438	0.13724	0.0972408	VEGFA/CTNNB1/HIF1A	3	M1
GO:0002251	organ or tissue specific immune response	3/399	36/17913	0.0455627	0.143432	0.101628	IL6R/FFAR2/IL6	3	M1
GO:0002755	MyD88-dependent toll-like receptor signaling pathway	3/399	36/17913	0.0455627	0.143432	0.101628	MYD88/TLR2/CD14	3	M1
GO:0015682	ferric iron transport	3/399	36/17913	0.0455627	0.143432	0.101628	TCIRG1/ATP6V0D1/ATP6V1B2	3	M1
GO:0033572	transferrin transport	3/399	36/17913	0.0455627	0.143432	0.101628	TCIRG1/ATP6V0D1/ATP6V1B2	3	M1
GO:0042417	dopamine metabolic process	3/399	36/17913	0.0455627	0.143432	0.101628	ITGB2/GCH1/ITGAM	3	M1
GO:0045776	negative regulation of blood pressure	3/399	36/17913	0.0455627	0.143432	0.101628	SOD2/GCH1/SCPEP1	3	M1
GO:0072512	trivalent inorganic cation transport	3/399	36/17913	0.0455627	0.143432	0.101628	TCIRG1/ATP6V0D1/ATP6V1B2	3	M1
GO:0090313	regulation of protein targeting to membrane	3/399	36/17913	0.0455627	0.143432	0.101628	ITGB2/ITGAM/FYN	3	M1
GO:0002714	positive regulation of B cell mediated immunity	3/399	37/17913	0.0487919	0.149469	0.105905	PTPRC/FCER1G/TGFB1	3	M1
GO:0002891	positive regulation of immunoglobulin mediated immune response	3/399	37/17913	0.0487919	0.149469	0.105905	PTPRC/FCER1G/TGFB1	3	M1
GO:0030574	collagen catabolic process	3/399	37/17913	0.0487919	0.149469	0.105905	CTSS/VSIR/ITGB1	3	M1
GO:0032365	intracellular lipid transport	3/399	37/17913	0.0487919	0.149469	0.105905	PRKAG2/ANXA2/CES1	3	M1
GO:0043029	T cell homeostasis	3/399	37/17913	0.0487919	0.149469	0.105905	CORO1A/TGFB1/TCIRG1	3	M1
GO:0045124	regulation of bone resorption	3/399	37/17913	0.0487919	0.149469	0.105905	ADAM8/TNFAIP3/IL6	3	M1
GO:1905314	semi-lunar valve development	3/399	37/17913	0.0487919	0.149469	0.105905	TNFRSF1B/TGFB1/SNAI1	3	M1
GO:0006656	phosphatidylcholine biosynthetic process	3/399	38/17913	0.05213	0.157631	0.111689	LPCAT1/CAPN2/ACSL3	3	M1
GO:0010559	regulation of glycoprotein biosynthetic process	3/399	38/17913	0.05213	0.157631	0.111689	HBEGF/CTNNB1/AGO2	3	M1
GO:0033280	response to vitamin D	3/399	38/17913	0.05213	0.157631	0.111689	ATP2B1/PTGS2/TGFB1	3	M1
GO:0044088	regulation of vacuole organization	3/399	38/17913	0.05213	0.157631	0.111689	C9orf72/LRRK2/ANXA2	3	M1
GO:1902042	negative regulation of extrinsic apoptotic signaling pathway via death domain receptors	3/399	38/17913	0.05213	0.157631	0.111689	TNFAIP3/ITPRIP/TNFRSF10B	3	M1
GO:1904037	positive regulation of epithelial cell apoptotic process	3/399	38/17913	0.05213	0.157631	0.111689	THBS1/FOXO3/IL6	3	M1
GO:0006195	purine nucleotide catabolic process	3/399	39/17913	0.0555756	0.163924	0.116147	PDE4B/PDE4A/PNP	3	M1
GO:0010939	regulation of necrotic cell death	3/399	39/17913	0.0555756	0.163924	0.116147	PPIF/TSPO/BIRC3	3	M1
GO:0019432	triglyceride biosynthetic process	3/399	39/17913	0.0555756	0.163924	0.116147	GPAT3/ACSL1/GK	3	M1
GO:0030204	chondroitin sulfate metabolic process	3/399	39/17913	0.0555756	0.163924	0.116147	VCAN/DSE/CSGALNACT2	3	M1
GO:0044275	cellular carbohydrate catabolic process	3/399	39/17913	0.0555756	0.163924	0.116147	GK/AOAH/GK5	3	M1
GO:0048713	regulation of oligodendrocyte differentiation	3/399	39/17913	0.0555756	0.163924	0.116147	TNFRSF1B/CTNNB1/TLR2	3	M1
GO:0019369	arachidonic acid metabolic process	3/399	40/17913	0.0591269	0.172227	0.12203	PTGS2/PNPLA8/CYP1B1	3	M1
GO:0030810	positive regulation of nucleotide biosynthetic process	3/399	40/17913	0.0591269	0.172227	0.12203	HIF1A/PFKFB3/STAT3	3	M1
GO:0031952	regulation of protein autophosphorylation	3/399	40/17913	0.0591269	0.172227	0.12203	PTPRC/VEGFA/IQGAP1	3	M1
GO:0071470	cellular response to osmotic stress	3/399	40/17913	0.0591269	0.172227	0.12203	PTGS2/OXSR1/TSPO	3	M1
GO:1900373	positive regulation of purine nucleotide biosynthetic process	3/399	40/17913	0.0591269	0.172227	0.12203	HIF1A/PFKFB3/STAT3	3	M1
GO:1902893	regulation of pri-miRNA transcription by RNA polymerase II	3/399	40/17913	0.0591269	0.172227	0.12203	TGFB1/HIF1A/STAT3	3	M1
GO:0002639	positive regulation of immunoglobulin production	3/399	41/17913	0.0627823	0.177135	0.125508	PTPRC/TGFB1/IL6	3	M1
GO:0006692	prostanoid metabolic process	3/399	41/17913	0.0627823	0.177135	0.125508	PTGS2/IL1B/PNPLA8	3	M1
GO:0006693	prostaglandin metabolic process	3/399	41/17913	0.0627823	0.177135	0.125508	PTGS2/IL1B/PNPLA8	3	M1
GO:0009163	nucleoside biosynthetic process	3/399	41/17913	0.0627823	0.177135	0.125508	TYMP/UPP1/CDA	3	M1
GO:0014003	oligodendrocyte development	3/399	41/17913	0.0627823	0.177135	0.125508	TLR2/TGFB1/LYN	3	M1
GO:0019048	modulation by virus of host morphology or physiology	3/399	41/17913	0.0627823	0.177135	0.125508	TGFB1/RXRA/ZC3H12A	3	M1
GO:0032881	regulation of polysaccharide metabolic process	3/399	41/17913	0.0627823	0.177135	0.125508	TGFB1/NFKB1/PHLDA2	3	M1
GO:0034122	negative regulation of toll-like receptor signaling pathway	3/399	41/17913	0.0627823	0.177135	0.125508	CD14/TNFAIP3/LYN	3	M1
GO:0043489	RNA stabilization	3/399	41/17913	0.0627823	0.177135	0.125508	SLC11A1/MYD88/NAF1	3	M1
GO:0045601	regulation of endothelial cell differentiation	3/399	41/17913	0.0627823	0.177135	0.125508	BTG1/IL1B/CTNNB1	3	M1
GO:0046460	neutral lipid biosynthetic process	3/399	41/17913	0.0627823	0.177135	0.125508	GPAT3/ACSL1/GK	3	M1
GO:0046463	acylglycerol biosynthetic process	3/399	41/17913	0.0627823	0.177135	0.125508	GPAT3/ACSL1/GK	3	M1
GO:0048066	developmental pigmentation	3/399	41/17913	0.0627823	0.177135	0.125508	ATP6AP2/ZEB2/RAB27A	3	M1
GO:0098927	vesicle-mediated transport between endosomal compartments	3/399	41/17913	0.0627823	0.177135	0.125508	CORO1A/MSN/EZR	3	M1
GO:1903053	regulation of extracellular matrix organization	3/399	41/17913	0.0627823	0.177135	0.125508	TNFRSF1B/TGFB1/IL6	3	M1
GO:1903146	regulation of autophagy of mitochondrion	3/399	41/17913	0.0627823	0.177135	0.125508	TSPO/HIF1A/HK2	3	M1
GO:1903580	positive regulation of ATP metabolic process	3/399	41/17913	0.0627823	0.177135	0.125508	HIF1A/PFKFB3/STAT3	3	M1
GO:0035886	vascular smooth muscle cell differentiation	3/399	42/17913	0.06654	0.183253	0.129843	SOD2/VEGFA/ADM	3	M1
GO:0042088	T-helper 1 type immune response	3/399	42/17913	0.06654	0.183253	0.129843	SLC11A1/IL1B/RIPK2	3	M1
GO:0048247	lymphocyte chemotaxis	3/399	42/17913	0.06654	0.183253	0.129843	OXSR1/ADAM8/ADAM17	3	M1
GO:0050654	chondroitin sulfate proteoglycan metabolic process	3/399	42/17913	0.06654	0.183253	0.129843	VCAN/DSE/CSGALNACT2	3	M1
GO:0090311	regulation of protein deacetylation	3/399	42/17913	0.06654	0.183253	0.129843	VEGFA/TGFB1/LRRK2	3	M1
GO:1901659	glycosyl compound biosynthetic process	3/399	42/17913	0.06654	0.183253	0.129843	TYMP/UPP1/CDA	3	M1
GO:0003044	regulation of systemic arterial blood pressure mediated by a chemical signal	3/399	43/17913	0.0703981	0.190805	0.135193	SOD2/ATP6AP2/CES1	3	M1
GO:0006775	fat-soluble vitamin metabolic process	3/399	43/17913	0.0703981	0.190805	0.135193	IL1B/NFKB1/SNAI1	3	M1
GO:0044060	regulation of endocrine process	3/399	43/17913	0.0703981	0.190805	0.135193	IL1B/HCAR2/INHBA	3	M1
GO:1901031	regulation of response to reactive oxygen species	3/399	43/17913	0.0703981	0.190805	0.135193	GCH1/LRRK2/FOXO3	3	M1
GO:1990090	cellular response to nerve growth factor stimulus	3/399	43/17913	0.0703981	0.190805	0.135193	EHD1/CORO1A/FOXO3	3	M1
GO:0030850	prostate gland development	3/399	44/17913	0.0743548	0.19673	0.139392	CTNNB1/RARA/RXRA	3	M1
GO:0032965	regulation of collagen biosynthetic process	3/399	44/17913	0.0743548	0.19673	0.139392	TGFB1/VIM/IL6	3	M1
GO:0035850	epithelial cell differentiation involved in kidney development	3/399	44/17913	0.0743548	0.19673	0.139392	CTNNB1/BASP1/IQGAP1	3	M1
GO:0048599	oocyte development	3/399	44/17913	0.0743548	0.19673	0.139392	EREG/CTNNB1/FOXO3	3	M1
GO:1903573	negative regulation of response to endoplasmic reticulum stress	3/399	44/17913	0.0743548	0.19673	0.139392	LRRK2/PPP1R15A/PPP1R15B	3	M1
GO:0002820	negative regulation of adaptive immune response	3/399	45/17913	0.078408	0.203278	0.144031	SAMSN1/PTPRC/ZC3H12A	3	M1
GO:0033628	regulation of cell adhesion mediated by integrin	3/399	45/17913	0.078408	0.203278	0.144031	CYP1B1/LYN/FERMT3	3	M1
GO:0045058	T cell selection	3/399	45/17913	0.078408	0.203278	0.144031	PTPRC/STAT3/IL6	3	M1
GO:0046850	regulation of bone remodeling	3/399	45/17913	0.078408	0.203278	0.144031	ADAM8/TNFAIP3/IL6	3	M1
GO:0070266	necroptotic process	3/399	45/17913	0.078408	0.203278	0.144031	PPIF/CD14/BIRC3	3	M1
GO:0009948	anterior/posterior axis specification	3/399	46/17913	0.0825558	0.210776	0.149344	ETS2/CTNNB1/BASP1	3	M1
GO:0010799	regulation of peptidyl-threonine phosphorylation	3/399	46/17913	0.0825558	0.210776	0.149344	RIPK2/TGFB1/PRKAG2	3	M1
GO:0045687	positive regulation of glial cell differentiation	3/399	46/17913	0.0825558	0.210776	0.149344	TNFRSF1B/TLR2/TGFB1	3	M1
GO:0048538	thymus development	3/399	46/17913	0.0825558	0.210776	0.149344	CTNNB1/MAFB/JARID2	3	M1
GO:0060324	face development	3/399	46/17913	0.0825558	0.210776	0.149344	TGFB1/CSRNP1/RARA	3	M1
GO:0060711	labyrinthine layer development	3/399	46/17913	0.0825558	0.210776	0.149344	SOCS3/JUNB/ADM	3	M1
GO:0060986	endocrine hormone secretion	3/399	46/17913	0.0825558	0.210776	0.149344	IL1B/HCAR2/INHBA	3	M1
GO:0070169	positive regulation of biomineral tissue development	3/399	46/17913	0.0825558	0.210776	0.149344	ATP2B1/TGFB1/CEBPB	3	M1
GO:0070231	T cell apoptotic process	3/399	46/17913	0.0825558	0.210776	0.149344	ADAM8/HIF1A/DOCK8	3	M1
GO:0090199	regulation of release of cytochrome c from mitochondria	3/399	46/17913	0.0825558	0.210776	0.149344	PLAUR/PPIF/BID	3	M1
GO:1990089	response to nerve growth factor	3/399	46/17913	0.0825558	0.210776	0.149344	EHD1/CORO1A/FOXO3	3	M1
GO:2000107	negative regulation of leukocyte apoptotic process	3/399	46/17913	0.0825558	0.210776	0.149344	FCER1G/HIF1A/DOCK8	3	M1
GO:0042059	negative regulation of epidermal growth factor receptor signaling pathway	3/399	47/17913	0.086796	0.21626	0.15323	EREG/HBEGF/AREG	3	M1
GO:0045815	positive regulation of gene expression, epigenetic	3/399	47/17913	0.086796	0.21626	0.15323	CTNNB1/DDX21/TWISTNB	3	M1
GO:0045912	negative regulation of carbohydrate metabolic process	3/399	47/17913	0.086796	0.21626	0.15323	TGFB1/PLEK/STAT3	3	M1
GO:0048641	regulation of skeletal muscle tissue development	3/399	47/17913	0.086796	0.21626	0.15323	CTNNB1/TGFB1/DDX5	3	M1
GO:0032648	regulation of interferon-beta production	3/399	48/17913	0.0911265	0.224907	0.159356	RIPK2/REL/TLR2	3	M1
GO:0060389	pathway-restricted SMAD protein phosphorylation	3/399	48/17913	0.0911265	0.224907	0.159356	TGFB1/USP15/INHBA	3	M1
GO:0007595	lactation	3/399	49/17913	0.095545	0.232075	0.164435	VEGFA/HIF1A/HK2	3	M1
GO:0009994	oocyte differentiation	3/399	49/17913	0.095545	0.232075	0.164435	EREG/CTNNB1/FOXO3	3	M1
GO:0043113	receptor clustering	3/399	49/17913	0.095545	0.232075	0.164435	ITGB2/FLNA/TGFB1	3	M1
GO:0045981	positive regulation of nucleotide metabolic process	3/399	49/17913	0.095545	0.232075	0.164435	HIF1A/PFKFB3/STAT3	3	M1
GO:0097300	programmed necrotic cell death	3/399	49/17913	0.095545	0.232075	0.164435	PPIF/CD14/BIRC3	3	M1
GO:1900544	positive regulation of purine nucleotide metabolic process	3/399	49/17913	0.095545	0.232075	0.164435	HIF1A/PFKFB3/STAT3	3	M1
GO:1902369	negative regulation of RNA catabolic process	3/399	49/17913	0.095545	0.232075	0.164435	SLC11A1/MYD88/NAF1	3	M1
GO:1902475	L-alpha-amino acid transmembrane transport	3/399	49/17913	0.095545	0.232075	0.164435	SLC43A2/SLC7A7/SLC7A5	3	M1
[truncated: 9,691 more rows]
