# Supplementary material for: Single-cell RNA sequencing of human femoral head in vivo
Source: Aging (Albany NY). 2021 Jun 10;13(11):15595–619. doi: 10.18632/aging.203124 (PMC8221309; doi:10.18632/aging.203124)
Supplement: Supplementary Table 9 [file aging-13-203124-s010.xlsx]

## Sheet: Sheet1
Supplementary Table 9. KEGG enrichment analyses of each monocytes subtype.
ID	Description	GeneRatio	BgRatio	pvalue	p.adjust	qvalue	geneID	Count	Subtype
hsa05152	Tuberculosis	26/238	180/8036	1.36e-11	1.71e-09	1.26e-09	CTSS/ITGAX/LSP1/IL1B/CLEC7A/ITGB2/FCER1G/CORO1A/MYD88/RIPK2/TLR2/CD14/TGFB1/CLEC4E/IFNGR2/BID/ITGAM/PLK3/TCIRG1/NFKB1/MALT1/CEBPB/IFNGR1/IL1A/ATP6V0D1/IL6	26	M1
hsa05132	Salmonella infection	21/238	213/8036	1.17e-06	1.98e-05	1.45e-05	PTPRC/NLRP3/IL1B/FLNA/CXCL8/S100A10/CASP1/MYD88/CTNNB1/RIPK2/NFKBIA/AHNAK/TLR2/CD14/NFKB1/SNX18/ANXA2/BIRC3/TNFRSF10B/MAP2K3/IL6	21	M1
hsa05167	Kaposi sarcoma-associated herpesvirus infection	20/238	189/8036	6.94e-07	1.35e-05	9.88e-06	PTGS2/GABARAPL1/VEGFA/CXCL8/HLA-C/CTNNB1/CXCL2/NFKBIA/HLA-B/BID/CDKN1A/HIF1A/LYN/CD86/NFKB1/IFNGR1/STAT3/CXCL3/CXCL1/IL6	20	M1
hsa05131	Shigellosis	20/238	242/8036	3.03e-05	0.000319308	0.000233818	CD44/NLRP3/IL1B/GABARAPL1/CXCL8/CASP1/MYD88/RIPK2/NFKBIA/CD14/FOXO3/H3F3A/ITGB1/NFKB1/MALT1/CAST/CAPN2/DIAPH1/ITGA5/HK2	20	M1
hsa04060	Cytokine-cytokine receptor interaction	20/238	294/8036	0.000434428	0.00314029	0.00229953	TNFRSF1B/IL1B/CXCL8/CSF3R/CXCL2/TGFB1/IFNGR2/CCL20/CSF2RA/IL1RN/OSM/IFNGR1/IL1A/IL1R2/TNFRSF10B/IL6R/CXCL3/CXCL1/INHBA/IL6	20	M1
hsa04380	Osteoclast differentiation	19/238	128/8036	5.52e-09	3.03e-07	2.22e-07	IL1B/NCF2/LILRB2/LILRA5/LILRB3/FOSL2/NFKBIA/SOCS3/TGFB1/IFNGR2/LCP2/OSCAR/NFKB2/NCF1/NFKB1/IFNGR1/IL1A/FYN/JUNB	19	M1
hsa04145	Phagosome	19/238	152/8036	9.66e-08	2.72e-06	1.99e-06	CTSS/CLEC7A/OLR1/NCF2/ITGB2/HLA-C/CORO1A/CYBB/THBS1/HLA-B/TLR2/CD14/ITGAM/ITGB1/NCF1/TCIRG1/ATP6V0D1/ATP6V1B2/ITGA5	19	M1
hsa04621	NOD-like receptor signaling pathway	19/238	181/8036	1.51e-06	2.38e-05	1.74e-05	NAMPT/NLRP3/IL1B/GABARAPL1/CXCL8/CARD16/CASP1/MYD88/CYBB/CXCL2/RIPK2/NFKBIA/GBP2/TNFAIP3/NFKB1/BIRC3/CXCL3/CXCL1/IL6	19	M1
hsa05202	Transcriptional misregulation in cancer	19/238	192/8036	3.66e-06	4.87e-05	3.57e-05	BCL2A1/CXCL8/JMJD1C/REL/CD14/CDKN1A/ITGAM/NFKBIZ/H3F3A/RARA/DUSP6/CD86/NFKB1/CEBPB/DDX5/RXRA/BIRC3/IL1R2/IL6	19	M1
hsa05205	Proteoglycans in cancer	19/238	205/8036	9.57e-06	0.000110024	8.06e-05	CD44/PLAUR/VEGFA/FLNA/HBEGF/CTNNB1/THBS1/TLR2/TGFB1/MSN/CDKN1A/EZR/HIF1A/ITGB1/DDX5/STAT3/PRKCB/ITGA5/IQGAP1	19	M1
hsa04010	MAPK signaling pathway	19/238	294/8036	0.0011213	0.00691925	0.00506673	IL1B/EREG/VEGFA/MAP3K8/FLNA/DUSP1/MYD88/MAP3K2/CD14/TGFB1/NFKB2/AREG/DUSP6/NFKB1/IL1A/DUSP2/MAP4K4/PRKCB/MAP2K3	19	M1
hsa05140	Leishmaniasis	18/238	77/8036	5.59e-12	1.41e-09	1.04e-09	PTGS2/IL1B/NCF2/ITGB2/MYD88/CYBB/NFKBIA/TLR2/TGFB1/IFNGR2/ITGAM/MARCKSL1/ITGB1/NCF1/NFKB1/IFNGR1/IL1A/PRKCB	18	M1
hsa05146	Amoebiasis	17/238	102/8036	5.98e-09	3.03e-07	2.22e-07	IL1B/ITGB2/CXCL8/SERPINB9/CXCL2/TLR2/CD14/TGFB1/ITGAM/NFKB1/LAMB3/IL1R2/PRKCB/CD1C/CXCL3/CXCL1/IL6	17	M1
hsa04064	NF-kappa B signaling pathway	17/238	104/8036	8.12e-09	3.42e-07	2.51e-07	PTGS2/BCL2A1/IL1B/CXCL8/MYD88/CXCL2/NFKBIA/CD14/TNFAIP3/LYN/NFKB2/NFKB1/MALT1/BIRC3/PRKCB/CXCL3/CXCL1	17	M1
hsa04668	TNF signaling pathway	17/238	112/8036	2.57e-08	8.13e-07	5.95e-07	PTGS2/TNFRSF1B/IL1B/MAP3K8/CXCL2/NFKBIA/SOCS3/CCL20/TNFAIP3/NFKB1/CEBPB/BIRC3/JUNB/MAP2K3/CXCL3/CXCL1/IL6	17	M1
hsa04151	PI3K-Akt signaling pathway	17/238	354/8036	0.0334616	0.11597	0.0849205	EREG/VEGFA/CSF3R/MCL1/THBS1/TLR2/FOXO3/CDKN1A/ITGB1/AREG/NFKB1/OSM/LAMB3/RXRA/IL6R/ITGA5/IL6	17	M1
hsa05168	Herpes simplex virus 1 infection	17/238	491/8036	0.286124	0.555896	0.407063	CFP/IL1B/PILRA/HLA-C/MYD88/NFKBIA/HLA-B/SOCS3/TLR2/IFNGR2/BID/POU2F2/NFKB1/IFNGR1/BIRC3/ITGA5/IL6	17	M1
hsa05323	Rheumatoid arthritis	16/238	93/8036	1.06e-08	3.82e-07	2.8e-07	IL1B/ITGB2/VEGFA/CXCL8/CXCL2/TLR2/TGFB1/CCL20/CD86/TCIRG1/IL1A/ATP6V0D1/ATP6V1B2/CXCL3/CXCL1/IL6	16	M1
hsa05169	Epstein-Barr virus infection	16/238	202/8036	0.000312065	0.00232213	0.00170042	CD44/HLA-C/MYD88/NFKBIA/HLA-B/TLR2/BID/CDKN1A/TNFAIP3/LYN/NFKB2/VIM/NFKB1/STAT3/MAP2K3/IL6	16	M1
hsa05163	Human cytomegalovirus infection	16/238	225/8036	0.00101916	0.00644621	0.00472034	PTGS2/IL1B/VEGFA/CXCL8/HLA-C/CTNNB1/NFKBIA/HLA-B/BID/CDKN1A/AKAP13/NFKB1/STAT3/PRKCB/IL6R/IL6	16	M1
hsa05134	Legionellosis	15/238	57/8036	5.56e-11	4.69e-09	3.43e-09	IL1B/ITGB2/CXCL8/CASP1/MYD88/CXCL2/NFKBIA/TLR2/CD14/ITGAM/NFKB2/NFKB1/CXCL3/CXCL1/IL6	15	M1
hsa04640	Hematopoietic cell lineage	15/238	99/8036	1.79e-07	4.53e-06	3.31e-06	CD44/CD55/ANPEP/IL1B/CD37/CSF3R/CD14/ITGAM/CSF2RA/IL1A/IL1R2/IL6R/ITGA5/CD1C/IL6	15	M1
hsa05164	Influenza A	15/238	171/8036	0.000158087	0.0013332	0.000976255	NLRP3/IL1B/CXCL8/CASP1/MYD88/NFKBIA/SOCS3/IFNGR2/BID/NFKB1/IFNGR1/IL1A/TNFRSF10B/PRKCB/IL6	15	M1
hsa05130	Pathogenic Escherichia coli infection	15/238	192/8036	0.000555116	0.00379579	0.00277953	NLRP3/IL1B/CXCL8/CASP1/MYD88/NFKBIA/EZR/MYO1G/ITGB1/NFKB1/FYN/MYH9/TNFRSF10B/MYO1F/IL6	15	M1
hsa04657	IL-17 signaling pathway	14/238	94/8036	5.77e-07	1.22e-05	8.91e-06	PTGS2/IL1B/CXCL8/S100A9/CXCL2/NFKBIA/CCL20/TNFAIP3/S100A8/NFKB1/CEBPB/CXCL3/CXCL1/IL6	14	M1
hsa04625	C-type lectin receptor signaling pathway	14/238	104/8036	2.02e-06	3.01e-05	2.21e-05	PTGS2/LSP1/NLRP3/IL1B/CLEC7A/FCER1G/CASP1/NFKBIA/CLEC4E/NFKB2/PLK3/NFKB1/MALT1/IL6	14	M1
hsa04066	HIF-1 signaling pathway	14/238	109/8036	3.58e-06	4.87e-05	3.57e-05	TIMP1/VEGFA/CYBB/IFNGR2/CDKN1A/HIF1A/PFKFB3/NFKB1/IFNGR1/STAT3/PRKCB/IL6R/HK2/IL6	14	M1
hsa05145	Toxoplasmosis	14/238	112/8036	4.95e-06	6.27e-05	4.59e-05	PPIF/ALOX5/MYD88/NFKBIA/TLR2/TGFB1/IFNGR2/ITGB1/NFKB1/IFNGR1/LAMB3/STAT3/BIRC3/MAP2K3	14	M1
hsa05135	Yersinia infection	14/238	130/8036	2.81e-05	0.000308637	0.000226005	NLRP3/IL1B/CXCL8/CASP1/MYD88/NFKBIA/LCP2/FYB1/ITGB1/NFKB1/SKAP2/ITGA5/MAP2K3/IL6	14	M1
hsa04217	Necroptosis	14/238	159/8036	0.000251503	0.00192819	0.00141195	NLRP3/IL1B/CASP1/CYBB/IFNGR2/FTH1/BID/TNFAIP3/IFNGR1/IL1A/STAT3/CAPN2/BIRC3/TNFRSF10B	14	M1
hsa05206	MicroRNAs in cancer	14/238	310/8036	0.0761812	0.229451	0.168019	CD44/PTGS2/VEGFA/MCL1/THBS1/CYP1B1/CDKN1A/EZR/VIM/NFKB1/ZEB2/STAT3/PRKCB/ITGA5	14	M1
hsa05165	Human papillomavirus infection	14/238	331/8036	0.113671	0.302725	0.221675	PTGS2/VEGFA/HLA-C/CTNNB1/THBS1/HLA-B/CDKN1A/ITGB1/TCIRG1/NFKB1/LAMB3/ATP6V0D1/ATP6V1B2/ITGA5	14	M1
hsa05133	Pertussis	13/238	76/8036	2.83e-07	6.51e-06	4.77e-06	NLRP3/IL1B/ITGB2/CXCL8/CASP1/MYD88/CD14/ITGAM/ITGB1/NFKB1/IL1A/ITGA5/IL6	13	M1
hsa04933	AGE-RAGE signaling pathway in diabetic complications	13/238	100/8036	7.01e-06	8.45e-05	6.19e-05	IL1B/VEGFA/CXCL8/CYBB/TGFB1/NFKB1/IL1A/STAT3/PRKCB/DIAPH1/THBD/F3/IL6	13	M1
hsa04062	Chemokine signaling pathway	13/238	189/8036	0.00397043	0.0193177	0.0141457	FGR/CXCL8/CXCL2/NFKBIA/FOXO3/CCL20/LYN/NCF1/NFKB1/STAT3/PRKCB/CXCL3/CXCL1	13	M1
hsa04510	Focal adhesion	13/238	201/8036	0.00663854	0.029992	0.0219621	VEGFA/FLNA/CTNNB1/THBS1/VASP/ITGB1/FYN/LAMB3/CAPN2/BIRC3/PRKCB/DIAPH1/ITGA5	13	M1
hsa04015	Rap1 signaling pathway	13/238	210/8036	0.00945072	0.038565	0.0282398	FPR1/ITGB2/VEGFA/CTNNB1/THBS1/VASP/ITGAM/LCP2/FYB1/RASSF5/ITGB1/PRKCB/MAP2K3	13	M1
hsa05120	Epithelial cell signaling in Helicobacter pylori infection	12/238	70/8036	8.02e-07	1.45e-05	1.06e-05	HBEGF/CXCL8/CXCL2/NFKBIA/LYN/TCIRG1/NFKB1/ATP6V0D1/ATP6V1B2/ADAM17/CXCL3/CXCL1	12	M1
hsa04659	Th17 cell differentiation	12/238	107/8036	7.08e-05	0.000689345	0.000504783	IL1B/NFKBIA/TGFB1/IFNGR2/RARA/HIF1A/NFKB1/IFNGR1/STAT3/RXRA/IL6R/IL6	12	M1
hsa04670	Leukocyte transendothelial migration	12/238	113/8036	0.000120727	0.00105324	0.000771251	NCF2/ITGB2/CTNNB1/CYBB/MSN/VASP/ITGAM/RASSF5/EZR/ITGB1/NCF1/PRKCB	12	M1
hsa04650	Natural killer cell mediated cytotoxicity	12/238	131/8036	0.000484493	0.00340491	0.0024933	CD48/ITGB2/FCER1G/HLA-C/HLA-B/IFNGR2/BID/LCP2/IFNGR1/FYN/TNFRSF10B/PRKCB	12	M1
hsa04218	Cellular senescence	12/238	156/8036	0.00223903	0.0123147	0.0090176	CXCL8/HLA-C/HLA-B/TGFB1/FOXO3/CDKN1A/RASSF5/NFKB1/IL1A/CAPN2/MAP2K3/IL6	12	M1
hsa05161	Hepatitis B	12/238	162/8036	0.00306377	0.0155027	0.0113521	CXCL8/MYD88/NFKBIA/TLR2/TGFB1/BID/CDKN1A/NFKB1/STAT3/PRKCB/MAP2K3/IL6	12	M1
hsa05170	Human immunodeficiency virus 1 infection	12/238	212/8036	0.0235	0.0861667	0.0630969	TNFRSF1B/HLA-C/MYD88/NFKBIA/HLA-B/TLR2/BID/AP1S2/NFKB1/APOBEC3A/PRKCB/MAP2K3	12	M1
hsa05166	Human T-cell leukemia virus 1 infection	12/238	219/8036	0.0293	0.102957	0.0753918	ITGB2/HLA-C/ETS2/NFKBIA/HLA-B/TGFB1/CDKN1A/TSPO/NFKB2/NFKB1/IL1R2/IL6	12	M1
hsa04610	Complement and coagulation cascades	11/238	85/8036	3.76e-05	0.0003809	0.00027892	SERPINA1/ITGAX/C5AR1/PLAUR/CD55/ITGB2/ITGAM/F5/SERPINB2/THBD/F3	11	M1
hsa04620	Toll-like receptor signaling pathway	11/238	104/8036	0.000239927	0.00189692	0.00138905	IL1B/MAP3K8/CXCL8/MYD88/NFKBIA/TLR2/CD14/CD86/NFKB1/MAP2K3/IL6	11	M1
hsa05162	Measles	11/238	139/8036	0.00271245	0.0145033	0.0106203	IL1B/MYD88/NFKBIA/TLR2/MSN/BID/TNFAIP3/NFKB1/IL1A/STAT3/IL6	11	M1
hsa04514	Cell adhesion molecules (CAMs)	11/238	148/8036	0.00439731	0.0209909	0.0153709	VCAN/PTPRC/ITGB2/SELL/HLA-C/HLA-B/ITGAM/ICAM3/VSIR/ITGB1/CD86	11	M1
hsa04932	Non-alcoholic fatty liver disease (NAFLD)	11/238	149/8036	0.00462698	0.0216782	0.0158742	IL1B/CXCL8/SOCS3/TGFB1/BID/NFKB1/IL1A/PRKAG2/RXRA/IL6R/IL6	11	M1
hsa04630	JAK-STAT signaling pathway	11/238	162/8036	0.00857155	0.0355509	0.0260327	CSF3R/MCL1/SOCS3/IFNGR2/CDKN1A/CSF2RA/OSM/IFNGR1/STAT3/IL6R/IL6	11	M1
hsa04810	Regulation of actin cytoskeleton	11/238	214/8036	0.0529431	0.169552	0.124157	ITGAX/ITGB2/SPATA13/MSN/ITGAM/EZR/ITGB1/MYH9/DIAPH1/ITGA5/IQGAP1	11	M1
hsa05010	Alzheimer disease	11/238	369/8036	0.535822	0.813823	0.595934	PTGS2/IL1B/PPIF/CTNNB1/CYBB/BID/NFKB1/IL1A/CAPN2/ADAM17/IL6	11	M1
hsa05142	Chagas disease (American trypanosomiasis)	10/238	102/8036	0.000839883	0.00544847	0.00398973	IL1B/CXCL8/MYD88/NFKBIA/TLR2/TGFB1/IFNGR2/NFKB1/IFNGR1/IL6	10	M1
hsa04210	Apoptosis	10/238	136/8036	0.00699902	0.0305302	0.0223562	CTSS/BCL2A1/CTSH/MCL1/NFKBIA/BID/NFKB1/CAPN2/BIRC3/TNFRSF10B	10	M1
hsa05418	Fluid shear stress and atherosclerosis	10/238	139/8036	0.00812352	0.0348348	0.0255083	IL1B/NCF2/VEGFA/DUSP1/CTNNB1/NCF1/NFKB1/IL1A/IL1R2/THBD	10	M1
hsa05203	Viral carcinogenesis	10/238	204/8036	0.0810477	0.241236	0.176649	HLA-C/NFKBIA/REL/HLA-B/CDKN1A/LYN/NFKB2/NFKB1/ATP6V0D1/STAT3	10	M1
hsa05321	Inflammatory bowel disease (IBD)	9/238	65/8036	0.000113367	0.00102435	0.000750095	IL1B/TLR2/TGFB1/IFNGR2/NFKB1/IFNGR1/IL1A/STAT3/IL6	9	M1
hsa04920	Adipocytokine signaling pathway	9/238	69/8036	0.00018133	0.00147989	0.00108367	TNFRSF1B/ACSL1/NFKBIA/SOCS3/NFKB1/PRKAG2/STAT3/RXRA/ACSL3	9	M1
hsa05235	PD-L1 expression and PD-1 checkpoint pathway in cancer	9/238	89/8036	0.00121769	0.00716456	0.00524636	MYD88/NFKBIA/TLR2/IFNGR2/HIF1A/NFKB1/IFNGR1/STAT3/MAP2K3	9	M1
hsa04061	Viral protein interaction with cytokine and cytokine receptor	9/238	100/8036	0.00275162	0.0145033	0.0106203	TNFRSF1B/CXCL8/CXCL2/CCL20/TNFRSF10B/IL6R/CXCL3/CXCL1/IL6	9	M1
hsa04142	Lysosome	9/238	128/8036	0.0135455	0.0535469	0.0392105	CTSS/SLC11A1/LAPTM5/CTSH/AP1S2/LITAF/TCIRG1/ATP6V0D1/HGSNAT	9	M1
hsa04068	FoxO signaling pathway	9/238	131/8036	0.0155728	0.0596958	0.0437132	SOD2/GABARAPL1/TGFB1/FOXO3/CDKN1A/PLK3/PRKAG2/STAT3/IL6	9	M1
hsa04024	cAMP signaling pathway	9/238	216/8036	0.190933	0.424926	0.311158	ATP2B1/PDE4B/NFKBIA/PDE4A/NFKB1/ATP1B3/HCAR3/FFAR2/HCAR2	9	M1
hsa05144	Malaria	8/238	50/8036	9.63e-05	0.000902775	0.000661071	IL1B/ITGB2/CXCL8/MYD88/THBS1/TLR2/TGFB1/IL6	8	M1
hsa04664	Fc epsilon RI signaling pathway	8/238	68/8036	0.000838877	0.00544847	0.00398973	FCER1G/ALOX5/LCP2/LYN/FYN/MAP2K3/FCER1A/ALOX5AP	8	M1
hsa04662	B cell receptor signaling pathway	8/238	82/8036	0.00283734	0.0146499	0.0107276	LILRB2/LILRA5/LILRB3/NFKBIA/LYN/NFKB1/MALT1/PRKCB	8	M1
hsa05222	Small cell lung cancer	8/238	92/8036	0.0057584	0.0264887	0.0193967	PTGS2/NFKBIA/CDKN1A/ITGB1/NFKB1/LAMB3/RXRA/BIRC3	8	M1
hsa04928	Parathyroid hormone synthesis, secretion and action	8/238	106/8036	0.0131292	0.0527252	0.0386088	HBEGF/PDE4B/MAFB/PDE4A/CDKN1A/AKAP13/RXRA/PRKCB	8	M1
hsa05160	Hepatitis C	8/238	156/8036	0.0916136	0.26043	0.190704	CTNNB1/NFKBIA/SOCS3/BID/CDKN1A/NFKB1/STAT3/RXRA	8	M1
hsa05416	Viral myocarditis	7/238	60/8036	0.0018551	0.0104298	0.00763737	CD55/ITGB2/HLA-C/HLA-B/BID/CD86/FYN	7	M1
hsa05221	Acute myeloid leukemia	7/238	67/8036	0.00350724	0.0173987	0.0127404	BCL2A1/CD14/ITGAM/RARA/DUSP6/NFKB1/STAT3	7	M1
hsa04660	T cell receptor signaling pathway	7/238	104/8036	0.0343386	0.117401	0.0859687	PTPRC/MAP3K8/NFKBIA/LCP2/NFKB1/MALT1/FYN	7	M1
hsa04931	Insulin resistance	7/238	108/8036	0.0408742	0.136068	0.0996379	NFKBIA/SOCS3/NFKB1/PRKAG2/STAT3/PRKCB/IL6	7	M1
hsa04611	Platelet activation	7/238	124/8036	0.074811	0.228038	0.166985	FCER1G/VASP/LCP2/LYN/ITGB1/FERMT3/FYN	7	M1
hsa04530	Tight junction	7/238	161/8036	0.200392	0.437061	0.320045	MSN/VASP/EZR/ITGB1/PRKAG2/MYH9/CD1C	7	M1
hsa04144	Endocytosis	7/238	248/8036	0.606129	0.848356	0.621222	EHD1/HLA-C/HLA-B/IQSEC1/RAB31/VPS37B/EHD4	7	M1
hsa05219	Bladder cancer	6/238	41/8036	0.0011943	0.00716456	0.00524636	VEGFA/HBEGF/CXCL8/TYMP/THBS1/CDKN1A	6	M1
hsa05332	Graft-versus-host disease	6/238	42/8036	0.00135942	0.00781664	0.00572385	IL1B/HLA-C/HLA-B/CD86/IL1A/IL6	6	M1
hsa05223	Non-small cell lung cancer	6/238	68/8036	0.0150134	0.0584367	0.0427912	FOXO3/CDKN1A/RASSF5/STAT3/RXRA/PRKCB	6	M1
hsa03320	PPAR signaling pathway	6/238	77/8036	0.0261555	0.0945334	0.0692235	OLR1/ACSL1/GK/RXRA/PLIN2/ACSL3	6	M1
hsa01521	EGFR tyrosine kinase inhibitor resistance	6/238	79/8036	0.0292202	0.102957	0.0753918	VEGFA/FOXO3/STAT3/PRKCB/IL6R/IL6	6	M1
hsa05410	Hypertrophic cardiomyopathy (HCM)	6/238	90/8036	0.0502616	0.163028	0.11938	TGFB1/ITGB1/PRKAG2/TPM4/ITGA5/IL6	6	M1
hsa04666	Fc gamma R-mediated phagocytosis	6/238	93/8036	0.057279	0.181145	0.132646	PTPRC/VASP/MARCKSL1/LYN/NCF1/PRKCB	6	M1
hsa04071	Sphingolipid signaling pathway	6/238	119/8036	0.141135	0.358972	0.262863	FCER1G/BID/NFKB1/FYN/PRKCB/FCER1A	6	M1
hsa04014	Ras signaling pathway	6/238	232/8036	0.689868	0.910907	0.667026	VEGFA/ETS2/REL/RASSF5/NFKB1/PRKCB	6	M1
hsa04216	Ferroptosis	5/238	41/8036	0.00685987	0.0304482	0.0222962	ACSL1/CYBB/FTH1/SAT1/ACSL3	5	M1
hsa04940	Type I diabetes mellitus	5/238	43/8036	0.00840077	0.0354233	0.0259392	IL1B/HLA-C/HLA-B/CD86/IL1A	5	M1
hsa04623	Cytosolic DNA-sensing pathway	5/238	63/8036	0.0382228	0.128938	0.0944171	IL1B/CASP1/NFKBIA/NFKB1/IL6	5	M1
hsa05212	Pancreatic cancer	5/238	76/8036	0.0742026	0.228038	0.166985	VEGFA/TGFB1/CDKN1A/NFKB1/STAT3	5	M1
hsa04012	ErbB signaling pathway	5/238	85/8036	0.10705	0.291222	0.213252	EREG/HBEGF/CDKN1A/AREG/PRKCB	5	M1
hsa05210	Colorectal cancer	5/238	86/8036	0.11108	0.29897	0.218925	EREG/CTNNB1/TGFB1/CDKN1A/AREG	5	M1
hsa04512	ECM-receptor interaction	5/238	88/8036	0.119356	0.308134	0.225636	CD44/THBS1/ITGB1/LAMB3/ITGA5	5	M1
hsa05150	Staphylococcus aureus infection	5/238	96/8036	0.155189	0.373933	0.273818	C5AR1/FPR1/ITGB2/ITGAM/FPR2	5	M1
hsa05215	Prostate cancer	5/238	97/8036	0.159955	0.378211	0.276951	CTNNB1/NFKBIA/CDKN1A/NFKB1/IL1R2	5	M1
hsa04935	Growth hormone synthesis, secretion and action	5/238	119/8036	0.277058	0.545629	0.399546	SOCS3/STAT3/PRKCB/JUNB/MAP2K3	5	M1
hsa04919	Thyroid hormone signaling pathway	5/238	121/8036	0.288553	0.555896	0.407063	CTNNB1/HIF1A/RXRA/PRKCB/ATP1B3	5	M1
hsa04550	Signaling pathways regulating pluripotency of stem cells	5/238	143/8036	0.418047	0.700436	0.512905	CTNNB1/SKIL/STAT3/JARID2/INHBA	5	M1
hsa04390	Hippo signaling pathway	5/238	157/8036	0.499056	0.787694	0.576801	ITGB2/CTNNB1/TGFB1/AREG/BIRC3	5	M1
hsa04080	Neuroactive ligand-receptor interaction	5/238	341/8036	0.976367	0.998045	0.730834	C5AR1/FPR1/TSPO/FPR2/ADM	5	M1
hsa05020	Prion diseases	4/238	35/8036	0.0191219	0.0722066	0.0528744	IL1B/IL1A/FYN/IL6	4	M1
hsa05143	African trypanosomiasis	4/238	37/8036	0.0230423	0.085731	0.0627779	IL1B/MYD88/PRKCB/IL6	4	M1
hsa00240	Pyrimidine metabolism	4/238	57/8036	0.0877775	0.25236	0.184795	TYMP/UPP1/PNP/CDA	4	M1
hsa05014	Amyotrophic lateral sclerosis (ALS)	4/238	57/8036	0.0877775	0.25236	0.184795	TNFRSF1B/CASP1/BID/MAP2K3	4	M1
hsa00590	Arachidonic acid metabolism	4/238	63/8036	0.115864	0.305351	0.223598	PTGS2/ALOX5/LTA4H/CYP4F3	4	M1
hsa04137	Mitophagy - animal	4/238	68/8036	0.141886	0.358972	0.262863	GABARAPL1/FOXO3/USP15/HIF1A	4	M1
hsa05211	Renal cell carcinoma	4/238	69/8036	0.147349	0.365648	0.267751	VEGFA/TGFB1/CDKN1A/HIF1A	4	M1
hsa04917	Prolactin signaling pathway	4/238	70/8036	0.152892	0.37194	0.272359	SOCS3/FOXO3/NFKB1/STAT3	4	M1
hsa05230	Central carbon metabolism in cancer	4/238	70/8036	0.152892	0.37194	0.272359	SLC7A5/HIF1A/SLC16A3/HK2	4	M1
hsa04520	Adherens junction	4/238	71/8036	0.158514	0.378211	0.276951	CTNNB1/FYN/SNAI1/IQGAP1	4	M1
hsa04115	p53 signaling pathway	4/238	73/8036	0.169981	0.394544	0.288911	THBS1/BID/CDKN1A/TNFRSF10B	4	M1
hsa05220	Chronic myeloid leukemia	4/238	76/8036	0.187704	0.42401	0.310488	NFKBIA/TGFB1/CDKN1A/NFKB1	4	M1
hsa04612	Antigen processing and presentation	4/238	78/8036	0.199837	0.437061	0.320045	CTSS/IFI30/HLA-C/HLA-B	4	M1
hsa00983	Drug metabolism - other enzymes	4/238	79/8036	0.205991	0.439556	0.321871	TYMP/UPP1/CDA/CES1	4	M1
hsa04211	Longevity regulating pathway	4/238	89/8036	0.270114	0.5381	0.394032	SOD2/FOXO3/NFKB1/PRKAG2	4	M1
hsa04658	Th1 and Th2 cell differentiation	4/238	92/8036	0.290032	0.555896	0.407063	NFKBIA/IFNGR2/NFKB1/IFNGR1	4	M1
hsa04912	GnRH signaling pathway	4/238	93/8036	0.296719	0.560223	0.410232	HBEGF/MAP3K2/PRKCB/MAP2K3	4	M1
hsa04970	Salivary secretion	4/238	93/8036	0.296719	0.560223	0.410232	ATP2B1/BST1/PRKCB/ATP1B3	4	M1
hsa04350	TGF-beta signaling pathway	4/238	94/8036	0.303424	0.564459	0.413334	THBS1/TGFB1/TGIF1/INHBA	4	M1
hsa05414	Dilated cardiomyopathy (DCM)	4/238	96/8036	0.316884	0.585195	0.428518	TGFB1/ITGB1/TPM4/ITGA5	4	M1
hsa04972	Pancreatic secretion	4/238	102/8036	0.35749	0.641454	0.469715	ATP2B1/BST1/PRKCB/ATP1B3	4	M1
hsa04726	Serotonergic synapse	4/238	115/8036	0.444866	0.735628	0.538675	PTGS2/ALOX5/DUSP1/PRKCB	4	M1
hsa04722	Neurotrophin signaling pathway	4/238	119/8036	0.471119	0.759192	0.55593	RIPK2/NFKBIA/FOXO3/NFKB1	4	M1
hsa04926	Relaxin signaling pathway	4/238	129/8036	0.534551	0.813823	0.595934	VEGFA/NFKBIA/TGFB1/NFKB1	4	M1
hsa00230	Purine metabolism	4/238	130/8036	0.540691	0.813823	0.595934	PDE4B/PDE4A/PNP/ADA2	4	M1
hsa04140	Autophagy - animal	4/238	137/8036	0.582473	0.837305	0.613129	GABARAPL1/C9orf72/VMP1/HIF1A	4	M1
hsa04072	Phospholipase D signaling pathway	4/238	148/8036	0.643512	0.882457	0.646193	FCER1G/CXCL8/FYN/FCER1A	4	M1
hsa04261	Adrenergic signaling in cardiomyocytes	4/238	149/8036	0.648763	0.882457	0.646193	ATP2B1/CREM/TPM4/ATP1B3	4	M1
hsa05226	Gastric cancer	4/238	149/8036	0.648763	0.882457	0.646193	CTNNB1/TGFB1/CDKN1A/RXRA	4	M1
hsa04921	Oxytocin signaling pathway	4/238	154/8036	0.674247	0.902563	0.660916	PTGS2/CDKN1A/PRKAG2/PRKCB	4	M1
hsa04022	cGMP-PKG signaling pathway	4/238	167/8036	0.734414	0.924841	0.677229	ATP2B1/PPIF/VASP/ATP1B3	4	M1
hsa05225	Hepatocellular carcinoma	4/238	168/8036	0.738678	0.924841	0.677229	CTNNB1/TGFB1/CDKN1A/PRKCB	4	M1
hsa04714	Thermogenesis	4/238	231/8036	0.915952	0.985769	0.721845	ACSL1/PRKAG2/ACSL3/MAP2K3	4	M1
hsa04966	Collecting duct acid secretion	3/238	27/8036	0.0444717	0.146121	0.107	TCIRG1/ATP6V0D1/ATP6V1B2	3	M1
hsa01523	Antifolate resistance	3/238	31/8036	0.0627531	0.196006	0.143529	IL1B/NFKB1/IL6	3	M1
hsa00760	Nicotinate and nicotinamide metabolism	3/238	35/8036	0.0839486	0.246965	0.180844	NAMPT/PNP/BST1	3	M1
hsa05216	Thyroid cancer	3/238	37/8036	0.0955476	0.268595	0.196683	CTNNB1/CDKN1A/RXRA	3	M1
hsa05330	Allograft rejection	3/238	38/8036	0.10158	0.279344	0.204554	HLA-C/HLA-B/CD86	3	M1
hsa04973	Carbohydrate digestion and absorption	3/238	47/8036	0.161873	0.379203	0.277677	PRKCB/ATP1B3/HK2	3	M1
hsa04672	Intestinal immune network for IgA production	3/238	49/8036	0.176496	0.405941	0.297256	TGFB1/CD86/IL6	3	M1
hsa05110	Vibrio cholerae infection	3/238	50/8036	0.183941	0.419253	0.307005	TCIRG1/ATP6V0D1/ATP6V1B2	3	M1
hsa04913	Ovarian steroidogenesis	3/238	51/8036	0.191468	0.424926	0.311158	PTGS2/ALOX5/CYP1B1	3	M1
hsa04961	Endocrine and other factor-regulated calcium reabsorption	3/238	53/8036	0.206748	0.439556	0.321871	ATP2B1/PRKCB/ATP1B3	3	M1
hsa05320	Autoimmune thyroid disease	3/238	53/8036	0.206748	0.439556	0.321871	HLA-C/HLA-B/CD86	3	M1
hsa05213	Endometrial cancer	3/238	58/8036	0.246015	0.506032	0.370549	CTNNB1/FOXO3/CDKN1A	3	M1
hsa04370	VEGF signaling pathway	3/238	59/8036	0.254013	0.513459	0.375988	PTGS2/VEGFA/PRKCB	3	M1
hsa04978	Mineral absorption	3/238	59/8036	0.254013	0.513459	0.375988	ATP2B1/FTH1/ATP1B3	3	M1
hsa04213	Longevity regulating pathway - multiple species	3/238	62/8036	0.278206	0.545629	0.399546	SOD2/FOXO3/PRKAG2	3	M1
hsa04622	RIG-I-like receptor signaling pathway	3/238	70/8036	0.343451	0.625711	0.458187	CXCL8/NFKBIA/NFKB1	3	M1
hsa01524	Platinum drug resistance	3/238	73/8036	0.367891	0.650884	0.47662	BID/CDKN1A/BIRC3	3	M1
hsa05100	Bacterial invasion of epithelial cells	3/238	73/8036	0.367891	0.650884	0.47662	CTNNB1/ITGB1/ITGA5	3	M1
hsa04918	Thyroid hormone synthesis	3/238	75/8036	0.384101	0.67019	0.490757	ASGR1/PRKCB/ATP1B3	3	M1
hsa04971	Gastric acid secretion	3/238	76/8036	0.392172	0.674963	0.494252	EZR/PRKCB/ATP1B3	3	M1
hsa05412	Arrhythmogenic right ventricular cardiomyopathy (ARVC)	3/238	77/8036	0.400217	0.679563	0.49762	CTNNB1/ITGB1/ITGA5	3	M1
hsa04721	Synaptic vesicle cycle	3/238	78/8036	0.408232	0.688551	0.504202	TCIRG1/ATP6V0D1/ATP6V1B2	3	M1
hsa04146	Peroxisome	3/238	83/8036	0.447779	0.735636	0.538681	SOD2/ACSL1/ACSL3	3	M1
hsa04976	Bile secretion	3/238	90/8036	0.50126	0.787694	0.576801	AQP9/RXRA/ATP1B3	3	M1
hsa05032	Morphine addiction	3/238	91/8036	0.508688	0.789559	0.578167	PDE4B/PDE4A/PRKCB	3	M1
hsa00564	Glycerophospholipid metabolism	3/238	98/8036	0.558998	0.815989	0.59752	GPCPD1/GPAT3/LPCAT1	3	M1
hsa04925	Aldosterone synthesis and secretion	3/238	98/8036	0.558998	0.815989	0.59752	ATP2B1/PRKCB/ATP1B3	3	M1
hsa05231	Choline metabolism in cancer	3/238	98/8036	0.558998	0.815989	0.59752	GPCPD1/HIF1A/PRKCB	3	M1
hsa04750	Inflammatory mediator regulation of TRP channels	3/238	100/8036	0.572796	0.828099	0.606388	IL1B/PRKCB/MAP2K3	3	M1
hsa04152	AMPK signaling pathway	3/238	120/8036	0.69534	0.911508	0.667466	FOXO3/PFKFB3/PRKAG2	3	M1
hsa04110	Cell cycle	3/238	124/8036	0.716394	0.924841	0.677229	TGFB1/CDKN1A/CCNH	3	M1
hsa00190	Oxidative phosphorylation	3/238	133/8036	0.75964	0.924841	0.677229	TCIRG1/ATP6V0D1/ATP6V1B2	3	M1
hsa04270	Vascular smooth muscle contraction	3/238	135/8036	0.768496	0.924841	0.677229	MYH9/PRKCB/ADM	3	M1
hsa04910	Insulin signaling pathway	3/238	137/8036	0.777085	0.924841	0.677229	SOCS3/PRKAG2/HK2	3	M1
hsa04120	Ubiquitin mediated proteolysis	3/238	140/8036	0.789479	0.932184	0.682606	SOCS3/UBE2R2/BIRC3	3	M1
hsa05224	Breast cancer	3/238	147/8036	0.816191	0.947231	0.693624	CTNNB1/CDKN1A/NFKB2	3	M1
hsa04150	mTOR signaling pathway	3/238	155/8036	0.843158	0.965244	0.706815	SLC7A5/ATP6V1B2/PRKCB	3	M1
hsa04141	Protein processing in endoplasmic reticulum	3/238	167/8036	0.877189	0.973372	0.712767	PPP1R15A/CKAP4/CAPN2	3	M1
hsa04020	Calcium signaling pathway	3/238	201/8036	0.940822	0.994491	0.728231	ATP2B1/PPIF/PRKCB	3	M1
hsa05012	Parkinson disease	3/238	249/8036	0.980396	0.998045	0.730834	PPIF/DUSP1/LRRK2	3	M1
hsa00061	Fatty acid biosynthesis	2/238	18/8036	0.0979749	0.272392	0.199463	ACSL1/ACSL3	2	M1
hsa00532	Glycosaminoglycan biosynthesis - chondroitin sulfate / dermatan sulfate	2/238	20/8036	0.117141	0.305533	0.223731	DSE/CSGALNACT2	2	M1
hsa04614	Renin-angiotensin system	2/238	23/8036	0.147415	0.365648	0.267751	ANPEP/ATP6AP2	2	M1
hsa00052	Galactose metabolism	2/238	31/8036	0.233588	0.488412	0.357647	B4GALT1/HK2	2	M1
hsa05310	Asthma	2/238	31/8036	0.233588	0.488412	0.357647	FCER1G/FCER1A	2	M1
hsa04215	Apoptosis - multiple species	2/238	32/8036	0.244641	0.506032	0.370549	BID/BIRC3	2	M1
hsa00051	Fructose and mannose metabolism	2/238	33/8036	0.255715	0.513459	0.375988	PFKFB3/HK2	2	M1
hsa04960	Aldosterone-regulated sodium reabsorption	2/238	37/8036	0.300002	0.562226	0.411699	PRKCB/ATP1B3	2	M1
hsa00380	Tryptophan metabolism	2/238	42/8036	0.354685	0.640967	0.469358	KYNU/CYP1B1	2	M1
hsa00071	Fatty acid degradation	2/238	44/8036	0.376161	0.660894	0.48395	ACSL1/ACSL3	2	M1
hsa03022	Basal transcription factors	2/238	45/8036	0.38679	0.670259	0.490807	CCNH/TAF13	2	M1
hsa04930	Type II diabetes mellitus	2/238	46/8036	0.397339	0.679235	0.49738	SOCS3/HK2	2	M1
hsa04330	Notch signaling pathway	2/238	53/8036	0.468611	0.759192	0.55593	NUMB/ADAM17	2	M1
hsa01212	Fatty acid metabolism	2/238	57/8036	0.507039	0.789559	0.578167	ACSL1/ACSL3	2	M1
hsa04730	Long-term depression	2/238	60/8036	0.534653	0.813823	0.595934	LYN/PRKCB	2	M1
hsa00561	Glycerolipid metabolism	2/238	61/8036	0.543621	0.813823	0.595934	GPAT3/GK	2	M1
hsa05217	Basal cell carcinoma	2/238	63/8036	0.561194	0.815989	0.59752	CTNNB1/CDKN1A	2	M1
hsa00970	Aminoacyl-tRNA biosynthesis	2/238	66/8036	0.58664	0.838531	0.614027	WARS/CARS2	2	M1
hsa05214	Glioma	2/238	75/8036	0.656365	0.888023	0.650268	CDKN1A/PRKCB	2	M1
hsa05204	Chemical carcinogenesis	2/238	82/8036	0.70387	0.917934	0.672171	PTGS2/CYP1B1	2	M1
hsa04911	Insulin secretion	2/238	86/8036	0.728491	0.924841	0.677229	PRKCB/ATP1B3	2	M1
hsa04260	Cardiac muscle contraction	2/238	87/8036	0.73437	0.924841	0.677229	TPM4/ATP1B3	2	M1
hsa04540	Gap junction	2/238	88/8036	0.74014	0.924841	0.677229	MAP3K2/PRKCB	2	M1
hsa04727	GABAergic synapse	2/238	89/8036	0.745804	0.924841	0.677229	GABARAPL1/PRKCB	2	M1
hsa04974	Protein digestion and absorption	2/238	95/8036	0.777609	0.924841	0.677229	SLC7A7/ATP1B3	2	M1
hsa01522	Endocrine resistance	2/238	98/8036	0.792172	0.932184	0.682606	HBEGF/CDKN1A	2	M1
hsa04916	Melanogenesis	2/238	101/8036	0.80589	0.943936	0.691212	CTNNB1/PRKCB	2	M1
hsa04725	Cholinergic synapse	2/238	113/8036	0.853046	0.970151	0.710408	FYN/PRKCB	2	M1
hsa01200	Carbon metabolism	2/238	117/8036	0.866292	0.971372	0.711302	TKT/HK2	2	M1
hsa05322	Systemic lupus erythematosus	2/238	136/8036	0.915478	0.985769	0.721845	H3F3A/CD86	2	M1
hsa04371	Apelin signaling pathway	2/238	137/8036	0.917528	0.985769	0.721845	GABARAPL1/PRKAG2	2	M1
hsa04915	Estrogen signaling pathway	2/238	138/8036	0.919532	0.985769	0.721845	HBEGF/RARA	2	M1
hsa04723	Retrograde endocannabinoid signaling	2/238	148/8036	0.937205	0.994491	0.728231	PTGS2/PRKCB	2	M1
hsa04934	Cushing syndrome	2/238	155/8036	0.947321	0.994491	0.728231	CTNNB1/CDKN1A	2	M1
hsa04310	Wnt signaling pathway	2/238	160/8036	0.953578	0.996923	0.730012	CTNNB1/PRKCB	2	M1
hsa04360	Axon guidance	2/238	181/8036	0.972924	0.998045	0.730834	ITGB1/FYN	2	M1
hsa05016	Huntington disease	2/238	306/8036	0.999097	0.999097	0.731604	SOD2/PPIF	2	M1
hsa00533	Glycosaminoglycan biosynthesis - keratan sulfate	1/238	14/8036	0.34377	0.625711	0.458187	B4GALT1	1	M1
hsa00531	Glycosaminoglycan degradation	1/238	19/8036	0.435531	0.72493	0.530841	HGSNAT	1	M1
hsa00770	Pantothenate and CoA biosynthesis	1/238	21/8036	0.46855	0.759192	0.55593	VNN2	1	M1
hsa00515	Mannose type O-glycan biosynthesis	1/238	23/8036	0.499645	0.787694	0.576801	B4GALT1	1	M1
hsa04964	Proximal tubule bicarbonate reclamation	1/238	23/8036	0.499645	0.787694	0.576801	ATP1B3	1	M1
hsa00790	Folate biosynthesis	1/238	26/8036	0.542924	0.813823	0.595934	GCH1	1	M1
hsa00601	Glycosphingolipid biosynthesis - lacto and neolacto series	1/238	27/8036	0.556505	0.815989	0.59752	B4GALT1	1	M1
hsa00030	Pentose phosphate pathway	1/238	30/8036	0.594884	0.845537	0.619157	TKT	1	M1
hsa03020	RNA polymerase	1/238	31/8036	0.606927	0.848356	0.621222	TWISTNB	1	M1
hsa04710	Circadian rhythm	1/238	31/8036	0.606927	0.848356	0.621222	PRKAG2	1	M1
hsa04136	Autophagy - other	1/238	32/8036	0.618613	0.859941	0.629705	GABARAPL1	1	M1
hsa04130	SNARE interactions in vesicular transport	1/238	33/8036	0.629954	0.87092	0.637745	STX11	1	M1
hsa00500	Starch and sucrose metabolism	1/238	36/8036	0.662	0.890883	0.652363	HK2	1	M1
hsa05340	Primary immunodeficiency	1/238	38/8036	0.681813	0.907888	0.664815	PTPRC	1	M1
hsa00513	Various types of N-glycan biosynthesis	1/238	39/8036	0.691282	0.910907	0.667026	B4GALT1	1	M1
hsa00514	Other types of O-glycan biosynthesis	1/238	47/8036	0.757593	0.924841	0.677229	B4GALT1	1	M1
hsa03420	Nucleotide excision repair	1/238	47/8036	0.757593	0.924841	0.677229	CCNH	1	M1
hsa00520	Amino sugar and nucleotide sugar metabolism	1/238	48/8036	0.764815	0.924841	0.677229	HK2	1	M1
hsa00565	Ether lipid metabolism	1/238	49/8036	0.771822	0.924841	0.677229	LPCAT1	1	M1
hsa05030	Cocaine addiction	1/238	49/8036	0.771822	0.924841	0.677229	NFKB1	1	M1
hsa00330	Arginine and proline metabolism	1/238	50/8036	0.778621	0.924841	0.677229	SAT1	1	M1
hsa00510	N-Glycan biosynthesis	1/238	50/8036	0.778621	0.924841	0.677229	B4GALT1	1	M1
hsa04979	Cholesterol metabolism	1/238	50/8036	0.778621	0.924841	0.677229	TSPO	1	M1
hsa04923	Regulation of lipolysis in adipocytes	1/238	56/8036	0.815382	0.947231	0.693624	PTGS2	1	M1
hsa00480	Glutathione metabolism	1/238	57/8036	0.820889	0.948333	0.694431	ANPEP	1	M1
hsa00140	Steroid hormone biosynthesis	1/238	61/8036	0.841325	0.965244	0.706815	CYP1B1	1	M1
hsa04929	GnRH secretion	1/238	64/8036	0.855113	0.970151	0.710408	PRKCB	1	M1
hsa00010	Glycolysis / Gluconeogenesis	1/238	67/8036	0.867708	0.971372	0.711302	HK2	1	M1
hsa04720	Long-term potentiation	1/238	67/8036	0.867708	0.971372	0.711302	PRKCB	1	M1
hsa05031	Amphetamine addiction	1/238	69/8036	0.875492	0.973372	0.712767	PRKCB	1	M1
hsa05218	Melanoma	1/238	72/8036	0.886322	0.979212	0.717043	CDKN1A	1	M1
hsa01230	Biosynthesis of amino acids	1/238	74/8036	0.893015	0.982317	0.719317	TKT	1	M1
hsa00980	Metabolism of xenobiotics by cytochrome P450	1/238	76/8036	0.899316	0.984965	0.721256	CYP1B1	1	M1
hsa03018	RNA degradation	1/238	79/8036	0.908081	0.985769	0.721845	BTG1	1	M1
hsa04070	Phosphatidylinositol signaling system	1/238	97/8036	0.946819	0.994491	0.728231	PRKCB	1	M1
hsa04713	Circadian entrainment	1/238	97/8036	0.946819	0.994491	0.728231	PRKCB	1	M1
hsa04922	Glucagon signaling pathway	1/238	106/8036	0.959568	0.998045	0.730834	PRKAG2	1	M1
hsa04724	Glutamatergic synapse	1/238	114/8036	0.968318	0.998045	0.730834	PRKCB	1	M1
hsa04728	Dopaminergic synapse	1/238	132/8036	0.981715	0.998045	0.730834	PRKCB	1	M1
hsa05017	Spinocerebellar ataxia	1/238	133/8036	0.982266	0.998045	0.730834	PRKCB	1	M1
hsa03040	Spliceosome	1/238	149/8036	0.989132	0.999097	0.731604	DDX5	1	M1
hsa03013	RNA transport	1/238	180/8036	0.995804	0.999097	0.731604	RANBP2	1	M1
hsa05034	Alcoholism	1/238	187/8036	0.996617	0.999097	0.731604	H3F3A	1	M1
hsa04145	Phagosome	14/133	152/8036	1.82e-07	2.09e-05	1.73e-05	MRC1/COLEC12/HLA-DPB1/CD209/HLA-DPA1/HLA-DRA/ITGB5/FCGR3A/MSR1/CD36/CTSL/HLA-DQA1/ATP6V1D/HLA-DMA	14	M2
hsa05150	Staphylococcus aureus infection	12/133	96/8036	4.91e-08	1.13e-05	9.35e-06	C1QB/C1QA/C1QC/HLA-DPB1/HLA-DPA1/HLA-DRA/FCGR3A/FPR3/C2/DEFA3/HLA-DQA1/HLA-DMA	12	M2
hsa05152	Tuberculosis	12/133	180/8036	4.01e-05	0.00131703	0.00109099	MRC1/HLA-DPB1/CD209/HLA-DPA1/HLA-DRA/FCGR3A/CD74/BAX/CALM2/HLA-DQA1/HLA-DMA/CALM3	12	M2
hsa05163	Human cytomegalovirus infection	12/133	225/8036	0.000334543	0.00512967	0.00424929	CXCL12/CCL2/B2M/CCND1/CCL4L2/CCL3/CCL4/BAX/CALM2/NFATC2/CALM3/GNA13	12	M2
hsa05323	Rheumatoid arthritis	11/133	93/8036	3.24e-07	2.48e-05	2.06e-05	CXCL12/CCL2/HLA-DPB1/HLA-DPA1/HLA-DRA/CCL3/CTSL/HLA-DQA1/ACP5/ATP6V1D/HLA-DMA	11	M2
hsa05166	Human T-cell leukemia virus 1 infection	11/133	219/8036	0.000978952	0.00978952	0.00810939	NRP1/HLA-DPB1/B2M/HLA-DPA1/CCND1/HLA-DRA/BAX/EGR2/HLA-DQA1/NFATC2/HLA-DMA	11	M2
hsa05322	Systemic lupus erythematosus	10/133	136/8036	7.97e-05	0.00183325	0.00151862	C1QB/C1QA/C1QC/HLA-DPB1/HLA-DPA1/HLA-DRA/FCGR3A/C2/HLA-DQA1/HLA-DMA	10	M2
hsa05418	Fluid shear stress and atherosclerosis	10/133	139/8036	9.58e-05	0.0020027	0.00165899	VCAM1/CCL2/HMOX1/PDGFB/CTSL/TXN/KLF2/CALM2/MGST3/CALM3	10	M2
hsa05169	Epstein-Barr virus infection	10/133	202/8036	0.00185467	0.0147095	0.0121849	HLA-DPB1/B2M/HLA-DPA1/CCND1/HLA-DRA/BAX/HLA-DQA1/GADD45B/HES1/HLA-DMA	10	M2
hsa05168	Herpes simplex virus 1 infection	10/133	491/8036	0.294586	0.60776	0.503453	CCL2/HLA-DPB1/B2M/HLA-DPA1/HLA-DRA/CD74/BAX/HLA-DQA1/HLA-DMA/BST2	10	M2
hsa04612	Antigen processing and presentation	9/133	78/8036	4.93e-06	0.000283606	0.000234932	LGMN/HLA-DPB1/B2M/HLA-DPA1/HLA-DRA/CD74/CTSL/HLA-DQA1/HLA-DMA	9	M2
hsa05133	Pertussis	8/133	76/8036	3.34e-05	0.00128019	0.00106048	C1QB/C1QA/C1QC/C2/CALM2/CALM3/SERPING1/LY96	8	M2
hsa04610	Complement and coagulation cascades	8/133	85/8036	7.52e-05	0.00183325	0.00151862	C1QB/C1QA/C1QC/A2M/VSIG4/C2/CD59/SERPING1	8	M2
hsa04514	Cell adhesion molecules (CAMs)	8/133	148/8036	0.00308749	0.0216216	0.0179108	VCAM1/SDC3/HLA-DPB1/HLA-DPA1/HLA-DRA/SIGLEC1/HLA-DQA1/HLA-DMA	8	M2
hsa04014	Ras signaling pathway	8/133	232/8036	0.0384058	0.187943	0.155687	IGF1/RGL1/PDGFB/FGFR1/CALM2/VEGFB/CALM3/RAP1A	8	M2
hsa05144	Malaria	7/133	50/8036	1.6e-05	0.000737564	0.000610979	HBB/VCAM1/CCL2/CD36/HBA2/HBA1/GYPC	7	M2
hsa04978	Mineral absorption	7/133	59/8036	4.84e-05	0.00139125	0.00115248	SLC40A1/FTL/HMOX1/ATP1B1/ATOX1/MT2A/FTH1	7	M2
hsa05214	Glioma	7/133	75/8036	0.000226057	0.0037138	0.00307642	IGF1/CCND1/PDGFB/BAX/CALM2/GADD45B/CALM3	7	M2
hsa04658	Th1 and Th2 cell differentiation	7/133	92/8036	0.000790696	0.00826637	0.00684766	MAF/HLA-DPB1/HLA-DPA1/HLA-DRA/HLA-DQA1/NFATC2/HLA-DMA	7	M2
hsa04640	Hematopoietic cell lineage	7/133	99/8036	0.00122117	0.0112348	0.00930661	HLA-DPB1/HLA-DPA1/HLA-DRA/CD36/CD59/HLA-DQA1/HLA-DMA	7	M2
hsa05164	Influenza A	7/133	171/8036	0.0231683	0.129968	0.107663	CCL2/HLA-DPB1/HLA-DPA1/HLA-DRA/BAX/HLA-DQA1/HLA-DMA	7	M2
hsa04062	Chemokine signaling pathway	7/133	189/8036	0.0371163	0.185582	0.153731	CXCL12/CCL2/CCL8/CCL4L2/CCL3/CCL4/RAP1A	7	M2
hsa04510	Focal adhesion	7/133	201/8036	0.0489858	0.229933	0.190471	IGF1/CCND1/ITGB5/PDGFB/VEGFB/ARHGAP5/RAP1A	7	M2
hsa04015	Rap1 signaling pathway	7/133	210/8036	0.0593184	0.269233	0.223026	IGF1/PDGFB/FGFR1/CALM2/VEGFB/CALM3/RAP1A	7	M2
hsa04810	Regulation of actin cytoskeleton	7/133	214/8036	0.0643131	0.279094	0.231195	CXCL12/TMSB4X/ITGB5/PDGFB/FGFR1/GSN/GNA13	7	M2
hsa05012	Parkinson disease	7/133	249/8036	0.118628	0.395425	0.32756	BAX/TXN/UQCR10/CALM2/NDUFV2/NDUFB4/CALM3	7	M2
hsa04151	PI3K-Akt signaling pathway	7/133	354/8036	0.370242	0.68674	0.568878	IGF1/CCND1/ITGB5/PDGFB/FGFR1/VEGFB/EIF4E	7	M2
hsa04672	Intestinal immune network for IgA production	6/133	49/8036	0.000143143	0.00253252	0.00209788	CXCL12/HLA-DPB1/HLA-DPA1/HLA-DRA/HLA-DQA1/HLA-DMA	6	M2
hsa05416	Viral myocarditis	6/133	60/8036	0.000441662	0.00597543	0.0049499	HLA-DPB1/HLA-DPA1/CCND1/HLA-DRA/HLA-DQA1/HLA-DMA	6	M2
hsa05321	Inflammatory bowel disease (IBD)	6/133	65/8036	0.000681146	0.00746017	0.00617982	MAF/HLA-DPB1/HLA-DPA1/HLA-DRA/HLA-DQA1/HLA-DMA	6	M2
hsa05218	Melanoma	6/133	72/8036	0.00117245	0.0112348	0.00930661	IGF1/CCND1/PDGFB/BAX/FGFR1/GADD45B	6	M2
hsa05140	Leishmaniasis	6/133	77/8036	0.00166345	0.0141702	0.0117382	HLA-DPB1/HLA-DPA1/HLA-DRA/FCGR3A/HLA-DQA1/HLA-DMA	6	M2
hsa04061	Viral protein interaction with cytokine and cytokine receptor	6/133	100/8036	0.00614441	0.0415651	0.0344315	CXCL12/CCL2/CCL8/CCL4L2/CCL3/CCL4	6	M2
hsa04064	NF-kappa B signaling pathway	6/133	104/8036	0.00741441	0.0473698	0.03924	CXCL12/VCAM1/CCL4L2/CCL4/GADD45B/LY96	6	M2
hsa04659	Th17 cell differentiation	6/133	107/8036	0.00848425	0.05274	0.0436885	HLA-DPB1/HLA-DPA1/HLA-DRA/HLA-DQA1/NFATC2/HLA-DMA	6	M2
hsa05145	Toxoplasmosis	6/133	112/8036	0.0105073	0.0619659	0.051331	HLA-DPB1/HLA-DPA1/HLA-DRA/HLA-DQA1/HLA-DMA/LY96	6	M2
hsa04142	Lysosome	6/133	128/8036	0.0192583	0.110735	0.0917302	LGMN/NPC2/CTSL/FUCA1/CD68/ACP5	6	M2
hsa05224	Breast cancer	6/133	147/8036	0.0349131	0.178445	0.147819	IGF1/CCND1/BAX/FGFR1/GADD45B/HES1	6	M2
hsa04218	Cellular senescence	6/133	156/8036	0.0445704	0.213567	0.176913	CCND1/ZFP36L1/CALM2/NFATC2/GADD45B/CALM3	6	M2
hsa05167	Kaposi sarcoma-associated herpesvirus infection	6/133	189/8036	0.0932123	0.3468	0.28728	CCND1/PDGFB/BAX/CALM2/NFATC2/CALM3	6	M2
hsa05202	Transcriptional misregulation in cancer	6/133	192/8036	0.0986673	0.356102	0.294986	IGF1/MAF/BAX/DEFA3/GADD45B/NR4A3	6	M2
hsa05170	Human immunodeficiency virus 1 infection	6/133	212/8036	0.13919	0.410431	0.339991	B2M/BAX/CALM2/NFATC2/CALM3/BST2	6	M2
hsa04714	Thermogenesis	6/133	231/8036	0.183785	0.48587	0.402482	MGLL/NDUFAF3/FGFR1/UQCR10/NDUFV2/NDUFB4	6	M2
hsa04144	Endocytosis	6/133	248/8036	0.227875	0.547118	0.453219	DAB2/FOLR2/SMAP2/WWP1/RAB8A/CHMP3	6	M2
hsa04010	MAPK signaling pathway	6/133	294/8036	0.359793	0.683147	0.565902	IGF1/PDGFB/FGFR1/VEGFB/GADD45B/RAP1A	6	M2
hsa04060	Cytokine-cytokine receptor interaction	6/133	294/8036	0.359793	0.683147	0.565902	CXCL12/CCL2/CCL8/CCL4L2/CCL3/CCL4	6	M2
hsa05010	Alzheimer disease	6/133	369/8036	0.576917	0.757937	0.627856	APOE/UQCR10/CALM2/NDUFV2/NDUFB4/CALM3	6	M2
hsa05310	Asthma	5/133	31/8036	0.000138472	0.00253252	0.00209788	HLA-DPB1/HLA-DPA1/HLA-DRA/HLA-DQA1/HLA-DMA	5	M2
hsa05330	Allograft rejection	5/133	38/8036	0.000372817	0.00535924	0.00443946	HLA-DPB1/HLA-DPA1/HLA-DRA/HLA-DQA1/HLA-DMA	5	M2
hsa04216	Ferroptosis	5/133	41/8036	0.000534948	0.00683545	0.00566232	SLC40A1/FTL/HMOX1/FTH1/NCOA4	5	M2
hsa05332	Graft-versus-host disease	5/133	42/8036	0.000599261	0.00725421	0.00600921	HLA-DPB1/HLA-DPA1/HLA-DRA/HLA-DQA1/HLA-DMA	5	M2
hsa04940	Type I diabetes mellitus	5/133	43/8036	0.000669205	0.00746017	0.00617982	HLA-DPB1/HLA-DPA1/HLA-DRA/HLA-DQA1/HLA-DMA	5	M2
hsa04979	Cholesterol metabolism	5/133	50/8036	0.00134294	0.0118799	0.00984098	APOE/APOC1/PLTP/NPC2/CD36	5	M2
hsa05320	Autoimmune thyroid disease	5/133	53/8036	0.00174838	0.0143617	0.0118969	HLA-DPB1/HLA-DPA1/HLA-DRA/HLA-DQA1/HLA-DMA	5	M2
hsa04115	p53 signaling pathway	5/133	73/8036	0.00703819	0.0462509	0.0383131	IGF1/CCND1/BAX/GADD45B/SESN1	5	M2
hsa01521	EGFR tyrosine kinase inhibitor resistance	5/133	79/8036	0.0097644	0.0591003	0.0489573	IGF1/AXL/PDGFB/BAX/EIF4E	5	M2
hsa04933	AGE-RAGE signaling pathway in diabetic complications	5/133	100/8036	0.0248287	0.135966	0.112631	VCAM1/CCL2/CCND1/BAX/VEGFB	5	M2
hsa05142	Chagas disease (American trypanosomiasis)	5/133	102/8036	0.0267669	0.143172	0.1186	C1QB/C1QA/C1QC/CCL2/CCL3	5	M2
hsa04625	C-type lectin receptor signaling pathway	5/133	104/8036	0.0287995	0.150543	0.124706	CD209/CALM2/EGR2/NFATC2/CALM3	5	M2
hsa04380	Osteoclast differentiation	5/133	128/8036	0.06087	0.269233	0.223026	LILRB5/FCGR3A/NFATC2/ACP5/FOSB	5	M2
hsa04371	Apelin signaling pathway	5/133	137/8036	0.0766316	0.302956	0.250962	CCND1/KLF2/CALM2/CALM3/GNA13	5	M2
hsa04022	cGMP-PKG signaling pathway	5/133	167/8036	0.143131	0.411502	0.340878	ATP1B1/CALM2/NFATC2/CALM3/GNA13	5	M2
hsa05225	Hepatocellular carcinoma	5/133	168/8036	0.145686	0.413678	0.34268	CCND1/HMOX1/BAX/MGST3/GADD45B	5	M2
hsa05205	Proteoglycans in cancer	5/133	205/8036	0.252017	0.573901	0.475405	IGF1/CCND1/ITGB5/CTSL/FGFR1	5	M2
hsa05165	Human papillomavirus infection	5/133	331/8036	0.645877	0.774454	0.641539	CCND1/ITGB5/BAX/ATP6V1D/HES1	5	M2
hsa05020	Prion diseases	4/133	35/8036	0.0025229	0.0193423	0.0160226	C1QB/C1QA/C1QC/BAX	4	M2
hsa05143	African trypanosomiasis	4/133	37/8036	0.00310223	0.0216216	0.0179108	HBB/VCAM1/HBA2/HBA1	4	M2
hsa05216	Thyroid cancer	4/133	37/8036	0.00310223	0.0216216	0.0179108	CCND1/BAX/GADD45B/NCOA4	4	M2
hsa04211	Longevity regulating pathway	4/133	89/8036	0.0597025	0.269233	0.223026	IGF1/BAX/EIF4E/SESN1	4	M2
hsa04970	Salivary secretion	4/133	93/8036	0.0679527	0.284339	0.235539	CST3/ATP1B1/CALM2/CALM3	4	M2
hsa05215	Prostate cancer	4/133	97/8036	0.076763	0.302956	0.250962	IGF1/CCND1/PDGFB/FGFR1	4	M2
hsa04620	Toll-like receptor signaling pathway	4/133	104/8036	0.0934852	0.3468	0.28728	CCL4L2/CCL3/CCL4/LY96	4	M2
hsa04670	Leukocyte transendothelial migration	4/133	113/8036	0.117288	0.395425	0.32756	CXCL12/VCAM1/ARHGAP5/RAP1A	4	M2
hsa04722	Neurotrophin signaling pathway	4/133	119/8036	0.134485	0.408033	0.338005	BAX/CALM2/CALM3/RAP1A	4	M2
hsa04152	AMPK signaling pathway	4/133	120/8036	0.137447	0.410431	0.339991	IGF1/CCND1/CD36/RAB8A	4	M2
hsa04068	FoxO signaling pathway	4/133	131/8036	0.171687	0.464566	0.384835	IGF1/CCND1/KLF2/GADD45B	4	M2
hsa00190	Oxidative phosphorylation	4/133	133/8036	0.178213	0.476615	0.394816	UQCR10/NDUFV2/NDUFB4/ATP6V1D	4	M2
hsa04210	Apoptosis	4/133	136/8036	0.188156	0.486246	0.402794	BAX/CTSL/GADD45B/LMNA	4	M2
hsa04261	Adrenergic signaling in cardiomyocytes	4/133	149/8036	0.23312	0.547118	0.453219	SCN1B/ATP1B1/CALM2/CALM3	4	M2
hsa04932	Non-alcoholic fatty liver disease (NAFLD)	4/133	149/8036	0.23312	0.547118	0.453219	BAX/UQCR10/NDUFV2/NDUFB4	4	M2
hsa04921	Oxytocin signaling pathway	4/133	154/8036	0.251084	0.573901	0.475405	CCND1/CALM2/NFATC2/CALM3	4	M2
hsa04217	Necroptosis	4/133	159/8036	0.269336	0.584998	0.484598	FTL/BAX/FTH1/CHMP3	4	M2
hsa05203	Viral carcinogenesis	4/133	204/8036	0.438161	0.729496	0.604297	CCND1/BAX/EGR2/GSN	4	M2
hsa05132	Salmonella infection	4/133	213/8036	0.47123	0.729496	0.604297	BAX/TXN/DYNLRB1/LY96	4	M2
hsa04024	cAMP signaling pathway	4/133	216/8036	0.482102	0.729496	0.604297	ATP1B1/CALM2/CALM3/RAP1A	4	M2
hsa05016	Huntington disease	4/133	306/8036	0.751714	0.817582	0.677265	BAX/UQCR10/NDUFV2/NDUFB4	4	M2
hsa05206	MicroRNAs in cancer	4/133	310/8036	0.76075	0.820878	0.679995	CCND1/HMOX1/FSCN1/PDGFB	4	M2
hsa00480	Glutathione metabolism	3/133	57/8036	0.067994	0.284339	0.235539	HPGDS/MGST3/LAP3	3	M2
hsa05213	Endometrial cancer	3/133	58/8036	0.0708696	0.291072	0.241116	CCND1/BAX/GADD45B	3	M2
hsa04720	Long-term potentiation	3/133	67/8036	0.0990892	0.356102	0.294986	CALM2/CALM3/RAP1A	3	M2
hsa05223	Non-small cell lung cancer	3/133	68/8036	0.102469	0.358908	0.29731	CCND1/BAX/GADD45B	3	M2
hsa05031	Amphetamine addiction	3/133	69/8036	0.105894	0.363518	0.301129	CALM2/CALM3/FOSB	3	M2
hsa00980	Metabolism of xenobiotics by cytochrome P450	3/133	76/8036	0.131072	0.407384	0.337467	HPGDS/MGST3/EPHX1	3	M2
hsa04971	Gastric acid secretion	3/133	76/8036	0.131072	0.407384	0.337467	ATP1B1/CALM2/CALM3	3	M2
hsa05212	Pancreatic cancer	3/133	76/8036	0.131072	0.407384	0.337467	CCND1/BAX/GADD45B	3	M2
hsa05220	Chronic myeloid leukemia	3/133	76/8036	0.131072	0.407384	0.337467	CCND1/BAX/GADD45B	3	M2
hsa03320	PPAR signaling pathway	3/133	77/8036	0.134828	0.408033	0.338005	PLTP/ME1/CD36	3	M2
hsa05204	Chemical carcinogenesis	3/133	82/8036	0.154151	0.427166	0.353854	HPGDS/MGST3/EPHX1	3	M2
hsa05210	Colorectal cancer	3/133	86/8036	0.170199	0.464566	0.384835	CCND1/BAX/GADD45B	3	M2
hsa05410	Hypertrophic cardiomyopathy (HCM)	3/133	90/8036	0.186706	0.486246	0.402794	IGF1/ITGB5/LMNA	3	M2
hsa05222	Small cell lung cancer	3/133	92/8036	0.195113	0.498621	0.413046	CCND1/BAX/GADD45B	3	M2
hsa05414	Dilated cardiomyopathy (DCM)	3/133	96/8036	0.212197	0.530493	0.439448	IGF1/ITGB5/LMNA	3	M2
hsa01522	Endocrine resistance	3/133	98/8036	0.220861	0.540404	0.447657	IGF1/CCND1/BAX	3	M2
hsa04925	Aldosterone synthesis and secretion	3/133	98/8036	0.220861	0.540404	0.447657	ATP1B1/CALM2/CALM3	3	M2
hsa04750	Inflammatory mediator regulation of TRP channels	3/133	100/8036	0.229596	0.547118	0.453219	IGF1/CALM2/CALM3	3	M2
hsa04972	Pancreatic secretion	3/133	102/8036	0.238395	0.553848	0.458794	ATP1B1/RAB8A/RAP1A	3	M2
hsa04066	HIF-1 signaling pathway	3/133	109/8036	0.269608	0.584998	0.484598	IGF1/HMOX1/EIF4E	3	M2
hsa04114	Oocyte meiosis	3/133	128/8036	0.355833	0.683147	0.565902	IGF1/CALM2/CALM3	3	M2
hsa04270	Vascular smooth muscle contraction	3/133	135/8036	0.387487	0.712409	0.590142	CALM2/CALM3/GNA13	3	M2
hsa04910	Insulin signaling pathway	3/133	137/8036	0.396471	0.712409	0.590142	CALM2/CALM3/EIF4E	3	M2
hsa05162	Measles	3/133	139/8036	0.405422	0.722845	0.598787	CD209/CCND1/BAX	3	M2
hsa04550	Signaling pathways regulating pluripotency of stem cells	3/133	143/8036	0.423206	0.729496	0.604297	IGF1/FGFR1/KLF4	3	M2
hsa04723	Retrograde endocannabinoid signaling	3/133	148/8036	0.445183	0.729496	0.604297	MGLL/NDUFV2/NDUFB4	3	M2
hsa05226	Gastric cancer	3/133	149/8036	0.449541	0.729496	0.604297	CCND1/BAX/GADD45B	3	M2
hsa04150	mTOR signaling pathway	3/133	155/8036	0.475389	0.729496	0.604297	IGF1/ATP6V1D/EIF4E	3	M2
hsa04934	Cushing syndrome	3/133	155/8036	0.475389	0.729496	0.604297	CCND1/AIP/RAP1A	3	M2
hsa05160	Hepatitis C	3/133	156/8036	0.479645	0.729496	0.604297	CCND1/BAX/IFIT1	3	M2
hsa04310	Wnt signaling pathway	3/133	160/8036	0.496506	0.738593	0.611832	CCND1/NFATC2/CACYBP	3	M2
hsa04530	Tight junction	3/133	161/8036	0.500679	0.738593	0.611832	CCND1/RAB8A/RAP1A	3	M2
hsa05161	Hepatitis B	3/133	162/8036	0.504836	0.739568	0.61264	BAX/EGR2/NFATC2	3	M2
hsa04360	Axon guidance	3/133	181/8036	0.580223	0.757937	0.627856	CXCL12/NRP1/NFATC2	3	M2
hsa04621	NOD-like receptor signaling pathway	3/133	181/8036	0.580223	0.757937	0.627856	CCL2/TXN/DEFA3	3	M2
hsa05034	Alcoholism	3/133	187/8036	0.602501	0.760541	0.630013	CALM2/CALM3/FOSB	3	M2
hsa04020	Calcium signaling pathway	3/133	201/8036	0.651421	0.776305	0.643072	PDGFB/CALM2/CALM3	3	M2
hsa04744	Phototransduction	2/133	28/8036	0.0777149	0.302956	0.250962	CALM2/CALM3	2	M2
hsa01523	Antifolate resistance	2/133	31/8036	0.092627	0.3468	0.28728	FOLR2/SHMT1	2	M2
hsa04130	SNARE interactions in vesicular transport	2/133	33/8036	0.102991	0.358908	0.29731	VTI1B/STX4	2	M2
hsa04960	Aldosterone-regulated sodium reabsorption	2/133	37/8036	0.124589	0.407384	0.337467	IGF1/ATP1B1	2	M2
hsa00260	Glycine, serine and threonine metabolism	2/133	40/8036	0.141433	0.411502	0.340878	GATM/SHMT1	2	M2
hsa00860	Porphyrin and chlorophyll metabolism	2/133	42/8036	0.152919	0.427166	0.353854	HMOX1/BLVRB	2	M2
hsa00330	Arginine and proline metabolism	2/133	50/8036	0.200385	0.506468	0.419546	GATM/LAP3	2	M2
hsa04730	Long-term depression	2/133	60/8036	0.261613	0.584184	0.483924	IGF1/GNA13	2	M2
hsa00561	Glycerolipid metabolism	2/133	61/8036	0.267776	0.584998	0.484598	MGLL/AKR1A1	2	M2
hsa00590	Arachidonic acid metabolism	2/133	63/8036	0.280098	0.591033	0.489597	HPGDS/LTC4S	2	M2
hsa04623	Cytosolic DNA-sensing pathway	2/133	63/8036	0.280098	0.591033	0.489597	CCL4L2/CCL4	2	M2
hsa05217	Basal cell carcinoma	2/133	63/8036	0.280098	0.591033	0.489597	BAX/GADD45B	2	M2
hsa04924	Renin secretion	2/133	69/8036	0.316935	0.638252	0.528712	CALM2/CALM3	2	M2
hsa05211	Renal cell carcinoma	2/133	69/8036	0.316935	0.638252	0.528712	PDGFB/RAP1A	2	M2
hsa00982	Drug metabolism - cytochrome P450	2/133	71/8036	0.329132	0.652588	0.540588	HPGDS/MGST3	2	M2
hsa01524	Platinum drug resistance	2/133	73/8036	0.34127	0.670872	0.555734	BAX/MGST3	2	M2
hsa05412	Arrhythmogenic right ventricular cardiomyopathy (ARVC)	2/133	77/8036	0.365335	0.683147	0.565902	ITGB5/LMNA	2	M2
hsa04662	B cell receptor signaling pathway	2/133	82/8036	0.394937	0.712409	0.590142	LILRB5/NFATC2	2	M2
hsa04260	Cardiac muscle contraction	2/133	87/8036	0.423905	0.729496	0.604297	ATP1B1/UQCR10	2	M2
hsa04512	ECM-receptor interaction	2/133	88/8036	0.429614	0.729496	0.604297	ITGB5/CD36	2	M2
hsa04976	Bile secretion	2/133	90/8036	0.440944	0.729496	0.604297	ATP1B1/EPHX1	2	M2
hsa04666	Fc gamma R-mediated phagocytosis	2/133	93/8036	0.457707	0.729496	0.604297	FCGR3A/GSN	2	M2
hsa04912	GnRH signaling pathway	2/133	93/8036	0.457707	0.729496	0.604297	CALM2/CALM3	2	M2
hsa04657	IL-17 signaling pathway	2/133	94/8036	0.46323	0.729496	0.604297	CCL2/FOSB	2	M2
hsa04974	Protein digestion and absorption	2/133	95/8036	0.468721	0.729496	0.604297	SLC7A8/ATP1B1	2	M2
hsa04070	Phosphatidylinositol signaling system	2/133	97/8036	0.479604	0.729496	0.604297	CALM2/CALM3	2	M2
hsa04713	Circadian entrainment	2/133	97/8036	0.479604	0.729496	0.604297	CALM2/CALM3	2	M2
hsa04916	Melanogenesis	2/133	101/8036	0.500959	0.738593	0.611832	CALM2/CALM3	2	M2
hsa04922	Glucagon signaling pathway	2/133	106/8036	0.526857	0.752652	0.623479	CALM2/CALM3	2	M2
hsa04928	Parathyroid hormone synthesis, secretion and action	2/133	106/8036	0.526857	0.752652	0.623479	FGFR1/GNA13	2	M2
hsa03008	Ribosome biogenesis in eukaryotes	2/133	112/8036	0.556728	0.757937	0.627856	NOP10/SBDS	2	M2
hsa04668	TNF signaling pathway	2/133	112/8036	0.556728	0.757937	0.627856	VCAM1/CCL2	2	M2
hsa01200	Carbon metabolism	2/133	117/8036	0.580592	0.757937	0.627856	ME1/SHMT1	2	M2
hsa04071	Sphingolipid signaling pathway	2/133	119/8036	0.589872	0.757937	0.627856	BAX/GNA13	2	M2
hsa04919	Thyroid hormone signaling pathway	2/133	121/8036	0.599002	0.760541	0.630013	CCND1/ATP1B1	2	M2
hsa04110	Cell cycle	2/133	124/8036	0.61241	0.760541	0.630013	CCND1/GADD45B	2	M2
hsa04611	Platelet activation	2/133	124/8036	0.61241	0.760541	0.630013	RAP1A/GNA13	2	M2
hsa05135	Yersinia infection	2/133	130/8036	0.638205	0.774454	0.641539	CCL2/NFATC2	2	M2
hsa04650	Natural killer cell mediated cytotoxicity	2/133	131/8036	0.642372	0.774454	0.641539	FCGR3A/NFATC2	2	M2
hsa04728	Dopaminergic synapse	2/133	132/8036	0.646501	0.774454	0.641539	CALM2/CALM3	2	M2
hsa04140	Autophagy - animal	2/133	137/8036	0.666589	0.782522	0.648222	CTSL/RAB8A	2	M2
hsa04915	Estrogen signaling pathway	2/133	138/8036	0.670495	0.782522	0.648222	CALM2/CALM3	2	M2
hsa04072	Phospholipase D signaling pathway	2/133	148/8036	0.707563	0.793625	0.657419	PDGFB/GNA13	2	M2
hsa03010	Ribosome	2/133	158/8036	0.741116	0.811699	0.672391	RPS27L/MRPL34	2	M2
hsa04630	JAK-STAT signaling pathway	2/133	162/8036	0.753597	0.817582	0.677265	CCND1/PDGFB	2	M2
hsa04141	Protein processing in endoplasmic reticulum	2/133	167/8036	0.768472	0.821624	0.680613	BAX/MAN1A1	2	M2
hsa03013	RNA transport	2/133	180/8036	0.803566	0.84716	0.701767	EIF3D/EIF4E	2	M2
hsa05130	Pathogenic Escherichia coli infection	2/133	192/8036	0.831715	0.861687	0.7138	BAX/GNA13	2	M2
hsa05131	Shigellosis	2/133	242/8036	0.913902	0.92598	0.767059	BAX/FNBP1	2	M2
hsa04740	Olfactory transduction	2/133	448/8036	0.995906	0.99702	0.825907	CALM2/CALM3	2	M2
hsa00511	Other glycan degradation	1/133	18/8036	0.259717	0.584184	0.483924	FUCA1	1	M2
hsa00670	One carbon pool by folate	1/133	20/8036	0.284074	0.593973	0.492033	SHMT1	1	M2
hsa00770	Pantothenate and CoA biosynthesis	1/133	21/8036	0.295953	0.60776	0.503453	PPCS	1	M2
hsa04964	Proximal tubule bicarbonate reclamation	1/133	23/8036	0.319126	0.638252	0.528712	ATP1B1	1	M2
hsa04950	Maturity onset diabetes of the young	1/133	26/8036	0.352474	0.683147	0.565902	HES1	1	M2
hsa04966	Collecting duct acid secretion	1/133	27/8036	0.363226	0.683147	0.565902	ATP6V1D	1	M2
hsa00630	Glyoxylate and dicarboxylate metabolism	1/133	30/8036	0.394429	0.712409	0.590142	SHMT1	1	M2
hsa04215	Apoptosis - multiple species	1/133	32/8036	0.414383	0.729496	0.604297	BAX	1	M2
hsa00040	Pentose and glucuronate interconversions	1/133	34/8036	0.433685	0.729496	0.604297	AKR1A1	1	M2
hsa00760	Nicotinate and nicotinamide metabolism	1/133	35/8036	0.443098	0.729496	0.604297	QPRT	1	M2
hsa00513	Various types of N-glycan biosynthesis	1/133	39/8036	0.47922	0.729496	0.604297	MAN1A1	1	M2
hsa00620	Pyruvate metabolism	1/133	39/8036	0.47922	0.729496	0.604297	ME1	1	M2
hsa05219	Bladder cancer	1/133	41/8036	0.4964	0.738593	0.611832	CCND1	1	M2
hsa04975	Fat digestion and absorption	1/133	43/8036	0.513017	0.746796	0.618628	CD36	1	M2
hsa04962	Vasopressin-regulated water reabsorption	1/133	44/8036	0.52112	0.752652	0.623479	STX4	1	M2
hsa03050	Proteasome	1/133	46/8036	0.536927	0.757937	0.627856	POMP	1	M2
hsa04973	Carbohydrate digestion and absorption	1/133	47/8036	0.544635	0.757937	0.627856	ATP1B1	1	M2
hsa00520	Amino sugar and nucleotide sugar metabolism	1/133	48/8036	0.552216	0.757937	0.627856	NPL	1	M2
hsa00565	Ether lipid metabolism	1/133	49/8036	0.559672	0.757937	0.627856	PLA2G7	1	M2
hsa05030	Cocaine addiction	1/133	49/8036	0.559672	0.757937	0.627856	FOSB	1	M2
hsa00510	N-Glycan biosynthesis	1/133	50/8036	0.567004	0.757937	0.627856	MAN1A1	1	M2
hsa04340	Hedgehog signaling pathway	1/133	50/8036	0.567004	0.757937	0.627856	CCND1	1	M2
hsa05110	Vibrio cholerae infection	1/133	50/8036	0.567004	0.757937	0.627856	ATP6V1D	1	M2
hsa04913	Ovarian steroidogenesis	1/133	51/8036	0.574215	0.757937	0.627856	IGF1	1	M2
hsa04330	Notch signaling pathway	1/133	53/8036	0.588282	0.757937	0.627856	HES1	1	M2
hsa04961	Endocrine and other factor-regulated calcium reabsorption	1/133	53/8036	0.588282	0.757937	0.627856	ATP1B1	1	M2
hsa03460	Fanconi anemia pathway	1/133	54/8036	0.595141	0.760458	0.629945	HES1	1	M2
hsa04923	Regulation of lipolysis in adipocytes	1/133	56/8036	0.608522	0.760541	0.630013	MGLL	1	M2
hsa05014	Amyotrophic lateral sclerosis (ALS)	1/133	57/8036	0.615046	0.760541	0.630013	BAX	1	M2
hsa04370	VEGF signaling pathway	1/133	59/8036	0.627773	0.772128	0.639612	NFATC2	1	M2
hsa04213	Longevity regulating pathway - multiple species	1/133	62/8036	0.646085	0.774454	0.641539	IGF1	1	M2
hsa00010	Glycolysis / Gluconeogenesis	1/133	67/8036	0.674639	0.782522	0.648222	AKR1A1	1	M2
hsa05221	Acute myeloid leukemia	1/133	67/8036	0.674639	0.782522	0.648222	CCND1	1	M2
hsa00830	Retinol metabolism	1/133	68/8036	0.680069	0.782522	0.648222	DHRS3	1	M2
hsa04137	Mitophagy - animal	1/133	68/8036	0.680069	0.782522	0.648222	BNIP3L	1	M2
hsa04920	Adipocytokine signaling pathway	1/133	69/8036	0.685409	0.782522	0.648222	CD36	1	M2
hsa04917	Prolactin signaling pathway	1/133	70/8036	0.690661	0.782522	0.648222	CCND1	1	M2
hsa05120	Epithelial cell signaling in Helicobacter pylori infection	1/133	70/8036	0.690661	0.782522	0.648222	ATP6V1D	1	M2
hsa05230	Central carbon metabolism in cancer	1/133	70/8036	0.690661	0.782522	0.648222	FGFR1	1	M2
hsa04520	Adherens junction	1/133	71/8036	0.695826	0.78451	0.649868	FGFR1	1	M2
hsa01230	Biosynthesis of amino acids	1/133	74/8036	0.710812	0.793625	0.657419	SHMT1	1	M2
hsa04918	Thyroid hormone synthesis	1/133	75/8036	0.715643	0.795159	0.65869	ATP1B1	1	M2
hsa04721	Synaptic vesicle cycle	1/133	78/8036	0.729659	0.806835	0.668362	ATP6V1D	1	M2
hsa00983	Drug metabolism - other enzymes	1/133	79/8036	0.734178	0.807947	0.669283	MGST3	1	M2
hsa04911	Insulin secretion	1/133	86/8036	0.763774	0.820878	0.679995	ATP1B1	1	M2
hsa04540	Gap junction	1/133	88/8036	0.771612	0.821624	0.680613	PDGFB	1	M2
hsa05235	PD-L1 expression and PD-1 checkpoint pathway in cancer	1/133	89/8036	0.775434	0.821888	0.680832	NFATC2	1	M2
hsa05231	Choline metabolism in cancer	1/133	98/8036	0.807095	0.84716	0.701767	PDGFB	1	M2
hsa04914	Progesterone-mediated oocyte maturation	1/133	99/8036	0.810327	0.84716	0.701767	IGF1	1	M2
hsa04660	T cell receptor signaling pathway	1/133	104/8036	0.825699	0.859325	0.711843	NFATC2	1	M2
hsa04931	Insulin resistance	1/133	108/8036	0.837101	0.863378	0.715201	CD36	1	M2
hsa04935	Growth hormone synthesis, secretion and action	1/133	119/8036	0.864779	0.887943	0.73555	IGF1	1	M2
hsa04926	Relaxin signaling pathway	1/133	129/8036	0.885864	0.905549	0.750135	VEGFB	1	M2
hsa04120	Ubiquitin mediated proteolysis	1/133	140/8036	0.905304	0.921327	0.763204	WWP1	1	M2
hsa04390	Hippo signaling pathway	1/133	157/8036	0.929077	0.937227	0.776376	CCND1	1	M2
hsa04080	Neuroactive ligand-receptor interaction	1/133	341/8036	0.99702	0.99702	0.825907	FPR3	1	M2
hsa03010	Ribosome	59/323	158/8036	1.02e-42	2.35e-40	2.14e-40	RPLP1/RPLP0/RPS8/RPS20/RPLP2/RPS6/RPSA/RPL39/RPS12/RPL7/RPL13/RPS29/RPS17/RPS28/RPL37/RPL37A/RPS14/RPS3/RPL41/RPS10/RPL28/RPS21/RPL21/RPL22/RPL27A/RPS19/RPL36A/RPS11/UBA52/RPS24/RPS15/RPL36/RPL32/RPS3A/RPS26/RPS18/MRPL12/RPL12/RPL23/RPL9/RPS7/RPL35/RPL13A/RPL23A/RPS23/MRPL23/RPL31/MRPL33/RPL18/RPS25/RPL6/MRPL11/RPL10A/RPL34/RPS5/MRPL20/RPL7A/RPL22L1/RPS4Y1	59	M3
hsa04110	Cell cycle	33/323	124/8036	8.29e-19	9.53e-17	8.68e-17	PCNA/MAD2L1/MCM4/CCNA2/CDK1/MCM7/CCNB2/MCM6/PTTG1/CHEK1/WEE1/MCM2/YWHAH/MCM3/PLK1/E2F1/ORC6/BUB3/PRKDC/CCNB1/SMC1A/CDC20/RAD21/CDC25B/SMC3/ANAPC11/YWHAQ/TFDP1/MCM5/CCND3/HDAC2/DBF4/CDKN2D	33	M3
hsa05010	Alzheimer disease	26/323	369/8036	0.00365635	0.042048	0.0382954	TUBB/TUBA1B/NDUFB11/TUBA4A/UQCRQ/TUBA1C/GAPDH/NDUFS5/NDUFB9/COX5A/NDUFB1/PSMA7/COX8A/UQCRH/COX7A2/ATP5F1D/ATP2A3/PSMC6/NDUFC2/COX4I1/PSMA4/NDUFA1/ATP5MC1/IRS2/TUBB4B/NDUFS8	26	M3
hsa05012	Parkinson disease	25/323	249/8036	2.07e-05	0.00095168	0.000866748	TUBB/TUBA1B/NDUFB11/TUBA4A/UQCRQ/UBA52/TUBA1C/NDUFS5/NDUFB9/COX5A/NDUFB1/PSMA7/COX8A/UQCRH/COX7A2/ATP5F1D/PSMC6/NDUFC2/COX4I1/PSMA4/NDUFA1/ATP5MC1/TUBB4B/NDUFS8/HSPA5	25	M3
hsa05016	Huntington disease	25/323	306/8036	0.000559176	0.0116919	0.0106484	TUBB/TUBA1B/NDUFB11/TUBA4A/UQCRQ/TUBA1C/NDUFS5/NDUFB9/COX5A/NDUFB1/PSMA7/COX8A/HDAC2/UQCRH/COX7A2/ATP5F1D/PSMC6/NDUFC2/COX4I1/TFAM/PSMA4/NDUFA1/ATP5MC1/TUBB4B/NDUFS8	25	M3
hsa03040	Spliceosome	23/323	149/8036	2.23e-08	1.28e-06	1.17e-06	LSM5/SNRPD2/SNRPE/LSM7/LSM4/SNRPD1/SNRPF/LSM2/SNRPG/HNRNPA1/SRSF10/LSM3/RBMX/HNRNPA3/SRSF3/ALYREF/TXNL4A/SNRPD3/SNRPB/SF3B2/DHX15/SNRPA/U2SURP	23	M3
hsa04714	Thermogenesis	21/323	231/8036	0.000383216	0.00881398	0.00802737	RPS6/NDUFB11/UQCRQ/NDUFS5/SMARCD2/NDUFB9/COX5A/ATP5ME/NDUFB1/COX8A/UQCRH/COX7A2/ATP5F1D/SMARCC1/NDUFC2/COX4I1/NDUFA1/ATP5MC1/NDUFS8/CPT1A/ARID1A	21	M3
hsa03013	RNA transport	17/323	180/8036	0.000890926	0.0168336	0.0153313	RAN/TACC3/XPO1/KPNB1/EIF4EBP2/NUP210/SUMO3/RNPS1/ALYREF/SRRM1/NUP50/UBE2I/EIF2S2/EIF1AX/EIF3A/EIF4EBP1/TPR	17	M3
hsa03030	DNA replication	16/323	36/8036	1.13e-13	8.69e-12	7.91e-12	PCNA/MCM4/MCM7/FEN1/RPA3/MCM6/RPA1/MCM2/MCM3/RNASEH2C/RNASEH2B/POLE3/RFC3/POLD2/MCM5/POLE4	16	M3
hsa00190	Oxidative phosphorylation	16/323	133/8036	7.97e-05	0.00262007	0.00238624	NDUFB11/UQCRQ/NDUFS5/NDUFB9/COX5A/ATP5ME/NDUFB1/COX8A/UQCRH/COX7A2/ATP5F1D/NDUFC2/COX4I1/NDUFA1/ATP5MC1/NDUFS8	16	M3
hsa04141	Protein processing in endoplasmic reticulum	16/323	167/8036	0.00107619	0.0168336	0.0153313	P4HB/HSP90B1/HSP90AA1/RPN2/PDIA6/SSR4/PDIA4/RPN1/STT3B/CALR/EDEM3/ERP29/SSR1/LMAN1/HSPA5/HSPH1	16	M3
hsa04114	Oocyte meiosis	15/323	128/8036	0.000178861	0.00514225	0.00468333	MAD2L1/CDK1/CCNB2/PTTG1/YWHAH/PLK1/CCNB1/SMC1A/CDC20/SMC3/FBXO5/ANAPC11/YWHAQ/PPP1CC/PPP1CA	15	M3
hsa05322	Systemic lupus erythematosus	14/323	136/8036	0.00109131	0.0168336	0.0153313	ELANE/CTSG/H2AFZ/HIST1H4C/H2AFV/HIST1H2AJ/SNRPD1/H2AFX/ACTN4/H2AFJ/SNRPD3/ACTN1/SNRPB/H2AFY	14	M3
hsa04932	Non-alcoholic fatty liver disease (NAFLD)	14/323	149/8036	0.00260871	0.0315791	0.0287608	NDUFB11/UQCRQ/NDUFS5/NDUFB9/COX5A/NDUFB1/COX8A/UQCRH/COX7A2/NDUFC2/COX4I1/NDUFA1/IRS2/NDUFS8	14	M3
hsa04218	Cellular senescence	14/323	156/8036	0.00396987	0.0434796	0.0395992	CCNA2/CDK1/FOXM1/MYBL2/CCNB2/CHEK1/E2F1/CCNB1/RBBP4/ZFP36L2/CCND3/PPP1CC/PPP1CA/EIF4EBP1	14	M3
hsa05203	Viral carcinogenesis	14/323	204/8036	0.0352706	0.279733	0.254768	HIST1H4C/CCNA2/CDK1/CHEK1/YWHAH/RANBP1/CDC20/SYK/ACTN4/YWHAQ/CCND3/HDAC2/ACTN1/PKM	14	M3
hsa05166	Human T-cell leukemia virus 1 infection	14/323	219/8036	0.0578075	0.415492	0.378411	MAD2L1/CCNA2/CCNB2/PTTG1/CHEK1/E2F1/RAN/BUB3/RANBP1/CDC20/XPO1/ANAPC11/CCND3/CALR	14	M3
hsa00983	Drug metabolism - other enzymes	11/323	79/8036	0.00029162	0.00745251	0.00678741	MPO/RRM2/TK1/RRM1/DUT/MGST1/GMPS/GSTP1/IMPDH2/GUSB/CES1	11	M3
hsa05034	Alcoholism	11/323	187/8036	0.132178	0.779508	0.709941	H2AFZ/HIST1H4C/H2AFV/HIST1H2AJ/H2AFX/H2AFJ/HAT1/HDAC2/PPP1CC/PPP1CA/H2AFY	11	M3
hsa04914	Progesterone-mediated oocyte maturation	10/323	99/8036	0.00625071	0.0625071	0.0569287	MAD2L1/CCNA2/CDK1/CCNB2/PLK1/CCNB1/KIF22/CDC25B/HSP90AA1/ANAPC11	10	M3
hsa05130	Pathogenic Escherichia coli infection	10/323	192/8036	0.243849	1	0.910755	TUBB/TUBA1B/RPS3/TUBA4A/TUBA1C/GAPDH/SLC9A3R1/NCL/ARPC4/TUBB4B	10	M3
hsa05170	Human immunodeficiency virus 1 infection	10/323	212/8036	0.347533	1	0.910755	CDK1/CCNB2/CHEK1/WEE1/CCNB1/TMEM173/CALR/RAC2/CFL1/SAMHD1	10	M3
hsa05206	MicroRNAs in cancer	10/323	310/8036	0.806212	1	0.910755	STMN1/CDCA5/BRCA1/E2F1/DNMT1/CDC25B/EZH2/HDAC2/UBE2I/IRS2	10	M3
hsa04151	PI3K-Akt signaling pathway	10/323	354/8036	0.91058	1	0.910755	RPS6/BRCA1/MYB/YWHAH/HSP90B1/HSP90AA1/SYK/YWHAQ/CCND3/EIF4EBP1	10	M3
hsa03018	RNA degradation	9/323	79/8036	0.0042304	0.0442269	0.0402798	ENO1/LSM5/LSM7/LSM4/LSM2/LSM3/HSPD1/XRN2/CNOT1	9	M3
hsa01200	Carbon metabolism	9/323	117/8036	0.0455341	0.337834	0.307684	ENO1/IDH2/GPI/TPI1/GAPDH/PGP/PGAM1/CAT/PKM	9	M3
hsa04120	Ubiquitin mediated proteolysis	9/323	140/8036	0.110468	0.686695	0.625411	UBE2C/BRCA1/CDC20/UBA52/ANAPC11/UBE2S/UBE2I/UBA6/UBA2	9	M3
hsa04217	Necroptosis	9/323	159/8036	0.18983	1	0.910755	HMGB1/H2AFZ/H2AFV/HIST1H2AJ/HSP90AA1/H2AFX/PPIA/H2AFJ/H2AFY	9	M3
hsa03410	Base excision repair	8/323	33/8036	3.59e-05	0.00137794	0.00125497	HMGB1/PCNA/FEN1/POLE3/MBD4/POLD2/POLE4/APEX1	8	M3
hsa03460	Fanconi anemia pathway	8/323	54/8036	0.00129162	0.0185671	0.01691	RPA3/FANCI/BRCA1/USP1/BRCA2/RPA1/FANCD2/CENPX	8	M3
hsa04115	p53 signaling pathway	8/323	73/8036	0.00863877	0.0827882	0.0753998	RRM2/CDK1/CCNB2/GTSE1/CHEK1/CCNB1/SIVA1/CCND3	8	M3
hsa04260	Cardiac muscle contraction	8/323	87/8036	0.0232268	0.205468	0.187131	UQCRQ/COX5A/COX8A/UQCRH/COX7A2/ATP2A3/COX4I1/TPM3	8	M3
hsa04530	Tight junction	8/323	161/8036	0.320558	1	0.910755	PCNA/TUBA1B/TUBA4A/TUBA1C/ACTN4/SLC9A3R1/ACTN1/ACTR2	8	M3
hsa05168	Herpes simplex virus 1 infection	8/323	491/8036	0.999413	1	0.910755	SYK/TMEM173/SRSF3/ALYREF/PPP1CC/PPP1CA/CALR/EIF4EBP1	8	M3
hsa03440	Homologous recombination	7/323	41/8036	0.00109784	0.0168336	0.0153313	RPA3/BRCA1/BRCA2/RPA1/TOPBP1/BARD1/POLD2	7	M3
hsa03420	Nucleotide excision repair	7/323	47/8036	0.00249903	0.0315791	0.0287608	PCNA/RPA3/RPA1/POLE3/RFC3/POLD2/POLE4	7	M3
hsa00010	Glycolysis / Gluconeogenesis	7/323	67/8036	0.0174864	0.160875	0.146518	ENO1/LDHB/GPI/TPI1/GAPDH/PGAM1/PKM	7	M3
hsa03015	mRNA surveillance pathway	7/323	91/8036	0.0728656	0.492914	0.448924	DAZAP1/NUDT21/RNPS1/ALYREF/PPP1CC/SRRM1/PPP1CA	7	M3
hsa00230	Purine metabolism	7/323	130/8036	0.267939	1	0.910755	RRM2/RRM1/GMPS/AK2/IMPDH2/PKM/PDE4D	7	M3
hsa04723	Retrograde endocannabinoid signaling	7/323	148/8036	0.385125	1	0.910755	NDUFB11/NDUFS5/NDUFB9/NDUFB1/NDUFC2/NDUFA1/NDUFS8	7	M3
hsa04145	Phagosome	7/323	152/8036	0.411727	1	0.910755	MPO/TUBB/TUBA1B/TUBA4A/TUBA1C/CALR/TUBB4B	7	M3
hsa05169	Epstein-Barr virus infection	7/323	202/8036	0.709308	1	0.910755	CCNA2/E2F1/SYK/CCND3/HDAC2/PSMC6/CALR	7	M3
hsa04810	Regulation of actin cytoskeleton	7/323	214/8036	0.763607	1	0.910755	ACTN4/PPP1CC/PPP1CA/ARPC4/ACTN1/RAC2/CFL1	7	M3
hsa05165	Human papillomavirus infection	7/323	331/8036	0.982023	1	0.910755	CCNA2/E2F1/SLC9A3R1/CCND3/HDAC2/EIF4EBP1/PKM	7	M3
hsa00240	Pyrimidine metabolism	6/323	57/8036	0.0260988	0.214383	0.195251	TYMS/RRM2/TK1/RRM1/DUT/DTYMK	6	M3
hsa00480	Glutathione metabolism	6/323	57/8036	0.0260988	0.214383	0.195251	RRM2/RRM1/MGST1/IDH2/GGCT/GSTP1	6	M3
hsa01524	Platinum drug resistance	6/323	73/8036	0.0724277	0.492914	0.448924	TOP2A/BIRC5/BRCA1/MGST1/GSTP1/TOP2B	6	M3
hsa01230	Biosynthesis of amino acids	6/323	74/8036	0.0762969	0.50138	0.456634	ENO1/IDH2/TPI1/GAPDH/PGAM1/PKM	6	M3
hsa04540	Gap junction	6/323	88/8036	0.142137	0.797352	0.726192	TUBB/CDK1/TUBA1B/TUBA4A/TUBA1C/TUBB4B	6	M3
hsa03008	Ribosome biogenesis in eukaryotes	6/323	112/8036	0.294915	1	0.910755	RAN/XPO1/NOP58/NOP56/FBL/XRN2	6	M3
hsa04152	AMPK signaling pathway	6/323	120/8036	0.352105	1	0.910755	CCNA2/TBC1D1/ELAVL1/EIF4EBP1/IRS2/CPT1A	6	M3
hsa04068	FoxO signaling pathway	6/323	131/8036	0.43177	1	0.910755	CCNB2/PLK1/CCNB1/CAT/IRS2/CDKN2D	6	M3
hsa05418	Fluid shear stress and atherosclerosis	6/323	139/8036	0.4888	1	0.910755	MGST1/HSP90B1/HSP90AA1/GSTP1/SUMO3/RAC2	6	M3
hsa04390	Hippo signaling pathway	6/323	157/8036	0.60884	1	0.910755	BIRC5/YWHAH/YWHAQ/CCND3/PPP1CC/PPP1CA	6	M3
hsa05225	Hepatocellular carcinoma	6/323	168/8036	0.674024	1	0.910755	MGST1/E2F1/GSTP1/SMARCD2/SMARCC1/ARID1A	6	M3
hsa05202	Transcriptional misregulation in cancer	6/323	192/8036	0.790424	1	0.910755	MPO/ELANE/CCNA2/NSD2/HDAC2/FUS	6	M3
hsa04510	Focal adhesion	6/323	201/8036	0.824911	1	0.910755	ACTN4/CCND3/PPP1CC/PPP1CA/ACTN1/RAC2	6	M3
hsa05132	Salmonella infection	6/323	213/8036	0.863723	1	0.910755	RPS3/HSP90B1/HSP90AA1/GAPDH/ARPC4/DYNLL2	6	M3
hsa04024	cAMP signaling pathway	6/323	216/8036	0.872235	1	0.910755	ATP2B4/PPP1CC/ATP2A3/PPP1CA/RAC2/PDE4D	6	M3
hsa05131	Shigellosis	6/323	242/8036	0.928996	1	0.910755	CBX3/UBA52/ACTN4/TMEM173/ARPC4/ACTN1	6	M3
hsa03430	Mismatch repair	5/323	23/8036	0.00188181	0.0254597	0.0231876	PCNA/RPA3/RPA1/RFC3/POLD2	5	M3
hsa04066	HIF-1 signaling pathway	5/323	109/8036	0.447148	1	0.910755	ENO1/RPS6/LDHB/GAPDH/EIF4EBP1	5	M3
hsa04611	Platelet activation	5/323	124/8036	0.561588	1	0.910755	RASGRP2/SYK/PPP1CC/PPP1CA/VAMP8	5	M3
hsa05017	Spinocerebellar ataxia	5/323	133/8036	0.62425	1	0.910755	PSMA7/NOP56/ATP2A3/PSMC6/PSMA4	5	M3
hsa04210	Apoptosis	5/323	136/8036	0.643911	1	0.910755	BIRC5/TUBA1B/LMNB1/TUBA4A/TUBA1C	5	M3
hsa04910	Insulin signaling pathway	5/323	137/8036	0.650321	1	0.910755	RPS6/PPP1CC/PPP1CA/EIF4EBP1/IRS2	5	M3
hsa04261	Adrenergic signaling in cardiomyocytes	5/323	149/8036	0.721423	1	0.910755	ATP2B4/PPP1CC/ATP2A3/PPP1CA/TPM3	5	M3
hsa05161	Hepatitis B	5/323	162/8036	0.786146	1	0.910755	PCNA/BIRC5/CCNA2/E2F1/YWHAQ	5	M3
hsa04022	cGMP-PKG signaling pathway	5/323	167/8036	0.807717	1	0.910755	ATP2B4/PPP1CC/ATP2A3/PPP1CA/IRS2	5	M3
hsa05163	Human cytomegalovirus infection	5/323	225/8036	0.952071	1	0.910755	E2F1/TMEM173/CALR/EIF4EBP1/RAC2	5	M3
hsa04010	MAPK signaling pathway	5/323	294/8036	0.993059	1	0.910755	STMN1/RASGRP2/CDC25B/PTPN7/RAC2	5	M3
hsa00510	N-Glycan biosynthesis	4/323	50/8036	0.140301	0.797352	0.726192	RPN2/RPN1/STT3B/DPM3	4	M3
hsa04213	Longevity regulating pathway - multiple species	4/323	62/8036	0.237979	1	0.910755	EIF4EBP2/CAT/HDAC2/IRS2	4	M3
hsa05230	Central carbon metabolism in cancer	4/323	70/8036	0.309967	1	0.910755	LDHB/IDH2/PGAM1/PKM	4	M3
hsa04211	Longevity regulating pathway	4/323	89/8036	0.483121	1	0.910755	CAT/APPL1/EIF4EBP1/IRS2	4	M3
hsa04666	Fc gamma R-mediated phagocytosis	4/323	93/8036	0.517759	1	0.910755	SYK/ARPC4/RAC2/CFL1	4	M3
hsa04657	IL-17 signaling pathway	4/323	94/8036	0.526251	1	0.910755	HSP90B1/HSP90AA1/ELAVL1/IL17RA	4	M3
hsa05215	Prostate cancer	4/323	97/8036	0.551282	1	0.910755	E2F1/HSP90B1/HSP90AA1/GSTP1	4	M3
hsa05231	Choline metabolism in cancer	4/323	98/8036	0.55947	1	0.910755	SLC44A1/EIF4EBP1/DGKZ/RAC2	4	M3
hsa05146	Amoebiasis	4/323	102/8036	0.591398	1	0.910755	CTSG/SERPINB10/ACTN4/ACTN1	4	M3
hsa04922	Glucagon signaling pathway	4/323	106/8036	0.621931	1	0.910755	LDHB/PGAM1/CPT1A/PKM	4	M3
hsa04931	Insulin resistance	4/323	108/8036	0.636649	1	0.910755	PPP1CC/PPP1CA/IRS2/CPT1A	4	M3
hsa05164	Influenza A	4/323	171/8036	0.918025	1	0.910755	XPO1/KPNA2/CCND3/HNRNPUL1	4	M3
hsa00670	One carbon pool by folate	3/323	20/8036	0.0441832	0.337834	0.307684	TYMS/DHFR/MTHFD2	3	M3
hsa01523	Antifolate resistance	3/323	31/8036	0.126769	0.767287	0.69881	TYMS/DHFR/GGH	3	M3
hsa00513	Various types of N-glycan biosynthesis	3/323	39/8036	0.205655	1	0.910755	RPN2/RPN1/STT3B	3	M3
hsa03050	Proteasome	3/323	46/8036	0.281479	1	0.910755	PSMA7/PSMC6/PSMA4	3	M3
hsa05221	Acute myeloid leukemia	3/323	67/8036	0.508836	1	0.910755	MPO/CCNA2/EIF4EBP1	3	M3
hsa05031	Amphetamine addiction	3/323	69/8036	0.528769	1	0.910755	HDAC2/PPP1CC/PPP1CA	3	M3
hsa04520	Adherens junction	3/323	71/8036	0.548247	1	0.910755	ACTN4/ACTN1/RAC2	3	M3
hsa04918	Thyroid hormone synthesis	3/323	75/8036	0.585749	1	0.910755	HSP90B1/PDIA4/HSPA5	3	M3
hsa05212	Pancreatic cancer	3/323	76/8036	0.59481	1	0.910755	BRCA2/E2F1/RAC2	3	M3
hsa04612	Antigen processing and presentation	3/323	78/8036	0.612542	1	0.910755	HSP90AA1/CALR/HSPA5	3	M3
hsa04146	Peroxisome	3/323	83/8036	0.654557	1	0.910755	IDH2/PXMP2/CAT	3	M3
hsa05210	Colorectal cancer	3/323	86/8036	0.678156	1	0.910755	BIRC5/APPL1/RAC2	3	M3
hsa04970	Salivary secretion	3/323	93/8036	0.728533	1	0.910755	LYZ/CD38/ATP2B4	3	M3
hsa04750	Inflammatory mediator regulation of TRP channels	3/323	100/8036	0.77253	1	0.910755	P2RY2/PPP1CC/PPP1CA	3	M3
hsa04972	Pancreatic secretion	3/323	102/8036	0.78398	1	0.910755	CD38/ATP2B4/ATP2A3	3	M3
hsa04670	Leukocyte transendothelial migration	3/323	113/8036	0.838717	1	0.910755	ACTN4/ACTN1/RAC2	3	M3
hsa04140	Autophagy - animal	3/323	137/8036	0.918188	1	0.910755	HMGB1/VAMP8/IRS2	3	M3
hsa05224	Breast cancer	3/323	147/8036	0.939198	1	0.910755	BRCA1/BRCA2/E2F1	3	M3
hsa04921	Oxytocin signaling pathway	3/323	154/8036	0.950812	1	0.910755	CD38/PPP1CC/PPP1CA	3	M3
hsa05160	Hepatitis C	3/323	156/8036	0.95373	1	0.910755	YWHAH/E2F1/YWHAQ	3	M3
hsa04062	Chemokine signaling pathway	3/323	189/8036	0.983694	1	0.910755	RASGRP2/GRK2/RAC2	3	M3
hsa05167	Kaposi sarcoma-associated herpesvirus infection	3/323	189/8036	0.983694	1	0.910755	E2F1/UBA52/SYK	3	M3
hsa04020	Calcium signaling pathway	3/323	201/8036	0.988993	1	0.910755	CD38/ATP2B4/ATP2A3	3	M3
hsa05205	Proteoglycans in cancer	3/323	205/8036	0.990359	1	0.910755	RPS6/PPP1CC/PPP1CA	3	M3
hsa03450	Non-homologous end-joining	2/323	13/8036	0.0938348	0.5995	0.545998	FEN1/PRKDC	2	M3
hsa03060	Protein export	2/323	23/8036	0.235788	1	0.910755	SPCS3/HSPA5	2	M3
hsa04614	Renin-angiotensin system	2/323	23/8036	0.235788	1	0.910755	CTSG/LNPEP	2	M3
hsa00790	Folate biosynthesis	2/323	26/8036	0.281104	1	0.910755	DHFR/GGH	2	M3
hsa00630	Glyoxylate and dicarboxylate metabolism	2/323	30/8036	0.341088	1	0.910755	PGP/CAT	2	M3
hsa00040	Pentose and glucuronate interconversions	2/323	34/8036	0.399436	1	0.910755	DCXR/GUSB	2	M3
hsa00760	Nicotinate and nicotinamide metabolism	2/323	35/8036	0.413657	1	0.910755	CD38/NNT	2	M3
hsa05216	Thyroid cancer	2/323	37/8036	0.441583	1	0.910755	TPR/TPM3	2	M3
hsa00620	Pyruvate metabolism	2/323	39/8036	0.468763	1	0.910755	LDHB/PKM	2	M3
hsa04930	Type II diabetes mellitus	2/323	46/8036	0.557323	1	0.910755	IRS2/PKM	2	M3
hsa00270	Cysteine and methionine metabolism	2/323	49/8036	0.591942	1	0.910755	LDHB/DNMT1	2	M3
hsa00310	Lysine degradation	2/323	61/8036	0.710102	1	0.910755	NSD2/EZH2	2	M3
hsa04720	Long-term potentiation	2/323	67/8036	0.757644	1	0.910755	PPP1CC/PPP1CA	2	M3
hsa04137	Mitophagy - animal	2/323	68/8036	0.76488	1	0.910755	E2F1/UBA52	2	M3
hsa04664	Fc epsilon RI signaling pathway	2/323	68/8036	0.76488	1	0.910755	SYK/RAC2	2	M3
hsa04920	Adipocytokine signaling pathway	2/323	69/8036	0.771928	1	0.910755	IRS2/CPT1A	2	M3
hsa00982	Drug metabolism - cytochrome P450	2/323	71/8036	0.785474	1	0.910755	MGST1/GSTP1	2	M3
hsa00980	Metabolism of xenobiotics by cytochrome P450	2/323	76/8036	0.816289	1	0.910755	MGST1/GSTP1	2	M3
hsa05220	Chronic myeloid leukemia	2/323	76/8036	0.816289	1	0.910755	E2F1/HDAC2	2	M3
hsa01521	EGFR tyrosine kinase inhibitor resistance	2/323	79/8036	0.832826	1	0.910755	RPS6/EIF4EBP1	2	M3
hsa04662	B cell receptor signaling pathway	2/323	82/8036	0.84801	1	0.910755	SYK/RAC2	2	M3
hsa05204	Chemical carcinogenesis	2/323	82/8036	0.84801	1	0.910755	MGST1/GSTP1	2	M3
hsa05410	Hypertrophic cardiomyopathy (HCM)	2/323	90/8036	0.882568	1	0.910755	ATP2A3/TPM3	2	M3
hsa05032	Morphine addiction	2/323	91/8036	0.886338	1	0.910755	GRK2/PDE4D	2	M3
hsa05222	Small cell lung cancer	2/323	92/8036	0.889996	1	0.910755	CKS1B/E2F1	2	M3
hsa05414	Dilated cardiomyopathy (DCM)	2/323	96/8036	0.903564	1	0.910755	ATP2A3/TPM3	2	M3
hsa00564	Glycerophospholipid metabolism	2/323	98/8036	0.909747	1	0.910755	PLD4/DGKZ	2	M3
hsa04064	NF-kappa B signaling pathway	2/323	104/8036	0.926145	1	0.910755	SYK/UBE2I	2	M3
hsa04928	Parathyroid hormone synthesis, secretion and action	2/323	106/8036	0.930958	1	0.910755	SLC9A3R1/PDE4D	2	M3
hsa04919	Thyroid hormone signaling pathway	2/323	121/8036	0.958669	1	0.910755	HDAC2/ATP2A3	2	M3
hsa04142	Lysosome	2/323	128/8036	0.967608	1	0.910755	CTSG/GUSB	2	M3
hsa05135	Yersinia infection	2/323	130/8036	0.9698	1	0.910755	ACTR2/RAC2	2	M3
hsa04650	Natural killer cell mediated cytotoxicity	2/323	131/8036	0.970842	1	0.910755	SYK/RAC2	2	M3
hsa04728	Dopaminergic synapse	2/323	132/8036	0.971849	1	0.910755	PPP1CC/PPP1CA	2	M3
hsa04270	Vascular smooth muscle contraction	2/323	135/8036	0.974674	1	0.910755	PPP1CC/PPP1CA	2	M3
hsa04371	Apelin signaling pathway	2/323	137/8036	0.976403	1	0.910755	RPS6/TFAM	2	M3
hsa04915	Estrogen signaling pathway	2/323	138/8036	0.977224	1	0.910755	HSP90B1/HSP90AA1	2	M3
hsa04072	Phospholipase D signaling pathway	2/323	148/8036	0.984055	1	0.910755	SYK/DGKZ	2	M3
hsa04150	mTOR signaling pathway	2/323	155/8036	0.987606	1	0.910755	RPS6/EIF4EBP1	2	M3
hsa04310	Wnt signaling pathway	2/323	160/8036	0.989659	1	0.910755	CCND3/RAC2	2	M3
hsa05152	Tuberculosis	2/323	180/8036	0.99503	1	0.910755	SYK/HSPD1	2	M3
hsa04360	Axon guidance	2/323	181/8036	0.99521	1	0.910755	RAC2/CFL1	2	M3
hsa04621	NOD-like receptor signaling pathway	2/323	181/8036	0.99521	1	0.910755	HSP90AA1/TMEM173	2	M3
hsa04015	Rap1 signaling pathway	2/323	210/8036	0.99838	1	0.910755	RASGRP2/RAC2	2	M3
hsa04014	Ras signaling pathway	2/323	232/8036	0.999297	1	0.910755	RASGRP2/RAC2	2	M3
hsa04144	Endocytosis	2/323	248/8036	0.99962	1	0.910755	GRK2/ARPC4	2	M3
hsa04080	Neuroactive ligand-receptor interaction	2/323	341/8036	0.99999	1	0.910755	CTSG/P2RY2	2	M3
hsa00360	Phenylalanine metabolism	1/323	16/8036	0.481603	1	0.910755	MIF	1	M3
hsa00730	Thiamine metabolism	1/323	16/8036	0.481603	1	0.910755	AK2	1	M3
hsa01210	2-Oxocarboxylic acid metabolism	1/323	18/8036	0.522521	1	0.910755	IDH2	1	M3
hsa00531	Glycosaminoglycan degradation	1/323	19/8036	0.541756	1	0.910755	GUSB	1	M3
hsa00100	Steroid biosynthesis	1/323	20/8036	0.560218	1	0.910755	LBR	1	M3
hsa00515	Mannose type O-glycan biosynthesis	1/323	23/8036	0.611273	1	0.910755	FUT4	1	M3
hsa00563	Glycosylphosphatidylinositol (GPI)-anchor biosynthesis	1/323	25/8036	0.641982	1	0.910755	GPAA1	1	M3
hsa00601	Glycosphingolipid biosynthesis - lacto and neolacto series	1/323	27/8036	0.670272	1	0.910755	FUT4	1	M3
hsa00650	Butanoate metabolism	1/323	28/8036	0.68357	1	0.910755	ACSM3	1	M3
hsa00020	Citrate cycle (TCA cycle)	1/323	30/8036	0.708583	1	0.910755	IDH2	1	M3
hsa00030	Pentose phosphate pathway	1/323	30/8036	0.708583	1	0.910755	GPI	1	M3
hsa05310	Asthma	1/323	31/8036	0.72034	1	0.910755	RNASE3	1	M3
hsa04215	Apoptosis - multiple species	1/323	32/8036	0.731624	1	0.910755	BIRC5	1	M3
hsa00051	Fructose and mannose metabolism	1/323	33/8036	0.742454	1	0.910755	TPI1	1	M3
hsa04130	SNARE interactions in vesicular transport	1/323	33/8036	0.742454	1	0.910755	VAMP8	1	M3
hsa00640	Propanoate metabolism	1/323	34/8036	0.752849	1	0.910755	LDHB	1	M3
hsa00350	Tyrosine metabolism	1/323	35/8036	0.762825	1	0.910755	MIF	1	M3
hsa05020	Prion diseases	1/323	35/8036	0.762825	1	0.910755	HSPA5	1	M3
hsa00250	Alanine, aspartate and glutamate metabolism	1/323	36/8036	0.7724	1	0.910755	ASRGL1	1	M3
hsa00500	Starch and sucrose metabolism	1/323	36/8036	0.7724	1	0.910755	GPI	1	M3
hsa00260	Glycine, serine and threonine metabolism	1/323	40/8036	0.806997	1	0.910755	PGAM1	1	M3
hsa05219	Bladder cancer	1/323	41/8036	0.814793	1	0.910755	E2F1	1	M3
hsa00380	Tryptophan metabolism	1/323	42/8036	0.822275	1	0.910755	CAT	1	M3
hsa00860	Porphyrin and chlorophyll metabolism	1/323	42/8036	0.822275	1	0.910755	GUSB	1	M3
hsa04940	Type I diabetes mellitus	1/323	43/8036	0.829456	1	0.910755	HSPD1	1	M3
hsa00071	Fatty acid degradation	1/323	44/8036	0.836348	1	0.910755	CPT1A	1	M3
hsa04962	Vasopressin-regulated water reabsorption	1/323	44/8036	0.836348	1	0.910755	DYNLL2	1	M3
hsa02010	ABC transporters	1/323	45/8036	0.842962	1	0.910755	DEFB1	1	M3
hsa00520	Amino sugar and nucleotide sugar metabolism	1/323	48/8036	0.861248	1	0.910755	GPI	1	M3
hsa00565	Ether lipid metabolism	1/323	49/8036	0.866858	1	0.910755	PLD4	1	M3
hsa04340	Hedgehog signaling pathway	1/323	50/8036	0.872243	1	0.910755	GRK2	1	M3
hsa05110	Vibrio cholerae infection	1/323	50/8036	0.872243	1	0.910755	PDIA4	1	M3
hsa04330	Notch signaling pathway	1/323	53/8036	0.887128	1	0.910755	HDAC2	1	M3
hsa04961	Endocrine and other factor-regulated calcium reabsorption	1/323	53/8036	0.887128	1	0.910755	ATP2B4	1	M3
hsa04923	Regulation of lipolysis in adipocytes	1/323	56/8036	0.900283	1	0.910755	IRS2	1	M3
hsa01212	Fatty acid metabolism	1/323	57/8036	0.904319	1	0.910755	CPT1A	1	M3
hsa05014	Amyotrophic lateral sclerosis (ALS)	1/323	57/8036	0.904319	1	0.910755	CAT	1	M3
hsa05134	Legionellosis	1/323	57/8036	0.904319	1	0.910755	HSPD1	1	M3
hsa04370	VEGF signaling pathway	1/323	59/8036	0.911909	1	0.910755	RAC2	1	M3
hsa04978	Mineral absorption	1/323	59/8036	0.911909	1	0.910755	ATP2B4	1	M3
hsa05416	Viral myocarditis	1/323	60/8036	0.915476	1	0.910755	RAC2	1	M3
hsa00561	Glycerolipid metabolism	1/323	61/8036	0.918899	1	0.910755	DGKZ	1	M3
hsa00590	Arachidonic acid metabolism	1/323	63/8036	0.925336	1	0.910755	PTGES3	1	M3
hsa04623	Cytosolic DNA-sensing pathway	1/323	63/8036	0.925336	1	0.910755	TMEM173	1	M3
hsa05223	Non-small cell lung cancer	1/323	68/8036	0.939286	1	0.910755	E2F1	1	M3
hsa04622	RIG-I-like receptor signaling pathway	1/323	70/8036	0.944109	1	0.910755	TMEM173	1	M3
hsa05218	Melanoma	1/323	72/8036	0.94855	1	0.910755	E2F1	1	M3
hsa00562	Inositol phosphate metabolism	1/323	73/8036	0.950637	1	0.910755	TPI1	1	M3
hsa05100	Bacterial invasion of epithelial cells	1/323	73/8036	0.950637	1	0.910755	ARPC4	1	M3
hsa05214	Glioma	1/323	75/8036	0.95456	1	0.910755	E2F1	1	M3
hsa05133	Pertussis	1/323	76/8036	0.956404	1	0.910755	CFL1	1	M3
hsa03320	PPAR signaling pathway	1/323	77/8036	0.958173	1	0.910755	CPT1A	1	M3
hsa05412	Arrhythmogenic right ventricular cardiomyopathy (ARVC)	1/323	77/8036	0.958173	1	0.910755	ATP2A3	1	M3
hsa04012	ErbB signaling pathway	1/323	85/8036	0.969977	1	0.910755	EIF4EBP1	1	M3
hsa04512	ECM-receptor interaction	1/323	88/8036	0.97349	1	0.910755	HMMR	1	M3
hsa04350	TGF-beta signaling pathway	1/323	94/8036	0.979333	1	0.910755	TFDP1	1	M3
hsa05150	Staphylococcus aureus infection	1/323	96/8036	0.98098	1	0.910755	DEFB1	1	M3
hsa04070	Phosphatidylinositol signaling system	1/323	97/8036	0.981754	1	0.910755	DGKZ	1	M3
hsa01522	Endocrine resistance	1/323	98/8036	0.982496	1	0.910755	E2F1	1	M3
hsa04925	Aldosterone synthesis and secretion	1/323	98/8036	0.982496	1	0.910755	ATP2B4	1	M3
hsa04640	Hematopoietic cell lineage	1/323	99/8036	0.983209	1	0.910755	CD38	1	M3
hsa05142	Chagas disease (American trypanosomiasis)	1/323	102/8036	0.985177	1	0.910755	CALR	1	M3
hsa04625	C-type lectin receptor signaling pathway	1/323	104/8036	0.986359	1	0.910755	SYK	1	M3
hsa04659	Th17 cell differentiation	1/323	107/8036	0.987959	1	0.910755	HSP90AA1	1	M3
hsa04724	Glutamatergic synapse	1/323	114/8036	0.991001	1	0.910755	GRK2	1	M3
hsa04071	Sphingolipid signaling pathway	1/323	119/8036	0.992692	1	0.910755	RAC2	1	M3
hsa04935	Growth hormone synthesis, secretion and action	1/323	119/8036	0.992692	1	0.910755	IRS2	1	M3
hsa04380	Osteoclast differentiation	1/323	128/8036	0.994978	1	0.910755	SYK	1	M3
hsa05162	Measles	1/323	139/8036	0.996827	1	0.910755	CCND3	1	M3
hsa04550	Signaling pathways regulating pluripotency of stem cells	1/323	143/8036	0.997315	1	0.910755	RIF1	1	M3
hsa04514	Cell adhesion molecules (CAMs)	1/323	148/8036	0.997821	1	0.910755	SPN	1	M3
hsa05226	Gastric cancer	1/323	149/8036	0.99791	1	0.910755	E2F1	1	M3
hsa04934	Cushing syndrome	1/323	155/8036	0.998374	1	0.910755	E2F1	1	M3
hsa04630	JAK-STAT signaling pathway	1/323	162/8036	0.998787	1	0.910755	CCND3	1	M3
hsa04060	Cytokine-cytokine receptor interaction	1/323	294/8036	0.999995	1	0.910755	IL17RA	1	M3
hsa04740	Olfactory transduction	1/323	448/8036	1	1	0.910755	GRK2	1	M3
