# Supplementary material for: Single-cell RNA sequencing of human femoral head in vivo
Source: Aging (Albany NY). 2021 Jun 10;13(11):15595–619. doi: 10.18632/aging.203124 (PMC8221309; doi:10.18632/aging.203124)
Supplement: Supplementary Table 10 [file aging-13-203124-s011.xlsx]

## Sheet: Sheet1
Supplementary Table 10. GO enrichment analyses of each T cells subtype.
ID	Description	GeneRatio	BgRatio	pvalue	p.adjust	qvalue	geneID	Count	Subtype
GO:0002521	leukocyte differentiation	17/62	485/17913	4.12e-13	2.4e-10	1.81e-10	IL7R/GPR183/CD4/JUNB/CCR7/ITGB1/CCR6/ZFP36L2/CD40LG/SOCS1/CD2/ANXA1/FOS/BATF/FOXP1/LGALS1/KLF6	17	T1
GO:0030098	lymphocyte differentiation	15/62	325/17913	2.37e-13	2.4e-10	1.81e-10	IL7R/GPR183/CD4/CCR7/ITGB1/CCR6/ZFP36L2/CD40LG/SOCS1/CD2/ANXA1/BATF/FOXP1/LGALS1/KLF6	15	T1
GO:0051249	regulation of lymphocyte activation	15/62	401/17913	4.89e-12	2.14e-09	1.62e-09	IL7R/GPR183/TNFRSF4/CD4/CCR7/CDKN1A/SAMSN1/IRS2/ZFP36L2/CD40LG/ICOS/SOCS1/CD2/ANXA1/LGALS1	15	T1
GO:0042110	T cell activation	15/62	443/17913	2.01e-11	7.04e-09	5.32e-09	IL7R/GPR183/TNFRSF4/CD4/CCR7/CCR6/ZFP36L2/CD40LG/ICOS/SOCS1/CD2/ANXA1/BATF/FOXP1/LGALS1	15	T1
GO:0002694	regulation of leukocyte activation	15/62	492/17913	8.79e-11	1.71e-08	1.29e-08	IL7R/GPR183/TNFRSF4/CD4/CCR7/CDKN1A/SAMSN1/IRS2/ZFP36L2/CD40LG/ICOS/SOCS1/CD2/ANXA1/LGALS1	15	T1
GO:0042113	B cell activation	13/62	215/17913	3.69e-13	2.4e-10	1.81e-10	IL7R/GPR183/TNFRSF4/ITGB1/CDKN1A/SAMSN1/CCR6/IRS2/ZFP36L2/CD40LG/BATF/LGALS1/KLF6	13	T1
GO:0002696	positive regulation of leukocyte activation	13/62	305/17913	3.08e-11	9e-09	6.79e-09	IL7R/GPR183/TNFRSF4/CD4/CCR7/CDKN1A/IRS2/CD40LG/ICOS/SOCS1/CD2/ANXA1/LGALS1	13	T1
GO:0050867	positive regulation of cell activation	13/62	319/17913	5.39e-11	1.35e-08	1.02e-08	IL7R/GPR183/TNFRSF4/CD4/CCR7/CDKN1A/IRS2/CD40LG/ICOS/SOCS1/CD2/ANXA1/LGALS1	13	T1
GO:0051251	positive regulation of lymphocyte activation	12/62	258/17913	7.04e-11	1.54e-08	1.16e-08	IL7R/GPR183/TNFRSF4/CD4/CCR7/CDKN1A/IRS2/CD40LG/ICOS/SOCS1/ANXA1/LGALS1	12	T1
GO:0030217	T cell differentiation	11/62	234/17913	4.23e-10	7.4e-08	5.59e-08	IL7R/GPR183/CD4/CCR7/CCR6/ZFP36L2/SOCS1/CD2/ANXA1/BATF/FOXP1	11	T1
GO:0007159	leukocyte cell-cell adhesion	10/62	328/17913	1.71e-07	2.49e-05	1.88e-05	IL7R/CD4/CCR7/ITGB1/CD40LG/ICOS/SOCS1/ANXA1/EZR/LGALS1	10	T1
GO:0045785	positive regulation of cell adhesion	10/62	388/17913	7.98e-07	7.76e-05	5.86e-05	IL7R/CD4/CCR7/S100A10/CD40LG/ICOS/SOCS1/ANXA1/SPOCK2/LGALS1	10	T1
GO:0050708	regulation of protein secretion	10/62	456/17913	3.4e-06	0.000229306	0.000173139	TNFRSF4/CCR7/IRS2/CD40LG/SOCS1/CD2/ANXA1/EZR/PIM3/FOXP1	10	T1
GO:0002791	regulation of peptide secretion	10/62	483/17913	5.66e-06	0.000302208	0.000228184	TNFRSF4/CCR7/IRS2/CD40LG/SOCS1/CD2/ANXA1/EZR/PIM3/FOXP1	10	T1
GO:0050863	regulation of T cell activation	9/62	307/17913	1.04e-06	9.56e-05	7.22e-05	IL7R/CD4/CCR7/CD40LG/ICOS/SOCS1/CD2/ANXA1/LGALS1	9	T1
GO:0022407	regulation of cell-cell adhesion	9/62	389/17913	7.19e-06	0.000359534	0.000271469	IL7R/CD4/CCR7/CD40LG/ICOS/FXYD5/SOCS1/ANXA1/LGALS1	9	T1
GO:0050870	positive regulation of T cell activation	8/62	198/17913	3.92e-07	4.29e-05	3.24e-05	IL7R/CD4/CCR7/CD40LG/ICOS/SOCS1/ANXA1/LGALS1	8	T1
GO:1903039	positive regulation of leukocyte cell-cell adhesion	8/62	214/17913	7.07e-07	7.29e-05	5.5e-05	IL7R/CD4/CCR7/CD40LG/ICOS/SOCS1/ANXA1/LGALS1	8	T1
GO:0046651	lymphocyte proliferation	8/62	244/17913	1.89e-06	0.000157977	0.000119282	IL7R/GPR183/TNFRSF4/CD4/CDKN1A/IRS2/CD40LG/ANXA1	8	T1
GO:0032943	mononuclear cell proliferation	8/62	246/17913	2.01e-06	0.000160261	0.000121006	IL7R/GPR183/TNFRSF4/CD4/CDKN1A/IRS2/CD40LG/ANXA1	8	T1
GO:0022409	positive regulation of cell-cell adhesion	8/62	251/17913	2.34e-06	0.000170649	0.00012885	IL7R/CD4/CCR7/CD40LG/ICOS/SOCS1/ANXA1/LGALS1	8	T1
GO:1902105	regulation of leukocyte differentiation	8/62	267/17913	3.7e-06	0.000239824	0.000181081	IL7R/CD4/ZFP36L2/SOCS1/CD2/ANXA1/FOS/FOXP1	8	T1
GO:0070661	leukocyte proliferation	8/62	270/17913	4.02e-06	0.000251145	0.000189629	IL7R/GPR183/TNFRSF4/CD4/CDKN1A/IRS2/CD40LG/ANXA1	8	T1
GO:1903037	regulation of leukocyte cell-cell adhesion	8/62	295/17913	7.69e-06	0.000374175	0.000282523	IL7R/CD4/CCR7/CD40LG/ICOS/SOCS1/ANXA1/LGALS1	8	T1
GO:0042326	negative regulation of phosphorylation	8/62	455/17913	0.000165538	0.00397064	0.00299806	SOCS3/CDKN1A/SAMSN1/IRS2/SOCS1/EZR/DDIT4/DUSP4	8	T1
GO:1903706	regulation of hemopoiesis	8/62	468/17913	0.000200579	0.00468285	0.00353582	IL7R/CD4/ZFP36L2/SOCS1/CD2/ANXA1/FOS/FOXP1	8	T1
GO:0050671	positive regulation of lymphocyte proliferation	7/62	125/17913	2.43e-07	3.21e-05	2.43e-05	GPR183/TNFRSF4/CD4/CDKN1A/IRS2/CD40LG/ANXA1	7	T1
GO:0032946	positive regulation of mononuclear cell proliferation	7/62	126/17913	2.57e-07	3.21e-05	2.43e-05	GPR183/TNFRSF4/CD4/CDKN1A/IRS2/CD40LG/ANXA1	7	T1
GO:0070665	positive regulation of leukocyte proliferation	7/62	134/17913	3.91e-07	4.29e-05	3.24e-05	GPR183/TNFRSF4/CD4/CDKN1A/IRS2/CD40LG/ANXA1	7	T1
GO:0002285	lymphocyte activation involved in immune response	7/62	158/17913	1.19e-06	0.000104203	7.87e-05	GPR183/CCR6/CD40LG/ANXA1/BATF/FOXP1/LGALS1	7	T1
GO:0050670	regulation of lymphocyte proliferation	7/62	199/17913	5.51e-06	0.000302208	0.000228184	GPR183/TNFRSF4/CD4/CDKN1A/IRS2/CD40LG/ANXA1	7	T1
GO:0032944	regulation of mononuclear cell proliferation	7/62	200/17913	5.7e-06	0.000302208	0.000228184	GPR183/TNFRSF4/CD4/CDKN1A/IRS2/CD40LG/ANXA1	7	T1
GO:0002573	myeloid leukocyte differentiation	7/62	201/17913	5.89e-06	0.000303086	0.000228847	GPR183/CD4/JUNB/CCR7/FOS/BATF/FOXP1	7	T1
GO:0070663	regulation of leukocyte proliferation	7/62	214/17913	8.87e-06	0.000408689	0.000308584	GPR183/TNFRSF4/CD4/CDKN1A/IRS2/CD40LG/ANXA1	7	T1
GO:0071356	cellular response to tumor necrosis factor	7/62	266/17913	3.6e-05	0.00129144	0.000975108	LTB/TNFRSF4/TNFRSF25/TRADD/ZFP36L2/CD40LG/BIRC3	7	T1
GO:0034612	response to tumor necrosis factor	7/62	284/17913	5.46e-05	0.00168546	0.00127262	LTB/TNFRSF4/TNFRSF25/TRADD/ZFP36L2/CD40LG/BIRC3	7	T1
GO:0048545	response to steroid hormone	7/62	375/17913	0.000304429	0.00666318	0.00503108	CDKN1A/ZFP36L2/ANXA1/FOS/DDIT4/FOXP1/NR3C1	7	T1
GO:0030099	myeloid cell differentiation	7/62	411/17913	0.000527493	0.0102627	0.0077489	GPR183/CD4/JUNB/CCR7/FOS/BATF/FOXP1	7	T1
GO:0001933	negative regulation of protein phosphorylation	7/62	416/17913	0.000566762	0.010587	0.00799381	SOCS3/CDKN1A/SAMSN1/SOCS1/EZR/DDIT4/DUSP4	7	T1
GO:0001819	positive regulation of cytokine production	7/62	446/17913	0.000854098	0.0145197	0.0109632	LTB/CD4/CCR7/CD40LG/CD2/ANXA1/BIRC3	7	T1
GO:0042100	B cell proliferation	6/62	71/17913	1.61e-07	2.49e-05	1.88e-05	IL7R/GPR183/TNFRSF4/CDKN1A/IRS2/CD40LG	6	T1
GO:0050864	regulation of B cell activation	6/62	110/17913	2.17e-06	0.000165405	0.000124891	GPR183/TNFRSF4/CDKN1A/SAMSN1/IRS2/ZFP36L2	6	T1
GO:0030183	B cell differentiation	6/62	113/17913	2.54e-06	0.000178067	0.000134451	GPR183/ITGB1/ZFP36L2/CD40LG/LGALS1/KLF6	6	T1
GO:0051384	response to glucocorticoid	6/62	139/17913	8.43e-06	0.000398821	0.000301133	CDKN1A/ZFP36L2/ANXA1/FOS/DDIT4/NR3C1	6	T1
GO:0031960	response to corticosteroid	6/62	155/17913	1.57e-05	0.000670555	0.000506308	CDKN1A/ZFP36L2/ANXA1/FOS/DDIT4/NR3C1	6	T1
GO:0033209	tumor necrosis factor-mediated signaling pathway	6/62	167/17913	2.4e-05	0.000932049	0.00070375	LTB/TNFRSF4/TNFRSF25/TRADD/CD40LG/BIRC3	6	T1
GO:0043123	positive regulation of I-kappaB kinase/NF-kappaB signaling	6/62	172/17913	2.83e-05	0.00107673	0.000812991	CD4/CCR7/S100A4/TRADD/BIRC3/LGALS1	6	T1
GO:0050707	regulation of cytokine secretion	6/62	201/17913	6.75e-05	0.00193809	0.00146337	CCR7/SOCS1/CD2/ANXA1/EZR/FOXP1	6	T1
GO:0043122	regulation of I-kappaB kinase/NF-kappaB signaling	6/62	224/17913	0.000122565	0.00311032	0.00234847	CD4/CCR7/S100A4/TRADD/BIRC3/LGALS1	6	T1
GO:0050663	cytokine secretion	6/62	230/17913	0.000141593	0.00349196	0.00263663	CCR7/SOCS1/CD2/ANXA1/EZR/FOXP1	6	T1
GO:0007249	I-kappaB kinase/NF-kappaB signaling	6/62	253/17913	0.000237288	0.00539599	0.00407428	CD4/CCR7/S100A4/TRADD/BIRC3/LGALS1	6	T1
GO:0070371	ERK1 and ERK2 cascade	6/62	289/17913	0.000482353	0.00982093	0.00741536	GPR183/CD4/CCR7/ZFP36L2/EZR/DUSP4	6	T1
GO:0002460	adaptive immune response based on somatic recombination of immune receptors built from immunoglobulin superfamily domains	6/62	295/17913	0.000537534	0.0103431	0.00780963	IL7R/CD4/CCR6/CD40LG/ANXA1/BATF	6	T1
GO:0001667	ameboidal-type cell migration	6/62	446/17913	0.00436481	0.0460409	0.0347635	TIMP1/ITGB1/ARID5B/CCR6/ANXA1/FOXP1	6	T1
GO:0050900	leukocyte migration	6/62	467/17913	0.00544784	0.0531957	0.0401658	GPR183/CCR7/ITGB1/CCR6/CD2/ANXA1	6	T1
GO:0050727	regulation of inflammatory response	6/62	479/17913	0.00614909	0.0582815	0.0440059	SOCS3/CCR7/TRADD/ANXA1/BIRC3/FOXP1	6	T1
GO:0098542	defense response to other organism	6/62	481/17913	0.0062721	0.0587297	0.0443443	CD4/SERINC5/BIRC3/DDIT4/BATF/FOXP1	6	T1
GO:0002312	B cell activation involved in immune response	5/62	71/17913	4.6e-06	0.000277967	0.000209881	GPR183/CCR6/CD40LG/BATF/LGALS1	5	T1
GO:0043367	CD4-positive, alpha-beta T cell differentiation	5/62	74/17913	5.65e-06	0.000302208	0.000228184	GPR183/SOCS1/ANXA1/BATF/FOXP1	5	T1
GO:0035710	CD4-positive, alpha-beta T cell activation	5/62	90/17913	1.48e-05	0.000646857	0.000488414	GPR183/SOCS1/ANXA1/BATF/FOXP1	5	T1
GO:0002377	immunoglobulin production	5/62	98/17913	2.24e-05	0.000910301	0.000687329	IL7R/TNFRSF4/CCR6/CD40LG/BATF	5	T1
GO:0046632	alpha-beta T cell differentiation	5/62	99/17913	2.35e-05	0.000932049	0.00070375	GPR183/SOCS1/ANXA1/BATF/FOXP1	5	T1
GO:0046631	alpha-beta T cell activation	5/62	133/17913	9.64e-05	0.00259787	0.00196154	GPR183/SOCS1/ANXA1/BATF/FOXP1	5	T1
GO:1902107	positive regulation of leukocyte differentiation	5/62	143/17913	0.00013568	0.00339393	0.00256261	IL7R/CD4/SOCS1/ANXA1/FOS	5	T1
GO:0045619	regulation of lymphocyte differentiation	5/62	164/17913	0.000256988	0.00569604	0.00430083	IL7R/ZFP36L2/SOCS1/CD2/ANXA1	5	T1
GO:1903708	positive regulation of hemopoiesis	5/62	182/17913	0.00041502	0.00865119	0.00653214	IL7R/CD4/SOCS1/ANXA1/FOS	5	T1
GO:0002440	production of molecular mediator of immune response	5/62	191/17913	0.000517253	0.0101765	0.00768385	IL7R/TNFRSF4/CCR6/CD40LG/BATF	5	T1
GO:1901654	response to ketone	5/62	191/17913	0.000517253	0.0101765	0.00768385	CCR7/CDKN1A/FOS/DDIT4/NR3C1	5	T1
GO:0051896	regulation of protein kinase B signaling	5/62	241/17913	0.00146605	0.0212153	0.0160188	CCR7/ITGB1/IRS2/ICOS/SESN3	5	T1
GO:0071383	cellular response to steroid hormone stimulus	5/62	243/17913	0.0015204	0.0217162	0.016397	ZFP36L2/ANXA1/DDIT4/FOXP1/NR3C1	5	T1
GO:0033673	negative regulation of kinase activity	5/62	244/17913	0.00154812	0.0217162	0.016397	SOCS3/CDKN1A/IRS2/SOCS1/DUSP4	5	T1
GO:0043491	protein kinase B signaling	5/62	268/17913	0.00233188	0.0302453	0.0228369	CCR7/ITGB1/IRS2/ICOS/SESN3	5	T1
GO:0070372	regulation of ERK1 and ERK2 cascade	5/62	271/17913	0.00244699	0.031505	0.023788	GPR183/CD4/CCR7/EZR/DUSP4	5	T1
GO:0051348	negative regulation of transferase activity	5/62	272/17913	0.00248626	0.031777	0.0239934	SOCS3/CDKN1A/IRS2/SOCS1/DUSP4	5	T1
GO:0031589	cell-substrate adhesion	5/62	322/17913	0.00509836	0.0508285	0.0383784	CCR7/ITGB1/S100A10/SPOCK2/LGALS1	5	T1
GO:0006401	RNA catabolic process	5/62	368/17913	0.00884547	0.0756938	0.0571531	ZC3H12D/VIM/ZFP36L2/RPLP0/RNASET2	5	T1
GO:0043900	regulation of multi-organism process	5/62	408/17913	0.0133817	0.094398	0.0712759	CD4/TIMP1/BIRC3/FOXP1/LGALS1	5	T1
GO:0051090	regulation of DNA-binding transcription factor activity	5/62	429/17913	0.0163006	0.108526	0.0819435	TNFRSF4/ARID5B/TRADD/CD40LG/FOS	5	T1
GO:0002768	immune response-regulating cell surface receptor signaling pathway	5/62	434/17913	0.0170536	0.112003	0.0845688	CD4/CCR7/EZR/FOS/FOXP1	5	T1
GO:0002697	regulation of immune effector process	5/62	441/17913	0.0181464	0.11553	0.0872317	IL7R/TNFRSF4/CD40LG/ANXA1/BIRC3	5	T1
GO:0002683	negative regulation of immune system process	5/62	451/17913	0.0197869	0.119885	0.0905202	IL7R/SAMSN1/SOCS1/ANXA1/EZR	5	T1
GO:0006875	cellular metal ion homeostasis	5/62	467/17913	0.0226103	0.131095	0.0989842	CD52/FTH1/CD4/TPT1/CCR7	5	T1
GO:1901652	response to peptide	5/62	491/17913	0.0273189	0.148416	0.112062	TIMP1/VIM/IRS2/SOCS1/SESN3	5	T1
GO:0009991	response to extracellular stimulus	5/62	498/17913	0.0288021	0.154228	0.116451	CD4/CDKN1A/AQP3/FOS/SESN3	5	T1
GO:0030890	positive regulation of B cell proliferation	4/62	39/17913	9.77e-06	0.000438701	0.000331244	GPR183/TNFRSF4/CDKN1A/IRS2	4	T1
GO:2000107	negative regulation of leukocyte apoptotic process	4/62	46/17913	1.9e-05	0.000793698	0.000599287	IL7R/CCR7/IRS2/FOXP1	4	T1
GO:0032655	regulation of interleukin-12 production	4/62	53/17913	3.35e-05	0.00124989	0.000943736	LTB/CCR7/CD40LG/FOXP1	4	T1
GO:0071385	cellular response to glucocorticoid stimulus	4/62	54/17913	3.61e-05	0.00129144	0.000975108	ZFP36L2/ANXA1/DDIT4/NR3C1	4	T1
GO:0031295	T cell costimulation	4/62	55/17913	3.89e-05	0.00133465	0.00100774	CCR7/CD40LG/ICOS/LGALS1	4	T1
GO:0032615	interleukin-12 production	4/62	55/17913	3.89e-05	0.00133465	0.00100774	LTB/CCR7/CD40LG/FOXP1	4	T1
GO:0031294	lymphocyte costimulation	4/62	56/17913	4.18e-05	0.00140604	0.00106164	CCR7/CD40LG/ICOS/LGALS1	4	T1
GO:0030888	regulation of B cell proliferation	4/62	57/17913	4.48e-05	0.00147979	0.00111733	GPR183/TNFRSF4/CDKN1A/IRS2	4	T1
GO:0042093	T-helper cell differentiation	4/62	58/17913	4.8e-05	0.00152765	0.00115347	GPR183/ANXA1/BATF/FOXP1	4	T1
GO:0071384	cellular response to corticosteroid stimulus	4/62	58/17913	4.8e-05	0.00152765	0.00115347	ZFP36L2/ANXA1/DDIT4/NR3C1	4	T1
GO:0002294	CD4-positive, alpha-beta T cell differentiation involved in immune response	4/62	60/17913	5.49e-05	0.00168546	0.00127262	GPR183/ANXA1/BATF/FOXP1	4	T1
GO:0002287	alpha-beta T cell activation involved in immune response	4/62	61/17913	5.86e-05	0.0017381	0.00131237	GPR183/ANXA1/BATF/FOXP1	4	T1
GO:0002293	alpha-beta T cell differentiation involved in immune response	4/62	61/17913	5.86e-05	0.0017381	0.00131237	GPR183/ANXA1/BATF/FOXP1	4	T1
GO:0002292	T cell differentiation involved in immune response	4/62	66/17913	7.98e-05	0.00221917	0.0016756	GPR183/ANXA1/BATF/FOXP1	4	T1
GO:0033077	T cell differentiation in thymus	4/62	69/17913	9.5e-05	0.00259787	0.00196154	IL7R/CCR7/CCR6/ZFP36L2	4	T1
GO:0050871	positive regulation of B cell activation	4/62	70/17913	0.000100533	0.00266718	0.00201388	GPR183/TNFRSF4/CDKN1A/IRS2	4	T1
GO:2000106	regulation of leukocyte apoptotic process	4/62	82/17913	0.000185925	0.00439939	0.00332179	IL7R/CCR7/IRS2/FOXP1	4	T1
GO:0002286	T cell activation involved in immune response	4/62	88/17913	0.000244071	0.00547909	0.00413703	GPR183/ANXA1/BATF/FOXP1	4	T1
GO:0030316	osteoclast differentiation	4/62	94/17913	0.000314279	0.00679387	0.00512976	GPR183/JUNB/FOS/FOXP1	4	T1
GO:0071887	leukocyte apoptotic process	4/62	103/17913	0.000445202	0.00917117	0.00692476	IL7R/CCR7/IRS2/FOXP1	4	T1
GO:0046718	viral entry into host cell	4/62	121/17913	0.000816693	0.0140368	0.0105986	TNFRSF4/CD4/ITGB1/LGALS1	4	T1
GO:0030260	entry into host cell	4/62	134/17913	0.00119382	0.0183055	0.0138217	TNFRSF4/CD4/ITGB1/LGALS1	4	T1
GO:0044409	entry into host	4/62	134/17913	0.00119382	0.0183055	0.0138217	TNFRSF4/CD4/ITGB1/LGALS1	4	T1
GO:0051806	entry into cell of other organism involved in symbiotic interaction	4/62	134/17913	0.00119382	0.0183055	0.0138217	TNFRSF4/CD4/ITGB1/LGALS1	4	T1
GO:0051828	entry into other organism involved in symbiotic interaction	4/62	134/17913	0.00119382	0.0183055	0.0138217	TNFRSF4/CD4/ITGB1/LGALS1	4	T1
GO:0045580	regulation of T cell differentiation	4/62	139/17913	0.00136681	0.0200043	0.0151044	IL7R/SOCS1/CD2/ANXA1	4	T1
GO:0008643	carbohydrate transport	4/62	148/17913	0.00172111	0.0235443	0.0177773	AQP3/IRS2/SLC2A3/EZR	4	T1
GO:0002819	regulation of adaptive immune response	4/62	150/17913	0.00180773	0.0243488	0.0183847	IL7R/CD4/SAMSN1/ANXA1	4	T1
GO:0001959	regulation of cytokine-mediated signaling pathway	4/62	170/17913	0.00284672	0.0353519	0.0266927	SOCS3/TRADD/SOCS1/BIRC3	4	T1
GO:0051897	positive regulation of protein kinase B signaling	4/62	173/17913	0.00303153	0.0371204	0.028028	CCR7/ITGB1/IRS2/ICOS	4	T1
GO:0042098	T cell proliferation	4/62	177/17913	0.0032905	0.038699	0.0292199	TNFRSF4/CD4/CD40LG/ANXA1	4	T1
GO:0060759	regulation of response to cytokine stimulus	4/62	183/17913	0.00370668	0.0418735	0.0316169	SOCS3/TRADD/SOCS1/BIRC3	4	T1
GO:0030595	leukocyte chemotaxis	4/62	188/17913	0.00407974	0.0449027	0.0339041	GPR183/CCR7/CCR6/ANXA1	4	T1
GO:0010810	regulation of cell-substrate adhesion	4/62	201/17913	0.00516703	0.0508285	0.0383784	CCR7/S100A10/SPOCK2/LGALS1	4	T1
GO:0051701	interaction with host	4/62	211/17913	0.00612493	0.0582815	0.0440059	TNFRSF4/CD4/ITGB1/LGALS1	4	T1
GO:0006469	negative regulation of protein kinase activity	4/62	222/17913	0.00730793	0.0656215	0.049548	SOCS3/CDKN1A/SOCS1/DUSP4	4	T1
GO:0050851	antigen receptor-mediated signaling pathway	4/62	224/17913	0.0075381	0.067343	0.0508478	CD4/CCR7/EZR/FOXP1	4	T1
GO:0042593	glucose homeostasis	4/62	227/17913	0.00789227	0.0690968	0.0521721	IRS2/PIM3/SESN3/LGALS1	4	T1
GO:0033500	carbohydrate homeostasis	4/62	228/17913	0.00801272	0.0697254	0.0526467	IRS2/PIM3/SESN3/LGALS1	4	T1
GO:0048872	homeostasis of number of cells	4/62	241/17913	0.00969005	0.0810112	0.0611681	IL7R/GPR183/CCR7/ANXA1	4	T1
GO:0006310	DNA recombination	4/62	244/17913	0.0101072	0.0819496	0.0618766	IL7R/CCR6/CD40LG/BATF	4	T1
GO:0050730	regulation of peptidyl-tyrosine phosphorylation	4/62	245/17913	0.0102488	0.0821639	0.0620384	SOCS3/CD4/SAMSN1/SOCS1	4	T1
GO:0031668	cellular response to extracellular stimulus	4/62	251/17913	0.0111254	0.0843318	0.0636754	CDKN1A/AQP3/FOS/SESN3	4	T1
GO:0060326	cell chemotaxis	4/62	253/17913	0.0114281	0.0855355	0.0645842	GPR183/CCR7/CCR6/ANXA1	4	T1
GO:0050714	positive regulation of protein secretion	4/62	256/17913	0.011892	0.0876675	0.066194	TNFRSF4/IRS2/CD2/EZR	4	T1
GO:0007162	negative regulation of cell adhesion	4/62	271/17913	0.0143933	0.0996153	0.0752152	FXYD5/SOCS1/ANXA1/LGALS1	4	T1
GO:0002793	positive regulation of peptide secretion	4/62	275/17913	0.0151125	0.102566	0.0774432	TNFRSF4/IRS2/CD2/EZR	4	T1
GO:1990778	protein localization to cell periphery	4/62	276/17913	0.0152958	0.103012	0.0777796	ITGB1/MAL/S100A10/EZR	4	T1
GO:0051235	maintenance of location	4/62	286/17913	0.0172067	0.112003	0.0845688	FTH1/CD4/CCR7/EZR	4	T1
GO:0002449	lymphocyte mediated immunity	4/62	293/17913	0.0186295	0.116256	0.0877799	IL7R/CCR6/CD40LG/BATF	4	T1
GO:0032496	response to lipopolysaccharide	4/62	295/17913	0.0190492	0.116626	0.0880594	CCR7/VIM/FOS/FOXP1	4	T1
GO:0009416	response to light stimulus	4/62	307/17913	0.0216904	0.128746	0.0972103	ITGB1/CDKN1A/PPP1CB/FOS	4	T1
GO:0002237	response to molecule of bacterial origin	4/62	309/17913	0.0221514	0.128861	0.0972975	CCR7/VIM/FOS/FOXP1	4	T1
GO:0032535	regulation of cellular component size	4/62	315/17913	0.0235705	0.136211	0.102847	IL7R/CCR7/TMEM123/EZR	4	T1
GO:0007568	aging	4/62	318/17913	0.0243004	0.139508	0.105336	TIMP1/LMNA/CDKN1A/FOS	4	T1
GO:0071496	cellular response to external stimulus	4/62	320/17913	0.0247945	0.141418	0.106778	CDKN1A/AQP3/FOS/SESN3	4	T1
GO:0009615	response to virus	4/62	323/17913	0.0255472	0.142517	0.107608	TPT1/SERINC5/BIRC3/DDIT4	4	T1
GO:0019058	viral life cycle	4/62	324/17913	0.0258011	0.142517	0.107608	TNFRSF4/CD4/ITGB1/LGALS1	4	T1
GO:0006402	mRNA catabolic process	4/62	338/17913	0.0295175	0.156148	0.117901	ZC3H12D/VIM/ZFP36L2/RPLP0	4	T1
GO:0031331	positive regulation of cellular catabolic process	4/62	341/17913	0.0303532	0.159605	0.120511	ZC3H12D/IRS2/ZFP36L2/EZR	4	T1
GO:0018108	peptidyl-tyrosine phosphorylation	4/62	346/17913	0.0317772	0.164135	0.123931	SOCS3/CD4/SAMSN1/SOCS1	4	T1
GO:0018212	peptidyl-tyrosine modification	4/62	349/17913	0.0326503	0.164848	0.12447	SOCS3/CD4/SAMSN1/SOCS1	4	T1
GO:0010631	epithelial cell migration	4/62	354/17913	0.0341367	0.164848	0.12447	ITGB1/CCR6/ANXA1/FOXP1	4	T1
GO:0090132	epithelium migration	4/62	357/17913	0.0350473	0.16635	0.125604	ITGB1/CCR6/ANXA1/FOXP1	4	T1
GO:0090130	tissue migration	4/62	363/17913	0.036911	0.16635	0.125604	ITGB1/CCR6/ANXA1/FOXP1	4	T1
GO:1901653	cellular response to peptide	4/62	364/17913	0.0372271	0.16635	0.125604	VIM/IRS2/SOCS1/SESN3	4	T1
GO:0052548	regulation of endopeptidase activity	4/62	370/17913	0.0391569	0.167818	0.126712	TIMP1/TRADD/BIRC3/SPOCK2	4	T1
GO:0006874	cellular calcium ion homeostasis	4/62	375/17913	0.0408083	0.167818	0.126712	CD52/CD4/TPT1/CCR7	4	T1
GO:0014706	striated muscle tissue development	4/62	376/17913	0.0411434	0.167818	0.126712	LMNA/ITGB1/FOS/NDUFV2	4	T1
GO:1903532	positive regulation of secretion by cell	4/62	381/17913	0.0428421	0.167818	0.126712	TNFRSF4/IRS2/CD2/EZR	4	T1
GO:0055074	calcium ion homeostasis	4/62	388/17913	0.0452867	0.171122	0.129207	CD52/CD4/TPT1/CCR7	4	T1
GO:0070482	response to oxygen levels	4/62	389/17913	0.0456422	0.171122	0.129207	LMNA/CDKN1A/AQP3/DDIT4	4	T1
GO:0009896	positive regulation of catabolic process	4/62	392/17913	0.0467183	0.171122	0.129207	ZC3H12D/IRS2/ZFP36L2/EZR	4	T1
GO:0060537	muscle tissue development	4/62	392/17913	0.0467183	0.171122	0.129207	LMNA/ITGB1/FOS/NDUFV2	4	T1
GO:0072503	cellular divalent inorganic cation homeostasis	4/62	392/17913	0.0467183	0.171122	0.129207	CD52/CD4/TPT1/CCR7	4	T1
GO:2001233	regulation of apoptotic signaling pathway	4/62	397/17913	0.0485433	0.173682	0.13114	TPT1/LMNA/MAL/TRADD	4	T1
GO:0052547	regulation of peptidase activity	4/62	398/17913	0.048913	0.173682	0.13114	TIMP1/TRADD/BIRC3/SPOCK2	4	T1
GO:0002429	immune response-activating cell surface receptor signaling pathway	4/62	399/17913	0.0492843	0.173682	0.13114	CD4/CCR7/EZR/FOXP1	4	T1
GO:0006644	phospholipid metabolic process	4/62	402/17913	0.0504076	0.173682	0.13114	SOCS3/CCR7/SERINC5/SOCS1	4	T1
GO:0019216	regulation of lipid metabolic process	4/62	402/17913	0.0504076	0.173682	0.13114	SOCS3/CCR7/IRS2/SOCS1	4	T1
GO:0051222	positive regulation of protein transport	4/62	403/17913	0.0507852	0.173682	0.13114	TNFRSF4/IRS2/CD2/EZR	4	T1
GO:0043434	response to peptide hormone	4/62	404/17913	0.0511644	0.174637	0.131861	TIMP1/IRS2/SOCS1/SESN3	4	T1
GO:0051047	positive regulation of secretion	4/62	409/17913	0.0530838	0.177688	0.134164	TNFRSF4/IRS2/CD2/EZR	4	T1
GO:0043588	skin development	4/62	412/17913	0.0542542	0.177901	0.134325	LTB/TRADD/AQP3/ANXA1	4	T1
GO:0072507	divalent inorganic cation homeostasis	4/62	412/17913	0.0542542	0.177901	0.134325	CD52/CD4/TPT1/CCR7	4	T1
GO:0006816	calcium ion transport	4/62	415/17913	0.0554387	0.181445	0.137002	CD4/TPT1/CCR7/AHNAK	4	T1
GO:0009314	response to radiation	4/62	435/17913	0.0636937	0.187394	0.141493	ITGB1/CDKN1A/PPP1CB/FOS	4	T1
GO:1904951	positive regulation of establishment of protein localization	4/62	440/17913	0.0658541	0.189914	0.143396	TNFRSF4/IRS2/CD2/EZR	4	T1
GO:0090066	regulation of anatomical structure size	4/62	442/17913	0.066729	0.189914	0.143396	IL7R/CCR7/TMEM123/EZR	4	T1
GO:0070838	divalent metal ion transport	4/62	454/17913	0.0721064	0.195809	0.147847	CD4/TPT1/CCR7/AHNAK	4	T1
GO:0072511	divalent inorganic cation transport	4/62	458/17913	0.0739474	0.196482	0.148355	CD4/TPT1/CCR7/AHNAK	4	T1
GO:0031667	response to nutrient levels	4/62	466/17913	0.0777013	0.203371	0.153556	CD4/CDKN1A/AQP3/SESN3	4	T1
GO:0043312	neutrophil degranulation	4/62	485/17913	0.0869961	0.210984	0.159305	FTH1/S100A11/RNASET2/SLC2A3	4	T1
GO:0002283	neutrophil activation involved in immune response	4/62	488/17913	0.0885118	0.213045	0.160861	FTH1/S100A11/RNASET2/SLC2A3	4	T1
GO:0002446	neutrophil mediated immunity	4/62	499/17913	0.0941794	0.218132	0.164702	FTH1/S100A11/RNASET2/SLC2A3	4	T1
GO:0042119	neutrophil activation	4/62	499/17913	0.0941794	0.218132	0.164702	FTH1/S100A11/RNASET2/SLC2A3	4	T1
GO:0043410	positive regulation of MAPK cascade	4/62	499/17913	0.0941794	0.218132	0.164702	GPR183/CD4/CCR7/CD40LG	4	T1
GO:0031579	membrane raft organization	3/62	23/17913	6.66e-05	0.00193809	0.00146337	MAL/S100A10/CD2	3	T1
GO:0002407	dendritic cell chemotaxis	3/62	24/17913	7.59e-05	0.00214295	0.00161805	GPR183/CCR7/CCR6	3	T1
GO:0036336	dendritic cell migration	3/62	27/17913	0.000108847	0.00284466	0.00214788	GPR183/CCR7/CCR6	3	T1
GO:0070229	negative regulation of lymphocyte apoptotic process	3/62	28/17913	0.000121609	0.00311032	0.00234847	IL7R/IRS2/FOXP1	3	T1
GO:0038111	interleukin-7-mediated signaling pathway	3/62	30/17913	0.00014997	0.0036472	0.00275384	IL7R/IRS2/SOCS1	3	T1
GO:0032735	positive regulation of interleukin-12 production	3/62	34/17913	0.000218871	0.00504268	0.00380751	LTB/CCR7/CD40LG	3	T1
GO:0098760	response to interleukin-7	3/62	41/17913	0.000383235	0.00808488	0.00610454	IL7R/IRS2/SOCS1	3	T1
GO:0098761	cellular response to interleukin-7	3/62	41/17913	0.000383235	0.00808488	0.00610454	IL7R/IRS2/SOCS1	3	T1
GO:0045058	T cell selection	3/62	45/17913	0.000505143	0.0101667	0.00767646	CD4/CCR7/BATF	3	T1
GO:0002204	somatic recombination of immunoglobulin genes involved in immune response	3/62	47/17913	0.000574396	0.010587	0.00799381	CCR6/CD40LG/BATF	3	T1
GO:0002208	somatic diversification of immunoglobulins involved in immune response	3/62	47/17913	0.000574396	0.010587	0.00799381	CCR6/CD40LG/BATF	3	T1
GO:0045190	isotype switching	3/62	47/17913	0.000574396	0.010587	0.00799381	CCR6/CD40LG/BATF	3	T1
GO:0016447	somatic recombination of immunoglobulin gene segments	3/62	49/17913	0.000649443	0.0117235	0.00885188	CCR6/CD40LG/BATF	3	T1
GO:0050732	negative regulation of peptidyl-tyrosine phosphorylation	3/62	50/17913	0.0006892	0.0123142	0.00929791	SOCS3/SAMSN1/SOCS1	3	T1
GO:0070228	regulation of lymphocyte apoptotic process	3/62	51/17913	0.000730476	0.0129198	0.00975522	IL7R/IRS2/FOXP1	3	T1
GO:0043551	regulation of phosphatidylinositol 3-kinase activity	3/62	53/17913	0.00081768	0.0140368	0.0105986	SOCS3/CCR7/SOCS1	3	T1
GO:0032663	regulation of interleukin-2 production	3/62	54/17913	0.000863653	0.0145409	0.0109792	CD4/ANXA1/EZR	3	T1
GO:0002381	immunoglobulin production involved in immunoglobulin mediated immune response	3/62	55/17913	0.000911236	0.0149119	0.0112593	CCR6/CD40LG/BATF	3	T1
GO:0016445	somatic diversification of immunoglobulins	3/62	55/17913	0.000911236	0.0149119	0.0112593	CCR6/CD40LG/BATF	3	T1
GO:0002562	somatic diversification of immune receptors via germline recombination within a single locus	3/62	60/17913	0.00117407	0.0183055	0.0138217	CCR6/CD40LG/BATF	3	T1
GO:0016444	somatic cell DNA recombination	3/62	60/17913	0.00117407	0.0183055	0.0138217	CCR6/CD40LG/BATF	3	T1
GO:0032623	interleukin-2 production	3/62	62/17913	0.00129123	0.0193243	0.0145909	CD4/ANXA1/EZR	3	T1
GO:0043550	regulation of lipid kinase activity	3/62	62/17913	0.00129123	0.0193243	0.0145909	SOCS3/CCR7/SOCS1	3	T1
GO:0050854	regulation of antigen receptor-mediated signaling pathway	3/62	63/17913	0.00135246	0.0200043	0.0151044	CCR7/EZR/FOXP1	3	T1
GO:0002200	somatic diversification of immune receptors	3/62	67/17913	0.00161559	0.0222748	0.0168187	CCR6/CD40LG/BATF	3	T1
GO:0070227	lymphocyte apoptotic process	3/62	67/17913	0.00161559	0.0222748	0.0168187	IL7R/IRS2/FOXP1	3	T1
GO:0051651	maintenance of location in cell	3/62	72/17913	0.00198683	0.0261574	0.0197503	FTH1/CD4/EZR	3	T1
GO:0045582	positive regulation of T cell differentiation	3/62	83/17913	0.00297948	0.0367399	0.0277407	IL7R/SOCS1/ANXA1	3	T1
GO:1903725	regulation of phospholipid metabolic process	3/62	86/17913	0.00329435	0.038699	0.0292199	SOCS3/CCR7/SOCS1	3	T1
GO:0072676	lymphocyte migration	3/62	87/17913	0.00340366	0.038953	0.0294118	GPR183/CCR7/CCR6	3	T1
GO:1904894	positive regulation of STAT cascade	3/62	88/17913	0.00351518	0.039968	0.0301781	IL7R/SOCS3/SOCS1	3	T1
GO:0042102	positive regulation of T cell proliferation	3/62	90/17913	0.00374487	0.0420337	0.0317379	CD4/CD40LG/ANXA1	3	T1
GO:0008630	intrinsic apoptotic signaling pathway in response to DNA damage	3/62	92/17913	0.00398353	0.0444278	0.0335455	TPT1/CDKN1A/DDIT4	3	T1
GO:0045621	positive regulation of lymphocyte differentiation	3/62	93/17913	0.00410626	0.0449027	0.0339041	IL7R/SOCS1/ANXA1	3	T1
GO:1990823	response to leukemia inhibitory factor	3/62	94/17913	0.00423127	0.0449027	0.0339041	SOCS3/ARID5B/SPOCK2	3	T1
GO:1990830	cellular response to leukemia inhibitory factor	3/62	94/17913	0.00423127	0.0449027	0.0339041	SOCS3/ARID5B/SPOCK2	3	T1
GO:0032652	regulation of interleukin-1 production	3/62	96/17913	0.00448818	0.0466874	0.0352517	CCR7/ANXA1/FOXP1	3	T1
GO:0032612	interleukin-1 production	3/62	108/17913	0.00622774	0.0586278	0.0442673	CCR7/ANXA1/FOXP1	3	T1
GO:0010811	positive regulation of cell-substrate adhesion	3/62	110/17913	0.00655149	0.060061	0.0453495	CCR7/S100A10/SPOCK2	3	T1
GO:0002761	regulation of myeloid leukocyte differentiation	3/62	117/17913	0.0077629	0.0683057	0.0515747	CD4/FOS/FOXP1	3	T1
GO:0051592	response to calcium ion	3/62	126/17913	0.00950302	0.0807757	0.0609902	JUNB/AQP3/FOS	3	T1
GO:0008286	insulin receptor signaling pathway	3/62	128/17913	0.00991811	0.0815334	0.0615624	IRS2/SOCS1/SESN3	3	T1
GO:0051291	protein heterooligomerization	3/62	128/17913	0.00991811	0.0815334	0.0615624	S100A10/TRADD/BIRC3	3	T1
GO:0071333	cellular response to glucose stimulus	3/62	128/17913	0.00991811	0.0815334	0.0615624	IRS2/PIM3/LGALS1	3	T1
GO:1904892	regulation of STAT cascade	3/62	129/17913	0.0101296	0.0819496	0.0618766	IL7R/SOCS3/SOCS1	3	T1
GO:0071331	cellular response to hexose stimulus	3/62	130/17913	0.0103436	0.0821639	0.0620384	IRS2/PIM3/LGALS1	3	T1
GO:0071326	cellular response to monosaccharide stimulus	3/62	131/17913	0.0105603	0.0821639	0.0620384	IRS2/PIM3/LGALS1	3	T1
GO:0051250	negative regulation of lymphocyte activation	3/62	132/17913	0.0107797	0.0831507	0.0627836	SAMSN1/SOCS1/ANXA1	3	T1
GO:0002822	regulation of adaptive immune response based on somatic recombination of immune receptors built from immunoglobulin superfamily domains	3/62	135/17913	0.0114535	0.0855355	0.0645842	IL7R/CD4/ANXA1	3	T1
GO:0050709	negative regulation of protein secretion	3/62	137/17913	0.011916	0.0876675	0.066194	ANXA1/EZR/PIM3	3	T1
GO:0010675	regulation of cellular carbohydrate metabolic process	3/62	138/17913	0.0121512	0.089024	0.0672182	IRS2/PPP1CB/DDIT4	3	T1
GO:0071322	cellular response to carbohydrate stimulus	3/62	139/17913	0.0123891	0.090345	0.0682156	IRS2/PIM3/LGALS1	3	T1
GO:0001678	cellular glucose homeostasis	3/62	142/17913	0.0131188	0.0941436	0.0710838	IRS2/PIM3/LGALS1	3	T1
GO:0002792	negative regulation of peptide secretion	3/62	142/17913	0.0131188	0.0941436	0.0710838	ANXA1/EZR/PIM3	3	T1
GO:0050777	negative regulation of immune response	3/62	143/17913	0.0133674	0.094398	0.0712759	IL7R/SAMSN1/ANXA1	3	T1
GO:0043467	regulation of generation of precursor metabolites and energy	3/62	144/17913	0.0136187	0.0950054	0.0717345	IRS2/PPP1CB/DDIT4	3	T1
GO:0042129	regulation of T cell proliferation	3/62	149/17913	0.0149156	0.102381	0.0773039	CD4/CD40LG/ANXA1	3	T1
GO:0097696	STAT cascade	3/62	150/17913	0.0151832	0.102648	0.0775047	IL7R/SOCS3/SOCS1	3	T1
GO:2001236	regulation of extrinsic apoptotic signaling pathway	3/62	151/17913	0.0154534	0.103674	0.0782797	LMNA/MAL/TRADD	3	T1
GO:0071346	cellular response to interferon-gamma	3/62	153/17913	0.016002	0.106945	0.0807492	SOCS3/VIM/SOCS1	3	T1
GO:0043488	regulation of mRNA stability	3/62	158/17913	0.0174212	0.11298	0.0853061	ZC3H12D/VIM/ZFP36L2	3	T1
GO:0002695	negative regulation of leukocyte activation	3/62	163/17913	0.0189088	0.116256	0.0877799	SAMSN1/SOCS1/ANXA1	3	T1
GO:0043487	regulation of RNA stability	3/62	163/17913	0.0189088	0.116256	0.0877799	ZC3H12D/VIM/ZFP36L2	3	T1
GO:0022408	negative regulation of cell-cell adhesion	3/62	169/17913	0.0207844	0.12421	0.0937857	FXYD5/SOCS1/ANXA1	3	T1
GO:0016064	immunoglobulin mediated immune response	3/62	171/17913	0.0214317	0.127642	0.0963772	CCR6/CD40LG/BATF	3	T1
GO:0010634	positive regulation of epithelial cell migration	3/62	173/17913	0.0220899	0.128861	0.0972975	CCR6/ANXA1/FOXP1	3	T1
GO:0019724	B cell mediated immunity	3/62	173/17913	0.0220899	0.128861	0.0972975	CCR6/CD40LG/BATF	3	T1
GO:0034341	response to interferon-gamma	3/62	173/17913	0.0220899	0.128861	0.0972975	SOCS3/VIM/SOCS1	3	T1
GO:0061013	regulation of mRNA catabolic process	3/62	178/17913	0.0237836	0.136991	0.103436	ZC3H12D/VIM/ZFP36L2	3	T1
GO:0050852	T cell receptor signaling pathway	3/62	180/17913	0.0244804	0.140082	0.10577	CD4/CCR7/EZR	3	T1
GO:0002685	regulation of leukocyte migration	3/62	186/17913	0.0266368	0.14621	0.110397	CCR7/CCR6/ANXA1	3	T1
GO:0070374	positive regulation of ERK1 and ERK2 cascade	3/62	186/17913	0.0266368	0.14621	0.110397	GPR183/CD4/CCR7	3	T1
GO:0050866	negative regulation of cell activation	3/62	187/17913	0.0270059	0.147773	0.111577	SAMSN1/SOCS1/ANXA1	3	T1
GO:0019722	calcium-mediated signaling	3/62	188/17913	0.0273776	0.148416	0.112062	CD4/RCAN3/CCR6	3	T1
GO:0051224	negative regulation of protein transport	3/62	189/17913	0.0277522	0.149904	0.113186	ANXA1/EZR/PIM3	3	T1
GO:0009749	response to glucose	3/62	190/17913	0.0281294	0.151088	0.11408	IRS2/PIM3/LGALS1	3	T1
GO:0007565	female pregnancy	3/62	193/17913	0.0292777	0.155349	0.117297	JUNB/TIMP1/FOS	3	T1
GO:1904950	negative regulation of establishment of protein localization	3/62	193/17913	0.0292777	0.155349	0.117297	ANXA1/EZR/PIM3	3	T1
GO:0009746	response to hexose	3/62	195/17913	0.0300569	0.158523	0.119694	IRS2/PIM3/LGALS1	3	T1
GO:0032869	cellular response to insulin stimulus	3/62	197/17913	0.030847	0.161233	0.12174	IRS2/SOCS1/SESN3	3	T1
GO:0006109	regulation of carbohydrate metabolic process	3/62	198/17913	0.0312462	0.162826	0.122943	IRS2/PPP1CB/DDIT4	3	T1
GO:0002064	epithelial cell development	3/62	199/17913	0.0316481	0.163952	0.123793	VIM/CDKN1A/EZR	3	T1
GO:0034284	response to monosaccharide	3/62	200/17913	0.0320528	0.164628	0.124304	IRS2/PIM3/LGALS1	3	T1
GO:1903531	negative regulation of secretion by cell	3/62	202/17913	0.0328702	0.164848	0.12447	ANXA1/EZR/PIM3	3	T1
GO:0097191	extrinsic apoptotic signaling pathway	3/62	213/17913	0.0375601	0.166501	0.125718	LMNA/MAL/TRADD	3	T1
GO:0007160	cell-matrix adhesion	3/62	214/17913	0.0380027	0.167818	0.126712	CCR7/ITGB1/S100A10	3	T1
GO:0031669	cellular response to nutrient levels	3/62	220/17913	0.0407143	0.167818	0.126712	CDKN1A/AQP3/SESN3	3	T1
GO:0032872	regulation of stress-activated MAPK cascade	3/62	220/17913	0.0407143	0.167818	0.126712	CCR7/CD40LG/EZR	3	T1
GO:0048738	cardiac muscle tissue development	3/62	221/17913	0.0411755	0.167818	0.126712	LMNA/ITGB1/NDUFV2	3	T1
GO:0045444	fat cell differentiation	3/62	222/17913	0.0416395	0.167818	0.126712	ARID5B/ZFP36L2/SOCS1	3	T1
GO:0070302	regulation of stress-activated protein kinase signaling cascade	3/62	222/17913	0.0416395	0.167818	0.126712	CCR7/CD40LG/EZR	3	T1
GO:2001234	negative regulation of apoptotic signaling pathway	3/62	223/17913	0.0421061	0.167818	0.126712	TPT1/LMNA/TRADD	3	T1
GO:0009743	response to carbohydrate	3/62	224/17913	0.0425753	0.167818	0.126712	IRS2/PIM3/LGALS1	3	T1
GO:0044706	multi-multicellular organism process	3/62	225/17913	0.0430472	0.167818	0.126712	JUNB/TIMP1/FOS	3	T1
GO:0051048	negative regulation of secretion	3/62	226/17913	0.0435218	0.167818	0.126712	ANXA1/EZR/PIM3	3	T1
GO:0000302	response to reactive oxygen species	3/62	230/17913	0.0454463	0.171122	0.129207	CCR7/FOS/SESN3	3	T1
GO:0051607	defense response to virus	3/62	231/17913	0.045934	0.171122	0.129207	SERINC5/BIRC3/DDIT4	3	T1
GO:0097305	response to alcohol	3/62	232/17913	0.0464243	0.171122	0.129207	CCR7/CDKN1A/FOS	3	T1
GO:0071560	cellular response to transforming growth factor beta stimulus	3/62	233/17913	0.0469172	0.171122	0.129207	ZFP36L2/FOS/NR3C1	3	T1
GO:0072659	protein localization to plasma membrane	3/62	237/17913	0.048915	0.173682	0.13114	ITGB1/S100A10/EZR	3	T1
GO:0071559	response to transforming growth factor beta	3/62	239/17913	0.0499294	0.173682	0.13114	ZFP36L2/FOS/NR3C1	3	T1
GO:0045637	regulation of myeloid cell differentiation	3/62	250/17913	0.0556921	0.181596	0.137115	CD4/FOS/FOXP1	3	T1
GO:0032868	response to insulin	3/62	252/17913	0.0567728	0.183306	0.138406	IRS2/SOCS1/SESN3	3	T1
GO:0046883	regulation of hormone secretion	3/62	254/17913	0.0578636	0.184552	0.139347	IRS2/ANXA1/PIM3	3	T1
GO:0007204	positive regulation of cytosolic calcium ion concentration	3/62	255/17913	0.0584127	0.185291	0.139905	CD52/CD4/CCR7	3	T1
GO:0044262	cellular carbohydrate metabolic process	3/62	256/17913	0.0589644	0.186703	0.140971	IRS2/PPP1CB/DDIT4	3	T1
GO:0051091	positive regulation of DNA-binding transcription factor activity	3/62	257/17913	0.0595185	0.186926	0.14114	ARID5B/TRADD/CD40LG	3	T1
GO:0015980	energy derivation by oxidation of organic compounds	3/62	264/17913	0.0634664	0.187394	0.141493	IRS2/PPP1CB/NDUFV2	3	T1
GO:0072331	signal transduction by p53 class mediator	3/62	264/17913	0.0634664	0.187394	0.141493	CDKN1A/DDIT4/BATF	3	T1
GO:0051403	stress-activated MAPK cascade	3/62	271/17913	0.0675337	0.191036	0.144243	CCR7/CD40LG/EZR	3	T1
GO:0030522	intracellular receptor signaling pathway	3/62	272/17913	0.0681243	0.192396	0.14527	BIRC3/FOXP1/NR3C1	3	T1
GO:0043542	endothelial cell migration	3/62	275/17913	0.0699106	0.193277	0.145936	ITGB1/ANXA1/FOXP1	3	T1
GO:1903311	regulation of mRNA metabolic process	3/62	275/17913	0.0699106	0.193277	0.145936	ZC3H12D/VIM/ZFP36L2	3	T1
GO:0006959	humoral immune response	3/62	276/17913	0.0705108	0.193277	0.145936	GPR183/CCR7/CCR6	3	T1
GO:0005996	monosaccharide metabolic process	3/62	277/17913	0.0711133	0.193955	0.146447	IRS2/SLC2A3/PPP1CB	3	T1
GO:0097193	intrinsic apoptotic signaling pathway	3/62	277/17913	0.0711133	0.193955	0.146447	TPT1/CDKN1A/DDIT4	3	T1
GO:0031098	stress-activated protein kinase signaling cascade	3/62	278/17913	0.0717182	0.195301	0.147463	CCR7/CD40LG/EZR	3	T1
GO:0051480	regulation of cytosolic calcium ion concentration	3/62	289/17913	0.078525	0.204523	0.154426	CD52/CD4/CCR7	3	T1
GO:0010632	regulation of epithelial cell migration	3/62	294/17913	0.0817103	0.207528	0.156696	CCR6/ANXA1/FOXP1	3	T1
GO:0071375	cellular response to peptide hormone stimulus	3/62	297/17913	0.0836483	0.208356	0.157321	IRS2/SOCS1/SESN3	3	T1
GO:0046879	hormone secretion	3/62	301/17913	0.0862632	0.209787	0.158401	IRS2/ANXA1/PIM3	3	T1
GO:0009914	hormone transport	3/62	311/17913	0.0929518	0.216723	0.163638	IRS2/ANXA1/PIM3	3	T1
GO:0006470	protein dephosphorylation	3/62	313/17913	0.0943151	0.218158	0.164722	RCAN3/PPP1CB/DUSP4	3	T1
GO:0007265	Ras protein signal transduction	3/62	324/17913	0.10196	0.224915	0.169824	ITGB1/CDKN1A/IRS2	3	T1
GO:0007015	actin filament organization	3/62	325/17913	0.102667	0.226016	0.170655	CCR7/S100A10/EZR	3	T1
GO:0001101	response to acid chemical	3/62	330/17913	0.106233	0.228519	0.172545	CCR7/AQP3/SOCS1	3	T1
GO:0030198	extracellular matrix organization	3/62	334/17913	0.109121	0.231542	0.174827	TIMP1/ITGB1/SPOCK2	3	T1
GO:0010038	response to metal ion	3/62	335/17913	0.109847	0.232298	0.175398	JUNB/AQP3/FOS	3	T1
GO:0043547	positive regulation of GTPase activity	3/62	339/17913	0.112773	0.236177	0.178327	CCR7/ITGB1/S100A10	3	T1
GO:0001701	in utero embryonic development	3/62	342/17913	0.114988	0.237153	0.179064	SOCS3/JUNB/ITGB1	3	T1
GO:0001666	response to hypoxia	3/62	354/17913	0.124009	0.245633	0.185467	LMNA/AQP3/DDIT4	3	T1
GO:0019932	second-messenger-mediated signaling	3/62	360/17913	0.128615	0.249776	0.188595	CD4/RCAN3/CCR6	3	T1
GO:0043687	post-translational protein modification	3/62	360/17913	0.128615	0.249776	0.188595	SOCS3/TIMP1/LGALS1	3	T1
GO:0035690	cellular response to drug	3/62	362/17913	0.130165	0.250459	0.189111	VIM/DDIT4/NR3C1	3	T1
GO:0036293	response to decreased oxygen levels	3/62	365/17913	0.132501	0.251921	0.190215	LMNA/AQP3/DDIT4	3	T1
GO:0043062	extracellular structure organization	3/62	387/17913	0.150076	0.27093	0.204567	TIMP1/ITGB1/SPOCK2	3	T1
GO:0007409	axonogenesis	3/62	393/17913	0.154998	0.275814	0.208255	ITGB1/IRS2/EZR	3	T1
GO:0006417	regulation of translation	3/62	397/17913	0.158307	0.279232	0.210836	ZC3H12D/VIM/ZFP36L2	3	T1
GO:0051052	regulation of DNA metabolic process	3/62	403/17913	0.163313	0.283129	0.213779	IL7R/S100A11/CDKN1A	3	T1
GO:0043087	regulation of GTPase activity	3/62	410/17913	0.169213	0.289348	0.218474	CCR7/ITGB1/S100A10	3	T1
GO:0048608	reproductive structure development	3/62	426/17913	0.182932	0.303041	0.228813	SOCS3/JUNB/ARID5B	3	T1
GO:0061458	reproductive system development	3/62	429/17913	0.185538	0.305049	0.23033	SOCS3/JUNB/ARID5B	3	T1
GO:0022604	regulation of cell morphogenesis	3/62	430/17913	0.186409	0.306194	0.231194	S100A10/ANXA1/EZR	3	T1
GO:0023061	signal release	3/62	433/17913	0.189029	0.308106	0.232638	IRS2/ANXA1/PIM3	3	T1
GO:0061564	axon development	3/62	438/17913	0.193417	0.310994	0.234818	ITGB1/IRS2/EZR	3	T1
GO:0062012	regulation of small molecule metabolic process	3/62	439/17913	0.194297	0.311837	0.235455	IRS2/PPP1CB/DDIT4	3	T1
GO:0045088	regulation of innate immune response	3/62	440/17913	0.195179	0.312966	0.236307	SOCS3/SOCS1/BIRC3	3	T1
GO:0006979	response to oxidative stress	3/62	442/17913	0.196946	0.313787	0.236927	CCR7/FOS/SESN3	3	T1
GO:0008544	epidermis development	3/62	452/17913	0.205839	0.320661	0.242118	TRADD/AQP3/ANXA1	3	T1
GO:0034248	regulation of cellular amide metabolic process	3/62	452/17913	0.205839	0.320661	0.242118	ZC3H12D/VIM/ZFP36L2	3	T1
GO:0072594	establishment of protein localization to organelle	3/62	452/17913	0.205839	0.320661	0.242118	LMNA/CDKN1A/RPLP0	3	T1
GO:0016311	dephosphorylation	3/62	458/17913	0.21122	0.324711	0.245176	RCAN3/PPP1CB/DUSP4	3	T1
GO:0007264	small GTPase mediated signal transduction	3/62	465/17913	0.217539	0.33167	0.25043	ITGB1/CDKN1A/IRS2	3	T1
GO:0001501	skeletal system development	3/62	479/17913	0.230296	0.342607	0.258688	TIMP1/ARID5B/FOXP1	3	T1
GO:0071900	regulation of protein serine/threonine kinase activity	3/62	479/17913	0.230296	0.342607	0.258688	CDKN1A/CD40LG/DUSP4	3	T1
GO:0048667	cell morphogenesis involved in neuron differentiation	3/62	500/17913	0.249694	0.359551	0.271481	ITGB1/IRS2/EZR	3	T1
GO:0072610	interleukin-12 secretion	2/62	11/17913	0.000635391	0.0115893	0.00875057	CCR7/FOXP1	2	T1
GO:0002903	negative regulation of B cell apoptotic process	2/62	12/17913	0.000760771	0.0133211	0.0100582	IRS2/FOXP1	2	T1
GO:0042532	negative regulation of tyrosine phosphorylation of STAT protein	2/62	13/17913	0.000897089	0.0149119	0.0112593	SOCS3/SOCS1	2	T1
GO:0045064	T-helper 2 cell differentiation	2/62	14/17913	0.00104427	0.0169308	0.0127837	ANXA1/BATF	2	T1
GO:0061158	3'-UTR-mediated mRNA destabilization	2/62	15/17913	0.00120225	0.0183055	0.0138217	ZC3H12D/ZFP36L2	2	T1
GO:0030033	microvillus assembly	2/62	16/17913	0.00137094	0.0200043	0.0151044	FXYD5/EZR	2	T1
GO:0002902	regulation of B cell apoptotic process	2/62	17/17913	0.00155027	0.0217162	0.016397	IRS2/FOXP1	2	T1
GO:0048535	lymph node development	2/62	17/17913	0.00155027	0.0217162	0.016397	IL7R/LTB	2	T1
GO:0051023	regulation of immunoglobulin secretion	2/62	18/17913	0.00174017	0.0236205	0.0178348	TNFRSF4/CD40LG	2	T1
GO:0002313	mature B cell differentiation involved in immune response	2/62	19/17913	0.00194057	0.025742	0.0194367	GPR183/LGALS1	2	T1
GO:0051412	response to corticosterone	2/62	19/17913	0.00194057	0.025742	0.0194367	CDKN1A/FOS	2	T1
GO:0045655	regulation of monocyte differentiation	2/62	20/17913	0.0021514	0.0281127	0.0212267	CD4/FOXP1	2	T1
GO:0048305	immunoglobulin secretion	2/62	22/17913	0.00260403	0.033041	0.0249478	TNFRSF4/CD40LG	2	T1
GO:0001783	B cell apoptotic process	2/62	23/17913	0.00284569	0.0353519	0.0266927	IRS2/FOXP1	2	T1
GO:0050857	positive regulation of antigen receptor-mediated signaling pathway	2/62	23/17913	0.00284569	0.0353519	0.0266927	CCR7/FOXP1	2	T1
GO:0032528	microvillus organization	2/62	24/17913	0.00309749	0.0374049	0.0282428	FXYD5/EZR	2	T1
GO:0046639	negative regulation of alpha-beta T cell differentiation	2/62	24/17913	0.00309749	0.0374049	0.0282428	SOCS1/ANXA1	2	T1
GO:0002335	mature B cell differentiation	2/62	25/17913	0.00335936	0.038699	0.0292199	GPR183/LGALS1	2	T1
GO:0046426	negative regulation of JAK-STAT cascade	2/62	25/17913	0.00335936	0.038699	0.0292199	SOCS3/SOCS1	2	T1
GO:0060330	regulation of response to interferon-gamma	2/62	25/17913	0.00335936	0.038699	0.0292199	SOCS3/SOCS1	2	T1
GO:0060334	regulation of interferon-gamma-mediated signaling pathway	2/62	25/17913	0.00335936	0.038699	0.0292199	SOCS3/SOCS1	2	T1
GO:2000482	regulation of interleukin-8 secretion	2/62	25/17913	0.00335936	0.038699	0.0292199	CD2/ANXA1	2	T1
GO:0001773	myeloid dendritic cell activation	2/62	28/17913	0.00420466	0.0449027	0.0339041	CD2/BATF	2	T1
GO:0005979	regulation of glycogen biosynthetic process	2/62	28/17913	0.00420466	0.0449027	0.0339041	IRS2/PPP1CB	2	T1
GO:0010962	regulation of glucan biosynthetic process	2/62	28/17913	0.00420466	0.0449027	0.0339041	IRS2/PPP1CB	2	T1
GO:0061157	mRNA destabilization	2/62	28/17913	0.00420466	0.0449027	0.0339041	ZC3H12D/ZFP36L2	2	T1
GO:0071549	cellular response to dexamethasone stimulus	2/62	29/17913	0.0045061	0.0466874	0.0352517	DDIT4/NR3C1	2	T1
GO:0072606	interleukin-8 secretion	2/62	29/17913	0.0045061	0.0466874	0.0352517	CD2/ANXA1	2	T1
GO:0032743	positive regulation of interleukin-2 production	2/62	30/17913	0.00481725	0.048477	0.0366029	CD4/ANXA1	2	T1
GO:0043372	positive regulation of CD4-positive, alpha-beta T cell differentiation	2/62	30/17913	0.00481725	0.048477	0.0366029	SOCS1/ANXA1	2	T1
GO:0046596	regulation of viral entry into host cell	2/62	30/17913	0.00481725	0.048477	0.0366029	CD4/LGALS1	2	T1
GO:0050779	RNA destabilization	2/62	30/17913	0.00481725	0.048477	0.0366029	ZC3H12D/ZFP36L2	2	T1
GO:1902895	positive regulation of pri-miRNA transcription by RNA polymerase II	2/62	30/17913	0.00481725	0.048477	0.0366029	FOS/NR3C1	2	T1
GO:0051385	response to mineralocorticoid	2/62	31/17913	0.00513805	0.0508285	0.0383784	CDKN1A/FOS	2	T1
GO:1904893	negative regulation of STAT cascade	2/62	31/17913	0.00513805	0.0508285	0.0383784	SOCS3/SOCS1	2	T1
GO:0060674	placenta blood vessel development	2/62	32/17913	0.00546843	0.0531957	0.0401658	SOCS3/JUNB	2	T1
GO:0070873	regulation of glycogen metabolic process	2/62	33/17913	0.00580833	0.0561899	0.0424266	IRS2/PPP1CB	2	T1
GO:0010464	regulation of mesenchymal cell proliferation	2/62	34/17913	0.00615767	0.0582815	0.0440059	LMNA/IRS2	2	T1
GO:0018149	peptide cross-linking	2/62	34/17913	0.00615767	0.0582815	0.0440059	ANXA1/SPOCK2	2	T1
GO:0030224	monocyte differentiation	2/62	35/17913	0.00651639	0.0600536	0.0453439	CD4/FOXP1	2	T1
GO:0042092	type 2 immune response	2/62	35/17913	0.00651639	0.0600536	0.0453439	ANXA1/BATF	2	T1
GO:1903131	mononuclear cell differentiation	2/62	35/17913	0.00651639	0.0600536	0.0453439	CD4/FOXP1	2	T1
GO:0032885	regulation of polysaccharide biosynthetic process	2/62	36/17913	0.00688442	0.0621372	0.0469171	IRS2/PPP1CB	2	T1
GO:0046636	negative regulation of alpha-beta T cell activation	2/62	36/17913	0.00688442	0.0621372	0.0469171	SOCS1/ANXA1	2	T1
GO:2000516	positive regulation of CD4-positive, alpha-beta T cell activation	2/62	36/17913	0.00688442	0.0621372	0.0469171	SOCS1/ANXA1	2	T1
GO:0033280	response to vitamin D	2/62	38/17913	0.00764815	0.0676359	0.051069	CD4/AQP3	2	T1
GO:0050856	regulation of T cell receptor signaling pathway	2/62	38/17913	0.00764815	0.0676359	0.051069	CCR7/EZR	2	T1
GO:0071548	response to dexamethasone	2/62	39/17913	0.00804371	0.0697254	0.0526467	DDIT4/NR3C1	2	T1
GO:1902893	regulation of pri-miRNA transcription by RNA polymerase II	2/62	40/17913	0.00844832	0.072872	0.0550225	FOS/NR3C1	2	T1
GO:0032881	regulation of polysaccharide metabolic process	2/62	41/17913	0.00886192	0.0756938	0.0571531	IRS2/PPP1CB	2	T1
GO:0034198	cellular response to amino acid starvation	2/62	43/17913	0.00971579	0.0810112	0.0611681	CDKN1A/SESN3	2	T1
GO:0042771	intrinsic apoptotic signaling pathway in response to DNA damage by p53 class mediator	2/62	43/17913	0.00971579	0.0810112	0.0611681	CDKN1A/DDIT4	2	T1
GO:0097028	dendritic cell differentiation	2/62	43/17913	0.00971579	0.0810112	0.0611681	CCR7/BATF	2	T1
GO:0050706	regulation of interleukin-1 beta secretion	2/62	44/17913	0.0101559	0.0819496	0.0618766	CCR7/FOXP1	2	T1
GO:0061014	positive regulation of mRNA catabolic process	2/62	44/17913	0.0101559	0.0819496	0.0618766	ZC3H12D/ZFP36L2	2	T1
GO:0002820	negative regulation of adaptive immune response	2/62	45/17913	0.0106048	0.0821639	0.0620384	IL7R/SAMSN1	2	T1
GO:0005978	glycogen biosynthetic process	2/62	45/17913	0.0106048	0.0821639	0.0620384	IRS2/PPP1CB	2	T1
GO:0009250	glucan biosynthetic process	2/62	45/17913	0.0106048	0.0821639	0.0620384	IRS2/PPP1CB	2	T1
GO:0010463	mesenchymal cell proliferation	2/62	45/17913	0.0106048	0.0821639	0.0620384	LMNA/IRS2	2	T1
GO:0032007	negative regulation of TOR signaling	2/62	45/17913	0.0106048	0.0821639	0.0620384	DDIT4/SESN3	2	T1
GO:0045581	negative regulation of T cell differentiation	2/62	45/17913	0.0106048	0.0821639	0.0620384	SOCS1/ANXA1	2	T1
GO:0060711	labyrinthine layer development	2/62	46/17913	0.0110624	0.0842182	0.0635895	SOCS3/JUNB	2	T1
GO:0061614	pri-miRNA transcription by RNA polymerase II	2/62	46/17913	0.0110624	0.0842182	0.0635895	FOS/NR3C1	2	T1
GO:1990928	response to amino acid starvation	2/62	46/17913	0.0110624	0.0842182	0.0635895	CDKN1A/SESN3	2	T1
GO:0043370	regulation of CD4-positive, alpha-beta T cell differentiation	2/62	47/17913	0.0115285	0.0855355	0.0645842	SOCS1/ANXA1	2	T1
GO:0044764	multi-organism cellular process	2/62	47/17913	0.0115285	0.0855355	0.0645842	CD4/BIRC3	2	T1
GO:0046638	positive regulation of alpha-beta T cell differentiation	2/62	47/17913	0.0115285	0.0855355	0.0645842	SOCS1/ANXA1	2	T1
GO:0010712	regulation of collagen metabolic process	2/62	49/17913	0.0124863	0.090345	0.0682156	ITGB1/VIM	2	T1
GO:0060395	SMAD protein signal transduction	2/62	49/17913	0.0124863	0.090345	0.0682156	VIM/FOS	2	T1
GO:0001954	positive regulation of cell-matrix adhesion	2/62	51/17913	0.0134777	0.094398	0.0712759	CCR7/S100A10	2	T1
GO:0045620	negative regulation of lymphocyte differentiation	2/62	51/17913	0.0134777	0.094398	0.0712759	SOCS1/ANXA1	2	T1
GO:0050702	interleukin-1 beta secretion	2/62	51/17913	0.0134777	0.094398	0.0712759	CCR7/FOXP1	2	T1
GO:0070098	chemokine-mediated signaling pathway	2/62	51/17913	0.0134777	0.094398	0.0712759	CCR7/CCR6	2	T1
GO:0050704	regulation of interleukin-1 secretion	2/62	52/17913	0.0139859	0.0971798	0.0733763	CCR7/FOXP1	2	T1
GO:0006968	cellular defense response	2/62	53/17913	0.0145023	0.0999745	0.0754865	ITGB1/CCR6	2	T1
GO:0002763	positive regulation of myeloid leukocyte differentiation	2/62	54/17913	0.0150269	0.102381	0.0773039	CD4/FOS	2	T1
GO:1903078	positive regulation of protein localization to plasma membrane	2/62	54/17913	0.0150269	0.102381	0.0773039	ITGB1/EZR	2	T1
GO:0032507	maintenance of protein location in cell	2/62	57/17913	0.0166489	0.110009	0.0830628	CD4/EZR	2	T1
GO:1902041	regulation of extrinsic apoptotic signaling pathway via death domain receptors	2/62	57/17913	0.0166489	0.110009	0.0830628	MAL/TRADD	2	T1
GO:0046626	regulation of insulin receptor signaling pathway	2/62	58/17913	0.0172055	0.112003	0.0845688	SOCS1/SESN3	2	T1
GO:0046847	filopodium assembly	2/62	58/17913	0.0172055	0.112003	0.0845688	CCR7/EZR	2	T1
GO:0033692	cellular polysaccharide biosynthetic process	2/62	59/17913	0.01777	0.113559	0.0857438	IRS2/PPP1CB	2	T1
GO:0072678	T cell migration	2/62	59/17913	0.01777	0.113559	0.0857438	GPR183/CCR6	2	T1
GO:1903902	positive regulation of viral life cycle	2/62	59/17913	0.01777	0.113559	0.0857438	CD4/LGALS1	2	T1
GO:2000514	regulation of CD4-positive, alpha-beta T cell activation	2/62	59/17913	0.01777	0.113559	0.0857438	SOCS1/ANXA1	2	T1
GO:0050701	interleukin-1 secretion	2/62	60/17913	0.0183423	0.11553	0.0872317	CCR7/FOXP1	2	T1
GO:1990868	response to chemokine	2/62	60/17913	0.0183423	0.11553	0.0872317	CCR7/CCR6	2	T1
GO:1990869	cellular response to chemokine	2/62	60/17913	0.0183423	0.11553	0.0872317	CCR7/CCR6	2	T1
GO:0010803	regulation of tumor necrosis factor-mediated signaling pathway	2/62	61/17913	0.0189223	0.116256	0.0877799	TRADD/BIRC3	2	T1
GO:0034113	heterotypic cell-cell adhesion	2/62	61/17913	0.0189223	0.116256	0.0877799	ITGB1/CD2	2	T1
GO:0046635	positive regulation of alpha-beta T cell activation	2/62	61/17913	0.0189223	0.116256	0.0877799	SOCS1/ANXA1	2	T1
GO:1904377	positive regulation of protein localization to cell periphery	2/62	61/17913	0.0189223	0.116256	0.0877799	ITGB1/EZR	2	T1
GO:0002637	regulation of immunoglobulin production	2/62	62/17913	0.01951	0.118618	0.0895634	TNFRSF4/CD40LG	2	T1
GO:0070265	necrotic cell death	2/62	62/17913	0.01951	0.118618	0.0895634	TMEM123/BIRC3	2	T1
GO:0042108	positive regulation of cytokine biosynthetic process	2/62	63/17913	0.0201053	0.120563	0.091032	LTB/CD4	2	T1
GO:0046637	regulation of alpha-beta T cell differentiation	2/62	63/17913	0.0201053	0.120563	0.091032	SOCS1/ANXA1	2	T1
GO:0071277	cellular response to calcium ion	2/62	63/17913	0.0201053	0.120563	0.091032	JUNB/FOS	2	T1
GO:0000271	polysaccharide biosynthetic process	2/62	66/17913	0.0219365	0.128861	0.0972975	IRS2/PPP1CB	2	T1
GO:1900076	regulation of cellular response to insulin stimulus	2/62	66/17913	0.0219365	0.128861	0.0972975	SOCS1/SESN3	2	T1
GO:0005977	glycogen metabolic process	2/62	71/17913	0.0251356	0.141976	0.1072	IRS2/PPP1CB	2	T1
GO:0034637	cellular carbohydrate biosynthetic process	2/62	71/17913	0.0251356	0.141976	0.1072	IRS2/PPP1CB	2	T1
GO:1903313	positive regulation of mRNA metabolic process	2/62	71/17913	0.0251356	0.141976	0.1072	ZC3H12D/ZFP36L2	2	T1
GO:0006073	cellular glucan metabolic process	2/62	72/17913	0.025797	0.142517	0.107608	IRS2/PPP1CB	2	T1
GO:0032677	regulation of interleukin-8 production	2/62	72/17913	0.025797	0.142517	0.107608	CD2/ANXA1	2	T1
GO:0035019	somatic stem cell population maintenance	2/62	72/17913	0.025797	0.142517	0.107608	ZFP36L2/FOXP1	2	T1
GO:0044042	glucan metabolic process	2/62	72/17913	0.025797	0.142517	0.107608	IRS2/PPP1CB	2	T1
GO:0050710	negative regulation of cytokine secretion	2/62	72/17913	0.025797	0.142517	0.107608	ANXA1/EZR	2	T1
GO:0070373	negative regulation of ERK1 and ERK2 cascade	2/62	74/17913	0.0271409	0.148049	0.111786	EZR/DUSP4	2	T1
GO:0072332	intrinsic apoptotic signaling pathway by p53 class mediator	2/62	75/17913	0.0278233	0.149904	0.113186	CDKN1A/DDIT4	2	T1
GO:0008306	associative learning	2/62	77/17913	0.0292088	0.155349	0.117297	ITGB1/FOS	2	T1
GO:0042509	regulation of tyrosine phosphorylation of STAT protein	2/62	79/17913	0.0306214	0.160533	0.121212	SOCS3/SOCS1	2	T1
GO:0032637	interleukin-8 production	2/62	80/17913	0.0313377	0.162826	0.122943	CD2/ANXA1	2	T1
GO:0045682	regulation of epidermis development	2/62	81/17913	0.0320607	0.164628	0.124304	TRADD/AQP3	2	T1
GO:0007260	tyrosine phosphorylation of STAT protein	2/62	82/17913	0.0327902	0.164848	0.12447	SOCS3/SOCS1	2	T1
GO:0032651	regulation of interleukin-1 beta production	2/62	82/17913	0.0327902	0.164848	0.12447	CCR7/FOXP1	2	T1
GO:0006112	energy reserve metabolic process	2/62	83/17913	0.0335263	0.164848	0.12447	IRS2/PPP1CB	2	T1
GO:0008625	extrinsic apoptotic signaling pathway via death domain receptors	2/62	83/17913	0.0335263	0.164848	0.12447	MAL/TRADD	2	T1
GO:0001776	leukocyte homeostasis	2/62	84/17913	0.0342688	0.164848	0.12447	GPR183/ANXA1	2	T1
GO:0043470	regulation of carbohydrate catabolic process	2/62	84/17913	0.0342688	0.164848	0.12447	PPP1CB/DDIT4	2	T1
GO:0071621	granulocyte chemotaxis	2/62	84/17913	0.0342688	0.164848	0.12447	CCR7/ANXA1	2	T1
GO:0031532	actin cytoskeleton reorganization	2/62	85/17913	0.0350178	0.16635	0.125604	ANXA1/EZR	2	T1
GO:0045185	maintenance of protein location	2/62	85/17913	0.0350178	0.16635	0.125604	CD4/EZR	2	T1
GO:0046427	positive regulation of JAK-STAT cascade	2/62	85/17913	0.0350178	0.16635	0.125604	SOCS3/SOCS1	2	T1
GO:0048145	regulation of fibroblast proliferation	2/62	86/17913	0.0357731	0.16635	0.125604	FTH1/CDKN1A	2	T1
GO:0001892	embryonic placenta development	2/62	87/17913	0.0365348	0.16635	0.125604	SOCS3/JUNB	2	T1
GO:0048144	fibroblast proliferation	2/62	87/17913	0.0365348	0.16635	0.125604	FTH1/CDKN1A	2	T1
GO:0044264	cellular polysaccharide metabolic process	2/62	88/17913	0.0373027	0.16635	0.125604	IRS2/PPP1CB	2	T1
GO:0002824	positive regulation of adaptive immune response based on somatic recombination of immune receptors built from immunoglobulin superfamily domains	2/62	89/17913	0.0380768	0.167818	0.126712	CD4/ANXA1	2	T1
GO:0045639	positive regulation of myeloid cell differentiation	2/62	90/17913	0.038857	0.167818	0.126712	CD4/FOS	2	T1
GO:0046634	regulation of alpha-beta T cell activation	2/62	90/17913	0.038857	0.167818	0.126712	SOCS1/ANXA1	2	T1
GO:0060333	interferon-gamma-mediated signaling pathway	2/62	91/17913	0.0396434	0.167818	0.126712	SOCS3/SOCS1	2	T1
GO:1901655	cellular response to ketone	2/62	91/17913	0.0396434	0.167818	0.126712	DDIT4/NR3C1	2	T1
GO:0032611	interleukin-1 beta production	2/62	93/17913	0.0412343	0.167818	0.126712	CCR7/FOXP1	2	T1
GO:0032649	regulation of interferon-gamma production	2/62	93/17913	0.0412343	0.167818	0.126712	CCR7/CD2	2	T1
GO:0051591	response to cAMP	2/62	93/17913	0.0412343	0.167818	0.126712	EZR/FOS	2	T1
GO:1901216	positive regulation of neuron death	2/62	93/17913	0.0412343	0.167818	0.126712	FOS/DDIT4	2	T1
GO:1903076	regulation of protein localization to plasma membrane	2/62	93/17913	0.0412343	0.167818	0.126712	ITGB1/EZR	2	T1
GO:0002821	positive regulation of adaptive immune response	2/62	94/17913	0.0420387	0.167818	0.126712	CD4/ANXA1	2	T1
GO:0007229	integrin-mediated signaling pathway	2/62	94/17913	0.0420387	0.167818	0.126712	TIMP1/ITGB1	2	T1
GO:0043255	regulation of carbohydrate biosynthetic process	2/62	94/17913	0.0420387	0.167818	0.126712	IRS2/PPP1CB	2	T1
GO:0033273	response to vitamin	2/62	95/17913	0.0428491	0.167818	0.126712	CD4/AQP3	2	T1
GO:0097327	response to antineoplastic agent	2/62	96/17913	0.0436652	0.167818	0.126712	DDIT4/NR3C1	2	T1
GO:0032006	regulation of TOR signaling	2/62	98/17913	0.045315	0.171122	0.129207	DDIT4/SESN3	2	T1
GO:0005976	polysaccharide metabolic process	2/62	99/17913	0.0461485	0.171122	0.129207	IRS2/PPP1CB	2	T1
GO:1902106	negative regulation of leukocyte differentiation	2/62	99/17913	0.0461485	0.171122	0.129207	SOCS1/ANXA1	2	T1
GO:0097530	granulocyte migration	2/62	100/17913	0.0469877	0.171122	0.129207	CCR7/ANXA1	2	T1
GO:2001237	negative regulation of extrinsic apoptotic signaling pathway	2/62	100/17913	0.0469877	0.171122	0.129207	LMNA/TRADD	2	T1
GO:0002042	cell migration involved in sprouting angiogenesis	2/62	101/17913	0.0478324	0.172335	0.130122	ITGB1/ANXA1	2	T1
GO:0031623	receptor internalization	2/62	102/17913	0.0486828	0.173682	0.13114	ITGB1/EZR	2	T1
GO:0032963	collagen metabolic process	2/62	102/17913	0.0486828	0.173682	0.13114	ITGB1/VIM	2	T1
GO:0006606	protein import into nucleus	2/62	103/17913	0.0495387	0.173682	0.13114	LMNA/CDKN1A	2	T1
GO:0048524	positive regulation of viral process	2/62	103/17913	0.0495387	0.173682	0.13114	CD4/LGALS1	2	T1
GO:0050868	negative regulation of T cell activation	2/62	104/17913	0.0504	0.173682	0.13114	SOCS1/ANXA1	2	T1
GO:0032609	interferon-gamma production	2/62	105/17913	0.0512668	0.174646	0.131868	CCR7/CD2	2	T1
GO:0030330	DNA damage response, signal transduction by p53 class mediator	2/62	106/17913	0.052139	0.177272	0.133851	CDKN1A/BATF	2	T1
GO:1904659	glucose transmembrane transport	2/62	107/17913	0.0530165	0.177688	0.134164	IRS2/SLC2A3	2	T1
GO:0042035	regulation of cytokine biosynthetic process	2/62	110/17913	0.0556806	0.181596	0.137115	LTB/CD4	2	T1
GO:0008645	hexose transmembrane transport	2/62	112/17913	0.0574825	0.183671	0.138682	IRS2/SLC2A3	2	T1
GO:0010906	regulation of glucose metabolic process	2/62	113/17913	0.0583911	0.185291	0.139905	IRS2/PPP1CB	2	T1
GO:1904375	regulation of protein localization to cell periphery	2/62	113/17913	0.0583911	0.185291	0.139905	ITGB1/EZR	2	T1
GO:0015749	monosaccharide transmembrane transport	2/62	114/17913	0.0593047	0.186926	0.14114	IRS2/SLC2A3	2	T1
GO:0002698	negative regulation of immune effector process	2/62	116/17913	0.0611469	0.187394	0.141493	IL7R/ANXA1	2	T1
GO:0007569	cell aging	2/62	116/17913	0.0611469	0.187394	0.141493	LMNA/CDKN1A	2	T1
GO:0031929	TOR signaling	2/62	116/17913	0.0611469	0.187394	0.141493	DDIT4/SESN3	2	T1
GO:0034219	carbohydrate transmembrane transport	2/62	116/17913	0.0611469	0.187394	0.141493	IRS2/SLC2A3	2	T1
GO:0001952	regulation of cell-matrix adhesion	2/62	117/17913	0.0620753	0.187394	0.141493	CCR7/S100A10	2	T1
GO:0061025	membrane fusion	2/62	117/17913	0.0620753	0.187394	0.141493	CD4/ANXA1	2	T1
GO:0042089	cytokine biosynthetic process	2/62	120/17913	0.0648894	0.189685	0.143223	LTB/CD4	2	T1
GO:0046425	regulation of JAK-STAT cascade	2/62	120/17913	0.0648894	0.189685	0.143223	SOCS3/SOCS1	2	T1
GO:1905477	positive regulation of protein localization to membrane	2/62	120/17913	0.0648894	0.189685	0.143223	ITGB1/EZR	2	T1
GO:0042107	cytokine metabolic process	2/62	121/17913	0.065837	0.189914	0.143396	LTB/CD4	2	T1
GO:0055007	cardiac muscle cell differentiation	2/62	121/17913	0.065837	0.189914	0.143396	LMNA/ITGB1	2	T1
GO:1903038	negative regulation of leukocyte cell-cell adhesion	2/62	121/17913	0.065837	0.189914	0.143396	SOCS1/ANXA1	2	T1
GO:0042552	myelination	2/62	122/17913	0.0667892	0.189914	0.143396	MAL/SERINC5	2	T1
GO:0003158	endothelium development	2/62	124/17913	0.0687075	0.193109	0.145808	EZR/FOXP1	2	T1
GO:0008360	regulation of cell shape	2/62	124/17913	0.0687075	0.193109	0.145808	ANXA1/EZR	2	T1
GO:0046330	positive regulation of JNK cascade	2/62	124/17913	0.0687075	0.193109	0.145808	CCR7/CD40LG	2	T1
GO:0051170	import into nucleus	2/62	125/17913	0.0696735	0.193277	0.145936	LMNA/CDKN1A	2	T1
GO:0007272	ensheathment of neurons	2/62	126/17913	0.070644	0.193277	0.145936	MAL/SERINC5	2	T1
GO:0008366	axon ensheathment	2/62	126/17913	0.070644	0.193277	0.145936	MAL/SERINC5	2	T1
GO:0051668	localization within membrane	2/62	126/17913	0.070644	0.193277	0.145936	MAL/CD2	2	T1
GO:0010595	positive regulation of endothelial cell migration	2/62	129/17913	0.073582	0.195809	0.147847	ANXA1/FOXP1	2	T1
GO:0030518	intracellular steroid hormone receptor signaling pathway	2/62	129/17913	0.073582	0.195809	0.147847	FOXP1/NR3C1	2	T1
GO:0046683	response to organophosphorus	2/62	130/17913	0.0745701	0.197837	0.149378	EZR/FOS	2	T1
GO:0042770	signal transduction in response to DNA damage	2/62	131/17913	0.0755625	0.200166	0.151137	CDKN1A/BATF	2	T1
GO:0010977	negative regulation of neuron projection development	2/62	135/17913	0.0795743	0.204523	0.154426	VIM/LGALS1	2	T1
GO:0009267	cellular response to starvation	2/62	136/17913	0.0805876	0.205399	0.155088	CDKN1A/SESN3	2	T1
GO:0051017	actin filament bundle assembly	2/62	136/17913	0.0805876	0.205399	0.155088	S100A10/EZR	2	T1
GO:0071901	negative regulation of protein serine/threonine kinase activity	2/62	136/17913	0.0805876	0.205399	0.155088	CDKN1A/DUSP4	2	T1
GO:0061572	actin filament bundle organization	2/62	137/17913	0.081605	0.207528	0.156696	S100A10/EZR	2	T1
GO:0002700	regulation of production of molecular mediator of immune response	2/62	138/17913	0.0826264	0.207528	0.156696	TNFRSF4/CD40LG	2	T1
GO:0002831	regulation of response to biotic stimulus	2/62	139/17913	0.0836517	0.208356	0.157321	BIRC3/FOXP1	2	T1
GO:0007259	JAK-STAT cascade	2/62	140/17913	0.084681	0.209787	0.158401	SOCS3/SOCS1	2	T1
GO:0017038	protein import	2/62	140/17913	0.084681	0.209787	0.158401	LMNA/CDKN1A	2	T1
GO:0007612	learning	2/62	142/17913	0.0867513	0.210682	0.159077	ITGB1/FOS	2	T1
GO:0061041	regulation of wound healing	2/62	143/17913	0.0877922	0.21262	0.16054	CDKN1A/ANXA1	2	T1
GO:0045834	positive regulation of lipid metabolic process	2/62	144/17913	0.0888369	0.213045	0.160861	CCR7/IRS2	2	T1
GO:0014074	response to purine-containing compound	2/62	145/17913	0.0898854	0.213265	0.161027	EZR/FOS	2	T1
GO:0055002	striated muscle cell development	2/62	145/17913	0.0898854	0.213265	0.161027	LMNA/ITGB1	2	T1
GO:0060402	calcium ion transport into cytosol	2/62	145/17913	0.0898854	0.213265	0.161027	CD4/CCR7	2	T1
GO:0006090	pyruvate metabolic process	2/62	147/17913	0.0919934	0.216153	0.163208	LDHB/DDIT4	2	T1
GO:1903900	regulation of viral life cycle	2/62	147/17913	0.0919934	0.216153	0.163208	CD4/LGALS1	2	T1
GO:0035264	multicellular organism growth	2/62	149/17913	0.094116	0.218132	0.164702	ARID5B/EZR	2	T1
GO:0051092	positive regulation of NF-kappaB transcription factor activity	2/62	149/17913	0.094116	0.218132	0.164702	TRADD/CD40LG	2	T1
GO:0001890	placenta development	2/62	151/17913	0.0962528	0.220024	0.166131	SOCS3/JUNB	2	T1
GO:0032680	regulation of tumor necrosis factor production	2/62	151/17913	0.0962528	0.220024	0.166131	CD2/FOXP1	2	T1
GO:1903707	negative regulation of hemopoiesis	2/62	152/17913	0.0973265	0.222189	0.167765	SOCS1/ANXA1	2	T1
GO:0050729	positive regulation of inflammatory response	2/62	153/17913	0.0984037	0.22337	0.168657	CCR7/TRADD	2	T1
GO:0008361	regulation of cell size	2/62	154/17913	0.0994842	0.224192	0.169278	IL7R/TMEM123	2	T1
GO:0035051	cardiocyte differentiation	2/62	154/17913	0.0994842	0.224192	0.169278	LMNA/ITGB1	2	T1
GO:0032640	tumor necrosis factor production	2/62	155/17913	0.100568	0.224915	0.169824	CD2/FOXP1	2	T1
GO:0032874	positive regulation of stress-activated MAPK cascade	2/62	155/17913	0.100568	0.224915	0.169824	CCR7/CD40LG	2	T1
GO:1903555	regulation of tumor necrosis factor superfamily cytokine production	2/62	155/17913	0.100568	0.224915	0.169824	CD2/FOXP1	2	T1
GO:0070304	positive regulation of stress-activated protein kinase signaling cascade	2/62	156/17913	0.101655	0.224915	0.169824	CCR7/CD40LG	2	T1
GO:0060401	cytosolic calcium ion transport	2/62	157/17913	0.102746	0.226016	0.170655	CD4/CCR7	2	T1
GO:0019827	stem cell population maintenance	2/62	158/17913	0.10384	0.226923	0.17134	ZFP36L2/FOXP1	2	T1
GO:0055001	muscle cell development	2/62	159/17913	0.104937	0.226923	0.17134	LMNA/ITGB1	2	T1
GO:0048015	phosphatidylinositol-mediated signaling	2/62	160/17913	0.106038	0.228379	0.172439	IRS2/EZR	2	T1
GO:0098727	maintenance of cell number	2/62	160/17913	0.106038	0.228379	0.172439	ZFP36L2/FOXP1	2	T1
GO:0071706	tumor necrosis factor superfamily cytokine production	2/62	161/17913	0.107141	0.229936	0.173615	CD2/FOXP1	2	T1
GO:0031032	actomyosin structure organization	2/62	163/17913	0.109358	0.231542	0.174827	ITGB1/S100A10	2	T1
GO:0048017	inositol lipid-mediated signaling	2/62	163/17913	0.109358	0.231542	0.174827	IRS2/EZR	2	T1
GO:0071466	cellular response to xenobiotic stimulus	2/62	164/17913	0.11047	0.233334	0.17618	DDIT4/NR3C1	2	T1
GO:0031345	negative regulation of cell projection organization	2/62	166/17913	0.112705	0.236177	0.178327	VIM/LGALS1	2	T1
GO:0048469	cell maturation	2/62	167/17913	0.113827	0.236177	0.178327	CDKN1A/CCR6	2	T1
GO:0071248	cellular response to metal ion	2/62	167/17913	0.113827	0.236177	0.178327	JUNB/FOS	2	T1
GO:0046328	regulation of JNK cascade	2/62	169/17913	0.11608	0.238843	0.180341	CCR7/CD40LG	2	T1
GO:0050796	regulation of insulin secretion	2/62	169/17913	0.11608	0.238843	0.180341	IRS2/PIM3	2	T1
GO:0048771	tissue remodeling	2/62	170/17913	0.11721	0.239135	0.180561	TIMP1/ANXA1	2	T1
GO:0097529	myeloid leukocyte migration	2/62	170/17913	0.11721	0.239135	0.180561	CCR7/ANXA1	2	T1
GO:0007163	establishment or maintenance of cell polarity	2/62	172/17913	0.11948	0.242485	0.18309	CCR7/LMNA	2	T1
GO:0048660	regulation of smooth muscle cell proliferation	2/62	172/17913	0.11948	0.242485	0.18309	CDKN1A/FOXP1	2	T1
GO:1903034	regulation of response to wounding	2/62	173/17913	0.120619	0.242485	0.18309	CDKN1A/ANXA1	2	T1
GO:0042594	response to starvation	2/62	174/17913	0.121761	0.24422	0.1844	CDKN1A/SESN3	2	T1
GO:0048659	smooth muscle cell proliferation	2/62	174/17913	0.121761	0.24422	0.1844	CDKN1A/FOXP1	2	T1
GO:0043112	receptor metabolic process	2/62	177/17913	0.125203	0.247135	0.186601	ITGB1/EZR	2	T1
GO:0006367	transcription initiation from RNA polymerase II promoter	2/62	178/17913	0.126355	0.247135	0.186601	CDKN1A/NR3C1	2	T1
GO:0038061	NIK/NF-kappaB signaling	2/62	179/17913	0.12751	0.248354	0.187522	TRADD/BIRC3	2	T1
GO:0043409	negative regulation of MAPK cascade	2/62	179/17913	0.12751	0.248354	0.187522	EZR/DUSP4	2	T1
GO:0043902	positive regulation of multi-organism process	2/62	180/17913	0.128668	0.249776	0.188595	CD4/LGALS1	2	T1
GO:0002040	sprouting angiogenesis	2/62	181/17913	0.129828	0.250087	0.18883	ITGB1/ANXA1	2	T1
GO:0043401	steroid hormone mediated signaling pathway	2/62	181/17913	0.129828	0.250087	0.18883	FOXP1/NR3C1	2	T1
GO:1905475	regulation of protein localization to membrane	2/62	181/17913	0.129828	0.250087	0.18883	ITGB1/EZR	2	T1
GO:0043534	blood vessel endothelial cell migration	2/62	182/17913	0.130991	0.251773	0.190103	ITGB1/ANXA1	2	T1
GO:0050731	positive regulation of peptidyl-tyrosine phosphorylation	2/62	184/17913	0.133323	0.252925	0.190973	SOCS3/CD4	2	T1
GO:0016052	carbohydrate catabolic process	2/62	185/17913	0.134493	0.254592	0.192232	PPP1CB/DDIT4	2	T1
GO:1902905	positive regulation of supramolecular fiber organization	2/62	185/17913	0.134493	0.254592	0.192232	CCR7/S100A10	2	T1
GO:0050920	regulation of chemotaxis	2/62	186/17913	0.135666	0.25461	0.192245	GPR183/CCR7	2	T1
GO:0016051	carbohydrate biosynthetic process	2/62	194/17913	0.145127	0.265813	0.200704	IRS2/PPP1CB	2	T1
GO:0071241	cellular response to inorganic substance	2/62	194/17913	0.145127	0.265813	0.200704	JUNB/FOS	2	T1
GO:0000956	nuclear-transcribed mRNA catabolic process	2/62	197/17913	0.14871	0.270116	0.203953	ZFP36L2/RPLP0	2	T1
GO:0002699	positive regulation of immune effector process	2/62	198/17913	0.149909	0.27093	0.204567	TNFRSF4/ANXA1	2	T1
GO:0017148	negative regulation of translation	2/62	198/17913	0.149909	0.27093	0.204567	ZC3H12D/ZFP36L2	2	T1
GO:0090276	regulation of peptide hormone secretion	2/62	199/17913	0.151109	0.271656	0.205116	IRS2/PIM3	2	T1
GO:0007254	JNK cascade	2/62	200/17913	0.152312	0.273257	0.206324	CCR7/CD40LG	2	T1
GO:0030073	insulin secretion	2/62	200/17913	0.152312	0.273257	0.206324	IRS2/PIM3	2	T1
GO:0045665	negative regulation of neuron differentiation	2/62	201/17913	0.153517	0.273456	0.206475	VIM/LGALS1	2	T1
GO:0045766	positive regulation of angiogenesis	2/62	203/17913	0.155931	0.276967	0.209126	ITGB1/ANXA1	2	T1
GO:0006006	glucose metabolic process	2/62	204/17913	0.157142	0.277654	0.209645	IRS2/PPP1CB	2	T1
GO:0050792	regulation of viral process	2/62	204/17913	0.157142	0.277654	0.209645	CD4/LGALS1	2	T1
GO:0051495	positive regulation of cytoskeleton organization	2/62	205/17913	0.158354	0.279232	0.210836	CCR7/S100A10	2	T1
GO:0007411	axon guidance	2/62	210/17913	0.164441	0.284241	0.214618	IRS2/EZR	2	T1
GO:0010951	negative regulation of endopeptidase activity	2/62	210/17913	0.164441	0.284241	0.214618	TIMP1/SPOCK2	2	T1
GO:0071456	cellular response to hypoxia	2/62	210/17913	0.164441	0.284241	0.214618	LMNA/AQP3	2	T1
GO:0097485	neuron projection guidance	2/62	212/17913	0.166888	0.287053	0.216742	IRS2/EZR	2	T1
GO:0007584	response to nutrient	2/62	215/17913	0.17057	0.290941	0.219677	CD4/AQP3	2	T1
GO:0046578	regulation of Ras protein signal transduction	2/62	215/17913	0.17057	0.290941	0.219677	ITGB1/IRS2	2	T1
GO:0009755	hormone-mediated signaling pathway	2/62	216/17913	0.1718	0.292061	0.220523	FOXP1/NR3C1	2	T1
GO:0034249	negative regulation of cellular amide metabolic process	2/62	217/17913	0.173033	0.293556	0.221652	ZC3H12D/ZFP36L2	2	T1
GO:0009266	response to temperature stimulus	2/62	219/17913	0.175501	0.296053	0.223537	CDKN1A/FOS	2	T1
GO:0036294	cellular response to decreased oxygen levels	2/62	220/17913	0.176738	0.29671	0.224033	LMNA/AQP3	2	T1
GO:2000116	regulation of cysteine-type endopeptidase activity	2/62	222/17913	0.179215	0.299187	0.225903	TRADD/BIRC3	2	T1
GO:0010466	negative regulation of peptidase activity	2/62	223/17913	0.180456	0.300075	0.226574	TIMP1/SPOCK2	2	T1
GO:0034504	protein localization to nucleus	2/62	223/17913	0.180456	0.300075	0.226574	LMNA/CDKN1A	2	T1
GO:0110053	regulation of actin filament organization	2/62	228/17913	0.18668	0.306351	0.231313	CCR7/S100A10	2	T1
GO:0006352	DNA-templated transcription, initiation	2/62	231/17913	0.19043	0.308106	0.232638	CDKN1A/NR3C1	2	T1
GO:0010594	regulation of endothelial cell migration	2/62	231/17913	0.19043	0.308106	0.232638	ANXA1/FOXP1	2	T1
GO:0043903	regulation of symbiosis, encompassing mutualism through parasitism	2/62	232/17913	0.191682	0.308772	0.23314	CD4/LGALS1	2	T1
GO:1904018	positive regulation of vasculature development	2/62	232/17913	0.191682	0.308772	0.23314	ITGB1/ANXA1	2	T1
GO:0098742	cell-cell adhesion via plasma-membrane adhesion molecules	2/62	233/17913	0.192935	0.310505	0.234449	ITGB1/FXYD5	2	T1
GO:1901991	negative regulation of mitotic cell cycle phase transition	2/62	235/17913	0.195445	0.313106	0.236413	CDKN1A/ZFP36L2	2	T1
GO:0048863	stem cell differentiation	2/62	237/17913	0.19796	0.313854	0.236978	ZFP36L2/BATF	2	T1
GO:0071453	cellular response to oxygen levels	2/62	237/17913	0.19796	0.313854	0.236978	LMNA/AQP3	2	T1
GO:0000086	G2/M transition of mitotic cell cycle	2/62	238/17913	0.199219	0.313854	0.236978	CDKN1A/PPP1CB	2	T1
GO:0045165	cell fate commitment	2/62	238/17913	0.199219	0.313854	0.236978	ITGB1/BATF	2	T1
GO:0019318	hexose metabolic process	2/62	239/17913	0.200479	0.315398	0.238143	IRS2/PPP1CB	2	T1
GO:0030072	peptide hormone secretion	2/62	241/17913	0.203001	0.318508	0.240492	IRS2/PIM3	2	T1
GO:0033002	muscle cell proliferation	2/62	243/17913	0.205528	0.320661	0.242118	CDKN1A/FOXP1	2	T1
GO:0061448	connective tissue development	2/62	243/17913	0.205528	0.320661	0.242118	TIMP1/ARID5B	2	T1
GO:0031330	negative regulation of cellular catabolic process	2/62	244/17913	0.206792	0.321575	0.242807	TIMP1/DDIT4	2	T1
GO:0051924	regulation of calcium ion transport	2/62	244/17913	0.206792	0.321575	0.242807	CD4/AHNAK	2	T1
GO:0042742	defense response to bacterium	2/62	245/17913	0.208058	0.322112	0.243213	CD4/FOXP1	2	T1
GO:0007611	learning or memory	2/62	247/17913	0.210591	0.324029	0.244661	ITGB1/FOS	2	T1
GO:0018209	peptidyl-serine modification	2/62	252/17913	0.216939	0.33167	0.25043	SPOCK2/DDIT4	2	T1
GO:1901988	negative regulation of cell cycle phase transition	2/62	254/17913	0.219484	0.332741	0.251239	CDKN1A/ZFP36L2	2	T1
GO:0044839	cell cycle G2/M phase transition	2/62	257/17913	0.223306	0.336687	0.254218	CDKN1A/PPP1CB	2	T1
GO:0021700	developmental maturation	2/62	262/17913	0.229688	0.342284	0.258444	CDKN1A/CCR6	2	T1
GO:0051146	striated muscle cell differentiation	2/62	263/17913	0.230966	0.343312	0.25922	LMNA/ITGB1	2	T1
GO:0090305	nucleic acid phosphodiester bond hydrolysis	2/62	268/17913	0.237364	0.348149	0.262873	ZC3H12D/RNASET2	2	T1
GO:0000082	G1/S transition of mitotic cell cycle	2/62	269/17913	0.238645	0.349387	0.263807	ITGB1/CDKN1A	2	T1
GO:0072593	reactive oxygen species metabolic process	2/62	269/17913	0.238645	0.349387	0.263807	CDKN1A/DDIT4	2	T1
GO:0009410	response to xenobiotic stimulus	2/62	270/17913	0.239926	0.349694	0.264039	DDIT4/NR3C1	2	T1
GO:0050768	negative regulation of neurogenesis	2/62	271/17913	0.241208	0.351085	0.265089	VIM/LGALS1	2	T1
GO:0031647	regulation of protein stability	2/62	272/17913	0.24249	0.352658	0.266277	LMNA/CDKN1A	2	T1
GO:0043414	macromolecule methylation	2/62	276/17913	0.247622	0.357336	0.269809	LMNA/FOS	2	T1
GO:0016050	vesicle organization	2/62	280/17913	0.252758	0.361586	0.273018	S100A10/ANXA1	2	T1
GO:0042063	gliogenesis	2/62	285/17913	0.259183	0.367771	0.277688	GPR183/VIM	2	T1
GO:0050890	cognition	2/62	286/17913	0.260469	0.367875	0.277767	ITGB1/FOS	2	T1
GO:0046034	ATP metabolic process	2/62	287/17913	0.261754	0.368434	0.278189	DDIT4/NDUFV2	2	T1
GO:0090150	establishment of protein localization to membrane	2/62	287/17913	0.261754	0.368434	0.278189	MAL/RPLP0	2	T1
GO:0009895	negative regulation of catabolic process	2/62	288/17913	0.26304	0.368532	0.278263	TIMP1/DDIT4	2	T1
GO:0044843	cell cycle G1/S phase transition	2/62	288/17913	0.26304	0.368532	0.278263	ITGB1/CDKN1A	2	T1
GO:0001818	negative regulation of cytokine production	2/62	290/17913	0.265612	0.370882	0.280037	ANXA1/EZR	2	T1
GO:0051961	negative regulation of nervous system development	2/62	290/17913	0.265612	0.370882	0.280037	VIM/LGALS1	2	T1
GO:0070588	calcium ion transmembrane transport	2/62	293/17913	0.26947	0.373292	0.281857	CCR7/AHNAK	2	T1
GO:0032956	regulation of actin cytoskeleton organization	2/62	297/17913	0.274614	0.378919	0.286106	CCR7/S100A10	2	T1
GO:0030216	keratinocyte differentiation	2/62	298/17913	0.2759	0.37995	0.286884	AQP3/ANXA1	2	T1
GO:0006898	receptor-mediated endocytosis	2/62	301/17913	0.279757	0.3824	0.288734	ITGB1/EZR	2	T1
GO:0006913	nucleocytoplasmic transport	2/62	302/17913	0.281043	0.382955	0.289153	LMNA/CDKN1A	2	T1
GO:0032147	activation of protein kinase activity	2/62	303/17913	0.282328	0.384115	0.290029	CD40LG/SOCS1	2	T1
GO:0051169	nuclear transport	2/62	305/17913	0.284898	0.386711	0.291989	LMNA/CDKN1A	2	T1
GO:0006909	phagocytosis	2/62	308/17913	0.288753	0.388928	0.293663	ITGB1/ANXA1	2	T1
GO:0045930	negative regulation of mitotic cell cycle	2/62	308/17913	0.288753	0.388928	0.293663	CDKN1A/ZFP36L2	2	T1
GO:1901214	regulation of neuron death	2/62	313/17913	0.295173	0.395825	0.298871	FOS/DDIT4	2	T1
GO:1902903	regulation of supramolecular fiber organization	2/62	313/17913	0.295173	0.395825	0.298871	CCR7/S100A10	2	T1
GO:0009205	purine ribonucleoside triphosphate metabolic process	2/62	314/17913	0.296456	0.395953	0.298967	DDIT4/NDUFV2	2	T1
GO:0032103	positive regulation of response to external stimulus	2/62	315/17913	0.297739	0.397363	0.300032	CCR7/TRADD	2	T1
GO:0051056	regulation of small GTPase mediated signal transduction	2/62	316/17913	0.299021	0.398467	0.300866	ITGB1/IRS2	2	T1
GO:0009167	purine ribonucleoside monophosphate metabolic process	2/62	317/17913	0.300303	0.399568	0.301697	DDIT4/NDUFV2	2	T1
GO:0010721	negative regulation of cell development	2/62	317/17913	0.300303	0.399568	0.301697	VIM/LGALS1	2	T1
GO:0009126	purine nucleoside monophosphate metabolic process	2/62	318/17913	0.301585	0.400057	0.302066	DDIT4/NDUFV2	2	T1
GO:1903829	positive regulation of cellular protein localization	2/62	318/17913	0.301585	0.400057	0.302066	ITGB1/EZR	2	T1
GO:0009199	ribonucleoside triphosphate metabolic process	2/62	319/17913	0.302867	0.401453	0.30312	DDIT4/NDUFV2	2	T1
GO:0009144	purine nucleoside triphosphate metabolic process	2/62	321/17913	0.305429	0.404229	0.305216	DDIT4/NDUFV2	2	T1
GO:0043405	regulation of MAP kinase activity	2/62	322/17913	0.306709	0.404977	0.305781	CD40LG/DUSP4	2	T1
GO:0007178	transmembrane receptor protein serine/threonine kinase signaling pathway	2/62	323/17913	0.30799	0.404977	0.305781	VIM/FOS	2	T1
GO:0045861	negative regulation of proteolysis	2/62	324/17913	0.309269	0.405945	0.306512	TIMP1/SPOCK2	2	T1
GO:0048638	regulation of developmental growth	2/62	325/17913	0.310549	0.407224	0.307478	CDKN1A/EZR	2	T1
GO:0022412	cellular process involved in reproduction in multicellular organism	2/62	326/17913	0.311827	0.408384	0.308353	ITGB1/CCR6	2	T1
GO:0009161	ribonucleoside monophosphate metabolic process	2/62	331/17913	0.318215	0.412736	0.311639	DDIT4/NDUFV2	2	T1
GO:0032259	methylation	2/62	336/17913	0.324589	0.416583	0.314544	LMNA/FOS	2	T1
GO:0009141	nucleoside triphosphate metabolic process	2/62	337/17913	0.325863	0.417154	0.314975	DDIT4/NDUFV2	2	T1
GO:0032970	regulation of actin filament-based process	2/62	341/17913	0.33095	0.420533	0.317526	CCR7/S100A10	2	T1
GO:0032102	negative regulation of response to external stimulus	2/62	343/17913	0.33349	0.422087	0.3187	SOCS3/CDKN1A	2	T1
GO:0010948	negative regulation of cell cycle process	2/62	344/17913	0.33476	0.422308	0.318867	CDKN1A/ZFP36L2	2	T1
GO:0009913	epidermal cell differentiation	2/62	346/17913	0.337296	0.424285	0.32036	AQP3/ANXA1	2	T1
GO:0070997	neuron death	2/62	347/17913	0.338563	0.425174	0.321031	FOS/DDIT4	2	T1
GO:0009123	nucleoside monophosphate metabolic process	2/62	349/17913	0.341095	0.42745	0.32275	DDIT4/NDUFV2	2	T1
GO:0042176	regulation of protein catabolic process	2/62	354/17913	0.347413	0.432661	0.326683	TIMP1/EZR	2	T1
GO:0042692	muscle cell differentiation	2/62	359/17913	0.353713	0.438592	0.331162	LMNA/ITGB1	2	T1
GO:0010959	regulation of metal ion transport	2/62	365/17913	0.361246	0.443146	0.334601	CD4/AHNAK	2	T1
GO:0006732	coenzyme metabolic process	2/62	366/17913	0.362498	0.443699	0.335018	SLC2A3/DDIT4	2	T1
GO:0009100	glycoprotein metabolic process	2/62	369/17913	0.366251	0.445041	0.336032	CCR7/SPOCK2	2	T1
GO:0045765	regulation of angiogenesis	2/62	383/17913	0.383652	0.456059	0.344351	ITGB1/ANXA1	2	T1
GO:0007517	muscle organ development	2/62	403/17913	0.408165	0.475197	0.358801	ARID5B/FOS	2	T1
GO:0048568	embryonic organ development	2/62	413/17913	0.420252	0.486038	0.366986	SOCS3/JUNB	2	T1
GO:0051346	negative regulation of hydrolase activity	2/62	420/17913	0.428641	0.491846	0.371372	TIMP1/SPOCK2	2	T1
GO:0048732	gland development	2/62	422/17913	0.431026	0.493608	0.372703	ARID5B/IRS2	2	T1
GO:1901342	regulation of vasculature development	2/62	425/17913	0.434595	0.497045	0.375298	ITGB1/ANXA1	2	T1
GO:0046394	carboxylic acid biosynthetic process	2/62	426/17913	0.435782	0.497753	0.375832	SERINC5/DDIT4	2	T1
GO:0016053	organic acid biosynthetic process	2/62	427/17913	0.436968	0.498004	0.376021	SERINC5/DDIT4	2	T1
GO:1901990	regulation of mitotic cell cycle phase transition	2/62	428/17913	0.438153	0.498833	0.376648	CDKN1A/ZFP36L2	2	T1
GO:0003012	muscle system process	2/62	448/17913	0.461563	0.513827	0.387969	LMNA/VIM	2	T1
GO:0051656	establishment of organelle localization	2/62	448/17913	0.461563	0.513827	0.387969	AP3M2/EZR	2	T1
GO:0034765	regulation of ion transmembrane transport	2/62	453/17913	0.46733	0.517448	0.390703	IRS2/AHNAK	2	T1
GO:0010975	regulation of neuron projection development	2/62	458/17913	0.473061	0.520969	0.393362	VIM/LGALS1	2	T1
GO:0000226	microtubule cytoskeleton organization	2/62	460/17913	0.475344	0.522162	0.394263	LMNA/EZR	2	T1
GO:1901987	regulation of cell cycle phase transition	2/62	464/17913	0.479891	0.526497	0.397536	CDKN1A/ZFP36L2	2	T1
GO:0007005	mitochondrion organization	2/62	466/17913	0.482157	0.527717	0.398457	LMNA/NDUFV2	2	T1
GO:0016049	cell growth	2/62	466/17913	0.482157	0.527717	0.398457	ITGB1/CDKN1A	2	T1
GO:0051493	regulation of cytoskeleton organization	2/62	472/17913	0.488916	0.532065	0.40174	CCR7/S100A10	2	T1
GO:0060627	regulation of vesicle-mediated transport	2/62	480/17913	0.497846	0.538769	0.406802	ANXA1/EZR	2	T1
GO:0022411	cellular component disassembly	2/62	492/17913	0.511059	0.549671	0.415033	TIMP1/DDIT4	2	T1
GO:0009636	response to toxic substance	2/62	499/17913	0.518664	0.556484	0.420177	CDKN1A/FOS	2	T1
GO:0050878	regulation of body fluid levels	2/62	499/17913	0.518664	0.556484	0.420177	AQP3/CD40LG	2	T1
GO:0009150	purine ribonucleotide metabolic process	2/62	500/17913	0.519744	0.557301	0.420794	DDIT4/NDUFV2	2	T1
GO:0001768	establishment of T cell polarity	1/62	10/17913	0.034086	0.164848	0.12447	CCR7	1	T1
GO:0003376	sphingosine-1-phosphate receptor signaling pathway	1/62	10/17913	0.034086	0.164848	0.12447	EZR	1	T1
GO:0006563	L-serine metabolic process	1/62	10/17913	0.034086	0.164848	0.12447	SERINC5	1	T1
GO:0007016	cytoskeletal anchoring at plasma membrane	1/62	10/17913	0.034086	0.164848	0.12447	EZR	1	T1
GO:0007084	mitotic nuclear envelope reassembly	1/62	10/17913	0.034086	0.164848	0.12447	LMNA	1	T1
GO:0032000	positive regulation of fatty acid beta-oxidation	1/62	10/17913	0.034086	0.164848	0.12447	IRS2	1	T1
GO:0043471	regulation of cellular carbohydrate catabolic process	1/62	10/17913	0.034086	0.164848	0.12447	PPP1CB	1	T1
GO:0044803	multi-organism membrane organization	1/62	10/17913	0.034086	0.164848	0.12447	CD4	1	T1
GO:0045060	negative thymic T cell selection	1/62	10/17913	0.034086	0.164848	0.12447	CCR7	1	T1
GO:0045625	regulation of T-helper 1 cell differentiation	1/62	10/17913	0.034086	0.164848	0.12447	ANXA1	1	T1
GO:0045657	positive regulation of monocyte differentiation	1/62	10/17913	0.034086	0.164848	0.12447	CD4	1	T1
GO:0061179	negative regulation of insulin secretion involved in cellular response to glucose stimulus	1/62	10/17913	0.034086	0.164848	0.12447	PIM3	1	T1
GO:0072697	protein localization to cell cortex	1/62	10/17913	0.034086	0.164848	0.12447	EZR	1	T1
GO:0001767	establishment of lymphocyte polarity	1/62	11/17913	0.0374311	0.16635	0.125604	CCR7	1	T1
GO:0002604	regulation of dendritic cell antigen processing and presentation	1/62	11/17913	0.0374311	0.16635	0.125604	CCR7	1	T1
GO:0009629	response to gravity	1/62	11/17913	0.0374311	0.16635	0.125604	FOS	1	T1
GO:0015791	polyol transport	1/62	11/17913	0.0374311	0.16635	0.125604	AQP3	1	T1
GO:0019755	one-carbon compound transport	1/62	11/17913	0.0374311	0.16635	0.125604	AQP3	1	T1
GO:0031274	positive regulation of pseudopodium assembly	1/62	11/17913	0.0374311	0.16635	0.125604	CCR7	1	T1
GO:0032060	bleb assembly	1/62	11/17913	0.0374311	0.16635	0.125604	EMP3	1	T1
GO:0033089	positive regulation of T cell differentiation in thymus	1/62	11/17913	0.0374311	0.16635	0.125604	IL7R	1	T1
GO:0043383	negative T cell selection	1/62	11/17913	0.0374311	0.16635	0.125604	CCR7	1	T1
GO:0045176	apical protein localization	1/62	11/17913	0.0374311	0.16635	0.125604	MAL	1	T1
GO:0045628	regulation of T-helper 2 cell differentiation	1/62	11/17913	0.0374311	0.16635	0.125604	ANXA1	1	T1
GO:0045793	positive regulation of cell size	1/62	11/17913	0.0374311	0.16635	0.125604	TMEM123	1	T1
GO:0051024	positive regulation of immunoglobulin secretion	1/62	11/17913	0.0374311	0.16635	0.125604	TNFRSF4	1	T1
GO:0051574	positive regulation of histone H3-K9 methylation	1/62	11/17913	0.0374311	0.16635	0.125604	LMNA	1	T1
GO:0055015	ventricular cardiac muscle cell development	1/62	11/17913	0.0374311	0.16635	0.125604	LMNA	1	T1
GO:0097048	dendritic cell apoptotic process	1/62	11/17913	0.0374311	0.16635	0.125604	CCR7	1	T1
GO:1900112	regulation of histone H3-K9 trimethylation	1/62	11/17913	0.0374311	0.16635	0.125604	LMNA	1	T1
GO:1902093	positive regulation of flagellated sperm motility	1/62	11/17913	0.0374311	0.16635	0.125604	CCR6	1	T1
GO:1905668	positive regulation of protein localization to endosome	1/62	11/17913	0.0374311	0.16635	0.125604	EZR	1	T1
GO:2000668	regulation of dendritic cell apoptotic process	1/62	11/17913	0.0374311	0.16635	0.125604	CCR7	1	T1
GO:0001765	membrane raft assembly	1/62	12/17913	0.0407648	0.167818	0.126712	S100A10	1	T1
GO:0002468	dendritic cell antigen processing and presentation	1/62	12/17913	0.0407648	0.167818	0.126712	CCR7	1	T1
GO:0002517	T cell tolerance induction	1/62	12/17913	0.0407648	0.167818	0.126712	ICOS	1	T1
GO:0002863	positive regulation of inflammatory response to antigenic stimulus	1/62	12/17913	0.0407648	0.167818	0.126712	CCR7	1	T1
GO:0031272	regulation of pseudopodium assembly	1/62	12/17913	0.0407648	0.167818	0.126712	CCR7	1	T1
GO:0042118	endothelial cell activation	1/62	12/17913	0.0407648	0.167818	0.126712	FOXP1	1	T1
GO:0051238	sequestering of metal ion	1/62	12/17913	0.0407648	0.167818	0.126712	FTH1	1	T1
GO:0051798	positive regulation of hair follicle development	1/62	12/17913	0.0407648	0.167818	0.126712	TRADD	1	T1
GO:0060670	branching involved in labyrinthine layer morphogenesis	1/62	12/17913	0.0407648	0.167818	0.126712	SOCS3	1	T1
GO:0060707	trophoblast giant cell differentiation	1/62	12/17913	0.0407648	0.167818	0.126712	SOCS3	1	T1
GO:0061450	trophoblast cell migration	1/62	12/17913	0.0407648	0.167818	0.126712	TIMP1	1	T1
GO:0070307	lens fiber cell development	1/62	12/17913	0.0407648	0.167818	0.126712	VIM	1	T1
GO:0072540	T-helper 17 cell lineage commitment	1/62	12/17913	0.0407648	0.167818	0.126712	BATF	1	T1
GO:0090520	sphingolipid mediated signaling pathway	1/62	12/17913	0.0407648	0.167818	0.126712	EZR	1	T1
GO:1901163	regulation of trophoblast cell migration	1/62	12/17913	0.0407648	0.167818	0.126712	TIMP1	1	T1
GO:1905666	regulation of protein localization to endosome	1/62	12/17913	0.0407648	0.167818	0.126712	EZR	1	T1
GO:0002829	negative regulation of type 2 immune response	1/62	13/17913	0.0440871	0.167818	0.126712	ANXA1	1	T1
GO:0002864	regulation of acute inflammatory response to antigenic stimulus	1/62	13/17913	0.0440871	0.167818	0.126712	CCR7	1	T1
GO:0014745	negative regulation of muscle adaptation	1/62	13/17913	0.0440871	0.167818	0.126712	LMNA	1	T1
GO:0021535	cell migration in hindbrain	1/62	13/17913	0.0440871	0.167818	0.126712	ITGB1	1	T1
GO:0032530	regulation of microvillus organization	1/62	13/17913	0.0440871	0.167818	0.126712	EZR	1	T1
GO:0032536	regulation of cell projection size	1/62	13/17913	0.0440871	0.167818	0.126712	EZR	1	T1
GO:0035723	interleukin-15-mediated signaling pathway	1/62	13/17913	0.0440871	0.167818	0.126712	CD4	1	T1
GO:0042635	positive regulation of hair cycle	1/62	13/17913	0.0440871	0.167818	0.126712	TRADD	1	T1
GO:0043374	CD8-positive, alpha-beta T cell differentiation	1/62	13/17913	0.0440871	0.167818	0.126712	SOCS1	1	T1
GO:0045086	positive regulation of interleukin-2 biosynthetic process	1/62	13/17913	0.0440871	0.167818	0.126712	CD4	1	T1
GO:0045820	negative regulation of glycolytic process	1/62	13/17913	0.0440871	0.167818	0.126712	DDIT4	1	T1
GO:0060576	intestinal epithelial cell development	1/62	13/17913	0.0440871	0.167818	0.126712	CDKN1A	1	T1
GO:0060712	spongiotrophoblast layer development	1/62	13/17913	0.0440871	0.167818	0.126712	SOCS3	1	T1
GO:0071350	cellular response to interleukin-15	1/62	13/17913	0.0440871	0.167818	0.126712	CD4	1	T1
GO:0071850	mitotic cell cycle arrest	1/62	13/17913	0.0440871	0.167818	0.126712	CDKN1A	1	T1
GO:0090594	inflammatory response to wounding	1/62	13/17913	0.0440871	0.167818	0.126712	TIMP1	1	T1
GO:1902713	regulation of interferon-gamma secretion	1/62	13/17913	0.0440871	0.167818	0.126712	CD2	1	T1
GO:1903651	positive regulation of cytoplasmic transport	1/62	13/17913	0.0440871	0.167818	0.126712	EZR	1	T1
GO:1903960	negative regulation of anion transmembrane transport	1/62	13/17913	0.0440871	0.167818	0.126712	IRS2	1	T1
GO:2001044	regulation of integrin-mediated signaling pathway	1/62	13/17913	0.0440871	0.167818	0.126712	TIMP1	1	T1
GO:0001771	immunological synapse formation	1/62	14/17913	0.047398	0.171122	0.129207	CCR7	1	T1
GO:0002523	leukocyte migration involved in inflammatory response	1/62	14/17913	0.047398	0.171122	0.129207	CCR6	1	T1
GO:0031269	pseudopodium assembly	1/62	14/17913	0.047398	0.171122	0.129207	CCR7	1	T1
GO:0042976	activation of Janus kinase activity	1/62	14/17913	0.047398	0.171122	0.129207	SOCS1	1	T1
GO:0045591	positive regulation of regulatory T cell differentiation	1/62	14/17913	0.047398	0.171122	0.129207	SOCS1	1	T1
GO:0050862	positive regulation of T cell receptor signaling pathway	1/62	14/17913	0.047398	0.171122	0.129207	CCR7	1	T1
GO:0070672	response to interleukin-15	1/62	14/17913	0.047398	0.171122	0.129207	CD4	1	T1
GO:0072567	chemokine (C-X-C motif) ligand 2 production	1/62	14/17913	0.047398	0.171122	0.129207	FOXP1	1	T1
GO:0090399	replicative senescence	1/62	14/17913	0.047398	0.171122	0.129207	CDKN1A	1	T1
GO:1902043	positive regulation of extrinsic apoptotic signaling pathway via death domain receptors	1/62	14/17913	0.047398	0.171122	0.129207	MAL	1	T1
GO:1905049	negative regulation of metallopeptidase activity	1/62	14/17913	0.047398	0.171122	0.129207	TIMP1	1	T1
GO:0001829	trophectodermal cell differentiation	1/62	15/17913	0.0506977	0.173682	0.13114	JUNB	1	T1
GO:0009070	serine family amino acid biosynthetic process	1/62	15/17913	0.0506977	0.173682	0.13114	SERINC5	1	T1
GO:0030812	negative regulation of nucleotide catabolic process	1/62	15/17913	0.0506977	0.173682	0.13114	DDIT4	1	T1
GO:0031268	pseudopodium organization	1/62	15/17913	0.0506977	0.173682	0.13114	CCR7	1	T1
GO:0031468	nuclear envelope reassembly	1/62	15/17913	0.0506977	0.173682	0.13114	LMNA	1	T1
GO:0042921	glucocorticoid receptor signaling pathway	1/62	15/17913	0.0506977	0.173682	0.13114	NR3C1	1	T1
GO:0046321	positive regulation of fatty acid oxidation	1/62	15/17913	0.0506977	0.173682	0.13114	IRS2	1	T1
GO:0051198	negative regulation of coenzyme metabolic process	1/62	15/17913	0.0506977	0.173682	0.13114	DDIT4	1	T1
GO:0060766	negative regulation of androgen receptor signaling pathway	1/62	15/17913	0.0506977	0.173682	0.13114	FOXP1	1	T1
GO:1902001	fatty acid transmembrane transport	1/62	15/17913	0.0506977	0.173682	0.13114	IRS2	1	T1
GO:1904262	negative regulation of TORC1 signaling	1/62	15/17913	0.0506977	0.173682	0.13114	SESN3	1	T1
GO:2000484	positive regulation of interleukin-8 secretion	1/62	15/17913	0.0506977	0.173682	0.13114	CD2	1	T1
GO:2001185	regulation of CD8-positive, alpha-beta T cell activation	1/62	15/17913	0.0506977	0.173682	0.13114	SOCS1	1	T1
GO:0001780	neutrophil homeostasis	1/62	16/17913	0.0539862	0.177688	0.134164	ANXA1	1	T1
GO:0002070	epithelial cell maturation	1/62	16/17913	0.0539862	0.177688	0.134164	CDKN1A	1	T1
GO:0002295	T-helper cell lineage commitment	1/62	16/17913	0.0539862	0.177688	0.134164	BATF	1	T1
GO:0031958	corticosteroid receptor signaling pathway	1/62	16/17913	0.0539862	0.177688	0.134164	NR3C1	1	T1
GO:0033631	cell-cell adhesion mediated by integrin	1/62	16/17913	0.0539862	0.177688	0.134164	ITGB1	1	T1
GO:0035970	peptidyl-threonine dephosphorylation	1/62	16/17913	0.0539862	0.177688	0.134164	DUSP4	1	T1
GO:0036035	osteoclast development	1/62	16/17913	0.0539862	0.177688	0.134164	FOXP1	1	T1
GO:0036124	histone H3-K9 trimethylation	1/62	16/17913	0.0539862	0.177688	0.134164	LMNA	1	T1
GO:0045623	negative regulation of T-helper cell differentiation	1/62	16/17913	0.0539862	0.177688	0.134164	ANXA1	1	T1
GO:0045725	positive regulation of glycogen biosynthetic process	1/62	16/17913	0.0539862	0.177688	0.134164	IRS2	1	T1
GO:0055012	ventricular cardiac muscle cell differentiation	1/62	16/17913	0.0539862	0.177688	0.134164	LMNA	1	T1
GO:0070293	renal absorption	1/62	16/17913	0.0539862	0.177688	0.134164	AQP3	1	T1
GO:1900153	positive regulation of nuclear-transcribed mRNA catabolic process, deadenylation-dependent decay	1/62	16/17913	0.0539862	0.177688	0.134164	ZFP36L2	1	T1
GO:1901317	regulation of flagellated sperm motility	1/62	16/17913	0.0539862	0.177688	0.134164	CCR6	1	T1
GO:2001170	negative regulation of ATP biosynthetic process	1/62	16/17913	0.0539862	0.177688	0.134164	DDIT4	1	T1
GO:0006978	DNA damage response, signal transduction by p53 class mediator resulting in transcription of p21 class mediator	1/62	17/17913	0.0572634	0.183306	0.138406	CDKN1A	1	T1
GO:0010224	response to UV-B	1/62	17/17913	0.0572634	0.183306	0.138406	CDKN1A	1	T1
GO:0034629	cellular protein-containing complex localization	1/62	17/17913	0.0572634	0.183306	0.138406	EZR	1	T1
GO:0043373	CD4-positive, alpha-beta T cell lineage commitment	1/62	17/17913	0.0572634	0.183306	0.138406	BATF	1	T1
GO:0070233	negative regulation of T cell apoptotic process	1/62	17/17913	0.0572634	0.183306	0.138406	IL7R	1	T1
GO:0070875	positive regulation of glycogen metabolic process	1/62	17/17913	0.0572634	0.183306	0.138406	IRS2	1	T1
GO:1903975	regulation of glial cell migration	1/62	17/17913	0.0572634	0.183306	0.138406	GPR183	1	T1
GO:2000641	regulation of early endosome to late endosome transport	1/62	17/17913	0.0572634	0.183306	0.138406	EZR	1	T1
GO:2000811	negative regulation of anoikis	1/62	17/17913	0.0572634	0.183306	0.138406	ITGB1	1	T1
GO:0001911	negative regulation of leukocyte mediated cytotoxicity	1/62	18/17913	0.0605295	0.186926	0.14114	IL7R	1	T1
GO:0030809	negative regulation of nucleotide biosynthetic process	1/62	18/17913	0.0605295	0.186926	0.14114	DDIT4	1	T1
GO:0031998	regulation of fatty acid beta-oxidation	1/62	18/17913	0.0605295	0.186926	0.14114	IRS2	1	T1
GO:0035994	response to muscle stretch	1/62	18/17913	0.0605295	0.186926	0.14114	FOS	1	T1
GO:0039535	regulation of RIG-I signaling pathway	1/62	18/17913	0.0605295	0.186926	0.14114	BIRC3	1	T1
GO:0042772	DNA damage response, signal transduction resulting in transcription	1/62	18/17913	0.0605295	0.186926	0.14114	CDKN1A	1	T1
GO:0043011	myeloid dendritic cell differentiation	1/62	18/17913	0.0605295	0.186926	0.14114	BATF	1	T1
GO:0048490	anterograde synaptic vesicle transport	1/62	18/17913	0.0605295	0.186926	0.14114	AP3M2	1	T1
GO:0099514	synaptic vesicle cytoskeletal transport	1/62	18/17913	0.0605295	0.186926	0.14114	AP3M2	1	T1
GO:0099517	synaptic vesicle transport along microtubule	1/62	18/17913	0.0605295	0.186926	0.14114	AP3M2	1	T1
GO:1900151	regulation of nuclear-transcribed mRNA catabolic process, deadenylation-dependent decay	1/62	18/17913	0.0605295	0.186926	0.14114	ZFP36L2	1	T1
GO:1900372	negative regulation of purine nucleotide biosynthetic process	1/62	18/17913	0.0605295	0.186926	0.14114	DDIT4	1	T1
GO:0002363	alpha-beta T cell lineage commitment	1/62	19/17913	0.0637845	0.187394	0.141493	BATF	1	T1
GO:0002577	regulation of antigen processing and presentation	1/62	19/17913	0.0637845	0.187394	0.141493	CCR7	1	T1
GO:0002710	negative regulation of T cell mediated immunity	1/62	19/17913	0.0637845	0.187394	0.141493	IL7R	1	T1
GO:0002827	positive regulation of T-helper 1 type immune response	1/62	19/17913	0.0637845	0.187394	0.141493	ANXA1	1	T1
GO:0002922	positive regulation of humoral immune response	1/62	19/17913	0.0637845	0.187394	0.141493	CCR7	1	T1
GO:0003159	morphogenesis of an endothelium	1/62	19/17913	0.0637845	0.187394	0.141493	FOXP1	1	T1
GO:0006833	water transport	1/62	19/17913	0.0637845	0.187394	0.141493	AQP3	1	T1
GO:0010612	regulation of cardiac muscle adaptation	1/62	19/17913	0.0637845	0.187394	0.141493	LMNA	1	T1
GO:0032495	response to muramyl dipeptide	1/62	19/17913	0.0637845	0.187394	0.141493	VIM	1	T1
GO:0032891	negative regulation of organic acid transport	1/62	19/17913	0.0637845	0.187394	0.141493	IRS2	1	T1
GO:0043153	entrainment of circadian clock by photoperiod	1/62	19/17913	0.0637845	0.187394	0.141493	PPP1CB	1	T1
GO:0045061	thymic T cell selection	1/62	19/17913	0.0637845	0.187394	0.141493	CCR7	1	T1
GO:0045063	T-helper 1 cell differentiation	1/62	19/17913	0.0637845	0.187394	0.141493	ANXA1	1	T1
GO:0045076	regulation of interleukin-2 biosynthetic process	1/62	19/17913	0.0637845	0.187394	0.141493	CD4	1	T1
GO:0050860	negative regulation of T cell receptor signaling pathway	1/62	19/17913	0.0637845	0.187394	0.141493	EZR	1	T1
GO:0060716	labyrinthine layer blood vessel development	1/62	19/17913	0.0637845	0.187394	0.141493	JUNB	1	T1
GO:0061154	endothelial tube morphogenesis	1/62	19/17913	0.0637845	0.187394	0.141493	FOXP1	1	T1
GO:0071731	response to nitric oxide	1/62	19/17913	0.0637845	0.187394	0.141493	CCR7	1	T1
GO:0090201	negative regulation of release of cytochrome c from mitochondria	1/62	19/17913	0.0637845	0.187394	0.141493	LMNA	1	T1
GO:1903242	regulation of cardiac muscle hypertrophy in response to stress	1/62	19/17913	0.0637845	0.187394	0.141493	LMNA	1	T1
GO:0002320	lymphoid progenitor cell differentiation	1/62	20/17913	0.0670283	0.189914	0.143396	BATF	1	T1
GO:0002438	acute inflammatory response to antigenic stimulus	1/62	20/17913	0.0670283	0.189914	0.143396	CCR7	1	T1
GO:0010560	positive regulation of glycoprotein biosynthetic process	1/62	20/17913	0.0670283	0.189914	0.143396	CCR7	1	T1
GO:0010801	negative regulation of peptidyl-threonine phosphorylation	1/62	20/17913	0.0670283	0.189914	0.143396	DDIT4	1	T1
GO:0039529	RIG-I signaling pathway	1/62	20/17913	0.0670283	0.189914	0.143396	BIRC3	1	T1
GO:0042832	defense response to protozoan	1/62	20/17913	0.0670283	0.189914	0.143396	BATF	1	T1
GO:0043369	CD4-positive or CD8-positive, alpha-beta T cell lineage commitment	1/62	20/17913	0.0670283	0.189914	0.143396	BATF	1	T1
GO:0043371	negative regulation of CD4-positive, alpha-beta T cell differentiation	1/62	20/17913	0.0670283	0.189914	0.143396	ANXA1	1	T1
GO:0051797	regulation of hair follicle development	1/62	20/17913	0.0670283	0.189914	0.143396	TRADD	1	T1
GO:0060216	definitive hemopoiesis	1/62	20/17913	0.0670283	0.189914	0.143396	ZFP36L2	1	T1
GO:0060713	labyrinthine layer morphogenesis	1/62	20/17913	0.0670283	0.189914	0.143396	SOCS3	1	T1
GO:0090195	chemokine secretion	1/62	20/17913	0.0670283	0.189914	0.143396	FOXP1	1	T1
GO:1900424	regulation of defense response to bacterium	1/62	20/17913	0.0670283	0.189914	0.143396	FOXP1	1	T1
GO:0001562	response to protozoan	1/62	21/17913	0.0702611	0.193277	0.145936	BATF	1	T1
GO:0005980	glycogen catabolic process	1/62	21/17913	0.0702611	0.193277	0.145936	PPP1CB	1	T1
GO:0035024	negative regulation of Rho protein signal transduction	1/62	21/17913	0.0702611	0.193277	0.145936	ITGB1	1	T1
GO:0039531	regulation of viral-induced cytoplasmic pattern recognition receptor signaling pathway	1/62	21/17913	0.0702611	0.193277	0.145936	BIRC3	1	T1
GO:0051043	regulation of membrane protein ectodomain proteolysis	1/62	21/17913	0.0702611	0.193277	0.145936	TIMP1	1	T1
GO:0055093	response to hyperoxia	1/62	21/17913	0.0702611	0.193277	0.145936	CDKN1A	1	T1
GO:0060575	intestinal epithelial cell differentiation	1/62	21/17913	0.0702611	0.193277	0.145936	CDKN1A	1	T1
GO:0071711	basement membrane organization	1/62	21/17913	0.0702611	0.193277	0.145936	ITGB1	1	T1
GO:0097709	connective tissue replacement	1/62	21/17913	0.0702611	0.193277	0.145936	TIMP1	1	T1
GO:2000737	negative regulation of stem cell differentiation	1/62	21/17913	0.0702611	0.193277	0.145936	ZFP36L2	1	T1
GO:0009251	glucan catabolic process	1/62	22/17913	0.0734829	0.195809	0.147847	PPP1CB	1	T1
GO:0031342	negative regulation of cell killing	1/62	22/17913	0.0734829	0.195809	0.147847	IL7R	1	T1
GO:0034695	response to prostaglandin E	1/62	22/17913	0.0734829	0.195809	0.147847	CCR7	1	T1
GO:0036010	protein localization to endosome	1/62	22/17913	0.0734829	0.195809	0.147847	EZR	1	T1
GO:0036037	CD8-positive, alpha-beta T cell activation	1/62	22/17913	0.0734829	0.195809	0.147847	SOCS1	1	T1
GO:0042094	interleukin-2 biosynthetic process	1/62	22/17913	0.0734829	0.195809	0.147847	CD4	1	T1
GO:0045109	intermediate filament organization	1/62	22/17913	0.0734829	0.195809	0.147847	VIM	1	T1
GO:0045624	positive regulation of T-helper cell differentiation	1/62	22/17913	0.0734829	0.195809	0.147847	ANXA1	1	T1
GO:0048103	somatic stem cell division	1/62	22/17913	0.0734829	0.195809	0.147847	ZFP36L2	1	T1
GO:0051195	negative regulation of cofactor metabolic process	1/62	22/17913	0.0734829	0.195809	0.147847	DDIT4	1	T1
GO:0072643	interferon-gamma secretion	1/62	22/17913	0.0734829	0.195809	0.147847	CD2	1	T1
GO:0090343	positive regulation of cell aging	1/62	22/17913	0.0734829	0.195809	0.147847	LMNA	1	T1
GO:0009648	photoperiodism	1/62	23/17913	0.0766936	0.201034	0.151792	PPP1CB	1	T1
GO:0032703	negative regulation of interleukin-2 production	1/62	23/17913	0.0766936	0.201034	0.151792	EZR	1	T1
GO:0032753	positive regulation of interleukin-4 production	1/62	23/17913	0.0766936	0.201034	0.151792	CD40LG	1	T1
GO:0044247	cellular polysaccharide catabolic process	1/62	23/17913	0.0766936	0.201034	0.151792	PPP1CB	1	T1
GO:0048240	sperm capacitation	1/62	23/17913	0.0766936	0.201034	0.151792	CCR6	1	T1
GO:0051570	regulation of histone H3-K9 methylation	1/62	23/17913	0.0766936	0.201034	0.151792	LMNA	1	T1
GO:0071404	cellular response to low-density lipoprotein particle stimulus	1/62	23/17913	0.0766936	0.201034	0.151792	ITGB1	1	T1
GO:0000188	inactivation of MAPK activity	1/62	24/17913	0.0798935	0.204523	0.154426	DUSP4	1	T1
GO:0001914	regulation of T cell mediated cytotoxicity	1/62	24/17913	0.0798935	0.204523	0.154426	IL7R	1	T1
GO:0002861	regulation of inflammatory response to antigenic stimulus	1/62	24/17913	0.0798935	0.204523	0.154426	CCR7	1	T1
GO:0030325	adrenal gland development	1/62	24/17913	0.0798935	0.204523	0.154426	ARID5B	1	T1
GO:0032717	negative regulation of interleukin-8 production	1/62	24/17913	0.0798935	0.204523	0.154426	ANXA1	1	T1
GO:0033081	regulation of T cell differentiation in thymus	1/62	24/17913	0.0798935	0.204523	0.154426	IL7R	1	T1
GO:0046697	decidualization	1/62	24/17913	0.0798935	0.204523	0.154426	JUNB	1	T1
GO:0050996	positive regulation of lipid catabolic process	1/62	24/17913	0.0798935	0.204523	0.154426	IRS2	1	T1
GO:0051642	centrosome localization	1/62	24/17913	0.0798935	0.204523	0.154426	EZR	1	T1
GO:0090023	positive regulation of neutrophil chemotaxis	1/62	24/17913	0.0798935	0.204523	0.154426	CCR7	1	T1
GO:1903020	positive regulation of glycoprotein metabolic process	1/62	24/17913	0.0798935	0.204523	0.154426	CCR7	1	T1
GO:1903649	regulation of cytoplasmic transport	1/62	24/17913	0.0798935	0.204523	0.154426	EZR	1	T1
GO:2000209	regulation of anoikis	1/62	24/17913	0.0798935	0.204523	0.154426	ITGB1	1	T1
GO:0000272	polysaccharide catabolic process	1/62	25/17913	0.0830824	0.207528	0.156696	PPP1CB	1	T1
GO:0009649	entrainment of circadian clock	1/62	25/17913	0.0830824	0.207528	0.156696	PPP1CB	1	T1
GO:0010818	T cell chemotaxis	1/62	25/17913	0.0830824	0.207528	0.156696	GPR183	1	T1
GO:0031338	regulation of vesicle fusion	1/62	25/17913	0.0830824	0.207528	0.156696	ANXA1	1	T1
GO:0034110	regulation of homotypic cell-cell adhesion	1/62	25/17913	0.0830824	0.207528	0.156696	LGALS1	1	T1
GO:0045672	positive regulation of osteoclast differentiation	1/62	25/17913	0.0830824	0.207528	0.156696	FOS	1	T1
GO:0050901	leukocyte tethering or rolling	1/62	25/17913	0.0830824	0.207528	0.156696	ITGB1	1	T1
GO:0051894	positive regulation of focal adhesion assembly	1/62	25/17913	0.0830824	0.207528	0.156696	S100A10	1	T1
GO:0060669	embryonic placenta morphogenesis	1/62	25/17913	0.0830824	0.207528	0.156696	SOCS3	1	T1
GO:0061842	microtubule organizing center localization	1/62	25/17913	0.0830824	0.207528	0.156696	EZR	1	T1
GO:2000353	positive regulation of endothelial cell apoptotic process	1/62	25/17913	0.0830824	0.207528	0.156696	CD40LG	1	T1
GO:0002053	positive regulation of mesenchymal cell proliferation	1/62	26/17913	0.0862604	0.209787	0.158401	IRS2	1	T1
GO:0002360	T cell lineage commitment	1/62	26/17913	0.0862604	0.209787	0.158401	BATF	1	T1
GO:0002507	tolerance induction	1/62	26/17913	0.0862604	0.209787	0.158401	ICOS	1	T1
GO:0002825	regulation of T-helper 1 type immune response	1/62	26/17913	0.0862604	0.209787	0.158401	ANXA1	1	T1
GO:0032967	positive regulation of collagen biosynthetic process	1/62	26/17913	0.0862604	0.209787	0.158401	VIM	1	T1
GO:0039528	cytoplasmic pattern recognition receptor signaling pathway in response to virus	1/62	26/17913	0.0862604	0.209787	0.158401	BIRC3	1	T1
GO:0042044	fluid transport	1/62	26/17913	0.0862604	0.209787	0.158401	AQP3	1	T1
GO:0060706	cell differentiation involved in embryonic placenta development	1/62	26/17913	0.0862604	0.209787	0.158401	SOCS3	1	T1
GO:0071624	positive regulation of granulocyte chemotaxis	1/62	26/17913	0.0862604	0.209787	0.158401	CCR7	1	T1
GO:0072539	T-helper 17 cell differentiation	1/62	26/17913	0.0862604	0.209787	0.158401	BATF	1	T1
GO:1903579	negative regulation of ATP metabolic process	1/62	26/17913	0.0862604	0.209787	0.158401	DDIT4	1	T1
GO:1903792	negative regulation of anion transport	1/62	26/17913	0.0862604	0.209787	0.158401	IRS2	1	T1
GO:1903959	regulation of anion transmembrane transport	1/62	26/17913	0.0862604	0.209787	0.158401	IRS2	1	T1
GO:1905048	regulation of metallopeptidase activity	1/62	26/17913	0.0862604	0.209787	0.158401	TIMP1	1	T1
GO:0010714	positive regulation of collagen metabolic process	1/62	27/17913	0.0894276	0.213045	0.160861	VIM	1	T1
GO:0019054	modulation by virus of host process	1/62	27/17913	0.0894276	0.213045	0.160861	CD4	1	T1
GO:0032673	regulation of interleukin-4 production	1/62	27/17913	0.0894276	0.213045	0.160861	CD40LG	1	T1
GO:0033137	negative regulation of peptidyl-serine phosphorylation	1/62	27/17913	0.0894276	0.213045	0.160861	DDIT4	1	T1
GO:0035902	response to immobilization stress	1/62	27/17913	0.0894276	0.213045	0.160861	FOS	1	T1
GO:0050858	negative regulation of antigen receptor-mediated signaling pathway	1/62	27/17913	0.0894276	0.213045	0.160861	EZR	1	T1
GO:0060544	regulation of necroptotic process	1/62	27/17913	0.0894276	0.213045	0.160861	BIRC3	1	T1
GO:1902624	positive regulation of neutrophil migration	1/62	27/17913	0.0894276	0.213045	0.160861	CCR7	1	T1
GO:2000191	regulation of fatty acid transport	1/62	27/17913	0.0894276	0.213045	0.160861	IRS2	1	T1
GO:2000515	negative regulation of CD4-positive, alpha-beta T cell activation	1/62	27/17913	0.0894276	0.213045	0.160861	ANXA1	1	T1
GO:0010165	response to X-ray	1/62	28/17913	0.092584	0.216153	0.163208	CDKN1A	1	T1
GO:0016339	calcium-dependent cell-cell adhesion via plasma membrane cell adhesion molecules	1/62	28/17913	0.092584	0.216153	0.163208	FXYD5	1	T1
GO:0036296	response to increased oxygen levels	1/62	28/17913	0.092584	0.216153	0.163208	CDKN1A	1	T1
GO:0042634	regulation of hair cycle	1/62	28/17913	0.092584	0.216153	0.163208	TRADD	1	T1
GO:0045577	regulation of B cell differentiation	1/62	28/17913	0.092584	0.216153	0.163208	ZFP36L2	1	T1
GO:0050855	regulation of B cell receptor signaling pathway	1/62	28/17913	0.092584	0.216153	0.163208	FOXP1	1	T1
GO:0050869	negative regulation of B cell activation	1/62	28/17913	0.092584	0.216153	0.163208	SAMSN1	1	T1
GO:0060765	regulation of androgen receptor signaling pathway	1/62	28/17913	0.092584	0.216153	0.163208	FOXP1	1	T1
GO:0070306	lens fiber cell differentiation	1/62	28/17913	0.092584	0.216153	0.163208	VIM	1	T1
GO:1900543	negative regulation of purine nucleotide metabolic process	1/62	28/17913	0.092584	0.216153	0.163208	DDIT4	1	T1
GO:0010737	protein kinase A signaling	1/62	29/17913	0.0957297	0.219401	0.165661	EZR	1	T1
GO:0035666	TRIF-dependent toll-like receptor signaling pathway	1/62	29/17913	0.0957297	0.219401	0.165661	BIRC3	1	T1
GO:0045980	negative regulation of nucleotide metabolic process	1/62	29/17913	0.0957297	0.219401	0.165661	DDIT4	1	T1
GO:0046627	negative regulation of insulin receptor signaling pathway	1/62	29/17913	0.0957297	0.219401	0.165661	SOCS1	1	T1
GO:0070102	interleukin-6-mediated signaling pathway	1/62	29/17913	0.0957297	0.219401	0.165661	SOCS3	1	T1
GO:0071480	cellular response to gamma radiation	1/62	29/17913	0.0957297	0.219401	0.165661	CDKN1A	1	T1
GO:0072538	T-helper 17 type immune response	1/62	29/17913	0.0957297	0.219401	0.165661	BATF	1	T1
GO:0002828	regulation of type 2 immune response	1/62	30/17913	0.0988646	0.22337	0.168657	ANXA1	1	T1
GO:0034694	response to prostaglandin	1/62	30/17913	0.0988646	0.22337	0.168657	CCR7	1	T1
GO:0046320	regulation of fatty acid oxidation	1/62	30/17913	0.0988646	0.22337	0.168657	IRS2	1	T1
GO:0050690	regulation of defense response to virus by virus	1/62	30/17913	0.0988646	0.22337	0.168657	CD4	1	T1
GO:0051491	positive regulation of filopodium assembly	1/62	30/17913	0.0988646	0.22337	0.168657	CCR7	1	T1
GO:0060325	face morphogenesis	1/62	30/17913	0.0988646	0.22337	0.168657	ARID5B	1	T1
GO:0090022	regulation of neutrophil chemotaxis	1/62	30/17913	0.0988646	0.22337	0.168657	CCR7	1	T1
GO:0002675	positive regulation of acute inflammatory response	1/62	31/17913	0.101989	0.224915	0.169824	CCR7	1	T1
GO:0006658	phosphatidylserine metabolic process	1/62	31/17913	0.101989	0.224915	0.169824	SERINC5	1	T1
GO:0030431	sleep	1/62	31/17913	0.101989	0.224915	0.169824	FOS	1	T1
GO:0030866	cortical actin cytoskeleton organization	1/62	31/17913	0.101989	0.224915	0.169824	EZR	1	T1
GO:0031122	cytoplasmic microtubule organization	1/62	31/17913	0.101989	0.224915	0.169824	EZR	1	T1
GO:0033687	osteoblast proliferation	1/62	31/17913	0.101989	0.224915	0.169824	JUNB	1	T1
GO:0044068	modulation by symbiont of host cellular process	1/62	31/17913	0.101989	0.224915	0.169824	CD4	1	T1
GO:0045920	negative regulation of exocytosis	1/62	31/17913	0.101989	0.224915	0.169824	ANXA1	1	T1
GO:1900077	negative regulation of cellular response to insulin stimulus	1/62	31/17913	0.101989	0.224915	0.169824	SOCS1	1	T1
GO:1902230	negative regulation of intrinsic apoptotic signaling pathway in response to DNA damage	1/62	31/17913	0.101989	0.224915	0.169824	TPT1	1	T1
GO:1903393	positive regulation of adherens junction organization	1/62	31/17913	0.101989	0.224915	0.169824	S100A10	1	T1
GO:1903432	regulation of TORC1 signaling	1/62	31/17913	0.101989	0.224915	0.169824	SESN3	1	T1
GO:0003299	muscle hypertrophy in response to stress	1/62	32/17913	0.105102	0.226923	0.17134	LMNA	1	T1
GO:0014887	cardiac muscle adaptation	1/62	32/17913	0.105102	0.226923	0.17134	LMNA	1	T1
GO:0014898	cardiac muscle hypertrophy in response to stress	1/62	32/17913	0.105102	0.226923	0.17134	LMNA	1	T1
GO:0032633	interleukin-4 production	1/62	32/17913	0.105102	0.226923	0.17134	CD40LG	1	T1
GO:0032733	positive regulation of interleukin-10 production	1/62	32/17913	0.105102	0.226923	0.17134	CD40LG	1	T1
GO:0040018	positive regulation of multicellular organism growth	1/62	32/17913	0.105102	0.226923	0.17134	EZR	1	T1
GO:0043368	positive T cell selection	1/62	32/17913	0.105102	0.226923	0.17134	BATF	1	T1
GO:0043552	positive regulation of phosphatidylinositol 3-kinase activity	1/62	32/17913	0.105102	0.226923	0.17134	CCR7	1	T1
GO:0046685	response to arsenic-containing substance	1/62	32/17913	0.105102	0.226923	0.17134	CDKN1A	1	T1
GO:0070232	regulation of T cell apoptotic process	1/62	32/17913	0.105102	0.226923	0.17134	IL7R	1	T1
GO:0071276	cellular response to cadmium ion	1/62	32/17913	0.105102	0.226923	0.17134	FOS	1	T1
GO:0071709	membrane assembly	1/62	32/17913	0.105102	0.226923	0.17134	S100A10	1	T1
GO:1904031	positive regulation of cyclin-dependent protein kinase activity	1/62	32/17913	0.105102	0.226923	0.17134	CDKN1A	1	T1
GO:0001913	T cell mediated cytotoxicity	1/62	33/17913	0.108205	0.229936	0.173615	IL7R	1	T1
GO:0002756	MyD88-independent toll-like receptor signaling pathway	1/62	33/17913	0.108205	0.229936	0.173615	BIRC3	1	T1
GO:0045589	regulation of regulatory T cell differentiation	1/62	33/17913	0.108205	0.229936	0.173615	SOCS1	1	T1
GO:0045736	negative regulation of cyclin-dependent protein serine/threonine kinase activity	1/62	33/17913	0.108205	0.229936	0.173615	CDKN1A	1	T1
GO:0048011	neurotrophin TRK receptor signaling pathway	1/62	33/17913	0.108205	0.229936	0.173615	DDIT4	1	T1
GO:0048147	negative regulation of fibroblast proliferation	1/62	33/17913	0.108205	0.229936	0.173615	FTH1	1	T1
GO:0055094	response to lipoprotein particle	1/62	33/17913	0.108205	0.229936	0.173615	ITGB1	1	T1
GO:0098751	bone cell development	1/62	33/17913	0.108205	0.229936	0.173615	FOXP1	1	T1
GO:1901890	positive regulation of cell junction assembly	1/62	33/17913	0.108205	0.229936	0.173615	S100A10	1	T1
GO:0043276	anoikis	1/62	34/17913	0.111298	0.233672	0.176436	ITGB1	1	T1
GO:0045730	respiratory burst	1/62	34/17913	0.111298	0.233672	0.176436	CD52	1	T1
GO:1901385	regulation of voltage-gated calcium channel activity	1/62	34/17913	0.111298	0.233672	0.176436	AHNAK	1	T1
GO:1902622	regulation of neutrophil migration	1/62	34/17913	0.111298	0.233672	0.176436	CCR7	1	T1
GO:1904030	negative regulation of cyclin-dependent protein kinase activity	1/62	34/17913	0.111298	0.233672	0.176436	CDKN1A	1	T1
GO:0001893	maternal placenta development	1/62	35/17913	0.114379	0.236177	0.178327	JUNB	1	T1
GO:0007257	activation of JUN kinase activity	1/62	35/17913	0.114379	0.236177	0.178327	CD40LG	1	T1
GO:0030865	cortical cytoskeleton organization	1/62	35/17913	0.114379	0.236177	0.178327	EZR	1	T1
GO:0045066	regulatory T cell differentiation	1/62	35/17913	0.114379	0.236177	0.178327	SOCS1	1	T1
GO:0045622	regulation of T-helper cell differentiation	1/62	35/17913	0.114379	0.236177	0.178327	ANXA1	1	T1
GO:0045923	positive regulation of fatty acid metabolic process	1/62	35/17913	0.114379	0.236177	0.178327	IRS2	1	T1
GO:0048333	mesodermal cell differentiation	1/62	35/17913	0.114379	0.236177	0.178327	ITGB1	1	T1
GO:0060323	head morphogenesis	1/62	35/17913	0.114379	0.236177	0.178327	ARID5B	1	T1
GO:0070423	nucleotide-binding oligomerization domain containing signaling pathway	1/62	35/17913	0.114379	0.236177	0.178327	BIRC3	1	T1
GO:0071402	cellular response to lipoprotein particle stimulus	1/62	35/17913	0.114379	0.236177	0.178327	ITGB1	1	T1
GO:0003091	renal water homeostasis	1/62	36/17913	0.117451	0.239135	0.180561	AQP3	1	T1
GO:0008156	negative regulation of DNA replication	1/62	36/17913	0.117451	0.239135	0.180561	S100A11	1	T1
GO:0033144	negative regulation of intracellular steroid hormone receptor signaling pathway	1/62	36/17913	0.117451	0.239135	0.180561	FOXP1	1	T1
GO:0035872	nucleotide-binding domain, leucine rich repeat containing receptor signaling pathway	1/62	36/17913	0.117451	0.239135	0.180561	BIRC3	1	T1
GO:0050892	intestinal absorption	1/62	36/17913	0.117451	0.239135	0.180561	EZR	1	T1
GO:0090218	positive regulation of lipid kinase activity	1/62	36/17913	0.117451	0.239135	0.180561	CCR7	1	T1
GO:1900026	positive regulation of substrate adhesion-dependent cell spreading	1/62	36/17913	0.117451	0.239135	0.180561	S100A10	1	T1
GO:0010614	negative regulation of cardiac muscle hypertrophy	1/62	37/17913	0.120512	0.242485	0.18309	LMNA	1	T1
GO:0030574	collagen catabolic process	1/62	37/17913	0.120512	0.242485	0.18309	ITGB1	1	T1
GO:0044091	membrane biogenesis	1/62	37/17913	0.120512	0.242485	0.18309	S100A10	1	T1
GO:0045214	sarcomere organization	1/62	37/17913	0.120512	0.242485	0.18309	ITGB1	1	T1
GO:0045684	positive regulation of epidermis development	1/62	37/17913	0.120512	0.242485	0.18309	TRADD	1	T1
GO:0046326	positive regulation of glucose import	1/62	37/17913	0.120512	0.242485	0.18309	IRS2	1	T1
GO:0046676	negative regulation of insulin secretion	1/62	37/17913	0.120512	0.242485	0.18309	PIM3	1	T1
GO:0051567	histone H3-K9 methylation	1/62	37/17913	0.120512	0.242485	0.18309	LMNA	1	T1
GO:0001825	blastocyst formation	1/62	38/17913	0.123562	0.245025	0.185008	JUNB	1	T1
GO:0002707	negative regulation of lymphocyte mediated immunity	1/62	38/17913	0.123562	0.245025	0.185008	IL7R	1	T1
GO:0010559	regulation of glycoprotein biosynthetic process	1/62	38/17913	0.123562	0.245025	0.185008	CCR7	1	T1
GO:0038202	TORC1 signaling	1/62	38/17913	0.123562	0.245025	0.185008	SESN3	1	T1
GO:0042149	cellular response to glucose starvation	1/62	38/17913	0.123562	0.245025	0.185008	SESN3	1	T1
GO:0045022	early endosome to late endosome transport	1/62	38/17913	0.123562	0.245025	0.185008	EZR	1	T1
GO:0047496	vesicle transport along microtubule	1/62	38/17913	0.123562	0.245025	0.185008	AP3M2	1	T1
GO:0090050	positive regulation of cell migration involved in sprouting angiogenesis	1/62	38/17913	0.123562	0.245025	0.185008	ANXA1	1	T1
GO:1902042	negative regulation of extrinsic apoptotic signaling pathway via death domain receptors	1/62	38/17913	0.123562	0.245025	0.185008	TRADD	1	T1
GO:1904037	positive regulation of epithelial cell apoptotic process	1/62	38/17913	0.123562	0.245025	0.185008	CD40LG	1	T1
GO:0010939	regulation of necrotic cell death	1/62	39/17913	0.126602	0.247135	0.186601	BIRC3	1	T1
GO:0014741	negative regulation of muscle hypertrophy	1/62	39/17913	0.126602	0.247135	0.186601	LMNA	1	T1
GO:0017145	stem cell division	1/62	39/17913	0.126602	0.247135	0.186601	ZFP36L2	1	T1
GO:0030049	muscle filament sliding	1/62	39/17913	0.126602	0.247135	0.186601	VIM	1	T1
GO:0030204	chondroitin sulfate metabolic process	1/62	39/17913	0.126602	0.247135	0.186601	SPOCK2	1	T1
GO:0031062	positive regulation of histone methylation	1/62	39/17913	0.126602	0.247135	0.186601	LMNA	1	T1
GO:0033275	actin-myosin filament sliding	1/62	39/17913	0.126602	0.247135	0.186601	VIM	1	T1
GO:0038179	neurotrophin signaling pathway	1/62	39/17913	0.126602	0.247135	0.186601	DDIT4	1	T1
GO:0044275	cellular carbohydrate catabolic process	1/62	39/17913	0.126602	0.247135	0.186601	PPP1CB	1	T1
GO:0045616	regulation of keratinocyte differentiation	1/62	39/17913	0.126602	0.247135	0.186601	AQP3	1	T1
GO:1902229	regulation of intrinsic apoptotic signaling pathway in response to DNA damage	1/62	39/17913	0.126602	0.247135	0.186601	TPT1	1	T1
GO:0002823	negative regulation of adaptive immune response based on somatic recombination of immune receptors built from immunoglobulin superfamily domains	1/62	40/17913	0.129631	0.250087	0.18883	IL7R	1	T1
GO:0006509	membrane protein ectodomain proteolysis	1/62	40/17913	0.129631	0.250087	0.18883	TIMP1	1	T1
GO:0061028	establishment of endothelial barrier	1/62	40/17913	0.129631	0.250087	0.18883	EZR	1	T1
GO:2000273	positive regulation of signaling receptor activity	1/62	40/17913	0.129631	0.250087	0.18883	ITGB1	1	T1
GO:0002639	positive regulation of immunoglobulin production	1/62	41/17913	0.132651	0.251921	0.190215	TNFRSF4	1	T1
GO:0010677	negative regulation of cellular carbohydrate metabolic process	1/62	41/17913	0.132651	0.251921	0.190215	DDIT4	1	T1
GO:0010907	positive regulation of glucose metabolic process	1/62	41/17913	0.132651	0.251921	0.190215	IRS2	1	T1
GO:0014002	astrocyte development	1/62	41/17913	0.132651	0.251921	0.190215	VIM	1	T1
GO:0019048	modulation by virus of host morphology or physiology	1/62	41/17913	0.132651	0.251921	0.190215	CD4	1	T1
GO:0060612	adipose tissue development	1/62	41/17913	0.132651	0.251921	0.190215	ARID5B	1	T1
GO:0090278	negative regulation of peptide hormone secretion	1/62	41/17913	0.132651	0.251921	0.190215	PIM3	1	T1
GO:0098927	vesicle-mediated transport between endosomal compartments	1/62	41/17913	0.132651	0.251921	0.190215	EZR	1	T1
GO:1904706	negative regulation of vascular smooth muscle cell proliferation	1/62	41/17913	0.132651	0.251921	0.190215	CDKN1A	1	T1
GO:2000404	regulation of T cell migration	1/62	41/17913	0.132651	0.251921	0.190215	CCR6	1	T1
GO:0009069	serine family amino acid metabolic process	1/62	42/17913	0.13566	0.25461	0.192245	SERINC5	1	T1
GO:0018023	peptidyl-lysine trimethylation	1/62	42/17913	0.13566	0.25461	0.192245	LMNA	1	T1
GO:0042088	T-helper 1 type immune response	1/62	42/17913	0.13566	0.25461	0.192245	ANXA1	1	T1
GO:0045104	intermediate filament cytoskeleton organization	1/62	42/17913	0.13566	0.25461	0.192245	VIM	1	T1
GO:0048247	lymphocyte chemotaxis	1/62	42/17913	0.13566	0.25461	0.192245	GPR183	1	T1
GO:0050654	chondroitin sulfate proteoglycan metabolic process	1/62	42/17913	0.13566	0.25461	0.192245	SPOCK2	1	T1
GO:0051489	regulation of filopodium assembly	1/62	42/17913	0.13566	0.25461	0.192245	CCR7	1	T1
GO:0008089	anterograde axonal transport	1/62	43/17913	0.138658	0.25774	0.194608	AP3M2	1	T1
GO:0009409	response to cold	1/62	43/17913	0.138658	0.25774	0.194608	FOS	1	T1
GO:0010761	fibroblast migration	1/62	43/17913	0.138658	0.25774	0.194608	ARID5B	1	T1
GO:0010828	positive regulation of glucose transmembrane transport	1/62	43/17913	0.138658	0.25774	0.194608	IRS2	1	T1
GO:0045103	intermediate filament-based process	1/62	43/17913	0.138658	0.25774	0.194608	VIM	1	T1
GO:0050850	positive regulation of calcium-mediated signaling	1/62	43/17913	0.138658	0.25774	0.194608	CD4	1	T1
GO:0071364	cellular response to epidermal growth factor stimulus	1/62	43/17913	0.138658	0.25774	0.194608	ZFP36L2	1	T1
GO:0099518	vesicle cytoskeletal trafficking	1/62	43/17913	0.138658	0.25774	0.194608	AP3M2	1	T1
GO:1901031	regulation of response to reactive oxygen species	1/62	43/17913	0.138658	0.25774	0.194608	SESN3	1	T1
GO:0002437	inflammatory response to antigenic stimulus	1/62	44/17913	0.141647	0.261628	0.197544	CCR7	1	T1
GO:0002548	monocyte chemotaxis	1/62	44/17913	0.141647	0.261628	0.197544	ANXA1	1	T1
GO:0030225	macrophage differentiation	1/62	44/17913	0.141647	0.261628	0.197544	CD4	1	T1
GO:0032965	regulation of collagen biosynthetic process	1/62	44/17913	0.141647	0.261628	0.197544	VIM	1	T1
GO:0051205	protein insertion into membrane	1/62	44/17913	0.141647	0.261628	0.197544	MAL	1	T1
GO:0071622	regulation of granulocyte chemotaxis	1/62	44/17913	0.141647	0.261628	0.197544	CCR7	1	T1
GO:0006998	nuclear envelope organization	1/62	45/17913	0.144625	0.265449	0.200429	LMNA	1	T1
GO:0032570	response to progesterone	1/62	45/17913	0.144625	0.265449	0.200429	FOS	1	T1
GO:0046580	negative regulation of Ras protein signal transduction	1/62	45/17913	0.144625	0.265449	0.200429	ITGB1	1	T1
GO:0061756	leukocyte adhesion to vascular endothelial cell	1/62	45/17913	0.144625	0.265449	0.200429	ITGB1	1	T1
GO:0070266	necroptotic process	1/62	45/17913	0.144625	0.265449	0.200429	BIRC3	1	T1
GO:1903018	regulation of glycoprotein metabolic process	1/62	45/17913	0.144625	0.265449	0.200429	CCR7	1	T1
GO:0010799	regulation of peptidyl-threonine phosphorylation	1/62	46/17913	0.147593	0.268365	0.202631	DDIT4	1	T1
GO:0032369	negative regulation of lipid transport	1/62	46/17913	0.147593	0.268365	0.202631	IRS2	1	T1
GO:0032757	positive regulation of interleukin-8 production	1/62	46/17913	0.147593	0.268365	0.202631	CD2	1	T1
GO:0060324	face development	1/62	46/17913	0.147593	0.268365	0.202631	ARID5B	1	T1
GO:0070231	T cell apoptotic process	1/62	46/17913	0.147593	0.268365	0.202631	IL7R	1	T1
GO:0071354	cellular response to interleukin-6	1/62	46/17913	0.147593	0.268365	0.202631	SOCS3	1	T1
GO:0090199	regulation of release of cytochrome c from mitochondria	1/62	46/17913	0.147593	0.268365	0.202631	LMNA	1	T1
GO:0008542	visual learning	1/62	47/17913	0.150551	0.27093	0.204567	ITGB1	1	T1
GO:0035722	interleukin-12-mediated signaling pathway	1/62	47/17913	0.150551	0.27093	0.204567	RPLP0	1	T1
GO:0045912	negative regulation of carbohydrate metabolic process	1/62	47/17913	0.150551	0.27093	0.204567	DDIT4	1	T1
GO:0070849	response to epidermal growth factor	1/62	47/17913	0.150551	0.27093	0.204567	ZFP36L2	1	T1
GO:0090630	activation of GTPase activity	1/62	47/17913	0.150551	0.27093	0.204567	CCR7	1	T1
GO:1900744	regulation of p38MAPK cascade	1/62	47/17913	0.150551	0.27093	0.204567	EZR	1	T1
GO:0002704	negative regulation of leukocyte mediated immunity	1/62	48/17913	0.153499	0.273456	0.206475	IL7R	1	T1
GO:0010171	body morphogenesis	1/62	48/17913	0.153499	0.273456	0.206475	ARID5B	1	T1
GO:0032653	regulation of interleukin-10 production	1/62	48/17913	0.153499	0.273456	0.206475	CD40LG	1	T1
GO:0044003	modification by symbiont of host morphology or physiology	1/62	48/17913	0.153499	0.273456	0.206475	CD4	1	T1
GO:0061647	histone H3-K9 modification	1/62	48/17913	0.153499	0.273456	0.206475	LMNA	1	T1
GO:1903727	positive regulation of phospholipid metabolic process	1/62	48/17913	0.153499	0.273456	0.206475	CCR7	1	T1
GO:0031529	ruffle organization	1/62	49/17913	0.156437	0.276967	0.209126	CCR7	1	T1
GO:0071349	cellular response to interleukin-12	1/62	49/17913	0.156437	0.276967	0.209126	RPLP0	1	T1
GO:0097300	programmed necrotic cell death	1/62	49/17913	0.156437	0.276967	0.209126	BIRC3	1	T1
GO:2001238	positive regulation of extrinsic apoptotic signaling pathway	1/62	49/17913	0.156437	0.276967	0.209126	MAL	1	T1
GO:0008347	glial cell migration	1/62	50/17913	0.159364	0.279606	0.211119	GPR183	1	T1
GO:0032873	negative regulation of stress-activated MAPK cascade	1/62	50/17913	0.159364	0.279606	0.211119	EZR	1	T1
GO:0070303	negative regulation of stress-activated protein kinase signaling cascade	1/62	50/17913	0.159364	0.279606	0.211119	EZR	1	T1
GO:0070671	response to interleukin-12	1/62	50/17913	0.159364	0.279606	0.211119	RPLP0	1	T1
GO:0070741	response to interleukin-6	1/62	50/17913	0.159364	0.279606	0.211119	SOCS3	1	T1
GO:0030239	myofibril assembly	1/62	51/17913	0.162282	0.281621	0.21264	ITGB1	1	T1
GO:0032613	interleukin-10 production	1/62	51/17913	0.162282	0.281621	0.21264	CD40LG	1	T1
GO:0045599	negative regulation of fat cell differentiation	1/62	51/17913	0.162282	0.281621	0.21264	ZFP36L2	1	T1
GO:0046579	positive regulation of Ras protein signal transduction	1/62	51/17913	0.162282	0.281621	0.21264	IRS2	1	T1
GO:0048146	positive regulation of fibroblast proliferation	1/62	51/17913	0.162282	0.281621	0.21264	CDKN1A	1	T1
GO:0051058	negative regulation of small GTPase mediated signal transduction	1/62	51/17913	0.162282	0.281621	0.21264	ITGB1	1	T1
GO:0051496	positive regulation of stress fiber assembly	1/62	51/17913	0.162282	0.281621	0.21264	S100A10	1	T1
GO:0097366	response to bronchodilator	1/62	51/17913	0.162282	0.281621	0.21264	CCR7	1	T1
GO:0098930	axonal transport	1/62	51/17913	0.162282	0.281621	0.21264	AP3M2	1	T1
GO:1900024	regulation of substrate adhesion-dependent cell spreading	1/62	51/17913	0.162282	0.281621	0.21264	S100A10	1	T1
GO:1901607	alpha-amino acid biosynthetic process	1/62	51/17913	0.162282	0.281621	0.21264	SERINC5	1	T1
GO:0007566	embryo implantation	1/62	52/17913	0.16519	0.284412	0.214748	TIMP1	1	T1
GO:0007632	visual behavior	1/62	52/17913	0.16519	0.284412	0.214748	ITGB1	1	T1
GO:0071320	cellular response to cAMP	1/62	52/17913	0.16519	0.284412	0.214748	EZR	1	T1
GO:2000242	negative regulation of reproductive process	1/62	52/17913	0.16519	0.284412	0.214748	TIMP1	1	T1
GO:0032964	collagen biosynthetic process	1/62	53/17913	0.168088	0.287704	0.217233	VIM	1	T1
GO:0038066	p38MAPK cascade	1/62	53/17913	0.168088	0.287704	0.217233	EZR	1	T1
GO:0050853	B cell receptor signaling pathway	1/62	53/17913	0.168088	0.287704	0.217233	FOXP1	1	T1
GO:0050994	regulation of lipid catabolic process	1/62	53/17913	0.168088	0.287704	0.217233	IRS2	1	T1
GO:0051290	protein heterotetramerization	1/62	53/17913	0.168088	0.287704	0.217233	S100A10	1	T1
GO:0010524	positive regulation of calcium ion transport into cytosol	1/62	54/17913	0.170976	0.290941	0.219677	CD4	1	T1
GO:0010823	negative regulation of mitochondrion organization	1/62	54/17913	0.170976	0.290941	0.219677	LMNA	1	T1
GO:0061178	regulation of insulin secretion involved in cellular response to glucose stimulus	1/62	54/17913	0.170976	0.290941	0.219677	PIM3	1	T1
GO:0001885	endothelial cell development	1/62	55/17913	0.173854	0.293556	0.221652	EZR	1	T1
GO:0002066	columnar/cuboidal epithelial cell development	1/62	55/17913	0.173854	0.293556	0.221652	CDKN1A	1	T1
GO:0006120	mitochondrial electron transport, NADH to ubiquinone	1/62	55/17913	0.173854	0.293556	0.221652	NDUFV2	1	T1
GO:0010332	response to gamma radiation	1/62	55/17913	0.173854	0.293556	0.221652	CDKN1A	1	T1
GO:0048008	platelet-derived growth factor receptor signaling pathway	1/62	55/17913	0.173854	0.293556	0.221652	ARID5B	1	T1
GO:0098586	cellular response to virus	1/62	55/17913	0.173854	0.293556	0.221652	BIRC3	1	T1
GO:0006826	iron ion transport	1/62	56/17913	0.176722	0.29671	0.224033	FTH1	1	T1
GO:0006977	DNA damage response, signal transduction by p53 class mediator resulting in cell cycle arrest	1/62	56/17913	0.176722	0.29671	0.224033	CDKN1A	1	T1
GO:0014888	striated muscle adaptation	1/62	56/17913	0.176722	0.29671	0.224033	LMNA	1	T1
GO:0033619	membrane protein proteolysis	1/62	56/17913	0.176722	0.29671	0.224033	TIMP1	1	T1
GO:0001836	release of cytochrome c from mitochondria	1/62	57/17913	0.17958	0.299187	0.225903	LMNA	1	T1
GO:0006879	cellular iron ion homeostasis	1/62	57/17913	0.17958	0.299187	0.225903	FTH1	1	T1
GO:0032890	regulation of organic acid transport	1/62	57/17913	0.17958	0.299187	0.225903	IRS2	1	T1
GO:0045604	regulation of epidermal cell differentiation	1/62	57/17913	0.17958	0.299187	0.225903	AQP3	1	T1
GO:0046686	response to cadmium ion	1/62	57/17913	0.17958	0.299187	0.225903	FOS	1	T1
GO:0072431	signal transduction involved in mitotic G1 DNA damage checkpoint	1/62	57/17913	0.17958	0.299187	0.225903	CDKN1A	1	T1
GO:1902400	intracellular signal transduction involved in G1 DNA damage checkpoint	1/62	57/17913	0.17958	0.299187	0.225903	CDKN1A	1	T1
GO:0030521	androgen receptor signaling pathway	1/62	58/17913	0.182429	0.302493	0.2284	FOXP1	1	T1
GO:0032233	positive regulation of actin filament bundle assembly	1/62	58/17913	0.182429	0.302493	0.2284	S100A10	1	T1
GO:0051057	positive regulation of small GTPase mediated signal transduction	1/62	58/17913	0.182429	0.302493	0.2284	IRS2	1	T1
GO:0045123	cellular extravasation	1/62	59/17913	0.185268	0.304891	0.23021	ITGB1	1	T1
GO:0072413	signal transduction involved in mitotic cell cycle checkpoint	1/62	59/17913	0.185268	0.304891	0.23021	CDKN1A	1	T1
GO:0090303	positive regulation of wound healing	1/62	59/17913	0.185268	0.304891	0.23021	ANXA1	1	T1
GO:0090342	regulation of cell aging	1/62	59/17913	0.185268	0.304891	0.23021	LMNA	1	T1
GO:1902402	signal transduction involved in mitotic DNA damage checkpoint	1/62	59/17913	0.185268	0.304891	0.23021	CDKN1A	1	T1
GO:1902403	signal transduction involved in mitotic DNA integrity checkpoint	1/62	59/17913	0.185268	0.304891	0.23021	CDKN1A	1	T1
GO:2000351	regulation of endothelial cell apoptotic process	1/62	59/17913	0.185268	0.304891	0.23021	CD40LG	1	T1
GO:0010676	positive regulation of cellular carbohydrate metabolic process	1/62	60/17913	0.188097	0.307237	0.231982	IRS2	1	T1
GO:0030593	neutrophil chemotaxis	1/62	60/17913	0.188097	0.307237	0.231982	CCR7	1	T1
GO:0046324	regulation of glucose import	1/62	60/17913	0.188097	0.307237	0.231982	IRS2	1	T1
GO:1905953	negative regulation of lipid localization	1/62	60/17913	0.188097	0.307237	0.231982	IRS2	1	T1
GO:2000401	regulation of lymphocyte migration	1/62	60/17913	0.188097	0.307237	0.231982	CCR6	1	T1
GO:0002709	regulation of T cell mediated immunity	1/62	61/17913	0.190917	0.308106	0.232638	IL7R	1	T1
GO:0002753	cytoplasmic pattern recognition receptor signaling pathway	1/62	61/17913	0.190917	0.308106	0.232638	BIRC3	1	T1
GO:0008088	axo-dendritic transport	1/62	61/17913	0.190917	0.308106	0.232638	AP3M2	1	T1
GO:0030032	lamellipodium assembly	1/62	61/17913	0.190917	0.308106	0.232638	ITGB1	1	T1
GO:0032922	circadian regulation of gene expression	1/62	61/17913	0.190917	0.308106	0.232638	PPP1CB	1	T1
GO:0033627	cell adhesion mediated by integrin	1/62	61/17913	0.190917	0.308106	0.232638	ITGB1	1	T1
GO:0035773	insulin secretion involved in cellular response to glucose stimulus	1/62	61/17913	0.190917	0.308106	0.232638	PIM3	1	T1
GO:0046888	negative regulation of hormone secretion	1/62	61/17913	0.190917	0.308106	0.232638	PIM3	1	T1
GO:0051893	regulation of focal adhesion assembly	1/62	61/17913	0.190917	0.308106	0.232638	S100A10	1	T1
GO:0090109	regulation of cell-substrate junction assembly	1/62	61/17913	0.190917	0.308106	0.232638	S100A10	1	T1
GO:0032729	positive regulation of interferon-gamma production	1/62	62/17913	0.193727	0.311207	0.234979	CD2	1	T1
GO:0030101	natural killer cell activation	1/62	63/17913	0.196527	0.313405	0.236639	CD2	1	T1
GO:0031571	mitotic G1 DNA damage checkpoint	1/62	63/17913	0.196527	0.313405	0.236639	CDKN1A	1	T1
GO:0035914	skeletal muscle cell differentiation	1/62	63/17913	0.196527	0.313405	0.236639	FOS	1	T1
GO:0036498	IRE1-mediated unfolded protein response	1/62	63/17913	0.196527	0.313405	0.236639	LMNA	1	T1
GO:0044819	mitotic G1/S transition checkpoint	1/62	63/17913	0.196527	0.313405	0.236639	CDKN1A	1	T1
GO:0001910	regulation of leukocyte mediated cytotoxicity	1/62	64/17913	0.199318	0.313854	0.236978	IL7R	1	T1
GO:0010257	NADH dehydrogenase complex assembly	1/62	64/17913	0.199318	0.313854	0.236978	NDUFV2	1	T1
GO:0015909	long-chain fatty acid transport	1/62	64/17913	0.199318	0.313854	0.236978	IRS2	1	T1
GO:0031060	regulation of histone methylation	1/62	64/17913	0.199318	0.313854	0.236978	LMNA	1	T1
GO:0032981	mitochondrial respiratory chain complex I assembly	1/62	64/17913	0.199318	0.313854	0.236978	NDUFV2	1	T1
GO:0044783	G1 DNA damage checkpoint	1/62	64/17913	0.199318	0.313854	0.236978	CDKN1A	1	T1
GO:0045670	regulation of osteoclast differentiation	1/62	64/17913	0.199318	0.313854	0.236978	FOS	1	T1
GO:0060135	maternal process involved in female pregnancy	1/62	64/17913	0.199318	0.313854	0.236978	JUNB	1	T1
GO:0071230	cellular response to amino acid stimulus	1/62	64/17913	0.199318	0.313854	0.236978	SOCS1	1	T1
GO:0035924	cellular response to vascular endothelial growth factor stimulus	1/62	65/17913	0.202099	0.317377	0.239638	ANXA1	1	T1
GO:0072577	endothelial cell apoptotic process	1/62	65/17913	0.202099	0.317377	0.239638	CD40LG	1	T1
GO:0006635	fatty acid beta-oxidation	1/62	66/17913	0.204871	0.32058	0.242056	IRS2	1	T1
GO:0006906	vesicle fusion	1/62	66/17913	0.204871	0.32058	0.242056	ANXA1	1	T1
GO:1903672	positive regulation of sprouting angiogenesis	1/62	66/17913	0.204871	0.32058	0.242056	ANXA1	1	T1
GO:0010812	negative regulation of cell-substrate adhesion	1/62	67/17913	0.207633	0.321739	0.242932	LGALS1	1	T1
GO:0040014	regulation of multicellular organism growth	1/62	67/17913	0.207633	0.321739	0.242932	EZR	1	T1
GO:0042531	positive regulation of tyrosine phosphorylation of STAT protein	1/62	67/17913	0.207633	0.321739	0.242932	SOCS3	1	T1
GO:1903391	regulation of adherens junction organization	1/62	67/17913	0.207633	0.321739	0.242932	S100A10	1	T1
GO:0002088	lens development in camera-type eye	1/62	68/17913	0.210386	0.323998	0.244637	VIM	1	T1
GO:0032024	positive regulation of insulin secretion	1/62	68/17913	0.210386	0.323998	0.244637	IRS2	1	T1
GO:0046323	glucose import	1/62	68/17913	0.210386	0.323998	0.244637	IRS2	1	T1
GO:0050891	multicellular organismal water homeostasis	1/62	68/17913	0.210386	0.323998	0.244637	AQP3	1	T1
GO:0061515	myeloid cell development	1/62	68/17913	0.210386	0.323998	0.244637	FOXP1	1	T1
GO:0071674	mononuclear cell migration	1/62	68/17913	0.210386	0.323998	0.244637	ANXA1	1	T1
GO:0009988	cell-cell recognition	1/62	69/17913	0.213129	0.326786	0.246742	CCR7	1	T1
GO:0048662	negative regulation of smooth muscle cell proliferation	1/62	69/17913	0.213129	0.326786	0.246742	CDKN1A	1	T1
GO:0071479	cellular response to ionizing radiation	1/62	69/17913	0.213129	0.326786	0.246742	CDKN1A	1	T1
GO:0090502	RNA phosphodiester bond hydrolysis, endonucleolytic	1/62	70/17913	0.215863	0.330688	0.249689	RNASET2	1	T1
GO:0000288	nuclear-transcribed mRNA catabolic process, deadenylation-dependent decay	1/62	71/17913	0.218588	0.33167	0.25043	ZFP36L2	1	T1
GO:0001707	mesoderm formation	1/62	71/17913	0.218588	0.33167	0.25043	ITGB1	1	T1
GO:0006305	DNA alkylation	1/62	71/17913	0.218588	0.33167	0.25043	FOS	1	T1
GO:0006306	DNA methylation	1/62	71/17913	0.218588	0.33167	0.25043	FOS	1	T1
GO:0034121	regulation of toll-like receptor signaling pathway	1/62	71/17913	0.218588	0.33167	0.25043	BIRC3	1	T1
GO:0043407	negative regulation of MAP kinase activity	1/62	71/17913	0.218588	0.33167	0.25043	DUSP4	1	T1
GO:0043507	positive regulation of JUN kinase activity	1/62	71/17913	0.218588	0.33167	0.25043	CD40LG	1	T1
GO:0090174	organelle membrane fusion	1/62	71/17913	0.218588	0.33167	0.25043	ANXA1	1	T1
GO:1903036	positive regulation of response to wounding	1/62	71/17913	0.218588	0.33167	0.25043	ANXA1	1	T1
GO:0050829	defense response to Gram-negative bacterium	1/62	72/17913	0.221303	0.33492	0.252884	CD4	1	T1
GO:1990266	neutrophil migration	1/62	72/17913	0.221303	0.33492	0.252884	CCR7	1	T1
GO:0008652	cellular amino acid biosynthetic process	1/62	73/17913	0.224009	0.336687	0.254218	SERINC5	1	T1
GO:0048332	mesoderm morphogenesis	1/62	73/17913	0.224009	0.336687	0.254218	ITGB1	1	T1
GO:0050688	regulation of defense response to virus	1/62	73/17913	0.224009	0.336687	0.254218	BIRC3	1	T1
GO:0061045	negative regulation of wound healing	1/62	73/17913	0.224009	0.336687	0.254218	CDKN1A	1	T1
GO:0072384	organelle transport along microtubule	1/62	73/17913	0.224009	0.336687	0.254218	AP3M2	1	T1
GO:0072401	signal transduction involved in DNA integrity checkpoint	1/62	73/17913	0.224009	0.336687	0.254218	CDKN1A	1	T1
GO:0072422	signal transduction involved in DNA damage checkpoint	1/62	73/17913	0.224009	0.336687	0.254218	CDKN1A	1	T1
GO:0030104	water homeostasis	1/62	74/17913	0.226706	0.339575	0.256398	AQP3	1	T1
GO:0042246	tissue regeneration	1/62	74/17913	0.226706	0.339575	0.256398	CDKN1A	1	T1
GO:0055072	iron ion homeostasis	1/62	74/17913	0.226706	0.339575	0.256398	FTH1	1	T1
GO:0072395	signal transduction involved in cell cycle checkpoint	1/62	74/17913	0.226706	0.339575	0.256398	CDKN1A	1	T1
GO:0006110	regulation of glycolytic process	1/62	75/17913	0.229394	0.342137	0.258333	DDIT4	1	T1
GO:0006919	activation of cysteine-type endopeptidase activity involved in apoptotic process	1/62	75/17913	0.229394	0.342137	0.258333	TRADD	1	T1
GO:0031100	animal organ regeneration	1/62	75/17913	0.229394	0.342137	0.258333	CDKN1A	1	T1
GO:0048678	response to axon injury	1/62	75/17913	0.229394	0.342137	0.258333	LGALS1	1	T1
GO:1901224	positive regulation of NIK/NF-kappaB signaling	1/62	75/17913	0.229394	0.342137	0.258333	TRADD	1	T1
GO:0010611	regulation of cardiac muscle hypertrophy	1/62	76/17913	0.232072	0.344664	0.260241	LMNA	1	T1
GO:0030317	flagellated sperm motility	1/62	77/17913	0.234741	0.34657	0.26168	CCR6	1	T1
GO:0030811	regulation of nucleotide catabolic process	1/62	77/17913	0.234741	0.34657	0.26168	DDIT4	1	T1
GO:0034109	homotypic cell-cell adhesion	1/62	77/17913	0.234741	0.34657	0.26168	LGALS1	1	T1
GO:0034644	cellular response to UV	1/62	77/17913	0.234741	0.34657	0.26168	CDKN1A	1	T1
GO:0048708	astrocyte differentiation	1/62	77/17913	0.234741	0.34657	0.26168	VIM	1	T1
GO:0090398	cellular senescence	1/62	77/17913	0.234741	0.34657	0.26168	CDKN1A	1	T1
GO:0097722	sperm motility	1/62	77/17913	0.234741	0.34657	0.26168	CCR6	1	T1
GO:0001570	vasculogenesis	1/62	78/17913	0.237402	0.348149	0.262873	JUNB	1	T1
GO:0010827	regulation of glucose transmembrane transport	1/62	78/17913	0.237402	0.348149	0.262873	IRS2	1	T1
GO:0022617	extracellular matrix disassembly	1/62	78/17913	0.237402	0.348149	0.262873	TIMP1	1	T1
GO:0032760	positive regulation of tumor necrosis factor production	1/62	78/17913	0.237402	0.348149	0.262873	CD2	1	T1
GO:0033143	regulation of intracellular steroid hormone receptor signaling pathway	1/62	78/17913	0.237402	0.348149	0.262873	FOXP1	1	T1
GO:0045913	positive regulation of carbohydrate metabolic process	1/62	78/17913	0.237402	0.348149	0.262873	IRS2	1	T1
GO:0055013	cardiac muscle cell development	1/62	78/17913	0.237402	0.348149	0.262873	LMNA	1	T1
GO:0001708	cell fate specification	1/62	79/17913	0.240053	0.349694	0.264039	ITGB1	1	T1
GO:0006029	proteoglycan metabolic process	1/62	79/17913	0.240053	0.349694	0.264039	SPOCK2	1	T1
GO:0014743	regulation of muscle hypertrophy	1/62	79/17913	0.240053	0.349694	0.264039	LMNA	1	T1
GO:0097581	lamellipodium organization	1/62	79/17913	0.240053	0.349694	0.264039	ITGB1	1	T1
GO:2001021	negative regulation of response to DNA damage stimulus	1/62	79/17913	0.240053	0.349694	0.264039	TPT1	1	T1
GO:0043536	positive regulation of blood vessel endothelial cell migration	1/62	80/17913	0.242695	0.352662	0.26628	ANXA1	1	T1
GO:0002690	positive regulation of leukocyte chemotaxis	1/62	81/17913	0.245328	0.355015	0.268057	CCR7	1	T1
GO:0007045	cell-substrate adherens junction assembly	1/62	81/17913	0.245328	0.355015	0.268057	S100A10	1	T1
GO:0014068	positive regulation of phosphatidylinositol 3-kinase signaling	1/62	81/17913	0.245328	0.355015	0.268057	IRS2	1	T1
GO:0048041	focal adhesion assembly	1/62	81/17913	0.245328	0.355015	0.268057	S100A10	1	T1
GO:1903557	positive regulation of tumor necrosis factor superfamily cytokine production	1/62	81/17913	0.245328	0.355015	0.268057	CD2	1	T1
GO:0031341	regulation of cell killing	1/62	82/17913	0.247951	0.357336	0.269809	IL7R	1	T1
GO:0045445	myoblast differentiation	1/62	82/17913	0.247951	0.357336	0.269809	LGALS1	1	T1
GO:0048644	muscle organ morphogenesis	1/62	82/17913	0.247951	0.357336	0.269809	ARID5B	1	T1
GO:0071158	positive regulation of cell cycle arrest	1/62	82/17913	0.247951	0.357336	0.269809	CDKN1A	1	T1
GO:0000079	regulation of cyclin-dependent protein serine/threonine kinase activity	1/62	83/17913	0.250566	0.359624	0.271537	CDKN1A	1	T1
GO:0046916	cellular transition metal ion homeostasis	1/62	83/17913	0.250566	0.359624	0.271537	FTH1	1	T1
GO:0051492	regulation of stress fiber assembly	1/62	83/17913	0.250566	0.359624	0.271537	S100A10	1	T1
GO:0060218	hematopoietic stem cell differentiation	1/62	83/17913	0.250566	0.359624	0.271537	BATF	1	T1
GO:0000018	regulation of DNA recombination	1/62	84/17913	0.253172	0.361586	0.273018	IL7R	1	T1
GO:0006767	water-soluble vitamin metabolic process	1/62	84/17913	0.253172	0.361586	0.273018	SLC2A3	1	T1
GO:0030838	positive regulation of actin filament polymerization	1/62	84/17913	0.253172	0.361586	0.273018	CCR7	1	T1
GO:0055006	cardiac cell development	1/62	84/17913	0.253172	0.361586	0.273018	LMNA	1	T1
GO:1901019	regulation of calcium ion transmembrane transporter activity	1/62	84/17913	0.253172	0.361586	0.273018	AHNAK	1	T1
GO:0001942	hair follicle development	1/62	85/17913	0.255769	0.364108	0.274922	TRADD	1	T1
GO:0043506	regulation of JUN kinase activity	1/62	85/17913	0.255769	0.364108	0.274922	CD40LG	1	T1
GO:0070542	response to fatty acid	1/62	85/17913	0.255769	0.364108	0.274922	CCR7	1	T1
GO:0090049	regulation of cell migration involved in sprouting angiogenesis	1/62	85/17913	0.255769	0.364108	0.274922	ANXA1	1	T1
GO:0032602	chemokine production	1/62	86/17913	0.258358	0.366897	0.277028	FOXP1	1	T1
GO:0034446	substrate adhesion-dependent cell spreading	1/62	86/17913	0.258358	0.366897	0.277028	S100A10	1	T1
GO:0044773	mitotic DNA damage checkpoint	1/62	86/17913	0.258358	0.366897	0.277028	CDKN1A	1	T1
GO:0022404	molting cycle process	1/62	87/17913	0.260937	0.367875	0.277767	TRADD	1	T1
GO:0022405	hair cycle process	1/62	87/17913	0.260937	0.367875	0.277767	TRADD	1	T1
GO:0033108	mitochondrial respiratory chain complex assembly	1/62	87/17913	0.260937	0.367875	0.277767	NDUFV2	1	T1
GO:0060021	roof of mouth development	1/62	87/17913	0.260937	0.367875	0.277767	ARID5B	1	T1
GO:0098773	skin epidermis development	1/62	87/17913	0.260937	0.367875	0.277767	TRADD	1	T1
GO:1903035	negative regulation of response to wounding	1/62	87/17913	0.260937	0.367875	0.277767	CDKN1A	1	T1
GO:1904029	regulation of cyclin-dependent protein kinase activity	1/62	87/17913	0.260937	0.367875	0.277767	CDKN1A	1	T1
GO:0002456	T cell mediated immunity	1/62	88/17913	0.263508	0.368532	0.278263	IL7R	1	T1
GO:0009791	post-embryonic development	1/62	88/17913	0.263508	0.368532	0.278263	ARID5B	1	T1
GO:0031058	positive regulation of histone modification	1/62	88/17913	0.263508	0.368532	0.278263	LMNA	1	T1
GO:1904035	regulation of epithelial cell apoptotic process	1/62	88/17913	0.263508	0.368532	0.278263	CD40LG	1	T1
GO:1904705	regulation of vascular smooth muscle cell proliferation	1/62	88/17913	0.263508	0.368532	0.278263	CDKN1A	1	T1
GO:1990874	vascular smooth muscle cell proliferation	1/62	88/17913	0.263508	0.368532	0.278263	CDKN1A	1	T1
GO:0042775	mitochondrial ATP synthesis coupled electron transport	1/62	89/17913	0.266069	0.370929	0.280073	NDUFV2	1	T1
GO:0044728	DNA methylation or demethylation	1/62	89/17913	0.266069	0.370929	0.280073	FOS	1	T1
GO:0015908	fatty acid transport	1/62	90/17913	0.268622	0.372413	0.281193	IRS2	1	T1
GO:0034333	adherens junction assembly	1/62	90/17913	0.268622	0.372413	0.281193	S100A10	1	T1
GO:0042773	ATP synthesis coupled electron transport	1/62	90/17913	0.268622	0.372413	0.281193	NDUFV2	1	T1
GO:0044774	mitotic DNA integrity checkpoint	1/62	90/17913	0.268622	0.372413	0.281193	CDKN1A	1	T1
GO:0051196	regulation of coenzyme metabolic process	1/62	90/17913	0.268622	0.372413	0.281193	DDIT4	1	T1
GO:1901888	regulation of cell junction assembly	1/62	90/17913	0.268622	0.372413	0.281193	S100A10	1	T1
GO:2001169	regulation of ATP biosynthetic process	1/62	90/17913	0.268622	0.372413	0.281193	DDIT4	1	T1
GO:0000041	transition metal ion transport	1/62	91/17913	0.271166	0.374458	0.282737	FTH1	1	T1
GO:0006900	vesicle budding from membrane	1/62	91/17913	0.271166	0.374458	0.282737	S100A10	1	T1
GO:0010927	cellular component assembly involved in morphogenesis	1/62	91/17913	0.271166	0.374458	0.282737	ITGB1	1	T1
GO:0090277	positive regulation of peptide hormone secretion	1/62	91/17913	0.271166	0.374458	0.282737	IRS2	1	T1
GO:0002702	positive regulation of production of molecular mediator of immune response	1/62	93/17913	0.276229	0.37995	0.286884	TNFRSF4	1	T1
GO:0019395	fatty acid oxidation	1/62	93/17913	0.276229	0.37995	0.286884	IRS2	1	T1
GO:0044070	regulation of anion transport	1/62	93/17913	0.276229	0.37995	0.286884	IRS2	1	T1
GO:0009062	fatty acid catabolic process	1/62	94/17913	0.278747	0.381317	0.287916	IRS2	1	T1
GO:0022600	digestive system process	1/62	94/17913	0.278747	0.381317	0.287916	EZR	1	T1
GO:0032231	regulation of actin filament bundle assembly	1/62	94/17913	0.278747	0.381317	0.287916	S100A10	1	T1
GO:0048284	organelle fusion	1/62	94/17913	0.278747	0.381317	0.287916	ANXA1	1	T1
GO:0048640	negative regulation of developmental growth	1/62	94/17913	0.278747	0.381317	0.287916	CDKN1A	1	T1
GO:0110020	regulation of actomyosin structure organization	1/62	94/17913	0.278747	0.381317	0.287916	S100A10	1	T1
GO:2001243	negative regulation of intrinsic apoptotic signaling pathway	1/62	94/17913	0.278747	0.381317	0.287916	TPT1	1	T1
GO:0008585	female gonad development	1/62	95/17913	0.281256	0.382955	0.289153	ARID5B	1	T1
GO:0019217	regulation of fatty acid metabolic process	1/62	95/17913	0.281256	0.382955	0.289153	IRS2	1	T1
GO:0034440	lipid oxidation	1/62	95/17913	0.281256	0.382955	0.289153	IRS2	1	T1
GO:0120034	positive regulation of plasma membrane bounded cell projection assembly	1/62	95/17913	0.281256	0.382955	0.289153	CCR7	1	T1
GO:0007044	cell-substrate junction assembly	1/62	96/17913	0.283757	0.385461	0.291045	S100A10	1	T1
GO:0042116	macrophage activation	1/62	96/17913	0.283757	0.385461	0.291045	FOXP1	1	T1
GO:0001909	leukocyte mediated cytotoxicity	1/62	97/17913	0.28625	0.387045	0.292241	IL7R	1	T1
GO:0030038	contractile actin filament bundle assembly	1/62	97/17913	0.28625	0.387045	0.292241	S100A10	1	T1
GO:0034766	negative regulation of ion transmembrane transport	1/62	97/17913	0.28625	0.387045	0.292241	IRS2	1	T1
GO:0043149	stress fiber assembly	1/62	97/17913	0.28625	0.387045	0.292241	S100A10	1	T1
GO:1902882	regulation of response to oxidative stress	1/62	97/17913	0.28625	0.387045	0.292241	SESN3	1	T1
GO:0007631	feeding behavior	1/62	98/17913	0.288734	0.388928	0.293663	FOS	1	T1
GO:0010522	regulation of calcium ion transport into cytosol	1/62	98/17913	0.288734	0.388928	0.293663	CD4	1	T1
GO:0050848	regulation of calcium-mediated signaling	1/62	98/17913	0.288734	0.388928	0.293663	CD4	1	T1
GO:0001824	blastocyst development	1/62	99/17913	0.291209	0.391935	0.295933	JUNB	1	T1
GO:0046545	development of primary female sexual characteristics	1/62	100/17913	0.293676	0.394951	0.298211	ARID5B	1	T1
GO:0018107	peptidyl-threonine phosphorylation	1/62	101/17913	0.296134	0.395825	0.298871	DDIT4	1	T1
GO:0035335	peptidyl-tyrosine dephosphorylation	1/62	101/17913	0.296134	0.395825	0.298871	DUSP4	1	T1
GO:0048661	positive regulation of smooth muscle cell proliferation	1/62	101/17913	0.296134	0.395825	0.298871	FOXP1	1	T1
GO:0048675	axon extension	1/62	101/17913	0.296134	0.395825	0.298871	ITGB1	1	T1
GO:1905269	positive regulation of chromatin organization	1/62	101/17913	0.296134	0.395825	0.298871	LMNA	1	T1
GO:2000379	positive regulation of reactive oxygen species metabolic process	1/62	101/17913	0.296134	0.395825	0.298871	CDKN1A	1	T1
GO:0006275	regulation of DNA replication	1/62	102/17913	0.298584	0.398188	0.300655	S100A11	1	T1
GO:0006614	SRP-dependent cotranslational protein targeting to membrane	1/62	103/17913	0.301026	0.399921	0.301964	RPLP0	1	T1
GO:0032526	response to retinoic acid	1/62	103/17913	0.301026	0.399921	0.301964	AQP3	1	T1
GO:0002688	regulation of leukocyte chemotaxis	1/62	105/17913	0.305884	0.404229	0.305216	CCR7	1	T1
GO:0045446	endothelial cell differentiation	1/62	105/17913	0.305884	0.404229	0.305216	EZR	1	T1
GO:0055076	transition metal ion homeostasis	1/62	105/17913	0.305884	0.404229	0.305216	FTH1	1	T1
GO:0002065	columnar/cuboidal epithelial cell differentiation	1/62	106/17913	0.308301	0.404977	0.305781	CDKN1A	1	T1
GO:0006613	cotranslational protein targeting to membrane	1/62	106/17913	0.308301	0.404977	0.305781	RPLP0	1	T1
GO:0022904	respiratory electron transport chain	1/62	106/17913	0.308301	0.404977	0.305781	NDUFV2	1	T1
GO:0043200	response to amino acid	1/62	106/17913	0.308301	0.404977	0.305781	SOCS1	1	T1
GO:0043502	regulation of muscle adaptation	1/62	106/17913	0.308301	0.404977	0.305781	LMNA	1	T1
GO:2000278	regulation of DNA biosynthetic process	1/62	106/17913	0.308301	0.404977	0.305781	CDKN1A	1	T1
GO:0062014	negative regulation of small molecule metabolic process	1/62	107/17913	0.310709	0.407224	0.307478	DDIT4	1	T1
GO:0003300	cardiac muscle hypertrophy	1/62	108/17913	0.313109	0.409145	0.308928	LMNA	1	T1
GO:0045047	protein targeting to ER	1/62	108/17913	0.313109	0.409145	0.308928	RPLP0	1	T1
GO:0071156	regulation of cell cycle arrest	1/62	108/17913	0.313109	0.409145	0.308928	CDKN1A	1	T1
GO:0018210	peptidyl-threonine modification	1/62	109/17913	0.315501	0.410738	0.310131	DDIT4	1	T1
GO:0034968	histone lysine methylation	1/62	109/17913	0.315501	0.410738	0.310131	LMNA	1	T1
GO:0042303	molting cycle	1/62	109/17913	0.315501	0.410738	0.310131	TRADD	1	T1
GO:0042633	hair cycle	1/62	109/17913	0.315501	0.410738	0.310131	TRADD	1	T1
GO:1900371	regulation of purine nucleotide biosynthetic process	1/62	109/17913	0.315501	0.410738	0.310131	DDIT4	1	T1
GO:0006096	glycolytic process	1/62	110/17913	0.317885	0.412614	0.311547	DDIT4	1	T1
GO:0030808	regulation of nucleotide biosynthetic process	1/62	110/17913	0.317885	0.412614	0.311547	DDIT4	1	T1
GO:0031398	positive regulation of protein ubiquitination	1/62	110/17913	0.317885	0.412614	0.311547	BIRC3	1	T1
GO:1903578	regulation of ATP metabolic process	1/62	110/17913	0.317885	0.412614	0.311547	DDIT4	1	T1
GO:0006757	ATP generation from ADP	1/62	111/17913	0.32026	0.414162	0.312716	DDIT4	1	T1
GO:0014897	striated muscle hypertrophy	1/62	111/17913	0.32026	0.414162	0.312716	LMNA	1	T1
GO:0021782	glial cell development	1/62	111/17913	0.32026	0.414162	0.312716	VIM	1	T1
GO:1904019	epithelial cell apoptotic process	1/62	111/17913	0.32026	0.414162	0.312716	CD40LG	1	T1
GO:0030968	endoplasmic reticulum unfolded protein response	1/62	112/17913	0.322628	0.415689	0.313869	LMNA	1	T1
GO:0051209	release of sequestered calcium ion into cytosol	1/62	112/17913	0.322628	0.415689	0.313869	CCR7	1	T1
GO:0051283	negative regulation of sequestering of calcium ion	1/62	112/17913	0.322628	0.415689	0.313869	CCR7	1	T1
GO:0072599	establishment of protein localization to endoplasmic reticulum	1/62	112/17913	0.322628	0.415689	0.313869	RPLP0	1	T1
GO:1903510	mucopolysaccharide metabolic process	1/62	112/17913	0.322628	0.415689	0.313869	SPOCK2	1	T1
GO:0014896	muscle hypertrophy	1/62	113/17913	0.324987	0.416583	0.314544	LMNA	1	T1
GO:0043666	regulation of phosphoprotein phosphatase activity	1/62	113/17913	0.324987	0.416583	0.314544	RCAN3	1	T1
GO:0051817	modification of morphology or physiology of other organism involved in symbiotic interaction	1/62	113/17913	0.324987	0.416583	0.314544	CD4	1	T1
GO:0071482	cellular response to light stimulus	1/62	113/17913	0.324987	0.416583	0.314544	CDKN1A	1	T1
GO:1903825	organic acid transmembrane transport	1/62	113/17913	0.324987	0.416583	0.314544	IRS2	1	T1
GO:1905039	carboxylic acid transmembrane transport	1/62	113/17913	0.324987	0.416583	0.314544	IRS2	1	T1
GO:0006304	DNA modification	1/62	114/17913	0.327338	0.417154	0.314975	FOS	1	T1
GO:0042752	regulation of circadian rhythm	1/62	114/17913	0.327338	0.417154	0.314975	PPP1CB	1	T1
GO:0042866	pyruvate biosynthetic process	1/62	114/17913	0.327338	0.417154	0.314975	DDIT4	1	T1
GO:0046660	female sex differentiation	1/62	114/17913	0.327338	0.417154	0.314975	ARID5B	1	T1
GO:0051193	regulation of cofactor metabolic process	1/62	114/17913	0.327338	0.417154	0.314975	DDIT4	1	T1
GO:0051282	regulation of sequestering of calcium ion	1/62	114/17913	0.327338	0.417154	0.314975	CCR7	1	T1
GO:1901222	regulation of NIK/NF-kappaB signaling	1/62	114/17913	0.327338	0.417154	0.314975	TRADD	1	T1
GO:0043484	regulation of RNA splicing	1/62	115/17913	0.329681	0.419224	0.316538	AHNAK	1	T1
GO:0070252	actin-mediated cell contraction	1/62	115/17913	0.329681	0.419224	0.316538	VIM	1	T1
GO:0072329	monocarboxylic acid catabolic process	1/62	115/17913	0.329681	0.419224	0.316538	IRS2	1	T1
GO:0032273	positive regulation of protein polymerization	1/62	116/17913	0.332016	0.421276	0.318087	CCR7	1	T1
GO:2000736	regulation of stem cell differentiation	1/62	116/17913	0.332016	0.421276	0.318087	ZFP36L2	1	T1
GO:0001704	formation of primary germ layer	1/62	117/17913	0.334343	0.422087	0.3187	ITGB1	1	T1
GO:0014066	regulation of phosphatidylinositol 3-kinase signaling	1/62	117/17913	0.334343	0.422087	0.3187	IRS2	1	T1
GO:0034605	cellular response to heat	1/62	117/17913	0.334343	0.422087	0.3187	CDKN1A	1	T1
GO:0045727	positive regulation of translation	1/62	117/17913	0.334343	0.422087	0.3187	VIM	1	T1
GO:0051208	sequestering of calcium ion	1/62	117/17913	0.334343	0.422087	0.3187	CCR7	1	T1
GO:1900180	regulation of protein localization to nucleus	1/62	117/17913	0.334343	0.422087	0.3187	LMNA	1	T1
GO:0000184	nuclear-transcribed mRNA catabolic process, nonsense-mediated decay	1/62	118/17913	0.336662	0.423793	0.319988	RPLP0	1	T1
GO:0006997	nucleus organization	1/62	118/17913	0.336662	0.423793	0.319988	LMNA	1	T1
GO:0043280	positive regulation of cysteine-type endopeptidase activity involved in apoptotic process	1/62	118/17913	0.336662	0.423793	0.319988	TRADD	1	T1
GO:0008637	apoptotic mitochondrial changes	1/62	119/17913	0.338974	0.425174	0.321031	LMNA	1	T1
GO:0033135	regulation of peptidyl-serine phosphorylation	1/62	119/17913	0.338974	0.425174	0.321031	DDIT4	1	T1
GO:0051928	positive regulation of calcium ion transport	1/62	119/17913	0.338974	0.425174	0.321031	CD4	1	T1
GO:0003014	renal system process	1/62	120/17913	0.341277	0.42745	0.32275	AQP3	1	T1
GO:0002687	positive regulation of leukocyte migration	1/62	121/17913	0.343572	0.429404	0.324224	CCR7	1	T1
GO:0043500	muscle adaptation	1/62	121/17913	0.343572	0.429404	0.324224	LMNA	1	T1
GO:0046031	ADP metabolic process	1/62	121/17913	0.343572	0.429404	0.324224	DDIT4	1	T1
GO:0018022	peptidyl-lysine methylation	1/62	122/17913	0.34586	0.431032	0.325454	LMNA	1	T1
GO:0032368	regulation of lipid transport	1/62	122/17913	0.34586	0.431032	0.325454	IRS2	1	T1
GO:0034763	negative regulation of transmembrane transport	1/62	122/17913	0.34586	0.431032	0.325454	IRS2	1	T1
GO:0035270	endocrine system development	1/62	122/17913	0.34586	0.431032	0.325454	ARID5B	1	T1
GO:0034620	cellular response to unfolded protein	1/62	123/17913	0.348139	0.433256	0.327133	LMNA	1	T1
GO:0035023	regulation of Rho protein signal transduction	1/62	124/17913	0.350411	0.435156	0.328568	ITGB1	1	T1
GO:0042177	negative regulation of protein catabolic process	1/62	124/17913	0.350411	0.435156	0.328568	TIMP1	1	T1
GO:2000134	negative regulation of G1/S transition of mitotic cell cycle	1/62	124/17913	0.350411	0.435156	0.328568	CDKN1A	1	T1
GO:0046887	positive regulation of hormone secretion	1/62	125/17913	0.352675	0.437657	0.330456	IRS2	1	T1
GO:0030010	establishment of cell polarity	1/62	126/17913	0.354931	0.438592	0.331162	CCR7	1	T1
GO:0042476	odontogenesis	1/62	126/17913	0.354931	0.438592	0.331162	AQP3	1	T1
GO:0048489	synaptic vesicle transport	1/62	126/17913	0.354931	0.438592	0.331162	AP3M2	1	T1
GO:0097480	establishment of synaptic vesicle localization	1/62	126/17913	0.354931	0.438592	0.331162	AP3M2	1	T1
GO:0097553	calcium ion transmembrane import into cytosol	1/62	126/17913	0.354931	0.438592	0.331162	CCR7	1	T1
GO:0002576	platelet degranulation	1/62	128/17913	0.359421	0.441956	0.333702	TIMP1	1	T1
GO:0007498	mesoderm development	1/62	128/17913	0.359421	0.441956	0.333702	ITGB1	1	T1
GO:0014013	regulation of gliogenesis	1/62	128/17913	0.359421	0.441956	0.333702	GPR183	1	T1
GO:0032355	response to estradiol	1/62	128/17913	0.359421	0.441956	0.333702	CD4	1	T1
GO:0070972	protein localization to endoplasmic reticulum	1/62	128/17913	0.359421	0.441956	0.333702	RPLP0	1	T1
GO:1900542	regulation of purine nucleotide metabolic process	1/62	128/17913	0.359421	0.441956	0.333702	DDIT4	1	T1
GO:1903322	positive regulation of protein modification by small protein conjugation or removal	1/62	128/17913	0.359421	0.441956	0.333702	BIRC3	1	T1
GO:0006165	nucleoside diphosphate phosphorylation	1/62	129/17913	0.361654	0.443146	0.334601	DDIT4	1	T1
GO:0008037	cell recognition	1/62	129/17913	0.361654	0.443146	0.334601	CCR7	1	T1
GO:0030833	regulation of actin filament polymerization	1/62	129/17913	0.361654	0.443146	0.334601	CCR7	1	T1
GO:1903364	positive regulation of cellular protein catabolic process	1/62	129/17913	0.361654	0.443146	0.334601	EZR	1	T1
GO:0001889	liver development	1/62	130/17913	0.363879	0.443699	0.335018	ARID5B	1	T1
GO:0006766	vitamin metabolic process	1/62	130/17913	0.363879	0.443699	0.335018	SLC2A3	1	T1
GO:0007156	homophilic cell adhesion via plasma membrane adhesion molecules	1/62	130/17913	0.363879	0.443699	0.335018	ITGB1	1	T1
GO:0016571	histone methylation	1/62	130/17913	0.363879	0.443699	0.335018	LMNA	1	T1
GO:0050921	positive regulation of chemotaxis	1/62	130/17913	0.363879	0.443699	0.335018	CCR7	1	T1
GO:1902807	negative regulation of cell cycle G1/S phase transition	1/62	130/17913	0.363879	0.443699	0.335018	CDKN1A	1	T1
GO:0006119	oxidative phosphorylation	1/62	131/17913	0.366097	0.445041	0.336032	NDUFV2	1	T1
GO:0045598	regulation of fat cell differentiation	1/62	131/17913	0.366097	0.445041	0.336032	ZFP36L2	1	T1
GO:0046939	nucleotide phosphorylation	1/62	131/17913	0.366097	0.445041	0.336032	DDIT4	1	T1
GO:0048813	dendrite morphogenesis	1/62	131/17913	0.366097	0.445041	0.336032	ITGB1	1	T1
GO:0006140	regulation of nucleotide metabolic process	1/62	132/17913	0.368307	0.44507	0.336053	DDIT4	1	T1
GO:0007286	spermatid development	1/62	132/17913	0.368307	0.44507	0.336053	CCR6	1	T1
GO:0007586	digestion	1/62	132/17913	0.368307	0.44507	0.336053	EZR	1	T1
GO:0030048	actin filament-based movement	1/62	132/17913	0.368307	0.44507	0.336053	VIM	1	T1
GO:0048565	digestive tract development	1/62	132/17913	0.368307	0.44507	0.336053	CDKN1A	1	T1
GO:0050715	positive regulation of cytokine secretion	1/62	132/17913	0.368307	0.44507	0.336053	CD2	1	T1
GO:0055088	lipid homeostasis	1/62	132/17913	0.368307	0.44507	0.336053	IRS2	1	T1
GO:0090501	RNA phosphodiester bond hydrolysis	1/62	132/17913	0.368307	0.44507	0.336053	RNASET2	1	T1
GO:0000077	DNA damage checkpoint	1/62	133/17913	0.37051	0.446499	0.337132	CDKN1A	1	T1
GO:0009135	purine nucleoside diphosphate metabolic process	1/62	133/17913	0.37051	0.446499	0.337132	DDIT4	1	T1
GO:0009179	purine ribonucleoside diphosphate metabolic process	1/62	133/17913	0.37051	0.446499	0.337132	DDIT4	1	T1
GO:0061008	hepaticobiliary system development	1/62	133/17913	0.37051	0.446499	0.337132	ARID5B	1	T1
GO:0034332	adherens junction organization	1/62	134/17913	0.372705	0.448835	0.338896	S100A10	1	T1
GO:0002920	regulation of humoral immune response	1/62	135/17913	0.374892	0.449922	0.339717	CCR7	1	T1
GO:0009185	ribonucleoside diphosphate metabolic process	1/62	135/17913	0.374892	0.449922	0.339717	DDIT4	1	T1
GO:0035967	cellular response to topologically incorrect protein	1/62	135/17913	0.374892	0.449922	0.339717	LMNA	1	T1
GO:2000241	regulation of reproductive process	1/62	135/17913	0.374892	0.449922	0.339717	TIMP1	1	T1
GO:2001056	positive regulation of cysteine-type endopeptidase activity	1/62	135/17913	0.374892	0.449922	0.339717	TRADD	1	T1
GO:0002706	regulation of lymphocyte mediated immunity	1/62	136/17913	0.377072	0.452229	0.341459	IL7R	1	T1
GO:0008584	male gonad development	1/62	137/17913	0.379245	0.453282	0.342254	ARID5B	1	T1
GO:0009411	response to UV	1/62	137/17913	0.379245	0.453282	0.342254	CDKN1A	1	T1
GO:0015718	monocarboxylic acid transport	1/62	137/17913	0.379245	0.453282	0.342254	IRS2	1	T1
GO:0035304	regulation of protein dephosphorylation	1/62	137/17913	0.379245	0.453282	0.342254	RCAN3	1	T1
GO:0097479	synaptic vesicle localization	1/62	137/17913	0.379245	0.453282	0.342254	AP3M2	1	T1
GO:0010770	positive regulation of cell morphogenesis involved in differentiation	1/62	138/17913	0.38141	0.453702	0.342571	S100A10	1	T1
GO:0014065	phosphatidylinositol 3-kinase signaling	1/62	138/17913	0.38141	0.453702	0.342571	IRS2	1	T1
GO:0030879	mammary gland development	1/62	138/17913	0.38141	0.453702	0.342571	IRS2	1	T1
GO:0031056	regulation of histone modification	1/62	138/17913	0.38141	0.453702	0.342571	LMNA	1	T1
GO:0044344	cellular response to fibroblast growth factor stimulus	1/62	138/17913	0.38141	0.453702	0.342571	ZFP36L2	1	T1
GO:0046546	development of primary male sexual characteristics	1/62	138/17913	0.38141	0.453702	0.342571	ARID5B	1	T1
GO:0048515	spermatid differentiation	1/62	138/17913	0.38141	0.453702	0.342571	CCR6	1	T1
GO:0001837	epithelial to mesenchymal transition	1/62	140/17913	0.385718	0.457583	0.345501	S100A4	1	T1
GO:0016482	cytosolic transport	1/62	140/17913	0.385718	0.457583	0.345501	EZR	1	T1
GO:0034250	positive regulation of cellular amide metabolic process	1/62	140/17913	0.385718	0.457583	0.345501	VIM	1	T1
GO:0031570	DNA integrity checkpoint	1/62	141/17913	0.387861	0.459502	0.346951	CDKN1A	1	T1
GO:0051053	negative regulation of DNA metabolic process	1/62	141/17913	0.387861	0.459502	0.346951	S100A11	1	T1
GO:0019359	nicotinamide nucleotide biosynthetic process	1/62	142/17913	0.389996	0.461408	0.348389	DDIT4	1	T1
GO:0019363	pyridine nucleotide biosynthetic process	1/62	142/17913	0.389996	0.461408	0.348389	DDIT4	1	T1
GO:0010970	transport along microtubule	1/62	143/17913	0.392125	0.462364	0.349111	AP3M2	1	T1
GO:0055123	digestive system development	1/62	143/17913	0.392125	0.462364	0.349111	CDKN1A	1	T1
GO:0062013	positive regulation of small molecule metabolic process	1/62	143/17913	0.392125	0.462364	0.349111	IRS2	1	T1
GO:0099111	microtubule-based transport	1/62	143/17913	0.392125	0.462364	0.349111	AP3M2	1	T1
GO:1903670	regulation of sprouting angiogenesis	1/62	143/17913	0.392125	0.462364	0.349111	ANXA1	1	T1
GO:0006665	sphingolipid metabolic process	1/62	144/17913	0.394246	0.463616	0.350056	SERINC5	1	T1
GO:0010212	response to ionizing radiation	1/62	144/17913	0.394246	0.463616	0.350056	CDKN1A	1	T1
GO:0043271	negative regulation of ion transport	1/62	144/17913	0.394246	0.463616	0.350056	IRS2	1	T1
GO:1903169	regulation of calcium ion transmembrane transport	1/62	144/17913	0.394246	0.463616	0.350056	AHNAK	1	T1
GO:0002262	myeloid cell homeostasis	1/62	145/17913	0.396359	0.464853	0.35099	ANXA1	1	T1
GO:0030041	actin filament polymerization	1/62	145/17913	0.396359	0.464853	0.35099	CCR7	1	T1
GO:0071774	response to fibroblast growth factor	1/62	145/17913	0.396359	0.464853	0.35099	ZFP36L2	1	T1
GO:0072525	pyridine-containing compound biosynthetic process	1/62	145/17913	0.396359	0.464853	0.35099	DDIT4	1	T1
GO:0000187	activation of MAPK activity	1/62	147/17913	0.400565	0.468217	0.35353	CD40LG	1	T1
GO:0002224	toll-like receptor signaling pathway	1/62	147/17913	0.400565	0.468217	0.35353	BIRC3	1	T1
GO:0007051	spindle organization	1/62	147/17913	0.400565	0.468217	0.35353	EZR	1	T1
GO:0007093	mitotic cell cycle checkpoint	1/62	147/17913	0.400565	0.468217	0.35353	CDKN1A	1	T1
GO:0008064	regulation of actin polymerization or depolymerization	1/62	147/17913	0.400565	0.468217	0.35353	CCR7	1	T1
GO:0030832	regulation of actin filament length	1/62	148/17913	0.402657	0.470034	0.354903	CCR7	1	T1
GO:1990138	neuron projection extension	1/62	148/17913	0.402657	0.470034	0.354903	ITGB1	1	T1
GO:0006754	ATP biosynthetic process	1/62	150/17913	0.406819	0.473945	0.357856	DDIT4	1	T1
GO:0022406	membrane docking	1/62	150/17913	0.406819	0.473945	0.357856	EZR	1	T1
GO:0030902	hindbrain development	1/62	150/17913	0.406819	0.473945	0.357856	ITGB1	1	T1
GO:0030856	regulation of epithelial cell differentiation	1/62	151/17913	0.408889	0.475408	0.358961	AQP3	1	T1
GO:1905952	regulation of lipid localization	1/62	151/17913	0.408889	0.475408	0.358961	IRS2	1	T1
GO:0001764	neuron migration	1/62	152/17913	0.410953	0.477174	0.360294	DDIT4	1	T1
GO:0030168	platelet activation	1/62	152/17913	0.410953	0.477174	0.360294	CD40LG	1	T1
GO:0009132	nucleoside diphosphate metabolic process	1/62	153/17913	0.413009	0.479244	0.361856	DDIT4	1	T1
GO:0030705	cytoskeleton-dependent intracellular transport	1/62	154/17913	0.415058	0.481302	0.363411	AP3M2	1	T1
GO:0071695	anatomical structure maturation	1/62	155/17913	0.4171	0.48335	0.364957	CDKN1A	1	T1
GO:0001906	cell killing	1/62	156/17913	0.419135	0.485067	0.366253	IL7R	1	T1
GO:0007519	skeletal muscle tissue development	1/62	156/17913	0.419135	0.485067	0.366253	FOS	1	T1
GO:0030203	glycosaminoglycan metabolic process	1/62	157/17913	0.421163	0.48677	0.36754	SPOCK2	1	T1
GO:0002244	hematopoietic progenitor cell differentiation	1/62	158/17913	0.423185	0.48814	0.368574	BATF	1	T1
GO:0009408	response to heat	1/62	158/17913	0.423185	0.48814	0.368574	CDKN1A	1	T1
GO:0043535	regulation of blood vessel endothelial cell migration	1/62	158/17913	0.423185	0.48814	0.368574	ANXA1	1	T1
GO:0007266	Rho protein signal transduction	1/62	159/17913	0.425199	0.489818	0.369841	ITGB1	1	T1
GO:0009206	purine ribonucleoside triphosphate biosynthetic process	1/62	159/17913	0.425199	0.489818	0.369841	DDIT4	1	T1
GO:0002673	regulation of acute inflammatory response	1/62	160/17913	0.427206	0.490839	0.370611	CCR7	1	T1
GO:0009145	purine nucleoside triphosphate biosynthetic process	1/62	160/17913	0.427206	0.490839	0.370611	DDIT4	1	T1
GO:0035821	modification of morphology or physiology of other organism	1/62	160/17913	0.427206	0.490839	0.370611	CD4	1	T1
GO:0046661	male sex differentiation	1/62	160/17913	0.427206	0.490839	0.370611	ARID5B	1	T1
GO:0006022	aminoglycan metabolic process	1/62	161/17913	0.429207	0.491846	0.371372	SPOCK2	1	T1
GO:0006986	response to unfolded protein	1/62	161/17913	0.429207	0.491846	0.371372	LMNA	1	T1
GO:0010950	positive regulation of endopeptidase activity	1/62	161/17913	0.429207	0.491846	0.371372	TRADD	1	T1
GO:2001242	regulation of intrinsic apoptotic signaling pathway	1/62	163/17913	0.433187	0.495758	0.374326	TPT1	1	T1
GO:0009201	ribonucleoside triphosphate biosynthetic process	1/62	164/17913	0.435167	0.497374	0.375546	DDIT4	1	T1
GO:0034614	cellular response to reactive oxygen species	1/62	165/17913	0.43714	0.498004	0.376021	FOS	1	T1
GO:0060538	skeletal muscle organ development	1/62	165/17913	0.43714	0.498004	0.376021	FOS	1	T1
GO:1902275	regulation of chromatin organization	1/62	165/17913	0.43714	0.498004	0.376021	LMNA	1	T1
GO:0051262	protein tetramerization	1/62	166/17913	0.439106	0.498945	0.376732	S100A10	1	T1
GO:0120032	regulation of plasma membrane bounded cell projection assembly	1/62	166/17913	0.439106	0.498945	0.376732	CCR7	1	T1
GO:2001257	regulation of cation channel activity	1/62	166/17913	0.439106	0.498945	0.376732	AHNAK	1	T1
GO:0006612	protein targeting to membrane	1/62	167/17913	0.441065	0.500522	0.377923	RPLP0	1	T1
GO:0030308	negative regulation of cell growth	1/62	167/17913	0.441065	0.500522	0.377923	CDKN1A	1	T1
GO:0060491	regulation of cell projection assembly	1/62	168/17913	0.443018	0.502413	0.37935	CCR7	1	T1
GO:0006479	protein methylation	1/62	169/17913	0.444964	0.502991	0.379787	LMNA	1	T1
GO:0008213	protein alkylation	1/62	169/17913	0.444964	0.502991	0.379787	LMNA	1	T1
GO:0009166	nucleotide catabolic process	1/62	169/17913	0.444964	0.502991	0.379787	DDIT4	1	T1
GO:0038095	Fc-epsilon receptor signaling pathway	1/62	169/17913	0.444964	0.502991	0.379787	FOS	1	T1
GO:2001252	positive regulation of chromosome organization	1/62	169/17913	0.444964	0.502991	0.379787	LMNA	1	T1
GO:0008154	actin polymerization or depolymerization	1/62	170/17913	0.446904	0.504531	0.38095	CCR7	1	T1
GO:0050728	negative regulation of inflammatory response	1/62	170/17913	0.446904	0.504531	0.38095	SOCS3	1	T1
GO:0010921	regulation of phosphatase activity	1/62	171/17913	0.448836	0.505735	0.381859	RCAN3	1	T1
GO:0043433	negative regulation of DNA-binding transcription factor activity	1/62	171/17913	0.448836	0.505735	0.381859	TNFRSF4	1	T1
GO:0050821	protein stabilization	1/62	171/17913	0.448836	0.505735	0.381859	CDKN1A	1	T1
GO:0007416	synapse assembly	1/62	172/17913	0.450762	0.507579	0.383251	SPOCK2	1	T1
GO:0071478	cellular response to radiation	1/62	173/17913	0.452682	0.509413	0.384636	CDKN1A	1	T1
GO:0009127	purine nucleoside monophosphate biosynthetic process	1/62	174/17913	0.454595	0.510581	0.385518	DDIT4	1	T1
GO:0009168	purine ribonucleoside monophosphate biosynthetic process	1/62	174/17913	0.454595	0.510581	0.385518	DDIT4	1	T1
GO:0099003	vesicle-mediated transport in synapse	1/62	174/17913	0.454595	0.510581	0.385518	AP3M2	1	T1
GO:0009142	nucleoside triphosphate biosynthetic process	1/62	175/17913	0.456501	0.511083	0.385897	DDIT4	1	T1
GO:0010821	regulation of mitochondrion organization	1/62	175/17913	0.456501	0.511083	0.385897	LMNA	1	T1
GO:0022900	electron transport chain	1/62	175/17913	0.456501	0.511083	0.385897	NDUFV2	1	T1
GO:0035966	response to topologically incorrect protein	1/62	175/17913	0.456501	0.511083	0.385897	LMNA	1	T1
GO:1901292	nucleoside phosphate catabolic process	1/62	175/17913	0.456501	0.511083	0.385897	DDIT4	1	T1
GO:0045333	cellular respiration	1/62	176/17913	0.458401	0.512554	0.387008	NDUFV2	1	T1
GO:0071222	cellular response to lipopolysaccharide	1/62	176/17913	0.458401	0.512554	0.387008	VIM	1	T1
GO:0019083	viral transcription	1/62	177/17913	0.460294	0.513827	0.387969	RPLP0	1	T1
GO:2000045	regulation of G1/S transition of mitotic cell cycle	1/62	177/17913	0.460294	0.513827	0.387969	CDKN1A	1	T1
GO:0007187	G protein-coupled receptor signaling pathway, coupled to cyclic nucleotide second messenger	1/62	178/17913	0.462181	0.513827	0.387969	ANXA1	1	T1
GO:0007369	gastrulation	1/62	178/17913	0.462181	0.513827	0.387969	ITGB1	1	T1
GO:0010565	regulation of cellular ketone metabolic process	1/62	178/17913	0.462181	0.513827	0.387969	IRS2	1	T1
GO:0061138	morphogenesis of a branching epithelium	1/62	178/17913	0.462181	0.513827	0.387969	SOCS3	1	T1
GO:2001235	positive regulation of apoptotic signaling pathway	1/62	178/17913	0.462181	0.513827	0.387969	MAL	1	T1
GO:0006575	cellular modified amino acid metabolic process	1/62	179/17913	0.464061	0.514937	0.388807	SERINC5	1	T1
GO:0019362	pyridine nucleotide metabolic process	1/62	179/17913	0.464061	0.514937	0.388807	DDIT4	1	T1
GO:0046496	nicotinamide nucleotide metabolic process	1/62	179/17913	0.464061	0.514937	0.388807	DDIT4	1	T1
GO:0010952	positive regulation of peptidase activity	1/62	180/17913	0.465934	0.516361	0.389882	TRADD	1	T1
GO:0032271	regulation of protein polymerization	1/62	180/17913	0.465934	0.516361	0.389882	CCR7	1	T1
GO:0051099	positive regulation of binding	1/62	181/17913	0.467802	0.517448	0.390703	S100A10	1	T1
GO:1905330	regulation of morphogenesis of an epithelium	1/62	181/17913	0.467802	0.517448	0.390703	FOXP1	1	T1
GO:0043901	negative regulation of multi-organism process	1/62	182/17913	0.469662	0.518851	0.391762	TIMP1	1	T1
GO:0051216	cartilage development	1/62	182/17913	0.469662	0.518851	0.391762	TIMP1	1	T1
GO:0006413	translational initiation	1/62	183/17913	0.471517	0.519916	0.392566	RPLP0	1	T1
GO:0048639	positive regulation of developmental growth	1/62	183/17913	0.471517	0.519916	0.392566	EZR	1	T1
GO:0071219	cellular response to molecule of bacterial origin	1/62	183/17913	0.471517	0.519916	0.392566	VIM	1	T1
GO:0007179	transforming growth factor beta receptor signaling pathway	1/62	184/17913	0.473365	0.520969	0.393362	FOS	1	T1
GO:0072524	pyridine-containing compound metabolic process	1/62	184/17913	0.473365	0.520969	0.393362	DDIT4	1	T1
GO:0002703	regulation of leukocyte mediated immunity	1/62	185/17913	0.475207	0.522162	0.394263	IL7R	1	T1
GO:1902115	regulation of organelle assembly	1/62	185/17913	0.475207	0.522162	0.394263	EZR	1	T1
GO:0017157	regulation of exocytosis	1/62	187/17913	0.478871	0.525707	0.396939	ANXA1	1	T1
GO:0009156	ribonucleoside monophosphate biosynthetic process	1/62	188/17913	0.480694	0.527047	0.397951	DDIT4	1	T1
GO:0044242	cellular lipid catabolic process	1/62	189/17913	0.48251	0.527717	0.398457	IRS2	1	T1
GO:0060348	bone development	1/62	189/17913	0.48251	0.527717	0.398457	FOXP1	1	T1
GO:0006643	membrane lipid metabolic process	1/62	191/17913	0.486124	0.531007	0.400941	SERINC5	1	T1
GO:0019080	viral gene expression	1/62	191/17913	0.486124	0.531007	0.400941	RPLP0	1	T1
GO:0001763	morphogenesis of a branching structure	1/62	192/17913	0.487922	0.531313	0.401172	SOCS3	1	T1
GO:0006733	oxidoreduction coenzyme metabolic process	1/62	192/17913	0.487922	0.531313	0.401172	DDIT4	1	T1
GO:0030258	lipid modification	1/62	192/17913	0.487922	0.531313	0.401172	IRS2	1	T1
GO:0045732	positive regulation of protein catabolic process	1/62	192/17913	0.487922	0.531313	0.401172	EZR	1	T1
GO:0071897	DNA biosynthetic process	1/62	192/17913	0.487922	0.531313	0.401172	CDKN1A	1	T1
GO:0031099	regeneration	1/62	194/17913	0.491499	0.534212	0.403361	CDKN1A	1	T1
GO:2000377	regulation of reactive oxygen species metabolic process	1/62	194/17913	0.491499	0.534212	0.403361	CDKN1A	1	T1
GO:1902806	regulation of cell cycle G1/S phase transition	1/62	195/17913	0.493279	0.535813	0.40457	CDKN1A	1	T1
GO:0009124	nucleoside monophosphate biosynthetic process	1/62	196/17913	0.495052	0.53674	0.40527	DDIT4	1	T1
GO:0031396	regulation of protein ubiquitination	1/62	196/17913	0.495052	0.53674	0.40527	BIRC3	1	T1
GO:0043281	regulation of cysteine-type endopeptidase activity involved in apoptotic process	1/62	196/17913	0.495052	0.53674	0.40527	TRADD	1	T1
GO:0000075	cell cycle checkpoint	1/62	197/17913	0.496819	0.53799	0.406213	CDKN1A	1	T1
GO:0002221	pattern recognition receptor signaling pathway	1/62	197/17913	0.496819	0.53799	0.406213	BIRC3	1	T1
GO:0034764	positive regulation of transmembrane transport	1/62	199/17913	0.500335	0.54046	0.408078	IRS2	1	T1
GO:0048762	mesenchymal cell differentiation	1/62	199/17913	0.500335	0.54046	0.408078	S100A4	1	T1
GO:0071229	cellular response to acid chemical	1/62	199/17913	0.500335	0.54046	0.408078	SOCS1	1	T1
GO:0009612	response to mechanical stimulus	1/62	200/17913	0.502083	0.541681	0.409	FOS	1	T1
GO:1901605	alpha-amino acid metabolic process	1/62	200/17913	0.502083	0.541681	0.409	SERINC5	1	T1
GO:0007623	circadian rhythm	1/62	201/17913	0.503826	0.542892	0.409915	PPP1CB	1	T1
GO:2001020	regulation of response to DNA damage stimulus	1/62	201/17913	0.503826	0.542892	0.409915	TPT1	1	T1
GO:0032388	positive regulation of intracellular transport	1/62	203/17913	0.507294	0.546293	0.412482	EZR	1	T1
GO:0048705	skeletal system morphogenesis	1/62	204/17913	0.509019	0.547813	0.41363	ARID5B	1	T1
GO:0035303	regulation of dephosphorylation	1/62	206/17913	0.512451	0.550492	0.415653	RCAN3	1	T1
GO:0071216	cellular response to biotic stimulus	1/62	206/17913	0.512451	0.550492	0.415653	VIM	1	T1
GO:0034404	nucleobase-containing small molecule biosynthetic process	1/62	211/17913	0.520928	0.558228	0.421494	DDIT4	1	T1
GO:0010001	glial cell differentiation	1/62	212/17913	0.522606	0.559684	0.422593	VIM	1	T1
GO:0034329	cell junction assembly	1/62	214/17913	0.525944	0.562571	0.424773	S100A10	1	T1
GO:0060560	developmental growth involved in morphogenesis	1/62	214/17913	0.525944	0.562571	0.424773	ITGB1	1	T1
GO:0016358	dendrite development	1/62	216/17913	0.52926	0.565426	0.426929	ITGB1	1	T1
GO:0048588	developmental cell growth	1/62	216/17913	0.52926	0.565426	0.426929	ITGB1	1	T1
GO:0008406	gonad development	1/62	217/17913	0.530909	0.566842	0.427999	ARID5B	1	T1
GO:0002526	acute inflammatory response	1/62	220/17913	0.535823	0.571392	0.431434	CCR7	1	T1
GO:0019882	antigen processing and presentation	1/62	220/17913	0.535823	0.571392	0.431434	CCR7	1	T1
GO:0001649	osteoblast differentiation	1/62	222/17913	0.53907	0.574505	0.433784	JUNB	1	T1
GO:0045137	development of primary sexual characteristics	1/62	223/17913	0.540685	0.575526	0.434555	ARID5B	1	T1
GO:1903320	regulation of protein modification by small protein conjugation or removal	1/62	223/17913	0.540685	0.575526	0.434555	BIRC3	1	T1
GO:0007018	microtubule-based movement	1/62	224/17913	0.542295	0.576189	0.435056	AP3M2	1	T1
GO:0046434	organophosphate catabolic process	1/62	224/17913	0.542295	0.576189	0.435056	DDIT4	1	T1
GO:0098656	anion transmembrane transport	1/62	224/17913	0.542295	0.576189	0.435056	IRS2	1	T1
GO:0015850	organic hydroxy compound transport	1/62	228/17913	0.548679	0.582618	0.43991	AQP3	1	T1
GO:1903362	regulation of cellular protein catabolic process	1/62	230/17913	0.551838	0.585617	0.442175	EZR	1	T1
GO:0007050	cell cycle arrest	1/62	231/17913	0.55341	0.586574	0.442897	CDKN1A	1	T1
GO:0018105	peptidyl-serine phosphorylation	1/62	231/17913	0.55341	0.586574	0.442897	DDIT4	1	T1
GO:0051258	protein polymerization	1/62	232/17913	0.554975	0.587878	0.443881	CCR7	1	T1
GO:0032412	regulation of ion transmembrane transporter activity	1/62	234/17913	0.558091	0.590821	0.446104	AHNAK	1	T1
GO:0031348	negative regulation of defense response	1/62	237/17913	0.562724	0.595366	0.449535	SOCS3	1	T1
GO:0007281	germ cell development	1/62	238/17913	0.564258	0.596268	0.450217	CCR6	1	T1
GO:0031503	protein-containing complex localization	1/62	238/17913	0.564258	0.596268	0.450217	EZR	1	T1
GO:0031334	positive regulation of protein complex assembly	1/62	239/17913	0.565787	0.597523	0.451164	CCR7	1	T1
GO:0038093	Fc receptor signaling pathway	1/62	241/17913	0.568828	0.600011	0.453042	FOS	1	T1
GO:0042180	cellular ketone metabolic process	1/62	241/17913	0.568828	0.600011	0.453042	IRS2	1	T1
GO:0022898	regulation of transmembrane transporter activity	1/62	242/17913	0.570341	0.601244	0.453974	AHNAK	1	T1
GO:0045926	negative regulation of growth	1/62	244/17913	0.57335	0.604053	0.456095	CDKN1A	1	T1
GO:0009108	coenzyme biosynthetic process	1/62	245/17913	0.574847	0.605266	0.457011	DDIT4	1	T1
GO:0016054	organic acid catabolic process	1/62	250/17913	0.582256	0.611963	0.462067	IRS2	1	T1
GO:0043406	positive regulation of MAP kinase activity	1/62	250/17913	0.582256	0.611963	0.462067	CD40LG	1	T1
GO:0046395	carboxylic acid catabolic process	1/62	250/17913	0.582256	0.611963	0.462067	IRS2	1	T1
GO:0008654	phospholipid biosynthetic process	1/62	251/17913	0.583722	0.612768	0.462675	SERINC5	1	T1
GO:0090257	regulation of muscle system process	1/62	251/17913	0.583722	0.612768	0.462675	LMNA	1	T1
GO:0051650	establishment of vesicle localization	1/62	253/17913	0.58664	0.615462	0.464709	AP3M2	1	T1
GO:0034976	response to endoplasmic reticulum stress	1/62	254/17913	0.588091	0.616615	0.46558	LMNA	1	T1
GO:0032409	regulation of transporter activity	1/62	257/17913	0.592414	0.620777	0.468722	AHNAK	1	T1
GO:0060485	mesenchyme development	1/62	258/17913	0.593846	0.621904	0.469573	S100A4	1	T1
GO:0006260	DNA replication	1/62	260/17913	0.596693	0.623767	0.47098	S100A11	1	T1
GO:0010769	regulation of cell morphogenesis involved in differentiation	1/62	260/17913	0.596693	0.623767	0.47098	S100A10	1	T1
GO:0016579	protein deubiquitination	1/62	260/17913	0.596693	0.623767	0.47098	BIRC3	1	T1
GO:0009152	purine ribonucleotide biosynthetic process	1/62	266/17913	0.605119	0.631444	0.476777	DDIT4	1	T1
GO:0043270	positive regulation of ion transport	1/62	266/17913	0.605119	0.631444	0.476777	CD4	1	T1
GO:0045927	positive regulation of growth	1/62	266/17913	0.605119	0.631444	0.476777	EZR	1	T1
GO:0007548	sex differentiation	1/62	269/17913	0.609267	0.635394	0.479759	ARID5B	1	T1
GO:0051648	vesicle localization	1/62	270/17913	0.61064	0.636447	0.480554	AP3M2	1	T1
GO:0070646	protein modification by small protein removal	1/62	273/17913	0.61473	0.640329	0.483485	BIRC3	1	T1
GO:0007059	chromosome segregation	1/62	275/17913	0.617434	0.642763	0.485323	NR3C1	1	T1
GO:0001822	kidney development	1/62	276/17913	0.618779	0.64378	0.486091	ARID5B	1	T1
GO:0034330	cell junction organization	1/62	277/17913	0.620119	0.644791	0.486854	S100A10	1	T1
GO:0009260	ribonucleotide biosynthetic process	1/62	279/17913	0.622785	0.647179	0.488657	DDIT4	1	T1
GO:0006164	purine nucleotide biosynthetic process	1/62	280/17913	0.624112	0.648173	0.489408	DDIT4	1	T1
GO:0090068	positive regulation of cell cycle process	1/62	283/17913	0.628063	0.65189	0.492214	CDKN1A	1	T1
GO:0046390	ribose phosphate biosynthetic process	1/62	284/17913	0.629371	0.65286	0.492947	DDIT4	1	T1
GO:0048511	rhythmic process	1/62	287/17913	0.633268	0.656514	0.495706	PPP1CB	1	T1
GO:0072001	renal system development	1/62	291/17913	0.638401	0.661053	0.499133	ARID5B	1	T1
GO:0072522	purine-containing compound biosynthetic process	1/62	291/17913	0.638401	0.661053	0.499133	DDIT4	1	T1
GO:0015849	organic acid transport	1/62	293/17913	0.640941	0.662899	0.500527	IRS2	1	T1
GO:0046942	carboxylic acid transport	1/62	293/17913	0.640941	0.662899	0.500527	IRS2	1	T1
GO:0043010	camera-type eye development	1/62	295/17913	0.643464	0.665115	0.5022	VIM	1	T1
GO:0034599	cellular response to oxidative stress	1/62	296/17913	0.644718	0.666019	0.502882	FOS	1	T1
GO:0002758	innate immune response-activating signal transduction	1/62	298/17913	0.647215	0.66781	0.504234	BIRC3	1	T1
GO:0032984	protein-containing complex disassembly	1/62	298/17913	0.647215	0.66781	0.504234	DDIT4	1	T1
GO:0006650	glycerophospholipid metabolic process	1/62	300/17913	0.649694	0.669578	0.50557	SERINC5	1	T1
GO:0016042	lipid catabolic process	1/62	300/17913	0.649694	0.669578	0.50557	IRS2	1	T1
GO:0009101	glycoprotein biosynthetic process	1/62	302/17913	0.652156	0.67172	0.507187	CCR7	1	T1
GO:0051188	cofactor biosynthetic process	1/62	310/17913	0.661835	0.680489	0.513808	DDIT4	1	T1
GO:0071214	cellular response to abiotic stimulus	1/62	310/17913	0.661835	0.680489	0.513808	CDKN1A	1	T1
GO:0104004	cellular response to environmental stimulus	1/62	310/17913	0.661835	0.680489	0.513808	CDKN1A	1	T1
GO:0033044	regulation of chromosome organization	1/62	311/17913	0.663026	0.681313	0.514431	LMNA	1	T1
GO:1904062	regulation of cation transmembrane transport	1/62	312/17913	0.664213	0.682133	0.515049	AHNAK	1	T1
GO:0060562	epithelial tube morphogenesis	1/62	313/17913	0.665395	0.682947	0.515664	FOXP1	1	T1
GO:0072330	monocarboxylic acid biosynthetic process	1/62	318/17913	0.671248	0.68855	0.519895	DDIT4	1	T1
GO:0002218	activation of innate immune response	1/62	319/17913	0.672407	0.689335	0.520487	BIRC3	1	T1
GO:0071902	positive regulation of protein serine/threonine kinase activity	1/62	322/17913	0.675858	0.692468	0.522853	CD40LG	1	T1
GO:0001655	urogenital system development	1/62	324/17913	0.678139	0.694398	0.52431	ARID5B	1	T1
GO:0007596	blood coagulation	1/62	331/17913	0.685998	0.702036	0.530077	CD40LG	1	T1
GO:0006869	lipid transport	1/62	332/17913	0.687106	0.702348	0.530313	IRS2	1	T1
GO:0030336	negative regulation of cell migration	1/62	332/17913	0.687106	0.702348	0.530313	TIMP1	1	T1
GO:0045862	positive regulation of proteolysis	1/62	333/17913	0.688209	0.703065	0.530855	TRADD	1	T1
GO:0007599	hemostasis	1/62	336/17913	0.691497	0.706012	0.533079	CD40LG	1	T1
GO:0050817	coagulation	1/62	337/17913	0.692585	0.706711	0.533607	CD40LG	1	T1
GO:0006631	fatty acid metabolic process	1/62	339/17913	0.69475	0.708507	0.534964	IRS2	1	T1
GO:0001654	eye development	1/62	342/17913	0.697969	0.711376	0.53713	VIM	1	T1
GO:0006936	muscle contraction	1/62	343/17913	0.699035	0.712048	0.537637	VIM	1	T1
GO:0006790	sulfur compound metabolic process	1/62	346/17913	0.70221	0.714451	0.539451	SPOCK2	1	T1
GO:0150063	visual system development	1/62	346/17913	0.70221	0.714451	0.539451	VIM	1	T1
GO:0006520	cellular amino acid metabolic process	1/62	347/17913	0.703261	0.71469	0.539632	SERINC5	1	T1
GO:2000146	negative regulation of cell motility	1/62	347/17913	0.703261	0.71469	0.539632	TIMP1	1	T1
GO:0048880	sensory system development	1/62	351/17913	0.707429	0.718508	0.542515	VIM	1	T1
GO:0010639	negative regulation of organelle organization	1/62	352/17913	0.708462	0.71914	0.542992	LMNA	1	T1
GO:0009165	nucleotide biosynthetic process	1/62	360/17913	0.716597	0.726976	0.548908	DDIT4	1	T1
GO:0031346	positive regulation of cell projection organization	1/62	362/17913	0.718595	0.728581	0.550121	CCR7	1	T1
GO:0006605	protein targeting	1/62	364/17913	0.72058	0.729904	0.551119	RPLP0	1	T1
GO:0010256	endomembrane system organization	1/62	365/17913	0.721567	0.729904	0.551119	LMNA	1	T1
GO:0051271	negative regulation of cellular component movement	1/62	365/17913	0.721567	0.729904	0.551119	TIMP1	1	T1
GO:1901293	nucleoside phosphate biosynthetic process	1/62	365/17913	0.721567	0.729904	0.551119	DDIT4	1	T1
GO:0010876	lipid localization	1/62	366/17913	0.722551	0.730477	0.551552	IRS2	1	T1
GO:0051098	regulation of binding	1/62	368/17913	0.724508	0.732033	0.552727	S100A10	1	T1
GO:0045089	positive regulation of innate immune response	1/62	373/17913	0.729342	0.736068	0.555773	BIRC3	1	T1
GO:0045787	positive regulation of cell cycle	1/62	373/17913	0.729342	0.736068	0.555773	CDKN1A	1	T1
GO:0018205	peptidyl-lysine modification	1/62	376/17913	0.732202	0.738529	0.557631	LMNA	1	T1
GO:0040013	negative regulation of locomotion	1/62	377/17913	0.733149	0.739058	0.558031	TIMP1	1	T1
GO:0046486	glycerolipid metabolic process	1/62	385/17913	0.740605	0.746145	0.563382	SERINC5	1	T1
GO:0001503	ossification	1/62	388/17913	0.743348	0.748478	0.565144	JUNB	1	T1
GO:0050804	modulation of chemical synaptic transmission	1/62	393/17913	0.747857	0.752585	0.568244	ITGB1	1	T1
GO:0050808	synapse organization	1/62	394/17913	0.748749	0.752617	0.568269	SPOCK2	1	T1
GO:0099177	regulation of trans-synaptic signaling	1/62	394/17913	0.748749	0.752617	0.568269	ITGB1	1	T1
GO:0001558	regulation of cell growth	1/62	396/17913	0.750524	0.753969	0.56929	CDKN1A	1	T1
GO:0032386	regulation of intracellular transport	1/62	400/17913	0.754038	0.757064	0.571627	EZR	1	T1
GO:0044282	small molecule catabolic process	1/62	404/17913	0.757503	0.760107	0.573925	IRS2	1	T1
GO:0043254	regulation of protein complex assembly	1/62	409/17913	0.761766	0.763948	0.576824	CCR7	1	T1
GO:0016570	histone modification	1/62	420/17913	0.770889	0.772654	0.583398	LMNA	1	T1
GO:0015711	organic anion transport	1/62	430/17913	0.778883	0.780219	0.58911	IRS2	1	T1
GO:0016569	covalent chromatin modification	1/62	433/17913	0.781227	0.78212	0.590546	LMNA	1	T1
GO:0008380	RNA splicing	1/62	440/17913	0.786602	0.787052	0.594269	AHNAK	1	T1
GO:0048871	multicellular organismal homeostasis	1/62	472/17913	0.809565	0.809565	0.611268	AQP3	1	T1
GO:0002694	regulation of leukocyte activation	30/191	492/17913	9.37e-15	1.12e-11	8.79e-12	CCL5/CST7/HLA-DPB1/CD74/HLA-DPA1/PIK3R1/TNFSF9/RUNX3/CD81/PTPRC/FYN/TIGIT/VCAM1/CCL3/CD160/CD84/IFNG/HLA-F/SELENOK/TOX/ZFP36L2/XCL1/LAG3/TNFRSF1B/SMAD7/PTPN22/IRF1/TGFB1/NR4A3/ZBTB1	30	T2
GO:0042110	T cell activation	29/191	443/17913	4.38e-15	1.12e-11	8.79e-12	CCL5/CD8A/HLA-DPB1/CD74/CD8B/HLA-DPA1/PIK3R1/TNFSF9/RUNX3/CD81/PTPRC/FYN/TIGIT/JMJD6/CD3D/VCAM1/CD160/EOMES/IFNG/SELENOK/ZFP36L2/XCL1/LAG3/TNFRSF1B/SMAD7/PTPN22/IRF1/TGFB1/ZBTB1	29	T2
GO:0022407	regulation of cell-cell adhesion	26/191	389/17913	8e-14	5.12e-11	4.02e-11	CCL5/HLA-DPB1/CD74/HLA-DPA1/PIK3R1/RUNX3/AKNA/CD81/PTPRC/FYN/TIGIT/VCAM1/CD160/IFNG/SELENOK/XCL1/LAG3/SMAD7/PTPN22/IRF1/TGFB1/WNK1/ITGA4/NR4A3/ZBTB1/MYADM	26	T2
GO:0051249	regulation of lymphocyte activation	26/191	401/17913	1.62e-13	7.42e-11	5.83e-11	CCL5/HLA-DPB1/CD74/HLA-DPA1/PIK3R1/TNFSF9/RUNX3/CD81/PTPRC/FYN/TIGIT/VCAM1/CD160/IFNG/HLA-F/SELENOK/TOX/ZFP36L2/XCL1/LAG3/TNFRSF1B/SMAD7/PTPN22/IRF1/TGFB1/ZBTB1	26	T2
GO:1903037	regulation of leukocyte cell-cell adhesion	24/191	295/17913	1.05e-14	1.12e-11	8.79e-12	CCL5/HLA-DPB1/CD74/HLA-DPA1/PIK3R1/RUNX3/CD81/PTPRC/FYN/TIGIT/VCAM1/CD160/IFNG/SELENOK/XCL1/LAG3/SMAD7/PTPN22/IRF1/TGFB1/WNK1/ITGA4/NR4A3/ZBTB1	24	T2
GO:0007159	leukocyte cell-cell adhesion	24/191	328/17913	1.09e-13	5.83e-11	4.58e-11	CCL5/HLA-DPB1/CD74/HLA-DPA1/PIK3R1/RUNX3/CD81/PTPRC/FYN/TIGIT/VCAM1/CD160/IFNG/SELENOK/XCL1/LAG3/SMAD7/PTPN22/IRF1/TGFB1/WNK1/ITGA4/NR4A3/ZBTB1	24	T2
GO:0050863	regulation of T cell activation	23/191	307/17913	2.25e-13	8.99e-11	7.06e-11	CCL5/HLA-DPB1/CD74/HLA-DPA1/PIK3R1/TNFSF9/RUNX3/CD81/PTPRC/FYN/TIGIT/VCAM1/CD160/IFNG/SELENOK/XCL1/LAG3/TNFRSF1B/SMAD7/PTPN22/IRF1/TGFB1/ZBTB1	23	T2
GO:0002521	leukocyte differentiation	23/191	485/17913	2.23e-09	2.55e-07	2e-07	CD74/PIK3R1/RUNX3/CD81/PTPRC/JMJD6/CD3D/VCAM1/CCL3/ITM2A/EOMES/IFNG/TOX/ZFP36L2/LAG3/GNAS/SMAD7/PTPN22/IRF1/TGFB1/ZBTB7A/ITGA4/ZBTB1	23	T2
GO:0002697	regulation of immune effector process	22/191	441/17913	2.02e-09	2.39e-07	1.88e-07	CD74/CRTAM/SH2D1A/APOBEC3G/CD81/PTPRC/CD160/CD84/IFNG/HLA-F/SELENOK/XCL1/LAG3/TNFRSF1B/RNF125/SMAD7/TGFB1/IGKC/SERPINB9/NR4A3/ZBTB1/IGLC2	22	T2
GO:0001819	positive regulation of cytokine production	22/191	446/17913	2.48e-09	2.65e-07	2.08e-07	HLA-DPB1/CD74/HLA-DPA1/CRTAM/PIK3R1/CD81/PTPRC/TIGIT/CCL3/CD160/F2R/DDX3X/IFNG/HLA-F/SELENOK/XCL1/RNF125/PTPN22/IRF1/TGFB1/PDE4B/NR4A3	22	T2
GO:0050900	leukocyte migration	22/191	467/17913	5.77e-09	5.95e-07	4.68e-07	CCL5/CCL4/CD74/CXCR4/LYST/PIK3R1/CD81/FYN/VCAM1/CCL3/CD84/CXCR3/SELENOK/ATP1B3/XCL1/DUSP1/TGFB1/WNK1/IGKC/ITGA4/PDE4B/IGLC2	22	T2
GO:0045785	positive regulation of cell adhesion	21/191	388/17913	1.13e-09	1.57e-07	1.23e-07	CCL5/HLA-DPB1/CD74/HLA-DPA1/PIK3R1/RUNX3/CD81/PTPRC/FYN/VCAM1/CD160/IFNG/SELENOK/UTRN/XCL1/SMAD7/TGFB1/ITGA4/NR4A3/ZBTB1/MYADM	21	T2
GO:0002429	immune response-activating cell surface receptor signaling pathway	21/191	399/17913	1.86e-09	2.29e-07	1.8e-07	HLA-DRB1/HLA-DPB1/HLA-DPA1/HLA-DQA1/PIK3R1/HLA-DRA/HLA-DQA2/HLA-DQB1/CD81/PTPRC/FYN/CD3D/CD160/WIPF1/PRKCH/PTPN22/WNK1/IGKC/PDE4B/NR4A3/IGLC2	21	T2
GO:0002768	immune response-regulating cell surface receptor signaling pathway	21/191	434/17913	8.22e-09	7.74e-07	6.08e-07	HLA-DRB1/HLA-DPB1/HLA-DPA1/HLA-DQA1/PIK3R1/HLA-DRA/HLA-DQA2/HLA-DQB1/CD81/PTPRC/FYN/CD3D/CD160/WIPF1/PRKCH/PTPN22/WNK1/IGKC/PDE4B/NR4A3/IGLC2	21	T2
GO:0002449	lymphocyte mediated immunity	20/191	293/17913	4.89e-11	1.2e-08	9.45e-09	CD74/GZMM/LYST/CRTAM/SH2D1A/HLA-DQB1/CD81/PTPRC/CD160/SLAMF7/HLA-F/XCL1/LAG3/TNFRSF1B/SMAD7/TGFB1/IGKC/SERPINB9/ZBTB1/IGLC2	20	T2
GO:0002696	positive regulation of leukocyte activation	20/191	305/17913	1e-10	2.14e-08	1.68e-08	CCL5/HLA-DPB1/CD74/HLA-DPA1/PIK3R1/RUNX3/CD81/PTPRC/FYN/VCAM1/CCL3/CD160/IFNG/HLA-F/SELENOK/TOX/XCL1/TGFB1/NR4A3/ZBTB1	20	T2
GO:0050867	positive regulation of cell activation	20/191	319/17913	2.22e-10	4.45e-08	3.5e-08	CCL5/HLA-DPB1/CD74/HLA-DPA1/PIK3R1/RUNX3/CD81/PTPRC/FYN/VCAM1/CCL3/CD160/IFNG/HLA-F/SELENOK/TOX/XCL1/TGFB1/NR4A3/ZBTB1	20	T2
GO:0030098	lymphocyte differentiation	20/191	325/17913	3.09e-10	5.49e-08	4.32e-08	CD74/PIK3R1/RUNX3/PTPRC/JMJD6/CD3D/VCAM1/ITM2A/EOMES/IFNG/TOX/ZFP36L2/LAG3/SMAD7/PTPN22/IRF1/TGFB1/ZBTB7A/ITGA4/ZBTB1	20	T2
GO:0022409	positive regulation of cell-cell adhesion	19/191	251/17913	2.57e-11	6.85e-09	5.38e-09	CCL5/HLA-DPB1/CD74/HLA-DPA1/PIK3R1/RUNX3/CD81/PTPRC/FYN/VCAM1/CD160/IFNG/SELENOK/XCL1/SMAD7/TGFB1/ITGA4/NR4A3/ZBTB1	19	T2
GO:0002683	negative regulation of immune system process	19/191	451/17913	3.78e-07	1.98e-05	1.55e-05	CST7/CD74/PIK3R1/RUNX3/PTPRC/TIGIT/CCL3/CD160/CD84/HLA-F/XCL1/LAG3/DUSP1/RNF125/SMAD7/PTPN22/IRF1/TGFB1/SERPINB9	19	T2
GO:1903039	positive regulation of leukocyte cell-cell adhesion	18/191	214/17913	1.52e-11	4.43e-09	3.48e-09	CCL5/HLA-DPB1/CD74/HLA-DPA1/PIK3R1/RUNX3/CD81/PTPRC/FYN/VCAM1/CD160/IFNG/SELENOK/XCL1/TGFB1/ITGA4/NR4A3/ZBTB1	18	T2
GO:0051251	positive regulation of lymphocyte activation	18/191	258/17913	3.34e-10	5.62e-08	4.42e-08	CCL5/HLA-DPB1/CD74/HLA-DPA1/PIK3R1/RUNX3/CD81/PTPRC/FYN/VCAM1/CD160/IFNG/HLA-F/SELENOK/TOX/XCL1/TGFB1/ZBTB1	18	T2
GO:0071346	cellular response to interferon-gamma	17/191	153/17913	6.32e-13	2.25e-10	1.77e-10	CCL5/HLA-DRB1/HLA-DPB1/HLA-A/HLA-DPA1/HLA-DQA1/HLA-C/HLA-DRA/HLA-DQA2/HLA-B/HLA-DQB1/VCAM1/CCL3/IFNG/HLA-F/IRF1/IFNGR1	17	T2
GO:0034341	response to interferon-gamma	17/191	173/17913	4.73e-12	1.51e-09	1.19e-09	CCL5/HLA-DRB1/HLA-DPB1/HLA-A/HLA-DPA1/HLA-DQA1/HLA-C/HLA-DRA/HLA-DQA2/HLA-B/HLA-DQB1/VCAM1/CCL3/IFNG/HLA-F/IRF1/IFNGR1	17	T2
GO:0050851	antigen receptor-mediated signaling pathway	17/191	224/17913	2.88e-10	5.43e-08	4.27e-08	HLA-DRB1/HLA-DPB1/HLA-DPA1/HLA-DQA1/PIK3R1/HLA-DRA/HLA-DQA2/HLA-DQB1/CD81/PTPRC/FYN/CD3D/CD160/PRKCH/PTPN22/WNK1/PDE4B	17	T2
GO:0071900	regulation of protein serine/threonine kinase activity	17/191	479/17913	1.55e-05	0.000485062	0.000381188	CD74/ZEB2/CXCR4/CD81/PTPRC/UBC/CALM2/F2R/DDX3X/IFNG/PDCD4/DUSP5/DUSP1/SERTAD1/PTPN22/TGFB1/WNK1	17	T2
GO:0050852	T cell receptor signaling pathway	16/191	180/17913	9.42e-11	2.14e-08	1.68e-08	HLA-DRB1/HLA-DPB1/HLA-DPA1/HLA-DQA1/PIK3R1/HLA-DRA/HLA-DQA2/HLA-DQB1/CD81/PTPRC/FYN/CD3D/CD160/PTPN22/WNK1/PDE4B	16	T2
GO:0050870	positive regulation of T cell activation	16/191	198/17913	3.91e-10	6.25e-08	4.91e-08	CCL5/HLA-DPB1/CD74/HLA-DPA1/PIK3R1/RUNX3/CD81/PTPRC/FYN/VCAM1/CD160/IFNG/SELENOK/XCL1/TGFB1/ZBTB1	16	T2
GO:0019882	antigen processing and presentation	16/191	220/17913	1.83e-09	2.29e-07	1.8e-07	HLA-DRB1/CD8A/HLA-DPB1/CD74/HLA-A/HLA-DPA1/HLA-DQA1/HLA-C/HLA-DRA/HLA-DQA2/HLA-B/HLA-DQB1/HLA-DMA/HLA-F/LAG3/DYNC1H1	16	T2
GO:0007162	negative regulation of cell adhesion	16/191	271/17913	3.57e-08	2.72e-06	2.14e-06	CD74/PIK3R1/RUNX3/AKNA/PTPRC/TIGIT/XCL1/LAG3/DUSP1/SMAD7/PTPN22/IRF1/SIPA1/TGFB1/WNK1/MYADM	16	T2
GO:0045088	regulation of innate immune response	16/191	440/17913	2.07e-05	0.000606505	0.000476625	CCL5/CRTAM/SH2D1A/UBC/FYN/CD160/IFNG/PYHIN1/HLA-F/LAG3/SFPQ/RNF125/PTPN22/IRF1/SERPINB9/IFNGR1	16	T2
GO:1903706	regulation of hemopoiesis	16/191	468/17913	4.35e-05	0.00118862	0.000934085	CD74/PIK3R1/RUNX3/PTPRC/H3F3B/CCL3/IFNG/TOX/ZFP36L2/LAG3/GNAS/SMAD7/IRF1/TGFB1/NR4A3/ZBTB1	16	T2
GO:0060333	interferon-gamma-mediated signaling pathway	15/191	91/17913	4.06e-14	3.25e-11	2.55e-11	HLA-DRB1/HLA-DPB1/HLA-A/HLA-DPA1/HLA-DQA1/HLA-C/HLA-DRA/HLA-DQA2/HLA-B/HLA-DQB1/VCAM1/IFNG/HLA-F/IRF1/IFNGR1	15	T2
GO:0002478	antigen processing and presentation of exogenous peptide antigen	15/191	174/17913	5.72e-10	8.71e-08	6.85e-08	HLA-DRB1/HLA-DPB1/CD74/HLA-A/HLA-DPA1/HLA-DQA1/HLA-C/HLA-DRA/HLA-DQA2/HLA-B/HLA-DQB1/HLA-DMA/HLA-F/LAG3/DYNC1H1	15	T2
GO:0019884	antigen processing and presentation of exogenous antigen	15/191	176/17913	6.71e-10	9.76e-08	7.67e-08	HLA-DRB1/HLA-DPB1/CD74/HLA-A/HLA-DPA1/HLA-DQA1/HLA-C/HLA-DRA/HLA-DQA2/HLA-B/HLA-DQB1/HLA-DMA/HLA-F/LAG3/DYNC1H1	15	T2
GO:0048002	antigen processing and presentation of peptide antigen	15/191	188/17913	1.68e-09	2.24e-07	1.76e-07	HLA-DRB1/HLA-DPB1/CD74/HLA-A/HLA-DPA1/HLA-DQA1/HLA-C/HLA-DRA/HLA-DQA2/HLA-B/HLA-DQB1/HLA-DMA/HLA-F/LAG3/DYNC1H1	15	T2
GO:0046651	lymphocyte proliferation	15/191	244/17913	5.71e-08	3.97e-06	3.12e-06	CCL5/HLA-DPB1/CD74/HLA-DPA1/TNFSF9/CD81/PTPRC/FYN/VCAM1/SELENOK/XCL1/TNFRSF1B/PTPN22/IRF1/TGFB1	15	T2
GO:0032943	mononuclear cell proliferation	15/191	246/17913	6.36e-08	4.24e-06	3.33e-06	CCL5/HLA-DPB1/CD74/HLA-DPA1/TNFSF9/CD81/PTPRC/FYN/VCAM1/SELENOK/XCL1/TNFRSF1B/PTPN22/IRF1/TGFB1	15	T2
GO:0070661	leukocyte proliferation	15/191	270/17913	2.14e-07	1.24e-05	9.78e-06	CCL5/HLA-DPB1/CD74/HLA-DPA1/TNFSF9/CD81/PTPRC/FYN/VCAM1/SELENOK/XCL1/TNFRSF1B/PTPN22/IRF1/TGFB1	15	T2
GO:0006397	mRNA processing	15/191	499/17913	0.000307355	0.00578551	0.00454657	SRSF7/SRSF2/DDX5/JMJD6/SRSF5/CCNH/HNRNPH1/FUS/CNOT6L/SRRM2/SRSF3/TENT4B/SFPQ/ZBTB7A/SRRT	15	T2
GO:0002703	regulation of leukocyte mediated immunity	14/191	185/17913	1.18e-08	1.02e-06	8.03e-07	CRTAM/SH2D1A/CD81/PTPRC/CD160/CD84/HLA-F/XCL1/LAG3/TNFRSF1B/SMAD7/TGFB1/SERPINB9/ZBTB1	14	T2
GO:0002699	positive regulation of immune effector process	14/191	198/17913	2.8e-08	2.3e-06	1.81e-06	CD74/CRTAM/SH2D1A/CD81/PTPRC/CD160/CD84/IFNG/HLA-F/XCL1/LAG3/TGFB1/NR4A3/ZBTB1	14	T2
GO:0050670	regulation of lymphocyte proliferation	14/191	199/17913	2.99e-08	2.39e-06	1.88e-06	CCL5/HLA-DPB1/CD74/HLA-DPA1/TNFSF9/CD81/PTPRC/VCAM1/SELENOK/XCL1/TNFRSF1B/PTPN22/IRF1/TGFB1	14	T2
GO:0032944	regulation of mononuclear cell proliferation	14/191	200/17913	3.18e-08	2.48e-06	1.95e-06	CCL5/HLA-DPB1/CD74/HLA-DPA1/TNFSF9/CD81/PTPRC/VCAM1/SELENOK/XCL1/TNFRSF1B/PTPN22/IRF1/TGFB1	14	T2
GO:0070663	regulation of leukocyte proliferation	14/191	214/17913	7.43e-08	4.76e-06	3.74e-06	CCL5/HLA-DPB1/CD74/HLA-DPA1/TNFSF9/CD81/PTPRC/VCAM1/SELENOK/XCL1/TNFRSF1B/PTPN22/IRF1/TGFB1	14	T2
GO:0030217	T cell differentiation	14/191	234/17913	2.24e-07	1.26e-05	9.88e-06	CD74/RUNX3/PTPRC/JMJD6/CD3D/EOMES/IFNG/ZFP36L2/LAG3/SMAD7/PTPN22/IRF1/TGFB1/ZBTB1	14	T2
GO:1902105	regulation of leukocyte differentiation	14/191	267/17913	1.1e-06	5.17e-05	4.06e-05	CD74/PIK3R1/RUNX3/PTPRC/CCL3/IFNG/TOX/ZFP36L2/LAG3/GNAS/SMAD7/IRF1/TGFB1/ZBTB1	14	T2
GO:0010959	regulation of metal ion transport	14/191	365/17913	3.87e-05	0.00109646	0.000861658	CCL5/CCL4/CXCR4/FYN/CALM2/CCL3/CD84/F2R/UTRN/ATP1B3/XCL1/TGFB1/WNK1/PDE4B	14	T2
GO:0008380	RNA splicing	14/191	440/17913	0.000276162	0.00532599	0.00418546	SRSF7/SRSF2/PIK3R1/DDX5/JMJD6/SRSF5/RBM38/HNRNPH1/FUS/SRRM2/SRSF3/SFPQ/ZBTB7A/SRRT	14	T2
GO:0002706	regulation of lymphocyte mediated immunity	13/191	136/17913	2.35e-09	2.6e-07	2.04e-07	CRTAM/SH2D1A/CD81/PTPRC/CD160/HLA-F/XCL1/LAG3/TNFRSF1B/SMAD7/TGFB1/SERPINB9/ZBTB1	13	T2
GO:0002695	negative regulation of leukocyte activation	13/191	163/17913	2.13e-08	1.8e-06	1.41e-06	CST7/CD74/RUNX3/PTPRC/TIGIT/CD84/HLA-F/XCL1/LAG3/SMAD7/PTPN22/IRF1/TGFB1	13	T2
GO:0042098	T cell proliferation	13/191	177/17913	5.69e-08	3.97e-06	3.12e-06	CCL5/HLA-DPB1/HLA-DPA1/TNFSF9/CD81/PTPRC/FYN/VCAM1/SELENOK/XCL1/TNFRSF1B/IRF1/TGFB1	13	T2
GO:0050866	negative regulation of cell activation	13/191	187/17913	1.09e-07	6.82e-06	5.36e-06	CST7/CD74/RUNX3/PTPRC/TIGIT/CD84/HLA-F/XCL1/LAG3/SMAD7/PTPN22/IRF1/TGFB1	13	T2
GO:0001818	negative regulation of cytokine production	13/191	290/17913	1.46e-05	0.000463749	0.00036444	PTPRC/TIGIT/REL/CD84/IFNG/PDCD4/HLA-F/XCL1/LAG3/RNF125/SMAD7/PTPN22/TGFB1	13	T2
GO:0002460	adaptive immune response based on somatic recombination of immune receptors built from immunoglobulin superfamily domains	13/191	295/17913	1.75e-05	0.000544759	0.000428102	CD74/GZMM/HLA-DQB1/CD81/PTPRC/HLA-F/XCL1/TNFRSF1B/SMAD7/TGFB1/IGKC/ZBTB1/IGLC2	13	T2
GO:0009615	response to virus	13/191	323/17913	4.5e-05	0.00122106	0.00095958	CCL5/CCL4/CXCR4/LYST/APOBEC3G/PTPRC/DDX3X/IFNG/SELENOK/XCL1/RNF125/IRF1/IFNGR1	13	T2
GO:0019058	viral life cycle	13/191	324/17913	4.65e-05	0.00123938	0.000973972	CCL5/CD74/CXCR4/DDX5/APOBEC3G/CD81/UBC/DDX3X/CXCR6/RANBP2/SLC1A5/KPNA2/DDX6	13	T2
GO:0045089	positive regulation of innate immune response	13/191	373/17913	0.00019035	0.00400737	0.00314921	CCL5/CRTAM/SH2D1A/UBC/FYN/CD160/PYHIN1/HLA-F/LAG3/SFPQ/RNF125/PTPN22/IRF1	13	T2
GO:0051222	positive regulation of protein transport	13/191	403/17913	0.000400672	0.00703947	0.005532	CRTAM/PIK3R1/CD81/FYN/CCL3/CD160/OAZ1/F2R/IFNG/SELENOK/ARF6/PTPN22/TGFB1	13	T2
GO:0006816	calcium ion transport	13/191	415/17913	0.000528189	0.00866772	0.00681157	CCL5/CCL4/CXCR4/PTPRC/FYN/CALM2/CCL3/FASLG/CD84/F2R/XCL1/TGFB1/PDE4B	13	T2
GO:1904951	positive regulation of establishment of protein localization	13/191	440/17913	0.000906866	0.0133731	0.0105094	CRTAM/PIK3R1/CD81/FYN/CCL3/CD160/OAZ1/F2R/IFNG/SELENOK/ARF6/PTPN22/TGFB1	13	T2
GO:0070838	divalent metal ion transport	13/191	454/17913	0.00120422	0.0173582	0.013641	CCL5/CCL4/CXCR4/PTPRC/FYN/CALM2/CCL3/FASLG/CD84/F2R/XCL1/TGFB1/PDE4B	13	T2
GO:0072511	divalent inorganic cation transport	13/191	458/17913	0.00130279	0.0183826	0.014446	CCL5/CCL4/CXCR4/PTPRC/FYN/CALM2/CCL3/FASLG/CD84/F2R/XCL1/TGFB1/PDE4B	13	T2
GO:0002791	regulation of peptide secretion	13/191	483/17913	0.00208327	0.0256403	0.0201495	CCL5/CD74/CRTAM/CCL3/CD160/F2R/IFNG/SELENOK/TNFRSF1B/MIDN/ARF6/PTPN22/TGFB1	13	T2
GO:0042129	regulation of T cell proliferation	12/191	149/17913	6.79e-08	4.43e-06	3.48e-06	CCL5/HLA-DPB1/HLA-DPA1/TNFSF9/CD81/PTPRC/VCAM1/SELENOK/XCL1/TNFRSF1B/IRF1/TGFB1	12	T2
GO:0001906	cell killing	12/191	156/17913	1.13e-07	6.94e-06	5.45e-06	GZMM/LYST/CRTAM/SH2D1A/PTPRC/CD160/SLAMF7/IFNG/HLA-F/XCL1/LAG3/SERPINB9	12	T2
GO:0022408	negative regulation of cell-cell adhesion	12/191	169/17913	2.7e-07	1.47e-05	1.15e-05	CD74/RUNX3/AKNA/TIGIT/XCL1/LAG3/SMAD7/PTPN22/IRF1/TGFB1/WNK1/MYADM	12	T2
GO:0002685	regulation of leukocyte migration	12/191	186/17913	7.57e-07	3.67e-05	2.88e-05	CCL5/CCL4/CD74/CD81/CCL3/CXCR3/SELENOK/XCL1/DUSP1/TGFB1/WNK1/ITGA4	12	T2
GO:0002440	production of molecular mediator of immune response	12/191	191/17913	1e-06	4.79e-05	3.77e-05	CD74/HLA-DQB1/CD81/PTPRC/CD160/ITM2A/HLA-F/XCL1/TNFRSF1B/SMAD7/TGFB1/NR4A3	12	T2
GO:0060326	cell chemotaxis	12/191	253/17913	1.8e-05	0.000548837	0.000431306	CCL5/CCL4/CD74/CXCR4/LYST/VCAM1/CCL3/CXCR3/XCL1/DUSP1/WNK1/PDE4B	12	T2
GO:0032496	response to lipopolysaccharide	12/191	295/17913	8.02e-05	0.00194354	0.00152734	CCL5/VCAM1/CCL3/FASLG/F2R/PDCD4/TNFRSF1B/LITAF/IL10RA/PTPN22/TGFB1/PDE4B	12	T2
GO:0002237	response to molecule of bacterial origin	12/191	309/17913	0.000124182	0.00287957	0.00226293	CCL5/VCAM1/CCL3/FASLG/F2R/PDCD4/TNFRSF1B/LITAF/IL10RA/PTPN22/TGFB1/PDE4B	12	T2
GO:0043405	regulation of MAP kinase activity	12/191	322/17913	0.000182214	0.00391331	0.0030753	CD74/ZEB2/CXCR4/CD81/PTPRC/UBC/F2R/PDCD4/DUSP5/DUSP1/PTPN22/TGFB1	12	T2
GO:0071902	positive regulation of protein serine/threonine kinase activity	12/191	322/17913	0.000182214	0.00391331	0.0030753	CD74/ZEB2/CXCR4/CD81/PTPRC/UBC/CALM2/F2R/DDX3X/IFNG/DUSP5/TGFB1	12	T2
GO:0000377	RNA splicing, via transesterification reactions with bulged adenosine as nucleophile	12/191	344/17913	0.000333236	0.00612847	0.00481609	SRSF7/SRSF2/DDX5/JMJD6/SRSF5/HNRNPH1/FUS/SRRM2/SRSF3/SFPQ/ZBTB7A/SRRT	12	T2
GO:0000398	mRNA splicing, via spliceosome	12/191	344/17913	0.000333236	0.00612847	0.00481609	SRSF7/SRSF2/DDX5/JMJD6/SRSF5/HNRNPH1/FUS/SRRM2/SRSF3/SFPQ/ZBTB7A/SRRT	12	T2
GO:0000375	RNA splicing, via transesterification reactions	12/191	348/17913	0.000369804	0.00672372	0.00528387	SRSF7/SRSF2/DDX5/JMJD6/SRSF5/HNRNPH1/FUS/SRRM2/SRSF3/SFPQ/ZBTB7A/SRRT	12	T2
GO:0043900	regulation of multi-organism process	12/191	408/17913	0.00147737	0.0205548	0.0161531	CCL5/CCL4/CD74/CXCR4/DDX5/APOBEC3G/CCL3/DDX3X/IFNG/SELENOK/RNF125/KPNA2	12	T2
GO:0050708	regulation of protein secretion	12/191	456/17913	0.00367529	0.0389435	0.0306039	CCL5/CRTAM/CCL3/CD160/F2R/IFNG/SELENOK/TNFRSF1B/MIDN/ARF6/PTPN22/TGFB1	12	T2
GO:0050727	regulation of inflammatory response	12/191	479/17913	0.00541095	0.0496133	0.0389889	CCL5/CST7/METRNL/AKNA/CD81/PTPRC/CCL3/PDCD4/XCL1/TNFRSF1B/IGKC/IGLC2	12	T2
GO:0001909	leukocyte mediated cytotoxicity	11/191	97/17913	6.8e-09	6.59e-07	5.18e-07	GZMM/LYST/CRTAM/SH2D1A/PTPRC/CD160/SLAMF7/HLA-F/XCL1/LAG3/SERPINB9	11	T2
GO:0019886	antigen processing and presentation of exogenous peptide antigen via MHC class II	11/191	97/17913	6.8e-09	6.59e-07	5.18e-07	HLA-DRB1/HLA-DPB1/CD74/HLA-DPA1/HLA-DQA1/HLA-DRA/HLA-DQA2/HLA-DQB1/HLA-DMA/LAG3/DYNC1H1	11	T2
GO:0002495	antigen processing and presentation of peptide antigen via MHC class II	11/191	100/17913	9.42e-09	8.61e-07	6.77e-07	HLA-DRB1/HLA-DPB1/CD74/HLA-DPA1/HLA-DQA1/HLA-DRA/HLA-DQA2/HLA-DQB1/HLA-DMA/LAG3/DYNC1H1	11	T2
GO:0002504	antigen processing and presentation of peptide or polysaccharide antigen via MHC class II	11/191	101/17913	1.05e-08	9.31e-07	7.31e-07	HLA-DRB1/HLA-DPB1/CD74/HLA-DPA1/HLA-DQA1/HLA-DRA/HLA-DQA2/HLA-DQB1/HLA-DMA/LAG3/DYNC1H1	11	T2
GO:0045619	regulation of lymphocyte differentiation	11/191	164/17913	1.51e-06	6.75e-05	5.31e-05	CD74/RUNX3/PTPRC/IFNG/TOX/ZFP36L2/LAG3/SMAD7/IRF1/TGFB1/ZBTB1	11	T2
GO:0030595	leukocyte chemotaxis	11/191	188/17913	5.69e-06	0.000204512	0.000160717	CCL5/CCL4/CD74/CXCR4/LYST/CCL3/CXCR3/XCL1/DUSP1/WNK1/PDE4B	11	T2
GO:0042113	B cell activation	11/191	215/17913	2.02e-05	0.000597326	0.000469412	CD74/PIK3R1/CD81/PTPRC/VCAM1/ITM2A/ZFP36L2/TGFB1/ZBTB7A/ITGA4/ZBTB1	11	T2
GO:0071559	response to transforming growth factor beta	11/191	239/17913	5.32e-05	0.00138294	0.00108679	RUNX3/UBC/FYN/ZFP36L2/XCL1/HSPA5/SMAD7/SKIL/TGFB1/ZBTB7A/ID1	11	T2
GO:0051924	regulation of calcium ion transport	11/191	244/17913	6.41e-05	0.00161412	0.00126847	CCL5/CCL4/CXCR4/FYN/CALM2/CCL3/CD84/F2R/XCL1/TGFB1/PDE4B	11	T2
GO:1903311	regulation of mRNA metabolic process	11/191	275/17913	0.000184278	0.00391796	0.00307895	SRSF7/DDX5/UBC/TENT5C/JMJD6/YBX3/ZFP36L2/CNOT6L/SRSF3/TENT4B/ZBTB7A	11	T2
GO:0070997	neuron death	11/191	347/17913	0.00128224	0.0182362	0.014331	CCL5/NR4A2/FYN/CCL3/REL/FASLG/F2R/HLA-F/HSPA5/TNFRSF1B/NR4A3	11	T2
GO:0051098	regulation of binding	11/191	368/17913	0.00203799	0.0253016	0.0198834	GZMA/CALM2/IFNG/PYHIN1/HSPA5/ARF6/TGFB1/ZBTB7A/HERPUD1/ITGA4/ID1	11	T2
GO:0030099	myeloid cell differentiation	11/191	411/17913	0.00471477	0.0456828	0.0359	CD74/PIK3R1/CD81/JMJD6/H3F3B/CCL3/IFNG/GNAS/TGFB1/ZBTB7A/NR4A3	11	T2
GO:0042326	negative regulation of phosphorylation	11/191	455/17913	0.00979482	0.0679901	0.0534304	PTPRC/CALM2/TERF2IP/PDCD4/DUSP1/MIDN/SMAD7/PTPN22/TGFB1/WNK1/MYADM	11	T2
GO:0016311	dephosphorylation	11/191	458/17913	0.010254	0.0702203	0.055183	DUSP2/PTPN7/PPP2R5C/PTPRC/CALM2/IFNG/DUSP5/DUSP1/PTPN22/TGFB1/WNK1	11	T2
GO:0006875	cellular metal ion homeostasis	11/191	467/17913	0.0117317	0.0761487	0.0598419	CCL5/PTPRC/FYN/CALM2/CCL3/FASLG/F2R/ATP1B3/XCL1/TGFB1/HERPUD1	11	T2
GO:1901652	response to peptide	11/191	491/17913	0.0164706	0.0963546	0.0757208	NR4A2/PIK3R1/FYN/VCAM1/SRSF5/JUND/PTPN22/TGFB1/ITGA4/NR4A3/ID1	11	T2
GO:0043410	positive regulation of MAPK cascade	11/191	499/17913	0.0183324	0.10238	0.0804559	CD74/ZEB2/CXCR4/CD81/PTPRC/UBC/CCL3/F2R/DUSP5/PTPN22/TGFB1	11	T2
GO:0048667	cell morphogenesis involved in neuron differentiation	11/191	500/17913	0.0185758	0.103378	0.0812402	ZEB2/CXCR4/NR4A2/PIK3R1/FYN/IFRD1/SKIL/B3GNT2/ITGA4/NR4A3/ID1	11	T2
GO:0002708	positive regulation of lymphocyte mediated immunity	10/191	91/17913	4.56e-08	3.4e-06	2.67e-06	CRTAM/SH2D1A/CD81/PTPRC/CD160/HLA-F/XCL1/LAG3/TGFB1/ZBTB1	10	T2
GO:0043484	regulation of RNA splicing	10/191	115/17913	4.24e-07	2.16e-05	1.69e-05	SRSF7/PIK3R1/DDX5/JMJD6/SRSF5/RBM38/HNRNPH1/FUS/SRSF3/ZBTB7A	10	T2
GO:0002705	positive regulation of leukocyte mediated immunity	10/191	117/17913	4.98e-07	2.49e-05	1.96e-05	CRTAM/SH2D1A/CD81/PTPRC/CD160/HLA-F/XCL1/LAG3/TGFB1/ZBTB1	10	T2
GO:1903038	negative regulation of leukocyte cell-cell adhesion	10/191	121/17913	6.82e-07	3.36e-05	2.64e-05	CD74/RUNX3/TIGIT/XCL1/LAG3/SMAD7/PTPN22/IRF1/TGFB1/WNK1	10	T2
GO:0051250	negative regulation of lymphocyte activation	10/191	132/17913	1.52e-06	6.75e-05	5.31e-05	CD74/RUNX3/TIGIT/HLA-F/XCL1/LAG3/SMAD7/PTPN22/IRF1/TGFB1	10	T2
GO:0002700	regulation of production of molecular mediator of immune response	10/191	138/17913	2.28e-06	9.85e-05	7.74e-05	CD74/CD81/PTPRC/CD160/HLA-F/XCL1/TNFRSF1B/SMAD7/TGFB1/NR4A3	10	T2
GO:0002819	regulation of adaptive immune response	10/191	150/17913	4.83e-06	0.00018383	0.000144463	CD81/PTPRC/CD160/HLA-F/XCL1/TNFRSF1B/SMAD7/IRF1/TGFB1/ZBTB1	10	T2
GO:0071560	cellular response to transforming growth factor beta stimulus	10/191	233/17913	0.000205945	0.00420677	0.00330591	UBC/FYN/ZFP36L2/XCL1/HSPA5/SMAD7/SKIL/TGFB1/ZBTB7A/ID1	10	T2
GO:0097193	intrinsic apoptotic signaling pathway	10/191	277/17913	0.000801792	0.0122178	0.0096014	CD74/PIK3R1/DDX5/YBX3/DDX3X/SELENOK/TNFRSF1B/SFPQ/SKIL/HERPUD1	10	T2
GO:0006913	nucleocytoplasmic transport	10/191	302/17913	0.00153578	0.0211831	0.0166469	SRSF7/SRSF2/PIK3R1/SRSF5/IFNG/ATXN1/SRSF3/TGFB1/RANBP2/KPNA2	10	T2
GO:0051169	nuclear transport	10/191	305/17913	0.00165212	0.0222134	0.0174565	SRSF7/SRSF2/PIK3R1/SRSF5/IFNG/ATXN1/SRSF3/TGFB1/RANBP2/KPNA2	10	T2
GO:0071214	cellular response to abiotic stimulus	10/191	310/17913	0.00186185	0.0238317	0.0187283	PIK3R1/YBX3/DDX3X/HSPA5/IRF1/SIPA1/TGFB1/H2AFX/N4BP1/ZBTB1	10	T2
GO:0104004	cellular response to environmental stimulus	10/191	310/17913	0.00186185	0.0238317	0.0187283	PIK3R1/YBX3/DDX3X/HSPA5/IRF1/SIPA1/TGFB1/H2AFX/N4BP1/ZBTB1	10	T2
GO:1901214	regulation of neuron death	10/191	313/17913	0.0019977	0.0252673	0.0198565	CCL5/NR4A2/FYN/CCL3/REL/FASLG/F2R/HLA-F/TNFRSF1B/NR4A3	10	T2
GO:0032103	positive regulation of response to external stimulus	10/191	315/17913	0.00209263	0.0256567	0.0201625	CCL5/CCL4/CD74/CXCR4/CD81/CCL3/PDCD4/XCL1/TGFB1/WNK1	10	T2
GO:0007178	transmembrane receptor protein serine/threonine kinase signaling pathway	10/191	323/17913	0.00250942	0.0298519	0.0234593	DDX5/UBC/SUB1/PDCD4/HSPA5/SMAD7/SKIL/TGFB1/ZBTB7A/ID1	10	T2
GO:0042176	regulation of protein catabolic process	10/191	354/17913	0.00479397	0.0456828	0.0359	RNF19A/CD81/FYN/OAZ1/IFNG/PYHIN1/TNFRSF1B/SMAD7/HERPUD1/N4BP1	10	T2
GO:1901653	cellular response to peptide	10/191	364/17913	0.0058055	0.0504968	0.0396832	NR4A2/PIK3R1/FYN/VCAM1/SRSF5/PTPN22/TGFB1/ITGA4/NR4A3/ID1	10	T2
GO:0006874	cellular calcium ion homeostasis	10/191	375/17913	0.00710329	0.0559901	0.0440001	CCL5/PTPRC/FYN/CALM2/CCL3/FASLG/F2R/XCL1/TGFB1/HERPUD1	10	T2
GO:1903532	positive regulation of secretion by cell	10/191	381/17913	0.00790026	0.0600495	0.0471902	CRTAM/CCL3/CD160/F2R/IFNG/HLA-F/SELENOK/ARF6/PTPN22/TGFB1	10	T2
GO:0055074	calcium ion homeostasis	10/191	388/17913	0.00891546	0.0651364	0.0511878	CCL5/PTPRC/FYN/CALM2/CCL3/FASLG/F2R/XCL1/TGFB1/HERPUD1	10	T2
GO:0072503	cellular divalent inorganic cation homeostasis	10/191	392/17913	0.00953893	0.0672347	0.0528368	CCL5/PTPRC/FYN/CALM2/CCL3/FASLG/F2R/XCL1/TGFB1/HERPUD1	10	T2
GO:0007409	axonogenesis	10/191	393/17913	0.00969989	0.0674775	0.0530275	ZEB2/CXCR4/NR4A2/PIK3R1/FYN/IFRD1/SKIL/B3GNT2/ITGA4/NR4A3	10	T2
GO:2001233	regulation of apoptotic signaling pathway	10/191	397/17913	0.0103646	0.0705675	0.0554559	CD74/NR4A2/PTPRC/FYN/YBX3/FASLG/DDX3X/SFPQ/SKIL/HERPUD1	10	T2
GO:0051052	regulation of DNA metabolic process	10/191	403/17913	0.0114261	0.0750495	0.058978	GZMA/PTPRC/TERF2IP/FUS/DUSP1/TENT4B/TSPYL2/TGFB1/H2AFX/KPNA2	10	T2
GO:0051047	positive regulation of secretion	10/191	409/17913	0.0125683	0.0787053	0.061851	CRTAM/CCL3/CD160/F2R/IFNG/HLA-F/SELENOK/ARF6/PTPN22/TGFB1	10	T2
GO:0072507	divalent inorganic cation homeostasis	10/191	412/17913	0.0131707	0.0816785	0.0641875	CCL5/PTPRC/FYN/CALM2/CCL3/FASLG/F2R/XCL1/TGFB1/HERPUD1	10	T2
GO:0001933	negative regulation of protein phosphorylation	10/191	416/17913	0.0140074	0.0857529	0.0673894	PTPRC/CALM2/TERF2IP/PDCD4/DUSP1/SMAD7/PTPN22/TGFB1/WNK1/MYADM	10	T2
GO:0022604	regulation of cell morphogenesis	10/191	430/17913	0.0172524	0.0977126	0.0767879	ZEB2/CXCR4/FYN/CCL3/IFRD1/ARHGAP18/SKIL/PLEKHO1/ID1/MYADM	10	T2
GO:0009314	response to radiation	10/191	435/17913	0.0185366	0.10334	0.0812102	PIK3R1/PTPRC/VCAM1/JUND/HSPA5/DUSP1/TGFB1/H2AFX/N4BP1/ZBTB1	10	T2
GO:0061564	axon development	10/191	438/17913	0.0193402	0.105253	0.0827134	ZEB2/CXCR4/NR4A2/PIK3R1/FYN/IFRD1/SKIL/B3GNT2/ITGA4/NR4A3	10	T2
GO:0050769	positive regulation of neurogenesis	10/191	455/17913	0.0243852	0.123469	0.0970291	ZEB2/CXCR4/FYN/CCL3/HSPA5/PRKCH/TNFRSF1B/SKIL/TGFB1/SRRT	10	T2
GO:0098542	defense response to other organism	10/191	481/17913	0.0338456	0.151689	0.119206	LYST/APOBEC3G/PTPRC/CD160/COTL1/IFNG/SELENOK/RNF125/IRF1/TGFB1	10	T2
GO:0042119	neutrophil activation	10/191	499/17913	0.0417423	0.176221	0.138484	CCL5/PTPRC/YPEL5/FABP5/COTL1/ARHGAP9/DDX3X/TNFRSF1B/SURF4/DYNC1H1	10	T2
GO:0031341	regulation of cell killing	9/191	82/17913	2.21e-07	1.26e-05	9.88e-06	CRTAM/SH2D1A/PTPRC/CD160/IFNG/HLA-F/XCL1/LAG3/SERPINB9	9	T2
GO:0002718	regulation of cytokine production involved in immune response	9/191	83/17913	2.46e-07	1.36e-05	1.07e-05	CD74/CD81/CD160/HLA-F/XCL1/TNFRSF1B/SMAD7/TGFB1/NR4A3	9	T2
GO:0002367	cytokine production involved in immune response	9/191	101/17913	1.32e-06	6.14e-05	4.83e-05	CD74/CD81/CD160/HLA-F/XCL1/TNFRSF1B/SMAD7/TGFB1/NR4A3	9	T2
GO:0050868	negative regulation of T cell activation	9/191	104/17913	1.69e-06	7.43e-05	5.84e-05	CD74/RUNX3/TIGIT/XCL1/LAG3/SMAD7/PTPN22/IRF1/TGFB1	9	T2
GO:0002687	positive regulation of leukocyte migration	9/191	121/17913	5.97e-06	0.000207505	0.000163069	CCL5/CCL4/CD74/CCL3/SELENOK/XCL1/TGFB1/WNK1/ITGA4	9	T2
GO:0050671	positive regulation of lymphocyte proliferation	9/191	125/17913	7.78e-06	0.000265017	0.000208265	CCL5/HLA-DPB1/CD74/HLA-DPA1/CD81/PTPRC/VCAM1/SELENOK/XCL1	9	T2
GO:0032946	positive regulation of mononuclear cell proliferation	9/191	126/17913	8.31e-06	0.00027983	0.000219906	CCL5/HLA-DPB1/CD74/HLA-DPA1/CD81/PTPRC/VCAM1/SELENOK/XCL1	9	T2
GO:0046631	alpha-beta T cell activation	9/191	133/17913	1.29e-05	0.000416274	0.000327131	RUNX3/CD81/PTPRC/CD160/EOMES/IFNG/XCL1/SMAD7/IRF1	9	T2
GO:0070665	positive regulation of leukocyte proliferation	9/191	134/17913	1.37e-05	0.000437767	0.000344022	CCL5/HLA-DPB1/CD74/HLA-DPA1/CD81/PTPRC/VCAM1/SELENOK/XCL1	9	T2
GO:0045580	regulation of T cell differentiation	9/191	139/17913	1.84e-05	0.000550181	0.000432362	CD74/RUNX3/PTPRC/IFNG/LAG3/SMAD7/IRF1/TGFB1/ZBTB1	9	T2
GO:0050920	regulation of chemotaxis	9/191	186/17913	0.00017611	0.00385995	0.00303336	CCL5/CCL4/CD74/CXCR4/CCL3/XCL1/DUSP1/TGFB1/WNK1	9	T2
GO:0050792	regulation of viral process	9/191	204/17913	0.000349467	0.00639026	0.00502182	CCL5/CCL4/CD74/CXCR4/DDX5/APOBEC3G/CCL3/DDX3X/KPNA2	9	T2
GO:0071216	cellular response to biotic stimulus	9/191	206/17913	0.000375331	0.00678565	0.00533254	CCL5/CCL3/PDCD4/HSPA5/TNFRSF1B/LITAF/PTPN22/TGFB1/PDE4B	9	T2
GO:0097191	extrinsic apoptotic signaling pathway	9/191	213/17913	0.00047861	0.00825878	0.0064902	PIK3R1/PTPRC/FYN/FASLG/DDX3X/IFNG/TNFRSF1B/SKIL/TGFB1	9	T2
GO:0043903	regulation of symbiosis, encompassing mutualism through parasitism	9/191	232/17913	0.000881595	0.0130607	0.0102638	CCL5/CCL4/CD74/CXCR4/DDX5/APOBEC3G/CCL3/DDX3X/KPNA2	9	T2
GO:0072659	protein localization to plasma membrane	9/191	237/17913	0.00102421	0.0149657	0.0117608	PIK3R1/CD81/GGA2/IFNG/ATP1B3/PRKCH/ARF6/TGFB1/MYADM	9	T2
GO:0043406	positive regulation of MAP kinase activity	9/191	250/17913	0.00148423	0.0205607	0.0161577	CD74/ZEB2/CXCR4/CD81/PTPRC/UBC/F2R/DUSP5/TGFB1	9	T2
GO:1990778	protein localization to cell periphery	9/191	276/17913	0.00289847	0.032452	0.0255026	PIK3R1/CD81/GGA2/IFNG/ATP1B3/PRKCH/ARF6/TGFB1/MYADM	9	T2
GO:0070588	calcium ion transmembrane transport	9/191	293/17913	0.00429085	0.0428858	0.033702	PTPRC/FYN/CALM2/CCL3/FASLG/F2R/XCL1/TGFB1/PDE4B	9	T2
GO:0032147	activation of protein kinase activity	9/191	303/17913	0.00532582	0.0491142	0.0385966	CCL5/CD74/CXCR4/CD81/PTPRC/UBC/F2R/DUSP5/WNK1	9	T2
GO:1904062	regulation of cation transmembrane transport	9/191	312/17913	0.00641402	0.05373	0.042224	FYN/CALM2/F2R/IFNG/UTRN/ATP1B3/XCL1/TGFB1/PDE4B	9	T2
GO:0006470	protein dephosphorylation	9/191	313/17913	0.00654476	0.053841	0.0423113	DUSP2/PTPN7/PPP2R5C/PTPRC/CALM2/DUSP5/DUSP1/PTPN22/TGFB1	9	T2
GO:1903829	positive regulation of cellular protein localization	9/191	318/17913	0.00722953	0.0568415	0.0446692	PIK3R1/CD81/FYN/OAZ1/IFNG/PYHIN1/PRKCH/ARF6/TGFB1	9	T2
GO:0071496	cellular response to external stimulus	9/191	320/17913	0.00751831	0.0585367	0.0460014	NR4A2/PTPRC/FYN/VCAM1/HSPA5/IRF1/SIPA1/TGFB1/ITGA4	9	T2
GO:0045862	positive regulation of proteolysis	9/191	333/17913	0.00961603	0.0674623	0.0530156	FYN/FASLG/F2R/DDX3X/IFNG/PYHIN1/TNFRSF1B/SMAD7/HERPUD1	9	T2
GO:0035690	cellular response to drug	9/191	362/17913	0.0158611	0.0939917	0.0738639	CXCR4/FYN/CD69/HSPA5/PTPN22/TGFB1/PDE4B/NR4A3/ID1	9	T2
GO:0006401	RNA catabolic process	9/191	368/17913	0.0174581	0.0987033	0.0775665	DDX5/UBC/TENT5C/YBX3/ZFP36L2/CNOT6L/TNFRSF1B/TENT4B/DDX6	9	T2
GO:0009896	positive regulation of catabolic process	9/191	392/17913	0.0250345	0.125172	0.0983674	CD81/OAZ1/IFNG/PYHIN1/ZFP36L2/CNOT6L/TNFRSF1B/SMAD7/HERPUD1	9	T2
GO:0043087	regulation of GTPase activity	9/191	410/17913	0.0320773	0.146849	0.115402	RGS1/F2R/ARHGAP9/ARAP2/ARHGAP18/SIPA1/RANBP2/WNK1/RASGEF1B	9	T2
GO:0051090	regulation of DNA-binding transcription factor activity	9/191	429/17913	0.0408968	0.173567	0.136399	UBC/EOMES/TERF2IP/XCL1/PRKCH/SMAD7/TGFB1/ZBTB7A/ID1	9	T2
GO:0062012	regulation of small molecule metabolic process	9/191	439/17913	0.0461428	0.186671	0.146697	FABP5/OAZ1/IDI1/IFNG/MIDN/TGFB1/ZBTB7A/RANBP2/NR4A3	9	T2
GO:0034765	regulation of ion transmembrane transport	9/191	453/17913	0.0542159	0.207525	0.163085	FYN/CALM2/F2R/IFNG/UTRN/ATP1B3/XCL1/TGFB1/PDE4B	9	T2
GO:0016049	cell growth	9/191	466/17913	0.062494	0.225203	0.176977	ZEB2/CXCR4/H3F3B/IFRD1/DDX3X/TSPYL2/SIPA1/TGFB1/ITGA4	9	T2
GO:0048871	multicellular organismal homeostasis	9/191	472/17913	0.0665731	0.235657	0.185192	CXCR4/METRNL/FABP5/F2R/GNAS/IGKC/NR4A3/DYNC1H1/ID1	9	T2
GO:0043312	neutrophil degranulation	9/191	485/17913	0.0759778	0.256195	0.201332	PTPRC/YPEL5/FABP5/COTL1/ARHGAP9/DDX3X/TNFRSF1B/SURF4/DYNC1H1	9	T2
GO:0002283	neutrophil activation involved in immune response	9/191	488/17913	0.0782589	0.259533	0.203955	PTPRC/YPEL5/FABP5/COTL1/ARHGAP9/DDX3X/TNFRSF1B/SURF4/DYNC1H1	9	T2
GO:0009991	response to extracellular stimulus	9/191	498/17913	0.0861632	0.275343	0.21638	NR4A2/SRSF2/PTPRC/FYN/VCAM1/HSPA5/SIPA1/TGFB1/ITGA4	9	T2
GO:0002446	neutrophil mediated immunity	9/191	499/17913	0.0869791	0.276948	0.217641	PTPRC/YPEL5/FABP5/COTL1/ARHGAP9/DDX3X/TNFRSF1B/SURF4/DYNC1H1	9	T2
GO:0009636	response to toxic substance	9/191	499/17913	0.0869791	0.276948	0.217641	CCL5/CCL4/NR4A2/FYN/VCAM1/CCL3/DUSP1/RANBP2/NR4A3	9	T2
GO:0031343	positive regulation of cell killing	8/191	50/17913	5.28e-08	3.84e-06	3.02e-06	CRTAM/SH2D1A/PTPRC/CD160/IFNG/HLA-F/XCL1/LAG3	8	T2
GO:0042267	natural killer cell mediated cytotoxicity	8/191	59/17913	2.01e-07	1.19e-05	9.36e-06	LYST/CRTAM/SH2D1A/CD160/SLAMF7/HLA-F/LAG3/SERPINB9	8	T2
GO:0002228	natural killer cell mediated immunity	8/191	63/17913	3.38e-07	1.81e-05	1.42e-05	LYST/CRTAM/SH2D1A/CD160/SLAMF7/HLA-F/LAG3/SERPINB9	8	T2
GO:0001910	regulation of leukocyte mediated cytotoxicity	8/191	64/17913	3.83e-07	1.98e-05	1.55e-05	CRTAM/SH2D1A/PTPRC/CD160/HLA-F/XCL1/LAG3/SERPINB9	8	T2
GO:0072676	lymphocyte migration	8/191	87/17913	4.11e-06	0.000164261	0.000129085	CCL5/CCL4/CCL3/CXCR3/SELENOK/XCL1/WNK1/ITGA4	8	T2
GO:0002456	T cell mediated immunity	8/191	88/17913	4.48e-06	0.000176845	0.000138974	GZMM/CD81/PTPRC/HLA-F/XCL1/TNFRSF1B/SMAD7/ZBTB1	8	T2
GO:0042102	positive regulation of T cell proliferation	8/191	90/17913	5.3e-06	0.000192773	0.000151492	CCL5/HLA-DPB1/HLA-DPA1/CD81/PTPRC/VCAM1/SELENOK/XCL1	8	T2
GO:0046634	regulation of alpha-beta T cell activation	8/191	90/17913	5.3e-06	0.000192773	0.000151492	RUNX3/CD81/PTPRC/CD160/IFNG/XCL1/SMAD7/IRF1	8	T2
GO:0002702	positive regulation of production of molecular mediator of immune response	8/191	93/17913	6.78e-06	0.000233219	0.000183276	CD74/CD81/PTPRC/CD160/HLA-F/XCL1/TGFB1/NR4A3	8	T2
GO:0030183	B cell differentiation	8/191	113/17913	2.84e-05	0.000826506	0.000649514	PIK3R1/PTPRC/VCAM1/ITM2A/ZFP36L2/ZBTB7A/ITGA4/ZBTB1	8	T2
GO:0002698	negative regulation of immune effector process	8/191	116/17913	3.43e-05	0.000989618	0.000777697	PTPRC/CD84/HLA-F/XCL1/RNF125/SMAD7/TGFB1/SERPINB9	8	T2
GO:0097553	calcium ion transmembrane import into cytosol	8/191	126/17913	6.2e-05	0.00158696	0.00124712	PTPRC/FYN/CALM2/CCL3/FASLG/F2R/XCL1/TGFB1	8	T2
GO:0050921	positive regulation of chemotaxis	8/191	130/17913	7.73e-05	0.00191801	0.00150728	CCL5/CCL4/CD74/CXCR4/CCL3/XCL1/TGFB1/WNK1	8	T2
GO:0002822	regulation of adaptive immune response based on somatic recombination of immune receptors built from immunoglobulin superfamily domains	8/191	135/17913	0.000100783	0.00238894	0.00187736	CD81/PTPRC/HLA-F/XCL1/TNFRSF1B/SMAD7/TGFB1/ZBTB1	8	T2
GO:0050777	negative regulation of immune response	8/191	143/17913	0.000150401	0.00334224	0.00262652	PTPRC/CD160/CD84/HLA-F/XCL1/SMAD7/TGFB1/SERPINB9	8	T2
GO:1902107	positive regulation of leukocyte differentiation	8/191	143/17913	0.000150401	0.00334224	0.00262652	CD74/RUNX3/PTPRC/IFNG/TOX/GNAS/TGFB1/ZBTB1	8	T2
GO:0060402	calcium ion transport into cytosol	8/191	145/17913	0.000165531	0.0036531	0.00287081	PTPRC/FYN/CALM2/CCL3/FASLG/F2R/XCL1/TGFB1	8	T2
GO:0060401	cytosolic calcium ion transport	8/191	157/17913	0.000284931	0.00545976	0.00429058	PTPRC/FYN/CALM2/CCL3/FASLG/F2R/XCL1/TGFB1	8	T2
GO:0002285	lymphocyte activation involved in immune response	8/191	158/17913	0.000297434	0.0056654	0.00445219	CD81/PTPRC/ITM2A/EOMES/IFNG/HLA-F/SMAD7/TGFB1	8	T2
GO:0035821	modification of morphology or physiology of other organism	8/191	160/17913	0.000323784	0.00602389	0.00473391	CCL5/CCL4/CALM2/CCL3/IFNG/TGFB1/SERPINB9/KPNA2	8	T2
GO:0016064	immunoglobulin mediated immune response	8/191	171/17913	0.000504969	0.00842763	0.0066229	CD74/HLA-DQB1/CD81/PTPRC/XCL1/TGFB1/IGKC/IGLC2	8	T2
GO:0019724	B cell mediated immunity	8/191	173/17913	0.000545369	0.00890399	0.00699725	CD74/HLA-DQB1/CD81/PTPRC/XCL1/TGFB1/IGKC/IGLC2	8	T2
GO:0071222	cellular response to lipopolysaccharide	8/191	176/17913	0.000610842	0.00962903	0.00756703	CCL5/CCL3/PDCD4/TNFRSF1B/LITAF/PTPN22/TGFB1/PDE4B	8	T2
GO:1903708	positive regulation of hemopoiesis	8/191	182/17913	0.000760846	0.0117053	0.0091987	CD74/RUNX3/PTPRC/IFNG/TOX/GNAS/TGFB1/ZBTB1	8	T2
GO:0071219	cellular response to molecule of bacterial origin	8/191	183/17913	0.000788504	0.0120728	0.00948747	CCL5/CCL3/PDCD4/TNFRSF1B/LITAF/PTPN22/TGFB1/PDE4B	8	T2
GO:0034504	protein localization to nucleus	8/191	223/17913	0.00275402	0.0320468	0.0251841	PIK3R1/FYN/IFNG/PYHIN1/TGFB1/ZBTB7A/RANBP2/KPNA2	8	T2
GO:0051048	negative regulation of secretion	8/191	226/17913	0.00298864	0.0330922	0.0260057	CD74/CD84/F2R/HLA-F/TNFRSF1B/MIDN/PTPN22/WNK1	8	T2
GO:0031348	negative regulation of defense response	8/191	237/17913	0.00398488	0.0406655	0.0319572	CST7/METRNL/PTPRC/PDCD4/HLA-F/TNFRSF1B/RNF125/SERPINB9	8	T2
GO:0048872	homeostasis of number of cells	8/191	241/17913	0.00440465	0.0435027	0.0341868	CD74/JMJD6/F2R/GPR174/SKIL/TGFB1/ZBTB7A/PDE4B	8	T2
GO:0045637	regulation of myeloid cell differentiation	8/191	250/17913	0.0054733	0.0497623	0.039106	CD74/PIK3R1/H3F3B/CCL3/IFNG/GNAS/TGFB1/NR4A3	8	T2
GO:0007249	I-kappaB kinase/NF-kappaB signaling	8/191	253/17913	0.00587025	0.0504968	0.0396832	CD74/UBC/FYN/REL/FASLG/F2R/TERF2IP/LITAF	8	T2
GO:0007204	positive regulation of cytosolic calcium ion concentration	8/191	255/17913	0.00614683	0.0523135	0.0411108	PTPRC/FYN/CALM2/CCL3/FASLG/F2R/XCL1/TGFB1	8	T2
GO:0050714	positive regulation of protein secretion	8/191	256/17913	0.00628878	0.0530979	0.0417273	CRTAM/CCL3/CD160/F2R/SELENOK/ARF6/PTPN22/TGFB1	8	T2
GO:0043270	positive regulation of ion transport	8/191	266/17913	0.00784909	0.0598026	0.0469962	CCL5/CCL4/CALM2/CCL3/F2R/IFNG/ATP1B3/XCL1	8	T2
GO:0071356	cellular response to tumor necrosis factor	8/191	266/17913	0.00784909	0.0598026	0.0469962	CCL5/TNFSF9/TNFRSF9/VCAM1/CCL3/YBX3/ZFP36L2/TNFRSF1B	8	T2
GO:0030522	intracellular receptor signaling pathway	8/191	272/17913	0.00891555	0.0651364	0.0511878	NR4A2/DDX5/UBC/FABP5/RNF125/PTPN22/ZBTB7A/NR4A3	8	T2
GO:0002793	positive regulation of peptide secretion	8/191	275/17913	0.00948776	0.0670217	0.0526694	CRTAM/CCL3/CD160/F2R/SELENOK/ARF6/PTPN22/TGFB1	8	T2
GO:0034612	response to tumor necrosis factor	8/191	284/17913	0.0113692	0.0750132	0.0589495	CCL5/TNFSF9/TNFRSF9/VCAM1/CCL3/YBX3/ZFP36L2/TNFRSF1B	8	T2
GO:0051235	maintenance of location	8/191	286/17913	0.0118223	0.0765542	0.0601605	PTPRC/CALM2/CCL3/FASLG/F2R/XCL1/HSPA5/TGFB1	8	T2
GO:0051480	regulation of cytosolic calcium ion concentration	8/191	289/17913	0.0125266	0.0785985	0.0617671	PTPRC/FYN/CALM2/CCL3/FASLG/F2R/XCL1/TGFB1	8	T2
GO:0070371	ERK1 and ERK2 cascade	8/191	289/17913	0.0125266	0.0785985	0.0617671	CD74/PTPRC/CCL3/F2R/ZFP36L2/DUSP1/PTPN22/TGFB1	8	T2
GO:0006909	phagocytosis	8/191	308/17913	0.017723	0.0998482	0.0784662	PIK3R1/PTPRC/FYN/JMJD6/WIPF1/TGFB1/IGKC/IGLC2	8	T2
GO:0006402	mRNA catabolic process	8/191	338/17913	0.0288355	0.136353	0.107153	DDX5/UBC/TENT5C/YBX3/ZFP36L2/CNOT6L/TENT4B/DDX6	8	T2
GO:0043547	positive regulation of GTPase activity	8/191	339/17913	0.0292733	0.137959	0.108416	RGS1/F2R/ARHGAP9/ARAP2/ARHGAP18/SIPA1/RANBP2/RASGEF1B	8	T2
GO:0031331	positive regulation of cellular catabolic process	8/191	341/17913	0.0301626	0.141235	0.110991	CD81/IFNG/PYHIN1/ZFP36L2/CNOT6L/TNFRSF1B/SMAD7/HERPUD1	8	T2
GO:0018108	peptidyl-tyrosine phosphorylation	8/191	346/17913	0.0324671	0.148209	0.116471	CCL5/CD74/CD81/PTPRC/FYN/MATK/IFNG/TGFB1	8	T2
GO:0018212	peptidyl-tyrosine modification	8/191	349/17913	0.0339061	0.151748	0.119252	CCL5/CD74/CD81/PTPRC/FYN/MATK/IFNG/TGFB1	8	T2
GO:0019932	second-messenger-mediated signaling	8/191	360/17913	0.039553	0.169892	0.133511	CCL4/CXCR4/PTPRC/VCAM1/CALM2/CCL3/SELENOK/GNAS	8	T2
GO:0030900	forebrain development	8/191	371/17913	0.0457981	0.186671	0.146697	ZEB2/CXCR4/NR4A2/AKNA/FYN/EOMES/H2AFX/NR4A3	8	T2
GO:0010498	proteasomal protein catabolic process	8/191	382/17913	0.0526598	0.204009	0.160321	ENC1/PPP2R5C/UBC/UBE2S/HSPA5/SMAD7/HERPUD1/N4BP1	8	T2
GO:0032386	regulation of intracellular transport	8/191	400/17913	0.0652544	0.231758	0.182128	PIK3R1/CD81/FYN/OAZ1/CD84/IFNG/TGFB1/DYNC1H1	8	T2
GO:0043254	regulation of protein complex assembly	8/191	409/17913	0.0721988	0.247098	0.194183	H3F3B/DDX3X/IFNG/ARHGAP18/CNOT6L/ARF6/TGFB1/MYADM	8	T2
GO:1901990	regulation of mitotic cell cycle phase transition	8/191	428/17913	0.0882888	0.279504	0.21965	TUBA4A/DDX3X/ZFP36L2/CNOT6L/DUSP1/OFD1/TGFB1/DYNC1H1	8	T2
GO:0003012	muscle system process	8/191	448/17913	0.107312	0.303785	0.238731	CXCR4/CALM2/F2R/UTRN/TNFRSF1B/SMAD7/PDE4B/NR4A3	8	T2
GO:0072594	establishment of protein localization to organelle	8/191	452/17913	0.11137	0.303822	0.23876	PIK3R1/UBC/IFNG/HSPA5/IL10RA/TGFB1/RANBP2/KPNA2	8	T2
GO:0010975	regulation of neuron projection development	8/191	458/17913	0.117612	0.308363	0.242329	ZEB2/CXCR4/FYN/IFRD1/HSPA5/ARF6/SKIL/ID1	8	T2
GO:1901987	regulation of cell cycle phase transition	8/191	464/17913	0.12404	0.313033	0.245999	TUBA4A/DDX3X/ZFP36L2/CNOT6L/DUSP1/OFD1/TGFB1/DYNC1H1	8	T2
GO:0050878	regulation of body fluid levels	8/191	499/17913	0.165059	0.349954	0.275013	PIK3R1/FYN/H3F3B/F2R/PRKCH/GNAS/IRF1/WNK1	8	T2
GO:2000403	positive regulation of lymphocyte migration	7/191	34/17913	5.92e-08	4.03e-06	3.17e-06	CCL5/CCL4/CCL3/SELENOK/XCL1/WNK1/ITGA4	7	T2
GO:0001912	positive regulation of leukocyte mediated cytotoxicity	7/191	40/17913	1.94e-07	1.17e-05	9.22e-06	CRTAM/SH2D1A/PTPRC/CD160/HLA-F/XCL1/LAG3	7	T2
GO:0072678	T cell migration	7/191	59/17913	3e-06	0.000127891	0.000100504	CCL5/CCL3/CXCR3/SELENOK/XCL1/WNK1/ITGA4	7	T2
GO:2000401	regulation of lymphocyte migration	7/191	60/17913	3.36e-06	0.00013976	0.000109831	CCL5/CCL4/CCL3/SELENOK/XCL1/WNK1/ITGA4	7	T2
GO:0002709	regulation of T cell mediated immunity	7/191	61/17913	3.76e-06	0.000154459	0.000121383	CD81/PTPRC/HLA-F/XCL1/TNFRSF1B/SMAD7/ZBTB1	7	T2
GO:0030101	natural killer cell activation	7/191	63/17913	4.69e-06	0.000181782	0.000142855	PTPRC/SLAMF7/HLA-F/TOX/IL21R/PTPN22/ZBTB1	7	T2
GO:0045621	positive regulation of lymphocyte differentiation	7/191	93/17913	6.14e-05	0.00158356	0.00124445	CD74/RUNX3/PTPRC/IFNG/TOX/TGFB1/ZBTB1	7	T2
GO:1902106	negative regulation of leukocyte differentiation	7/191	99/17913	9.14e-05	0.00219879	0.00172793	CD74/PIK3R1/RUNX3/CCL3/LAG3/SMAD7/IRF1	7	T2
GO:0002688	regulation of leukocyte chemotaxis	7/191	105/17913	0.000132424	0.00299616	0.00235454	CCL5/CCL4/CD74/CCL3/XCL1/DUSP1/WNK1	7	T2
GO:0032609	interferon-gamma production	7/191	105/17913	0.000132424	0.00299616	0.00235454	HLA-DPB1/HLA-DPA1/CD160/EOMES/XCL1/PTPN22/PDE4B	7	T2
GO:0051209	release of sequestered calcium ion into cytosol	7/191	112/17913	0.000198001	0.00411431	0.00323325	PTPRC/CALM2/CCL3/FASLG/F2R/XCL1/TGFB1	7	T2
GO:0051283	negative regulation of sequestering of calcium ion	7/191	112/17913	0.000198001	0.00411431	0.00323325	PTPRC/CALM2/CCL3/FASLG/F2R/XCL1/TGFB1	7	T2
GO:0051817	modification of morphology or physiology of other organism involved in symbiotic interaction	7/191	113/17913	0.0002092	0.00422411	0.00331954	CCL5/CCL4/CALM2/CCL3/TGFB1/SERPINB9/KPNA2	7	T2
GO:0051282	regulation of sequestering of calcium ion	7/191	114/17913	0.000220905	0.00441811	0.00347199	PTPRC/CALM2/CCL3/FASLG/F2R/XCL1/TGFB1	7	T2
GO:0051208	sequestering of calcium ion	7/191	117/17913	0.000259225	0.00506401	0.00397958	PTPRC/CALM2/CCL3/FASLG/F2R/XCL1/TGFB1	7	T2
GO:1905477	positive regulation of protein localization to membrane	7/191	120/17913	0.000302722	0.00573201	0.00450453	PIK3R1/CD81/FYN/IFNG/PRKCH/ARF6/TGFB1	7	T2
GO:0014065	phosphatidylinositol 3-kinase signaling	7/191	138/17913	0.00070233	0.0109632	0.00861549	CCL5/HCST/PIK3R1/PPP2R5C/FYN/CD160/F2R	7	T2
[truncated: 14,844 more rows]
