# Supplementary material for: Single-cell RNA sequencing of human femoral head in vivo
Source: Aging (Albany NY). 2021 Jun 10;13(11):15595–619. doi: 10.18632/aging.203124 (PMC8221309; doi:10.18632/aging.203124)
Supplement: Supplementary Table 11 [file aging-13-203124-s012.xlsx]

## Sheet: Sheet1
Supplementary Table 11. KEGG enrichment analyses of each T cells subtype.
ID	Description	GeneRatio	BgRatio	pvalue	p.adjust	qvalue	geneID	Count	Subtype
hsa04060	Cytokine-cytokine receptor interaction	8/39	294/8034	6.68e-05	0.00497848	0.00397434	IL7R/LTB/TNFRSF4/CD4/CCR7/TNFRSF25/CCR6/CD40LG	8	T1
hsa05206	MicroRNAs in cancer	7/39	310/8034	0.000631208	0.0171107	0.0136595	VIM/CDKN1A/IRS2/SOCS1/EZR/DDIT4/FOXP1	7	T1
hsa04668	TNF signaling pathway	5/39	112/8034	0.000189939	0.00939683	0.00750153	SOCS3/JUNB/TRADD/BIRC3/FOS	5	T1
hsa04935	Growth hormone synthesis, secretion and action	5/39	119/8034	0.000252264	0.00939683	0.00750153	SOCS3/JUNB/IRS2/SOCS1/FOS	5	T1
hsa04514	Cell adhesion molecules (CAMs)	5/39	148/8034	0.000689021	0.0171107	0.0136595	CD4/ITGB1/CD40LG/ICOS/CD2	5	T1
hsa05132	Salmonella infection	5/39	206/8034	0.00299011	0.0405024	0.0323333	S100A10/TRADD/AHNAK/BIRC3/FOS	5	T1
hsa05340	Primary immunodeficiency	4/39	38/8034	3.11e-05	0.00463169	0.0036975	IL7R/CD4/CD40LG/ICOS	4	T1
hsa04064	NF-kappa B signaling pathway	4/39	104/8034	0.00153882	0.0254761	0.0203377	LTB/TRADD/CD40LG/BIRC3	4	T1
hsa04660	T cell receptor signaling pathway	4/39	104/8034	0.00153882	0.0254761	0.0203377	CD4/CD40LG/ICOS/FOS	4	T1
hsa05145	Toxoplasmosis	4/39	112/8034	0.00202155	0.0301211	0.0240458	ITGB1/CD40LG/SOCS1/BIRC3	4	T1
hsa04380	Osteoclast differentiation	4/39	128/8034	0.00328468	0.0407848	0.0325587	SOCS3/JUNB/SOCS1/FOS	4	T1
hsa04210	Apoptosis	4/39	136/8034	0.00408295	0.0430746	0.0343867	LMNA/TRADD/BIRC3/FOS	4	T1
hsa04910	Insulin signaling pathway	4/39	137/8034	0.00419118	0.0430746	0.0343867	SOCS3/IRS2/SOCS1/PPP1CB	4	T1
hsa04630	JAK-STAT signaling pathway	4/39	162/8034	0.00756611	0.0663147	0.0529394	IL7R/SOCS3/CDKN1A/SOCS1	4	T1
hsa05130	Pathogenic Escherichia coli infection	4/39	192/8034	0.0135364	0.0960443	0.0766726	ITGB1/TRADD/EZR/FOS	4	T1
hsa05205	Proteoglycans in cancer	4/39	205/8034	0.0168536	0.104633	0.0835286	ITGB1/CDKN1A/EZR/PPP1CB	4	T1
hsa04151	PI3K-Akt signaling pathway	4/39	354/8034	0.0910483	0.246658	0.196908	IL7R/ITGB1/CDKN1A/DDIT4	4	T1
hsa05168	Herpes simplex virus 1 infection	4/39	491/8034	0.213292	0.393499	0.314132	SOCS3/TRADD/BIRC3/PPP1CB	4	T1
hsa04930	Type II diabetes mellitus	3/39	46/8034	0.00138985	0.0254761	0.0203377	SOCS3/IRS2/SOCS1	3	T1
hsa04920	Adipocytokine signaling pathway	3/39	69/8034	0.00444203	0.0430746	0.0343867	SOCS3/TRADD/IRS2	3	T1
hsa04917	Prolactin signaling pathway	3/39	70/8034	0.00462546	0.0430746	0.0343867	SOCS3/SOCS1/FOS	3	T1
hsa05235	PD-L1 expression and PD-1 checkpoint pathway in cancer	3/39	89/8034	0.00900719	0.0745595	0.0595212	CD4/FOS/BATF	3	T1
hsa05222	Small cell lung cancer	3/39	92/8034	0.00986129	0.0773333	0.0617355	ITGB1/CDKN1A/BIRC3	3	T1
hsa04640	Hematopoietic cell lineage	3/39	99/8034	0.0120334	0.0896485	0.0715668	IL7R/CD4/CD2	3	T1
hsa04931	Insulin resistance	3/39	108/8034	0.0152015	0.100931	0.0805737	SOCS3/IRS2/PPP1CB	3	T1
hsa04066	HIF-1 signaling pathway	3/39	109/8034	0.01558	0.100931	0.0805737	TIMP1/LDHB/CDKN1A	3	T1
hsa05135	Yersinia infection	3/39	130/8034	0.0247665	0.139416	0.111296	CD4/ITGB1/FOS	3	T1
hsa04068	FoxO signaling pathway	3/39	131/8034	0.0252633	0.139416	0.111296	IL7R/CDKN1A/IRS2	3	T1
hsa04120	Ubiquitin mediated proteolysis	3/39	140/8034	0.0299773	0.159522	0.127347	SOCS3/SOCS1/BIRC3	3	T1
hsa04932	Non-alcoholic fatty liver disease (NAFLD)	3/39	149/8034	0.035127	0.18048	0.144078	SOCS3/IRS2/NDUFV2	3	T1
hsa04921	Oxytocin signaling pathway	3/39	154/8034	0.0381748	0.1836	0.146569	CDKN1A/PPP1CB/FOS	3	T1
hsa05160	Hepatitis C	3/39	155/8034	0.0388002	0.1836	0.146569	SOCS3/CDKN1A/TRADD	3	T1
hsa04218	Cellular senescence	3/39	156/8034	0.039431	0.1836	0.146569	CDKN1A/ZFP36L2/PPP1CB	3	T1
hsa04217	Necroptosis	3/39	159/8034	0.0413547	0.186723	0.149062	FTH1/TRADD/BIRC3	3	T1
hsa05167	Kaposi sarcoma-associated herpesvirus infection	3/39	189/8034	0.0631346	0.235177	0.187742	CDKN1A/TRADD/FOS	3	T1
hsa04510	Focal adhesion	3/39	201/8034	0.0730877	0.235706	0.188165	ITGB1/BIRC3/PPP1CB	3	T1
hsa05169	Epstein-Barr virus infection	3/39	201/8034	0.0730877	0.235706	0.188165	VIM/CDKN1A/TRADD	3	T1
hsa05170	Human immunodeficiency virus 1 infection	3/39	212/8034	0.082797	0.237895	0.189913	CD4/TRADD/FOS	3	T1
hsa04810	Regulation of actin cytoskeleton	3/39	214/8034	0.0846204	0.237895	0.189913	ITGB1/EZR/PPP1CB	3	T1
hsa05166	Human T-cell leukemia virus 1 infection	3/39	219/8034	0.0892553	0.246279	0.196605	CD4/CDKN1A/FOS	3	T1
hsa04010	MAPK signaling pathway	3/39	294/8034	0.170072	0.367257	0.293183	TRADD/FOS/DUSP4	3	T1
hsa05165	Human papillomavirus infection	3/39	330/8034	0.214634	0.393499	0.314132	ITGB1/CDKN1A/TRADD	3	T1
hsa04672	Intestinal immune network for IgA production	2/39	49/8034	0.0233934	0.139416	0.111296	CD40LG/ICOS	2	T1
hsa05031	Amphetamine addiction	2/39	69/8034	0.0439295	0.192515	0.153685	PPP1CB/FOS	2	T1
hsa01524	Platinum drug resistance	2/39	73/8034	0.0486209	0.201236	0.160648	CDKN1A/BIRC3	2	T1
hsa04115	p53 signaling pathway	2/39	73/8034	0.0486209	0.201236	0.160648	CDKN1A/SESN3	2	T1
hsa05133	Pertussis	2/39	76/8034	0.0522544	0.204347	0.163131	ITGB1/FOS	2	T1
hsa05140	Leishmaniasis	2/39	77/8034	0.0534869	0.204347	0.163131	ITGB1/FOS	2	T1
hsa05412	Arrhythmogenic right ventricular cardiomyopathy (ARVC)	2/39	77/8034	0.0534869	0.204347	0.163131	LMNA/ITGB1	2	T1
hsa05210	Colorectal cancer	2/39	86/8034	0.0650324	0.235706	0.188165	CDKN1A/FOS	2	T1
hsa04211	Longevity regulating pathway	2/39	89/8034	0.0690531	0.235706	0.188165	IRS2/SESN3	2	T1
hsa05410	Hypertrophic cardiomyopathy (HCM)	2/39	90/8034	0.0704114	0.235706	0.188165	LMNA/ITGB1	2	T1
hsa04658	Th1 and Th2 cell differentiation	2/39	92/8034	0.0731545	0.235706	0.188165	CD4/FOS	2	T1
hsa05323	Rheumatoid arthritis	2/39	93/8034	0.0745391	0.235706	0.188165	LTB/FOS	2	T1
hsa04657	IL-17 signaling pathway	2/39	94/8034	0.0759322	0.235706	0.188165	TRADD/FOS	2	T1
hsa05414	Dilated cardiomyopathy (DCM)	2/39	96/8034	0.0787436	0.237895	0.189913	LMNA/ITGB1	2	T1
hsa01522	Endocrine resistance	2/39	98/8034	0.0815877	0.237895	0.189913	CDKN1A/FOS	2	T1
hsa04061	Viral protein interaction with cytokine and cytokine receptor	2/39	100/8034	0.0844638	0.237895	0.189913	CCR7/CCR6	2	T1
hsa04928	Parathyroid hormone synthesis, secretion and action	2/39	106/8034	0.0932754	0.247731	0.197765	CDKN1A/FOS	2	T1
hsa04659	Th17 cell differentiation	2/39	107/8034	0.0947696	0.247731	0.197765	CD4/FOS	2	T1
hsa04670	Leukocyte transendothelial migration	2/39	113/8034	0.10388	0.266863	0.213038	ITGB1/EZR	2	T1
hsa04611	Platelet activation	2/39	124/8034	0.121172	0.306011	0.24429	ITGB1/PPP1CB	2	T1
hsa04728	Dopaminergic synapse	2/39	132/8034	0.134171	0.333192	0.265989	PPP1CB/FOS	2	T1
hsa04140	Autophagy - animal	2/39	137/8034	0.142454	0.336316	0.268483	IRS2/DDIT4	2	T1
hsa05162	Measles	2/39	138/8034	0.144124	0.336316	0.268483	TRADD/FOS	2	T1
hsa05224	Breast cancer	2/39	147/8034	0.159339	0.35972	0.287166	CDKN1A/FOS	2	T1
hsa04390	Hippo signaling pathway	2/39	157/8034	0.176587	0.368179	0.293919	BIRC3/PPP1CB	2	T1
hsa04530	Tight junction	2/39	161/8034	0.183572	0.368179	0.293919	ITGB1/EZR	2	T1
hsa05161	Hepatitis B	2/39	162/8034	0.185325	0.368179	0.293919	CDKN1A/FOS	2	T1
hsa04022	cGMP-PKG signaling pathway	2/39	167/8034	0.194128	0.375651	0.299884	IRS2/PPP1CB	2	T1
hsa05164	Influenza A	2/39	170/8034	0.199438	0.380978	0.304136	SOCS3/TRADD	2	T1
hsa04062	Chemokine signaling pathway	2/39	189/8034	0.23344	0.414079	0.330561	CCR7/CCR6	2	T1
hsa05202	Transcriptional misregulation in cancer	2/39	192/8034	0.238853	0.414509	0.330904	CDKN1A/BIRC3	2	T1
hsa05203	Viral carcinogenesis	2/39	204/8034	0.26057	0.427836	0.341544	CDKN1A/TRADD	2	T1
hsa04024	cAMP signaling pathway	2/39	216/8034	0.282335	0.436056	0.348106	PPP1CB/FOS	2	T1
hsa05163	Human cytomegalovirus infection	2/39	225/8034	0.298644	0.436247	0.348258	CDKN1A/TRADD	2	T1
hsa05131	Shigellosis	2/39	242/8034	0.329313	0.451632	0.36054	ITGB1/TRADD	2	T1
hsa05010	Alzheimer disease	2/39	369/8034	0.540673	0.57957	0.462673	IRS2/NDUFV2	2	T1
hsa05310	Asthma	1/39	31/8034	0.140268	0.336316	0.268483	CD40LG	1	T1
hsa04215	Apoptosis - multiple species	1/39	32/8034	0.144458	0.336316	0.268483	BIRC3	1	T1
hsa00640	Propanoate metabolism	1/39	34/8034	0.152778	0.350213	0.279577	LDHB	1	T1
hsa05216	Thyroid cancer	1/39	37/8034	0.165109	0.367184	0.293124	CDKN1A	1	T1
hsa05330	Allograft rejection	1/39	38/8034	0.169181	0.367257	0.293183	CD40LG	1	T1
hsa00620	Pyruvate metabolism	1/39	39/8034	0.173233	0.368179	0.293919	LDHB	1	T1
hsa04216	Ferroptosis	1/39	41/8034	0.18128	0.368179	0.293919	FTH1	1	T1
hsa05219	Bladder cancer	1/39	41/8034	0.18128	0.368179	0.293919	CDKN1A	1	T1
hsa04962	Vasopressin-regulated water reabsorption	1/39	44/8034	0.193208	0.375651	0.299884	AQP3	1	T1
hsa00270	Cysteine and methionine metabolism	1/39	49/8034	0.212711	0.393499	0.314132	LDHB	1	T1
hsa05144	Malaria	1/39	50/8034	0.216557	0.393499	0.314132	CD40LG	1	T1
hsa05320	Autoimmune thyroid disease	1/39	53/8034	0.227983	0.40927	0.326722	CD40LG	1	T1
hsa04923	Regulation of lipolysis in adipocytes	1/39	56/8034	0.239247	0.414509	0.330904	IRS2	1	T1
hsa05213	Endometrial cancer	1/39	58/8034	0.246667	0.422452	0.337245	CDKN1A	1	T1
hsa04978	Mineral absorption	1/39	59/8034	0.25035	0.423888	0.338392	FTH1	1	T1
hsa05416	Viral myocarditis	1/39	60/8034	0.254016	0.425263	0.339489	CD40LG	1	T1
hsa04213	Longevity regulating pathway - multiple species	1/39	62/8034	0.261296	0.427836	0.341544	IRS2	1	T1
hsa05217	Basal cell carcinoma	1/39	63/8034	0.26491	0.429039	0.342503	CDKN1A	1	T1
hsa00010	Glycolysis / Gluconeogenesis	1/39	67/8034	0.279194	0.436056	0.348106	LDHB	1	T1
hsa04720	Long-term potentiation	1/39	67/8034	0.279194	0.436056	0.348106	PPP1CB	1	T1
hsa05223	Non-small cell lung cancer	1/39	68/8034	0.282722	0.436056	0.348106	CDKN1A	1	T1
hsa05211	Renal cell carcinoma	1/39	69/8034	0.286234	0.436056	0.348106	CDKN1A	1	T1
hsa04622	RIG-I-like receptor signaling pathway	1/39	70/8034	0.289729	0.436056	0.348106	TRADD	1	T1
hsa05230	Central carbon metabolism in cancer	1/39	70/8034	0.289729	0.436056	0.348106	LDHB	1	T1
hsa05218	Melanoma	1/39	72/8034	0.296668	0.436247	0.348258	CDKN1A	1	T1
hsa05100	Bacterial invasion of epithelial cells	1/39	73/8034	0.300114	0.436247	0.348258	ITGB1	1	T1
hsa05214	Glioma	1/39	75/8034	0.306955	0.436247	0.348258	CDKN1A	1	T1
hsa04971	Gastric acid secretion	1/39	76/8034	0.310351	0.436247	0.348258	EZR	1	T1
hsa05212	Pancreatic cancer	1/39	76/8034	0.310351	0.436247	0.348258	CDKN1A	1	T1
hsa05220	Chronic myeloid leukemia	1/39	76/8034	0.310351	0.436247	0.348258	CDKN1A	1	T1
hsa04612	Antigen processing and presentation	1/39	78/8034	0.317094	0.441561	0.3525	CD4	1	T1
hsa04662	B cell receptor signaling pathway	1/39	82/8034	0.330389	0.451632	0.36054	FOS	1	T1
hsa04012	ErbB signaling pathway	1/39	85/8034	0.340194	0.460808	0.367865	CDKN1A	1	T1
hsa04512	ECM-receptor interaction	1/39	88/8034	0.349859	0.469631	0.374908	ITGB1	1	T1
hsa03015	mRNA surveillance pathway	1/39	91/8034	0.359386	0.478112	0.381679	PPP1CB	1	T1
hsa04713	Circadian entrainment	1/39	97/8034	0.378034	0.493761	0.394171	FOS	1	T1
hsa05215	Prostate cancer	1/39	97/8034	0.378034	0.493761	0.394171	CDKN1A	1	T1
hsa05231	Choline metabolism in cancer	1/39	98/8034	0.38109	0.493761	0.394171	FOS	1	T1
hsa04750	Inflammatory mediator regulation of TRP channels	1/39	100/8034	0.387159	0.497299	0.396996	PPP1CB	1	T1
hsa05142	Chagas disease (American trypanosomiasis)	1/39	102/8034	0.393169	0.500703	0.399713	FOS	1	T1
hsa04620	Toll-like receptor signaling pathway	1/39	104/8034	0.399122	0.503977	0.402327	FOS	1	T1
hsa04922	Glucagon signaling pathway	1/39	106/8034	0.405019	0.507124	0.404839	LDHB	1	T1
hsa04725	Cholinergic synapse	1/39	113/8034	0.425214	0.527974	0.421484	FOS	1	T1
hsa04071	Sphingolipid signaling pathway	1/39	119/8034	0.441992	0.543168	0.433613	TRADD	1	T1
hsa04152	AMPK signaling pathway	1/39	120/8034	0.444742	0.543168	0.433613	IRS2	1	T1
hsa04110	Cell cycle	1/39	124/8034	0.455608	0.551916	0.440597	CDKN1A	1	T1
hsa04114	Oocyte meiosis	1/39	128/8034	0.466267	0.554493	0.442654	PPP1CB	1	T1
hsa04142	Lysosome	1/39	128/8034	0.466267	0.554493	0.442654	AP3M2	1	T1
hsa04926	Relaxin signaling pathway	1/39	129/8034	0.4689	0.554493	0.442654	FOS	1	T1
hsa00190	Oxidative phosphorylation	1/39	133/8034	0.479306	0.562335	0.448915	NDUFV2	1	T1
hsa04270	Vascular smooth muscle contraction	1/39	135/8034	0.484434	0.56248	0.44903	PPP1CB	1	T1
hsa05322	Systemic lupus erythematosus	1/39	136/8034	0.486979	0.56248	0.44903	CD40LG	1	T1
hsa04915	Estrogen signaling pathway	1/39	138/8034	0.492034	0.562495	0.449042	FOS	1	T1
hsa05418	Fluid shear stress and atherosclerosis	1/39	139/8034	0.494543	0.562495	0.449042	FOS	1	T1
hsa04723	Retrograde endocannabinoid signaling	1/39	148/8034	0.516587	0.577072	0.460679	NDUFV2	1	T1
hsa04261	Adrenergic signaling in cardiomyocytes	1/39	149/8034	0.518977	0.577072	0.460679	PPP1CB	1	T1
hsa05226	Gastric cancer	1/39	149/8034	0.518977	0.577072	0.460679	CDKN1A	1	T1
hsa04145	Phagosome	1/39	152/8034	0.526081	0.57957	0.462673	ITGB1	1	T1
hsa04150	mTOR signaling pathway	1/39	155/8034	0.533081	0.57957	0.462673	DDIT4	1	T1
hsa04934	Cushing syndrome	1/39	155/8034	0.533081	0.57957	0.462673	CDKN1A	1	T1
hsa03010	Ribosome	1/39	158/8034	0.539982	0.57957	0.462673	RPLP0	1	T1
hsa05225	Hepatocellular carcinoma	1/39	168/8034	0.562272	0.598418	0.47772	CDKN1A	1	T1
hsa05152	Tuberculosis	1/39	180/8034	0.587634	0.614424	0.490497	TRADD	1	T1
hsa04360	Axon guidance	1/39	181/8034	0.589682	0.614424	0.490497	ITGB1	1	T1
hsa04621	NOD-like receptor signaling pathway	1/39	181/8034	0.589682	0.614424	0.490497	BIRC3	1	T1
hsa05034	Alcoholism	1/39	187/8034	0.601761	0.622656	0.497069	PPP1CB	1	T1
hsa04015	Rap1 signaling pathway	1/39	210/8034	0.644937	0.662729	0.529059	ITGB1	1	T1
hsa04714	Thermogenesis	1/39	231/8034	0.680352	0.694332	0.554288	NDUFV2	1	T1
hsa05012	Parkinson disease	1/39	249/8034	0.707949	0.71758	0.572848	NDUFV2	1	T1
hsa05016	Huntington disease	1/39	306/8034	0.780879	0.786155	0.627591	NDUFV2	1	T1
hsa04080	Neuroactive ligand-receptor interaction	1/39	340/8034	0.815576	0.815576	0.651078	NR3C1	1	T1
hsa05168	Herpes simplex virus 1 infection	23/119	491/8034	6.36e-07	6.08e-06	4.98e-06	CCL5/HLA-DRB1/HLA-DPB1/CD74/HLA-A/HLA-DPA1/SRSF7/HLA-DQA1/SRSF2/HLA-C/PIK3R1/HLA-DRA/HLA-DQA2/HLA-B/HLA-DQB1/HLA-DMA/ZNF331/SRSF5/FASLG/IFNG/HLA-F/SRSF3/IFNGR1	23	T2
hsa04060	Cytokine-cytokine receptor interaction	20/119	294/8034	9.03e-09	1.42e-07	1.16e-07	CCL5/CCL4/CCL4L2/CXCR4/XCL2/TNFSF9/IL32/CCL3L1/TNFRSF9/CCL3/FASLG/CXCR3/IFNG/XCL1/IL21R/TNFRSF1B/IL10RA/TGFB1/CXCR6/IFNGR1	20	T2
hsa04514	Cell adhesion molecules (CAMs)	18/119	148/8034	3.98e-12	1.25e-10	1.02e-10	HLA-DRB1/CD8A/HLA-DPB1/CD8B/HLA-A/HLA-DPA1/HLA-DQA1/HLA-C/HLA-DRA/HLA-DQA2/HLA-B/HLA-DQB1/HLA-DMA/PTPRC/TIGIT/VCAM1/HLA-F/ITGA4	18	T2
hsa04612	Antigen processing and presentation	17/119	78/8034	7.3e-16	4.01e-14	3.28e-14	HLA-DRB1/CD8A/HLA-DPB1/CD74/CD8B/HLA-A/HLA-DPA1/HLA-DQA1/HLA-C/HLA-DRA/HLA-DQA2/HLA-B/HLA-DQB1/HLA-DMA/IFNG/HLA-F/HSPA5	17	T2
hsa05169	Epstein-Barr virus infection	15/119	201/8034	2.34e-07	2.46e-06	2.01e-06	HLA-DRB1/HLA-DPB1/HLA-A/HLA-DPA1/HLA-DQA1/HLA-C/PIK3R1/HLA-DRA/HLA-DQA2/HLA-B/RUNX3/HLA-DQB1/HLA-DMA/CD3D/HLA-F	15	T2
hsa05166	Human T-cell leukemia virus 1 infection	15/119	219/8034	7.1e-07	6.51e-06	5.33e-06	HLA-DRB1/HLA-DPB1/HLA-A/HLA-DPA1/HLA-DQA1/HLA-C/PIK3R1/HLA-DRA/HLA-DQA2/HLA-B/HLA-DQB1/HLA-DMA/CD3D/HLA-F/TGFB1	15	T2
hsa05163	Human cytomegalovirus infection	15/119	225/8034	1e-06	8.82e-06	7.22e-06	CCL5/CCL4/CCL4L2/HLA-A/CXCR4/HLA-C/PIK3R1/HLA-B/CCL3L1/CALM2/CCL3/FASLG/HLA-F/GNAS/IL10RA	15	T2
hsa05330	Allograft rejection	14/119	38/8034	8.04e-17	1.77e-14	1.45e-14	HLA-DRB1/HLA-DPB1/HLA-A/HLA-DPA1/HLA-DQA1/HLA-C/HLA-DRA/HLA-DQA2/HLA-B/HLA-DQB1/HLA-DMA/FASLG/IFNG/HLA-F	14	T2
hsa05332	Graft-versus-host disease	14/119	42/8034	4.18e-16	4.01e-14	3.28e-14	HLA-DRB1/HLA-DPB1/HLA-A/HLA-DPA1/HLA-DQA1/HLA-C/HLA-DRA/HLA-DQA2/HLA-B/HLA-DQB1/HLA-DMA/FASLG/IFNG/HLA-F	14	T2
hsa04940	Type I diabetes mellitus	14/119	43/8034	6.13e-16	4.01e-14	3.28e-14	HLA-DRB1/HLA-DPB1/HLA-A/HLA-DPA1/HLA-DQA1/HLA-C/HLA-DRA/HLA-DQA2/HLA-B/HLA-DQB1/HLA-DMA/FASLG/IFNG/HLA-F	14	T2
hsa04145	Phagosome	14/119	152/8034	4.42e-08	5.72e-07	4.68e-07	HLA-DRB1/TUBA4A/HLA-DPB1/HLA-A/HLA-DPA1/HLA-DQA1/HLA-C/HLA-DRA/HLA-DQA2/HLA-B/HLA-DQB1/HLA-DMA/HLA-F/DYNC1H1	14	T2
hsa05164	Influenza A	14/119	170/8034	1.81e-07	2.1e-06	1.72e-06	CCL5/HLA-DRB1/HLA-DPB1/HLA-DPA1/HLA-DQA1/PIK3R1/HLA-DRA/HLA-DQA2/HLA-DQB1/HLA-DMA/FASLG/IFNG/KPNA2/IFNGR1	14	T2
hsa05152	Tuberculosis	14/119	180/8034	3.68e-07	3.68e-06	3.01e-06	HLA-DRB1/HLA-DPB1/CD74/HLA-DPA1/HLA-DQA1/HLA-DRA/HLA-DQA2/HLA-DQB1/HLA-DMA/CALM2/IFNG/IL10RA/TGFB1/IFNGR1	14	T2
hsa05320	Autoimmune thyroid disease	13/119	53/8034	4.34e-13	1.91e-11	1.56e-11	HLA-DRB1/HLA-DPB1/HLA-A/HLA-DPA1/HLA-DQA1/HLA-C/HLA-DRA/HLA-DQA2/HLA-B/HLA-DQB1/HLA-DMA/FASLG/HLA-F	13	T2
hsa05416	Viral myocarditis	13/119	60/8034	2.44e-12	8.96e-11	7.33e-11	HLA-DRB1/HLA-DPB1/HLA-A/HLA-DPA1/HLA-DQA1/HLA-C/HLA-DRA/HLA-DQA2/HLA-B/HLA-DQB1/HLA-DMA/FYN/HLA-F	13	T2
hsa05323	Rheumatoid arthritis	13/119	93/8034	8.16e-10	1.79e-08	1.47e-08	CCL5/HLA-DRB1/HLA-DPB1/HLA-DPA1/HLA-DQA1/HLA-DRA/HLA-DQA2/HLA-DQB1/CCL3L1/HLA-DMA/CCL3/IFNG/TGFB1	13	T2
hsa04659	Th17 cell differentiation	13/119	107/8034	4.78e-09	8.77e-08	7.18e-08	HLA-DRB1/HLA-DPB1/HLA-DPA1/HLA-DQA1/HLA-DRA/HLA-DQA2/HLA-DQB1/HLA-DMA/CD3D/IFNG/IL21R/TGFB1/IFNGR1	13	T2
hsa05321	Inflammatory bowel disease (IBD)	12/119	65/8034	1.32e-10	3.23e-09	2.65e-09	HLA-DRB1/HLA-DPB1/HLA-DPA1/HLA-DQA1/HLA-DRA/HLA-DQA2/HLA-DQB1/HLA-DMA/IFNG/IL21R/TGFB1/IFNGR1	12	T2
hsa05140	Leishmaniasis	12/119	77/8034	1.04e-09	2.08e-08	1.7e-08	HLA-DRB1/HLA-DPB1/HLA-DPA1/HLA-DQA1/HLA-DRA/HLA-DQA2/HLA-DQB1/HLA-DMA/IFNG/TGFB1/ITGA4/IFNGR1	12	T2
hsa04658	Th1 and Th2 cell differentiation	12/119	92/8034	8.52e-09	1.42e-07	1.16e-07	HLA-DRB1/HLA-DPB1/HLA-DPA1/HLA-DQA1/HLA-DRA/HLA-DQA2/RUNX3/HLA-DQB1/HLA-DMA/CD3D/IFNG/IFNGR1	12	T2
hsa04640	Hematopoietic cell lineage	12/119	99/8034	1.99e-08	2.74e-07	2.24e-07	HLA-DRB1/CD8A/HLA-DPB1/CD8B/HLA-DPA1/HLA-DQA1/HLA-DRA/HLA-DQA2/HLA-DQB1/HLA-DMA/CD3D/ITGA4	12	T2
hsa05145	Toxoplasmosis	12/119	112/8034	8.09e-08	9.89e-07	8.09e-07	HLA-DRB1/HLA-DPB1/HLA-DPA1/HLA-DQA1/HLA-DRA/HLA-DQA2/HLA-DQB1/HLA-DMA/IFNG/IL10RA/TGFB1/IFNGR1	12	T2
hsa04672	Intestinal immune network for IgA production	11/119	49/8034	8.56e-11	2.35e-09	1.93e-09	HLA-DRB1/HLA-DPB1/HLA-DPA1/CXCR4/HLA-DQA1/HLA-DRA/HLA-DQA2/HLA-DQB1/HLA-DMA/TGFB1/ITGA4	11	T2
hsa04061	Viral protein interaction with cytokine and cytokine receptor	11/119	100/8034	2.21e-07	2.43e-06	1.99e-06	CCL5/CCL4/CCL4L2/CXCR4/XCL2/CCL3L1/CCL3/CXCR3/XCL1/TNFRSF1B/IL10RA	11	T2
hsa05322	Systemic lupus erythematosus	11/119	136/8034	4.85e-06	3.95e-05	3.23e-05	HLA-DRB1/HLA-DPB1/HLA-DPA1/HLA-DQA1/HLA-DRA/HLA-DQA2/HLA-DQB1/HLA-DMA/H3F3B/IFNG/H2AFX	11	T2
hsa04062	Chemokine signaling pathway	11/119	189/8034	0.00010538	0.000772786	0.00063228	CCL5/CCL4/CCL4L2/CXCR4/XCL2/PIK3R1/CCL3L1/CCL3/CXCR3/XCL1/CXCR6	11	T2
hsa05170	Human immunodeficiency virus 1 infection	11/119	212/8034	0.000289312	0.00205318	0.00167988	HLA-A/CXCR4/HLA-C/PIK3R1/HLA-B/APOBEC3G/CD3D/CALM2/FASLG/HLA-F/TNFRSF1B	11	T2
hsa05142	Chagas disease (American trypanosomiasis)	10/119	102/8034	2.35e-06	1.99e-05	1.63e-05	CCL5/PIK3R1/CCL3L1/CD3D/CCL3/FASLG/IFNG/GNAS/TGFB1/IFNGR1	10	T2
hsa04650	Natural killer cell mediated cytotoxicity	10/119	131/8034	2.22e-05	0.000174615	0.000142867	HLA-A/HCST/HLA-C/PIK3R1/SH2D1A/HLA-B/FYN/FASLG/IFNG/IFNGR1	10	T2
hsa05167	Kaposi sarcoma-associated herpesvirus infection	10/119	189/8034	0.000471954	0.00324469	0.00265474	HLA-A/HLA-C/PIK3R1/HLA-B/UBC/CALM2/GABARAPL1/HLA-F/CLEC2B/IFNGR1	10	T2
hsa05165	Human papillomavirus infection	10/119	330/8034	0.0242042	0.123835	0.10132	HLA-A/HLA-C/PIK3R1/HLA-B/PPP2R5C/FASLG/HLA-F/GNAS/IRF1/ITGA4	10	T2
hsa05310	Asthma	8/119	31/8034	1.09e-08	1.59e-07	1.3e-07	HLA-DRB1/HLA-DPB1/HLA-DPA1/HLA-DQA1/HLA-DRA/HLA-DQA2/HLA-DQB1/HLA-DMA	8	T2
hsa05150	Staphylococcus aureus infection	8/119	96/8034	8.18e-05	0.000620875	0.000507989	HLA-DRB1/HLA-DPB1/HLA-DPA1/HLA-DQA1/HLA-DRA/HLA-DQA2/HLA-DQB1/HLA-DMA	8	T2
hsa04218	Cellular senescence	8/119	156/8034	0.0021428	0.0138652	0.0113442	HLA-A/HLA-C/PIK3R1/HLA-B/CALM2/HLA-F/ZFP36L2/TGFB1	8	T2
hsa04144	Endocytosis	8/119	248/8034	0.0305902	0.143188	0.117154	HLA-A/CXCR4/HLA-C/HLA-B/ARAP2/WIPF1/HLA-F/ARF6	8	T2
hsa04660	T cell receptor signaling pathway	7/119	104/8034	0.00085051	0.00567007	0.00463915	CD8A/CD8B/PIK3R1/PTPRC/FYN/CD3D/IFNG	7	T2
hsa05203	Viral carcinogenesis	7/119	204/8034	0.0315497	0.144603	0.118312	HLA-A/HLA-C/PIK3R1/HLA-B/REL/DDX3X/HLA-F	7	T2
hsa04010	MAPK signaling pathway	7/119	294/8034	0.145502	0.438498	0.358771	DUSP2/PTPN7/FASLG/JUND/DUSP5/DUSP1/TGFB1	7	T2
hsa04620	Toll-like receptor signaling pathway	6/119	104/8034	0.00434157	0.0265318	0.0217079	CCL5/CCL4/CCL4L2/PIK3R1/CCL3L1/CCL3	6	T2
hsa04380	Osteoclast differentiation	6/119	128/8034	0.0116664	0.0675424	0.055262	PIK3R1/FYN/JUND/IFNG/TGFB1/IFNGR1	6	T2
hsa05135	Yersinia infection	6/119	130/8034	0.0125271	0.0706658	0.0578175	CD8A/CD8B/PIK3R1/WIPF1/ARF6/ITGA4	6	T2
hsa05130	Pathogenic Escherichia coli infection	6/119	192/8034	0.0652093	0.26533	0.217088	TUBA4A/FYN/FASLG/F2R/WIPF1/ARF6	6	T2
hsa04015	Rap1 signaling pathway	6/119	210/8034	0.0912189	0.327344	0.267827	PIK3R1/CALM2/F2R/GNAS/SIPA1/ID1	6	T2
hsa04024	cAMP signaling pathway	6/119	216/8034	0.100986	0.340453	0.278552	PIK3R1/CALM2/F2R/ATP1B3/GNAS/PDE4B	6	T2
hsa05131	Shigellosis	6/119	242/8034	0.149283	0.443815	0.363121	CCL5/PIK3R1/UBC/H3F3B/GABARAPL1/ARF6	6	T2
hsa05012	Parkinson disease	6/119	249/8034	0.163825	0.450518	0.368606	TUBA4A/UBC/CALM2/HSPA5/GNAS/DUSP1	6	T2
hsa05146	Amoebiasis	5/119	102/8034	0.0174719	0.0915196	0.0748797	PIK3R1/IFNG/GNAS/TGFB1/SERPINB9	5	T2
hsa04668	TNF signaling pathway	5/119	112/8034	0.0250713	0.125356	0.102564	CCL5/PIK3R1/VCAM1/TNFRSF1B/IRF1	5	T2
hsa04670	Leukocyte transendothelial migration	5/119	113/8034	0.0259313	0.126775	0.103725	CXCR4/PIK3R1/VCAM1/SIPA1/ITGA4	5	T2
hsa05418	Fluid shear stress and atherosclerosis	5/119	139/8034	0.0551279	0.237807	0.194569	PIK3R1/VCAM1/CALM2/IFNG/DUSP1	5	T2
hsa04072	Phospholipase D signaling pathway	5/119	148/8034	0.0683961	0.268699	0.219844	PIK3R1/FYN/F2R/GNAS/ARF6	5	T2
hsa03040	Spliceosome	5/119	149/8034	0.0699711	0.270064	0.220962	SRSF7/SRSF2/DDX5/SRSF5/SRSF3	5	T2
hsa04630	JAK-STAT signaling pathway	5/119	162/8034	0.0922516	0.327344	0.267827	PIK3R1/IFNG/IL21R/IL10RA/IFNGR1	5	T2
hsa05202	Transcriptional misregulation in cancer	5/119	192/8034	0.155583	0.448686	0.367106	DDX5/H3F3B/REL/FUS/NR4A3	5	T2
hsa05205	Proteoglycans in cancer	5/119	205/8034	0.187493	0.482665	0.394907	PIK3R1/DDX5/FASLG/PDCD4/TGFB1	5	T2
hsa04014	Ras signaling pathway	5/119	232/8034	0.26019	0.587016	0.480286	PIK3R1/CALM2/REL/FASLG/ARF6	5	T2
hsa04151	PI3K-Akt signaling pathway	5/119	354/8034	0.607335	0.750638	0.614159	PIK3R1/PPP2R5C/FASLG/F2R/ITGA4	5	T2
hsa05340	Primary immunodeficiency	4/119	38/8034	0.0022897	0.0143924	0.0117756	CD8A/CD8B/PTPRC/CD3D	4	T2
hsa05144	Malaria	4/119	50/8034	0.00623516	0.0370739	0.0303332	CD81/VCAM1/IFNG/TGFB1	4	T2
hsa03018	RNA degradation	4/119	79/8034	0.0293734	0.140481	0.114939	CNOT6L/TENT4B/BTG3/DDX6	4	T2
hsa05235	PD-L1 expression and PD-1 checkpoint pathway in cancer	4/119	89/8034	0.0427098	0.191758	0.156893	PIK3R1/CD3D/IFNG/IFNGR1	4	T2
hsa04350	TGF-beta signaling pathway	4/119	94/8034	0.0504694	0.222065	0.18169	IFNG/SMAD7/TGFB1/ID1	4	T2
hsa04925	Aldosterone synthesis and secretion	4/119	98/8034	0.0571989	0.241995	0.197996	NR4A2/CALM2/ATP1B3/GNAS	4	T2
hsa04750	Inflammatory mediator regulation of TRP channels	4/119	100/8034	0.0607362	0.252112	0.206274	PIK3R1/CALM2/PRKCH/GNAS	4	T2
hsa04928	Parathyroid hormone synthesis, secretion and action	4/119	106/8034	0.0720281	0.27321	0.223536	NR4A2/JUND/GNAS/PDE4B	4	T2
hsa04066	HIF-1 signaling pathway	4/119	109/8034	0.0780501	0.291034	0.238119	PIK3R1/IFNG/LDHA/IFNGR1	4	T2
hsa04722	Neurotrophin signaling pathway	4/119	119/8034	0.0998641	0.340453	0.278552	PIK3R1/CALM2/FASLG/MATK	4	T2
hsa04611	Platelet activation	4/119	124/8034	0.111729	0.361475	0.295752	PIK3R1/FYN/F2R/GNAS	4	T2
hsa04142	Lysosome	4/119	128/8034	0.121653	0.387879	0.317356	GGA2/CTSW/LITAF/IDS	4	T2
hsa04068	FoxO signaling pathway	4/119	131/8034	0.129338	0.40649	0.332583	PIK3R1/FASLG/GABARAPL1/TGFB1	4	T2
hsa04210	Apoptosis	4/119	136/8034	0.142584	0.435672	0.356459	TUBA4A/PIK3R1/CTSW/FASLG	4	T2
hsa04261	Adrenergic signaling in cardiomyocytes	4/119	149/8034	0.179342	0.481162	0.393678	PPP2R5C/CALM2/ATP1B3/GNAS	4	T2
hsa05160	Hepatitis C	4/119	155/8034	0.197297	0.491654	0.402263	PIK3R1/CD81/FASLG/IFNG	4	T2
hsa04217	Necroptosis	4/119	159/8034	0.209565	0.501134	0.410019	FASLG/IFNG/H2AFX/IFNGR1	4	T2
hsa05161	Hepatitis B	4/119	162/8034	0.218909	0.512339	0.419187	PIK3R1/FASLG/DDX3X/TGFB1	4	T2
hsa05034	Alcoholism	4/119	187/8034	0.300317	0.59488	0.48672	H3F3B/CALM2/GNAS/H2AFX	4	T2
hsa04020	Calcium signaling pathway	4/119	196/8034	0.330593	0.60981	0.498935	CXCR4/CALM2/F2R/GNAS	4	T2
hsa04810	Regulation of actin cytoskeleton	4/119	214/8034	0.391487	0.638204	0.522167	CXCR4/PIK3R1/F2R/ITGA4	4	T2
hsa05020	Prion diseases	3/119	35/8034	0.0146912	0.0808015	0.0661103	CCL5/FYN/HSPA5	3	T2
hsa05143	African trypanosomiasis	3/119	37/8034	0.0170731	0.0915196	0.0748797	VCAM1/FASLG/IFNG	3	T2
hsa04623	Cytosolic DNA-sensing pathway	3/119	63/8034	0.0663324	0.26533	0.217088	CCL5/CCL4/CCL4L2	3	T2
hsa05230	Central carbon metabolism in cancer	3/119	70/8034	0.0850098	0.311702	0.255029	PIK3R1/SLC1A5/LDHA	3	T2
hsa04918	Thyroid hormone synthesis	3/119	75/8034	0.0995705	0.340453	0.278552	ATP1B3/HSPA5/GNAS	3	T2
hsa04971	Gastric acid secretion	3/119	76/8034	0.102597	0.340453	0.278552	CALM2/ATP1B3/GNAS	3	T2
hsa04666	Fc gamma R-mediated phagocytosis	3/119	93/8034	0.159079	0.448686	0.367106	PIK3R1/PTPRC/ARF6	3	T2
hsa04970	Salivary secretion	3/119	93/8034	0.159079	0.448686	0.367106	CALM2/ATP1B3/GNAS	3	T2
hsa05414	Dilated cardiomyopathy (DCM)	3/119	96/8034	0.169894	0.461439	0.377541	GNAS/TGFB1/ITGA4	3	T2
hsa04933	AGE-RAGE signaling pathway in diabetic complications	3/119	100/8034	0.184632	0.482665	0.394907	PIK3R1/VCAM1/TGFB1	3	T2
hsa04064	NF-kappa B signaling pathway	3/119	104/8034	0.199697	0.491654	0.402263	CCL4/CCL4L2/VCAM1	3	T2
hsa04625	C-type lectin receptor signaling pathway	3/119	104/8034	0.199697	0.491654	0.402263	PIK3R1/CALM2/IRF1	3	T2
hsa04922	Glucagon signaling pathway	3/119	106/8034	0.207339	0.501134	0.410019	CALM2/GNAS/LDHA	3	T2
hsa04071	Sphingolipid signaling pathway	3/119	119/8034	0.258403	0.587016	0.480286	PIK3R1/PPP2R5C/FYN	3	T2
hsa04926	Relaxin signaling pathway	3/119	129/8034	0.298762	0.59488	0.48672	PIK3R1/GNAS/TGFB1	3	T2
hsa04728	Dopaminergic synapse	3/119	132/8034	0.31096	0.59488	0.48672	PPP2R5C/CALM2/GNAS	3	T2
hsa04270	Vascular smooth muscle contraction	3/119	135/8034	0.323175	0.60768	0.497193	CALM2/PRKCH/GNAS	3	T2
hsa04915	Estrogen signaling pathway	3/119	138/8034	0.335395	0.60981	0.498935	PIK3R1/CALM2/GNAS	3	T2
hsa05162	Measles	3/119	138/8034	0.335395	0.60981	0.498935	PIK3R1/CD3D/FASLG	3	T2
hsa04550	Signaling pathways regulating pluripotency of stem cells	3/119	143/8034	0.35574	0.631152	0.516397	PIK3R1/SKIL/ID1	3	T2
hsa04932	Non-alcoholic fatty liver disease (NAFLD)	3/119	149/8034	0.380053	0.638204	0.522167	PIK3R1/FASLG/TGFB1	3	T2
hsa04390	Hippo signaling pathway	3/119	157/8034	0.412163	0.648193	0.53034	SMAD7/TGFB1/ID1	3	T2
hsa04360	Axon guidance	3/119	181/8034	0.50484	0.723308	0.591798	CXCR4/PIK3R1/FYN	3	T2
hsa04510	Focal adhesion	3/119	201/8034	0.576109	0.750638	0.614159	PIK3R1/FYN/ITGA4	3	T2
hsa05132	Salmonella infection	3/119	206/8034	0.592916	0.750638	0.614159	PTPRC/ARF6/DYNC1H1	3	T2
hsa05206	MicroRNAs in cancer	3/119	310/8034	0.84392	0.875766	0.716536	ZEB2/PIK3R1/PDCD4	3	T2
hsa05010	Alzheimer disease	3/119	369/8034	0.916115	0.93308	0.763429	TUBA4A/PIK3R1/CALM2	3	T2
hsa04960	Aldosterone-regulated sodium reabsorption	2/119	37/8034	0.103683	0.340453	0.278552	PIK3R1/ATP1B3	2	T2
hsa04962	Vasopressin-regulated water reabsorption	2/119	44/8034	0.137975	0.427529	0.349796	GNAS/DYNC1H1	2	T2
hsa04973	Carbohydrate digestion and absorption	2/119	47/8034	0.153347	0.448686	0.367106	PIK3R1/ATP1B3	2	T2
hsa00270	Cysteine and methionine metabolism	2/119	49/8034	0.163774	0.450518	0.368606	AMD1/LDHA	2	T2
hsa04961	Endocrine and other factor-regulated calcium reabsorption	2/119	53/8034	0.184979	0.482665	0.394907	ATP1B3/GNAS	2	T2
hsa04923	Regulation of lipolysis in adipocytes	2/119	56/8034	0.201131	0.491654	0.402263	PIK3R1/GNAS	2	T2
hsa04370	VEGF signaling pathway	2/119	59/8034	0.217442	0.512339	0.419187	PIK3R1/SH2D2A	2	T2
hsa04137	Mitophagy - animal	2/119	68/8034	0.266896	0.587016	0.480286	UBC/GABARAPL1	2	T2
hsa04664	Fc epsilon RI signaling pathway	2/119	68/8034	0.266896	0.587016	0.480286	PIK3R1/FYN	2	T2
hsa04924	Renin secretion	2/119	69/8034	0.272409	0.587016	0.480286	CALM2/GNAS	2	T2
hsa05031	Amphetamine addiction	2/119	69/8034	0.272409	0.587016	0.480286	CALM2/GNAS	2	T2
hsa05211	Renal cell carcinoma	2/119	69/8034	0.272409	0.587016	0.480286	PIK3R1/TGFB1	2	T2
hsa04622	RIG-I-like receptor signaling pathway	2/119	70/8034	0.27792	0.587016	0.480286	DDX3X/RNF125	2	T2
hsa04917	Prolactin signaling pathway	2/119	70/8034	0.27792	0.587016	0.480286	PIK3R1/IRF1	2	T2
hsa01524	Platinum drug resistance	2/119	73/8034	0.294438	0.59488	0.48672	PIK3R1/FASLG	2	T2
hsa05214	Glioma	2/119	75/8034	0.305423	0.59488	0.48672	PIK3R1/CALM2	2	T2
hsa05133	Pertussis	2/119	76/8034	0.310905	0.59488	0.48672	CALM2/IRF1	2	T2
hsa05212	Pancreatic cancer	2/119	76/8034	0.310905	0.59488	0.48672	PIK3R1/TGFB1	2	T2
hsa05220	Chronic myeloid leukemia	2/119	76/8034	0.310905	0.59488	0.48672	PIK3R1/TGFB1	2	T2
hsa03320	PPAR signaling pathway	2/119	77/8034	0.316378	0.600027	0.490931	UBC/FABP5	2	T2
hsa04662	B cell receptor signaling pathway	2/119	82/8034	0.343583	0.614539	0.502805	PIK3R1/CD81	2	T2
hsa04911	Insulin secretion	2/119	86/8034	0.365105	0.637484	0.521578	ATP1B3/GNAS	2	T2
hsa05210	Colorectal cancer	2/119	86/8034	0.365105	0.637484	0.521578	PIK3R1/TGFB1	2	T2
hsa04540	Gap junction	2/119	88/8034	0.375768	0.638204	0.522167	TUBA4A/GNAS	2	T2
hsa04727	GABAergic synapse	2/119	89/8034	0.381072	0.638204	0.522167	GABARAPL1/SLC38A1	2	T2
hsa04976	Bile secretion	2/119	90/8034	0.386358	0.638204	0.522167	ATP1B3/GNAS	2	T2
hsa05410	Hypertrophic cardiomyopathy (HCM)	2/119	90/8034	0.386358	0.638204	0.522167	TGFB1/ITGA4	2	T2
hsa05032	Morphine addiction	2/119	91/8034	0.391625	0.638204	0.522167	GNAS/PDE4B	2	T2
hsa04912	GnRH signaling pathway	2/119	93/8034	0.402098	0.645704	0.528304	CALM2/GNAS	2	T2
hsa04657	IL-17 signaling pathway	2/119	94/8034	0.407303	0.648193	0.53034	JUND/IFNG	2	T2
hsa04974	Protein digestion and absorption	2/119	95/8034	0.412487	0.648193	0.53034	ATP1B3/SLC1A5	2	T2
hsa04070	Phosphatidylinositol signaling system	2/119	97/8034	0.422787	0.655022	0.535927	PIK3R1/CALM2	2	T2
hsa04713	Circadian entrainment	2/119	97/8034	0.422787	0.655022	0.535927	CALM2/GNAS	2	T2
hsa01522	Endocrine resistance	2/119	98/8034	0.427903	0.658312	0.538619	PIK3R1/GNAS	2	T2
hsa04916	Melanogenesis	2/119	101/8034	0.443109	0.672303	0.550066	CALM2/GNAS	2	T2
hsa04972	Pancreatic secretion	2/119	102/8034	0.448128	0.675262	0.552487	ATP1B3/GNAS	2	T2
hsa04725	Cholinergic synapse	2/119	113/8034	0.501617	0.723308	0.591798	PIK3R1/FYN	2	T2
hsa04724	Glutamatergic synapse	2/119	114/8034	0.506316	0.723308	0.591798	SLC38A1/GNAS	2	T2
hsa04726	Serotonergic synapse	2/119	115/8034	0.510985	0.72527	0.593402	GNAS/DUSP1	2	T2
hsa04935	Growth hormone synthesis, secretion and action	2/119	119/8034	0.529376	0.72962	0.596962	PIK3R1/GNAS	2	T2
hsa04152	AMPK signaling pathway	2/119	120/8034	0.533901	0.72962	0.596962	PIK3R1/PPP2R5C	2	T2
hsa04919	Thyroid hormone signaling pathway	2/119	121/8034	0.538397	0.731156	0.598218	PIK3R1/ATP1B3	2	T2
hsa04110	Cell cycle	2/119	124/8034	0.551705	0.740092	0.60553	CCNH/TGFB1	2	T2
hsa04114	Oocyte meiosis	2/119	128/8034	0.569031	0.750638	0.614159	PPP2R5C/CALM2	2	T2
hsa00230	Purine metabolism	2/119	130/8034	0.577513	0.750638	0.614159	GUK1/PDE4B	2	T2
hsa05017	Spinocerebellar ataxia	2/119	133/8034	0.590009	0.750638	0.614159	PIK3R1/ATXN1	2	T2
hsa04140	Autophagy - animal	2/119	137/8034	0.606246	0.750638	0.614159	PIK3R1/GABARAPL1	2	T2
hsa04371	Apelin signaling pathway	2/119	137/8034	0.606246	0.750638	0.614159	CALM2/GABARAPL1	2	T2
hsa04910	Insulin signaling pathway	2/119	137/8034	0.606246	0.750638	0.614159	PIK3R1/CALM2	2	T2
hsa04120	Ubiquitin mediated proteolysis	2/119	140/8034	0.618104	0.75546	0.618104	UBC/UBE2S	2	T2
hsa05226	Gastric cancer	2/119	149/8034	0.652045	0.762429	0.623806	PIK3R1/TGFB1	2	T2
hsa04921	Oxytocin signaling pathway	2/119	154/8034	0.669853	0.76754	0.627987	CALM2/GNAS	2	T2
hsa04530	Tight junction	2/119	161/8034	0.69355	0.78316	0.640767	TUBA4A/YBX3	2	T2
hsa04022	cGMP-PKG signaling pathway	2/119	167/8034	0.712741	0.792678	0.648555	CALM2/ATP1B3	2	T2
hsa04141	Protein processing in endoplasmic reticulum	2/119	167/8034	0.712741	0.792678	0.648555	HSPA5/HERPUD1	2	T2
hsa05225	Hepatocellular carcinoma	2/119	168/8034	0.715841	0.792678	0.648555	PIK3R1/TGFB1	2	T2
hsa03013	RNA transport	2/119	180/8034	0.750911	0.800991	0.655357	RANBP2/EIF1AX	2	T2
hsa04621	NOD-like receptor signaling pathway	2/119	181/8034	0.75366	0.800991	0.655357	CCL5/GABARAPL1	2	T2
hsa04080	Neuroactive ligand-receptor interaction	2/119	340/8034	0.964485	0.977819	0.800034	GZMA/F2R	2	T2
hsa00533	Glycosaminoglycan biosynthesis - keratan sulfate	1/119	14/8034	0.188678	0.482665	0.394907	B3GNT2	1	T2
hsa00531	Glycosaminoglycan degradation	1/119	19/8034	0.247124	0.572287	0.468235	IDS	1	T2
hsa00900	Terpenoid backbone biosynthesis	1/119	22/8034	0.280167	0.587016	0.480286	IDI1	1	T2
hsa03060	Protein export	1/119	23/8034	0.290858	0.59488	0.48672	HSPA5	1	T2
hsa04964	Proximal tubule bicarbonate reclamation	1/119	23/8034	0.290858	0.59488	0.48672	ATP1B3	1	T2
hsa00601	Glycosphingolipid biosynthesis - lacto and neolacto series	1/119	27/8034	0.332072	0.60981	0.498935	B3GNT2	1	T2
hsa04744	Phototransduction	1/119	28/8034	0.341999	0.614539	0.502805	CALM2	1	T2
hsa00512	Mucin type O-glycan biosynthesis	1/119	32/8034	0.380264	0.638204	0.522167	GALNT11	1	T2
hsa04136	Autophagy - other	1/119	32/8034	0.380264	0.638204	0.522167	GABARAPL1	1	T2
hsa00640	Propanoate metabolism	1/119	34/8034	0.398561	0.64473	0.527507	LDHA	1	T2
hsa00620	Pyruvate metabolism	1/119	39/8034	0.441992	0.672303	0.550066	LDHA	1	T2
hsa03022	Basal transcription factors	1/119	45/8034	0.490022	0.723308	0.591798	CCNH	1	T2
hsa03050	Proteasome	1/119	46/8034	0.497618	0.723308	0.591798	IFNG	1	T2
hsa04930	Type II diabetes mellitus	1/119	46/8034	0.497618	0.723308	0.591798	PIK3R1	1	T2
hsa00514	Other types of O-glycan biosynthesis	1/119	47/8034	0.505102	0.723308	0.591798	GALNT11	1	T2
hsa03420	Nucleotide excision repair	1/119	47/8034	0.505102	0.723308	0.591798	CCNH	1	T2
hsa05030	Cocaine addiction	1/119	49/8034	0.519741	0.72962	0.596962	GNAS	1	T2
hsa00330	Arginine and proline metabolism	1/119	50/8034	0.526898	0.72962	0.596962	AMD1	1	T2
hsa05110	Vibrio cholerae infection	1/119	50/8034	0.526898	0.72962	0.596962	GNAS	1	T2
hsa04913	Ovarian steroidogenesis	1/119	51/8034	0.533949	0.72962	0.596962	GNAS	1	T2
hsa04330	Notch signaling pathway	1/119	53/8034	0.547741	0.739283	0.604868	ATXN1	1	T2
hsa05014	Amyotrophic lateral sclerosis (ALS)	1/119	57/8034	0.574122	0.750638	0.614159	TNFRSF1B	1	T2
hsa05213	Endometrial cancer	1/119	58/8034	0.580475	0.750638	0.614159	PIK3R1	1	T2
hsa04978	Mineral absorption	1/119	59/8034	0.586735	0.750638	0.614159	ATP1B3	1	T2
hsa04730	Long-term depression	1/119	60/8034	0.592901	0.750638	0.614159	GNAS	1	T2
hsa04213	Longevity regulating pathway - multiple species	1/119	62/8034	0.604962	0.750638	0.614159	PIK3R1	1	T2
hsa04929	GnRH secretion	1/119	64/8034	0.616668	0.75546	0.618104	PIK3R1	1	T2
hsa04927	Cortisol synthesis and secretion	1/119	65/8034	0.622392	0.756498	0.618953	GNAS	1	T2
hsa00010	Glycolysis / Gluconeogenesis	1/119	67/8034	0.633586	0.757548	0.619812	LDHA	1	T2
hsa04720	Long-term potentiation	1/119	67/8034	0.633586	0.757548	0.619812	CALM2	1	T2
hsa05221	Acute myeloid leukemia	1/119	67/8034	0.633586	0.757548	0.619812	PIK3R1	1	T2
hsa05223	Non-small cell lung cancer	1/119	68/8034	0.639059	0.759962	0.621787	PIK3R1	1	T2
hsa04920	Adipocytokine signaling pathway	1/119	69/8034	0.644451	0.762254	0.623662	TNFRSF1B	1	T2
hsa05120	Epithelial cell signaling in Helicobacter pylori infection	1/119	70/8034	0.649763	0.762429	0.623806	CCL5	1	T2
hsa04520	Adherens junction	1/119	71/8034	0.654996	0.762429	0.623806	FYN	1	T2
hsa05218	Melanoma	1/119	72/8034	0.660152	0.764386	0.625407	PIK3R1	1	T2
hsa05100	Bacterial invasion of epithelial cells	1/119	73/8034	0.665231	0.766235	0.62692	PIK3R1	1	T2
hsa05412	Arrhythmogenic right ventricular cardiomyopathy (ARVC)	1/119	77/8034	0.684807	0.780609	0.63868	ITGA4	1	T2
hsa01521	EGFR tyrosine kinase inhibitor resistance	1/119	79/8034	0.694165	0.78316	0.640767	PIK3R1	1	T2
hsa04012	ErbB signaling pathway	1/119	85/8034	0.720617	0.792678	0.648555	PIK3R1	1	T2
hsa04610	Complement and coagulation cascades	1/119	85/8034	0.720617	0.792678	0.648555	F2R	1	T2
hsa04260	Cardiac muscle contraction	1/119	87/8034	0.728919	0.797822	0.652764	ATP1B3	1	T2
hsa04512	ECM-receptor interaction	1/119	88/8034	0.732979	0.798294	0.653149	ITGA4	1	T2
hsa04211	Longevity regulating pathway	1/119	89/8034	0.736978	0.798695	0.653478	PIK3R1	1	T2
hsa03015	mRNA surveillance pathway	1/119	91/8034	0.744798	0.800991	0.655357	PPP2R5C	1	T2
hsa05222	Small cell lung cancer	1/119	92/8034	0.748622	0.800991	0.655357	PIK3R1	1	T2
hsa05215	Prostate cancer	1/119	97/8034	0.766903	0.81069	0.663292	PIK3R1	1	T2
hsa05231	Choline metabolism in cancer	1/119	98/8034	0.770398	0.81069	0.663292	PIK3R1	1	T2
hsa04914	Progesterone-mediated oocyte maturation	1/119	99/8034	0.773841	0.81069	0.663292	PIK3R1	1	T2
hsa04931	Insulin resistance	1/119	108/8034	0.802611	0.836845	0.684692	PIK3R1	1	T2
hsa05224	Breast cancer	1/119	147/8034	0.890736	0.920009	0.752735	PIK3R1	1	T2
hsa04150	mTOR signaling pathway	1/119	155/8034	0.903254	0.92426	0.756213	PIK3R1	1	T2
hsa04934	Cushing syndrome	1/119	155/8034	0.903254	0.92426	0.756213	GNAS	1	T2
hsa04714	Thermogenesis	1/119	231/8034	0.969738	0.978635	0.800701	GNAS	1	T2
hsa05016	Huntington disease	1/119	306/8034	0.990496	0.995019	0.814106	TUBA4A	1	T2
hsa04740	Olfactory transduction	1/119	448/8034	0.998972	0.998972	0.817341	CALM2	1	T2
hsa03010	Ribosome	78/125	158/8034	3.94e-109	4.29e-107	4.29e-107	RPS3A/RPL32/RPS13/RPS6/RPL21/RPS23/RPL13/RPS12/RPL34/RPL22/RPL9/RPS8/RPL37/RPL30/RPL11/RPL23/RPS5/RPL19/RPS15A/RPL5/RPS25/RPS14/RPL29/RPL35A/RPL7/RPS27A/RPS10/RPS16/RPS9/RPL39/RPS28/RPL10A/RPLP2/RPL37A/RPL18/RPS21/RPL38/RPL18A/RPL10/RPL31/RPL26/RPL3/RPS4X/RPS11/RPS27/RPL12/RPS2/RPS20/RPS18/RPL4/RPS15/RPSA/RPL14/RPL24/RPL36/RPS3/RPL23A/RPL7A/RPL36A/RPL27A/RPL27/UBA52/RPL15/RPL13A/RPS29/RPS24/RPL6/…	78	T3
hsa03013	RNA transport	7/125	180/8034	0.0219977	0.984743	0.984743	EEF1A1/EIF3E/EIF3H/PABPC1/EIF2S3/EIF4B/EIF3F	7	T3
hsa05012	Parkinson disease	6/125	249/8034	0.191428	0.984743	0.984743	RPS27A/UBA52/COX7C/UQCRB/COX4I1/ATP5PO	6	T3
hsa04714	Thermogenesis	5/125	231/8034	0.290613	0.984743	0.984743	RPS6/COX7C/UQCRB/COX4I1/ATP5PO	5	T3
hsa00190	Oxidative phosphorylation	4/125	133/8034	0.152744	0.984743	0.984743	COX7C/UQCRB/COX4I1/ATP5PO	4	T3
hsa04371	Apelin signaling pathway	4/125	137/8034	0.16458	0.984743	0.984743	RPS6/KLF2/PDE3B/CAMK4	4	T3
hsa05016	Huntington disease	4/125	306/8034	0.707183	0.984743	0.984743	COX7C/UQCRB/COX4I1/ATP5PO	4	T3
hsa05010	Alzheimer disease	4/125	369/8034	0.83279	0.984743	0.984743	COX7C/UQCRB/COX4I1/ATP5PO	4	T3
hsa04137	Mitophagy - animal	3/125	68/8034	0.08904	0.984743	0.984743	RPS27A/UBA52/TOMM7	3	T3
hsa04520	Adherens junction	3/125	71/8034	0.0982815	0.984743	0.984743	LEF1/ACTN1/TCF7	3	T3
hsa04260	Cardiac muscle contraction	3/125	87/8034	0.153339	0.984743	0.984743	COX7C/UQCRB/COX4I1	3	T3
hsa00230	Purine metabolism	3/125	130/8034	0.329508	0.984743	0.984743	AK5/FHIT/PDE3B	3	T3
hsa04932	Non-alcoholic fatty liver disease (NAFLD)	3/125	149/8034	0.410211	0.984743	0.984743	COX7C/UQCRB/COX4I1	3	T3
hsa05132	Salmonella infection	3/125	206/8034	0.626378	0.984743	0.984743	LEF1/RPS3/TCF7	3	T3
hsa05131	Shigellosis	3/125	242/8034	0.732124	0.984743	0.984743	ACTN1/RPS27A/UBA52	3	T3
hsa04151	PI3K-Akt signaling pathway	3/125	354/8034	0.918522	0.984743	0.984743	RPS6/FLT3LG/EIF4B	3	T3
hsa05216	Thyroid cancer	2/125	37/8034	0.112537	0.984743	0.984743	LEF1/TCF7	2	T3
hsa00513	Various types of N-glycan biosynthesis	2/125	39/8034	0.122779	0.984743	0.984743	MGAT4A/ALG13	2	T3
hsa00510	N-Glycan biosynthesis	2/125	50/8034	0.1824	0.984743	0.984743	MGAT4A/ALG13	2	T3
hsa05134	Legionellosis	2/125	57/8034	0.222207	0.984743	0.984743	EEF1A1/EEF1G	2	T3
hsa05213	Endometrial cancer	2/125	58/8034	0.227959	0.984743	0.984743	LEF1/TCF7	2	T3
hsa05217	Basal cell carcinoma	2/125	63/8034	0.256842	0.984743	0.984743	LEF1/TCF7	2	T3
hsa05221	Acute myeloid leukemia	2/125	67/8034	0.280006	0.984743	0.984743	LEF1/TCF7	2	T3
hsa05412	Arrhythmogenic right ventricular cardiomyopathy (ARVC)	2/125	77/8034	0.337538	0.984743	0.984743	LEF1/TCF7	2	T3
hsa05210	Colorectal cancer	2/125	86/8034	0.388143	0.984743	0.984743	LEF1/TCF7	2	T3
hsa05215	Prostate cancer	2/125	97/8034	0.447593	0.984743	0.984743	LEF1/TCF7	2	T3
hsa04640	Hematopoietic cell lineage	2/125	99/8034	0.458062	0.984743	0.984743	CD55/FLT3LG	2	T3
hsa04916	Melanogenesis	2/125	101/8034	0.468417	0.984743	0.984743	LEF1/TCF7	2	T3
hsa04922	Glucagon signaling pathway	2/125	106/8034	0.493786	0.984743	0.984743	LDHB/PDE3B	2	T3
hsa04066	HIF-1 signaling pathway	2/125	109/8034	0.508641	0.984743	0.984743	RPS6/LDHB	2	T3
hsa04670	Leukocyte transendothelial migration	2/125	113/8034	0.528006	0.984743	0.984743	ACTN1/TXK	2	T3
hsa04722	Neurotrophin signaling pathway	2/125	119/8034	0.556082	0.984743	0.984743	BEX3/CAMK4	2	T3
hsa04910	Insulin signaling pathway	2/125	137/8034	0.633123	0.984743	0.984743	RPS6/PDE3B	2	T3
hsa05162	Measles	2/125	138/8034	0.637086	0.984743	0.984743	RACK1/EIF3H	2	T3
hsa04120	Ubiquitin mediated proteolysis	2/125	140/8034	0.644911	0.984743	0.984743	RPS27A/UBA52	2	T3
hsa05224	Breast cancer	2/125	147/8034	0.671259	0.984743	0.984743	LEF1/TCF7	2	T3
hsa05226	Gastric cancer	2/125	149/8034	0.678494	0.984743	0.984743	LEF1/TCF7	2	T3
hsa04921	Oxytocin signaling pathway	2/125	154/8034	0.696018	0.984743	0.984743	EEF2/CAMK4	2	T3
hsa04150	mTOR signaling pathway	2/125	155/8034	0.699428	0.984743	0.984743	RPS6/EIF4B	2	T3
hsa04934	Cushing syndrome	2/125	155/8034	0.699428	0.984743	0.984743	LEF1/TCF7	2	T3
hsa04390	Hippo signaling pathway	2/125	157/8034	0.706153	0.984743	0.984743	LEF1/TCF7	2	T3
hsa04310	Wnt signaling pathway	2/125	160/8034	0.716008	0.984743	0.984743	LEF1/TCF7	2	T3
hsa05225	Hepatocellular carcinoma	2/125	168/8034	0.740949	0.984743	0.984743	LEF1/TCF7	2	T3
hsa04062	Chemokine signaling pathway	2/125	189/8034	0.797722	0.984743	0.984743	CCR7/RASGRP2	2	T3
hsa05167	Kaposi sarcoma-associated herpesvirus infection	2/125	189/8034	0.797722	0.984743	0.984743	RPS27A/UBA52	2	T3
hsa05205	Proteoglycans in cancer	2/125	205/8034	0.833358	0.984743	0.984743	RPS6/EIF4B	2	T3
hsa04024	cAMP signaling pathway	2/125	216/8034	0.854493	0.984743	0.984743	PDE3B/CAMK4	2	T3
hsa04014	Ras signaling pathway	2/125	232/8034	0.880922	0.984743	0.984743	RASGRP2/FLT3LG	2	T3
hsa04010	MAPK signaling pathway	2/125	294/8034	0.946865	0.984743	0.984743	RASGRP2/FLT3LG	2	T3
hsa04060	Cytokine-cytokine receptor interaction	2/125	294/8034	0.946865	0.984743	0.984743	CCR7/LTB	2	T3
hsa05206	MicroRNAs in cancer	2/125	310/8034	0.95714	0.984743	0.984743	FOXP1/SOX4	2	T3
hsa00730	Thiamine metabolism	1/125	16/8034	0.222083	0.984743	0.984743	AK5	1	T3
hsa00100	Steroid biosynthesis	1/125	20/8034	0.26948	0.984743	0.984743	SC5D	1	T3
hsa03410	Base excision repair	1/125	33/8034	0.404599	0.984743	0.984743	APEX1	1	T3
hsa00040	Pentose and glucuronate interconversions	1/125	34/8034	0.413901	0.984743	0.984743	DCXR	1	T3
hsa00640	Propanoate metabolism	1/125	34/8034	0.413901	0.984743	0.984743	LDHB	1	T3
hsa00620	Pyruvate metabolism	1/125	39/8034	0.458292	0.984743	0.984743	LDHB	1	T3
hsa00270	Cysteine and methionine metabolism	1/125	49/8034	0.537311	0.984743	0.984743	LDHB	1	T3
hsa04923	Regulation of lipolysis in adipocytes	1/125	56/8034	0.58571	0.984743	0.984743	PDE3B	1	T3
hsa05416	Viral myocarditis	1/125	60/8034	0.611076	0.984743	0.984743	CD55	1	T3
hsa00970	Aminoacyl-tRNA biosynthesis	1/125	66/8034	0.646263	0.984743	0.984743	CARS	1	T3
hsa00010	Glycolysis / Gluconeogenesis	1/125	67/8034	0.651812	0.984743	0.984743	LDHB	1	T3
hsa04720	Long-term potentiation	1/125	67/8034	0.651812	0.984743	0.984743	CAMK4	1	T3
hsa05223	Non-small cell lung cancer	1/125	68/8034	0.657275	0.984743	0.984743	FHIT	1	T3
hsa04924	Renin secretion	1/125	69/8034	0.662653	0.984743	0.984743	PDE3B	1	T3
hsa05031	Amphetamine addiction	1/125	69/8034	0.662653	0.984743	0.984743	CAMK4	1	T3
hsa05230	Central carbon metabolism in cancer	1/125	70/8034	0.667947	0.984743	0.984743	LDHB	1	T3
hsa05214	Glioma	1/125	75/8034	0.693207	0.984743	0.984743	CAMK4	1	T3
hsa05140	Leishmaniasis	1/125	77/8034	0.702769	0.984743	0.984743	EEF1A1	1	T3
hsa01521	EGFR tyrosine kinase inhibitor resistance	1/125	79/8034	0.712035	0.984743	0.984743	RPS6	1	T3
hsa03018	RNA degradation	1/125	79/8034	0.712035	0.984743	0.984743	PABPC1	1	T3
hsa04610	Complement and coagulation cascades	1/125	85/8034	0.738147	0.984743	0.984743	CD55	1	T3
hsa04211	Longevity regulating pathway	1/125	89/8034	0.754237	0.984743	0.984743	CAMK4	1	T3
hsa03015	mRNA surveillance pathway	1/125	91/8034	0.76191	0.984743	0.984743	PABPC1	1	T3
hsa05032	Morphine addiction	1/125	91/8034	0.76191	0.984743	0.984743	PDE3B	1	T3
hsa05222	Small cell lung cancer	1/125	92/8034	0.765657	0.984743	0.984743	FHIT	1	T3
hsa05323	Rheumatoid arthritis	1/125	93/8034	0.769345	0.984743	0.984743	LTB	1	T3
hsa04925	Aldosterone synthesis and secretion	1/125	98/8034	0.78694	0.984743	0.984743	CAMK4	1	T3
hsa04914	Progesterone-mediated oocyte maturation	1/125	99/8034	0.790296	0.984743	0.984743	PDE3B	1	T3
hsa04061	Viral protein interaction with cytokine and cytokine receptor	1/125	100/8034	0.7936	0.984743	0.984743	CCR7	1	T3
hsa05146	Amoebiasis	1/125	102/8034	0.800053	0.984743	0.984743	ACTN1	1	T3
hsa04064	NF-kappa B signaling pathway	1/125	104/8034	0.806305	0.984743	0.984743	LTB	1	T3
hsa04928	Parathyroid hormone synthesis, secretion and action	1/125	106/8034	0.812364	0.984743	0.984743	NACA	1	T3
hsa03008	Ribosome biogenesis in eukaryotes	1/125	112/8034	0.829435	0.984743	0.984743	FBL	1	T3
hsa04725	Cholinergic synapse	1/125	113/8034	0.832126	0.984743	0.984743	CAMK4	1	T3
hsa04152	AMPK signaling pathway	1/125	120/8034	0.849821	0.984743	0.984743	EEF2	1	T3
hsa04611	Platelet activation	1/125	124/8034	0.859089	0.984743	0.984743	RASGRP2	1	T3
hsa04380	Osteoclast differentiation	1/125	128/8034	0.867789	0.984743	0.984743	CAMK4	1	T3
hsa04068	FoxO signaling pathway	1/125	131/8034	0.873962	0.984743	0.984743	KLF2	1	T3
hsa05322	Systemic lupus erythematosus	1/125	136/8034	0.883622	0.984743	0.984743	ACTN1	1	T3
hsa05418	Fluid shear stress and atherosclerosis	1/125	139/8034	0.889061	0.984743	0.984743	KLF2	1	T3
hsa04550	Signaling pathways regulating pluripotency of stem cells	1/125	143/8034	0.895923	0.984743	0.984743	TCF7	1	T3
hsa04514	Cell adhesion molecules (CAMs)	1/125	148/8034	0.903911	0.984743	0.984743	SELL	1	T3
hsa03040	Spliceosome	1/125	149/8034	0.905434	0.984743	0.984743	HNRNPA1	1	T3
hsa05160	Hepatitis C	1/125	155/8034	0.914083	0.984743	0.984743	EIF3E	1	T3
hsa04530	Tight junction	1/125	161/8034	0.921946	0.984743	0.984743	ACTN1	1	T3
hsa04022	cGMP-PKG signaling pathway	1/125	167/8034	0.929095	0.984743	0.984743	PDE3B	1	T3
hsa04360	Axon guidance	1/125	181/8034	0.943348	0.984743	0.984743	ABLIM1	1	T3
hsa05034	Alcoholism	1/125	187/8034	0.94855	0.984743	0.984743	CAMK4	1	T3
hsa05130	Pathogenic Escherichia coli infection	1/125	192/8034	0.95252	0.984743	0.984743	RPS3	1	T3
hsa05202	Transcriptional misregulation in cancer	1/125	192/8034	0.95252	0.984743	0.984743	KLF3	1	T3
hsa04020	Calcium signaling pathway	1/125	196/8034	0.955476	0.984743	0.984743	CAMK4	1	T3
hsa04510	Focal adhesion	1/125	201/8034	0.958916	0.984743	0.984743	ACTN1	1	T3
hsa05203	Viral carcinogenesis	1/125	204/8034	0.960852	0.984743	0.984743	ACTN1	1	T3
hsa04015	Rap1 signaling pathway	1/125	210/8034	0.964456	0.984743	0.984743	RASGRP2	1	T3
hsa05170	Human immunodeficiency virus 1 infection	1/125	212/8034	0.965583	0.984743	0.984743	SAMHD1	1	T3
hsa04810	Regulation of actin cytoskeleton	1/125	214/8034	0.966674	0.984743	0.984743	ACTN1	1	T3
hsa05165	Human papillomavirus infection	1/125	330/8034	0.994931	0.999646	0.999646	TCF7	1	T3
hsa05168	Herpes simplex virus 1 infection	1/125	491/8034	0.999646	0.999646	0.999646	ZNF891	1	T3
hsa04060	Cytokine-cytokine receptor interaction	9/61	294/8034	0.000338287	0.0209738	0.0174485	CCL20/CCR6/IL7R/IL23R/TNFRSF25/TNFSF13B/CXCR6/LTB/CD40LG	9	T4
hsa04064	NF-kappa B signaling pathway	7/61	104/8034	1.22e-05	0.00227342	0.0018913	TNFAIP3/NFKBIA/TNFSF13B/LTB/CD40LG/NFKB2/GADD45B	7	T4
hsa04657	IL-17 signaling pathway	6/61	94/8034	7.23e-05	0.00672002	0.00559051	CCL20/TNFAIP3/NFKBIA/JUN/FOS/FOSB	6	T4
hsa04210	Apoptosis	6/61	136/8034	0.000544941	0.0247575	0.0205962	NFKBIA/CTSH/ERN1/JUN/FOS/GADD45B	6	T4
hsa05202	Transcriptional misregulation in cancer	6/61	192/8034	0.00321118	0.0597279	0.0496887	ZBTB16/RUNX2/HPGD/NFKBIZ/ID2/GADD45B	6	T4
hsa05169	Epstein-Barr virus infection	6/61	201/8034	0.00402446	0.0623791	0.0518943	TNFAIP3/NFKBIA/JUN/VIM/NFKB2/GADD45B	6	T4
hsa04010	MAPK signaling pathway	6/61	294/8034	0.0234655	0.161012	0.133949	DUSP16/DUSP1/JUN/FOS/NFKB2/GADD45B	6	T4
hsa05323	Rheumatoid arthritis	5/61	93/8034	0.000665524	0.0247575	0.0205962	CCL20/TNFSF13B/LTB/JUN/FOS	5	T4
hsa04659	Th17 cell differentiation	5/61	107/8034	0.00125537	0.0389166	0.0323754	IL23R/RORA/NFKBIA/JUN/FOS	5	T4
hsa04668	TNF signaling pathway	5/61	112/8034	0.00153903	0.0408943	0.0340208	CCL20/TNFAIP3/NFKBIA/JUN/FOS	5	T4
hsa04380	Osteoclast differentiation	5/61	128/8034	0.00276713	0.0571874	0.0475753	NFKBIA/JUN/FOS/FOSB/NFKB2	5	T4
hsa05162	Measles	5/61	138/8034	0.00382674	0.0623791	0.0518943	TNFAIP3/NFKBIA/SLAMF1/JUN/FOS	5	T4
hsa03010	Ribosome	5/61	158/8034	0.00677232	0.0968963	0.0806098	RPLP1/RPLP0/RPS4Y1/RPL36A/RPL17	5	T4
hsa04062	Chemokine signaling pathway	5/61	189/8034	0.0140278	0.137325	0.114243	CCL20/CCR6/NFKBIA/CXCR6/PLCB1	5	T4
hsa05166	Human T-cell leukemia virus 1 infection	5/61	219/8034	0.0248601	0.161012	0.133949	NFKBIA/ZFP36/JUN/FOS/NFKB2	5	T4
hsa05140	Leishmaniasis	4/61	77/8034	0.00269237	0.0571874	0.0475753	NFKBIA/EEF1A1/JUN/FOS	4	T4
hsa05142	Chagas disease (American trypanosomiasis)	4/61	102/8034	0.00734618	0.0974648	0.0810828	NFKBIA/PLCB1/JUN/FOS	4	T4
hsa04660	T cell receptor signaling pathway	4/61	104/8034	0.00786007	0.0974648	0.0810828	NFKBIA/CD40LG/JUN/FOS	4	T4
hsa04928	Parathyroid hormone synthesis, secretion and action	4/61	106/8034	0.00839712	0.0976166	0.081209	PDE4D/RUNX2/PLCB1/FOS	4	T4
hsa04926	Relaxin signaling pathway	4/61	129/8034	0.0163633	0.144932	0.120571	NFKBIA/PLCB1/JUN/FOS	4	T4
hsa05017	Spinocerebellar ataxia	4/61	133/8034	0.0181069	0.14643	0.121818	RORA/ERN1/PLCB1/XBP1	4	T4
hsa05224	Breast cancer	4/61	147/8034	0.0251041	0.161012	0.133949	JUN/FOS/NFKB2/GADD45B	4	T4
hsa05161	Hepatitis B	4/61	162/8034	0.0342001	0.187095	0.155648	NFKBIA/JUN/YWHAQ/FOS	4	T4
hsa04141	Protein processing in endoplasmic reticulum	4/61	167/8034	0.0376088	0.199864	0.16627	PPP1R15A/ERN1/SEC61B/XBP1	4	T4
hsa04621	NOD-like receptor signaling pathway	4/61	181/8034	0.0481656	0.229713	0.191102	TNFAIP3/NFKBIA/PLCB1/JUN	4	T4
hsa05167	Kaposi sarcoma-associated herpesvirus infection	4/61	189/8034	0.054868	0.238126	0.198101	NFKBIA/ZFP36/JUN/FOS	4	T4
hsa05203	Viral carcinogenesis	4/61	204/8034	0.068734	0.290557	0.24172	NFKBIA/JUN/YWHAQ/NFKB2	4	T4
hsa05170	Human immunodeficiency virus 1 infection	4/61	212/8034	0.0768094	0.304076	0.252967	NFKBIA/CFL2/JUN/FOS	4	T4
hsa04024	cAMP signaling pathway	4/61	216/8034	0.0810206	0.307548	0.255855	PDE4D/NFKBIA/JUN/FOS	4	T4
hsa05012	Parkinson disease	4/61	249/8034	0.119951	0.377084	0.313703	KIF5C/ERN1/DUSP1/XBP1	4	T4
hsa05010	Alzheimer disease	4/61	369/8034	0.307138	0.585034	0.486701	KIF5C/ERN1/PLCB1/XBP1	4	T4
hsa05134	Legionellosis	3/61	57/8034	0.00911022	0.0996766	0.0829228	NFKBIA/EEF1A1/NFKB2	3	T4
hsa05321	Inflammatory bowel disease (IBD)	3/61	65/8034	0.0130309	0.134652	0.11202	IL23R/RORA/JUN	3	T4
hsa05031	Amphetamine addiction	3/61	69/8034	0.0153005	0.142295	0.118378	JUN/FOS/FOSB	3	T4
hsa04115	p53 signaling pathway	3/61	73/8034	0.0177801	0.14643	0.121818	PERP/CCNG2/GADD45B	3	T4
hsa05133	Pertussis	3/61	76/8034	0.0197785	0.153284	0.127519	CFL2/JUN/FOS	3	T4
hsa04662	B cell receptor signaling pathway	3/61	82/8034	0.0241341	0.161012	0.133949	NFKBIA/JUN/FOS	3	T4
hsa05210	Colorectal cancer	3/61	86/8034	0.0273038	0.169283	0.14083	JUN/FOS/GADD45B	3	T4
hsa05235	PD-L1 expression and PD-1 checkpoint pathway in cancer	3/61	89/8034	0.0298204	0.178922	0.148849	NFKBIA/JUN/FOS	3	T4
hsa04658	Th1 and Th2 cell differentiation	3/61	92/8034	0.0324561	0.187095	0.155648	NFKBIA/JUN/FOS	3	T4
hsa04933	AGE-RAGE signaling pathway in diabetic complications	3/61	100/8034	0.0400614	0.206984	0.172194	PLCB1/PIM1/JUN	3	T4
hsa04620	Toll-like receptor signaling pathway	3/61	104/8034	0.0441747	0.216224	0.17988	NFKBIA/JUN/FOS	3	T4
hsa04625	C-type lectin receptor signaling pathway	3/61	104/8034	0.0441747	0.216224	0.17988	NFKBIA/JUN/NFKB2	3	T4
hsa05135	Yersinia infection	3/61	130/8034	0.0757182	0.304076	0.252967	NFKBIA/JUN/FOS	3	T4
hsa04068	FoxO signaling pathway	3/61	131/8034	0.0770892	0.304076	0.252967	IL7R/CCNG2/GADD45B	3	T4
hsa04728	Dopaminergic synapse	3/61	132/8034	0.0784713	0.304076	0.252967	KIF5C/PLCB1/FOS	3	T4
hsa04915	Estrogen signaling pathway	3/61	138/8034	0.0869911	0.322576	0.268357	PLCB1/JUN/FOS	3	T4
hsa05418	Fluid shear stress and atherosclerosis	3/61	139/8034	0.0884483	0.322576	0.268357	DUSP1/JUN/FOS	3	T4
hsa04932	Non-alcoholic fatty liver disease (NAFLD)	3/61	149/8034	0.103579	0.356772	0.296805	ERN1/XBP1/JUN	3	T4
hsa04921	Oxytocin signaling pathway	3/61	154/8034	0.111509	0.368492	0.306556	PLCB1/JUN/FOS	3	T4
hsa04630	JAK-STAT signaling pathway	3/61	162/8034	0.124667	0.380134	0.31624	IL7R/IL23R/PIM1	3	T4
hsa05130	Pathogenic Escherichia coli infection	3/61	192/8034	0.178452	0.461001	0.383515	NFKBIA/JUN/FOS	3	T4
hsa05132	Salmonella infection	3/61	206/8034	0.205475	0.504557	0.419751	NFKBIA/JUN/FOS	3	T4
hsa05131	Shigellosis	3/61	242/8034	0.278526	0.569296	0.473608	NFKBIA/PLCB1/JUN	3	T4
hsa05016	Huntington disease	3/61	306/8034	0.412089	0.622227	0.517642	KIF5C/ERN1/PLCB1	3	T4
hsa05206	MicroRNAs in cancer	3/61	310/8034	0.420303	0.625411	0.520291	ABCB1/PIM1/VIM	3	T4
hsa04710	Circadian rhythm	2/61	31/8034	0.0228958	0.161012	0.133949	RORA/BHLHE40	2	T4
hsa05340	Primary immunodeficiency	2/61	38/8034	0.033465	0.187095	0.155648	IL7R/CD40LG	2	T4
hsa04672	Intestinal immune network for IgA production	2/61	49/8034	0.0531019	0.238126	0.198101	TNFSF13B/CD40LG	2	T4
hsa05030	Cocaine addiction	2/61	49/8034	0.0531019	0.238126	0.198101	JUN/FOSB	2	T4
hsa05144	Malaria	2/61	50/8034	0.0550505	0.238126	0.198101	KLRB1/CD40LG	2	T4
hsa05221	Acute myeloid leukemia	2/61	67/8034	0.0916389	0.327785	0.272691	ZBTB16/PIM1	2	T4
hsa05120	Epithelial cell signaling in Helicobacter pylori infection	2/61	70/8034	0.0986835	0.346323	0.288113	NFKBIA/JUN	2	T4
hsa04971	Gastric acid secretion	2/61	76/8034	0.113208	0.368492	0.306556	CA2/PLCB1	2	T4
hsa05220	Chronic myeloid leukemia	2/61	76/8034	0.113208	0.368492	0.306556	NFKBIA/GADD45B	2	T4
hsa04976	Bile secretion	2/61	90/8034	0.148979	0.439843	0.365914	CA2/ABCB1	2	T4
hsa05222	Small cell lung cancer	2/61	92/8034	0.154266	0.446946	0.371823	NFKBIA/GADD45B	2	T4
hsa04912	GnRH signaling pathway	2/61	93/8034	0.156923	0.446946	0.371823	PLCB1/JUN	2	T4
hsa04713	Circadian entrainment	2/61	97/8034	0.167639	0.452611	0.376536	PLCB1/FOS	2	T4
hsa01522	Endocrine resistance	2/61	98/8034	0.170338	0.452611	0.376536	JUN/FOS	2	T4
hsa05231	Choline metabolism in cancer	2/61	98/8034	0.170338	0.452611	0.376536	JUN/FOS	2	T4
hsa04061	Viral protein interaction with cytokine and cytokine receptor	2/61	100/8034	0.175758	0.460437	0.383046	CCL20/CCR6	2	T4
hsa04972	Pancreatic secretion	2/61	102/8034	0.181207	0.461705	0.384101	CA2/PLCB1	2	T4
hsa05145	Toxoplasmosis	2/61	112/8034	0.208802	0.504557	0.419751	NFKBIA/CD40LG	2	T4
hsa04725	Cholinergic synapse	2/61	113/8034	0.211589	0.504557	0.419751	PLCB1/FOS	2	T4
hsa04726	Serotonergic synapse	2/61	115/8034	0.217173	0.511318	0.425375	PLCB1/DUSP1	2	T4
hsa04722	Neurotrophin signaling pathway	2/61	119/8034	0.228381	0.518035	0.430963	NFKBIA/JUN	2	T4
hsa04935	Growth hormone synthesis, secretion and action	2/61	119/8034	0.228381	0.518035	0.430963	PLCB1/FOS	2	T4
hsa04110	Cell cycle	2/61	124/8034	0.24245	0.526376	0.437902	YWHAQ/GADD45B	2	T4
hsa05226	Gastric cancer	2/61	149/8034	0.313018	0.585034	0.486701	ABCB1/GADD45B	2	T4
hsa04150	mTOR signaling pathway	2/61	155/8034	0.329836	0.588566	0.489639	PRR5/SLC7A5	2	T4
hsa05160	Hepatitis C	2/61	155/8034	0.329836	0.588566	0.489639	NFKBIA/YWHAQ	2	T4
hsa04390	Hippo signaling pathway	2/61	157/8034	0.335419	0.588566	0.489639	ID2/YWHAQ	2	T4
hsa04310	Wnt signaling pathway	2/61	160/8034	0.343771	0.597583	0.497141	PLCB1/JUN	2	T4
hsa05163	Human cytomegalovirus infection	2/61	225/8034	0.513277	0.691353	0.575149	NFKBIA/PLCB1	2	T4
hsa04151	PI3K-Akt signaling pathway	2/61	354/8034	0.757202	0.791233	0.658242	IL7R/YWHAQ	2	T4
hsa00360	Phenylalanine metabolism	1/61	16/8034	0.114906	0.368492	0.306556	IL4I1	1	T4
hsa00910	Nitrogen metabolism	1/61	17/8034	0.12164	0.377084	0.313703	CA2	1	T4
hsa00532	Glycosaminoglycan biosynthesis - chondroitin sulfate / dermatan sulfate	1/61	20/8034	0.14154	0.42462	0.353249	DSE	1	T4
hsa03060	Protein export	1/61	23/8034	0.160997	0.446946	0.371823	SEC61B	1	T4
hsa04964	Proximal tubule bicarbonate reclamation	1/61	23/8034	0.160997	0.446946	0.371823	CA2	1	T4
hsa04966	Collecting duct acid secretion	1/61	27/8034	0.186265	0.468181	0.389488	CA2	1	T4
hsa05310	Asthma	1/61	31/8034	0.210785	0.504557	0.419751	CD40LG	1	T4
hsa00051	Fructose and mannose metabolism	1/61	33/8034	0.222771	0.517943	0.430886	PFKFB3	1	T4
hsa00350	Tyrosine metabolism	1/61	35/8034	0.234578	0.525681	0.437323	IL4I1	1	T4
hsa00250	Alanine, aspartate and glutamate metabolism	1/61	36/8034	0.240415	0.526376	0.437902	IL4I1	1	T4
hsa05143	African trypanosomiasis	1/61	37/8034	0.246208	0.526376	0.437902	PLCB1	1	T4
hsa05216	Thyroid cancer	1/61	37/8034	0.246208	0.526376	0.437902	GADD45B	1	T4
hsa05330	Allograft rejection	1/61	38/8034	0.251958	0.532548	0.443036	CD40LG	1	T4
hsa00513	Various types of N-glycan biosynthesis	1/61	39/8034	0.257665	0.53849	0.44798	MGAT4A	1	T4
hsa00380	Tryptophan metabolism	1/61	42/8034	0.274529	0.56736	0.471997	IL4I1	1	T4
hsa04962	Vasopressin-regulated water reabsorption	1/61	44/8034	0.285562	0.577332	0.480293	AQP3	1	T4
hsa02010	ABC transporters	1/61	45/8034	0.291016	0.582033	0.484204	ABCB1	1	T4
hsa00600	Sphingolipid metabolism	1/61	47/8034	0.301803	0.585034	0.486701	CERK	1	T4
hsa04973	Carbohydrate digestion and absorption	1/61	47/8034	0.301803	0.585034	0.486701	PLCB1	1	T4
hsa00280	Valine, leucine and isoleucine degradation	1/61	48/8034	0.307135	0.585034	0.486701	IL4I1	1	T4
hsa00270	Cysteine and methionine metabolism	1/61	49/8034	0.312427	0.585034	0.486701	IL4I1	1	T4
hsa00510	N-Glycan biosynthesis	1/61	50/8034	0.31768	0.585034	0.486701	MGAT4A	1	T4
hsa05110	Vibrio cholerae infection	1/61	50/8034	0.31768	0.585034	0.486701	SEC61B	1	T4
hsa04961	Endocrine and other factor-regulated calcium reabsorption	1/61	53/8034	0.333202	0.588566	0.489639	PLCB1	1	T4
hsa05320	Autoimmune thyroid disease	1/61	53/8034	0.333202	0.588566	0.489639	CD40LG	1	T4
hsa05213	Endometrial cancer	1/61	58/8034	0.358304	0.617079	0.513359	GADD45B	1	T4
hsa04730	Long-term depression	1/61	60/8034	0.368082	0.622227	0.517642	PLCB1	1	T4
hsa05416	Viral myocarditis	1/61	60/8034	0.368082	0.622227	0.517642	CD40LG	1	T4
hsa04623	Cytosolic DNA-sensing pathway	1/61	63/8034	0.382476	0.622227	0.517642	NFKBIA	1	T4
hsa05217	Basal cell carcinoma	1/61	63/8034	0.382476	0.622227	0.517642	GADD45B	1	T4
hsa04929	GnRH secretion	1/61	64/8034	0.387201	0.622227	0.517642	PLCB1	1	T4
hsa04927	Cortisol synthesis and secretion	1/61	65/8034	0.391892	0.622227	0.517642	PLCB1	1	T4
hsa04720	Long-term potentiation	1/61	67/8034	0.401166	0.622227	0.517642	PLCB1	1	T4
hsa04137	Mitophagy - animal	1/61	68/8034	0.405751	0.622227	0.517642	JUN	1	T4
hsa05223	Non-small cell lung cancer	1/61	68/8034	0.405751	0.622227	0.517642	GADD45B	1	T4
hsa04920	Adipocytokine signaling pathway	1/61	69/8034	0.410302	0.622227	0.517642	NFKBIA	1	T4
hsa04924	Renin secretion	1/61	69/8034	0.410302	0.622227	0.517642	PLCB1	1	T4
hsa05211	Renal cell carcinoma	1/61	69/8034	0.410302	0.622227	0.517642	JUN	1	T4
hsa04622	RIG-I-like receptor signaling pathway	1/61	70/8034	0.414818	0.622227	0.517642	NFKBIA	1	T4
hsa04917	Prolactin signaling pathway	1/61	70/8034	0.414818	0.622227	0.517642	FOS	1	T4
hsa05230	Central carbon metabolism in cancer	1/61	70/8034	0.414818	0.622227	0.517642	SLC7A5	1	T4
hsa05218	Melanoma	1/61	72/8034	0.423749	0.625534	0.520393	GADD45B	1	T4
hsa00562	Inositol phosphate metabolism	1/61	73/8034	0.428163	0.627074	0.521675	PLCB1	1	T4
hsa04918	Thyroid hormone synthesis	1/61	75/8034	0.436894	0.62994	0.524059	PLCB1	1	T4
hsa05214	Glioma	1/61	75/8034	0.436894	0.62994	0.524059	GADD45B	1	T4
hsa05212	Pancreatic cancer	1/61	76/8034	0.441209	0.631269	0.525164	GADD45B	1	T4
hsa04012	ErbB signaling pathway	1/61	85/8034	0.478616	0.679562	0.56534	JUN	1	T4
hsa04911	Insulin secretion	1/61	86/8034	0.482617	0.680051	0.565747	PLCB1	1	T4
hsa04540	Gap junction	1/61	88/8034	0.490529	0.686003	0.570698	PLCB1	1	T4
hsa05032	Morphine addiction	1/61	91/8034	0.502174	0.691353	0.575149	PDE4D	1	T4
hsa04666	Fc gamma R-mediated phagocytosis	1/61	93/8034	0.509791	0.691353	0.575149	CFL2	1	T4
hsa04970	Salivary secretion	1/61	93/8034	0.509791	0.691353	0.575149	PLCB1	1	T4
hsa04350	TGF-beta signaling pathway	1/61	94/8034	0.513557	0.691353	0.575149	ID2	1	T4
hsa04974	Protein digestion and absorption	1/61	95/8034	0.517294	0.691353	0.575149	DPP4	1	T4
hsa04070	Phosphatidylinositol signaling system	1/61	97/8034	0.524684	0.691353	0.575149	PLCB1	1	T4
hsa05215	Prostate cancer	1/61	97/8034	0.524684	0.691353	0.575149	NFKBIA	1	T4
hsa04925	Aldosterone synthesis and secretion	1/61	98/8034	0.528337	0.691353	0.575149	PLCB1	1	T4
hsa04640	Hematopoietic cell lineage	1/61	99/8034	0.531962	0.691353	0.575149	IL7R	1	T4
hsa04750	Inflammatory mediator regulation of TRP channels	1/61	100/8034	0.53556	0.691353	0.575149	PLCB1	1	T4
hsa04916	Melanogenesis	1/61	101/8034	0.539131	0.691353	0.575149	PLCB1	1	T4
hsa05146	Amoebiasis	1/61	102/8034	0.542675	0.691353	0.575149	PLCB1	1	T4
hsa04922	Glucagon signaling pathway	1/61	106/8034	0.556584	0.704249	0.585878	PLCB1	1	T4
hsa04931	Insulin resistance	1/61	108/8034	0.563382	0.707477	0.588563	NFKBIA	1	T4
hsa04066	HIF-1 signaling pathway	1/61	109/8034	0.566742	0.707477	0.588563	PFKFB3	1	T4
hsa04724	Glutamatergic synapse	1/61	114/8034	0.583166	0.723125	0.601581	PLCB1	1	T4
hsa04071	Sphingolipid signaling pathway	1/61	119/8034	0.598977	0.735654	0.612004	PLCB1	1	T4
hsa04152	AMPK signaling pathway	1/61	120/8034	0.602067	0.735654	0.612004	PFKFB3	1	T4
hsa04919	Thyroid hormone signaling pathway	1/61	121/8034	0.605134	0.735654	0.612004	PLCB1	1	T4
hsa04611	Platelet activation	1/61	124/8034	0.614197	0.741823	0.617136	PLCB1	1	T4
hsa04114	Oocyte meiosis	1/61	128/8034	0.625963	0.746341	0.620895	YWHAQ	1	T4
hsa04142	Lysosome	1/61	128/8034	0.625963	0.746341	0.620895	CTSH	1	T4
hsa00230	Purine metabolism	1/61	130/8034	0.631713	0.747008	0.62145	PDE4D	1	T4
hsa04650	Natural killer cell mediated cytotoxicity	1/61	131/8034	0.634556	0.747008	0.62145	NCR3	1	T4
hsa04270	Vascular smooth muscle contraction	1/61	135/8034	0.645711	0.74763	0.621967	PLCB1	1	T4
hsa05322	Systemic lupus erythematosus	1/61	136/8034	0.648447	0.74763	0.621967	CD40LG	1	T4
hsa04140	Autophagy - animal	1/61	137/8034	0.651162	0.74763	0.621967	ERN1	1	T4
hsa04371	Apelin signaling pathway	1/61	137/8034	0.651162	0.74763	0.621967	PLCB1	1	T4
hsa04550	Signaling pathways regulating pluripotency of stem cells	1/61	143/8034	0.667025	0.759792	0.632085	ID2	1	T4
hsa04072	Phospholipase D signaling pathway	1/61	148/8034	0.679701	0.759792	0.632085	PLCB1	1	T4
hsa04514	Cell adhesion molecules (CAMs)	1/61	148/8034	0.679701	0.759792	0.632085	CD40LG	1	T4
hsa04723	Retrograde endocannabinoid signaling	1/61	148/8034	0.679701	0.759792	0.632085	PLCB1	1	T4
hsa04261	Adrenergic signaling in cardiomyocytes	1/61	149/8034	0.682179	0.759792	0.632085	PLCB1	1	T4
hsa04145	Phagosome	1/61	152/8034	0.689499	0.763374	0.635065	SEC61B	1	T4
hsa04934	Cushing syndrome	1/61	155/8034	0.696653	0.76479	0.636243	PLCB1	1	T4
hsa04218	Cellular senescence	1/61	156/8034	0.699002	0.76479	0.636243	GADD45B	1	T4
hsa04217	Necroptosis	1/61	159/8034	0.70594	0.767865	0.638801	TNFAIP3	1	T4
hsa04530	Tight junction	1/61	161/8034	0.710479	0.768308	0.63917	JUN	1	T4
hsa04022	cGMP-PKG signaling pathway	1/61	167/8034	0.723684	0.775884	0.645472	PLCB1	1	T4
hsa05225	Hepatocellular carcinoma	1/61	168/8034	0.725827	0.775884	0.645472	GADD45B	1	T4
hsa05164	Influenza A	1/61	170/8034	0.730063	0.775952	0.645529	NFKBIA	1	T4
hsa03013	RNA transport	1/61	180/8034	0.750297	0.790485	0.657619	EEF1A1	1	T4
hsa04360	Axon guidance	1/61	181/8034	0.752236	0.790485	0.657619	CFL2	1	T4
hsa05034	Alcoholism	1/61	187/8034	0.763565	0.793425	0.660065	FOSB	1	T4
hsa04020	Calcium signaling pathway	1/61	196/8034	0.779609	0.805596	0.670191	PLCB1	1	T4
hsa04510	Focal adhesion	1/61	201/8034	0.788055	0.809825	0.673708	JUN	1	T4
hsa04015	Rap1 signaling pathway	1/61	210/8034	0.802463	0.820099	0.682256	PLCB1	1	T4
hsa04810	Regulation of actin cytoskeleton	1/61	214/8034	0.808553	0.821808	0.683677	CFL2	1	T4
hsa04144	Endocytosis	1/61	248/8034	0.853388	0.862664	0.717666	KIF5C	1	T4
hsa04080	Neuroactive ligand-receptor interaction	1/61	340/8034	0.929198	0.93422	0.777195	GPR35	1	T4
hsa05168	Herpes simplex virus 1 infection	1/61	491/8034	0.978968	0.978968	0.814422	NFKBIA	1	T4
hsa04810	Regulation of actin cytoskeleton	27/176	214/8034	9.08e-14	1.04e-11	8.41e-12	ITGB2/ARPC2/ITGAM/ITGB1/ACTG1/MYL12A/ACTB/ITGAL/PFN1/ARPC4/CFL1/RAC2/VCL/ARPC3/ARPC5L/IQGAP2/MSN/ARPC5/ACTN4/PPP1CA/PXN/CDC42/DIAPH1/ITGB7/MAP2K2/PPP1R12A/IQGAP1	27	T5
hsa04650	Natural killer cell mediated cytotoxicity	23/176	131/8034	5.21e-15	1.2e-12	9.66e-13	GZMB/FCGR3A/KLRD1/TYROBP/PRF1/HLA-C/SH2D1B/CD247/NCR1/KLRC2/FCER1G/ITGB2/HLA-A/HLA-B/KLRC1/ITGAL/HCST/HLA-E/KIR3DL2/RAC2/ZAP70/NCR3/MAP2K2	23	T5
hsa05131	Shigellosis	19/176	242/8034	1.27e-06	2.43e-05	1.96e-05	ARPC2/ITGB1/ACTG1/MYL12A/ACTB/CCL5/UBB/PFN1/ARPC4/VCL/ARPC3/ARPC5L/ARPC5/ACTN4/TLN1/PXN/CDC42/DIAPH1/CAPNS1	19	T5
hsa04670	Leukocyte transendothelial migration	18/176	113/8034	3.13e-11	2.4e-09	1.94e-09	CYBA/ITGB2/ITGAM/ITGB1/ACTG1/MYL12A/ACTB/RAP1B/ITGAL/TXK/CD99/RAC2/VCL/MSN/ACTN4/PXN/VASP/CDC42	18	T5
hsa04510	Focal adhesion	18/176	201/8034	3.57e-07	1.03e-05	8.26e-06	FLNA/ITGB1/ACTG1/MYL12A/ACTB/RAP1B/RAC2/VCL/ACTN4/TLN1/PPP1CA/PXN/VASP/COL6A2/CDC42/DIAPH1/ITGB7/PPP1R12A	18	T5
hsa05170	Human immunodeficiency virus 1 infection	18/176	212/8034	7.87e-07	1.81e-05	1.46e-05	HLA-C/CD247/B2M/HLA-A/HLA-B/APOBEC3G/GNG2/HLA-E/TNFRSF1B/CFL1/RAC2/APOBEC3C/PXN/HLA-F/CALR/BST2/MAP2K2/PDIA3	18	T5
hsa05163	Human cytomegalovirus infection	18/176	225/8034	1.87e-06	3.32e-05	2.67e-05	HLA-C/B2M/HLA-A/HLA-B/CCL5/CCL4/GNG2/HLA-E/CCL3/RAC2/PXN/HLA-F/CALR/ADCY7/AKAP13/MAP2K2/JAK1/PDIA3	18	T5
hsa05165	Human papillomavirus infection	17/176	330/8034	0.000880409	0.00653207	0.00526153	HLA-C/HLA-A/ITGB1/HLA-B/HLA-E/IRF1/LLGL2/PXN/COL6A2/HLA-F/CDC42/LFNG/TADA3/ITGB7/SLC9A3R1/MAP2K2/JAK1	17	T5
hsa04514	Cell adhesion molecules (CAMs)	16/176	148/8034	1.26e-07	4.13e-06	3.32e-06	HLA-C/NCAM1/ITGB2/ITGAM/HLA-A/ITGB1/HLA-B/ITGAL/HLA-E/SPN/CD99/SELPLG/HLA-DPB1/HLA-F/ITGB7/CD226	16	T5
hsa05166	Human T-cell leukemia virus 1 infection	16/176	219/8034	2.26e-05	0.000274118	0.0002208	HLA-C/B2M/ITGB2/HLA-A/HLA-B/ITGAL/TGFB1/HLA-E/TLN1/HLA-DPB1/HLA-F/IL2RB/CALR/ADCY7/MAP2K2/JAK1	16	T5
hsa05169	Epstein-Barr virus infection	15/176	201/8034	3.22e-05	0.000370087	0.000298102	HLA-C/CD247/B2M/HLA-A/HLA-B/LYN/ITGAL/HLA-E/HLA-DPB1/HLA-F/CALR/ADRM1/PSMD8/JAK1/PDIA3	15	T5
hsa04015	Rap1 signaling pathway	15/176	210/8034	5.35e-05	0.00058462	0.000470907	ITGB2/ITGAM/ITGB1/ACTG1/ACTB/RAP1B/ITGAL/PFN1/RAC2/TLN1/VASP/CDC42/ADCY7/EVL/MAP2K2	15	T5
hsa04612	Antigen processing and presentation	14/176	78/8034	1.06e-09	4.85e-08	3.91e-08	KLRD1/HLA-C/KLRC2/B2M/HLA-A/HLA-B/KLRC1/HLA-E/KIR3DL2/HLA-DPB1/HLA-F/CALR/PSME1/PDIA3	14	T5
hsa04145	Phagosome	14/176	152/8034	5.46e-06	7.86e-05	6.33e-05	FCGR3A/HLA-C/CYBA/ITGB2/ITGAM/HLA-A/ITGB1/HLA-B/ACTG1/ACTB/HLA-E/HLA-DPB1/HLA-F/CALR	14	T5
hsa04062	Chemokine signaling pathway	13/176	189/8034	0.000248219	0.00237876	0.00191607	CX3CR1/FGR/LYN/CCL5/RAP1B/CCL4/GNG2/CCL3/RAC2/PXN/XCL2/CDC42/ADCY7	13	T5
hsa05130	Pathogenic Escherichia coli infection	13/176	192/8034	0.00028967	0.00256246	0.00206404	ARPC2/MYO1F/ITGB1/ACTG1/ACTB/ARPC4/ARPC3/ARPC5L/MYO1G/ARPC5/CDC42/SLC9A3R1/NCL	13	T5
hsa05205	Proteoglycans in cancer	13/176	205/8034	0.000544702	0.00447434	0.00360404	FLNA/ITGB1/ACTG1/ACTB/CD63/TGFB1/MSN/PPP1CA/PXN/CDC42/MAP2K2/PPP1R12A/IQGAP1	13	T5
hsa05132	Salmonella infection	13/176	206/8034	0.00057045	0.00452426	0.00364425	FLNA/ARPC2/ACTG1/MYL12A/ACTB/PFN1/ARPC4/ARPC3/ARPC5L/ARPC5/PKN1/CDC42/MAP2K2	13	T5
hsa04144	Endocytosis	13/176	248/8034	0.00306638	0.0219465	0.0176777	HLA-C/ARPC2/HLA-A/HLA-B/HLA-E/ARPC4/ARPC3/ARPC5L/ARPC5/IGF2R/HLA-F/IL2RB/CDC42	13	T5
hsa05168	Herpes simplex virus 1 infection	13/176	491/8034	0.279079	0.661734	0.533022	HLA-C/B2M/HLA-A/HLA-B/CCL5/HLA-E/PPP1CA/HLA-DPB1/HLA-F/CALR/BST2/JAK1/PDIA3	13	T5
hsa05416	Viral myocarditis	12/176	60/8034	4.71e-09	1.8e-07	1.45e-07	PRF1/HLA-C/ITGB2/HLA-A/HLA-B/ACTG1/ACTB/ITGAL/HLA-E/RAC2/HLA-DPB1/HLA-F	12	T5
hsa04611	Platelet activation	12/176	124/8034	1.58e-05	0.000214431	0.000172723	FCER1G/ITGB1/LYN/ACTG1/MYL12A/ACTB/RAP1B/TLN1/PPP1CA/VASP/ADCY7/PPP1R12A	12	T5
hsa05332	Graft-versus-host disease	11/176	42/8034	9.69e-10	4.85e-08	3.91e-08	GZMB/KLRD1/PRF1/HLA-C/HLA-A/HLA-B/KLRC1/HLA-E/KIR3DL2/HLA-DPB1/HLA-F	11	T5
hsa05100	Bacterial invasion of epithelial cells	11/176	73/8034	4.47e-07	1.14e-05	9.2e-06	ARPC2/ITGB1/ACTG1/ACTB/ARPC4/VCL/ARPC3/ARPC5L/ARPC5/PXN/CDC42	11	T5
hsa04666	Fc gamma R-mediated phagocytosis	11/176	93/8034	5.24e-06	7.86e-05	6.33e-05	FCGR3A/ARPC2/LYN/ARPC4/CFL1/RAC2/ARPC3/ARPC5L/ARPC5/VASP/CDC42	11	T5
hsa04530	Tight junction	11/176	161/8034	0.0007892	0.00605053	0.00487366	ITGB1/ACTG1/MYL12A/ACTB/LLGL2/MSN/ACTN4/VASP/ACTR3/CDC42/SLC9A3R1	11	T5
hsa05203	Viral carcinogenesis	11/176	204/8034	0.00511619	0.0326868	0.0263289	HLA-C/HLA-A/HLA-B/LYN/HLA-E/ACTN4/PXN/HLA-F/CDC42/YWHAQ/JAK1	11	T5
hsa05135	Yersinia infection	10/176	130/8034	0.000543537	0.00447434	0.00360404	ITGB1/ACTG1/ACTB/RAC2/PXN/ZAP70/PKN1/ACTR3/CDC42/MAP2K2	10	T5
hsa05152	Tuberculosis	10/176	180/8034	0.00609842	0.0368509	0.0296831	FCGR3A/FCER1G/ITGB2/ITGAM/TGFB1/LSP1/CTSD/HLA-DPB1/CEBPB/JAK1	10	T5
hsa05167	Kaposi sarcoma-associated herpesvirus infection	10/176	189/8034	0.00850269	0.047698	0.0384204	HLA-C/HLA-A/HLA-B/LYN/UBB/GNG2/HLA-E/HLA-F/MAP2K2/JAK1	10	T5
hsa04151	PI3K-Akt signaling pathway	10/176	354/8034	0.24832	0.607591	0.48941	ITGB1/GNG2/COL6A2/IL2RB/PKN1/DDIT4/ITGB7/YWHAQ/MAP2K2/JAK1	10	T5
hsa04390	Hippo signaling pathway	9/176	157/8034	0.00748133	0.0430176	0.0346504	ITGB2/ACTG1/ACTB/TGFB1/LLGL2/PPP1CA/RASSF1/ID2/YWHAQ	9	T5
hsa04010	MAPK signaling pathway	9/176	294/8034	0.195879	0.541386	0.436082	FLNA/RAP1B/TGFB1/MAP3K8/RAC2/PTPN7/TAOK3/CDC42/MAP2K2	9	T5
hsa05330	Allograft rejection	8/176	38/8034	1.26e-06	2.43e-05	1.96e-05	GZMB/PRF1/HLA-C/HLA-A/HLA-B/HLA-E/HLA-DPB1/HLA-F	8	T5
hsa04940	Type I diabetes mellitus	8/176	43/8034	3.41e-06	5.6e-05	4.51e-05	GZMB/PRF1/HLA-C/HLA-A/HLA-B/HLA-E/HLA-DPB1/HLA-F	8	T5
hsa05320	Autoimmune thyroid disease	8/176	53/8034	1.73e-05	0.000220894	0.000177928	GZMB/PRF1/HLA-C/HLA-A/HLA-B/HLA-E/HLA-DPB1/HLA-F	8	T5
hsa04520	Adherens junction	8/176	71/8034	0.000148389	0.00148389	0.00119526	ACTG1/ACTB/RAC2/VCL/YES1/ACTN4/CDC42/IQGAP1	8	T5
hsa05140	Leishmaniasis	8/176	77/8034	0.000262508	0.00241508	0.00194533	FCGR3A/CYBA/ITGB2/ITGAM/ITGB1/TGFB1/HLA-DPB1/JAK1	8	T5
hsa04210	Apoptosis	8/176	136/8034	0.00987923	0.0516414	0.0415968	GZMB/PRF1/CTSW/ACTG1/ACTB/CTSC/CTSD/MAP2K2	8	T5
hsa04218	Cellular senescence	8/176	156/8034	0.0211118	0.0990964	0.0798214	HLA-C/HLA-A/HLA-B/TGFB1/HLA-E/PPP1CA/HLA-F/MAP2K2	8	T5
hsa04022	cGMP-PKG signaling pathway	8/176	167/8034	0.0301747	0.133465	0.107505	ADRB2/PPP1CA/VASP/ATP2B4/MEF2D/ADCY7/MAP2K2/PPP1R12A	8	T5
hsa05202	Transcriptional misregulation in cancer	8/176	192/8034	0.059936	0.245096	0.197423	GZMB/ITGAM/ZBTB16/IL2RB/CEBPB/KLF3/ID2/ITGB7	8	T5
hsa04024	cAMP signaling pathway	8/176	216/8034	0.101682	0.343923	0.277027	RAP1B/ADRB2/RAC2/PPP1CA/ATP2B4/ADCY7/MAP2K2/PPP1R12A	8	T5
hsa04060	Cytokine-cytokine receptor interaction	8/176	294/8034	0.316044	0.673056	0.542141	CX3CR1/CCL5/CCL4/TGFB1/TNFRSF1B/CCL3/IL2RB/XCL2	8	T5
hsa03050	Proteasome	7/176	46/8034	5.59e-05	0.00058462	0.000470907	PSME1/PSMB8/ADRM1/PSMB10/PSMD8/POMP/PSMB9	7	T5
hsa05414	Dilated cardiomyopathy (DCM)	7/176	96/8034	0.00498174	0.0326868	0.0263289	ITGB1/ACTG1/ACTB/TGFB1/ADCY7/ITGB7/TPM4	7	T5
hsa04061	Viral protein interaction with cytokine and cytokine receptor	7/176	100/8034	0.00622123	0.0368509	0.0296831	CX3CR1/CCL5/CCL4/TNFRSF1B/CCL3/IL2RB/XCL2	7	T5
hsa04659	Th17 cell differentiation	7/176	107/8034	0.0089252	0.0488761	0.0393693	CD247/TGFB1/TBX21/HLA-DPB1/ZAP70/IL2RB/JAK1	7	T5
hsa04142	Lysosome	7/176	128/8034	0.0221407	0.101847	0.0820373	CTSW/GNPTAB/CD63/CTSC/LITAF/CTSD/IGF2R	7	T5
hsa04921	Oxytocin signaling pathway	7/176	154/8034	0.0521922	0.218258	0.175805	ACTG1/ACTB/CD38/PPP1CA/ADCY7/MAP2K2/PPP1R12A	7	T5
hsa04014	Ras signaling pathway	7/176	232/8034	0.246353	0.607591	0.48941	RAP1B/GNG2/RAC2/RASSF1/ZAP70/CDC42/MAP2K2	7	T5
hsa05012	Parkinson disease	7/176	249/8034	0.304489	0.673056	0.542141	UBB/NDUFB2/NDUFB7/CYC1/ADRM1/PSMD8/NFE2L2	7	T5
hsa05016	Huntington disease	7/176	306/8034	0.508521	0.812221	0.654238	NDUFB2/NDUFB7/CYC1/ADRM1/DCTN3/POLR2G/PSMD8	7	T5
hsa05133	Pertussis	6/176	76/8034	0.00624862	0.0368509	0.0296831	ITGB2/ITGAM/ITGB1/IRF8/IRF1/CFL1	6	T5
hsa05410	Hypertrophic cardiomyopathy (HCM)	6/176	90/8034	0.0138631	0.070856	0.057074	ITGB1/ACTG1/ACTB/TGFB1/ITGB7/TPM4	6	T5
hsa04658	Th1 and Th2 cell differentiation	6/176	92/8034	0.0153226	0.0766131	0.0617113	CD247/TBX21/HLA-DPB1/ZAP70/IL2RB/JAK1	6	T5
hsa05323	Rheumatoid arthritis	6/176	93/8034	0.016091	0.078743	0.0634268	ITGB2/CCL5/ITGAL/TGFB1/CCL3/HLA-DPB1	6	T5
hsa05150	Staphylococcus aureus infection	6/176	96/8034	0.0185552	0.0889102	0.0716165	FCGR3A/ITGB2/ITGAM/ITGAL/SELPLG/HLA-DPB1	6	T5
hsa05146	Amoebiasis	6/176	102/8034	0.0242343	0.109292	0.0880339	ITGB2/ITGAM/TGFB1/VCL/ACTN4/SERPINB6	6	T5
hsa04380	Osteoclast differentiation	6/176	128/8034	0.0618069	0.245096	0.197423	FCGR3A/TYROBP/CYBA/TGFB1/FOSL2/JAK1	6	T5
hsa05418	Fluid shear stress and atherosclerosis	6/176	139/8034	0.0844982	0.305171	0.245813	CYBA/ACTG1/ACTB/GSTP1/RAC2/NFE2L2	6	T5
hsa05225	Hepatocellular carcinoma	6/176	168/8034	0.162998	0.499862	0.402635	ACTG1/ACTB/TGFB1/GSTP1/MAP2K2/NFE2L2	6	T5
hsa05164	Influenza A	6/176	170/8034	0.169311	0.506292	0.407814	ACTG1/ACTB/CCL5/HLA-DPB1/MAP2K2/JAK1	6	T5
hsa04714	Thermogenesis	6/176	231/8034	0.394852	0.721692	0.581317	ACTG1/ACTB/NDUFB2/NDUFB7/CYC1/ADCY7	6	T5
hsa05010	Alzheimer disease	6/176	369/8034	0.825698	0.919569	0.740706	NDUFB2/NDUFB7/CYC1/ADRM1/PSMD8/MAP2K2	6	T5
hsa05144	Malaria	5/176	50/8034	0.00455088	0.0307854	0.0247974	ITGB2/ITGAL/TGFB1/KLRB1/CD81	5	T5
hsa04370	VEGF signaling pathway	5/176	59/8034	0.00918646	0.0491369	0.0395794	RAC2/PXN/SH2D2A/CDC42/MAP2K2	5	T5
hsa04662	B cell receptor signaling pathway	5/176	82/8034	0.033601	0.145816	0.117453	LYN/IFITM1/RAC2/CD81/MAP2K2	5	T5
hsa05142	Chagas disease (American trypanosomiasis)	5/176	102/8034	0.0728456	0.279242	0.224927	CD247/CCL5/TGFB1/CCL3/CALR	5	T5
hsa04620	Toll-like receptor signaling pathway	5/176	104/8034	0.0777426	0.2884	0.232304	CCL5/CCL4/CCL3/MAP3K8/MAP2K2	5	T5
hsa04660	T cell receptor signaling pathway	5/176	104/8034	0.0777426	0.2884	0.232304	CD247/MAP3K8/ZAP70/CDC42/MAP2K2	5	T5
hsa04668	TNF signaling pathway	5/176	112/8034	0.0990474	0.340014	0.273878	CCL5/TNFRSF1B/IRF1/MAP3K8/CEBPB	5	T5
hsa04071	Sphingolipid signaling pathway	5/176	119/8034	0.119853	0.399511	0.321803	S1PR5/FCER1G/CTSD/RAC2/MAP2K2	5	T5
hsa04261	Adrenergic signaling in cardiomyocytes	5/176	149/8034	0.228104	0.58026	0.467395	ADRB2/PPP1CA/ATP2B4/ADCY7/TPM4	5	T5
hsa04932	Non-alcoholic fatty liver disease (NAFLD)	5/176	149/8034	0.228104	0.58026	0.467395	TGFB1/NDUFB2/NDUFB7/CYC1/CDC42	5	T5
hsa04141	Protein processing in endoplasmic reticulum	5/176	167/8034	0.30328	0.673056	0.542141	RRBP1/CALR/LMAN2/NFE2L2/PDIA3	5	T5
hsa04360	Axon guidance	5/176	181/8034	0.364134	0.703788	0.566896	ITGB1/MYL12A/CFL1/RAC2/CDC42	5	T5
hsa04621	NOD-like receptor signaling pathway	5/176	181/8034	0.364134	0.703788	0.566896	CYBA/CCL5/PKN1/TXNIP/JAK1	5	T5
hsa04664	Fc epsilon RI signaling pathway	4/176	68/8034	0.0614714	0.245096	0.197423	FCER1G/LYN/RAC2/MAP2K2	4	T5
hsa05211	Renal cell carcinoma	4/176	69/8034	0.0641879	0.250224	0.201554	RAP1B/TGFB1/CDC42/MAP2K2	4	T5
hsa05212	Pancreatic cancer	4/176	76/8034	0.0849173	0.305171	0.245813	TGFB1/RAC2/CDC42/JAK1	4	T5
hsa05412	Arrhythmogenic right ventricular cardiomyopathy (ARVC)	4/176	77/8034	0.088117	0.311799	0.251151	ITGB1/ACTG1/ACTB/ITGB7	4	T5
hsa04512	ECM-receptor interaction	4/176	88/8034	0.126961	0.417158	0.336017	ITGB1/COL6A2/ITGB7/CD47	4	T5
hsa05235	PD-L1 expression and PD-1 checkpoint pathway in cancer	4/176	89/8034	0.130803	0.423728	0.341309	CD247/ZAP70/MAP2K2/JAK1	4	T5
hsa04970	Salivary secretion	4/176	93/8034	0.14664	0.463456	0.37331	CD38/ADRB2/ATP2B4/ADCY7	4	T5
hsa04640	Hematopoietic cell lineage	4/176	99/8034	0.171699	0.506292	0.407814	ITGAM/CD38/CD7/HLA-DPB1	4	T5
hsa04972	Pancreatic secretion	4/176	102/8034	0.184756	0.518218	0.417421	RAP1B/CD38/ATP2B4/ADCY7	4	T5
hsa04928	Parathyroid hormone synthesis, secretion and action	4/176	106/8034	0.20265	0.548346	0.441688	MEF2D/ADCY7/SLC9A3R1/AKAP13	4	T5
hsa05145	Toxoplasmosis	4/176	112/8034	0.230391	0.58026	0.467395	ITGB1/TGFB1/HLA-DPB1/JAK1	4	T5
hsa04722	Neurotrophin signaling pathway	4/176	119/8034	0.263854	0.638804	0.514552	MATK/RAP1B/CDC42/MAP2K2	4	T5
hsa04110	Cell cycle	4/176	124/8034	0.288295	0.669776	0.539499	TGFB1/TFDP2/YWHAQ/CDKN2D	4	T5
hsa04926	Relaxin signaling pathway	4/176	129/8034	0.313045	0.673056	0.542141	TGFB1/GNG2/ADCY7/MAP2K2	4	T5
hsa04270	Vascular smooth muscle contraction	4/176	135/8034	0.342987	0.703788	0.566896	PPP1CA/ADCY7/MAP2K2/PPP1R12A	4	T5
hsa04140	Autophagy - animal	4/176	137/8034	0.352995	0.703788	0.566896	CTSD/HMGB1/DDIT4/MAP2K2	4	T5
hsa04371	Apelin signaling pathway	4/176	137/8034	0.352995	0.703788	0.566896	GNG2/MEF2D/ADCY7/MAP2K2	4	T5
hsa04072	Phospholipase D signaling pathway	4/176	148/8034	0.407913	0.721692	0.581317	FCER1G/DGKD/ADCY7/MAP2K2	4	T5
hsa04723	Retrograde endocannabinoid signaling	4/176	148/8034	0.407913	0.721692	0.581317	GNG2/NDUFB2/NDUFB7/ADCY7	4	T5
hsa05160	Hepatitis C	4/176	155/8034	0.442433	0.765109	0.616289	CD81/YWHAQ/MAP2K2/JAK1	4	T5
hsa05161	Hepatitis B	4/176	162/8034	0.476349	0.793915	0.639492	TGFB1/YWHAQ/MAP2K2/JAK1	4	T5
hsa04020	Calcium signaling pathway	4/176	196/8034	0.627166	0.867231	0.698548	CD38/ADRB2/ATP2B4/ADCY7	4	T5
hsa05206	MicroRNAs in cancer	4/176	310/8034	0.913383	0.937848	0.755429	ZEB2/RASSF1/DDIT4/MAP2K2	4	T5
hsa04080	Neuroactive ligand-receptor interaction	4/176	340/8034	0.944483	0.953443	0.76799	S1PR5/GZMA/NMUR1/ADRB2	4	T5
hsa00533	Glycosaminoglycan biosynthesis - keratan sulfate	3/176	14/8034	0.00314885	0.0219465	0.0176777	B3GNT7/CHST2/B4GALT1	3	T5
hsa05020	Prion diseases	3/176	35/8034	0.0405224	0.172595	0.139024	NCAM1/CCL5/MAP2K2	3	T5
hsa04672	Intestinal immune network for IgA production	3/176	49/8034	0.0916834	0.319503	0.257357	TGFB1/HLA-DPB1/ITGB7	3	T5
hsa04623	Cytosolic DNA-sensing pathway	3/176	63/8034	0.159446	0.495574	0.399181	CCL5/CCL4/ZBP1	3	T5
hsa05321	Inflammatory bowel disease (IBD)	3/176	65/8034	0.170142	0.506292	0.407814	TGFB1/TBX21/HLA-DPB1	3	T5
hsa04720	Long-term potentiation	3/176	67/8034	0.181039	0.514061	0.414072	RAP1B/PPP1CA/MAP2K2	3	T5
hsa05221	Acute myeloid leukemia	3/176	67/8034	0.181039	0.514061	0.414072	ITGAM/ZBTB16/MAP2K2	3	T5
hsa05120	Epithelial cell signaling in Helicobacter pylori infection	3/176	70/8034	0.197724	0.541386	0.436082	LYN/CCL5/CDC42	3	T5
hsa04971	Gastric acid secretion	3/176	76/8034	0.232104	0.58026	0.467395	ACTG1/ACTB/ADCY7	3	T5
hsa05220	Chronic myeloid leukemia	3/176	76/8034	0.232104	0.58026	0.467395	CTBP2/TGFB1/MAP2K2	3	T5
hsa05210	Colorectal cancer	3/176	86/8034	0.291394	0.670207	0.539847	TGFB1/RAC2/MAP2K2	3	T5
hsa04912	GnRH signaling pathway	3/176	93/8034	0.333553	0.697429	0.561774	CDC42/ADCY7/MAP2K2	3	T5
hsa05231	Choline metabolism in cancer	3/176	98/8034	0.363646	0.703788	0.566896	RAC2/DGKD/MAP2K2	3	T5
hsa04933	AGE-RAGE signaling pathway in diabetic complications	3/176	100/8034	0.375633	0.719964	0.579925	TGFB1/CDC42/DIAPH1	3	T5
hsa04064	NF-kappa B signaling pathway	3/176	104/8034	0.399465	0.721692	0.581317	LYN/CCL4/ZAP70	3	T5
hsa04625	C-type lectin receptor signaling pathway	3/176	104/8034	0.399465	0.721692	0.581317	FCER1G/IRF1/LSP1	3	T5
hsa04919	Thyroid hormone signaling pathway	3/176	121/8034	0.497216	0.805649	0.648944	ACTG1/ACTB/MAP2K2	3	T5
hsa04114	Oocyte meiosis	3/176	128/8034	0.535154	0.831658	0.669894	PPP1CA/ADCY7/YWHAQ	3	T5
hsa04068	FoxO signaling pathway	3/176	131/8034	0.550916	0.843019	0.679045	TGFB1/CDKN2D/MAP2K2	3	T5
hsa00190	Oxidative phosphorylation	3/176	133/8034	0.561249	0.843019	0.679045	NDUFB2/NDUFB7/CYC1	3	T5
hsa05322	Systemic lupus erythematosus	3/176	136/8034	0.576478	0.843019	0.679045	FCGR3A/ACTN4/HLA-DPB1	3	T5
hsa04915	Estrogen signaling pathway	3/176	138/8034	0.586448	0.843019	0.679045	CTSD/ADCY7/MAP2K2	3	T5
hsa05162	Measles	3/176	138/8034	0.586448	0.843019	0.679045	MSN/IL2RB/JAK1	3	T5
hsa04550	Signaling pathways regulating pluripotency of stem cells	3/176	143/8034	0.610714	0.867063	0.698412	ID2/MAP2K2/JAK1	3	T5
hsa04934	Cushing syndrome	3/176	155/8034	0.665002	0.879025	0.708048	RAP1B/ADCY7/MAP2K2	3	T5
hsa04217	Necroptosis	3/176	159/8034	0.681838	0.896129	0.721825	ZBP1/HMGB1/JAK1	3	T5
hsa05310	Asthma	2/176	31/8034	0.147097	0.463456	0.37331	FCER1G/HLA-DPB1	2	T5
hsa00760	Nicotinate and nicotinamide metabolism	2/176	35/8034	0.178161	0.514061	0.414072	CD38/SIRT2	2	T5
hsa00513	Various types of N-glycan biosynthesis	2/176	39/8034	0.210113	0.561929	0.452629	B4GALT1/MGAT1	2	T5
hsa05219	Bladder cancer	2/176	41/8034	0.226303	0.58026	0.467395	RASSF1/MAP2K2	2	T5
hsa00514	Other types of O-glycan biosynthesis	2/176	47/8034	0.275252	0.659457	0.531188	LFNG/B4GALT1	2	T5
hsa00510	N-Glycan biosynthesis	2/176	50/8034	0.299725	0.673056	0.542141	B4GALT1/MGAT1	2	T5
hsa05110	Vibrio cholerae infection	2/176	50/8034	0.299725	0.673056	0.542141	ACTG1/ACTB	2	T5
hsa04913	Ovarian steroidogenesis	2/176	51/8034	0.307858	0.673056	0.542141	AKR1C3/ADCY7	2	T5
hsa04330	Notch signaling pathway	2/176	53/8034	0.324065	0.683807	0.550801	CTBP2/LFNG	2	T5
hsa04923	Regulation of lipolysis in adipocytes	2/176	56/8034	0.348188	0.703788	0.566896	ADRB2/ADCY7	2	T5
hsa05134	Legionellosis	2/176	57/8034	0.356168	0.703788	0.566896	ITGB2/ITGAM	2	T5
hsa04730	Long-term depression	2/176	60/8034	0.379891	0.721692	0.581317	LYN/MAP2K2	2	T5
hsa00590	Arachidonic acid metabolism	2/176	63/8034	0.403243	0.721692	0.581317	PTGDS/AKR1C3	2	T5
hsa05223	Non-small cell lung cancer	2/176	68/8034	0.441206	0.765109	0.616289	RASSF1/MAP2K2	2	T5
hsa04917	Prolactin signaling pathway	2/176	70/8034	0.456022	0.771213	0.621206	IRF1/MAP2K2	2	T5
hsa03320	PPAR signaling pathway	2/176	77/8034	0.506041	0.812221	0.654238	SCP2/DBI	2	T5
hsa00983	Drug metabolism - other enzymes	2/176	79/8034	0.51978	0.813261	0.655075	GSTP1/UPP1	2	T5
hsa01521	EGFR tyrosine kinase inhibitor resistance	2/176	79/8034	0.51978	0.813261	0.655075	MAP2K2/JAK1	2	T5
hsa04146	Peroxisome	2/176	83/8034	0.546488	0.843019	0.679045	SCP2/PRDX5	2	T5
hsa04610	Complement and coagulation cascades	2/176	85/8034	0.55945	0.843019	0.679045	ITGB2/ITGAM	2	T5
hsa04260	Cardiac muscle contraction	2/176	87/8034	0.572149	0.843019	0.679045	CYC1/TPM4	2	T5
hsa04540	Gap junction	2/176	88/8034	0.578398	0.843019	0.679045	ADCY7/MAP2K2	2	T5
hsa04727	GABAergic synapse	2/176	89/8034	0.584581	0.843019	0.679045	GNG2/ADCY7	2	T5
hsa05032	Morphine addiction	2/176	91/8034	0.596747	0.852496	0.686678	GNG2/ADCY7	2	T5
hsa04350	TGF-beta signaling pathway	2/176	94/8034	0.614495	0.867079	0.698425	TGFB1/ID2	2	T5
hsa04713	Circadian entrainment	2/176	97/8034	0.631643	0.867231	0.698548	GNG2/ADCY7	2	T5
hsa05215	Prostate cancer	2/176	97/8034	0.631643	0.867231	0.698548	GSTP1/MAP2K2	2	T5
hsa00564	Glycerophospholipid metabolism	2/176	98/8034	0.637226	0.867231	0.698548	LPCAT1/DGKD	2	T5
hsa01522	Endocrine resistance	2/176	98/8034	0.637226	0.867231	0.698548	ADCY7/MAP2K2	2	T5
hsa04925	Aldosterone synthesis and secretion	2/176	98/8034	0.637226	0.867231	0.698548	ATP2B4/ADCY7	2	T5
hsa04914	Progesterone-mediated oocyte maturation	2/176	99/8034	0.642743	0.869594	0.700451	STK10/ADCY7	2	T5
hsa04750	Inflammatory mediator regulation of TRP channels	2/176	100/8034	0.648195	0.871841	0.702261	PPP1CA/ADCY7	2	T5
hsa04916	Melanogenesis	2/176	101/8034	0.65358	0.873974	0.703979	ADCY7/MAP2K2	2	T5
hsa04725	Cholinergic synapse	2/176	113/8034	0.71319	0.907789	0.731216	GNG2/ADCY7	2	T5
hsa04724	Glutamatergic synapse	2/176	114/8034	0.717751	0.907789	0.731216	GNG2/ADCY7	2	T5
hsa04935	Growth hormone synthesis, secretion and action	2/176	119/8034	0.739651	0.913098	0.735493	ADCY7/MAP2K2	2	T5
hsa04728	Dopaminergic synapse	2/176	132/8034	0.789924	0.916023	0.737849	GNG2/PPP1CA	2	T5
hsa05017	Spinocerebellar ataxia	2/176	133/8034	0.793415	0.916023	0.737849	ADRM1/PSMD8	2	T5
hsa04910	Insulin signaling pathway	2/176	137/8034	0.806875	0.916023	0.737849	PPP1CA/MAP2K2	2	T5
hsa04120	Ubiquitin mediated proteolysis	2/176	140/8034	0.816456	0.916023	0.737849	UBE2F/UBB	2	T5
hsa05226	Gastric cancer	2/176	149/8034	0.842706	0.919569	0.740706	TGFB1/MAP2K2	2	T5
hsa04150	mTOR signaling pathway	2/176	155/8034	0.858276	0.919569	0.740706	DDIT4/MAP2K2	2	T5
hsa04310	Wnt signaling pathway	2/176	160/8034	0.870167	0.919569	0.740706	CTBP2/RAC2	2	T5
hsa04630	JAK-STAT signaling pathway	2/176	162/8034	0.874663	0.919569	0.740706	IL2RB/JAK1	2	T5
hsa05034	Alcoholism	2/176	187/8034	0.919989	0.939477	0.756741	GNG2/PPP1CA	2	T5
hsa00604	Glycosphingolipid biosynthesis - ganglio series	1/176	15/8034	0.282907	0.663965	0.534818	ST3GAL5	1	T5
hsa00120	Primary bile acid biosynthesis	1/176	17/8034	0.314041	0.673056	0.542141	SCP2	1	T5
hsa00532	Glycosaminoglycan biosynthesis - chondroitin sulfate / dermatan sulfate	1/176	20/8034	0.358239	0.703788	0.566896	CHST12	1	T5
hsa00900	Terpenoid backbone biosynthesis	1/176	22/8034	0.386119	0.721692	0.581317	MVD	1	T5
hsa00515	Mannose type O-glycan biosynthesis	1/176	23/8034	0.399604	0.721692	0.581317	B4GALT1	1	T5
hsa03060	Protein export	1/176	23/8034	0.399604	0.721692	0.581317	SEC11A	1	T5
hsa00790	Folate biosynthesis	1/176	26/8034	0.438318	0.765109	0.616289	AKR1C3	1	T5
hsa00601	Glycosphingolipid biosynthesis - lacto and neolacto series	1/176	27/8034	0.450662	0.767795	0.618453	B4GALT1	1	T5
hsa01040	Biosynthesis of unsaturated fatty acids	1/176	27/8034	0.450662	0.767795	0.618453	SCP2	1	T5
hsa04392	Hippo signaling pathway - multiple species	1/176	29/8034	0.474548	0.793915	0.639492	RASSF1	1	T5
hsa00052	Galactose metabolism	1/176	31/8034	0.497401	0.805649	0.648944	B4GALT1	1	T5
hsa03020	RNA polymerase	1/176	31/8034	0.497401	0.805649	0.648944	POLR2G	1	T5
hsa04710	Circadian rhythm	1/176	31/8034	0.497401	0.805649	0.648944	BHLHE40	1	T5
hsa03410	Base excision repair	1/176	33/8034	0.519265	0.813261	0.655075	HMGB1	1	T5
hsa05216	Thyroid cancer	1/176	37/8034	0.560197	0.843019	0.679045	MAP2K2	1	T5
hsa05340	Primary immunodeficiency	1/176	38/8034	0.569876	0.843019	0.679045	ZAP70	1	T5
hsa00565	Ether lipid metabolism	1/176	49/8034	0.663333	0.879025	0.708048	LPCAT1	1	T5
hsa04961	Endocrine and other factor-regulated calcium reabsorption	1/176	53/8034	0.692054	0.904389	0.728478	ATP2B4	1	T5
hsa00240	Pyrimidine metabolism	1/176	57/8034	0.718337	0.907789	0.731216	UPP1	1	T5
hsa00480	Glutathione metabolism	1/176	57/8034	0.718337	0.907789	0.731216	GSTP1	1	T5
hsa01212	Fatty acid metabolism	1/176	57/8034	0.718337	0.907789	0.731216	SCP2	1	T5
hsa05014	Amyotrophic lateral sclerosis (ALS)	1/176	57/8034	0.718337	0.907789	0.731216	TNFRSF1B	1	T5
hsa05213	Endometrial cancer	1/176	58/8034	0.724552	0.910639	0.733512	MAP2K2	1	T5
hsa04978	Mineral absorption	1/176	59/8034	0.73063	0.913098	0.735493	ATP2B4	1	T5
hsa00140	Steroid hormone biosynthesis	1/176	61/8034	0.742389	0.913098	0.735493	AKR1C3	1	T5
hsa00561	Glycerolipid metabolism	1/176	61/8034	0.742389	0.913098	0.735493	DGKD	1	T5
hsa04213	Longevity regulating pathway - multiple species	1/176	62/8034	0.748075	0.915198	0.737185	ADCY7	1	T5
hsa04929	GnRH secretion	1/176	64/8034	0.759077	0.916023	0.737849	MAP2K2	1	T5
hsa04927	Cortisol synthesis and secretion	1/176	65/8034	0.764397	0.916023	0.737849	ADCY7	1	T5
hsa04137	Mitophagy - animal	1/176	68/8034	0.779667	0.916023	0.737849	UBB	1	T5
hsa04920	Adipocytokine signaling pathway	1/176	69/8034	0.784535	0.916023	0.737849	TNFRSF1B	1	T5
hsa04924	Renin secretion	1/176	69/8034	0.784535	0.916023	0.737849	ADRB2	1	T5
hsa05031	Amphetamine addiction	1/176	69/8034	0.784535	0.916023	0.737849	PPP1CA	1	T5
hsa05230	Central carbon metabolism in cancer	1/176	70/8034	0.789296	0.916023	0.737849	MAP2K2	1	T5
hsa00982	Drug metabolism - cytochrome P450	1/176	71/8034	0.793952	0.916023	0.737849	GSTP1	1	T5
hsa05218	Melanoma	1/176	72/8034	0.798507	0.916023	0.737849	MAP2K2	1	T5
hsa01524	Platinum drug resistance	1/176	73/8034	0.802961	0.916023	0.737849	GSTP1	1	T5
hsa04918	Thyroid hormone synthesis	1/176	75/8034	0.811577	0.916023	0.737849	ADCY7	1	T5
hsa05214	Glioma	1/176	75/8034	0.811577	0.916023	0.737849	MAP2K2	1	T5
hsa00980	Metabolism of xenobiotics by cytochrome P450	1/176	76/8034	0.815744	0.916023	0.737849	GSTP1	1	T5
hsa03018	RNA degradation	1/176	79/8034	0.827702	0.919569	0.740706	CNOT2	1	T5
hsa05204	Chemical carcinogenesis	1/176	82/8034	0.838888	0.919569	0.740706	GSTP1	1	T5
hsa04012	ErbB signaling pathway	1/176	85/8034	0.849352	0.919569	0.740706	MAP2K2	1	T5
hsa04911	Insulin secretion	1/176	86/8034	0.852687	0.919569	0.740706	ADCY7	1	T5
hsa04211	Longevity regulating pathway	1/176	89/8034	0.86226	0.919569	0.740706	ADCY7	1	T5
hsa04976	Bile secretion	1/176	90/8034	0.865311	0.919569	0.740706	ADCY7	1	T5
hsa03015	mRNA surveillance pathway	1/176	91/8034	0.868295	0.919569	0.740706	PPP1CA	1	T5
hsa05222	Small cell lung cancer	1/176	92/8034	0.871213	0.919569	0.740706	ITGB1	1	T5
hsa04657	IL-17 signaling pathway	1/176	94/8034	0.876858	0.919569	0.740706	CEBPB	1	T5
hsa04974	Protein digestion and absorption	1/176	95/8034	0.879588	0.919569	0.740706	COL6A2	1	T5
hsa04070	Phosphatidylinositol signaling system	1/176	97/8034	0.884868	0.920903	0.74178	DGKD	1	T5
hsa04931	Insulin resistance	1/176	108/8034	0.91005	0.937848	0.755429	PPP1CA	1	T5
hsa04066	HIF-1 signaling pathway	1/176	109/8034	0.912047	0.937848	0.755429	MAP2K2	1	T5
hsa04726	Serotonergic synapse	1/176	115/8034	0.923138	0.939477	0.756741	GNG2	1	T5
hsa00230	Purine metabolism	1/176	130/8034	0.945152	0.953443	0.76799	ADCY7	1	T5
hsa05224	Breast cancer	1/176	147/8034	0.962612	0.966815	0.778762	MAP2K2	1	T5
hsa04740	Olfactory transduction	1/176	448/8034	0.999963	0.999963	0.805462	NCALD	1	T5
hsa04145	Phagosome	13/130	152/8034	9.27e-07	9.92e-05	7.8e-05	CYBB/NCF2/OLR1/FCGR3B/FCAR/ITGAM/ACTB/NCF4/NCF1/CTSS/ATP6V0B/LAMP2/MPO	13	T6
hsa05132	Salmonella infection	12/130	206/8034	0.000118697	0.00282234	0.00222122	MYL6/FGD4/ARPC5/CXCL8/ACTB/PAK1/SNX18/TXN/MAP2K3/MAPK14/FOS/PFN1	12	T6
hsa04670	Leukocyte transendothelial migration	11/130	113/8034	1.87e-06	0.000120472	9.48e-05	CYBB/MMP9/NCF2/ITGAM/ACTN1/ACTB/NCF4/NCF1/VCL/MAPK14/VASP	11	T6
hsa04380	Osteoclast differentiation	11/130	128/8034	6.36e-06	0.000226822	0.000178513	NCF2/FCGR3B/SPI1/TYROBP/LILRB3/SYK/NCF4/NCF1/MAPK14/IFNGR2/FOS	11	T6
hsa05152	Tuberculosis	11/130	180/8034	0.000151172	0.00323508	0.00254605	CAMP/FCER1G/FCGR3B/ITGAM/SYK/CTSS/ATP6V0B/LAMP2/MAPK14/IFNGR2/CTSD	11	T6
hsa05202	Transcriptional misregulation in cancer	11/130	192/8034	0.000266134	0.00438098	0.0034479	MMP9/ITGAM/SPI1/CXCL8/BCL2A1/H3F3A/DEFA4/IGF1R/DEFA3/DUSP6/MPO	11	T6
hsa05140	Leishmaniasis	10/130	77/8034	3.81e-07	8.14e-05	6.41e-05	CYBB/NCF2/PTGS2/FCGR3B/ITGAM/NCF4/NCF1/MAPK14/IFNGR2/FOS	10	T6
hsa04666	Fc gamma R-mediated phagocytosis	10/130	93/8034	2.25e-06	0.000120472	9.48e-05	MARCKS/FCGR3B/GSN/ARPC5/SYK/NCF1/PAK1/LYN/LIMK2/VASP	10	T6
hsa05150	Staphylococcus aureus infection	10/130	96/8034	3.02e-06	0.000129147	0.000101641	FPR1/CAMP/C5AR1/FCGR3B/FCAR/ITGAM/FPR2/C3AR1/DEFA4/DEFA3	10	T6
hsa05131	Shigellosis	10/130	242/8034	0.00575127	0.0512821	0.0403598	ARPC5/ACTN1/CXCL8/ACTB/H3F3A/VCL/MAPK14/FOXO3/PFN1/UBE2D1	10	T6
hsa04657	IL-17 signaling pathway	9/130	94/8034	1.92e-05	0.000586944	0.000461933	LCN2/MMP9/S100A9/S100A8/PTGS2/CXCL1/CXCL8/MAPK14/FOS	9	T6
hsa05135	Yersinia infection	9/130	130/8034	0.000243561	0.00434351	0.0034184	CXCL8/ACTB/ACTR2/SKAP2/MAP2K3/MAPK14/FOS/GNAQ/ACTR3	9	T6
hsa04621	NOD-like receptor signaling pathway	9/130	181/8034	0.00260178	0.0347988	0.0273871	CYBB/CAMP/CXCL1/CXCL8/NAMPT/DEFA4/TXN/MAPK14/DEFA3	9	T6
hsa05167	Kaposi sarcoma-associated herpesvirus infection	9/130	189/8034	0.00347648	0.0391561	0.0308164	PTGS2/CXCL1/CXCL8/SYK/HIF1A/LYN/MAPK14/FOS/GNB2	9	T6
hsa04015	Rap1 signaling pathway	9/130	210/8034	0.00689323	0.0546352	0.0429987	FPR1/ITGAM/ACTB/IGF1R/MAP2K3/MAPK14/VASP/GNAQ/PFN1	9	T6
hsa04810	Regulation of actin cytoskeleton	9/130	214/8034	0.00776604	0.057308	0.0451022	ITGAM/GSN/ARPC5/ACTN1/ACTB/PAK1/VCL/LIMK2/PFN1	9	T6
hsa05146	Amoebiasis	8/130	102/8034	0.000232175	0.00434351	0.0034184	ARG1/SERPINB10/ITGAM/CXCL1/ACTN1/CXCL8/VCL/GNAQ	8	T6
hsa04062	Chemokine signaling pathway	8/130	189/8034	0.0114438	0.0789991	0.0621734	CXCL1/CXCL8/NCF1/FGR/PAK1/LYN/FOXO3/GNB2	8	T6
hsa04664	Fc epsilon RI signaling pathway	7/130	68/8034	0.000105451	0.00282082	0.00222003	FCER1G/ALOX5AP/ALOX5/SYK/LYN/MAP2K3/MAPK14	7	T6
hsa04611	Platelet activation	7/130	124/8034	0.00388013	0.0415174	0.0326748	FCER1G/SYK/ACTB/LYN/MAPK14/VASP/GNAQ	7	T6
hsa04142	Lysosome	7/130	128/8034	0.00462064	0.042992	0.0338353	CTSS/ASAH1/ATP6V0B/LAMP2/LITAF/CTSD/PSAP	7	T6
hsa05418	Fluid shear stress and atherosclerosis	7/130	139/8034	0.00720927	0.0550994	0.043364	MMP9/NCF2/ACTB/NCF1/TXN/MAPK14/FOS	7	T6
hsa05161	Hepatitis B	7/130	162/8034	0.0158914	0.100022	0.0787188	MMP9/CXCL8/MAP2K3/MAPK14/FOS/EGR3/YWHAZ	7	T6
hsa05205	Proteoglycans in cancer	7/130	205/8034	0.0483496	0.19469	0.153224	MMP9/ACTB/HIF1A/PLAUR/PAK1/IGF1R/MAPK14	7	T6
hsa05170	Human immunodeficiency virus 1 infection	7/130	212/8034	0.0560298	0.218007	0.171575	PAK1/MAP2K3/MAPK14/LIMK2/FOS/GNAQ/GNB2	7	T6
hsa05120	Epithelial cell signaling in Helicobacter pylori infection	6/130	70/8034	0.000898413	0.0137329	0.010808	CXCL1/CXCL8/PAK1/ATP6V0B/LYN/MAPK14	6	T6
hsa04610	Complement and coagulation cascades	6/130	85/8034	0.00246084	0.0347988	0.0273871	C5AR1/SERPINA1/ITGAM/PLAUR/C3AR1/CD55	6	T6
hsa04211	Longevity regulating pathway	6/130	89/8034	0.00310272	0.0377834	0.0297361	SOD2/IGF1R/CAT/FOXO3/CAMKK2/IRS2	6	T6
hsa04064	NF-kappa B signaling pathway	6/130	104/8034	0.00665916	0.0546352	0.0429987	PTGS2/CXCL1/CXCL8/SYK/BCL2A1/LYN	6	T6
hsa04625	C-type lectin receptor signaling pathway	6/130	104/8034	0.00665916	0.0546352	0.0429987	FCER1G/PTGS2/SYK/PAK1/MAPK14/EGR3	6	T6
hsa04668	TNF signaling pathway	6/130	112/8034	0.00945976	0.0674796	0.0531074	MMP9/PTGS2/CXCL1/MAP2K3/MAPK14/FOS	6	T6
hsa04068	FoxO signaling pathway	6/130	131/8034	0.0193097	0.108744	0.085583	SOD2/IGF1R/MAPK14/CAT/FOXO3/IRS2	6	T6
hsa04650	Natural killer cell mediated cytotoxicity	6/130	131/8034	0.0193097	0.108744	0.085583	FCER1G/FCGR3B/TYROBP/SYK/PAK1/IFNGR2	6	T6
hsa04140	Autophagy - animal	6/130	137/8034	0.0234967	0.125707	0.0989334	HIF1A/IGF1R/LAMP2/CTSD/CAMKK2/IRS2	6	T6
hsa04921	Oxytocin signaling pathway	6/130	154/8034	0.0385521	0.183337	0.144289	PTGS2/MYL6/ACTB/FOS/GNAQ/CAMKK2	6	T6
hsa04530	Tight junction	6/130	161/8034	0.0462104	0.192487	0.15149	MYL6/ACTN1/ACTB/ACTR2/VASP/ACTR3	6	T6
hsa05130	Pathogenic Escherichia coli infection	6/130	192/8034	0.0909108	0.286101	0.225166	ARPC5/CXCL8/ACTB/PAK1/MAPK14/FOS	6	T6
hsa04510	Focal adhesion	6/130	201/8034	0.10717	0.307431	0.241953	ACTN1/ACTB/PAK1/VCL/IGF1R/VASP	6	T6
hsa05169	Epstein-Barr virus infection	6/130	201/8034	0.10717	0.307431	0.241953	ENTPD1/SYK/LYN/MAP2K3/MAPK14/VIM	6	T6
hsa05203	Viral carcinogenesis	6/130	204/8034	0.112906	0.30956	0.243628	GSN/ACTN1/SYK/LYN/EGR3/YWHAZ	6	T6
hsa04010	MAPK signaling pathway	6/130	294/8034	0.340308	0.6271	0.493537	PAK1/IGF1R/MAP2K3/MAPK14/FOS/DUSP6	6	T6
hsa04151	PI3K-Akt signaling pathway	6/130	354/8034	0.513431	0.748658	0.589204	CSF3R/SYK/IGF1R/FOXO3/YWHAZ/GNB2	6	T6
hsa05010	Alzheimer disease	6/130	369/8034	0.554572	0.771468	0.607156	CYBB/PTGS2/ATP5F1E/RTN3/GNAQ/IRS2	6	T6
hsa04213	Longevity regulating pathway - multiple species	5/130	62/8034	0.00317804	0.0377834	0.0297361	SOD2/IGF1R/CAT/FOXO3/IRS2	5	T6
hsa05221	Acute myeloid leukemia	5/130	67/8034	0.00444853	0.042992	0.0338353	ITGAM/SPI1/BCL2A1/DUSP6/MPO	5	T6
hsa05235	PD-L1 expression and PD-1 checkpoint pathway in cancer	5/130	89/8034	0.0144399	0.0936403	0.0736963	HIF1A/MAP2K3/MAPK14/IFNGR2/FOS	5	T6
hsa05142	Chagas disease (American trypanosomiasis)	5/130	102/8034	0.0245744	0.128266	0.100948	CXCL8/MAPK14/IFNGR2/FOS/GNAQ	5	T6
hsa04071	Sphingolipid signaling pathway	5/130	119/8034	0.0434991	0.192487	0.15149	FCER1G/ASAH1/MAPK14/GNAQ/CTSD	5	T6
hsa04935	Growth hormone synthesis, secretion and action	5/130	119/8034	0.0434991	0.192487	0.15149	MAP2K3/MAPK14/FOS/GNAQ/IRS2	5	T6
hsa04210	Apoptosis	5/130	136/8034	0.0693135	0.243165	0.191375	ACTB/BCL2A1/CTSS/FOS/CTSD	5	T6
hsa04217	Necroptosis	5/130	159/8034	0.115116	0.30956	0.243628	CYBB/PYGL/GLUL/IFNGR2/FTL	5	T6
hsa05163	Human cytomegalovirus infection	5/130	225/8034	0.299754	0.589132	0.463656	PTGS2/CXCL8/MAPK14/GNAQ/GNB2	5	T6
hsa04714	Thermogenesis	5/130	231/8034	0.318869	0.598579	0.47109	ATP5F1E/ACTB/ACSL1/MAP2K3/MAPK14	5	T6
hsa05206	MicroRNAs in cancer	5/130	310/8034	0.567269	0.778176	0.612436	MMP9/MARCKS/PTGS2/VIM/IRS2	5	T6
hsa04080	Neuroactive ligand-receptor interaction	5/130	340/8034	0.64969	0.819903	0.645275	FPR1/C5AR1/FPR2/TSPO/C3AR1	5	T6
hsa04216	Ferroptosis	4/130	41/8034	0.00417136	0.0425081	0.0334545	CYBB/ACSL1/SLC40A1/FTL	4	T6
hsa00590	Arachidonic acid metabolism	4/130	63/8034	0.0186983	0.108744	0.085583	CYP4F3/PTGS2/ALOX5/LTA4H	4	T6
hsa04520	Adherens junction	4/130	71/8034	0.0276529	0.140898	0.110889	ACTN1/ACTB/VCL/IGF1R	4	T6
hsa01230	Biosynthesis of amino acids	4/130	74/8034	0.0315689	0.15711	0.123648	ARG1/TKT/TALDO1/GLUL	4	T6
hsa05133	Pertussis	4/130	76/8034	0.0343519	0.167075	0.131491	ITGAM/CXCL8/MAPK14/FOS	4	T6
hsa04662	B cell receptor signaling pathway	4/130	82/8034	0.0435345	0.192487	0.15149	LILRB3/SYK/LYN/FOS	4	T6
hsa04146	Peroxisome	4/130	83/8034	0.0451868	0.192487	0.15149	SOD2/ACSL1/CAT/FAR1	4	T6
hsa04970	Salivary secretion	4/130	93/8034	0.0636126	0.229822	0.180873	LYZ/CAMP/BST1/GNAQ	4	T6
hsa05323	Rheumatoid arthritis	4/130	93/8034	0.0636126	0.229822	0.180873	CXCL1/CXCL8/ATP6V0B/FOS	4	T6
hsa01522	Endocrine resistance	4/130	98/8034	0.074101	0.251708	0.198098	MMP9/IGF1R/MAPK14/FOS	4	T6
hsa04640	Hematopoietic cell lineage	4/130	99/8034	0.0762982	0.255122	0.200785	CD24/CSF3R/ITGAM/CD55	4	T6
hsa04620	Toll-like receptor signaling pathway	4/130	104/8034	0.0877696	0.284586	0.223974	CXCL8/MAP2K3/MAPK14/FOS	4	T6
hsa04659	Th17 cell differentiation	4/130	107/8034	0.095032	0.294737	0.231962	HIF1A/MAPK14/IFNGR2/FOS	4	T6
hsa04066	HIF-1 signaling pathway	4/130	109/8034	0.100027	0.303386	0.238769	CYBB/HIF1A/IGF1R/IFNGR2	4	T6
hsa05145	Toxoplasmosis	4/130	112/8034	0.107744	0.307431	0.241953	ALOX5/MAP2K3/MAPK14/IFNGR2	4	T6
hsa04726	Serotonergic synapse	4/130	115/8034	0.115724	0.30956	0.243628	PTGS2/ALOX5/GNAQ/GNB2	4	T6
hsa01200	Carbon metabolism	4/130	117/8034	0.121184	0.320165	0.251974	PGD/TKT/TALDO1/CAT	4	T6
hsa04152	AMPK signaling pathway	4/130	120/8034	0.129579	0.338169	0.266144	IGF1R/FOXO3/CAMKK2/IRS2	4	T6
hsa04926	Relaxin signaling pathway	4/130	129/8034	0.156144	0.397795	0.31307	MMP9/MAPK14/FOS/GNB2	4	T6
hsa04728	Dopaminergic synapse	4/130	132/8034	0.165424	0.416479	0.327775	MAPK14/FOS/GNAQ/GNB2	4	T6
hsa04915	Estrogen signaling pathway	4/130	138/8034	0.184557	0.453516	0.356924	MMP9/FOS/GNAQ/CTSD	4	T6
hsa04723	Retrograde endocannabinoid signaling	4/130	148/8034	0.217931	0.495263	0.389779	PTGS2/MAPK14/GNAQ/GNB2	4	T6
hsa04218	Cellular senescence	4/130	156/8034	0.245728	0.524085	0.412462	CXCL8/MAP2K3/MAPK14/FOXO3	4	T6
hsa04360	Axon guidance	4/130	181/8034	0.33645	0.62609	0.492742	NTNG2/PAK1/LIMK2/PLXNC1	4	T6
hsa05166	Human T-cell leukemia virus 1 infection	4/130	219/8034	0.47529	0.747382	0.5882	SPI1/TSPO/ETS2/FOS	4	T6
hsa04014	Ras signaling pathway	4/130	232/8034	0.520592	0.748658	0.589204	ETS2/PAK1/IGF1R/GNB2	4	T6
hsa04060	Cytokine-cytokine receptor interaction	4/130	294/8034	0.706478	0.827331	0.651121	CSF3R/CXCL1/CXCL8/IFNGR2	4	T6
hsa00030	Pentose phosphate pathway	3/130	30/8034	0.0122195	0.0817176	0.0643129	PGD/TKT/TALDO1	3	T6
hsa00760	Nicotinate and nicotinamide metabolism	3/130	35/8034	0.0185816	0.108744	0.085583	BST1/NAMPT/NADK	3	T6
hsa05143	African trypanosomiasis	3/130	37/8034	0.0215518	0.118258	0.093071	HBB/GNAQ/HBA2	3	T6
hsa05144	Malaria	3/130	50/8034	0.0467725	0.192487	0.15149	CXCL8/HBB/HBA2	3	T6
hsa04913	Ovarian steroidogenesis	3/130	51/8034	0.0491274	0.19469	0.153224	PTGS2/ALOX5/IGF1R	3	T6
hsa04923	Regulation of lipolysis in adipocytes	3/130	56/8034	0.0617472	0.229822	0.180873	PTGS2/ABHD5/IRS2	3	T6
hsa05014	Amyotrophic lateral sclerosis (ALS)	3/130	57/8034	0.064436	0.229822	0.180873	MAP2K3/MAPK14/CAT	3	T6
hsa05134	Legionellosis	3/130	57/8034	0.064436	0.229822	0.180873	ITGAM/CXCL1/CXCL8	3	T6
hsa04730	Long-term depression	3/130	60/8034	0.07282	0.251347	0.197813	LYN/IGF1R/GNAQ	3	T6
hsa04920	Adipocytokine signaling pathway	3/130	69/8034	0.100656	0.303386	0.238769	ACSL1/CAMKK2/IRS2	3	T6
hsa04917	Prolactin signaling pathway	3/130	70/8034	0.10398	0.307431	0.241953	MAPK14/FOS/FOXO3	3	T6
hsa05100	Bacterial invasion of epithelial cells	3/130	73/8034	0.114209	0.30956	0.243628	ARPC5/ACTB/VCL	3	T6
hsa04658	Th1 and Th2 cell differentiation	3/130	92/8034	0.186493	0.453516	0.356924	MAPK14/IFNGR2/FOS	3	T6
hsa04912	GnRH signaling pathway	3/130	93/8034	0.190589	0.458269	0.360665	MAP2K3/MAPK14/GNAQ	3	T6
hsa04713	Circadian entrainment	3/130	97/8034	0.207195	0.48725	0.383473	FOS/GNAQ/GNB2	3	T6
hsa00564	Glycerophospholipid metabolism	3/130	98/8034	0.211398	0.49173	0.386999	LPCAT2/MBOAT2/MBOAT7	3	T6
hsa04750	Inflammatory mediator regulation of TRP channels	3/130	100/8034	0.21986	0.495263	0.389779	MAP2K3/MAPK14/GNAQ	3	T6
hsa04933	AGE-RAGE signaling pathway in diabetic complications	3/130	100/8034	0.21986	0.495263	0.389779	CYBB/CXCL8/MAPK14	3	T6
hsa04660	T cell receptor signaling pathway	3/130	104/8034	0.236984	0.522832	0.411476	PAK1/MAPK14/FOS	3	T6
hsa04725	Cholinergic synapse	3/130	113/8034	0.276267	0.566653	0.445964	FOS/GNAQ/GNB2	3	T6
hsa04724	Glutamatergic synapse	3/130	114/8034	0.280679	0.566653	0.445964	GLUL/GNAQ/GNB2	3	T6
hsa04722	Neurotrophin signaling pathway	3/130	119/8034	0.302825	0.589132	0.463656	IRAK3/MAPK14/FOXO3	3	T6
hsa04114	Oocyte meiosis	3/130	128/8034	0.342854	0.6271	0.493537	IGF1R/MAPK14/YWHAZ	3	T6
hsa05322	Systemic lupus erythematosus	3/130	136/8034	0.378317	0.652902	0.513843	FCGR3B/ACTN1/H3F3A	3	T6
hsa04072	Phospholipase D signaling pathway	3/130	148/8034	0.430705	0.714502	0.562323	FCER1G/CXCL8/SYK	3	T6
hsa04261	Adrenergic signaling in cardiomyocytes	3/130	149/8034	0.435006	0.716087	0.563571	MAPK14/TPM3/GNAQ	3	T6
hsa04022	cGMP-PKG signaling pathway	3/130	167/8034	0.510113	0.748658	0.589204	VASP/GNAQ/IRS2	3	T6
hsa04141	Protein processing in endoplasmic reticulum	3/130	167/8034	0.510113	0.748658	0.589204	CKAP4/UBE2D1/EDEM3	3	T6
hsa05164	Influenza A	3/130	170/8034	0.522135	0.748658	0.589204	CXCL8/ACTB/IFNGR2	3	T6
hsa05034	Alcoholism	3/130	187/8034	0.587109	0.790197	0.621896	H3F3A/GNB2/CAMKK2	3	T6
hsa04144	Endocytosis	3/130	248/8034	0.770737	0.837693	0.659276	RAB31/ARPC5/IGF1R	3	T6
hsa05012	Parkinson disease	3/130	249/8034	0.773101	0.837693	0.659276	LRRK2/ATP5F1E/TXN	3	T6
hsa05016	Huntington disease	3/130	306/8034	0.878162	0.916381	0.721205	SOD2/ATP5F1E/GNAQ	3	T6
hsa05168	Herpes simplex virus 1 infection	3/130	491/8034	0.988104	0.988104	0.777652	SYK/CFP/IFNGR2	3	T6
hsa00220	Arginine biosynthesis	2/130	21/8034	0.0446497	0.192487	0.15149	ARG1/GLUL	2	T6
hsa00630	Glyoxylate and dicarboxylate metabolism	2/130	30/8034	0.0842525	0.277385	0.218306	GLUL/CAT	2	T6
hsa05310	Asthma	2/130	31/8034	0.0891408	0.284718	0.224077	FCER1G/RNASE3	2	T6
hsa00500	Starch and sucrose metabolism	2/130	36/8034	0.114739	0.30956	0.243628	PYGL/GYG1	2	T6
hsa05219	Bladder cancer	2/130	41/8034	0.141934	0.36595	0.288008	MMP9/CXCL8	2	T6
hsa00600	Sphingolipid metabolism	2/130	47/8034	0.176114	0.438237	0.344899	ASAH1/UGCG	2	T6
hsa05110	Vibrio cholerae infection	2/130	50/8034	0.193659	0.460479	0.362404	ACTB/ATP6V0B	2	T6
hsa00240	Pyrimidine metabolism	2/130	57/8034	0.23533	0.522832	0.411476	CDA/ENTPD1	2	T6
hsa04370	VEGF signaling pathway	2/130	59/8034	0.247349	0.524085	0.412462	PTGS2/MAPK14	2	T6
hsa04978	Mineral absorption	2/130	59/8034	0.247349	0.524085	0.412462	SLC40A1/FTL	2	T6
hsa05416	Viral myocarditis	2/130	60/8034	0.253367	0.529166	0.416462	ACTB/CD55	2	T6
hsa04137	Mitophagy - animal	2/130	68/8034	0.301513	0.589132	0.463656	HIF1A/FOXO3	2	T6
hsa05211	Renal cell carcinoma	2/130	69/8034	0.307509	0.592855	0.466585	HIF1A/PAK1	2	T6
hsa04622	RIG-I-like receptor signaling pathway	2/130	70/8034	0.313495	0.593698	0.467249	CXCL8/MAPK14	2	T6
hsa05230	Central carbon metabolism in cancer	2/130	70/8034	0.313495	0.593698	0.467249	HIF1A/SLC16A3	2	T6
hsa04971	Gastric acid secretion	2/130	76/8034	0.349143	0.633191	0.498331	ACTB/GNAQ	2	T6
hsa03320	PPAR signaling pathway	2/130	77/8034	0.355029	0.638456	0.502474	OLR1/ACSL1	2	T6
hsa04721	Synaptic vesicle cycle	2/130	78/8034	0.360897	0.643307	0.506292	ATP6V0B/STX3	2	T6
hsa00983	Drug metabolism - other enzymes	2/130	79/8034	0.366745	0.643307	0.506292	CDA/MPO	2	T6
hsa01521	EGFR tyrosine kinase inhibitor resistance	2/130	79/8034	0.366745	0.643307	0.506292	IGF1R/FOXO3	2	T6
hsa04727	GABAergic synapse	2/130	89/8034	0.423976	0.714417	0.562256	GLUL/GNB2	2	T6
hsa05410	Hypertrophic cardiomyopathy (HCM)	2/130	90/8034	0.429558	0.714502	0.562323	ACTB/TPM3	2	T6
hsa05414	Dilated cardiomyopathy (DCM)	2/130	96/8034	0.462438	0.744074	0.585597	ACTB/TPM3	2	T6
hsa05215	Prostate cancer	2/130	97/8034	0.467812	0.747103	0.58798	MMP9/IGF1R	2	T6
hsa05231	Choline metabolism in cancer	2/130	98/8034	0.473154	0.747382	0.5882	HIF1A/FOS	2	T6
hsa04914	Progesterone-mediated oocyte maturation	2/130	99/8034	0.478464	0.747382	0.5882	IGF1R/MAPK14	2	T6
hsa04061	Viral protein interaction with cytokine and cytokine receptor	2/130	100/8034	0.483741	0.748658	0.589204	CXCL1/CXCL8	2	T6
hsa04972	Pancreatic secretion	2/130	102/8034	0.494198	0.748658	0.589204	BST1/GNAQ	2	T6
hsa04922	Glucagon signaling pathway	2/130	106/8034	0.51471	0.748658	0.589204	PYGL/GNAQ	2	T6
hsa04928	Parathyroid hormone synthesis, secretion and action	2/130	106/8034	0.51471	0.748658	0.589204	FOS/GNAQ	2	T6
hsa04931	Insulin resistance	2/130	108/8034	0.52476	0.748658	0.589204	PYGL/IRS2	2	T6
hsa04919	Thyroid hormone signaling pathway	2/130	121/8034	0.586638	0.790197	0.621896	ACTB/HIF1A	2	T6
hsa00190	Oxidative phosphorylation	2/130	133/8034	0.638341	0.819903	0.645275	ATP5F1E/ATP6V0B	2	T6
hsa04270	Vascular smooth muscle contraction	2/130	135/8034	0.646452	0.819903	0.645275	MYL6/GNAQ	2	T6
hsa04371	Apelin signaling pathway	2/130	137/8034	0.65442	0.819903	0.645275	GNAQ/GNB2	2	T6
hsa04910	Insulin signaling pathway	2/130	137/8034	0.65442	0.819903	0.645275	PYGL/IRS2	2	T6
hsa04550	Signaling pathways regulating pluripotency of stem cells	2/130	143/8034	0.677475	0.823748	0.648301	IGF1R/MAPK14	2	T6
hsa05224	Breast cancer	2/130	147/8034	0.692145	0.827331	0.651121	IGF1R/FOS	2	T6
hsa04514	Cell adhesion molecules (CAMs)	2/130	148/8034	0.695726	0.827331	0.651121	ITGAM/NTNG2	2	T6
hsa04932	Non-alcoholic fatty liver disease (NAFLD)	2/130	149/8034	0.699273	0.827331	0.651121	CXCL8/IRS2	2	T6
hsa04150	mTOR signaling pathway	2/130	155/8034	0.719848	0.830212	0.653389	IGF1R/LAMTOR4	2	T6
hsa04390	Hippo signaling pathway	2/130	157/8034	0.726441	0.831328	0.654267	ACTB/YWHAZ	2	T6
hsa04630	JAK-STAT signaling pathway	2/130	162/8034	0.742355	0.837693	0.659276	CSF3R/IFNGR2	2	T6
hsa05225	Hepatocellular carcinoma	2/130	168/8034	0.76041	0.837693	0.659276	ACTB/IGF1R	2	T6
hsa04024	cAMP signaling pathway	2/130	216/8034	0.8693	0.912434	0.718098	PAK1/FOS	2	T6
hsa05165	Human papillomavirus infection	2/130	330/8034	0.972708	0.977274	0.769129	PTGS2/ATP6V0B	2	T6
hsa00910	Nitrogen metabolism	1/130	17/8034	0.242407	0.524085	0.412462	GLUL	1	T6
hsa00061	Fatty acid biosynthesis	1/130	18/8034	0.254692	0.529166	0.416462	ACSL1	1	T6
hsa00100	Steroid biosynthesis	1/130	20/8034	0.278672	0.566653	0.445964	LBR	1	T6
hsa00770	Pantothenate and CoA biosynthesis	1/130	21/8034	0.290373	0.580746	0.457055	VNN2	1	T6
hsa04392	Hippo signaling pathway - multiple species	1/130	29/8034	0.377447	0.652902	0.513843	PAK1	1	T6
hsa00512	Mucin type O-glycan biosynthesis	1/130	32/8034	0.407291	0.697283	0.548772	B4GALT5	1	T6
hsa04130	SNARE interactions in vesicular transport	1/130	33/8034	0.416921	0.708103	0.557287	STX3	1	T6
hsa00250	Alanine, aspartate and glutamate metabolism	1/130	36/8034	0.444886	0.726761	0.571971	GLUL	1	T6
hsa05216	Thyroid cancer	1/130	37/8034	0.453909	0.735883	0.57915	TPM3	1	T6
hsa00380	Tryptophan metabolism	1/130	42/8034	0.496886	0.748658	0.589204	CAT	1	T6
hsa00071	Fatty acid degradation	1/130	44/8034	0.513122	0.748658	0.589204	ACSL1	1	T6
hsa02010	ABC transporters	1/130	45/8034	0.521043	0.748658	0.589204	ABCA13	1	T6
hsa04930	Type II diabetes mellitus	1/130	46/8034	0.528837	0.749478	0.58985	IRS2	1	T6
hsa00565	Ether lipid metabolism	1/130	49/8034	0.551471	0.771468	0.607156	LPCAT2	1	T6
hsa00330	Arginine and proline metabolism	1/130	50/8034	0.558774	0.771468	0.607156	ARG1	1	T6
hsa04979	Cholesterol metabolism	1/130	50/8034	0.558774	0.771468	0.607156	TSPO	1	T6
hsa04961	Endocrine and other factor-regulated calcium reabsorption	1/130	53/8034	0.57998	0.790197	0.621896	GNAQ	1	T6
hsa00480	Glutathione metabolism	1/130	57/8034	0.60669	0.806408	0.634654	PGD	1	T6
hsa01212	Fatty acid metabolism	1/130	57/8034	0.60669	0.806408	0.634654	ACSL1	1	T6
hsa05213	Endometrial cancer	1/130	58/8034	0.6131	0.809897	0.6374	FOXO3	1	T6
hsa00561	Glycerolipid metabolism	1/130	61/8034	0.631713	0.819903	0.645275	MBOAT2	1	T6
hsa04929	GnRH secretion	1/130	64/8034	0.649438	0.819903	0.645275	GNAQ	1	T6
hsa04927	Cortisol synthesis and secretion	1/130	65/8034	0.655156	0.819903	0.645275	GNAQ	1	T6
hsa05321	Inflammatory bowel disease (IBD)	1/130	65/8034	0.655156	0.819903	0.645275	IFNGR2	1	T6
hsa04720	Long-term potentiation	1/130	67/8034	0.666316	0.823748	0.648301	GNAQ	1	T6
hsa05223	Non-small cell lung cancer	1/130	68/8034	0.671761	0.823748	0.648301	FOXO3	1	T6
hsa04924	Renin secretion	1/130	69/8034	0.677118	0.823748	0.648301	GNAQ	1	T6
hsa05031	Amphetamine addiction	1/130	69/8034	0.677118	0.823748	0.648301	FOS	1	T6
hsa05218	Melanoma	1/130	72/8034	0.692673	0.827331	0.651121	IGF1R	1	T6
hsa04918	Thyroid hormone synthesis	1/130	75/8034	0.707484	0.827331	0.651121	GNAQ	1	T6
hsa05214	Glioma	1/130	75/8034	0.707484	0.827331	0.651121	IGF1R	1	T6
hsa05412	Arrhythmogenic right ventricular cardiomyopathy (ARVC)	1/130	77/8034	0.716962	0.830212	0.653389	ACTB	1	T6
hsa04612	Antigen processing and presentation	1/130	78/8034	0.721586	0.830212	0.653389	CTSS	1	T6
hsa05204	Chemical carcinogenesis	1/130	82/8034	0.739345	0.837693	0.659276	PTGS2	1	T6
hsa04012	ErbB signaling pathway	1/130	85/8034	0.751923	0.837693	0.659276	PAK1	1	T6
hsa04911	Insulin secretion	1/130	86/8034	0.75598	0.837693	0.659276	GNAQ	1	T6
hsa05210	Colorectal cancer	1/130	86/8034	0.75598	0.837693	0.659276	FOS	1	T6
hsa04260	Cardiac muscle contraction	1/130	87/8034	0.759971	0.837693	0.659276	TPM3	1	T6
hsa04540	Gap junction	1/130	88/8034	0.763898	0.837693	0.659276	GNAQ	1	T6
hsa05032	Morphine addiction	1/130	91/8034	0.775299	0.837693	0.659276	GNB2	1	T6
hsa05222	Small cell lung cancer	1/130	92/8034	0.778976	0.837693	0.659276	PTGS2	1	T6
hsa04070	Phosphatidylinositol signaling system	1/130	97/8034	0.796487	0.85155	0.670182	PIP4P2	1	T6
hsa04925	Aldosterone synthesis and secretion	1/130	98/8034	0.799821	0.85155	0.670182	GNAQ	1	T6
hsa04916	Melanogenesis	1/130	101/8034	0.809499	0.857588	0.674934	GNAQ	1	T6
hsa04110	Cell cycle	1/130	124/8034	0.869797	0.912434	0.718098	YWHAZ	1	T6
hsa00230	Purine metabolism	1/130	130/8034	0.882124	0.916381	0.721205	ENTPD1	1	T6
hsa05017	Spinocerebellar ataxia	1/130	133/8034	0.887845	0.917869	0.722376	GNAQ	1	T6
hsa05162	Measles	1/130	138/8034	0.896776	0.921682	0.725377	FOS	1	T6
hsa04120	Ubiquitin mediated proteolysis	1/130	140/8034	0.900147	0.921682	0.725377	UBE2D1	1	T6
hsa04934	Cushing syndrome	1/130	155/8034	0.92218	0.935292	0.736088	GNAQ	1	T6
hsa05160	Hepatitis C	1/130	155/8034	0.92218	0.935292	0.736088	YWHAZ	1	T6
hsa04020	Calcium signaling pathway	1/130	196/8034	0.960728	0.969791	0.763239	GNAQ	1	T6
hsa04141	Protein processing in endoplasmic reticulum	2020-07-11	167/8034	4.55e-10	1.14e-08	6.23e-09	HSPA1B/HSPA6/HSPA1A/HSPH1/HSP90AA1/DNAJB1/HSPA8	7	T7
hsa05134	Legionellosis	2020-05-11	57/8034	6.72e-09	8.4e-08	4.6e-08	HSPA1B/HSPA6/HSPA1A/HSPA8/HSPD1	5	T7
hsa04612	Antigen processing and presentation	2020-05-11	78/8034	3.35e-08	2.79e-07	1.53e-07	HSPA1B/HSPA6/HSPA1A/HSP90AA1/HSPA8	5	T7
hsa04915	Estrogen signaling pathway	2020-05-11	138/8034	5.91e-07	3.7e-06	2.02e-06	HSPA1B/HSPA6/HSPA1A/HSP90AA1/HSPA8	5	T7
hsa04213	Longevity regulating pathway - multiple species	2020-04-11	62/8034	1.02e-06	5.1e-06	2.79e-06	HSPA1B/HSPA6/HSPA1A/HSPA8	4	T7
hsa05145	Toxoplasmosis	2020-04-11	112/8034	1.1e-05	4.56e-05	2.5e-05	HSPA1B/HSPA6/HSPA1A/HSPA8	4	T7
hsa05162	Measles	2020-04-11	138/8034	2.5e-05	8.95e-05	4.9e-05	HSPA1B/HSPA6/HSPA1A/HSPA8	4	T7
hsa03040	Spliceosome	2020-04-11	149/8034	3.39e-05	0.000105904	5.8e-05	HSPA1B/HSPA6/HSPA1A/HSPA8	4	T7
hsa04144	Endocytosis	2020-04-11	248/8034	0.000246469	0.000684636	0.000374748	HSPA1B/HSPA6/HSPA1A/HSPA8	4	T7
hsa04010	MAPK signaling pathway	2020-04-11	294/8034	0.00047292	0.0011823	0.000647154	HSPA1B/HSPA6/HSPA1A/HSPA8	4	T7
hsa05020	Prion diseases	2020-02-11	35/8034	0.000989442	0.00224873	0.00123088	HSPA1A/STIP1	2	T7
hsa04621	NOD-like receptor signaling pathway	2020-02-11	181/8034	0.0242897	0.0506036	0.0276988	TXNIP/HSP90AA1	2	T7
hsa04940	Type I diabetes mellitus	2020-01-11	43/8034	0.057359	0.110306	0.0603779	HSPD1	1	T7
hsa03018	RNA degradation	2020-01-11	79/8034	0.103062	0.184039	0.100737	HSPD1	1	T7
hsa04657	IL-17 signaling pathway	2020-01-11	94/8034	0.121503	0.187608	0.10269	HSP90AA1	1	T7
hsa05215	Prostate cancer	2020-01-11	97/8034	0.12515	0.187608	0.10269	HSP90AA1	1	T7
hsa04914	Progesterone-mediated oocyte maturation	2020-01-11	99/8034	0.127573	0.187608	0.10269	HSP90AA1	1	T7
hsa04659	Th17 cell differentiation	2020-01-11	107/8034	0.137206	0.190564	0.104309	HSP90AA1	1	T7
hsa05418	Fluid shear stress and atherosclerosis	2020-01-11	139/8034	0.174778	0.229971	0.125879	HSP90AA1	1	T7
hsa03010	Ribosome	2020-01-11	158/8034	0.196376	0.235117	0.128696	RPS19	1	T7
hsa04217	Necroptosis	2020-01-11	159/8034	0.197498	0.235117	0.128696	HSP90AA1	1	T7
hsa05164	Influenza A	2020-01-11	170/8034	0.209751	0.238353	0.130467	DNAJB1	1	T7
hsa05152	Tuberculosis	2020-01-11	180/8034	0.220741	0.239936	0.131334	HSPD1	1	T7
hsa05132	Salmonella infection	2020-01-11	206/8034	0.24867	0.259032	0.141786	HSP90AA1	1	T7
hsa04151	PI3K-Akt signaling pathway	2020-01-11	354/8034	0.391044	0.391044	0.214045	HSP90AA1	1	T7
