# Supplementary material for: Single-cell RNA sequencing of human femoral head in vivo
Source: Aging (Albany NY). 2021 Jun 10;13(11):15595–619. doi: 10.18632/aging.203124 (PMC8221309; doi:10.18632/aging.203124)
Supplement: Supplementary Table 12 [file aging-13-203124-s013.xlsx]

## Sheet: Sheet1
Supplementary Table 12. GO enrichment analyses of each B cells subtype.
ID	Description	GeneRatio	BgRatio	pvalue	p.adjust	qvalue	geneID	Count	Subtype
GO:0034976	response to endoplasmic reticulum stress	26/135	254/17913	2.85e-22	7.17e-19	5.48e-19	ERN1/LMNA/DNAJB9/SEL1L/DERL3/HM13/SDF2L1/SELENOS/ERLEC1/JUN/ATF3/MYDGF/HSP90B1/XBP1/DNAJC3/MANF/BCL2/P4HB/HSPA5/PPP1R15A/HERPUD1/SEC61B/PDIA6/SELENOK/TMBIM6/HSPA1A	26	B1
GO:0035966	response to topologically incorrect protein	19/135	175/17913	5.83e-17	7.34e-14	5.61e-14	ERN1/LMNA/DNAJB9/DERL3/SDF2L1/SELENOS/ATF3/MYDGF/HSP90B1/XBP1/DNAJC3/MANF/HSPA5/PPP1R15A/HERPUD1/PDIA6/HSPB1/TMBIM6/HSPA1A	19	B1
GO:0006979	response to oxidative stress	19/135	442/17913	9.06e-10	1.27e-07	9.68e-08	SDC1/PDK1/SELENOS/JUN/FBXW7/BCL2/MCL1/PSAP/CFLAR/P4HB/GSTP1/RHOB/TP53INP1/TNFAIP3/SELENOK/HSPB1/HSPA1B/CYBA/HSPA1A	19	B1
GO:0050727	regulation of inflammatory response	19/135	479/17913	3.41e-09	3.3e-07	2.52e-07	LDLR/RORA/SELENOS/IGLV3-1/GSTP1/NEAT1/IGHG2/IGHG1/TNFAIP3/IGLV6-57/NFKBIA/IGHG4/IGHG3/IGKV4-1/CCL5/IGKV3-20/IGKC/IGLC7/IGLC2	19	B1
GO:0006986	response to unfolded protein	18/135	161/17913	2.39e-16	1.51e-13	1.15e-13	ERN1/LMNA/DNAJB9/DERL3/SELENOS/ATF3/MYDGF/HSP90B1/XBP1/DNAJC3/MANF/HSPA5/PPP1R15A/HERPUD1/PDIA6/HSPB1/TMBIM6/HSPA1A	18	B1
GO:2001233	regulation of apoptotic signaling pathway	18/135	397/17913	1.12e-09	1.43e-07	1.09e-07	LMNA/SELENOS/ITGA6/ATF3/XBP1/FBXW7/BCL2/MCL1/CFLAR/ITM2C/P4HB/GSTP1/HERPUD1/TNFAIP3/HSPB1/HSPA1B/TMBIM6/HSPA1A	18	B1
GO:0035967	cellular response to topologically incorrect protein	17/135	135/17913	2.22e-16	1.51e-13	1.15e-13	ERN1/LMNA/DNAJB9/DERL3/SDF2L1/SELENOS/ATF3/MYDGF/HSP90B1/XBP1/DNAJC3/HSPA5/PPP1R15A/HERPUD1/PDIA6/TMBIM6/HSPA1A	17	B1
GO:0034599	cellular response to oxidative stress	17/135	296/17913	9.03e-11	1.75e-08	1.34e-08	PDK1/SELENOS/JUN/FBXW7/BCL2/MCL1/PSAP/CFLAR/P4HB/GSTP1/RHOB/TP53INP1/TNFAIP3/HSPB1/HSPA1B/CYBA/HSPA1A	17	B1
GO:0034620	cellular response to unfolded protein	16/135	123/17913	1.04e-15	5.26e-13	4.02e-13	ERN1/LMNA/DNAJB9/DERL3/SELENOS/ATF3/MYDGF/HSP90B1/XBP1/DNAJC3/HSPA5/PPP1R15A/HERPUD1/PDIA6/TMBIM6/HSPA1A	16	B1
GO:0006959	humoral immune response	16/135	276/17913	2.92e-10	4.6e-08	3.51e-08	IGLV3-1/BCL2/RGCC/IGHG2/IGHG1/IGLV6-57/IGHA2/IGHG4/IGHG3/IGKV4-1/JCHAIN/IGKV3-20/IGKC/IGHA1/IGLC7/IGLC2	16	B1
GO:0010498	proteasomal protein catabolic process	16/135	382/17913	3.07e-08	1.75e-06	1.34e-06	TRIB1/DNAJB9/SEL1L/DERL3/HM13/SDF2L1/SELENOS/ERLEC1/PELI1/HSP90B1/FBXW7/HSPA5/HERPUD1/SEC61B/UBC/HSPA1A	16	B1
GO:0002697	regulation of immune effector process	16/135	441/17913	2.19e-07	1.13e-05	8.6e-06	XBP1/IGLV3-1/MZB1/IGHG2/IGHG1/TNFAIP3/IGLV6-57/SELENOK/IGHG4/IGHG3/IGKV4-1/TMBIM6/IGKV3-20/IGKC/IGLC7/IGLC2	16	B1
GO:0002460	adaptive immune response based on somatic recombination of immune receptors built from immunoglobulin superfamily domains	15/135	295/17913	6.51e-09	5.65e-07	4.32e-07	CD27/RORA/KDELR1/IGLV3-1/IGHG2/IGHG1/TNFAIP3/IGLV6-57/IGHG4/IGHG3/IGKV4-1/IGKV3-20/IGKC/IGLC7/IGLC2	15	B1
GO:0006909	phagocytosis	15/135	308/17913	1.16e-08	7.66e-07	5.85e-07	GAS6/LDLR/IGLV3-1/LMAN2/IGHG2/IGHG1/IGLV6-57/IGHG4/IGHG3/IGKV4-1/CYBA/IGKV3-20/IGKC/IGLC7/IGLC2	15	B1
GO:0050900	leukocyte migration	15/135	467/17913	2.45e-06	8.81e-05	6.73e-05	SDC1/GAS6/ITGA6/IGLV3-1/IGLV6-57/SELENOK/IGHA2/IGKV4-1/JCHAIN/CCL5/IGKV3-20/IGKC/IGHA1/IGLC7/IGLC2	15	B1
GO:0009991	response to extracellular stimulus	15/135	498/17913	5.35e-06	0.000170509	0.00013028	AQP3/GAS6/LDLR/JUN/ITGA6/ATF3/HSP90B1/XBP1/BCL2/HSPA5/NUCB2/GSTP1/DAD1/CYBA/TMBIM6	15	B1
GO:0030968	endoplasmic reticulum unfolded protein response	14/135	112/17913	1.23e-13	3.88e-11	2.96e-11	ERN1/LMNA/DNAJB9/DERL3/SELENOS/ATF3/MYDGF/HSP90B1/XBP1/DNAJC3/HSPA5/PPP1R15A/HERPUD1/PDIA6	14	B1
GO:2001234	negative regulation of apoptotic signaling pathway	14/135	223/17913	1.44e-09	1.58e-07	1.2e-07	LMNA/SELENOS/ITGA6/XBP1/BCL2/MCL1/CFLAR/GSTP1/HERPUD1/TNFAIP3/HSPB1/HSPA1B/TMBIM6/HSPA1A	14	B1
GO:0097193	intrinsic apoptotic signaling pathway	14/135	277/17913	2.31e-08	1.35e-06	1.03e-06	PDK1/PERP/SELENOS/XBP1/FBXW7/BCL2/MCL1/P4HB/PPP1R15A/HERPUD1/SELENOK/HSPB1/TMBIM6/HSPA1A	14	B1
GO:0002449	lymphocyte mediated immunity	14/135	293/17913	4.67e-08	2.61e-06	1.99e-06	SLAMF7/CD27/KDELR1/IGLV3-1/IGHG2/IGHG1/IGLV6-57/IGHG4/IGHG3/IGKV4-1/IGKV3-20/IGKC/IGLC7/IGLC2	14	B1
GO:0051604	protein maturation	14/135	353/17913	4.56e-07	2.03e-05	1.55e-05	PERP/PRDX4/IGLV3-1/TMEM59/IGHG2/IGHG1/IGLV6-57/IGHG4/IGHG3/IGKV4-1/IGKV3-20/IGKC/IGLC7/IGLC2	14	B1
GO:0002768	immune response-regulating cell surface receptor signaling pathway	14/135	434/17913	5.16e-06	0.0001686	0.000128822	JUN/PHPT1/IGLV3-1/BCL2/IGHG2/IGHG1/IGLV6-57/IGHG4/IGHG3/IGKV4-1/IGKV3-20/IGKC/IGLC7/IGLC2	14	B1
GO:0031667	response to nutrient levels	14/135	466/17913	1.16e-05	0.00032313	0.000246893	AQP3/GAS6/LDLR/JUN/ATF3/HSP90B1/XBP1/BCL2/HSPA5/NUCB2/GSTP1/DAD1/CYBA/TMBIM6	14	B1
GO:1905897	regulation of response to endoplasmic reticulum stress	13/135	83/17913	4.75e-14	1.71e-11	1.3e-11	ERN1/DNAJB9/DERL3/SELENOS/ERLEC1/XBP1/DNAJC3/MANF/HSPA5/PPP1R15A/HERPUD1/TMBIM6/HSPA1A	13	B1
GO:0002673	regulation of acute inflammatory response	13/135	160/17913	2.41e-10	4.04e-08	3.09e-08	SELENOS/IGLV3-1/GSTP1/IGHG2/IGHG1/IGLV6-57/IGHG4/IGHG3/IGKV4-1/IGKV3-20/IGKC/IGLC7/IGLC2	13	B1
GO:0002526	acute inflammatory response	13/135	220/17913	1.19e-08	7.66e-07	5.85e-07	SELENOS/IGLV3-1/GSTP1/IGHG2/IGHG1/IGLV6-57/IGHG4/IGHG3/IGKV4-1/IGKV3-20/IGKC/IGLC7/IGLC2	13	B1
GO:0016485	protein processing	13/135	295/17913	3.66e-07	1.74e-05	1.33e-05	PERP/IGLV3-1/TMEM59/IGHG2/IGHG1/IGLV6-57/IGHG4/IGHG3/IGKV4-1/IGKV3-20/IGKC/IGLC7/IGLC2	13	B1
GO:0006898	receptor-mediated endocytosis	13/135	301/17913	4.6e-07	2.03e-05	1.55e-05	LDLR/HSP90B1/IGLV3-1/CD63/IGLV6-57/IGHA2/IGKV4-1/JCHAIN/IGKV3-20/IGKC/IGHA1/IGLC7/IGLC2	13	B1
GO:0043161	proteasome-mediated ubiquitin-dependent protein catabolic process	13/135	328/17913	1.21e-06	4.68e-05	3.58e-05	TRIB1/DNAJB9/SEL1L/DERL3/SELENOS/PELI1/HSP90B1/FBXW7/HSPA5/HERPUD1/SEC61B/UBC/HSPA1A	13	B1
GO:0001666	response to hypoxia	13/135	354/17913	2.81e-06	9.97e-05	7.62e-05	AQP3/LMNA/PDK1/RORA/HSP90B1/BCL2/CITED2/RGCC/CFLAR/P4HB/UBC/CYBA/TMBIM6	13	B1
GO:0036293	response to decreased oxygen levels	13/135	365/17913	3.93e-06	0.000131884	0.000100769	AQP3/LMNA/PDK1/RORA/HSP90B1/BCL2/CITED2/RGCC/CFLAR/P4HB/UBC/CYBA/TMBIM6	13	B1
GO:0070482	response to oxygen levels	13/135	389/17913	7.82e-06	0.000231788	0.000177101	AQP3/LMNA/PDK1/RORA/HSP90B1/BCL2/CITED2/RGCC/CFLAR/P4HB/UBC/CYBA/TMBIM6	13	B1
GO:0002429	immune response-activating cell surface receptor signaling pathway	13/135	399/17913	1.03e-05	0.000293419	0.000224192	PHPT1/IGLV3-1/BCL2/IGHG2/IGHG1/IGLV6-57/IGHG4/IGHG3/IGKV4-1/IGKV3-20/IGKC/IGLC7/IGLC2	13	B1
GO:0002521	leukocyte differentiation	13/135	485/17913	7.76e-05	0.00186108	0.00142199	PRDM1/TRIB1/GAS6/CD27/DNAJB9/RORA/JUN/LGALS1/XBP1/KDELR1/FBXW7/BCL2/KLF6	13	B1
GO:0002694	regulation of leukocyte activation	13/135	492/17913	8.97e-05	0.00210902	0.00161144	PRDM1/GAS6/CD27/LDLR/RORA/PELI1/LGALS1/XBP1/BCL2/MZB1/TNFAIP3/SELENOK/CCL5	13	B1
GO:0006956	complement activation	12/135	128/17913	2.31e-10	4.04e-08	3.09e-08	IGLV3-1/RGCC/IGHG2/IGHG1/IGLV6-57/IGHG4/IGHG3/IGKV4-1/IGKV3-20/IGKC/IGLC7/IGLC2	12	B1
GO:0072376	protein activation cascade	12/135	151/17913	1.57e-09	1.65e-07	1.26e-07	IGLV3-1/RGCC/IGHG2/IGHG1/IGLV6-57/IGHG4/IGHG3/IGKV4-1/IGKV3-20/IGKC/IGLC7/IGLC2	12	B1
GO:0016064	immunoglobulin mediated immune response	12/135	171/17913	6.51e-09	5.65e-07	4.32e-07	CD27/IGLV3-1/IGHG2/IGHG1/IGLV6-57/IGHG4/IGHG3/IGKV4-1/IGKV3-20/IGKC/IGLC7/IGLC2	12	B1
GO:0019724	B cell mediated immunity	12/135	173/17913	7.42e-09	6.02e-07	4.6e-07	CD27/IGLV3-1/IGHG2/IGHG1/IGLV6-57/IGHG4/IGHG3/IGKV4-1/IGKV3-20/IGKC/IGLC7/IGLC2	12	B1
GO:0070613	regulation of protein processing	12/135	173/17913	7.42e-09	6.02e-07	4.6e-07	IGLV3-1/TMEM59/IGHG2/IGHG1/IGLV6-57/IGHG4/IGHG3/IGKV4-1/IGKV3-20/IGKC/IGLC7/IGLC2	12	B1
GO:1903317	regulation of protein maturation	12/135	175/17913	8.45e-09	6.25e-07	4.78e-07	IGLV3-1/TMEM59/IGHG2/IGHG1/IGLV6-57/IGHG4/IGHG3/IGKV4-1/IGKV3-20/IGKC/IGLC7/IGLC2	12	B1
GO:0097191	extrinsic apoptotic signaling pathway	12/135	213/17913	7.52e-08	4.03e-06	3.08e-06	LMNA/CD27/ITGA6/ATF3/BCL2/MCL1/CFLAR/ITM2C/GSTP1/TNFAIP3/HSPA1B/HSPA1A	12	B1
GO:0038093	Fc receptor signaling pathway	12/135	241/17913	2.87e-07	1.45e-05	1.11e-05	JUN/IGLV3-1/IGHG2/IGHG1/IGLV6-57/IGHG4/IGHG3/IGKV4-1/IGKV3-20/IGKC/IGLC7/IGLC2	12	B1
GO:0071356	cellular response to tumor necrosis factor	12/135	266/17913	8.22e-07	3.39e-05	2.59e-05	GAS6/CD27/TNFRSF17/TNFRSF13B/RORA/GSTP1/TNFAIP3/NFKBIA/HSPA1B/CYBA/CCL5/HSPA1A	12	B1
GO:0034612	response to tumor necrosis factor	12/135	284/17913	1.63e-06	6.14e-05	4.69e-05	GAS6/CD27/TNFRSF17/TNFRSF13B/RORA/GSTP1/TNFAIP3/NFKBIA/HSPA1B/CYBA/CCL5/HSPA1A	12	B1
GO:0009636	response to toxic substance	12/135	499/17913	0.000398002	0.00686144	0.0052426	SDC1/CD27/PRDX4/SELENOS/JUN/BCL2/PSAP/GSTP1/RHOB/TP53INP1/TNFAIP3/CCL5	12	B1
GO:1903573	negative regulation of response to endoplasmic reticulum stress	11/135	44/17913	1.83e-14	7.67e-12	5.86e-12	DNAJB9/DERL3/SELENOS/ERLEC1/XBP1/DNAJC3/HSPA5/PPP1R15A/HERPUD1/TMBIM6/HSPA1A	11	B1
GO:0036503	ERAD pathway	11/135	79/17913	1.72e-11	4.82e-09	3.68e-09	DNAJB9/SEL1L/DERL3/HM13/SDF2L1/SELENOS/ERLEC1/HSP90B1/HSPA5/HERPUD1/SEC61B	11	B1
GO:0006958	complement activation, classical pathway	11/135	91/17913	8.36e-11	1.75e-08	1.34e-08	IGLV3-1/IGHG2/IGHG1/IGLV6-57/IGHG4/IGHG3/IGKV4-1/IGKV3-20/IGKC/IGLC7/IGLC2	11	B1
GO:0002455	humoral immune response mediated by circulating immunoglobulin	11/135	104/17913	3.63e-10	5.37e-08	4.1e-08	IGLV3-1/IGHG2/IGHG1/IGLV6-57/IGHG4/IGHG3/IGKV4-1/IGKV3-20/IGKC/IGLC7/IGLC2	11	B1
GO:0030449	regulation of complement activation	11/135	116/17913	1.18e-09	1.43e-07	1.09e-07	IGLV3-1/IGHG2/IGHG1/IGLV6-57/IGHG4/IGHG3/IGKV4-1/IGKV3-20/IGKC/IGLC7/IGLC2	11	B1
GO:2000257	regulation of protein activation cascade	11/135	117/17913	1.3e-09	1.49e-07	1.14e-07	IGLV3-1/IGHG2/IGHG1/IGLV6-57/IGHG4/IGHG3/IGKV4-1/IGKV3-20/IGKC/IGLC7/IGLC2	11	B1
GO:0002920	regulation of humoral immune response	11/135	135/17913	5.97e-09	5.57e-07	4.25e-07	IGLV3-1/IGHG2/IGHG1/IGLV6-57/IGHG4/IGHG3/IGKV4-1/IGKV3-20/IGKC/IGLC7/IGLC2	11	B1
GO:0002433	immune response-regulating cell surface receptor signaling pathway involved in phagocytosis	11/135	139/17913	8.13e-09	6.2e-07	4.74e-07	IGLV3-1/IGHG2/IGHG1/IGLV6-57/IGHG4/IGHG3/IGKV4-1/IGKV3-20/IGKC/IGLC7/IGLC2	11	B1
GO:0038096	Fc-gamma receptor signaling pathway involved in phagocytosis	11/135	139/17913	8.13e-09	6.2e-07	4.74e-07	IGLV3-1/IGHG2/IGHG1/IGLV6-57/IGHG4/IGHG3/IGKV4-1/IGKV3-20/IGKC/IGLC7/IGLC2	11	B1
GO:0038094	Fc-gamma receptor signaling pathway	11/135	141/17913	9.44e-09	6.79e-07	5.19e-07	IGLV3-1/IGHG2/IGHG1/IGLV6-57/IGHG4/IGHG3/IGKV4-1/IGKV3-20/IGKC/IGLC7/IGLC2	11	B1
GO:0002431	Fc receptor mediated stimulatory signaling pathway	11/135	142/17913	1.02e-08	7.11e-07	5.43e-07	IGLV3-1/IGHG2/IGHG1/IGLV6-57/IGHG4/IGHG3/IGKV4-1/IGKV3-20/IGKC/IGLC7/IGLC2	11	B1
GO:2001236	regulation of extrinsic apoptotic signaling pathway	11/135	151/17913	1.93e-08	1.19e-06	9.08e-07	LMNA/ITGA6/ATF3/BCL2/MCL1/CFLAR/ITM2C/GSTP1/TNFAIP3/HSPA1B/HSPA1A	11	B1
GO:0006457	protein folding	11/135	176/17913	9.39e-08	4.93e-06	3.76e-06	PRDX4/PDIA4/LMAN1/HSP90B1/DNAJC1/HSPA5/PPIB/PDIA6/HSPB1/HSPA1B/HSPA1A	11	B1
GO:0071456	cellular response to hypoxia	11/135	210/17913	5.56e-07	2.37e-05	1.81e-05	AQP3/LMNA/PDK1/RORA/BCL2/CITED2/RGCC/CFLAR/P4HB/UBC/TMBIM6	11	B1
GO:0036294	cellular response to decreased oxygen levels	11/135	220/17913	8.82e-07	3.52e-05	2.69e-05	AQP3/LMNA/PDK1/RORA/BCL2/CITED2/RGCC/CFLAR/P4HB/UBC/TMBIM6	11	B1
GO:0071453	cellular response to oxygen levels	11/135	237/17913	1.83e-06	6.76e-05	5.17e-05	AQP3/LMNA/PDK1/RORA/BCL2/CITED2/RGCC/CFLAR/P4HB/UBC/TMBIM6	11	B1
GO:0031668	cellular response to extracellular stimulus	11/135	251/17913	3.18e-06	0.000109797	8.39e-05	AQP3/GAS6/JUN/ITGA6/ATF3/HSP90B1/XBP1/BCL2/HSPA5/GSTP1/CYBA	11	B1
GO:0071496	cellular response to external stimulus	11/135	320/17913	3.11e-05	0.000816691	0.000624007	AQP3/GAS6/JUN/ITGA6/ATF3/HSP90B1/XBP1/BCL2/HSPA5/GSTP1/CYBA	11	B1
GO:0051249	regulation of lymphocyte activation	11/135	401/17913	0.00023061	0.00446497	0.00341154	PRDM1/GAS6/CD27/PELI1/LGALS1/XBP1/BCL2/MZB1/TNFAIP3/SELENOK/CCL5	11	B1
GO:0043900	regulation of multi-organism process	11/135	408/17913	0.000267458	0.00509994	0.0038967	TRIB1/PRDX4/JUN/LGALS1/BCL2/P4HB/PPIB/TNFAIP3/SELENOK/CYBA/CCL5	11	B1
GO:0051090	regulation of DNA-binding transcription factor activity	11/135	429/17913	0.000409208	0.00700665	0.00535355	TRIB1/GAS6/PELI1/JUN/RGCC/CFLAR/UBC/TNFAIP3/NFKBIA/HSPA1B/HSPA1A	11	B1
GO:0001819	positive regulation of cytokine production	11/135	446/17913	0.000566008	0.00874014	0.00667805	ZBP1/RORA/PELI1/XBP1/RGCC/SELENOK/HSPB1/IGHD/HSPA1B/CYBA/HSPA1A	11	B1
GO:0006914	autophagy	11/135	471/17913	0.00088566	0.0121815	0.00930745	ERN1/XBP1/FBXW7/BCL2/MCL1/PSAP/TMEM59/VMP1/TP53INP1/HSPB1/TMBIM6	11	B1
GO:0061919	process utilizing autophagic mechanism	11/135	471/17913	0.00088566	0.0121815	0.00930745	ERN1/XBP1/FBXW7/BCL2/MCL1/PSAP/TMEM59/VMP1/TP53INP1/HSPB1/TMBIM6	11	B1
GO:0042119	neutrophil activation	11/135	499/17913	0.00140866	0.017998	0.0137517	TXNDC5/PRDX4/DNAJC3/PSAP/CD63/GSTP1/NPC2/HSPA1B/CYBA/CCL5/HSPA1A	11	B1
GO:2001242	regulation of intrinsic apoptotic signaling pathway	10/135	163/17913	4.38e-07	2e-05	1.53e-05	SELENOS/XBP1/FBXW7/BCL2/MCL1/P4HB/HERPUD1/HSPB1/TMBIM6/HSPA1A	10	B1
GO:0007249	I-kappaB kinase/NF-kappaB signaling	10/135	253/17913	2.22e-05	0.000594304	0.000454088	PRDX4/RORA/PELI1/LGALS1/CFLAR/GSTP1/UBC/TNFAIP3/NFKBIA/HSPB1	10	B1
GO:0019058	viral life cycle	10/135	324/17913	0.000174613	0.00366251	0.00279841	GAS6/LDLR/LGALS1/BCL2/P4HB/PPIB/UBC/HSPA1B/CCL5/HSPA1A	10	B1
GO:0030098	lymphocyte differentiation	10/135	325/17913	0.000179017	0.00372386	0.00284528	PRDM1/GAS6/CD27/DNAJB9/RORA/LGALS1/XBP1/KDELR1/BCL2/KLF6	10	B1
GO:0046677	response to antibiotic	10/135	328/17913	0.000192796	0.00394526	0.00301445	SDC1/CD27/JUN/BCL2/PSAP/HSPA5/GSTP1/RHOB/TP53INP1/TNFAIP3	10	B1
GO:0009100	glycoprotein metabolic process	10/135	369/17913	0.00049034	0.00796249	0.00608388	CHPF/SEL1L/DERL3/LMAN1/RPN2/BCL2/KRTCAP2/TMEM59/TMEM258/DAD1	10	B1
GO:0050673	epithelial cell proliferation	10/135	425/17913	0.00143638	0.0182594	0.0139514	ERN1/JUN/MYDGF/XBP1/FBXW7/RGCC/CFLAR/TNFAIP3/CYBA/CCL5	10	B1
GO:0042110	T cell activation	10/135	443/17913	0.00194935	0.022507	0.0171969	PRDM1/CD27/RORA/PELI1/LGALS1/XBP1/KDELR1/BCL2/SELENOK/CCL5	10	B1
GO:0072594	establishment of protein localization to organelle	10/135	452/17913	0.00225647	0.0251307	0.0192015	LMNA/LMAN1/SSR3/FBXW7/BCL2/HSPA5/UBC/TNFAIP3/NFKBIA/SEC61G	10	B1
GO:0050708	regulation of protein secretion	10/135	456/17913	0.00240493	0.0255089	0.0194906	GAS6/PHPT1/DNAJC1/XBP1/RGCC/TNFAIP3/SELENOK/IGHD/TMBIM6/CCL5	10	B1
GO:1903706	regulation of hemopoiesis	10/135	468/17913	0.00289809	0.0289334	0.0221071	PRDM1/TRIB1/GAS6/CD27/JUN/XBP1/FBXW7/NFKBIA/HSPA1B/HSPA1A	10	B1
GO:0002791	regulation of peptide secretion	10/135	483/17913	0.00362507	0.0330591	0.0252594	GAS6/PHPT1/DNAJC1/XBP1/RGCC/TNFAIP3/SELENOK/IGHD/TMBIM6/CCL5	10	B1
GO:0043312	neutrophil degranulation	10/135	485/17913	0.00373208	0.0339121	0.0259111	TXNDC5/PRDX4/DNAJC3/PSAP/CD63/GSTP1/NPC2/HSPA1B/CYBA/HSPA1A	10	B1
GO:0002283	neutrophil activation involved in immune response	10/135	488/17913	0.00389728	0.0351329	0.0268439	TXNDC5/PRDX4/DNAJC3/PSAP/CD63/GSTP1/NPC2/HSPA1B/CYBA/HSPA1A	10	B1
GO:0002446	neutrophil mediated immunity	10/135	499/17913	0.00455333	0.0384225	0.0293574	TXNDC5/PRDX4/DNAJC3/PSAP/CD63/GSTP1/NPC2/HSPA1B/CYBA/HSPA1A	10	B1
GO:0043410	positive regulation of MAPK cascade	10/135	499/17913	0.00455333	0.0384225	0.0293574	ERN1/GAS6/CD27/DUSP5/JUN/MYDGF/FBXW7/PSAP/CFLAR/UBC	10	B1
GO:2001237	negative regulation of extrinsic apoptotic signaling pathway	9/135	100/17913	6.39e-08	3.5e-06	2.67e-06	LMNA/ITGA6/BCL2/MCL1/CFLAR/GSTP1/TNFAIP3/HSPA1B/HSPA1A	9	B1
GO:0003014	renal system process	9/135	120/17913	3.09e-07	1.53e-05	1.17e-05	AQP3/GAS6/BCL2/PSAP/IGHA2/CYBA/JCHAIN/IGKV3-20/IGHA1	9	B1
GO:0033209	tumor necrosis factor-mediated signaling pathway	9/135	167/17913	4.91e-06	0.000162613	0.000124247	GAS6/CD27/TNFRSF17/TNFRSF13B/GSTP1/TNFAIP3/NFKBIA/HSPA1B/HSPA1A	9	B1
GO:0042113	B cell activation	9/135	215/17913	3.7e-05	0.00096006	0.00073355	CD27/DNAJB9/PELI1/LGALS1/XBP1/BCL2/MZB1/KLF6/TNFAIP3	9	B1
GO:0031669	cellular response to nutrient levels	9/135	220/17913	4.43e-05	0.00111402	0.000851183	AQP3/GAS6/JUN/ATF3/HSP90B1/XBP1/BCL2/HSPA5/CYBA	9	B1
GO:0009101	glycoprotein biosynthetic process	9/135	302/17913	0.000477643	0.0078074	0.00596538	CHPF/DERL3/LMAN1/RPN2/BCL2/KRTCAP2/TMEM59/TMEM258/DAD1	9	B1
GO:0010506	regulation of autophagy	9/135	314/17913	0.000631787	0.0095222	0.0072756	ERN1/XBP1/FBXW7/BCL2/MCL1/PSAP/TMEM59/TP53INP1/HSPB1	9	B1
GO:0035690	cellular response to drug	9/135	362/17913	0.00170629	0.0211563	0.0161649	GAS6/HSP90B1/PSAP/CFLAR/HSPA5/RHOB/TP53INP1/TNFAIP3/CYBA	9	B1
GO:0050678	regulation of epithelial cell proliferation	9/135	369/17913	0.0019437	0.022507	0.0171969	JUN/MYDGF/XBP1/FBXW7/RGCC/CFLAR/TNFAIP3/CYBA/CCL5	9	B1
GO:0045089	positive regulation of innate immune response	9/135	373/17913	0.0020908	0.0237052	0.0181124	PELI1/HSP90B1/UBC/TNFAIP3/NFKBIA/HSPA1B/CYBA/CCL5/HSPA1A	9	B1
GO:0022407	regulation of cell-cell adhesion	9/135	389/17913	0.00277058	0.028233	0.0215719	CD27/PELI1/LGALS1/ITGA6/XBP1/CITED2/RGCC/SELENOK/CCL5	9	B1
GO:0045088	regulation of innate immune response	9/135	440/17913	0.00616455	0.0481868	0.036818	PELI1/HSP90B1/UBC/TNFAIP3/NFKBIA/HSPA1B/CYBA/CCL5/HSPA1A	9	B1
GO:0002683	negative regulation of immune system process	9/135	451/17913	0.00720082	0.0533073	0.0407304	TRIB1/LDLR/SELENOS/PELI1/PHPT1/FBXW7/TNFAIP3/NFKBIA/TMBIM6	9	B1
GO:0048871	multicellular organismal homeostasis	9/135	472/17913	0.00954516	0.0626289	0.0478527	AQP3/BCL2/TNFAIP3/HSPB1/IGHA2/IGHG3/JCHAIN/IGKC/IGHA1	9	B1
GO:0098542	defense response to other organism	9/135	481/17913	0.0107105	0.0669945	0.0511883	DNAJC3/BCL2/TNFAIP3/SELENOK/IGHA2/CYBA/JCHAIN/IGKV3-20/IGHA1	9	B1
GO:0030970	retrograde protein transport, ER to cytosol	8/135	29/17913	3.17e-11	7.26e-09	5.54e-09	SEL1L/DERL3/HM13/SELENOS/ERLEC1/HSP90B1/HERPUD1/SEC61B	8	B1
GO:1903513	endoplasmic reticulum to cytosol transport	8/135	29/17913	3.17e-11	7.26e-09	5.54e-09	SEL1L/DERL3/HM13/SELENOS/ERLEC1/HSP90B1/HERPUD1/SEC61B	8	B1
GO:0032527	protein exit from endoplasmic reticulum	8/135	44/17913	1.19e-09	1.43e-07	1.09e-07	SEL1L/DERL3/HM13/SELENOS/ERLEC1/HSP90B1/HERPUD1/SEC61B	8	B1
GO:0006984	ER-nucleus signaling pathway	8/135	46/17913	1.73e-09	1.74e-07	1.33e-07	SELENOS/ATF3/HSP90B1/XBP1/FBXW7/HSPA5/PPP1R15A/HERPUD1	8	B1
GO:0030433	ubiquitin-dependent ERAD pathway	8/135	58/17913	1.18e-08	7.66e-07	5.85e-07	DNAJB9/SEL1L/DERL3/SELENOS/HSP90B1/HSPA5/HERPUD1/SEC61B	8	B1
GO:0070059	intrinsic apoptotic signaling pathway in response to endoplasmic reticulum stress	8/135	59/17913	1.36e-08	8.53e-07	6.52e-07	SELENOS/XBP1/BCL2/PPP1R15A/HERPUD1/SELENOK/TMBIM6/HSPA1A	8	B1
GO:0036498	IRE1-mediated unfolded protein response	8/135	63/17913	2.31e-08	1.35e-06	1.03e-06	ERN1/LMNA/DNAJB9/MYDGF/XBP1/DNAJC3/HSPA5/PDIA6	8	B1
GO:0038095	Fc-epsilon receptor signaling pathway	8/135	169/17913	4.26e-05	0.00108386	0.00082814	JUN/IGLV3-1/IGLV6-57/IGKV4-1/IGKV3-20/IGKC/IGLC7/IGLC2	8	B1
GO:0002221	pattern recognition receptor signaling pathway	8/135	197/17913	0.000124876	0.00278154	0.00212528	PELI1/HSP90B1/UBC/TNFAIP3/NFKBIA/HSPA1B/CYBA/HSPA1A	8	B1
GO:0034284	response to monosaccharide	8/135	200/17913	0.000138599	0.00306013	0.00233814	ERN1/GAS6/SELENOS/PHPT1/LGALS1/XBP1/GSTP1/CYBA	8	B1
GO:0071216	cellular response to biotic stimulus	8/135	206/17913	0.000169793	0.00365273	0.00279093	TRIB1/SELENOS/XBP1/HSPA5/GSTP1/TNFAIP3/NFKBIA/CCL5	8	B1
GO:0001894	tissue homeostasis	8/135	214/17913	0.000220168	0.0043294	0.00330796	BCL2/TNFAIP3/HSPB1/IGHA2/IGHG3/JCHAIN/IGKC/IGHA1	8	B1
GO:0007584	response to nutrient	8/135	215/17913	0.000227247	0.00443397	0.00338785	AQP3/GAS6/HSP90B1/XBP1/GSTP1/DAD1/CYBA/TMBIM6	8	B1
GO:0009743	response to carbohydrate	8/135	224/17913	0.000299771	0.00563078	0.0043023	ERN1/GAS6/SELENOS/PHPT1/LGALS1/XBP1/GSTP1/CYBA	8	B1
GO:0000302	response to reactive oxygen species	8/135	230/17913	0.000357885	0.00634363	0.00484696	SDC1/JUN/BCL2/PSAP/CFLAR/GSTP1/RHOB/TNFAIP3	8	B1
GO:1903362	regulation of cellular protein catabolic process	8/135	230/17913	0.000357885	0.00634363	0.00484696	TRIB1/LDLR/DERL3/ERLEC1/FBXW7/HERPUD1/TNFAIP3/HSPA1A	8	B1
GO:0033002	muscle cell proliferation	8/135	243/17913	0.000515571	0.00826556	0.00631545	ERN1/TRIB1/JUN/CFLAR/GSTP1/TNFAIP3/CYBA/CCL5	8	B1
GO:0051251	positive regulation of lymphocyte activation	8/135	258/17913	0.000763104	0.0110387	0.00843431	GAS6/CD27/PELI1/LGALS1/XBP1/BCL2/SELENOK/CCL5	8	B1
GO:0031647	regulation of protein stability	8/135	272/17913	0.00107305	0.0144431	0.0110355	LMNA/SEL1L/XBP1/FBXW7/BCL2/PPIB/HSPA1B/HSPA1A	8	B1
GO:0032496	response to lipopolysaccharide	8/135	295/17913	0.00179385	0.0218122	0.016666	TRIB1/SELENOS/PELI1/XBP1/GSTP1/TNFAIP3/NFKBIA/CCL5	8	B1
GO:0002758	innate immune response-activating signal transduction	8/135	298/17913	0.00191086	0.022507	0.0171969	PELI1/HSP90B1/UBC/TNFAIP3/NFKBIA/HSPA1B/CYBA/HSPA1A	8	B1
GO:0048193	Golgi vesicle transport	8/135	304/17913	0.00216294	0.0243041	0.01857	GAS6/ANKRD28/LMAN1/KDELR2/KDELR1/TMED9/LMAN2/TMED10	8	B1
GO:0002696	positive regulation of leukocyte activation	8/135	305/17913	0.00220738	0.0246933	0.0188673	GAS6/CD27/PELI1/LGALS1/XBP1/BCL2/SELENOK/CCL5	8	B1
GO:0002237	response to molecule of bacterial origin	8/135	309/17913	0.0023924	0.0255089	0.0194906	TRIB1/SELENOS/PELI1/XBP1/GSTP1/TNFAIP3/NFKBIA/CCL5	8	B1
GO:0002218	activation of innate immune response	8/135	319/17913	0.00290847	0.0289334	0.0221071	PELI1/HSP90B1/UBC/TNFAIP3/NFKBIA/HSPA1B/CYBA/HSPA1A	8	B1
GO:0050867	positive regulation of cell activation	8/135	319/17913	0.00290847	0.0289334	0.0221071	GAS6/CD27/PELI1/LGALS1/XBP1/BCL2/SELENOK/CCL5	8	B1
GO:0045861	negative regulation of proteolysis	8/135	324/17913	0.00319716	0.0308324	0.023558	GAS6/CD27/DERL3/ERLEC1/DNAJC1/CFLAR/TMEM59/HERPUD1	8	B1
GO:0031331	positive regulation of cellular catabolic process	8/135	341/17913	0.00434871	0.0376141	0.0287397	TRIB1/LDLR/FBXW7/TMEM59/HERPUD1/TP53INP1/TNFAIP3/HSPA1A	8	B1
GO:0042176	regulation of protein catabolic process	8/135	354/17913	0.00542696	0.0428203	0.0327176	TRIB1/LDLR/DERL3/ERLEC1/FBXW7/HERPUD1/TNFAIP3/HSPA1A	8	B1
GO:0051098	regulation of binding	8/135	368/17913	0.00680536	0.0517496	0.0395402	JUN/CCPG1/FBXW7/BCL2/HSPA5/HERPUD1/NFKBIA/TMBIM6	8	B1
GO:0009896	positive regulation of catabolic process	8/135	392/17913	0.00976613	0.0632552	0.0483313	TRIB1/LDLR/FBXW7/TMEM59/HERPUD1/TP53INP1/TNFAIP3/HSPA1A	8	B1
GO:0060249	anatomical structure homeostasis	8/135	413/17913	0.0130657	0.0754275	0.0576317	BCL2/TNFAIP3/HSPB1/IGHA2/IGHG3/JCHAIN/IGKC/IGHA1	8	B1
GO:0048732	gland development	8/135	422/17913	0.0147057	0.0829913	0.063411	JUN/XBP1/FBXW7/BCL2/CITED2/DNAAF1/CFLAR/TNFAIP3	8	B1
GO:1901342	regulation of vasculature development	8/135	425/17913	0.0152843	0.0836818	0.0639386	MYDGF/XBP1/FBXW7/RGCC/CFLAR/RHOB/TNFAIP3/HSPB1	8	B1
GO:1904951	positive regulation of establishment of protein localization	8/135	440/17913	0.0184284	0.0937054	0.0715973	GAS6/PHPT1/XBP1/FBXW7/BCL2/RGCC/SELENOK/IGHD	8	B1
GO:0071900	regulation of protein serine/threonine kinase activity	8/135	479/17913	0.0287352	0.125093	0.0955794	ERN1/TRIB1/DUSP5/RGCC/GSTP1/UBC/TNFAIP3/HSPB1	8	B1
GO:1901652	response to peptide	8/135	491/17913	0.0325805	0.136221	0.104082	SELENOS/XBP1/CFLAR/MZB1/GSTP1/TNFAIP3/NFKBIA/CYBA	8	B1
GO:0045454	cell redox homeostasis	7/135	69/17913	8.64e-07	3.51e-05	2.68e-05	TXNDC5/PDIA4/SELENOS/TXNDC11/P4HB/PDIA6/CYBA	7	B1
GO:0036473	cell death in response to oxidative stress	7/135	92/17913	6.07e-06	0.000189853	0.00014506	PDK1/FBXW7/BCL2/MCL1/PSAP/P4HB/HSPB1	7	B1
GO:2001243	negative regulation of intrinsic apoptotic signaling pathway	7/135	94/17913	7.01e-06	0.000213865	0.000163407	SELENOS/XBP1/BCL2/HERPUD1/HSPB1/TMBIM6/HSPA1A	7	B1
GO:0043618	regulation of transcription from RNA polymerase II promoter in response to stress	7/135	109/17913	1.86e-05	0.000502795	0.000384169	JUN/ATF3/CITED2/HSPA5/UBC/TMBIM6/HSPA1A	7	B1
GO:0043620	regulation of DNA-templated transcription in response to stress	7/135	115/17913	2.63e-05	0.000697172	0.000532687	JUN/ATF3/CITED2/HSPA5/UBC/TMBIM6/HSPA1A	7	B1
GO:0001889	liver development	7/135	130/17913	5.78e-05	0.00142584	0.00108944	JUN/XBP1/FBXW7/CITED2/DNAAF1/CFLAR/TNFAIP3	7	B1
GO:0061008	hepaticobiliary system development	7/135	133/17913	6.68e-05	0.00161628	0.00123495	JUN/XBP1/FBXW7/CITED2/DNAAF1/CFLAR/TNFAIP3	7	B1
GO:0032680	regulation of tumor necrosis factor production	7/135	151/17913	0.00014802	0.00323972	0.00247536	GAS6/SELENOS/GSTP1/TNFAIP3/SELENOK/HSPB1/CYBA	7	B1
GO:0032640	tumor necrosis factor production	7/135	155/17913	0.000174022	0.00366251	0.00279841	GAS6/SELENOS/GSTP1/TNFAIP3/SELENOK/HSPB1/CYBA	7	B1
GO:1903555	regulation of tumor necrosis factor superfamily cytokine production	7/135	155/17913	0.000174022	0.00366251	0.00279841	GAS6/SELENOS/GSTP1/TNFAIP3/SELENOK/HSPB1/CYBA	7	B1
GO:0071706	tumor necrosis factor superfamily cytokine production	7/135	161/17913	0.000219846	0.0043294	0.00330796	GAS6/SELENOS/GSTP1/TNFAIP3/SELENOK/HSPB1/CYBA	7	B1
GO:0048660	regulation of smooth muscle cell proliferation	7/135	172/17913	0.000328909	0.00599901	0.00458365	ERN1/TRIB1/JUN/GSTP1/TNFAIP3/CYBA/CCL5	7	B1
GO:0048659	smooth muscle cell proliferation	7/135	174/17913	0.000352738	0.00634172	0.0048455	ERN1/TRIB1/JUN/GSTP1/TNFAIP3/CYBA/CCL5	7	B1
GO:0071222	cellular response to lipopolysaccharide	7/135	176/17913	0.000377932	0.00660593	0.00504738	TRIB1/SELENOS/XBP1/GSTP1/TNFAIP3/NFKBIA/CCL5	7	B1
GO:1903708	positive regulation of hemopoiesis	7/135	182/17913	0.000462275	0.00770561	0.0058876	TRIB1/GAS6/CD27/JUN/XBP1/HSPA1B/HSPA1A	7	B1
GO:0071219	cellular response to molecule of bacterial origin	7/135	183/17913	0.000477688	0.0078074	0.00596538	TRIB1/SELENOS/XBP1/GSTP1/TNFAIP3/NFKBIA/CCL5	7	B1
GO:0051224	negative regulation of protein transport	7/135	189/17913	0.000578992	0.00883226	0.00674845	GAS6/DERL3/ERLEC1/LMAN1/RGCC/TNFAIP3/TMBIM6	7	B1
GO:0009749	response to glucose	7/135	190/17913	0.000597423	0.00905851	0.00692131	ERN1/GAS6/SELENOS/PHPT1/LGALS1/XBP1/CYBA	7	B1
GO:1904950	negative regulation of establishment of protein localization	7/135	193/17913	0.000655528	0.00970568	0.00741579	GAS6/DERL3/ERLEC1/LMAN1/RGCC/TNFAIP3/TMBIM6	7	B1
GO:0009746	response to hexose	7/135	195/17913	0.000696696	0.0102549	0.00783541	ERN1/GAS6/SELENOS/PHPT1/LGALS1/XBP1/CYBA	7	B1
GO:0031396	regulation of protein ubiquitination	7/135	196/17913	0.000718034	0.0105075	0.00802845	PELI1/FBXW7/HSPA5/HERPUD1/TNFAIP3/HSPA1B/HSPA1A	7	B1
GO:0050679	positive regulation of epithelial cell proliferation	7/135	199/17913	0.000785173	0.0111654	0.00853114	JUN/MYDGF/XBP1/CFLAR/TNFAIP3/CYBA/CCL5	7	B1
GO:0070663	regulation of leukocyte proliferation	7/135	214/17913	0.00119901	0.0157183	0.0120098	PELI1/BCL2/MZB1/GSTP1/TNFAIP3/SELENOK/CCL5	7	B1
GO:1903320	regulation of protein modification by small protein conjugation or removal	7/135	223/17913	0.00151925	0.0192158	0.0146822	PELI1/FBXW7/HSPA5/HERPUD1/TNFAIP3/HSPA1B/HSPA1A	7	B1
GO:0043122	regulation of I-kappaB kinase/NF-kappaB signaling	7/135	224/17913	0.00155859	0.0196148	0.014987	RORA/PELI1/LGALS1/CFLAR/GSTP1/TNFAIP3/HSPB1	7	B1
GO:0006486	protein glycosylation	7/135	228/17913	0.00172395	0.0211667	0.0161728	DERL3/LMAN1/RPN2/KRTCAP2/TMEM59/TMEM258/DAD1	7	B1
GO:0043413	macromolecule glycosylation	7/135	228/17913	0.00172395	0.0211667	0.0161728	DERL3/LMAN1/RPN2/KRTCAP2/TMEM59/TMEM258/DAD1	7	B1
GO:0070085	glycosylation	7/135	241/17913	0.00235728	0.0255089	0.0194906	DERL3/LMAN1/RPN2/KRTCAP2/TMEM59/TMEM258/DAD1	7	B1
GO:0097237	cellular response to toxic substance	7/135	241/17913	0.00235728	0.0255089	0.0194906	PRDX4/SELENOS/PSAP/GSTP1/RHOB/TP53INP1/TNFAIP3	7	B1
GO:0022409	positive regulation of cell-cell adhesion	7/135	251/17913	0.00295619	0.0289334	0.0221071	CD27/LGALS1/ITGA6/XBP1/CITED2/SELENOK/CCL5	7	B1
GO:1902105	regulation of leukocyte differentiation	7/135	267/17913	0.00414919	0.0365244	0.0279071	PRDM1/TRIB1/GAS6/CD27/JUN/XBP1/FBXW7	7	B1
GO:0070661	leukocyte proliferation	7/135	270/17913	0.0044085	0.0378768	0.0289404	PELI1/BCL2/MZB1/GSTP1/TNFAIP3/SELENOK/CCL5	7	B1
GO:0030522	intracellular receptor signaling pathway	7/135	272/17913	0.00458806	0.0384225	0.0293574	RORA/CITED2/UBC/TNFAIP3/NFKBIA/HSPA1B/HSPA1A	7	B1
GO:0050863	regulation of T cell activation	7/135	307/17913	0.00871043	0.0594985	0.0454609	PRDM1/CD27/PELI1/LGALS1/XBP1/SELENOK/CCL5	7	B1
GO:0032103	positive regulation of response to external stimulus	7/135	315/17913	0.00994704	0.0638691	0.0488003	GAS6/LDLR/NEAT1/NFKBIA/HSPB1/CYBA/CCL5	7	B1
GO:0009615	response to virus	7/135	323/17913	0.0113075	0.0694169	0.0530392	DNAJC3/BCL2/TNFAIP3/NPC2/SELENOK/HSPB1/CCL5	7	B1
GO:0030336	negative regulation of cell migration	7/135	332/17913	0.0129942	0.0753044	0.0575376	TRIB1/BCL2/CITED2/RGCC/GSTP1/RHOB/TP53INP1	7	B1
GO:0032102	negative regulation of response to external stimulus	7/135	343/17913	0.0152935	0.0836818	0.0639386	TRIB1/LDLR/RORA/SELENOS/NUCB2/GSTP1/TNFAIP3	7	B1
GO:2000146	negative regulation of cell motility	7/135	347/17913	0.0161973	0.0872991	0.0667024	TRIB1/BCL2/CITED2/RGCC/GSTP1/RHOB/TP53INP1	7	B1
GO:0042692	muscle cell differentiation	7/135	359/17913	0.0191362	0.0953777	0.072875	BHLHE41/SDC1/LMNA/RORA/XBP1/BCL2/CFLAR	7	B1
GO:0043687	post-translational protein modification	7/135	360/17913	0.0193969	0.0964861	0.0737219	GAS6/LGALS1/HSP90B1/DNAJC3/FBXW7/P4HB/PDIA6	7	B1
GO:0051271	negative regulation of cellular component movement	7/135	365/17913	0.020738	0.100767	0.076993	TRIB1/BCL2/CITED2/RGCC/GSTP1/RHOB/TP53INP1	7	B1
GO:0010876	lipid localization	7/135	366/17913	0.0210137	0.101869	0.0778346	LDLR/SELENOM/HDLBP/FBXW7/PSAP/NPC2/NFKBIA	7	B1
GO:0048545	response to steroid hormone	7/135	375/17913	0.023612	0.110673	0.0845615	SDC1/RORA/BCL2/CFLAR/GSTP1/FOSB/CYBA	7	B1
GO:0040013	negative regulation of locomotion	7/135	377/17913	0.0242182	0.111848	0.0854594	TRIB1/BCL2/CITED2/RGCC/GSTP1/RHOB/TP53INP1	7	B1
GO:0045765	regulation of angiogenesis	7/135	383/17913	0.0261011	0.117947	0.0901195	MYDGF/XBP1/FBXW7/RGCC/RHOB/TNFAIP3/HSPB1	7	B1
GO:0043062	extracellular structure organization	7/135	387/17913	0.0274107	0.120828	0.0923208	SDC1/GAS6/PRDX4/ITGA6/RGCC/CFLAR/P4HB	7	B1
GO:0045785	positive regulation of cell adhesion	7/135	388/17913	0.027745	0.122088	0.0932833	CD27/LGALS1/ITGA6/XBP1/CITED2/SELENOK/CCL5	7	B1
GO:0051222	positive regulation of protein transport	7/135	403/17913	0.0330968	0.136933	0.104626	GAS6/PHPT1/XBP1/FBXW7/RGCC/SELENOK/IGHD	7	B1
GO:0051047	positive regulation of secretion	7/135	409/17913	0.0354185	0.14241	0.108811	SDC1/PHPT1/XBP1/RGCC/SELENOK/IGHD/CYBA	7	B1
GO:0001933	negative regulation of protein phosphorylation	7/135	416/17913	0.0382613	0.148846	0.113729	TRIB1/JUN/ATF3/DNAJC3/GSTP1/TNFAIP3/HSPB1	7	B1
GO:0034248	regulation of cellular amide metabolic process	7/135	452/17913	0.0552408	0.195283	0.149209	PDK1/DNAJC1/DNAJC3/PPP1R15A/TMED10/HSPB1/CCL5	7	B1
GO:0042326	negative regulation of phosphorylation	7/135	455/17913	0.0568386	0.200088	0.152881	TRIB1/JUN/ATF3/DNAJC3/GSTP1/TNFAIP3/HSPB1	7	B1
GO:0007005	mitochondrion organization	7/135	466/17913	0.0629426	0.216134	0.165141	LMNA/TYMP/JUN/LMAN1/FBXW7/BCL2/HSPA1A	7	B1
GO:0008631	intrinsic apoptotic signaling pathway in response to oxidative stress	6/135	41/17913	5.93e-07	2.49e-05	1.9e-05	PDK1/FBXW7/BCL2/MCL1/P4HB/HSPB1	6	B1
GO:0006487	protein N-linked glycosylation	6/135	63/17913	7.83e-06	0.000231788	0.000177101	DERL3/LMAN1/RPN2/KRTCAP2/TMEM258/DAD1	6	B1
GO:0001895	retina homeostasis	6/135	73/17913	1.84e-05	0.000502795	0.000384169	HSPB1/IGHA2/IGHG3/JCHAIN/IGKC/IGHA1	6	B1
GO:0050864	regulation of B cell activation	6/135	110/17913	0.000184808	0.00381279	0.00291323	CD27/PELI1/XBP1/BCL2/MZB1/TNFAIP3	6	B1
GO:0030183	B cell differentiation	6/135	113/17913	0.000214026	0.0043294	0.00330796	CD27/DNAJB9/LGALS1/XBP1/BCL2/KLF6	6	B1
GO:0046718	viral entry into host cell	6/135	121/17913	0.000309985	0.00573701	0.00438346	GAS6/LDLR/LGALS1/P4HB/HSPA1B/HSPA1A	6	B1
GO:0071333	cellular response to glucose stimulus	6/135	128/17913	0.00041908	0.00712719	0.00544566	ERN1/GAS6/PHPT1/LGALS1/XBP1/CYBA	6	B1
GO:1903364	positive regulation of cellular protein catabolic process	6/135	129/17913	0.000436839	0.00737936	0.00563833	TRIB1/LDLR/FBXW7/HERPUD1/TNFAIP3/HSPA1A	6	B1
GO:0071331	cellular response to hexose stimulus	6/135	130/17913	0.000455181	0.00763794	0.0058359	ERN1/GAS6/PHPT1/LGALS1/XBP1/CYBA	6	B1
GO:0071326	cellular response to monosaccharide stimulus	6/135	131/17913	0.000474118	0.0078074	0.00596538	ERN1/GAS6/PHPT1/LGALS1/XBP1/CYBA	6	B1
GO:0030260	entry into host cell	6/135	134/17913	0.000534634	0.00832521	0.00636103	GAS6/LDLR/LGALS1/P4HB/HSPA1B/HSPA1A	6	B1
GO:0044409	entry into host	6/135	134/17913	0.000534634	0.00832521	0.00636103	GAS6/LDLR/LGALS1/P4HB/HSPA1B/HSPA1A	6	B1
GO:0051806	entry into cell of other organism involved in symbiotic interaction	6/135	134/17913	0.000534634	0.00832521	0.00636103	GAS6/LDLR/LGALS1/P4HB/HSPA1B/HSPA1A	6	B1
GO:0051828	entry into other organism involved in symbiotic interaction	6/135	134/17913	0.000534634	0.00832521	0.00636103	GAS6/LDLR/LGALS1/P4HB/HSPA1B/HSPA1A	6	B1
GO:0009267	cellular response to starvation	6/135	136/17913	0.000578203	0.00883226	0.00674845	GAS6/JUN/ATF3/XBP1/BCL2/HSPA5	6	B1
GO:0032675	regulation of interleukin-6 production	6/135	139/17913	0.000648674	0.00966103	0.00738168	GAS6/SELENOS/XBP1/TNFAIP3/SELENOK/CYBA	6	B1
GO:0071322	cellular response to carbohydrate stimulus	6/135	139/17913	0.000648674	0.00966103	0.00738168	ERN1/GAS6/PHPT1/LGALS1/XBP1/CYBA	6	B1
GO:0001678	cellular glucose homeostasis	6/135	142/17913	0.000725631	0.0105573	0.00806649	ERN1/GAS6/PHPT1/LGALS1/XBP1/CYBA	6	B1
GO:0042542	response to hydrogen peroxide	6/135	144/17913	0.000780735	0.0111654	0.00853114	SDC1/JUN/BCL2/PSAP/RHOB/TNFAIP3	6	B1
GO:0002224	toll-like receptor signaling pathway	6/135	147/17913	0.000869391	0.0120898	0.00923744	PELI1/HSP90B1/UBC/TNFAIP3/NFKBIA/CYBA	6	B1
GO:0032635	interleukin-6 production	6/135	149/17913	0.000932676	0.0127584	0.00974828	GAS6/SELENOS/XBP1/TNFAIP3/SELENOK/CYBA	6	B1
GO:0031960	response to corticosteroid	6/135	155/17913	0.00114398	0.0151548	0.0115793	SDC1/BCL2/CFLAR/GSTP1/FOSB/CYBA	6	B1
GO:0061136	regulation of proteasomal protein catabolic process	6/135	167/17913	0.00167501	0.0208712	0.015947	TRIB1/DERL3/ERLEC1/FBXW7/HERPUD1/HSPA1A	6	B1
GO:0001959	regulation of cytokine-mediated signaling pathway	6/135	170/17913	0.00183303	0.0219702	0.0167867	GAS6/GSTP1/TNFAIP3/HSPA1B/CCL5/HSPA1A	6	B1
GO:0006888	ER to Golgi vesicle-mediated transport	6/135	172/17913	0.0019445	0.022507	0.0171969	GAS6/ANKRD28/LMAN1/KDELR1/TMED9/TMED10	6	B1
GO:0042594	response to starvation	6/135	174/17913	0.00206103	0.0234734	0.0179353	GAS6/JUN/ATF3/XBP1/BCL2/HSPA5	6	B1
GO:0043902	positive regulation of multi-organism process	6/135	180/17913	0.00244245	0.0255089	0.0194906	JUN/LGALS1/P4HB/PPIB/CYBA/CCL5	6	B1
GO:0060759	regulation of response to cytokine stimulus	6/135	183/17913	0.00265199	0.0273398	0.0208895	GAS6/GSTP1/TNFAIP3/HSPA1B/CCL5/HSPA1A	6	B1
GO:0070555	response to interleukin-1	6/135	183/17913	0.00265199	0.0273398	0.0208895	RORA/PELI1/UBC/NFKBIA/CYBA/CCL5	6	B1
GO:0001935	endothelial cell proliferation	6/135	185/17913	0.00279899	0.0284075	0.0217052	ERN1/JUN/MYDGF/XBP1/RGCC/CYBA	6	B1
GO:0002440	production of molecular mediator of immune response	6/135	191/17913	0.00327678	0.0313599	0.0239611	GAS6/DNAJB9/XBP1/KDELR1/MZB1/TMBIM6	6	B1
GO:0045732	positive regulation of protein catabolic process	6/135	192/17913	0.00336198	0.0320418	0.0244821	TRIB1/LDLR/FBXW7/HERPUD1/TNFAIP3/HSPA1A	6	B1
GO:1903050	regulation of proteolysis involved in cellular protein catabolic process	6/135	198/17913	0.0039083	0.0351329	0.0268439	TRIB1/DERL3/ERLEC1/FBXW7/HERPUD1/HSPA1A	6	B1
GO:0050707	regulation of cytokine secretion	6/135	201/17913	0.00420493	0.0367493	0.028079	GAS6/XBP1/RGCC/TNFAIP3/SELENOK/IGHD	6	B1
GO:0050792	regulation of viral process	6/135	204/17913	0.0045179	0.0384225	0.0293574	JUN/LGALS1/BCL2/P4HB/PPIB/CCL5	6	B1
GO:0051701	interaction with host	6/135	211/17913	0.00531471	0.0423097	0.0323275	GAS6/LDLR/LGALS1/P4HB/HSPA1B/HSPA1A	6	B1
GO:0042593	glucose homeostasis	6/135	227/17913	0.00751697	0.0553222	0.0422699	ERN1/GAS6/PHPT1/LGALS1/XBP1/CYBA	6	B1
GO:0033500	carbohydrate homeostasis	6/135	228/17913	0.00767354	0.0560694	0.0428408	ERN1/GAS6/PHPT1/LGALS1/XBP1/CYBA	6	B1
GO:0050663	cytokine secretion	6/135	230/17913	0.00799372	0.0566766	0.0433047	GAS6/XBP1/RGCC/TNFAIP3/SELENOK/IGHD	6	B1
GO:0043903	regulation of symbiosis, encompassing mutualism through parasitism	6/135	232/17913	0.00832343	0.0585197	0.044713	JUN/LGALS1/BCL2/P4HB/PPIB/CCL5	6	B1
GO:0071560	cellular response to transforming growth factor beta stimulus	6/135	233/17913	0.0084919	0.0592081	0.045239	JUN/CITED2/CFLAR/HSPA5/UBC/HSPA1A	6	B1
GO:0030217	T cell differentiation	6/135	234/17913	0.00866281	0.0594985	0.0454609	PRDM1/CD27/RORA/XBP1/KDELR1/BCL2	6	B1
GO:0071559	response to transforming growth factor beta	6/135	239/17913	0.00955461	0.0626289	0.0478527	JUN/CITED2/CFLAR/HSPA5/UBC/HSPA1A	6	B1
GO:0045637	regulation of myeloid cell differentiation	6/135	250/17913	0.0117443	0.0707142	0.0540304	TRIB1/JUN/FBXW7/NFKBIA/HSPA1B/HSPA1A	6	B1
GO:2000027	regulation of animal organ morphogenesis	6/135	250/17913	0.0117443	0.0707142	0.0540304	XBP1/FBXW7/BCL2/CITED2/CFLAR/TNFAIP3	6	B1
GO:0051146	striated muscle cell differentiation	6/135	263/17913	0.0147633	0.0831303	0.0635172	BHLHE41/SDC1/LMNA/XBP1/BCL2/CFLAR	6	B1
GO:0072593	reactive oxygen species metabolic process	6/135	269/17913	0.0163241	0.0875345	0.0668823	RORA/SELENOS/BCL2/CFLAR/GSTP1/CYBA	6	B1
GO:0070372	regulation of ERK1 and ERK2 cascade	6/135	271/17913	0.0168689	0.0891645	0.0681277	GAS6/JUN/ATF3/FBXW7/CFLAR/GSTP1	6	B1
GO:0051348	negative regulation of transferase activity	6/135	272/17913	0.0171459	0.0899086	0.0686963	TRIB1/PHPT1/DNAJC3/GSTP1/TNFAIP3/HSPB1	6	B1
GO:0090287	regulation of cellular response to growth factor stimulus	6/135	276/17913	0.0182853	0.0931662	0.0711853	CITED2/CD63/CFLAR/HSPA5/UBC/HSPA1A	6	B1
GO:0016050	vesicle organization	6/135	280/17913	0.0194757	0.0966871	0.0738755	SDC1/ANKRD28/LMAN1/BCL2/TMED9/TMED10	6	B1
GO:0048511	rhythmic process	6/135	287/17913	0.0216845	0.10416	0.0795852	BHLHE41/RORA/JUN/ATF5/FBXW7/HSPA5	6	B1
GO:0070371	ERK1 and ERK2 cascade	6/135	289/17913	0.0223454	0.106927	0.0816992	GAS6/JUN/ATF3/FBXW7/CFLAR/GSTP1	6	B1
GO:1903037	regulation of leukocyte cell-cell adhesion	6/135	295/17913	0.0244098	0.112116	0.0856639	CD27/PELI1/LGALS1/XBP1/SELENOK/CCL5	6	B1
GO:0071375	cellular response to peptide hormone stimulus	6/135	297/17913	0.0251253	0.115192	0.0880146	SELENOS/XBP1/CFLAR/MZB1/GSTP1/CYBA	6	B1
GO:0032147	activation of protein kinase activity	6/135	303/17913	0.027356	0.120798	0.0922981	ERN1/GAS6/DUSP5/RGCC/UBC/CCL5	6	B1
GO:0007159	leukocyte cell-cell adhesion	6/135	328/17913	0.0380525	0.148757	0.113661	CD27/PELI1/LGALS1/XBP1/SELENOK/CCL5	6	B1
GO:0001101	response to acid chemical	6/135	330/17913	0.0390089	0.150822	0.115238	AQP3/LDLR/XBP1/GSTP1/CYBA/TMBIM6	6	B1
GO:0006869	lipid transport	6/135	332/17913	0.0399805	0.15387	0.117567	LDLR/SELENOM/HDLBP/PSAP/NPC2/NFKBIA	6	B1
GO:0045862	positive regulation of proteolysis	6/135	333/17913	0.040472	0.155524	0.118831	TRIB1/PERP/FBXW7/CFLAR/HERPUD1/HSPA1A	6	B1
GO:0010038	response to metal ion	6/135	335/17913	0.0414665	0.158553	0.121145	AQP3/SDC1/JUN/BCL2/HSPA5/FOSB	6	B1
GO:0006402	mRNA catabolic process	6/135	338/17913	0.0429872	0.162461	0.124131	ERN1/TENT5C/UBC/HSPB1/HSPA1B/HSPA1A	6	B1
GO:0070997	neuron death	6/135	347/17913	0.0477585	0.176258	0.134673	JUN/FBXW7/BCL2/MCL1/HSPA5/CCL5	6	B1
GO:0006605	protein targeting	6/135	364/17913	0.0576376	0.202053	0.154382	LMAN1/SSR3/FBXW7/HSPA5/UBC/SEC61G	6	B1
GO:1901653	cellular response to peptide	6/135	364/17913	0.0576376	0.202053	0.154382	SELENOS/XBP1/CFLAR/MZB1/GSTP1/CYBA	6	B1
GO:0010959	regulation of metal ion transport	6/135	365/17913	0.0582544	0.203491	0.155481	BCL2/AHNAK/CD63/CYBA/TMBIM6/CCL5	6	B1
GO:0006401	RNA catabolic process	6/135	368/17913	0.0601283	0.207889	0.158841	ERN1/TENT5C/UBC/HSPB1/HSPA1B/HSPA1A	6	B1
GO:0006874	cellular calcium ion homeostasis	6/135	375/17913	0.0646399	0.21917	0.167461	HSP90B1/BCL2/HERPUD1/CYBA/TMBIM6/CCL5	6	B1
GO:1903532	positive regulation of secretion by cell	6/135	381/17913	0.0686621	0.228421	0.174529	SDC1/PHPT1/XBP1/RGCC/SELENOK/IGHD	6	B1
GO:0055074	calcium ion homeostasis	6/135	388/17913	0.0735355	0.231361	0.176775	HSP90B1/BCL2/HERPUD1/CYBA/TMBIM6/CCL5	6	B1
GO:0072503	cellular divalent inorganic cation homeostasis	6/135	392/17913	0.0764075	0.237061	0.18113	HSP90B1/BCL2/HERPUD1/CYBA/TMBIM6/CCL5	6	B1
GO:0043434	response to peptide hormone	6/135	404/17913	0.0854023	0.248005	0.189492	SELENOS/XBP1/CFLAR/MZB1/GSTP1/CYBA	6	B1
GO:0030099	myeloid cell differentiation	6/135	411/17913	0.0909098	0.254983	0.194824	TRIB1/JUN/FBXW7/NFKBIA/HSPA1B/HSPA1A	6	B1
GO:0072507	divalent inorganic cation homeostasis	6/135	412/17913	0.0917121	0.254983	0.194824	HSP90B1/BCL2/HERPUD1/CYBA/TMBIM6/CCL5	6	B1
GO:0006816	calcium ion transport	6/135	415/17913	0.0941423	0.255892	0.195519	GAS6/BCL2/AHNAK/CYBA/TMBIM6/CCL5	6	B1
GO:0051346	negative regulation of hydrolase activity	6/135	420/17913	0.0982695	0.263849	0.201598	GAS6/CD27/CFLAR/PPP1R15A/HERPUD1/TMBIM6	6	B1
GO:0048608	reproductive structure development	6/135	426/17913	0.103348	0.268834	0.205407	PRDM1/SDC1/PRDX4/BCL2/CITED2/HSPA5	6	B1
GO:0061458	reproductive system development	6/135	429/17913	0.105939	0.268834	0.205407	PRDM1/SDC1/PRDX4/BCL2/CITED2/HSPA5	6	B1
GO:0070838	divalent metal ion transport	6/135	454/17913	0.128816	0.297459	0.227279	GAS6/BCL2/AHNAK/CYBA/TMBIM6/CCL5	6	B1
GO:0016311	dephosphorylation	6/135	458/17913	0.132684	0.298618	0.228164	DUSP5/PHPT1/HSP90B1/BCL2/PLPP5/PPP1R15A	6	B1
GO:0072511	divalent inorganic cation transport	6/135	458/17913	0.132684	0.298618	0.228164	GAS6/BCL2/AHNAK/CYBA/TMBIM6/CCL5	6	B1
GO:0006875	cellular metal ion homeostasis	6/135	467/17913	0.14159	0.306697	0.234337	HSP90B1/BCL2/HERPUD1/CYBA/TMBIM6/CCL5	6	B1
GO:0050878	regulation of body fluid levels	6/135	499/17913	0.175389	0.341155	0.260666	AQP3/GAS6/LMAN1/XBP1/HSPB1/CYBA	6	B1
GO:1902236	negative regulation of endoplasmic reticulum stress-induced intrinsic apoptotic signaling pathway	5/135	20/17913	3.2e-07	1.55e-05	1.18e-05	SELENOS/XBP1/HERPUD1/TMBIM6/HSPA1A	5	B1
GO:0003094	glomerular filtration	5/135	21/17913	4.17e-07	1.94e-05	1.48e-05	GAS6/IGHA2/JCHAIN/IGKV3-20/IGHA1	5	B1
GO:0097205	renal filtration	5/135	22/17913	5.36e-07	2.33e-05	1.78e-05	GAS6/IGHA2/JCHAIN/IGKV3-20/IGHA1	5	B1
GO:1900101	regulation of endoplasmic reticulum unfolded protein response	5/135	25/17913	1.06e-06	4.18e-05	3.19e-05	ERN1/DNAJB9/XBP1/HSPA5/PPP1R15A	5	B1
GO:1902235	regulation of endoplasmic reticulum stress-induced intrinsic apoptotic signaling pathway	5/135	32/17913	3.86e-06	0.000131269	0.000100299	SELENOS/XBP1/HERPUD1/TMBIM6/HSPA1A	5	B1
GO:0045730	respiratory burst	5/135	34/17913	5.27e-06	0.000170014	0.000129903	SELENOK/IGHA2/CYBA/JCHAIN/IGHA1	5	B1
GO:0070423	nucleotide-binding oligomerization domain containing signaling pathway	5/135	35/17913	6.11e-06	0.000189853	0.00014506	UBC/TNFAIP3/NFKBIA/HSPA1B/HSPA1A	5	B1
GO:0035872	nucleotide-binding domain, leucine rich repeat containing receptor signaling pathway	5/135	36/17913	7.05e-06	0.000213865	0.000163407	UBC/TNFAIP3/NFKBIA/HSPA1B/HSPA1A	5	B1
GO:0002753	cytoplasmic pattern recognition receptor signaling pathway	5/135	61/17913	9.57e-05	0.00215088	0.00164342	UBC/TNFAIP3/NFKBIA/HSPA1B/HSPA1A	5	B1
GO:0010803	regulation of tumor necrosis factor-mediated signaling pathway	5/135	61/17913	9.57e-05	0.00215088	0.00164342	GAS6/GSTP1/TNFAIP3/HSPA1B/HSPA1A	5	B1
GO:1903201	regulation of oxidative stress-induced cell death	5/135	75/17913	0.000255234	0.004904	0.00374699	FBXW7/MCL1/PSAP/P4HB/HSPB1	5	B1
GO:0006890	retrograde vesicle-mediated transport, Golgi to ER	5/135	76/17913	0.000271571	0.00513943	0.00392687	KDELR2/KDELR1/TMED9/LMAN2/TMED10	5	B1
GO:1900407	regulation of cellular response to oxidative stress	5/135	88/17913	0.00053583	0.00832521	0.00636103	FBXW7/MCL1/PSAP/P4HB/HSPB1	5	B1
GO:0032652	regulation of interleukin-1 production	5/135	96/17913	0.000796877	0.0112682	0.00860966	GAS6/GSTP1/TNFAIP3/HSPB1/IGHD	5	B1
GO:1902882	regulation of response to oxidative stress	5/135	97/17913	0.000835166	0.0117437	0.00897294	FBXW7/MCL1/PSAP/P4HB/HSPB1	5	B1
GO:0048524	positive regulation of viral process	5/135	103/17913	0.00109442	0.0145749	0.0111362	JUN/LGALS1/P4HB/PPIB/CCL5	5	B1
GO:0071887	leukocyte apoptotic process	5/135	103/17913	0.00109442	0.0145749	0.0111362	GAS6/CD27/SELENOS/KDELR1/CCL5	5	B1
GO:0032612	interleukin-1 production	5/135	108/17913	0.00135249	0.0173685	0.0132707	GAS6/GSTP1/TNFAIP3/HSPB1/IGHD	5	B1
GO:0022612	gland morphogenesis	5/135	116/17913	0.0018552	0.0221305	0.0169092	XBP1/FBXW7/BCL2/CFLAR/TNFAIP3	5	B1
GO:1903844	regulation of cellular response to transforming growth factor beta stimulus	5/135	117/17913	0.00192648	0.022507	0.0171969	CITED2/CFLAR/HSPA5/UBC/HSPA1A	5	B1
GO:0051592	response to calcium ion	5/135	126/17913	0.0026612	0.0273398	0.0208895	AQP3/SDC1/JUN/HSPA5/FOSB	5	B1
GO:0055088	lipid homeostasis	5/135	132/17913	0.00325212	0.0312427	0.0238715	LDLR/RORA/XBP1/FBXW7/NPC2	5	B1
GO:0051384	response to glucocorticoid	5/135	139/17913	0.00405474	0.0362909	0.0277287	SDC1/BCL2/CFLAR/GSTP1/FOSB	5	B1
GO:0055123	digestive system development	5/135	143/17913	0.00457223	0.0384225	0.0293574	PRDM1/ITGA6/XBP1/BCL2/DNAAF1	5	B1
GO:1902107	positive regulation of leukocyte differentiation	5/135	143/17913	0.00457223	0.0384225	0.0293574	TRIB1/GAS6/CD27/JUN/XBP1	5	B1
GO:0071236	cellular response to antibiotic	5/135	147/17913	0.00513512	0.0412942	0.0315516	PSAP/HSPA5/RHOB/TP53INP1/TNFAIP3	5	B1
GO:1903900	regulation of viral life cycle	5/135	147/17913	0.00513512	0.0412942	0.0315516	LGALS1/BCL2/P4HB/PPIB/CCL5	5	B1
GO:0071347	cellular response to interleukin-1	5/135	156/17913	0.0065783	0.050327	0.0384532	RORA/PELI1/UBC/NFKBIA/CCL5	5	B1
GO:0051100	negative regulation of binding	5/135	162/17913	0.00768531	0.0560694	0.0428408	JUN/FBXW7/HSPA5/NFKBIA/TMBIM6	5	B1
GO:0034614	cellular response to reactive oxygen species	5/135	165/17913	0.00828479	0.0584112	0.0446301	JUN/PSAP/CFLAR/RHOB/TNFAIP3	5	B1
GO:0050728	negative regulation of inflammatory response	5/135	170/17913	0.0093548	0.0618006	0.0472198	LDLR/RORA/SELENOS/GSTP1/TNFAIP3	5	B1
GO:0043433	negative regulation of DNA-binding transcription factor activity	5/135	171/17913	0.0095797	0.0626289	0.0478527	TRIB1/GAS6/PELI1/TNFAIP3/NFKBIA	5	B1
GO:0050821	protein stabilization	5/135	171/17913	0.0095797	0.0626289	0.0478527	SEL1L/FBXW7/PPIB/HSPA1B/HSPA1A	5	B1
GO:0010821	regulation of mitochondrion organization	5/135	175/17913	0.0105166	0.0665081	0.0508167	LMNA/LMAN1/FBXW7/BCL2/HSPA1A	5	B1
GO:2001235	positive regulation of apoptotic signaling pathway	5/135	178/17913	0.0112592	0.0692892	0.0529417	ATF3/FBXW7/BCL2/MCL1/ITM2C	5	B1
GO:0043901	negative regulation of multi-organism process	5/135	182/17913	0.0123039	0.0732126	0.0559394	TRIB1/PRDX4/JUN/TNFAIP3/CCL5	5	B1
GO:0007179	transforming growth factor beta receptor signaling pathway	5/135	184/17913	0.0128502	0.0753044	0.0575376	JUN/CITED2/HSPA5/UBC/HSPA1A	5	B1
GO:0031099	regeneration	5/135	194/17913	0.0158286	0.0861077	0.0657921	GAS6/JUN/BCL2/CFLAR/GSTP1	5	B1
GO:2000377	regulation of reactive oxygen species metabolic process	5/135	194/17913	0.0158286	0.0861077	0.0657921	SELENOS/BCL2/CFLAR/GSTP1/CYBA	5	B1
GO:0032869	cellular response to insulin stimulus	5/135	197/17913	0.0168049	0.0890481	0.0680388	SELENOS/XBP1/CFLAR/MZB1/GSTP1	5	B1
GO:0050870	positive regulation of T cell activation	5/135	198/17913	0.017139	0.0899086	0.0686963	CD27/LGALS1/XBP1/SELENOK/CCL5	5	B1
GO:0050670	regulation of lymphocyte proliferation	5/135	199/17913	0.0174775	0.0902391	0.0689487	PELI1/BCL2/MZB1/SELENOK/CCL5	5	B1
GO:0007254	JNK cascade	5/135	200/17913	0.0178204	0.0911664	0.0696573	ERN1/TRIB1/CD27/GSTP1/UBC	5	B1
GO:0032944	regulation of mononuclear cell proliferation	5/135	200/17913	0.0178204	0.0911664	0.0696573	PELI1/BCL2/MZB1/SELENOK/CCL5	5	B1
GO:0007623	circadian rhythm	5/135	201/17913	0.0181677	0.0927548	0.0708709	BHLHE41/RORA/JUN/ATF5/FBXW7	5	B1
GO:1903039	positive regulation of leukocyte cell-cell adhesion	5/135	214/17913	0.0230955	0.109269	0.0834893	CD27/LGALS1/XBP1/SELENOK/CCL5	5	B1
GO:0008406	gonad development	5/135	217/17913	0.0243441	0.112018	0.0855896	SDC1/PRDX4/BCL2/CITED2/HSPA5	5	B1
GO:0043393	regulation of protein binding	5/135	217/17913	0.0243441	0.112018	0.0855896	CCPG1/BCL2/HSPA5/HERPUD1/TMBIM6	5	B1
GO:0009266	response to temperature stimulus	5/135	219/17913	0.0252002	0.115325	0.0881163	DNAJC3/TP53INP1/NFKBIA/HSPA1B/HSPA1A	5	B1
GO:0033157	regulation of intracellular protein transport	5/135	220/17913	0.0256354	0.116051	0.0886709	GAS6/DERL3/ERLEC1/LMAN1/FBXW7	5	B1
GO:0006469	negative regulation of protein kinase activity	5/135	222/17913	0.0265203	0.118987	0.0909141	TRIB1/DNAJC3/GSTP1/TNFAIP3/HSPB1	5	B1
GO:2000116	regulation of cysteine-type endopeptidase activity	5/135	222/17913	0.0265203	0.118987	0.0909141	GAS6/CD27/PERP/CFLAR/HERPUD1	5	B1
GO:0045137	development of primary sexual characteristics	5/135	223/17913	0.02697	0.119964	0.0916604	SDC1/PRDX4/BCL2/CITED2/HSPA5	5	B1
GO:0015850	organic hydroxy compound transport	5/135	228/17913	0.0292915	0.126678	0.0967908	AQP3/LDLR/SELENOM/NPC2/NFKBIA	5	B1
GO:0007050	cell cycle arrest	5/135	231/17913	0.0307433	0.130711	0.0998721	ERN1/GAS6/RGCC/PPP1R15A/TP53INP1	5	B1
GO:0097305	response to alcohol	5/135	232/17913	0.0312372	0.132363	0.101135	CD27/GSTP1/FOSB/TP53INP1/CYBA	5	B1
GO:1904018	positive regulation of vasculature development	5/135	232/17913	0.0312372	0.132363	0.101135	MYDGF/XBP1/CFLAR/RHOB/HSPB1	5	B1
GO:0031348	negative regulation of defense response	5/135	237/17913	0.0337811	0.138933	0.106154	LDLR/RORA/SELENOS/GSTP1/TNFAIP3	5	B1
GO:0051402	neuron apoptotic process	5/135	238/17913	0.0343049	0.140399	0.107274	JUN/FBXW7/BCL2/MCL1/HSPA5	5	B1
GO:0048872	homeostasis of number of cells	5/135	241/17913	0.0359066	0.143912	0.109959	TNFRSF17/BCL2/TNFAIP3/HSPA1B/HSPA1A	5	B1
GO:0031330	negative regulation of cellular catabolic process	5/135	244/17913	0.0375539	0.148757	0.113661	DERL3/TENT5C/ERLEC1/BCL2/MCL1	5	B1
GO:0033673	negative regulation of kinase activity	5/135	244/17913	0.0375539	0.148757	0.113661	TRIB1/DNAJC3/GSTP1/TNFAIP3/HSPB1	5	B1
GO:0046651	lymphocyte proliferation	5/135	244/17913	0.0375539	0.148757	0.113661	PELI1/BCL2/MZB1/SELENOK/CCL5	5	B1
GO:0051924	regulation of calcium ion transport	5/135	244/17913	0.0375539	0.148757	0.113661	BCL2/AHNAK/CYBA/TMBIM6/CCL5	5	B1
GO:0042742	defense response to bacterium	5/135	245/17913	0.0381131	0.148757	0.113661	IGHA2/CYBA/JCHAIN/IGKV3-20/IGHA1	5	B1
GO:0032943	mononuclear cell proliferation	5/135	246/17913	0.0386775	0.150233	0.114788	PELI1/BCL2/MZB1/SELENOK/CCL5	5	B1
GO:0032868	response to insulin	5/135	252/17913	0.0421712	0.159857	0.122141	SELENOS/XBP1/CFLAR/MZB1/GSTP1	5	B1
GO:0050714	positive regulation of protein secretion	5/135	256/17913	0.0446032	0.167812	0.12822	PHPT1/XBP1/RGCC/SELENOK/IGHD	5	B1
GO:0051091	positive regulation of DNA-binding transcription factor activity	5/135	257/17913	0.0452241	0.169388	0.129424	RGCC/CFLAR/UBC/HSPA1B/HSPA1A	5	B1
GO:0007548	sex differentiation	5/135	269/17913	0.0530793	0.190314	0.145413	SDC1/PRDX4/BCL2/CITED2/HSPA5	5	B1
GO:0009410	response to xenobiotic stimulus	5/135	270/17913	0.0537677	0.192133	0.146803	RORA/CFLAR/HSPA5/GSTP1/FOSB	5	B1
GO:0051403	stress-activated MAPK cascade	5/135	271/17913	0.0544613	0.193586	0.147913	ERN1/TRIB1/CD27/GSTP1/UBC	5	B1
GO:0002793	positive regulation of peptide secretion	5/135	275/17913	0.0572877	0.201387	0.153873	PHPT1/XBP1/RGCC/SELENOK/IGHD	5	B1
GO:0031098	stress-activated protein kinase signaling cascade	5/135	278/17913	0.0594621	0.205868	0.157297	ERN1/TRIB1/CD27/GSTP1/UBC	5	B1
GO:0051235	maintenance of location	5/135	286/17913	0.065489	0.221256	0.169055	HSP90B1/FBXW7/HSPA5/NFKBIA/CYBA	5	B1
GO:0000209	protein polyubiquitination	5/135	288/17913	0.0670475	0.224712	0.171695	PELI1/FBXW7/BCL2/UBC/TNFAIP3	5	B1
GO:0009895	negative regulation of catabolic process	5/135	288/17913	0.0670475	0.224712	0.171695	DERL3/TENT5C/ERLEC1/BCL2/MCL1	5	B1
GO:0001818	negative regulation of cytokine production	5/135	290/17913	0.0686267	0.228421	0.174529	GAS6/SELENOS/RGCC/GSTP1/TNFAIP3	5	B1
GO:0072001	renal system development	5/135	291/17913	0.069424	0.230095	0.175808	SDC1/ITGA6/BCL2/CFLAR/TMED10	5	B1
GO:0010632	regulation of epithelial cell migration	5/135	294/17913	0.0718468	0.230095	0.175808	JUN/FBXW7/RGCC/RHOB/HSPB1	5	B1
GO:0006470	protein dephosphorylation	5/135	313/17913	0.0882553	0.25072	0.191567	DUSP5/PHPT1/HSP90B1/BCL2/PPP1R15A	5	B1
GO:1901214	regulation of neuron death	5/135	313/17913	0.0882553	0.25072	0.191567	JUN/FBXW7/BCL2/MCL1/CCL5	5	B1
GO:0010721	negative regulation of cell development	5/135	317/17913	0.0919404	0.254983	0.194824	LDLR/LGALS1/FBXW7/BCL2/ITM2C	5	B1
GO:0031589	cell-substrate adhesion	5/135	322/17913	0.0966574	0.261713	0.199966	GAS6/LGALS1/ITGA6/BCL2/CD63	5	B1
GO:0043405	regulation of MAP kinase activity	5/135	322/17913	0.0966574	0.261713	0.199966	ERN1/TRIB1/DUSP5/GSTP1/UBC	5	B1
GO:0007178	transmembrane receptor protein serine/threonine kinase signaling pathway	5/135	323/17913	0.0976154	0.263342	0.201211	JUN/CITED2/HSPA5/UBC/HSPA1A	5	B1
GO:0001655	urogenital system development	5/135	324/17913	0.0985782	0.263849	0.201598	SDC1/ITGA6/BCL2/CFLAR/TMED10	5	B1
GO:0030198	extracellular matrix organization	5/135	334/17913	0.10847	0.271121	0.207155	GAS6/PRDX4/ITGA6/RGCC/CFLAR	5	B1
GO:0010631	epithelial cell migration	5/135	354/17913	0.129643	0.298	0.227692	JUN/FBXW7/RGCC/RHOB/HSPB1	5	B1
GO:0090132	epithelium migration	5/135	357/17913	0.132972	0.298618	0.228164	JUN/FBXW7/RGCC/RHOB/HSPB1	5	B1
GO:0090130	tissue migration	5/135	363/17913	0.139745	0.30486	0.232934	JUN/FBXW7/RGCC/RHOB/HSPB1	5	B1
GO:0010256	endomembrane system organization	5/135	365/17913	0.142036	0.307399	0.234874	LMNA/LMAN1/PSAP/RAB30/TMED9	5	B1
GO:0052548	regulation of endopeptidase activity	5/135	370/17913	0.147836	0.312429	0.238717	GAS6/CD27/PERP/CFLAR/HERPUD1	5	B1
GO:0006417	regulation of translation	5/135	397/17913	0.18082	0.345576	0.264044	DNAJC1/DNAJC3/PPP1R15A/HSPB1/CCL5	5	B1
GO:0052547	regulation of peptidase activity	5/135	398/17913	0.182092	0.347069	0.265184	GAS6/CD27/PERP/CFLAR/HERPUD1	5	B1
GO:0032386	regulation of intracellular transport	5/135	400/17913	0.184646	0.349593	0.267113	GAS6/DERL3/ERLEC1/LMAN1/FBXW7	5	B1
GO:0019216	regulation of lipid metabolic process	5/135	402/17913	0.187214	0.353767	0.270302	LDLR/PDK1/RORA/FBXW7/NPC2	5	B1
GO:0043588	skin development	5/135	412/17913	0.200245	0.368164	0.281302	AQP3/PERP/ITGA6/BCL2/PSAP	5	B1
GO:0009314	response to radiation	5/135	435/17913	0.231325	0.394609	0.301508	BCL2/HSPA5/RHOB/TP53INP1/CYBA	5	B1
GO:0001667	ameboidal-type cell migration	5/135	446/17913	0.246667	0.406588	0.310661	JUN/FBXW7/RGCC/RHOB/HSPB1	5	B1
GO:0003012	muscle system process	5/135	448/17913	0.249485	0.407914	0.311674	LMNA/JSRP1/CFLAR/TPM4/CYBA	5	B1
GO:0051656	establishment of organelle localization	5/135	448/17913	0.249485	0.407914	0.311674	MEI1/ANKRD28/LMAN1/TMED9/TMED10	5	B1
GO:0010975	regulation of neuron projection development	5/135	458/17913	0.263701	0.421209	0.321832	LGALS1/ITGA6/CFLAR/ITM2C/HSPA5	5	B1
GO:0000226	microtubule cytoskeleton organization	5/135	460/17913	0.266567	0.421209	0.321832	LMNA/ATF5/DNAAF1/HSPA1B/HSPA1A	5	B1
GO:0051493	regulation of cytoskeleton organization	5/135	472/17913	0.283908	0.43573	0.332927	PHPT1/ATF5/RGCC/HSPA1B/HSPA1A	5	B1
GO:0060627	regulation of vesicle-mediated transport	5/135	480/17913	0.295592	0.443429	0.33881	SDC1/GAS6/CD63/LMAN2/CYBA	5	B1
GO:0097201	negative regulation of transcription from RNA polymerase II promoter in response to stress	4/135	12/17913	1.46e-06	5.56e-05	4.25e-05	JUN/CITED2/TMBIM6/HSPA1A	4	B1
GO:0070431	nucleotide-binding oligomerization domain containing 2 signaling pathway	4/135	13/17913	2.09e-06	7.63e-05	5.83e-05	TNFAIP3/NFKBIA/HSPA1B/HSPA1A	4	B1
GO:2000345	regulation of hepatocyte proliferation	4/135	14/17913	2.91e-06	0.000101825	7.78e-05	XBP1/FBXW7/CFLAR/TNFAIP3	4	B1
GO:0072574	hepatocyte proliferation	4/135	18/17913	8.7e-06	0.000251643	0.000192272	XBP1/FBXW7/CFLAR/TNFAIP3	4	B1
GO:0072575	epithelial cell proliferation involved in liver morphogenesis	4/135	18/17913	8.7e-06	0.000251643	0.000192272	XBP1/FBXW7/CFLAR/TNFAIP3	4	B1
GO:0072576	liver morphogenesis	4/135	19/17913	1.1e-05	0.000309766	0.000236682	XBP1/FBXW7/CFLAR/TNFAIP3	4	B1
GO:0036499	PERK-mediated unfolded protein response	4/135	21/17913	1.67e-05	0.000462361	0.000353275	ATF3/HSPA5/PPP1R15A/HERPUD1	4	B1
GO:1902175	regulation of oxidative stress-induced intrinsic apoptotic signaling pathway	4/135	26/17913	4.06e-05	0.00104155	0.000795811	FBXW7/MCL1/P4HB/HSPB1	4	B1
GO:0018279	protein N-linked glycosylation via asparagine	4/135	31/17913	8.29e-05	0.00196835	0.00150395	DERL3/LMAN1/RPN2/DAD1	4	B1
GO:0018196	peptidyl-asparagine modification	4/135	32/17913	9.42e-05	0.00215088	0.00164342	DERL3/LMAN1/RPN2/DAD1	4	B1
GO:1901099	negative regulation of signal transduction in absence of ligand	4/135	32/17913	9.42e-05	0.00215088	0.00164342	BCL2/MCL1/HSPA1B/HSPA1A	4	B1
GO:2001240	negative regulation of extrinsic apoptotic signaling pathway in absence of ligand	4/135	32/17913	9.42e-05	0.00215088	0.00164342	BCL2/MCL1/HSPA1B/HSPA1A	4	B1
GO:1905898	positive regulation of response to endoplasmic reticulum stress	4/135	37/17913	0.000168011	0.00364554	0.00278544	ERN1/XBP1/PPP1R15A/HERPUD1	4	B1
GO:2001239	regulation of extrinsic apoptotic signaling pathway in absence of ligand	4/135	43/17913	0.000303156	0.00565217	0.00431864	BCL2/MCL1/HSPA1B/HSPA1A	4	B1
GO:0019731	antibacterial humoral response	4/135	44/17913	0.000331536	0.00600342	0.00458702	IGHA2/JCHAIN/IGKV3-20/IGHA1	4	B1
GO:0018208	peptidyl-proline modification	4/135	45/17913	0.000361769	0.00636763	0.0048653	FKBP11/FKBP2/P4HB/PPIB	4	B1
GO:2000107	negative regulation of leukocyte apoptotic process	4/135	46/17913	0.000393924	0.00683797	0.00522467	GAS6/CD27/SELENOS/CCL5	4	B1
GO:0031663	lipopolysaccharide-mediated signaling pathway	4/135	55/17913	0.000781332	0.0111654	0.00853114	TRIB1/TNFAIP3/NFKBIA/CCL5	4	B1
GO:0010830	regulation of myotube differentiation	4/135	59/17913	0.00101873	0.0137857	0.0105332	BHLHE41/XBP1/BCL2/CFLAR	4	B1
GO:1903902	positive regulation of viral life cycle	4/135	59/17913	0.00101873	0.0137857	0.0105332	LGALS1/P4HB/PPIB/CCL5	4	B1
GO:0038034	signal transduction in absence of ligand	4/135	62/17913	0.00122711	0.0159208	0.0121646	BCL2/MCL1/HSPA1B/HSPA1A	4	B1
GO:0097192	extrinsic apoptotic signaling pathway in absence of ligand	4/135	62/17913	0.00122711	0.0159208	0.0121646	BCL2/MCL1/HSPA1B/HSPA1A	4	B1
GO:0006901	vesicle coating	4/135	67/17913	0.0016379	0.0205105	0.0156714	ANKRD28/LMAN1/TMED9/TMED10	4	B1
GO:0006446	regulation of translational initiation	4/135	69/17913	0.0018261	0.0219702	0.0167867	DNAJC3/PPP1R15A/HSPB1/CCL5	4	B1
GO:0032720	negative regulation of tumor necrosis factor production	4/135	69/17913	0.0018261	0.0219702	0.0167867	GAS6/SELENOS/GSTP1/TNFAIP3	4	B1
GO:0048199	vesicle targeting, to, from or within Golgi	4/135	70/17913	0.00192559	0.022507	0.0171969	ANKRD28/LMAN1/TMED9/TMED10	4	B1
GO:0050871	positive regulation of B cell activation	4/135	70/17913	0.00192559	0.022507	0.0171969	CD27/PELI1/XBP1/BCL2	4	B1
GO:0031670	cellular response to nutrient	4/135	71/17913	0.00202878	0.023211	0.0177348	GAS6/HSP90B1/XBP1/CYBA	4	B1
GO:1903556	negative regulation of tumor necrosis factor superfamily cytokine production	4/135	71/17913	0.00202878	0.023211	0.0177348	GAS6/SELENOS/GSTP1/TNFAIP3	4	B1
GO:0048194	Golgi vesicle budding	4/135	75/17913	0.00247982	0.0257922	0.019707	ANKRD28/LMAN1/TMED9/TMED10	4	B1
GO:0034109	homotypic cell-cell adhesion	4/135	77/17913	0.00272929	0.0279252	0.0213368	GAS6/LGALS1/HSPB1/CCL5	4	B1
GO:0043154	negative regulation of cysteine-type endopeptidase activity involved in apoptotic process	4/135	79/17913	0.00299543	0.0291101	0.0222421	GAS6/CD27/CFLAR/HERPUD1	4	B1
GO:1903845	negative regulation of cellular response to transforming growth factor beta stimulus	4/135	80/17913	0.00313493	0.0303485	0.0231883	CFLAR/HSPA5/UBC/HSPA1A	4	B1
GO:2000060	positive regulation of ubiquitin-dependent protein catabolic process	4/135	82/17913	0.0034271	0.0323072	0.0246849	TRIB1/FBXW7/HERPUD1/HSPA1A	4	B1
GO:2000106	regulation of leukocyte apoptotic process	4/135	82/17913	0.0034271	0.0323072	0.0246849	GAS6/CD27/SELENOS/CCL5	4	B1
GO:0008625	extrinsic apoptotic signaling pathway via death domain receptors	4/135	83/17913	0.00357991	0.0328855	0.0251267	ATF3/BCL2/CFLAR/TNFAIP3	4	B1
GO:0014910	regulation of smooth muscle cell migration	4/135	85/17913	0.00389927	0.0351329	0.0268439	TRIB1/BCL2/GSTP1/CCL5	4	B1
GO:0048145	regulation of fibroblast proliferation	4/135	86/17913	0.00406597	0.0362909	0.0277287	GAS6/JUN/GSTP1/TP53INP1	4	B1
GO:0048144	fibroblast proliferation	4/135	87/17913	0.00423741	0.0367778	0.0281007	GAS6/JUN/GSTP1/TP53INP1	4	B1
GO:2000117	negative regulation of cysteine-type endopeptidase activity	4/135	87/17913	0.00423741	0.0367778	0.0281007	GAS6/CD27/CFLAR/HERPUD1	4	B1
GO:1904035	regulation of epithelial cell apoptotic process	4/135	88/17913	0.00441368	0.0378768	0.0289404	GAS6/RGCC/CFLAR/TNFAIP3	4	B1
GO:0006903	vesicle targeting	4/135	89/17913	0.00459483	0.0384225	0.0293574	ANKRD28/LMAN1/TMED9/TMED10	4	B1
GO:0045639	positive regulation of myeloid cell differentiation	4/135	90/17913	0.00478091	0.0397147	0.0303447	TRIB1/JUN/HSPA1B/HSPA1A	4	B1
GO:0006900	vesicle budding from membrane	4/135	91/17913	0.004972	0.0405001	0.0309448	ANKRD28/LMAN1/TMED9/TMED10	4	B1
GO:0014909	smooth muscle cell migration	4/135	91/17913	0.004972	0.0405001	0.0309448	TRIB1/BCL2/GSTP1/CCL5	4	B1
GO:0042632	cholesterol homeostasis	4/135	91/17913	0.004972	0.0405001	0.0309448	LDLR/RORA/XBP1/NPC2	4	B1
GO:0055092	sterol homeostasis	4/135	92/17913	0.00516815	0.0414275	0.0316534	LDLR/RORA/XBP1/NPC2	4	B1
GO:1901800	positive regulation of proteasomal protein catabolic process	4/135	93/17913	0.00536943	0.0424995	0.0324725	TRIB1/FBXW7/HERPUD1/HSPA1A	4	B1
GO:0002377	immunoglobulin production	4/135	98/17913	0.00645464	0.0495315	0.0378454	DNAJB9/XBP1/MZB1/TMBIM6	4	B1
GO:0098869	cellular oxidant detoxification	4/135	99/17913	0.00668786	0.0510101	0.0389752	PRDX4/SELENOS/GSTP1/TP53INP1	4	B1
GO:0048661	positive regulation of smooth muscle cell proliferation	4/135	101/17913	0.00717089	0.0532423	0.0406807	ERN1/JUN/CYBA/CCL5	4	B1
GO:0097006	regulation of plasma lipoprotein particle levels	4/135	102/17913	0.00742082	0.0547748	0.0418517	LDLR/HDLBP/P4HB/NPC2	4	B1
GO:0014812	muscle cell migration	4/135	103/17913	0.00767644	0.0560694	0.0428408	TRIB1/BCL2/GSTP1/CCL5	4	B1
GO:0019730	antimicrobial humoral response	4/135	106/17913	0.00847787	0.0592081	0.045239	IGHA2/JCHAIN/IGKV3-20/IGHA1	4	B1
GO:0043200	response to amino acid	4/135	106/17913	0.00847787	0.0592081	0.045239	XBP1/GSTP1/CYBA/TMBIM6	4	B1
GO:0014902	myotube differentiation	4/135	107/17913	0.00875671	0.0594985	0.0454609	BHLHE41/XBP1/BCL2/CFLAR	4	B1
GO:1990748	cellular detoxification	4/135	107/17913	0.00875671	0.0594985	0.0454609	PRDX4/SELENOS/GSTP1/TP53INP1	4	B1
GO:1903052	positive regulation of proteolysis involved in cellular protein catabolic process	4/135	109/17913	0.00933225	0.0618006	0.0472198	TRIB1/FBXW7/HERPUD1/HSPA1A	4	B1
GO:1904019	epithelial cell apoptotic process	4/135	111/17913	0.0099319	0.0638691	0.0488003	GAS6/RGCC/CFLAR/TNFAIP3	4	B1
GO:1903828	negative regulation of cellular protein localization	4/135	112/17913	0.0102409	0.0654221	0.0499869	DERL3/ERLEC1/LMAN1/TMEM59	4	B1
GO:0098754	detoxification	4/135	113/17913	0.010556	0.0665904	0.0508796	PRDX4/SELENOS/GSTP1/TP53INP1	4	B1
GO:0017015	regulation of transforming growth factor beta receptor signaling pathway	4/135	115/17913	0.011205	0.0691252	0.0528163	CITED2/HSPA5/UBC/HSPA1A	4	B1
GO:0043484	regulation of RNA splicing	4/135	115/17913	0.011205	0.0691252	0.0528163	ERN1/AHNAK/TMBIM6/HSPA1A	4	B1
GO:0051153	regulation of striated muscle cell differentiation	4/135	115/17913	0.011205	0.0691252	0.0528163	BHLHE41/XBP1/BCL2/CFLAR	4	B1
GO:0008637	apoptotic mitochondrial changes	4/135	119/17913	0.0125789	0.0746726	0.0570549	LMNA/JUN/BCL2/HSPA1A	4	B1
GO:0019079	viral genome replication	4/135	120/17913	0.0129385	0.0753044	0.0575376	GAS6/BCL2/PPIB/CCL5	4	B1
GO:0050671	positive regulation of lymphocyte proliferation	4/135	125/17913	0.0148345	0.0833447	0.0636809	PELI1/BCL2/SELENOK/CCL5	4	B1
GO:0032946	positive regulation of mononuclear cell proliferation	4/135	126/17913	0.0152336	0.0836818	0.0639386	PELI1/BCL2/SELENOK/CCL5	4	B1
GO:0042476	odontogenesis	4/135	126/17913	0.0152336	0.0836818	0.0639386	AQP3/SDC1/PERP/ITGA6	4	B1
GO:0002576	platelet degranulation	4/135	128/17913	0.0160521	0.0867018	0.066246	GAS6/MANF/PSAP/CD63	4	B1
GO:0070972	protein localization to endoplasmic reticulum	4/135	128/17913	0.0160521	0.0867018	0.066246	SSR3/HSPA5/PPP1R15A/SEC61G	4	B1
GO:0046683	response to organophosphorus	4/135	130/17913	0.0168977	0.0891645	0.0681277	SDC1/HSP90B1/HSPA5/FOSB	4	B1
GO:0048565	digestive tract development	4/135	132/17913	0.0177707	0.0911664	0.0696573	PRDM1/ITGA6/BCL2/DNAAF1	4	B1
GO:0050715	positive regulation of cytokine secretion	4/135	132/17913	0.0177707	0.0911664	0.0696573	XBP1/RGCC/SELENOK/IGHD	4	B1
GO:0070665	positive regulation of leukocyte proliferation	4/135	134/17913	0.0186714	0.0938226	0.0716868	PELI1/BCL2/SELENOK/CCL5	4	B1
GO:0008584	male gonad development	4/135	137/17913	0.0200748	0.098304	0.0751109	SDC1/PRDX4/BCL2/CITED2	4	B1
GO:0050709	negative regulation of protein secretion	4/135	137/17913	0.0200748	0.098304	0.0751109	GAS6/RGCC/TNFAIP3/TMBIM6	4	B1
GO:2000058	regulation of ubiquitin-dependent protein catabolic process	4/135	137/17913	0.0200748	0.098304	0.0751109	TRIB1/FBXW7/HERPUD1/HSPA1A	4	B1
GO:0046546	development of primary male sexual characteristics	4/135	138/17913	0.0205567	0.10008	0.0764675	SDC1/PRDX4/BCL2/CITED2	4	B1
GO:0002831	regulation of response to biotic stimulus	4/135	139/17913	0.0210456	0.101869	0.0778346	TRIB1/TNFAIP3/SELENOK/CYBA	4	B1
GO:0045807	positive regulation of endocytosis	4/135	141/17913	0.0220448	0.105689	0.0807537	GAS6/CD63/LMAN2/CYBA	4	B1
GO:0002792	negative regulation of peptide secretion	4/135	142/17913	0.0225551	0.107598	0.0822122	GAS6/RGCC/TNFAIP3/TMBIM6	4	B1
GO:0010212	response to ionizing radiation	4/135	144/17913	0.0235973	0.110673	0.0845615	BCL2/HSPA5/RHOB/CYBA	4	B1
GO:0014074	response to purine-containing compound	4/135	145/17913	0.0241292	0.111642	0.085302	SDC1/HSP90B1/HSPA5/FOSB	4	B1
GO:0055002	striated muscle cell development	4/135	145/17913	0.0241292	0.111642	0.085302	SDC1/LMNA/BCL2/CFLAR	4	B1
GO:0035264	multicellular organism growth	4/135	149/17913	0.0263293	0.118553	0.0905823	SELENOM/ATF5/BCL2/PPIB	4	B1
GO:0051092	positive regulation of NF-kappaB transcription factor activity	4/135	149/17913	0.0263293	0.118553	0.0905823	CFLAR/UBC/HSPA1B/HSPA1A	4	B1
GO:0030902	hindbrain development	4/135	150/17913	0.0268976	0.119964	0.0916604	RORA/ATF5/BCL2/HSPA5	4	B1
GO:0090288	negative regulation of cellular response to growth factor stimulus	4/135	156/17913	0.0304613	0.129951	0.0992914	CFLAR/HSPA5/UBC/HSPA1A	4	B1
GO:0043488	regulation of mRNA stability	4/135	158/17913	0.0317083	0.133238	0.101803	TENT5C/UBC/HSPB1/HSPA1A	4	B1
GO:0055001	muscle cell development	4/135	159/17913	0.0323429	0.135453	0.103495	SDC1/LMNA/BCL2/CFLAR	4	B1
GO:0046661	male sex differentiation	4/135	160/17913	0.032985	0.136933	0.104626	SDC1/PRDX4/BCL2/CITED2	4	B1
GO:0043487	regulation of RNA stability	4/135	163/17913	0.0349558	0.141264	0.107935	TENT5C/UBC/HSPB1/HSPA1A	4	B1
GO:0045619	regulation of lymphocyte differentiation	4/135	164/17913	0.0356277	0.143022	0.109278	PRDM1/GAS6/CD27/XBP1	4	B1
GO:0001936	regulation of endothelial cell proliferation	4/135	170/17913	0.0398158	0.153706	0.117442	JUN/MYDGF/RGCC/CYBA	4	B1
GO:0071478	cellular response to radiation	4/135	173/17913	0.0420109	0.159489	0.121861	HSPA5/RHOB/TP53INP1/CYBA	4	B1
GO:0061013	regulation of mRNA catabolic process	4/135	178/17913	0.0458192	0.171362	0.130933	TENT5C/UBC/HSPB1/HSPA1A	4	B1
GO:0007219	Notch signaling pathway	4/135	179/17913	0.0466033	0.173779	0.132779	PERP/SEL1L/FBXW7/NFKBIA	4	B1
GO:0006413	translational initiation	4/135	183/17913	0.0498145	0.181714	0.138842	DNAJC3/PPP1R15A/HSPB1/CCL5	4	B1
GO:0051147	regulation of muscle cell differentiation	4/135	185/17913	0.0514648	0.186384	0.14241	BHLHE41/XBP1/BCL2/CFLAR	4	B1
GO:0050920	regulation of chemotaxis	4/135	186/17913	0.0523011	0.188869	0.144309	GAS6/GSTP1/HSPB1/CCL5	4	B1
GO:0070374	positive regulation of ERK1 and ERK2 cascade	4/135	186/17913	0.0523011	0.188869	0.144309	GAS6/JUN/FBXW7/CFLAR	4	B1
GO:0007565	female pregnancy	4/135	193/17913	0.0583627	0.203491	0.155481	PRDM1/BCL2/FOSB/VMP1	4	B1
GO:0071241	cellular response to inorganic substance	4/135	194/17913	0.0592581	0.205445	0.156973	JUN/CFLAR/HSPA5/FOSB	4	B1
GO:0043281	regulation of cysteine-type endopeptidase activity involved in apoptotic process	4/135	196/17913	0.0610711	0.210859	0.16111	GAS6/CD27/CFLAR/HERPUD1	4	B1
GO:0002064	epithelial cell development	4/135	199/17913	0.0638452	0.217454	0.166149	PRDM1/SDC1/XBP1/PSAP	4	B1
GO:0032886	regulation of microtubule-based process	4/135	199/17913	0.0638452	0.217454	0.166149	ATF5/DNAAF1/HSPA1B/HSPA1A	4	B1
GO:0009612	response to mechanical stimulus	4/135	200/17913	0.0647845	0.21917	0.167461	JUN/FOSB/NFKBIA/CYBA	4	B1
GO:1903531	negative regulation of secretion by cell	4/135	202/17913	0.0666848	0.224128	0.171249	GAS6/RGCC/TNFAIP3/TMBIM6	4	B1
GO:0045766	positive regulation of angiogenesis	4/135	203/17913	0.0676458	0.226416	0.172997	MYDGF/XBP1/RHOB/HSPB1	4	B1
GO:0006006	glucose metabolic process	4/135	204/17913	0.068614	0.228421	0.174529	PDK1/RORA/SELENOS/ATF3	4	B1
GO:0010951	negative regulation of endopeptidase activity	4/135	210/17913	0.0745733	0.234041	0.178823	GAS6/CD27/CFLAR/HERPUD1	4	B1
GO:0043523	regulation of neuron apoptotic process	4/135	210/17913	0.0745733	0.234041	0.178823	JUN/FBXW7/BCL2/MCL1	4	B1
GO:0090092	regulation of transmembrane receptor protein serine/threonine kinase signaling pathway	4/135	215/17913	0.0797337	0.237061	0.18113	CITED2/HSPA5/UBC/HSPA1A	4	B1
GO:0045444	fat cell differentiation	4/135	222/17913	0.0872495	0.248987	0.190243	RORA/ITGA6/ATF5/XBP1	4	B1
GO:0010466	negative regulation of peptidase activity	4/135	223/17913	0.0883505	0.25072	0.191567	GAS6/CD27/CFLAR/HERPUD1	4	B1
GO:0006839	mitochondrial transport	4/135	224/17913	0.0894582	0.252712	0.193089	LMAN1/FBXW7/BCL2/HSPA1A	4	B1
GO:0044706	multi-multicellular organism process	4/135	225/17913	0.0905727	0.254983	0.194824	PRDM1/BCL2/FOSB/VMP1	4	B1
GO:0051048	negative regulation of secretion	4/135	226/17913	0.0916939	0.254983	0.194824	GAS6/RGCC/TNFAIP3/TMBIM6	4	B1
GO:0010594	regulation of endothelial cell migration	4/135	231/17913	0.0973991	0.26304	0.200981	FBXW7/RGCC/RHOB/HSPB1	4	B1
GO:0051607	defense response to virus	4/135	231/17913	0.0973991	0.26304	0.200981	DNAJC3/BCL2/TNFAIP3/SELENOK	4	B1
GO:0019318	hexose metabolic process	4/135	239/17913	0.106865	0.268834	0.205407	PDK1/RORA/SELENOS/ATF3	4	B1
GO:0031334	positive regulation of protein complex assembly	4/135	239/17913	0.106865	0.268834	0.205407	JUN/HSPA1B/JCHAIN/HSPA1A	4	B1
GO:0051650	establishment of vesicle localization	4/135	253/17913	0.124387	0.29274	0.223673	ANKRD28/LMAN1/TMED9/TMED10	4	B1
GO:0060326	cell chemotaxis	4/135	253/17913	0.124387	0.29274	0.223673	GAS6/GSTP1/HSPB1/CCL5	4	B1
GO:0016579	protein deubiquitination	4/135	260/17913	0.133579	0.298618	0.228164	UBC/TNFAIP3/OTUD1/NFKBIA	4	B1
GO:0030100	regulation of endocytosis	4/135	262/17913	0.136256	0.302431	0.231078	GAS6/CD63/LMAN2/CYBA	4	B1
GO:0072331	signal transduction by p53 class mediator	4/135	264/17913	0.138955	0.30486	0.232934	PERP/BCL2/RGCC/TP53INP1	4	B1
GO:0051648	vesicle localization	4/135	270/17913	0.14718	0.31209	0.238458	ANKRD28/LMAN1/TMED9/TMED10	4	B1
GO:0070646	protein modification by small protein removal	4/135	273/17913	0.151362	0.317785	0.242809	UBC/TNFAIP3/OTUD1/NFKBIA	4	B1
GO:0043542	endothelial cell migration	4/135	275/17913	0.154176	0.318866	0.243635	FBXW7/RGCC/RHOB/HSPB1	4	B1
GO:1903311	regulation of mRNA metabolic process	4/135	275/17913	0.154176	0.318866	0.243635	TENT5C/UBC/HSPB1/HSPA1A	4	B1
GO:0001822	kidney development	4/135	276/17913	0.15559	0.320737	0.245065	SDC1/BCL2/CFLAR/TMED10	4	B1
GO:0005996	monosaccharide metabolic process	4/135	277/17913	0.157009	0.323398	0.247098	PDK1/RORA/SELENOS/ATF3	4	B1
GO:0071214	cellular response to abiotic stimulus	4/135	310/17913	0.206336	0.37498	0.28651	HSPA5/RHOB/TP53INP1/CYBA	4	B1
GO:0104004	cellular response to environmental stimulus	4/135	310/17913	0.206336	0.37498	0.28651	HSPA5/RHOB/TP53INP1/CYBA	4	B1
GO:1902903	regulation of supramolecular fiber organization	4/135	313/17913	0.211032	0.377787	0.288655	LDLR/RGCC/HSPA1B/HSPA1A	4	B1
GO:0007568	aging	4/135	318/17913	0.218928	0.384323	0.293649	LMNA/JUN/RPN2/BCL2	4	B1
GO:0008202	steroid metabolic process	4/135	321/17913	0.223703	0.388586	0.296906	LDLR/HDLBP/RORA/NPC2	4	B1
GO:0071902	positive regulation of protein serine/threonine kinase activity	4/135	322/17913	0.225301	0.389967	0.297961	ERN1/DUSP5/RGCC/UBC	4	B1
GO:0043547	positive regulation of GTPase activity	4/135	339/17913	0.252896	0.411733	0.314592	JUN/ITGA6/RASGRP3/RGS1	4	B1
GO:0010948	negative regulation of cell cycle process	4/135	344/17913	0.261148	0.418458	0.31973	ATF5/FBXW7/BCL2/RGCC	4	B1
GO:0010639	negative regulation of organelle organization	4/135	352/17913	0.27446	0.430415	0.328866	LMNA/LMAN1/RGCC/HSPA1A	4	B1
GO:0045666	positive regulation of neuron differentiation	4/135	355/17913	0.279482	0.433163	0.330966	ITGA6/BCL2/CFLAR/HSPA5	4	B1
GO:0000280	nuclear division	4/135	357/17913	0.282839	0.43524	0.332553	MEI1/RGCC/HSPA1B/HSPA1A	4	B1
GO:0014706	striated muscle tissue development	4/135	376/17913	0.315003	0.45688	0.349087	LMNA/ATF3/BCL2/CFLAR	4	B1
GO:0060537	muscle tissue development	4/135	392/17913	0.342344	0.479243	0.366174	LMNA/ATF3/BCL2/CFLAR	4	B1
GO:0048285	organelle fission	4/135	395/17913	0.347483	0.483167	0.369172	MEI1/RGCC/HSPA1B/HSPA1A	4	B1
GO:0001558	regulation of cell growth	4/135	396/17913	0.349197	0.483167	0.369172	BCL2/HSPA1B/CYBA/HSPA1A	4	B1
GO:0007517	muscle organ development	4/135	403/17913	0.361195	0.491154	0.375275	ATF3/XBP1/BCL2/CFLAR	4	B1
GO:0051052	regulation of DNA metabolic process	4/135	403/17913	0.361195	0.491154	0.375275	ZBTB38/JUN/FBXW7/RGCC	4	B1
GO:0043254	regulation of protein complex assembly	4/135	409/17913	0.371477	0.496551	0.379399	JUN/HSPA1B/JCHAIN/HSPA1A	4	B1
GO:0043087	regulation of GTPase activity	4/135	410/17913	0.373189	0.498312	0.380744	JUN/ITGA6/RASGRP3/RGS1	4	B1
GO:0062012	regulation of small molecule metabolic process	4/135	439/17913	0.422616	0.535073	0.408832	LDLR/PDK1/RORA/SELENOS	4	B1
GO:0008380	RNA splicing	4/135	440/17913	0.424307	0.535379	0.409066	ERN1/AHNAK/TMBIM6/HSPA1A	4	B1
GO:0008544	epidermis development	4/135	452/17913	0.444505	0.549403	0.419781	AQP3/PERP/BCL2/PSAP	4	B1
GO:0050769	positive regulation of neurogenesis	4/135	455/17913	0.449524	0.551644	0.421493	ITGA6/BCL2/CFLAR/HSPA5	4	B1
GO:1901987	regulation of cell cycle phase transition	4/135	464/17913	0.464494	0.561812	0.429262	ATF5/FBXW7/BCL2/RGCC	4	B1
GO:0016049	cell growth	4/135	466/17913	0.467802	0.564457	0.431283	BCL2/HSPA1B/CYBA/HSPA1A	4	B1
GO:0009150	purine ribonucleotide metabolic process	4/135	500/17913	0.522817	0.60143	0.459533	PDK1/RORA/HSPA1B/HSPA1A	4	B1
GO:1901615	organic hydroxy compound metabolic process	4/135	500/17913	0.522817	0.60143	0.459533	LDLR/HDLBP/BCL2/NPC2	4	B1
GO:0036500	ATF6-mediated unfolded protein response	3/135	10/17913	4.83e-05	0.00120439	0.000920234	HSP90B1/XBP1/HSPA5	3	B1
GO:1900102	negative regulation of endoplasmic reticulum unfolded protein response	3/135	11/17913	6.61e-05	0.00161492	0.00123391	DNAJB9/HSPA5/PPP1R15A	3	B1
GO:0033033	negative regulation of myeloid cell apoptotic process	3/135	16/17913	0.000218179	0.0043294	0.00330796	SELENOS/BCL2/CCL5	3	B1
GO:0060263	regulation of respiratory burst	3/135	16/17913	0.000218179	0.0043294	0.00330796	IGHA2/JCHAIN/IGHA1	3	B1
GO:0010832	negative regulation of myotube differentiation	3/135	18/17913	0.000314429	0.00577677	0.00441384	BHLHE41/XBP1/CFLAR	3	B1
GO:0032469	endoplasmic reticulum calcium ion homeostasis	3/135	21/17913	0.000504081	0.00813315	0.00621427	BCL2/HERPUD1/TMBIM6	3	B1
GO:0045948	positive regulation of translational initiation	3/135	25/17913	0.000852726	0.0119239	0.0091107	DNAJC3/PPP1R15A/CCL5	3	B1
GO:0033032	regulation of myeloid cell apoptotic process	3/135	28/17913	0.0011947	0.0157183	0.0120098	SELENOS/BCL2/CCL5	3	B1
GO:1904292	regulation of ERAD pathway	3/135	29/17913	0.00132525	0.0171059	0.01307	DERL3/ERLEC1/HERPUD1	3	B1
GO:0033028	myeloid cell apoptotic process	3/135	32/17913	0.00176951	0.0216206	0.0165196	SELENOS/BCL2/CCL5	3	B1
GO:0034142	toll-like receptor 4 signaling pathway	3/135	34/17913	0.00211152	0.0238327	0.0182098	PELI1/TNFAIP3/NFKBIA	3	B1
GO:0000413	protein peptidyl-prolyl isomerization	3/135	35/17913	0.00229684	0.0253559	0.0193736	FKBP11/FKBP2/PPIB	3	B1
GO:0061077	chaperone-mediated protein folding	3/135	35/17913	0.00229684	0.0253559	0.0193736	PDIA4/PPIB/HSPB1	3	B1
GO:0042149	cellular response to glucose starvation	3/135	38/17913	0.00291217	0.0289334	0.0221071	XBP1/BCL2/HSPA5	3	B1
GO:0032692	negative regulation of interleukin-1 production	3/135	40/17913	0.00337349	0.0320418	0.0244821	GAS6/GSTP1/TNFAIP3	3	B1
GO:0090317	negative regulation of intracellular protein transport	3/135	41/17913	0.00361995	0.0330591	0.0252594	DERL3/ERLEC1/LMAN1	3	B1
GO:0051154	negative regulation of striated muscle cell differentiation	3/135	43/17913	0.00414518	0.0365244	0.0279071	BHLHE41/XBP1/CFLAR	3	B1
GO:0071806	protein transmembrane transport	3/135	44/17913	0.00442423	0.0378768	0.0289404	MCL1/HSPA5/SEC61G	3	B1
GO:0072604	interleukin-6 secretion	3/135	45/17913	0.0047144	0.0392919	0.0300217	GAS6/XBP1/SELENOK	3	B1
GO:0070231	T cell apoptotic process	3/135	46/17913	0.00501583	0.0405944	0.0310168	CD27/KDELR1/CCL5	3	B1
GO:1904036	negative regulation of epithelial cell apoptotic process	3/135	46/17913	0.00501583	0.0405944	0.0310168	GAS6/CFLAR/TNFAIP3	3	B1
GO:0001961	positive regulation of cytokine-mediated signaling pathway	3/135	47/17913	0.00532864	0.0423097	0.0323275	GAS6/HSPA1B/HSPA1A	3	B1
GO:0043124	negative regulation of I-kappaB kinase/NF-kappaB signaling	3/135	47/17913	0.00532864	0.0423097	0.0323275	RORA/GSTP1/TNFAIP3	3	B1
GO:0043392	negative regulation of DNA binding	3/135	48/17913	0.00565293	0.0443253	0.0338675	JUN/FBXW7/NFKBIA	3	B1
GO:0050704	regulation of interleukin-1 secretion	3/135	52/17913	0.00706712	0.0530194	0.0405104	GAS6/TNFAIP3/IGHD	3	B1
GO:0010823	negative regulation of mitochondrion organization	3/135	54/17913	0.00784582	0.0566715	0.0433008	LMNA/LMAN1/HSPA1A	3	B1
GO:0032715	negative regulation of interleukin-6 production	3/135	54/17913	0.00784582	0.0566715	0.0433008	GAS6/SELENOS/TNFAIP3	3	B1
GO:0060760	positive regulation of response to cytokine stimulus	3/135	54/17913	0.00784582	0.0566715	0.0433008	GAS6/HSPA1B/HSPA1A	3	B1
GO:0010332	response to gamma radiation	3/135	55/17913	0.00825339	0.0583533	0.0445859	BCL2/HSPA5/CYBA	3	B1
GO:0061098	positive regulation of protein tyrosine kinase activity	3/135	56/17913	0.00867321	0.0594985	0.0454609	GAS6/FBXW7/CCL5	3	B1
GO:0001836	release of cytochrome c from mitochondria	3/135	57/17913	0.00910536	0.0604702	0.0462033	LMNA/JUN/BCL2	3	B1
GO:0030888	regulation of B cell proliferation	3/135	57/17913	0.00910536	0.0604702	0.0462033	PELI1/BCL2/MZB1	3	B1
GO:0043525	positive regulation of neuron apoptotic process	3/135	57/17913	0.00910536	0.0604702	0.0462033	JUN/FBXW7/MCL1	3	B1
GO:1902041	regulation of extrinsic apoptotic signaling pathway via death domain receptors	3/135	57/17913	0.00910536	0.0604702	0.0462033	ATF3/CFLAR/TNFAIP3	3	B1
GO:2000351	regulation of endothelial cell apoptotic process	3/135	59/17913	0.0100069	0.0640903	0.0489693	GAS6/RGCC/TNFAIP3	3	B1
GO:0002260	lymphocyte homeostasis	3/135	60/17913	0.0104765	0.0664216	0.0507506	TNFRSF17/BCL2/TNFAIP3	3	B1
GO:0050701	interleukin-1 secretion	3/135	60/17913	0.0104765	0.0664216	0.0507506	GAS6/TNFAIP3/IGHD	3	B1
GO:0050766	positive regulation of phagocytosis	3/135	60/17913	0.0104765	0.0664216	0.0507506	GAS6/LMAN2/CYBA	3	B1
GO:0002637	regulation of immunoglobulin production	3/135	62/17913	0.0114535	0.069972	0.0534633	XBP1/MZB1/TMBIM6	3	B1
GO:2001244	positive regulation of intrinsic apoptotic signaling pathway	3/135	62/17913	0.0114535	0.069972	0.0534633	FBXW7/BCL2/MCL1	3	B1
GO:0030101	natural killer cell activation	3/135	63/17913	0.011961	0.0713411	0.0545094	PRDM1/SLAMF7/GAS6	3	B1
GO:0071277	cellular response to calcium ion	3/135	63/17913	0.011961	0.0713411	0.0545094	JUN/HSPA5/FOSB	3	B1
GO:0032387	negative regulation of intracellular transport	3/135	65/17913	0.0130145	0.0753044	0.0575376	DERL3/ERLEC1/LMAN1	3	B1
GO:0035924	cellular response to vascular endothelial growth factor stimulus	3/135	65/17913	0.0130145	0.0753044	0.0575376	ERN1/CD63/HSPB1	3	B1
GO:0048207	vesicle targeting, rough ER to cis-Golgi	3/135	65/17913	0.0130145	0.0753044	0.0575376	ANKRD28/LMAN1/TMED10	3	B1
GO:0048208	COPII vesicle coating	3/135	65/17913	0.0130145	0.0753044	0.0575376	ANKRD28/LMAN1/TMED10	3	B1
GO:0072577	endothelial cell apoptotic process	3/135	65/17913	0.0130145	0.0753044	0.0575376	GAS6/RGCC/TNFAIP3	3	B1
GO:0051148	negative regulation of muscle cell differentiation	3/135	66/17913	0.0135604	0.0781044	0.059677	BHLHE41/XBP1/CFLAR	3	B1
GO:0070227	lymphocyte apoptotic process	3/135	67/17913	0.0141193	0.0800412	0.0611569	CD27/KDELR1/CCL5	3	B1
GO:0032436	positive regulation of proteasomal ubiquitin-dependent protein catabolic process	3/135	68/17913	0.0146911	0.0829913	0.063411	TRIB1/HERPUD1/HSPA1A	3	B1
GO:0048662	negative regulation of smooth muscle cell proliferation	3/135	69/17913	0.0152759	0.0836818	0.0639386	TRIB1/GSTP1/TNFAIP3	3	B1
GO:0071479	cellular response to ionizing radiation	3/135	69/17913	0.0152759	0.0836818	0.0639386	HSPA5/RHOB/CYBA	3	B1
GO:1901264	carbohydrate derivative transport	3/135	69/17913	0.0152759	0.0836818	0.0639386	PSAP/NPC2/CYBA	3	B1
GO:0034381	plasma lipoprotein particle clearance	3/135	70/17913	0.0158737	0.0861077	0.0657921	LDLR/HDLBP/NPC2	3	B1
GO:0090114	COPII-coated vesicle budding	3/135	70/17913	0.0158737	0.0861077	0.0657921	ANKRD28/LMAN1/TMED10	3	B1
GO:0001960	negative regulation of cytokine-mediated signaling pathway	3/135	71/17913	0.0164845	0.0875345	0.0668823	GAS6/GSTP1/CCL5	3	B1
GO:0034121	regulation of toll-like receptor signaling pathway	3/135	71/17913	0.0164845	0.0875345	0.0668823	PELI1/TNFAIP3/CYBA	3	B1
GO:0042100	B cell proliferation	3/135	71/17913	0.0164845	0.0875345	0.0668823	PELI1/BCL2/MZB1	3	B1
GO:0070664	negative regulation of leukocyte proliferation	3/135	71/17913	0.0164845	0.0875345	0.0668823	PELI1/GSTP1/TNFAIP3	3	B1
GO:1903747	regulation of establishment of protein localization to mitochondrion	3/135	71/17913	0.0164845	0.0875345	0.0668823	LMAN1/FBXW7/BCL2	3	B1
GO:0050710	negative regulation of cytokine secretion	3/135	72/17913	0.0171083	0.0899086	0.0686963	GAS6/RGCC/TNFAIP3	3	B1
GO:0048678	response to axon injury	3/135	75/17913	0.0190584	0.0951787	0.0727229	JUN/LGALS1/BCL2	3	B1
GO:0031397	negative regulation of protein ubiquitination	3/135	76/17913	0.0197347	0.09778	0.0747105	TNFAIP3/HSPA1B/HSPA1A	3	B1
GO:0051851	modification by host of symbiont morphology or physiology	3/135	77/17913	0.0204241	0.0996269	0.0761216	JUN/PPIB/CCL5	3	B1
GO:0060761	negative regulation of response to cytokine stimulus	3/135	77/17913	0.0204241	0.0996269	0.0761216	GAS6/GSTP1/CCL5	3	B1
GO:0030512	negative regulation of transforming growth factor beta receptor signaling pathway	3/135	78/17913	0.0211267	0.101869	0.077835	HSPA5/UBC/HSPA1A	3	B1
GO:0032760	positive regulation of tumor necrosis factor production	3/135	78/17913	0.0211267	0.101869	0.077835	SELENOK/HSPB1/CYBA	3	B1
GO:0110110	positive regulation of animal organ morphogenesis	3/135	80/17913	0.0225712	0.107598	0.0822122	XBP1/CFLAR/TNFAIP3	3	B1
GO:0032755	positive regulation of interleukin-6 production	3/135	81/17913	0.0233132	0.109681	0.0838038	XBP1/SELENOK/CYBA	3	B1
GO:0051702	interaction with symbiont	3/135	81/17913	0.0233132	0.109681	0.0838038	JUN/PPIB/CCL5	3	B1
GO:1903557	positive regulation of tumor necrosis factor superfamily cytokine production	3/135	81/17913	0.0233132	0.109681	0.0838038	SELENOK/HSPB1/CYBA	3	B1
GO:0032651	regulation of interleukin-1 beta production	3/135	82/17913	0.0240684	0.111642	0.085302	GSTP1/TNFAIP3/HSPB1	3	B1
GO:0001776	leukocyte homeostasis	3/135	84/17913	0.0256182	0.116051	0.0886709	TNFRSF17/BCL2/TNFAIP3	3	B1
GO:0061097	regulation of protein tyrosine kinase activity	3/135	86/17913	0.0272205	0.120411	0.0920023	GAS6/FBXW7/CCL5	3	B1
GO:1903321	negative regulation of protein modification by small protein conjugation or removal	3/135	86/17913	0.0272205	0.120411	0.0920023	TNFAIP3/HSPA1B/HSPA1A	3	B1
GO:0072676	lymphocyte migration	3/135	87/17913	0.0280413	0.123176	0.094115	GAS6/SELENOK/CCL5	3	B1
GO:0009791	post-embryonic development	3/135	88/17913	0.0288752	0.125093	0.0955794	PRDM1/ATF5/BCL2	3	B1
GO:1904705	regulation of vascular smooth muscle cell proliferation	3/135	88/17913	0.0288752	0.125093	0.0955794	ERN1/JUN/GSTP1	3	B1
GO:1990874	vascular smooth muscle cell proliferation	3/135	88/17913	0.0288752	0.125093	0.0955794	ERN1/JUN/GSTP1	3	B1
GO:0032088	negative regulation of NF-kappaB transcription factor activity	3/135	89/17913	0.0297222	0.128321	0.0980455	PELI1/TNFAIP3/NFKBIA	3	B1
GO:0050764	regulation of phagocytosis	3/135	90/17913	0.0305823	0.130246	0.099517	GAS6/LMAN2/CYBA	3	B1
GO:0045638	negative regulation of myeloid cell differentiation	3/135	92/17913	0.0323414	0.135453	0.103495	TRIB1/FBXW7/NFKBIA	3	B1
GO:0032611	interleukin-1 beta production	3/135	93/17913	0.0332405	0.136933	0.104626	GSTP1/TNFAIP3/HSPB1	3	B1
GO:0045621	positive regulation of lymphocyte differentiation	3/135	93/17913	0.0332405	0.136933	0.104626	GAS6/CD27/XBP1	3	B1
GO:0051591	response to cAMP	3/135	93/17913	0.0332405	0.136933	0.104626	SDC1/HSPA5/FOSB	3	B1
GO:1901216	positive regulation of neuron death	3/135	93/17913	0.0332405	0.136933	0.104626	JUN/FBXW7/MCL1	3	B1
GO:0007030	Golgi organization	3/135	94/17913	0.0341525	0.140003	0.106972	LMAN1/RAB30/TMED9	3	B1
GO:0007041	lysosomal transport	3/135	94/17913	0.0341525	0.140003	0.106972	PSAP/RHOB/HSPA1A	3	B1
GO:0006641	triglyceride metabolic process	3/135	95/17913	0.0350775	0.141264	0.107935	LDLR/SEL1L/FBXW7	3	B1
GO:0033273	response to vitamin	3/135	95/17913	0.0350775	0.141264	0.107935	AQP3/GAS6/GSTP1	3	B1
GO:0045069	regulation of viral genome replication	3/135	95/17913	0.0350775	0.141264	0.107935	BCL2/PPIB/CCL5	3	B1
GO:0042116	macrophage activation	3/135	96/17913	0.0360153	0.144118	0.110116	LDLR/RORA/JUN	3	B1
GO:0010522	regulation of calcium ion transport into cytosol	3/135	98/17913	0.0379295	0.148757	0.113661	BCL2/CYBA/TMBIM6	3	B1
GO:0030301	cholesterol transport	3/135	98/17913	0.0379295	0.148757	0.113661	LDLR/NPC2/NFKBIA	3	B1
GO:0046632	alpha-beta T cell differentiation	3/135	99/17913	0.0389058	0.150655	0.115111	PRDM1/RORA/BCL2	3	B1
GO:0070301	cellular response to hydrogen peroxide	3/135	99/17913	0.0389058	0.150655	0.115111	PSAP/RHOB/TNFAIP3	3	B1
GO:0070498	interleukin-1-mediated signaling pathway	3/135	101/17913	0.0408966	0.156916	0.119894	PELI1/UBC/NFKBIA	3	B1
GO:0006275	regulation of DNA replication	3/135	102/17913	0.041911	0.159351	0.121755	ZBTB38/JUN/FBXW7	3	B1
GO:0007034	vacuolar transport	3/135	103/17913	0.0429381	0.162461	0.124131	PSAP/RHOB/HSPA1A	3	B1
GO:0043279	response to alkaloid	3/135	106/17913	0.0460945	0.172136	0.131524	HSPA5/FOSB/TMED10	3	B1
GO:0001938	positive regulation of endothelial cell proliferation	3/135	107/17913	0.0471715	0.174348	0.133213	JUN/MYDGF/CYBA	3	B1
GO:0015918	sterol transport	3/135	107/17913	0.0471715	0.174348	0.133213	LDLR/NPC2/NFKBIA	3	B1
GO:0022037	metencephalon development	3/135	107/17913	0.0471715	0.174348	0.133213	RORA/BCL2/HSPA5	3	B1
GO:0045047	protein targeting to ER	3/135	108/17913	0.0482609	0.177852	0.135891	SSR3/HSPA5/SEC61G	3	B1
GO:0031398	positive regulation of protein ubiquitination	3/135	110/17913	0.0504767	0.183598	0.140281	PELI1/FBXW7/HSPA5	3	B1
GO:0032434	regulation of proteasomal ubiquitin-dependent protein catabolic process	3/135	110/17913	0.0504767	0.183598	0.140281	TRIB1/HERPUD1/HSPA1A	3	B1
GO:0072599	establishment of protein localization to endoplasmic reticulum	3/135	112/17913	0.0527414	0.189372	0.144693	SSR3/HSPA5/SEC61G	3	B1
GO:0006639	acylglycerol metabolic process	3/135	113/17913	0.0538919	0.192133	0.146803	LDLR/SEL1L/FBXW7	3	B1
GO:0010906	regulation of glucose metabolic process	3/135	113/17913	0.0538919	0.192133	0.146803	PDK1/RORA/SELENOS	3	B1
GO:0051817	modification of morphology or physiology of other organism involved in symbiotic interaction	3/135	113/17913	0.0538919	0.192133	0.146803	JUN/PPIB/CCL5	3	B1
GO:0006638	neutral lipid metabolic process	3/135	114/17913	0.0550544	0.194897	0.148915	LDLR/SEL1L/FBXW7	3	B1
GO:0002761	regulation of myeloid leukocyte differentiation	3/135	117/17913	0.0586137	0.203491	0.155481	TRIB1/JUN/FBXW7	3	B1
GO:0045727	positive regulation of translation	3/135	117/17913	0.0586137	0.203491	0.155481	DNAJC3/PPP1R15A/CCL5	3	B1
GO:0051101	regulation of DNA binding	3/135	120/17913	0.0622792	0.214735	0.164072	JUN/FBXW7/NFKBIA	3	B1
GO:0002687	positive regulation of leukocyte migration	3/135	121/17913	0.0635244	0.216948	0.165763	GAS6/SELENOK/CCL5	3	B1
GO:0043500	muscle adaptation	3/135	121/17913	0.0635244	0.216948	0.165763	LMNA/CFLAR/CYBA	3	B1
GO:0072655	establishment of protein localization to mitochondrion	3/135	121/17913	0.0635244	0.216948	0.165763	LMAN1/FBXW7/BCL2	3	B1
GO:0090101	negative regulation of transmembrane receptor protein serine/threonine kinase signaling pathway	3/135	121/17913	0.0635244	0.216948	0.165763	HSPA5/UBC/HSPA1A	3	B1
GO:1903409	reactive oxygen species biosynthetic process	3/135	122/17913	0.064781	0.21917	0.167461	RORA/CFLAR/CYBA	3	B1
GO:0070585	protein localization to mitochondrion	3/135	125/17913	0.0686195	0.228421	0.174529	LMAN1/FBXW7/BCL2	3	B1
GO:0045471	response to ethanol	3/135	127/17913	0.0712349	0.230095	0.175808	CD27/GSTP1/TP53INP1	3	B1
GO:1903322	positive regulation of protein modification by small protein conjugation or removal	3/135	128/17913	0.0725592	0.230095	0.175808	PELI1/FBXW7/HSPA5	3	B1
GO:0050921	positive regulation of chemotaxis	3/135	130/17913	0.075241	0.235257	0.179752	GAS6/HSPB1/CCL5	3	B1
GO:0046631	alpha-beta T cell activation	3/135	133/17913	0.0793452	0.237061	0.18113	PRDM1/RORA/BCL2	3	B1
GO:0071901	negative regulation of protein serine/threonine kinase activity	3/135	136/17913	0.0835453	0.247075	0.188782	GSTP1/TNFAIP3/HSPB1	3	B1
GO:0002700	regulation of production of molecular mediator of immune response	3/135	138/17913	0.0863976	0.248005	0.189492	XBP1/MZB1/TMBIM6	3	B1
GO:0010675	regulation of cellular carbohydrate metabolic process	3/135	138/17913	0.0863976	0.248005	0.189492	PDK1/RORA/SELENOS	3	B1
GO:0045580	regulation of T cell differentiation	3/135	139/17913	0.0878392	0.250387	0.191312	PRDM1/CD27/XBP1	3	B1
GO:0034250	positive regulation of cellular amide metabolic process	3/135	140/17913	0.089291	0.252523	0.192945	DNAJC3/PPP1R15A/CCL5	3	B1
GO:0008203	cholesterol metabolic process	3/135	143/17913	0.0937066	0.254983	0.194824	LDLR/HDLBP/NPC2	3	B1
GO:0060402	calcium ion transport into cytosol	3/135	145/17913	0.0966997	0.261713	0.199966	BCL2/CYBA/TMBIM6	3	B1
GO:0000187	activation of MAPK activity	3/135	147/17913	0.0997316	0.263849	0.201598	ERN1/DUSP5/UBC	3	B1
GO:1902652	secondary alcohol metabolic process	3/135	147/17913	0.0997316	0.263849	0.201598	LDLR/HDLBP/NPC2	3	B1
GO:0042129	regulation of T cell proliferation	3/135	149/17913	0.102802	0.268834	0.205407	PELI1/SELENOK/CCL5	3	B1
GO:0007088	regulation of mitotic nuclear division	3/135	150/17913	0.104351	0.268834	0.205407	RGCC/HSPA1B/HSPA1A	3	B1
GO:1903707	negative regulation of hemopoiesis	3/135	152/17913	0.107477	0.268905	0.205462	TRIB1/FBXW7/NFKBIA	3	B1
GO:0050729	positive regulation of inflammatory response	3/135	153/17913	0.109053	0.272308	0.208062	LDLR/NEAT1/NFKBIA	3	B1
GO:0016125	sterol metabolic process	3/135	155/17913	0.112233	0.276545	0.211299	LDLR/HDLBP/NPC2	3	B1
GO:0007519	skeletal muscle tissue development	3/135	156/17913	0.113837	0.276545	0.211299	ATF3/BCL2/CFLAR	3	B1
GO:0060401	cytosolic calcium ion transport	3/135	157/17913	0.115449	0.279408	0.213487	BCL2/CYBA/TMBIM6	3	B1
GO:0002285	lymphocyte activation involved in immune response	3/135	158/17913	0.11707	0.282516	0.215861	RORA/LGALS1/XBP1	3	B1
GO:0009408	response to heat	3/135	158/17913	0.11707	0.282516	0.215861	TP53INP1/HSPA1B/HSPA1A	3	B1
GO:0043535	regulation of blood vessel endothelial cell migration	3/135	158/17913	0.11707	0.282516	0.215861	FBXW7/RGCC/HSPB1	3	B1
GO:0035821	modification of morphology or physiology of other organism	3/135	160/17913	0.120337	0.286674	0.219039	JUN/PPIB/CCL5	3	B1
GO:0002695	negative regulation of leukocyte activation	3/135	163/17913	0.1253	0.294199	0.224788	LDLR/PELI1/TNFAIP3	3	B1
GO:0071466	cellular response to xenobiotic stimulus	3/135	164/17913	0.126971	0.294641	0.225126	RORA/CFLAR/GSTP1	3	B1
GO:0060538	skeletal muscle organ development	3/135	165/17913	0.12865	0.297349	0.227194	ATF3/BCL2/CFLAR	3	B1
GO:0030308	negative regulation of cell growth	3/135	167/17913	0.132032	0.298618	0.228164	BCL2/HSPA1B/HSPA1A	3	B1
GO:0071248	cellular response to metal ion	3/135	167/17913	0.132032	0.298618	0.228164	JUN/HSPA5/FOSB	3	B1
GO:0046328	regulation of JNK cascade	3/135	169/17913	0.135445	0.300895	0.229904	ERN1/CD27/GSTP1	3	B1
GO:0070507	regulation of microtubule cytoskeleton organization	3/135	170/17913	0.137163	0.303548	0.231931	ATF5/HSPA1B/HSPA1A	3	B1
GO:0043123	positive regulation of I-kappaB kinase/NF-kappaB signaling	3/135	172/17913	0.140621	0.30486	0.232934	PELI1/LGALS1/CFLAR	3	B1
GO:0051783	regulation of nuclear division	3/135	172/17913	0.140621	0.30486	0.232934	RGCC/HSPA1B/HSPA1A	3	B1
GO:0010634	positive regulation of epithelial cell migration	3/135	173/17913	0.142361	0.307838	0.235209	JUN/RHOB/HSPB1	3	B1
GO:1901136	carbohydrate derivative catabolic process	3/135	176/17913	0.147625	0.312245	0.238576	SDC1/TYMP/PSAP	3	B1
GO:0042098	T cell proliferation	3/135	177/17913	0.149393	0.315456	0.24103	PELI1/SELENOK/CCL5	3	B1
GO:0006575	cellular modified amino acid metabolic process	3/135	179/17913	0.152951	0.317785	0.242809	PRDX4/P4HB/GSTP1	3	B1
GO:0043534	blood vessel endothelial cell migration	3/135	182/17913	0.158338	0.323823	0.247422	FBXW7/RGCC/HSPB1	3	B1
GO:0050731	positive regulation of peptidyl-tyrosine phosphorylation	3/135	184/17913	0.161962	0.327174	0.249983	GAS6/FBXW7/CCL5	3	B1
GO:1902115	regulation of organelle assembly	3/135	185/17913	0.163784	0.329768	0.251965	SDC1/HSPA1B/HSPA1A	3	B1
GO:1902905	positive regulation of supramolecular fiber organization	3/135	185/17913	0.163784	0.329768	0.251965	RGCC/HSPA1B/HSPA1A	3	B1
GO:0002685	regulation of leukocyte migration	3/135	186/17913	0.165611	0.329768	0.251965	GAS6/SELENOK/CCL5	3	B1
GO:0050866	negative regulation of cell activation	3/135	187/17913	0.167445	0.332119	0.253761	LDLR/PELI1/TNFAIP3	3	B1
GO:0044272	sulfur compound biosynthetic process	3/135	190/17913	0.172982	0.337516	0.257885	CHPF/PDK1/GSTP1	3	B1
GO:1901654	response to ketone	3/135	191/17913	0.174839	0.340348	0.260049	CFLAR/FOSB/CYBA	3	B1
GO:1902806	regulation of cell cycle G1/S phase transition	3/135	195/17913	0.182324	0.347133	0.265233	FBXW7/BCL2/RGCC	3	B1
GO:0006109	regulation of carbohydrate metabolic process	3/135	198/17913	0.187994	0.354708	0.271021	PDK1/RORA/SELENOS	3	B1
GO:0071229	cellular response to acid chemical	3/135	199/17913	0.189894	0.355354	0.271515	LDLR/XBP1/CYBA	3	B1
GO:0002573	myeloid leukocyte differentiation	3/135	201/17913	0.19371	0.359563	0.27473	TRIB1/JUN/FBXW7	3	B1
GO:0010810	regulation of cell-substrate adhesion	3/135	201/17913	0.19371	0.359563	0.27473	LGALS1/ITGA6/BCL2	3	B1
GO:0051495	positive regulation of cytoskeleton organization	3/135	205/17913	0.201397	0.369743	0.282508	RGCC/HSPA1B/HSPA1A	3	B1
GO:0007160	cell-matrix adhesion	3/135	214/17913	0.218949	0.384323	0.293649	ITGA6/BCL2/CD63	3	B1
GO:0034329	cell junction assembly	3/135	214/17913	0.218949	0.384323	0.293649	ITGA6/BCL2/VMP1	3	B1
GO:0032872	regulation of stress-activated MAPK cascade	3/135	220/17913	0.230823	0.394609	0.301508	ERN1/CD27/GSTP1	3	B1
GO:0070302	regulation of stress-activated protein kinase signaling cascade	3/135	222/17913	0.234808	0.397185	0.303476	ERN1/CD27/GSTP1	3	B1
GO:0018105	peptidyl-serine phosphorylation	3/135	231/17913	0.252885	0.411733	0.314592	ERN1/GAS6/BCL2	3	B1
GO:0140014	mitotic nuclear division	3/135	237/17913	0.265049	0.421209	0.321832	RGCC/HSPA1B/HSPA1A	3	B1
GO:0007281	germ cell development	3/135	238/17913	0.267084	0.421209	0.321832	PRDM1/MEI1/BCL2	3	B1
GO:0045165	cell fate commitment	3/135	238/17913	0.267084	0.421209	0.321832	RORA/BCL2/MCL1	3	B1
GO:0061448	connective tissue development	3/135	243/17913	0.277285	0.431604	0.329774	SELENOM/XBP1/CFLAR	3	B1
GO:0071383	cellular response to steroid hormone stimulus	3/135	243/17913	0.277285	0.431604	0.329774	RORA/CFLAR/GSTP1	3	B1
GO:0045926	negative regulation of growth	3/135	244/17913	0.27933	0.433163	0.330966	BCL2/HSPA1B/HSPA1A	3	B1
GO:0050730	regulation of peptidyl-tyrosine phosphorylation	3/135	245/17913	0.281377	0.43524	0.332553	GAS6/FBXW7/CCL5	3	B1
GO:0003007	heart morphogenesis	3/135	249/17913	0.289577	0.439341	0.335686	JUN/CITED2/DNAAF1	3	B1
GO:0043406	positive regulation of MAP kinase activity	3/135	250/17913	0.291631	0.441923	0.337659	ERN1/DUSP5/UBC	3	B1
GO:0018209	peptidyl-serine modification	3/135	252/17913	0.29574	0.443429	0.33881	ERN1/GAS6/BCL2	3	B1
GO:1901988	negative regulation of cell cycle phase transition	3/135	254/17913	0.299854	0.446059	0.340819	ATF5/BCL2/RGCC	3	B1
GO:0007204	positive regulation of cytosolic calcium ion concentration	3/135	255/17913	0.301912	0.44859	0.342753	BCL2/CYBA/TMBIM6	3	B1
GO:0044262	cellular carbohydrate metabolic process	3/135	256/17913	0.30397	0.450003	0.343833	PDK1/RORA/SELENOS	3	B1
GO:0060485	mesenchyme development	3/135	258/17913	0.30809	0.453502	0.346506	BCL2/CITED2/RGCC	3	B1
GO:0006260	DNA replication	3/135	260/17913	0.312212	0.456351	0.348683	ZBTB38/JUN/FBXW7	3	B1
GO:0021700	developmental maturation	3/135	262/17913	0.316335	0.458122	0.350036	XBP1/BCL2/CD63	3	B1
GO:0010976	positive regulation of neuron projection development	3/135	265/17913	0.322523	0.463086	0.353829	ITGA6/CFLAR/HSPA5	3	B1
GO:0045927	positive regulation of growth	3/135	266/17913	0.324586	0.464335	0.354783	BCL2/PPIB/CYBA	3	B1
GO:0043491	protein kinase B signaling	3/135	268/17913	0.328712	0.467893	0.357502	GAS6/MYDGF/CCL5	3	B1
GO:0007162	negative regulation of cell adhesion	3/135	271/17913	0.3349	0.472924	0.361346	PELI1/LGALS1/RGCC	3	B1
GO:0050768	negative regulation of neurogenesis	3/135	271/17913	0.3349	0.472924	0.361346	LDLR/LGALS1/ITM2C	3	B1
GO:0034330	cell junction organization	3/135	277/17913	0.34727	0.483167	0.369172	ITGA6/BCL2/VMP1	3	B1
GO:0090150	establishment of protein localization to membrane	3/135	287/17913	0.367837	0.495013	0.378224	SSR3/BCL2/HSPA5	3	B1
GO:0044843	cell cycle G1/S phase transition	3/135	288/17913	0.369888	0.495013	0.378224	FBXW7/BCL2/RGCC	3	B1
GO:0051480	regulation of cytosolic calcium ion concentration	3/135	289/17913	0.371939	0.496906	0.379669	BCL2/CYBA/TMBIM6	3	B1
GO:0051961	negative regulation of nervous system development	3/135	290/17913	0.373988	0.499114	0.381356	LDLR/LGALS1/ITM2C	3	B1
GO:0070588	calcium ion transmembrane transport	3/135	293/17913	0.380129	0.502512	0.383953	GAS6/AHNAK/CYBA	3	B1
GO:0030216	keratinocyte differentiation	3/135	298/17913	0.390334	0.511172	0.39057	AQP3/PERP/PSAP	3	B1
GO:0046879	hormone secretion	3/135	301/17913	0.396439	0.514747	0.393301	SELENOM/PHPT1/CCL5	3	B1
GO:0006913	nucleocytoplasmic transport	3/135	302/17913	0.398471	0.514862	0.393389	LMNA/GAS6/NFKBIA	3	B1
GO:0051169	nuclear transport	3/135	305/17913	0.404554	0.520318	0.397558	LMNA/GAS6/NFKBIA	3	B1
GO:0009914	hormone transport	3/135	311/17913	0.416668	0.531284	0.405937	SELENOM/PHPT1/CCL5	3	B1
GO:1904062	regulation of cation transmembrane transport	3/135	312/17913	0.41868	0.532902	0.407173	AHNAK/CD63/CYBA	3	B1
GO:0060562	epithelial tube morphogenesis	3/135	313/17913	0.42069	0.532902	0.407173	BCL2/DNAAF1/RHOB	3	B1
GO:1903829	positive regulation of cellular protein localization	3/135	318/17913	0.430703	0.539774	0.412424	GAS6/FBXW7/BCL2	3	B1
GO:0007265	Ras protein signal transduction	3/135	324/17913	0.442637	0.548827	0.419341	JUN/RASGRP3/RHOB	3	B1
GO:0007015	actin filament organization	3/135	325/17913	0.444617	0.549403	0.419781	HSP90B1/BCL2/RGCC	3	B1
GO:0022412	cellular process involved in reproduction in multicellular organism	3/135	326/17913	0.446595	0.549403	0.419781	PRDM1/MEI1/BCL2	3	B1
GO:0007596	blood coagulation	3/135	331/17913	0.45644	0.556888	0.4255	GAS6/LMAN1/HSPB1	3	B1
GO:0007599	hemostasis	3/135	336/17913	0.466213	0.56362	0.430644	GAS6/LMAN1/HSPB1	3	B1
GO:0050817	coagulation	3/135	337/17913	0.468158	0.564616	0.431405	GAS6/LMAN1/HSPB1	3	B1
GO:0006066	alcohol metabolic process	3/135	339/17913	0.47204	0.566583	0.432908	LDLR/HDLBP/NPC2	3	B1
GO:0006631	fatty acid metabolic process	3/135	339/17913	0.47204	0.566583	0.432908	PDK1/XBP1/GSTP1	3	B1
GO:0001654	eye development	3/135	342/17913	0.477839	0.570551	0.435939	PRDM1/JUN/BCL2	3	B1
GO:0006790	sulfur compound metabolic process	3/135	346/17913	0.485526	0.575672	0.439852	CHPF/PDK1/GSTP1	3	B1
GO:0009913	epidermal cell differentiation	3/135	346/17913	0.485526	0.575672	0.439852	AQP3/PERP/PSAP	3	B1
GO:0018108	peptidyl-tyrosine phosphorylation	3/135	346/17913	0.485526	0.575672	0.439852	GAS6/FBXW7/CCL5	3	B1
GO:0150063	visual system development	3/135	346/17913	0.485526	0.575672	0.439852	PRDM1/JUN/BCL2	3	B1
GO:0018212	peptidyl-tyrosine modification	3/135	349/17913	0.491256	0.580239	0.443342	GAS6/FBXW7/CCL5	3	B1
GO:0048880	sensory system development	3/135	351/17913	0.495059	0.582817	0.445311	PRDM1/JUN/BCL2	3	B1
GO:0031346	positive regulation of cell projection organization	3/135	362/17913	0.515721	0.596539	0.455796	ITGA6/CFLAR/HSPA5	3	B1
GO:0045787	positive regulation of cell cycle	3/135	373/17913	0.535932	0.610657	0.466583	CCPG1/CITED2/RGCC	3	B1
GO:0046486	glycerolipid metabolic process	3/135	385/17913	0.557434	0.628612	0.480302	LDLR/SEL1L/FBXW7	3	B1
GO:0001503	ossification	3/135	388/17913	0.562717	0.631176	0.482261	RRBP1/BCL2/TPM4	3	B1
GO:0048568	embryonic organ development	3/135	413/17913	0.605242	0.66321	0.506738	PRDM1/CITED2/DNAAF1	3	B1
GO:0015711	organic anion transport	3/135	430/17913	0.632573	0.684926	0.523329	LDLR/PSAP/NPC2	3	B1
GO:0023061	signal release	3/135	433/17913	0.63726	0.6887	0.526213	SELENOM/PHPT1/CCL5	3	B1
GO:0034765	regulation of ion transmembrane transport	3/135	453/17913	0.667444	0.711694	0.543783	AHNAK/CD63/CYBA	3	B1
GO:0007264	small GTPase mediated signal transduction	3/135	465/17913	0.684667	0.725207	0.554107	JUN/RASGRP3/RHOB	3	B1
GO:0021924	cell proliferation in external granule layer	2/135	10/17913	0.00243855	0.0255089	0.0194906	RORA/ATF5	2	B1
GO:0021930	cerebellar granule cell precursor proliferation	2/135	10/17913	0.00243855	0.0255089	0.0194906	RORA/ATF5	2	B1
GO:0032823	regulation of natural killer cell differentiation	2/135	10/17913	0.00243855	0.0255089	0.0194906	PRDM1/GAS6	2	B1
GO:0034135	regulation of toll-like receptor 2 signaling pathway	2/135	10/17913	0.00243855	0.0255089	0.0194906	TNFAIP3/CYBA	2	B1
GO:0070862	negative regulation of protein exit from endoplasmic reticulum	2/135	10/17913	0.00243855	0.0255089	0.0194906	DERL3/ERLEC1	2	B1
GO:1903265	positive regulation of tumor necrosis factor-mediated signaling pathway	2/135	10/17913	0.00243855	0.0255089	0.0194906	HSPA1B/HSPA1A	2	B1
GO:1903897	regulation of PERK-mediated unfolded protein response	2/135	10/17913	0.00243855	0.0255089	0.0194906	HSPA5/PPP1R15A	2	B1
GO:2000109	regulation of macrophage apoptotic process	2/135	10/17913	0.00243855	0.0255089	0.0194906	SELENOS/CCL5	2	B1
GO:0003093	regulation of glomerular filtration	2/135	11/17913	0.00296576	0.0289334	0.0221071	GAS6/CYBA	2	B1
GO:0019471	4-hydroxyproline metabolic process	2/135	11/17913	0.00296576	0.0289334	0.0221071	PRDX4/P4HB	2	B1
GO:0021534	cell proliferation in hindbrain	2/135	11/17913	0.00296576	0.0289334	0.0221071	RORA/ATF5	2	B1
GO:0090084	negative regulation of inclusion body assembly	2/135	11/17913	0.00296576	0.0289334	0.0221071	HSPA1B/HSPA1A	2	B1
GO:1990440	positive regulation of transcription from RNA polymerase II promoter in response to endoplasmic reticulum stress	2/135	11/17913	0.00296576	0.0289334	0.0221071	ATF3/HSPA5	2	B1
GO:0002674	negative regulation of acute inflammatory response	2/135	12/17913	0.00354139	0.0326509	0.0249475	SELENOS/GSTP1	2	B1
GO:0006983	ER overload response	2/135	12/17913	0.00354139	0.0326509	0.0249475	SELENOS/HSPA5	2	B1
GO:0043922	negative regulation by host of viral transcription	2/135	12/17913	0.00354139	0.0326509	0.0249475	JUN/CCL5	2	B1
GO:0045579	positive regulation of B cell differentiation	2/135	12/17913	0.00354139	0.0326509	0.0249475	CD27/XBP1	2	B1
GO:0071888	macrophage apoptotic process	2/135	12/17913	0.00354139	0.0326509	0.0249475	SELENOS/CCL5	2	B1
GO:1903894	regulation of IRE1-mediated unfolded protein response	2/135	12/17913	0.00354139	0.0326509	0.0249475	DNAJB9/HSPA5	2	B1
GO:0031665	negative regulation of lipopolysaccharide-mediated signaling pathway	2/135	13/17913	0.00416468	0.0365244	0.0279071	TRIB1/TNFAIP3	2	B1
GO:1900103	positive regulation of endoplasmic reticulum unfolded protein response	2/135	13/17913	0.00416468	0.0365244	0.0279071	ERN1/XBP1	2	B1
GO:1904293	negative regulation of ERAD pathway	2/135	13/17913	0.00416468	0.0365244	0.0279071	DERL3/ERLEC1	2	B1
GO:0043558	regulation of translational initiation in response to stress	2/135	14/17913	0.0048349	0.0397694	0.0303865	DNAJC3/PPP1R15A	2	B1
GO:0061042	vascular wound healing	2/135	14/17913	0.0048349	0.0397694	0.0303865	XBP1/TNFAIP3	2	B1
GO:1904152	regulation of retrograde protein transport, ER to cytosol	2/135	14/17913	0.0048349	0.0397694	0.0303865	DERL3/ERLEC1	2	B1
GO:0034134	toll-like receptor 2 signaling pathway	2/135	15/17913	0.00555131	0.0436645	0.0333626	TNFAIP3/CYBA	2	B1
GO:0001977	renal system process involved in regulation of blood volume	2/135	16/17913	0.00631318	0.0485941	0.0371292	GAS6/CYBA	2	B1
GO:0070293	renal absorption	2/135	16/17913	0.00631318	0.0485941	0.0371292	AQP3/GAS6	2	B1
GO:0071605	monocyte chemotactic protein-1 production	2/135	16/17913	0.00631318	0.0485941	0.0371292	GSTP1/SELENOK	2	B1
GO:0071637	regulation of monocyte chemotactic protein-1 production	2/135	16/17913	0.00631318	0.0485941	0.0371292	GSTP1/SELENOK	2	B1
GO:0090083	regulation of inclusion body assembly	2/135	16/17913	0.00631318	0.0485941	0.0371292	HSPA1B/HSPA1A	2	B1
GO:0032930	positive regulation of superoxide anion generation	2/135	17/17913	0.00711981	0.0530194	0.0405104	GSTP1/CYBA	2	B1
GO:0034384	high-density lipoprotein particle clearance	2/135	17/17913	0.00711981	0.0530194	0.0405104	LDLR/HDLBP	2	B1
GO:0050711	negative regulation of interleukin-1 secretion	2/135	17/17913	0.00711981	0.0530194	0.0405104	GAS6/TNFAIP3	2	B1
GO:0070233	negative regulation of T cell apoptotic process	2/135	17/17913	0.00711981	0.0530194	0.0405104	CD27/CCL5	2	B1
GO:1903209	positive regulation of oxidative stress-induced cell death	2/135	17/17913	0.00711981	0.0530194	0.0405104	FBXW7/MCL1	2	B1
GO:2000811	negative regulation of anoikis	2/135	17/17913	0.00711981	0.0530194	0.0405104	BCL2/MCL1	2	B1
GO:0001779	natural killer cell differentiation	2/135	18/17913	0.00797048	0.0566715	0.0433008	PRDM1/GAS6	2	B1
GO:0035994	response to muscle stretch	2/135	18/17913	0.00797048	0.0566715	0.0433008	JUN/NFKBIA	2	B1
GO:0042026	protein refolding	2/135	18/17913	0.00797048	0.0566715	0.0433008	HSPA1B/HSPA1A	2	B1
GO:0043555	regulation of translation in response to stress	2/135	18/17913	0.00797048	0.0566715	0.0433008	DNAJC3/PPP1R15A	2	B1
GO:0051023	regulation of immunoglobulin secretion	2/135	18/17913	0.00797048	0.0566715	0.0433008	XBP1/TMBIM6	2	B1
GO:0060546	negative regulation of necroptotic process	2/135	18/17913	0.00797048	0.0566715	0.0433008	PELI1/CFLAR	2	B1
GO:0002313	mature B cell differentiation involved in immune response	2/135	19/17913	0.0088645	0.0594985	0.0454609	LGALS1/XBP1	2	B1
GO:0002544	chronic inflammatory response	2/135	19/17913	0.0088645	0.0594985	0.0454609	TNFAIP3/CCL5	2	B1
GO:0010523	negative regulation of calcium ion transport into cytosol	2/135	19/17913	0.0088645	0.0594985	0.0454609	BCL2/TMBIM6	2	B1
GO:0032069	regulation of nuclease activity	2/135	19/17913	0.0088645	0.0594985	0.0454609	TMBIM6/HSPA1A	2	B1
GO:0032495	response to muramyl dipeptide	2/135	19/17913	0.0088645	0.0594985	0.0454609	TNFAIP3/NFKBIA	2	B1
GO:0034138	toll-like receptor 3 signaling pathway	2/135	19/17913	0.0088645	0.0594985	0.0454609	PELI1/TNFAIP3	2	B1
GO:0051767	nitric-oxide synthase biosynthetic process	2/135	19/17913	0.0088645	0.0594985	0.0454609	SELENOS/GSTP1	2	B1
GO:0051769	regulation of nitric-oxide synthase biosynthetic process	2/135	19/17913	0.0088645	0.0594985	0.0454609	SELENOS/GSTP1	2	B1
GO:1900409	positive regulation of cellular response to oxidative stress	2/135	19/17913	0.0088645	0.0594985	0.0454609	FBXW7/MCL1	2	B1
GO:0007020	microtubule nucleation	2/135	20/17913	0.00980117	0.0632552	0.0483313	HSPA1B/HSPA1A	2	B1
GO:0034143	regulation of toll-like receptor 4 signaling pathway	2/135	20/17913	0.00980117	0.0632552	0.0483313	PELI1/TNFAIP3	2	B1
GO:0060972	left/right pattern formation	2/135	20/17913	0.00980117	0.0632552	0.0483313	CITED2/DNAAF1	2	B1
GO:1901673	regulation of mitotic spindle assembly	2/135	20/17913	0.00980117	0.0632552	0.0483313	HSPA1B/HSPA1A	2	B1
GO:0006925	inflammatory cell apoptotic process	2/135	21/17913	0.0107798	0.0669945	0.0511883	SELENOS/CCL5	2	B1
GO:0032928	regulation of superoxide anion generation	2/135	21/17913	0.0107798	0.0669945	0.0511883	GSTP1/CYBA	2	B1
GO:0097186	amelogenesis	2/135	21/17913	0.0107798	0.0669945	0.0511883	PERP/ITGA6	2	B1
GO:1902884	positive regulation of response to oxidative stress	2/135	21/17913	0.0107798	0.0669945	0.0511883	FBXW7/MCL1	2	B1
GO:1903055	positive regulation of extracellular matrix organization	2/135	21/17913	0.0107798	0.0669945	0.0511883	RGCC/CFLAR	2	B1
GO:0010866	regulation of triglyceride biosynthetic process	2/135	22/17913	0.0117997	0.0707142	0.0540304	LDLR/FBXW7	2	B1
GO:0032366	intracellular sterol transport	2/135	22/17913	0.0117997	0.0707142	0.0540304	LDLR/NPC2	2	B1
GO:0032367	intracellular cholesterol transport	2/135	22/17913	0.0117997	0.0707142	0.0540304	LDLR/NPC2	2	B1
GO:0043496	regulation of protein homodimerization activity	2/135	22/17913	0.0117997	0.0707142	0.0540304	BCL2/HSPA5	2	B1
GO:0048305	immunoglobulin secretion	2/135	22/17913	0.0117997	0.0707142	0.0540304	XBP1/TMBIM6	2	B1
GO:0060547	negative regulation of necrotic cell death	2/135	22/17913	0.0117997	0.0707142	0.0540304	PELI1/CFLAR	2	B1
GO:0034123	positive regulation of toll-like receptor signaling pathway	2/135	23/17913	0.0128603	0.0753044	0.0575376	PELI1/CYBA	2	B1
GO:0060055	angiogenesis involved in wound healing	2/135	23/17913	0.0128603	0.0753044	0.0575376	XBP1/TNFAIP3	2	B1
GO:0070841	inclusion body assembly	2/135	23/17913	0.0128603	0.0753044	0.0575376	HSPA1B/HSPA1A	2	B1
GO:0002407	dendritic cell chemotaxis	2/135	24/17913	0.0139608	0.0793215	0.060607	GAS6/CCL5	2	B1
GO:0010804	negative regulation of tumor necrosis factor-mediated signaling pathway	2/135	24/17913	0.0139608	0.0793215	0.060607	GAS6/GSTP1	2	B1
GO:0021680	cerebellar Purkinje cell layer development	2/135	24/17913	0.0139608	0.0793215	0.060607	RORA/HSPA5	2	B1
GO:0032897	negative regulation of viral transcription	2/135	24/17913	0.0139608	0.0793215	0.060607	JUN/CCL5	2	B1
GO:0036003	positive regulation of transcription from RNA polymerase II promoter in response to stress	2/135	24/17913	0.0139608	0.0793215	0.060607	ATF3/HSPA5	2	B1
GO:2000209	regulation of anoikis	2/135	24/17913	0.0139608	0.0793215	0.060607	BCL2/MCL1	2	B1
GO:0002335	mature B cell differentiation	2/135	25/17913	0.0151007	0.0836818	0.0639386	LGALS1/XBP1	2	B1
GO:0003071	renal system process involved in regulation of systemic arterial blood pressure	2/135	25/17913	0.0151007	0.0836818	0.0639386	GAS6/CYBA	2	B1
GO:0031664	regulation of lipopolysaccharide-mediated signaling pathway	2/135	25/17913	0.0151007	0.0836818	0.0639386	TRIB1/TNFAIP3	2	B1
GO:0034110	regulation of homotypic cell-cell adhesion	2/135	25/17913	0.0151007	0.0836818	0.0639386	LGALS1/CCL5	2	B1
GO:0070861	regulation of protein exit from endoplasmic reticulum	2/135	25/17913	0.0151007	0.0836818	0.0639386	DERL3/ERLEC1	2	B1
GO:1903203	regulation of oxidative stress-induced neuron death	2/135	26/17913	0.0162792	0.0875345	0.0668823	FBXW7/MCL1	2	B1
GO:0001782	B cell homeostasis	2/135	27/17913	0.0174957	0.0902391	0.0689487	BCL2/TNFAIP3	2	B1
GO:0036336	dendritic cell migration	2/135	27/17913	0.0174957	0.0902391	0.0689487	GAS6/CCL5	2	B1
GO:0036475	neuron death in response to oxidative stress	2/135	27/17913	0.0174957	0.0902391	0.0689487	FBXW7/MCL1	2	B1
GO:0043921	modulation by host of viral transcription	2/135	27/17913	0.0174957	0.0902391	0.0689487	JUN/CCL5	2	B1
GO:0052472	modulation by host of symbiont transcription	2/135	27/17913	0.0174957	0.0902391	0.0689487	JUN/CCL5	2	B1
GO:0060544	regulation of necroptotic process	2/135	27/17913	0.0174957	0.0902391	0.0689487	PELI1/CFLAR	2	B1
GO:0090169	regulation of spindle assembly	2/135	27/17913	0.0174957	0.0902391	0.0689487	HSPA1B/HSPA1A	2	B1
GO:0031116	positive regulation of microtubule polymerization	2/135	28/17913	0.0187496	0.0938226	0.0716868	HSPA1B/HSPA1A	2	B1
GO:0032814	regulation of natural killer cell activation	2/135	28/17913	0.0187496	0.0938226	0.0716868	PRDM1/GAS6	2	B1
GO:0045577	regulation of B cell differentiation	2/135	28/17913	0.0187496	0.0938226	0.0716868	CD27/XBP1	2	B1
GO:0052312	modulation of transcription in other organism involved in symbiotic interaction	2/135	28/17913	0.0187496	0.0938226	0.0716868	JUN/CCL5	2	B1
GO:0070229	negative regulation of lymphocyte apoptotic process	2/135	28/17913	0.0187496	0.0938226	0.0716868	CD27/CCL5	2	B1
GO:0085029	extracellular matrix assembly	2/135	28/17913	0.0187496	0.0938226	0.0716868	GAS6/RGCC	2	B1
GO:2000406	positive regulation of T cell migration	2/135	28/17913	0.0187496	0.0938226	0.0716868	SELENOK/CCL5	2	B1
GO:0070536	protein K63-linked deubiquitination	2/135	29/17913	0.0200403	0.098304	0.0751109	TNFAIP3/OTUD1	2	B1
GO:0071480	cellular response to gamma radiation	2/135	29/17913	0.0200403	0.098304	0.0751109	HSPA5/CYBA	2	B1
GO:2000778	positive regulation of interleukin-6 secretion	2/135	29/17913	0.0200403	0.098304	0.0751109	XBP1/SELENOK	2	B1
GO:0046596	regulation of viral entry into host cell	2/135	30/17913	0.0213672	0.102832	0.0785706	LGALS1/P4HB	2	B1
GO:0033120	positive regulation of RNA splicing	2/135	31/17913	0.0227296	0.107741	0.0823211	ERN1/HSPA1A	2	B1
GO:0045648	positive regulation of erythrocyte differentiation	2/135	31/17913	0.0227296	0.107741	0.0823211	HSPA1B/HSPA1A	2	B1
GO:0051385	response to mineralocorticoid	2/135	31/17913	0.0227296	0.107741	0.0823211	FOSB/CYBA	2	B1
GO:0031112	positive regulation of microtubule polymerization or depolymerization	2/135	32/17913	0.0241269	0.111642	0.085302	HSPA1B/HSPA1A	2	B1
GO:0040018	positive regulation of multicellular organism growth	2/135	32/17913	0.0241269	0.111642	0.085302	BCL2/PPIB	2	B1
GO:0050931	pigment cell differentiation	2/135	32/17913	0.0241269	0.111642	0.085302	BCL2/CD63	2	B1
GO:0070232	regulation of T cell apoptotic process	2/135	32/17913	0.0241269	0.111642	0.085302	CD27/CCL5	2	B1
GO:0042554	superoxide anion generation	2/135	33/17913	0.0255586	0.116051	0.0886709	GSTP1/CYBA	2	B1
GO:0048147	negative regulation of fibroblast proliferation	2/135	33/17913	0.0255586	0.116051	0.0886709	GSTP1/TP53INP1	2	B1
GO:0071353	cellular response to interleukin-4	2/135	33/17913	0.0255586	0.116051	0.0886709	XBP1/HSPA5	2	B1
GO:2000352	negative regulation of endothelial cell apoptotic process	2/135	33/17913	0.0255586	0.116051	0.0886709	GAS6/TNFAIP3	2	B1
GO:0032691	negative regulation of interleukin-1 beta production	2/135	34/17913	0.027024	0.119964	0.0916604	GSTP1/TNFAIP3	2	B1
GO:0043276	anoikis	2/135	34/17913	0.027024	0.119964	0.0916604	BCL2/MCL1	2	B1
GO:0048536	spleen development	2/135	34/17913	0.027024	0.119964	0.0916604	BCL2/CITED2	2	B1
GO:2000403	positive regulation of lymphocyte migration	2/135	34/17913	0.027024	0.119964	0.0916604	SELENOK/CCL5	2	B1
GO:0021587	cerebellum morphogenesis	2/135	35/17913	0.0285226	0.124422	0.0950668	RORA/HSPA5	2	B1
GO:0045070	positive regulation of viral genome replication	2/135	35/17913	0.0285226	0.124422	0.0950668	PPIB/CCL5	2	B1
GO:0090322	regulation of superoxide metabolic process	2/135	35/17913	0.0285226	0.124422	0.0950668	GSTP1/CYBA	2	B1
GO:0110111	negative regulation of animal organ morphogenesis	2/135	35/17913	0.0285226	0.124422	0.0950668	FBXW7/BCL2	2	B1
GO:0010742	macrophage derived foam cell differentiation	2/135	36/17913	0.0300538	0.12843	0.0981295	SELENOK/NFKBIA	2	B1
GO:0055090	acylglycerol homeostasis	2/135	36/17913	0.0300538	0.12843	0.0981295	RORA/XBP1	2	B1
GO:0070328	triglyceride homeostasis	2/135	36/17913	0.0300538	0.12843	0.0981295	RORA/XBP1	2	B1
GO:0070670	response to interleukin-4	2/135	36/17913	0.0300538	0.12843	0.0981295	XBP1/HSPA5	2	B1
GO:0090077	foam cell differentiation	2/135	36/17913	0.0300538	0.12843	0.0981295	SELENOK/NFKBIA	2	B1
GO:0098801	regulation of renal system process	2/135	36/17913	0.0300538	0.12843	0.0981295	GAS6/CYBA	2	B1
GO:0014912	negative regulation of smooth muscle cell migration	2/135	37/17913	0.0316171	0.133077	0.10168	TRIB1/GSTP1	2	B1
GO:0032365	intracellular lipid transport	2/135	37/17913	0.0316171	0.133077	0.10168	LDLR/NPC2	2	B1
GO:0050691	regulation of defense response to virus by host	2/135	37/17913	0.0316171	0.133077	0.10168	TNFAIP3/SELENOK	2	B1
GO:0060236	regulation of mitotic spindle organization	2/135	37/17913	0.0316171	0.133077	0.10168	HSPA1B/HSPA1A	2	B1
GO:0010559	regulation of glycoprotein biosynthetic process	2/135	38/17913	0.0332118	0.136933	0.104626	BCL2/TMEM59	2	B1
GO:0043331	response to dsRNA	2/135	38/17913	0.0332118	0.136933	0.104626	PELI1/NFKBIA	2	B1
GO:1902042	negative regulation of extrinsic apoptotic signaling pathway via death domain receptors	2/135	38/17913	0.0332118	0.136933	0.104626	CFLAR/TNFAIP3	2	B1
GO:0010939	regulation of necrotic cell death	2/135	39/17913	0.0348374	0.141201	0.107887	PELI1/CFLAR	2	B1
GO:0019432	triglyceride biosynthetic process	2/135	39/17913	0.0348374	0.141201	0.107887	LDLR/FBXW7	2	B1
GO:0021575	hindbrain morphogenesis	2/135	39/17913	0.0348374	0.141201	0.107887	RORA/HSPA5	2	B1
GO:0030890	positive regulation of B cell proliferation	2/135	39/17913	0.0348374	0.141201	0.107887	PELI1/BCL2	2	B1
GO:0045746	negative regulation of Notch signaling pathway	2/135	39/17913	0.0348374	0.141201	0.107887	FBXW7/NFKBIA	2	B1
GO:0090207	regulation of triglyceride metabolic process	2/135	39/17913	0.0348374	0.141201	0.107887	LDLR/FBXW7	2	B1
GO:0038084	vascular endothelial growth factor signaling pathway	2/135	40/17913	0.0364934	0.1458	0.111401	CD63/HSPB1	2	B1
GO:0002639	positive regulation of immunoglobulin production	2/135	41/17913	0.0381793	0.148757	0.113661	XBP1/MZB1	2	B1
GO:0046460	neutral lipid biosynthetic process	2/135	41/17913	0.0381793	0.148757	0.113661	LDLR/FBXW7	2	B1
GO:0046463	acylglycerol biosynthetic process	2/135	41/17913	0.0381793	0.148757	0.113661	LDLR/FBXW7	2	B1
GO:0048066	developmental pigmentation	2/135	41/17913	0.0381793	0.148757	0.113661	BCL2/CD63	2	B1
GO:0060612	adipose tissue development	2/135	41/17913	0.0381793	0.148757	0.113661	SELENOM/XBP1	2	B1
GO:0090224	regulation of spindle organization	2/135	41/17913	0.0381793	0.148757	0.113661	HSPA1B/HSPA1A	2	B1
GO:1903053	regulation of extracellular matrix organization	2/135	41/17913	0.0381793	0.148757	0.113661	RGCC/CFLAR	2	B1
GO:2000404	regulation of T cell migration	2/135	41/17913	0.0381793	0.148757	0.113661	SELENOK/CCL5	2	B1
GO:0048247	lymphocyte chemotaxis	2/135	42/17913	0.0398944	0.153774	0.117493	GAS6/CCL5	2	B1
GO:0009409	response to cold	2/135	43/17913	0.0416382	0.158553	0.121145	DNAJC3/NFKBIA	2	B1
GO:0010883	regulation of lipid storage	2/135	43/17913	0.0416382	0.158553	0.121145	FBXW7/NFKBIA	2	B1
GO:0071364	cellular response to epidermal growth factor stimulus	2/135	43/17913	0.0416382	0.158553	0.121145	CFLAR/GSTP1	2	B1
GO:1901028	regulation of mitochondrial outer membrane permeabilization involved in apoptotic signaling pathway	2/135	43/17913	0.0416382	0.158553	0.121145	BCL2/HSPA1A	2	B1
GO:0034383	low-density lipoprotein particle clearance	2/135	44/17913	0.0434103	0.163569	0.124977	LDLR/NPC2	2	B1
GO:1903214	regulation of protein targeting to mitochondrion	2/135	44/17913	0.0434103	0.163569	0.124977	LMAN1/FBXW7	2	B1
GO:0070266	necroptotic process	2/135	45/17913	0.0452101	0.169388	0.129424	PELI1/CFLAR	2	B1
GO:1903018	regulation of glycoprotein metabolic process	2/135	45/17913	0.0452101	0.169388	0.129424	BCL2/TMEM59	2	B1
GO:0021695	cerebellar cortex development	2/135	46/17913	0.0470371	0.174348	0.133213	RORA/HSPA5	2	B1
GO:0031648	protein destabilization	2/135	46/17913	0.0470371	0.174348	0.133213	XBP1/FBXW7	2	B1
GO:0032757	positive regulation of interleukin-8 production	2/135	46/17913	0.0470371	0.174348	0.133213	HSPA1B/HSPA1A	2	B1
GO:0002832	negative regulation of response to biotic stimulus	2/135	47/17913	0.0488909	0.178604	0.136466	TRIB1/TNFAIP3	2	B1
GO:0014911	positive regulation of smooth muscle cell migration	2/135	47/17913	0.0488909	0.178604	0.136466	BCL2/CCL5	2	B1
GO:0031113	regulation of microtubule polymerization	2/135	47/17913	0.0488909	0.178604	0.136466	HSPA1B/HSPA1A	2	B1
GO:0033059	cellular pigmentation	2/135	47/17913	0.0488909	0.178604	0.136466	BCL2/CD63	2	B1
GO:0045646	regulation of erythrocyte differentiation	2/135	47/17913	0.0488909	0.178604	0.136466	HSPA1B/HSPA1A	2	B1
GO:0070849	response to epidermal growth factor	2/135	47/17913	0.0488909	0.178604	0.136466	CFLAR/GSTP1	2	B1
GO:0002762	negative regulation of myeloid leukocyte differentiation	2/135	48/17913	0.0507708	0.184135	0.140692	TRIB1/FBXW7	2	B1
GO:0031103	axon regeneration	2/135	48/17913	0.0507708	0.184135	0.140692	JUN/BCL2	2	B1
GO:0097300	programmed necrotic cell death	2/135	49/17913	0.0526764	0.189372	0.144693	PELI1/CFLAR	2	B1
GO:1904707	positive regulation of vascular smooth muscle cell proliferation	2/135	49/17913	0.0526764	0.189372	0.144693	ERN1/JUN	2	B1
GO:2001238	positive regulation of extrinsic apoptotic signaling pathway	2/135	49/17913	0.0526764	0.189372	0.144693	ATF3/ITM2C	2	B1
GO:0001774	microglial cell activation	2/135	50/17913	0.0546072	0.193586	0.147913	LDLR/JUN	2	B1
GO:0002269	leukocyte activation involved in inflammatory response	2/135	50/17913	0.0546072	0.193586	0.147913	LDLR/JUN	2	B1
GO:0032732	positive regulation of interleukin-1 production	2/135	50/17913	0.0546072	0.193586	0.147913	HSPB1/IGHD	2	B1
GO:0048146	positive regulation of fibroblast proliferation	2/135	51/17913	0.0565628	0.199396	0.152352	GAS6/JUN	2	B1
GO:0070228	regulation of lymphocyte apoptotic process	2/135	51/17913	0.0565628	0.199396	0.152352	CD27/CCL5	2	B1
GO:0090307	mitotic spindle assembly	2/135	52/17913	0.0585426	0.203491	0.155481	HSPA1B/HSPA1A	2	B1
GO:0097345	mitochondrial outer membrane permeabilization	2/135	52/17913	0.0585426	0.203491	0.155481	BCL2/HSPA1A	2	B1
GO:1901799	negative regulation of proteasomal protein catabolic process	2/135	52/17913	0.0585426	0.203491	0.155481	DERL3/ERLEC1	2	B1
GO:0002763	positive regulation of myeloid leukocyte differentiation	2/135	54/17913	0.0625732	0.215159	0.164396	TRIB1/JUN	2	B1
GO:0071385	cellular response to glucocorticoid stimulus	2/135	54/17913	0.0625732	0.215159	0.164396	CFLAR/GSTP1	2	B1
GO:0031102	neuron projection regeneration	2/135	55/17913	0.064623	0.21917	0.167461	JUN/BCL2	2	B1
GO:0070936	protein K48-linked ubiquitination	2/135	55/17913	0.064623	0.21917	0.167461	PELI1/TNFAIP3	2	B1
GO:0014888	striated muscle adaptation	2/135	56/17913	0.0666952	0.224128	0.171249	LMNA/CFLAR	2	B1
GO:0033344	cholesterol efflux	2/135	56/17913	0.0666952	0.224128	0.171249	NPC2/NFKBIA	2	B1
GO:1903202	negative regulation of oxidative stress-induced cell death	2/135	56/17913	0.0666952	0.224128	0.171249	PSAP/HSPB1	2	B1
GO:1900408	negative regulation of cellular response to oxidative stress	2/135	57/17913	0.0687894	0.228421	0.174529	PSAP/HSPB1	2	B1
GO:1903749	positive regulation of establishment of protein localization to mitochondrion	2/135	57/17913	0.0687894	0.228421	0.174529	FBXW7/BCL2	2	B1
GO:0070527	platelet aggregation	2/135	58/17913	0.070905	0.230095	0.175808	GAS6/HSPB1	2	B1
GO:0071384	cellular response to corticosteroid stimulus	2/135	58/17913	0.070905	0.230095	0.175808	CFLAR/GSTP1	2	B1
GO:1902110	positive regulation of mitochondrial membrane permeability involved in apoptotic process	2/135	58/17913	0.070905	0.230095	0.175808	BCL2/HSPA1A	2	B1
GO:0061900	glial cell activation	2/135	59/17913	0.0730418	0.230095	0.175808	LDLR/JUN	2	B1
GO:0072678	T cell migration	2/135	59/17913	0.0730418	0.230095	0.175808	SELENOK/CCL5	2	B1
GO:1902883	negative regulation of response to oxidative stress	2/135	59/17913	0.0730418	0.230095	0.175808	PSAP/HSPB1	2	B1
GO:1902686	mitochondrial outer membrane permeabilization involved in programmed cell death	2/135	60/17913	0.0751992	0.235257	0.179752	BCL2/HSPA1A	2	B1
GO:2000401	regulation of lymphocyte migration	2/135	60/17913	0.0751992	0.235257	0.179752	SELENOK/CCL5	2	B1
GO:0032835	glomerulus development	2/135	61/17913	0.0773769	0.237061	0.18113	BCL2/CFLAR	2	B1
GO:0032922	circadian regulation of gene expression	2/135	61/17913	0.0773769	0.237061	0.18113	BHLHE41/RORA	2	B1
GO:0035794	positive regulation of mitochondrial membrane permeability	2/135	62/17913	0.0795743	0.237061	0.18113	BCL2/HSPA1A	2	B1
GO:0048857	neural nucleus development	2/135	62/17913	0.0795743	0.237061	0.18113	BCL2/HSPA5	2	B1
GO:0070265	necrotic cell death	2/135	62/17913	0.0795743	0.237061	0.18113	PELI1/CFLAR	2	B1
GO:0015914	phospholipid transport	2/135	64/17913	0.084027	0.247075	0.188782	LDLR/NPC2	2	B1
GO:0019915	lipid storage	2/135	64/17913	0.084027	0.247075	0.188782	FBXW7/NFKBIA	2	B1
GO:0046782	regulation of viral transcription	2/135	64/17913	0.084027	0.247075	0.188782	JUN/CCL5	2	B1
GO:0071230	cellular response to amino acid stimulus	2/135	64/17913	0.084027	0.247075	0.188782	XBP1/CYBA	2	B1
GO:1902108	regulation of mitochondrial membrane permeability involved in apoptotic process	2/135	64/17913	0.084027	0.247075	0.188782	BCL2/HSPA1A	2	B1
GO:1905710	positive regulation of membrane permeability	2/135	64/17913	0.084027	0.247075	0.188782	BCL2/HSPA1A	2	B1
GO:2000378	negative regulation of reactive oxygen species metabolic process	2/135	64/17913	0.084027	0.247075	0.188782	BCL2/CFLAR	2	B1
GO:0006801	superoxide metabolic process	2/135	65/17913	0.0862813	0.248005	0.189492	GSTP1/CYBA	2	B1
GO:0043030	regulation of macrophage activation	2/135	66/17913	0.0885539	0.25072	0.191567	LDLR/RORA	2	B1
GO:0046785	microtubule polymerization	2/135	66/17913	0.0885539	0.25072	0.191567	HSPA1B/HSPA1A	2	B1
GO:0051926	negative regulation of calcium ion transport	2/135	66/17913	0.0885539	0.25072	0.191567	BCL2/TMBIM6	2	B1
GO:0040014	regulation of multicellular organism growth	2/135	67/17913	0.0908442	0.254983	0.194824	BCL2/PPIB	2	B1
GO:1903051	negative regulation of proteolysis involved in cellular protein catabolic process	2/135	67/17913	0.0908442	0.254983	0.194824	DERL3/ERLEC1	2	B1
GO:0031110	regulation of microtubule polymerization or depolymerization	2/135	69/17913	0.0954765	0.259239	0.198076	HSPA1B/HSPA1A	2	B1
GO:0002312	B cell activation involved in immune response	2/135	71/17913	0.100175	0.263849	0.201598	LGALS1/XBP1	2	B1
GO:0032677	regulation of interleukin-8 production	2/135	72/17913	0.102549	0.26859	0.205221	HSPA1B/HSPA1A	2	B1
GO:0072347	response to anesthetic	2/135	72/17913	0.102549	0.26859	0.205221	HSPA5/FOSB	2	B1
GO:0050688	regulation of defense response to virus	2/135	73/17913	0.104937	0.268834	0.205407	TNFAIP3/SELENOK	2	B1
GO:0046902	regulation of mitochondrial membrane permeability	2/135	74/17913	0.107341	0.268834	0.205407	BCL2/HSPA1A	2	B1
GO:0070373	negative regulation of ERK1 and ERK2 cascade	2/135	74/17913	0.107341	0.268834	0.205407	ATF3/GSTP1	2	B1
GO:0031016	pancreas development	2/135	75/17913	0.10976	0.27299	0.208583	XBP1/DNAAF1	2	B1
GO:0031100	animal organ regeneration	2/135	75/17913	0.10976	0.27299	0.208583	GAS6/GSTP1	2	B1
GO:0035050	embryonic heart tube development	2/135	75/17913	0.10976	0.27299	0.208583	CITED2/DNAAF1	2	B1
GO:0072332	intrinsic apoptotic signaling pathway by p53 class mediator	2/135	75/17913	0.10976	0.27299	0.208583	PERP/BCL2	2	B1
GO:0003281	ventricular septum development	2/135	76/17913	0.112193	0.276545	0.211299	PRDM1/CITED2	2	B1
GO:0048844	artery morphogenesis	2/135	76/17913	0.112193	0.276545	0.211299	PRDM1/LDLR	2	B1
GO:0150076	neuroinflammatory response	2/135	76/17913	0.112193	0.276545	0.211299	LDLR/JUN	2	B1
GO:0061418	regulation of transcription from RNA polymerase II promoter in response to hypoxia	2/135	77/17913	0.11464	0.277719	0.212196	CITED2/UBC	2	B1
GO:0032642	regulation of chemokine production	2/135	79/17913	0.119575	0.286674	0.219039	GSTP1/SELENOK	2	B1
GO:1900034	regulation of cellular response to heat	2/135	79/17913	0.119575	0.286674	0.219039	HSPA1B/HSPA1A	2	B1
GO:0003151	outflow tract morphogenesis	2/135	80/17913	0.122063	0.288752	0.220626	JUN/CITED2	2	B1
GO:0032637	interleukin-8 production	2/135	80/17913	0.122063	0.288752	0.220626	HSPA1B/HSPA1A	2	B1
GO:0050886	endocrine process	2/135	80/17913	0.122063	0.288752	0.220626	SELENOM/CYBA	2	B1
GO:1903363	negative regulation of cellular protein catabolic process	2/135	80/17913	0.122063	0.288752	0.220626	DERL3/ERLEC1	2	B1
GO:0002690	positive regulation of leukocyte chemotaxis	2/135	81/17913	0.124563	0.29274	0.223673	GAS6/CCL5	2	B1
GO:0014068	positive regulation of phosphatidylinositol 3-kinase signaling	2/135	81/17913	0.124563	0.29274	0.223673	MYDGF/CCL5	2	B1
GO:0046209	nitric oxide metabolic process	2/135	81/17913	0.124563	0.29274	0.223673	RORA/SELENOS	2	B1
GO:0051899	membrane depolarization	2/135	81/17913	0.124563	0.29274	0.223673	JUN/BCL2	2	B1
GO:1903533	regulation of protein targeting	2/135	81/17913	0.124563	0.29274	0.223673	LMAN1/FBXW7	2	B1
GO:0045445	myoblast differentiation	2/135	82/17913	0.127075	0.294641	0.225126	SDC1/LGALS1	2	B1
GO:0000079	regulation of cyclin-dependent protein serine/threonine kinase activity	2/135	83/17913	0.1296	0.298	0.227692	RGCC/TNFAIP3	2	B1
GO:0003073	regulation of systemic arterial blood pressure	2/135	83/17913	0.1296	0.298	0.227692	GAS6/CYBA	2	B1
GO:0010507	negative regulation of autophagy	2/135	83/17913	0.1296	0.298	0.227692	BCL2/MCL1	2	B1
GO:0045582	positive regulation of T cell differentiation	2/135	83/17913	0.1296	0.298	0.227692	CD27/XBP1	2	B1
GO:0006626	protein targeting to mitochondrion	2/135	84/17913	0.132136	0.298618	0.228164	LMAN1/FBXW7	2	B1
GO:0090559	regulation of membrane permeability	2/135	84/17913	0.132136	0.298618	0.228164	BCL2/HSPA1A	2	B1
GO:2001057	reactive nitrogen species metabolic process	2/135	84/17913	0.132136	0.298618	0.228164	RORA/SELENOS	2	B1
GO:0042475	odontogenesis of dentin-containing tooth	2/135	85/17913	0.134683	0.299468	0.228814	PERP/ITGA6	2	B1
GO:0043506	regulation of JUN kinase activity	2/135	85/17913	0.134683	0.299468	0.228814	ERN1/GSTP1	2	B1
GO:0045185	maintenance of protein location	2/135	85/17913	0.134683	0.299468	0.228814	HSPA5/NFKBIA	2	B1
GO:0006094	gluconeogenesis	2/135	86/17913	0.137242	0.303548	0.231931	SELENOS/ATF3	2	B1
GO:0032602	chemokine production	2/135	86/17913	0.137242	0.303548	0.231931	GSTP1/SELENOK	2	B1
GO:0033138	positive regulation of peptidyl-serine phosphorylation	2/135	86/17913	0.137242	0.303548	0.231931	GAS6/BCL2	2	B1
GO:1904029	regulation of cyclin-dependent protein kinase activity	2/135	87/17913	0.139811	0.30486	0.232934	RGCC/TNFAIP3	2	B1
GO:0019319	hexose biosynthetic process	2/135	89/17913	0.144981	0.311896	0.238309	SELENOS/ATF3	2	B1
GO:0042102	positive regulation of T cell proliferation	2/135	90/17913	0.147581	0.312245	0.238576	SELENOK/CCL5	2	B1
GO:0051225	spindle assembly	2/135	90/17913	0.147581	0.312245	0.238576	HSPA1B/HSPA1A	2	B1
GO:0043473	pigmentation	2/135	91/17913	0.150191	0.316874	0.242113	BCL2/CD63	2	B1
GO:0002702	positive regulation of production of molecular mediator of immune response	2/135	93/17913	0.155438	0.320686	0.245025	XBP1/MZB1	2	B1
GO:0046364	monosaccharide biosynthetic process	2/135	93/17913	0.155438	0.320686	0.245025	SELENOS/ATF3	2	B1
GO:0048010	vascular endothelial growth factor receptor signaling pathway	2/135	93/17913	0.155438	0.320686	0.245025	HSPB1/CYBA	2	B1
GO:0007229	integrin-mediated signaling pathway	2/135	94/17913	0.158074	0.323823	0.247422	ITGA6/CD63	2	B1
GO:0015748	organophosphate ester transport	2/135	94/17913	0.158074	0.323823	0.247422	LDLR/NPC2	2	B1
GO:0022600	digestive system process	2/135	94/17913	0.158074	0.323823	0.247422	LDLR/TYMP	2	B1
GO:0031109	microtubule polymerization or depolymerization	2/135	94/17913	0.158074	0.323823	0.247422	HSPA1B/HSPA1A	2	B1
GO:0007052	mitotic spindle organization	2/135	95/17913	0.160719	0.324924	0.248264	HSPA1B/HSPA1A	2	B1
GO:0007589	body fluid secretion	2/135	95/17913	0.160719	0.324924	0.248264	XBP1/CYBA	2	B1
GO:0008585	female gonad development	2/135	95/17913	0.160719	0.324924	0.248264	BCL2/HSPA5	2	B1
GO:0007044	cell-substrate junction assembly	2/135	96/17913	0.163373	0.329758	0.251958	ITGA6/BCL2	2	B1
GO:0001657	ureteric bud development	2/135	98/17913	0.168703	0.334087	0.255265	SDC1/BCL2	2	B1
GO:0021549	cerebellum development	2/135	98/17913	0.168703	0.334087	0.255265	RORA/HSPA5	2	B1
GO:0008593	regulation of Notch signaling pathway	2/135	99/17913	0.171379	0.336684	0.257249	FBXW7/NFKBIA	2	B1
GO:0048525	negative regulation of viral process	2/135	99/17913	0.171379	0.336684	0.257249	JUN/CCL5	2	B1
GO:0072163	mesonephric epithelium development	2/135	99/17913	0.171379	0.336684	0.257249	SDC1/BCL2	2	B1
GO:0072164	mesonephric tubule development	2/135	99/17913	0.171379	0.336684	0.257249	SDC1/BCL2	2	B1
GO:1902106	negative regulation of leukocyte differentiation	2/135	99/17913	0.171379	0.336684	0.257249	TRIB1/FBXW7	2	B1
GO:0046545	development of primary female sexual characteristics	2/135	100/17913	0.174062	0.339098	0.259094	BCL2/HSPA5	2	B1
GO:0060840	artery development	2/135	100/17913	0.174062	0.339098	0.259094	PRDM1/LDLR	2	B1
GO:0002367	cytokine production involved in immune response	2/135	101/17913	0.176752	0.341722	0.261098	GAS6/KDELR1	2	B1
GO:1903426	regulation of reactive oxygen species biosynthetic process	2/135	101/17913	0.176752	0.341722	0.261098	CFLAR/CYBA	2	B1
GO:2000379	positive regulation of reactive oxygen species metabolic process	2/135	101/17913	0.176752	0.341722	0.261098	GSTP1/CYBA	2	B1
GO:0001823	mesonephros development	2/135	103/17913	0.182152	0.347069	0.265184	SDC1/BCL2	2	B1
GO:0006606	protein import into nucleus	2/135	103/17913	0.182152	0.347069	0.265184	LMNA/NFKBIA	2	B1
GO:0032091	negative regulation of protein binding	2/135	103/17913	0.182152	0.347069	0.265184	HSPA5/TMBIM6	2	B1
GO:0002688	regulation of leukocyte chemotaxis	2/135	105/17913	0.187577	0.354187	0.270623	GAS6/CCL5	2	B1
GO:0006024	glycosaminoglycan biosynthetic process	2/135	107/17913	0.193024	0.358819	0.274162	SDC1/CHPF	2	B1
GO:0006023	aminoglycan biosynthetic process	2/135	108/17913	0.195755	0.362693	0.277122	SDC1/CHPF	2	B1
GO:0006805	xenobiotic metabolic process	2/135	110/17913	0.201233	0.36971	0.282483	RORA/GSTP1	2	B1
GO:0021782	glial cell development	2/135	111/17913	0.203978	0.371231	0.283646	LDLR/GSTP1	2	B1
GO:0030218	erythrocyte differentiation	2/135	112/17913	0.206728	0.375151	0.28664	HSPA1B/HSPA1A	2	B1
GO:0042157	lipoprotein metabolic process	2/135	112/17913	0.206728	0.375151	0.28664	LDLR/SELENOK	2	B1
GO:0003279	cardiac septum development	2/135	113/17913	0.209482	0.375278	0.286738	PRDM1/CITED2	2	B1
GO:0010508	positive regulation of autophagy	2/135	113/17913	0.209482	0.375278	0.286738	TMEM59/TP53INP1	2	B1
GO:0014896	muscle hypertrophy	2/135	113/17913	0.209482	0.375278	0.286738	LMNA/CYBA	2	B1
GO:0043666	regulation of phosphoprotein phosphatase activity	2/135	113/17913	0.209482	0.375278	0.286738	HSP90B1/PPP1R15A	2	B1
GO:0007368	determination of left/right symmetry	2/135	114/17913	0.212239	0.37887	0.289482	CITED2/DNAAF1	2	B1
GO:0042752	regulation of circadian rhythm	2/135	114/17913	0.212239	0.37887	0.289482	RORA/FBXW7	2	B1
GO:0046660	female sex differentiation	2/135	114/17913	0.212239	0.37887	0.289482	BCL2/HSPA5	2	B1
GO:1901222	regulation of NIK/NF-kappaB signaling	2/135	114/17913	0.212239	0.37887	0.289482	CD27/NFKBIA	2	B1
GO:0010822	positive regulation of mitochondrion organization	2/135	115/17913	0.215001	0.380594	0.2908	FBXW7/BCL2	2	B1
GO:0007569	cell aging	2/135	116/17913	0.217765	0.384323	0.293649	LMNA/BCL2	2	B1
GO:0032273	positive regulation of protein polymerization	2/135	116/17913	0.217765	0.384323	0.293649	HSPA1B/HSPA1A	2	B1
GO:1902850	microtubule cytoskeleton organization involved in mitosis	2/135	116/17913	0.217765	0.384323	0.293649	HSPA1B/HSPA1A	2	B1
GO:0014066	regulation of phosphatidylinositol 3-kinase signaling	2/135	117/17913	0.220533	0.384323	0.293649	MYDGF/CCL5	2	B1
GO:0034605	cellular response to heat	2/135	117/17913	0.220533	0.384323	0.293649	HSPA1B/HSPA1A	2	B1
GO:0051208	sequestering of calcium ion	2/135	117/17913	0.220533	0.384323	0.293649	HSP90B1/CYBA	2	B1
GO:0033135	regulation of peptidyl-serine phosphorylation	2/135	119/17913	0.226078	0.389967	0.297961	GAS6/BCL2	2	B1
GO:0034101	erythrocyte homeostasis	2/135	120/17913	0.228854	0.392923	0.30022	HSPA1B/HSPA1A	2	B1
GO:0006720	isoprenoid metabolic process	2/135	121/17913	0.231632	0.394609	0.301508	SDC1/NPC2	2	B1
GO:0007006	mitochondrial membrane organization	2/135	122/17913	0.234413	0.396784	0.30317	BCL2/HSPA1A	2	B1
GO:0042552	myelination	2/135	122/17913	0.234413	0.396784	0.30317	TYMP/PSAP	2	B1
GO:0009855	determination of bilateral symmetry	2/135	123/17913	0.237196	0.39985	0.305513	CITED2/DNAAF1	2	B1
GO:0032479	regulation of type I interferon production	2/135	123/17913	0.237196	0.39985	0.305513	ZBP1/TNFAIP3	2	B1
GO:0009799	specification of symmetry	2/135	124/17913	0.239981	0.400817	0.306252	CITED2/DNAAF1	2	B1
GO:0019218	regulation of steroid metabolic process	2/135	124/17913	0.239981	0.400817	0.306252	LDLR/RORA	2	B1
GO:0042177	negative regulation of protein catabolic process	2/135	124/17913	0.239981	0.400817	0.306252	DERL3/ERLEC1	2	B1
GO:0046330	positive regulation of JNK cascade	2/135	124/17913	0.239981	0.400817	0.306252	ERN1/CD27	2	B1
GO:2000134	negative regulation of G1/S transition of mitotic cell cycle	2/135	124/17913	0.239981	0.400817	0.306252	BCL2/RGCC	2	B1
GO:0032606	type I interferon production	2/135	125/17913	0.242767	0.403839	0.30856	ZBP1/TNFAIP3	2	B1
GO:0051170	import into nucleus	2/135	125/17913	0.242767	0.403839	0.30856	LMNA/NFKBIA	2	B1
GO:0007272	ensheathment of neurons	2/135	126/17913	0.245555	0.405021	0.309463	TYMP/PSAP	2	B1
GO:0008366	axon ensheathment	2/135	126/17913	0.245555	0.405021	0.309463	TYMP/PSAP	2	B1
GO:0060359	response to ammonium ion	2/135	126/17913	0.245555	0.405021	0.309463	HSPA5/FOSB	2	B1
GO:0032355	response to estradiol	2/135	128/17913	0.251134	0.409395	0.312805	CFLAR/GSTP1	2	B1
GO:0010595	positive regulation of endothelial cell migration	2/135	129/17913	0.253926	0.413137	0.315664	RHOB/HSPB1	2	B1
GO:1902807	negative regulation of cell cycle G1/S phase transition	2/135	130/17913	0.256718	0.41447	0.316683	BCL2/RGCC	2	B1
GO:0003231	cardiac ventricle development	2/135	131/17913	0.25951	0.418441	0.319717	PRDM1/CITED2	2	B1
GO:0045598	regulation of fat cell differentiation	2/135	131/17913	0.25951	0.418441	0.319717	RORA/XBP1	2	B1
GO:0007586	digestion	2/135	132/17913	0.262303	0.419452	0.320489	LDLR/TYMP	2	B1
GO:0051250	negative regulation of lymphocyte activation	2/135	132/17913	0.262303	0.419452	0.320489	PELI1/TNFAIP3	2	B1
GO:0010977	negative regulation of neuron projection development	2/135	135/17913	0.270683	0.426351	0.325761	LGALS1/ITM2C	2	B1
GO:2000241	regulation of reproductive process	2/135	135/17913	0.270683	0.426351	0.325761	PRDX4/CITED2	2	B1
GO:0051017	actin filament bundle assembly	2/135	136/17913	0.273476	0.429139	0.327891	HSP90B1/RGCC	2	B1
GO:0009411	response to UV	2/135	137/17913	0.276269	0.431604	0.329774	BCL2/TP53INP1	2	B1
GO:0035304	regulation of protein dephosphorylation	2/135	137/17913	0.276269	0.431604	0.329774	HSP90B1/PPP1R15A	2	B1
GO:0061572	actin filament bundle organization	2/135	137/17913	0.276269	0.431604	0.329774	HSP90B1/RGCC	2	B1
GO:0014065	phosphatidylinositol 3-kinase signaling	2/135	138/17913	0.279061	0.433044	0.330875	MYDGF/CCL5	2	B1
GO:0017038	protein import	2/135	140/17913	0.284643	0.436326	0.333383	LMNA/NFKBIA	2	B1
GO:0072073	kidney epithelium development	2/135	140/17913	0.284643	0.436326	0.333383	SDC1/BCL2	2	B1
GO:0072006	nephron development	2/135	142/17913	0.290222	0.440053	0.33623	BCL2/CFLAR	2	B1
GO:0050777	negative regulation of immune response	2/135	143/17913	0.293009	0.442359	0.337992	SELENOS/TNFAIP3	2	B1
GO:0061041	regulation of wound healing	2/135	143/17913	0.293009	0.442359	0.337992	XBP1/TNFAIP3	2	B1
GO:0043271	negative regulation of ion transport	2/135	144/17913	0.295795	0.443429	0.33881	BCL2/TMBIM6	2	B1
GO:0061351	neural precursor cell proliferation	2/135	144/17913	0.295795	0.443429	0.33881	RORA/ATF5	2	B1
GO:1903169	regulation of calcium ion transmembrane transport	2/135	144/17913	0.295795	0.443429	0.33881	AHNAK/CYBA	2	B1
GO:0002262	myeloid cell homeostasis	2/135	145/17913	0.29858	0.44585	0.34066	HSPA1B/HSPA1A	2	B1
GO:0042133	neurotransmitter metabolic process	2/135	145/17913	0.29858	0.44585	0.34066	RORA/SELENOS	2	B1
GO:0048592	eye morphogenesis	2/135	145/17913	0.29858	0.44585	0.34066	PRDM1/BCL2	2	B1
GO:0043524	negative regulation of neuron apoptotic process	2/135	146/17913	0.301363	0.448039	0.342332	JUN/BCL2	2	B1
GO:0007051	spindle organization	2/135	147/17913	0.304144	0.450003	0.343833	HSPA1B/HSPA1A	2	B1
GO:0008277	regulation of G protein-coupled receptor signaling pathway	2/135	148/17913	0.306923	0.452563	0.345789	RGS1/CCL5	2	B1
GO:0008643	carbohydrate transport	2/135	148/17913	0.306923	0.452563	0.345789	AQP3/SELENOS	2	B1
GO:0090316	positive regulation of intracellular protein transport	2/135	150/17913	0.312475	0.456472	0.348775	GAS6/FBXW7	2	B1
GO:1905952	regulation of lipid localization	2/135	151/17913	0.315248	0.45688	0.349087	FBXW7/NFKBIA	2	B1
GO:0030168	platelet activation	2/135	152/17913	0.318018	0.460295	0.351696	GAS6/HSPB1	2	B1
GO:0032874	positive regulation of stress-activated MAPK cascade	2/135	155/17913	0.326314	0.464817	0.355151	ERN1/CD27	2	B1
GO:0071695	anatomical structure maturation	2/135	155/17913	0.326314	0.464817	0.355151	XBP1/BCL2	2	B1
GO:0070304	positive regulation of stress-activated protein kinase signaling cascade	2/135	156/17913	0.329073	0.467893	0.357502	ERN1/CD27	2	B1
GO:0030203	glycosaminoglycan metabolic process	2/135	157/17913	0.331829	0.469222	0.358517	SDC1/CHPF	2	B1
GO:0048015	phosphatidylinositol-mediated signaling	2/135	160/17913	0.34008	0.477325	0.364709	MYDGF/CCL5	2	B1
GO:0006022	aminoglycan metabolic process	2/135	161/17913	0.342823	0.479647	0.366483	SDC1/CHPF	2	B1
GO:0031032	actomyosin structure organization	2/135	163/17913	0.348299	0.483167	0.369172	RGCC/CFLAR	2	B1
GO:0048017	inositol lipid-mediated signaling	2/135	163/17913	0.348299	0.483167	0.369172	MYDGF/CCL5	2	B1
GO:0050680	negative regulation of epithelial cell proliferation	2/135	163/17913	0.348299	0.483167	0.369172	FBXW7/RGCC	2	B1
GO:0030307	positive regulation of cell growth	2/135	166/17913	0.356485	0.488977	0.373611	BCL2/CYBA	2	B1
GO:0031345	negative regulation of cell projection organization	2/135	166/17913	0.356485	0.488977	0.373611	LGALS1/ITM2C	2	B1
GO:0051262	protein tetramerization	2/135	166/17913	0.356485	0.488977	0.373611	HM13/CCL5	2	B1
GO:0006612	protein targeting to membrane	2/135	167/17913	0.359205	0.490733	0.374953	SSR3/HSPA5	2	B1
GO:0048469	cell maturation	2/135	167/17913	0.359205	0.490733	0.374953	XBP1/BCL2	2	B1
GO:0008217	regulation of blood pressure	2/135	169/17913	0.364634	0.49252	0.376319	GAS6/CYBA	2	B1
GO:0022408	negative regulation of cell-cell adhesion	2/135	169/17913	0.364634	0.49252	0.376319	PELI1/RGCC	2	B1
GO:0030324	lung development	2/135	169/17913	0.364634	0.49252	0.376319	FBXW7/DNAAF1	2	B1
GO:0050796	regulation of insulin secretion	2/135	169/17913	0.364634	0.49252	0.376319	PHPT1/CCL5	2	B1
GO:0003205	cardiac chamber development	2/135	170/17913	0.367342	0.494968	0.378189	PRDM1/CITED2	2	B1
GO:0010921	regulation of phosphatase activity	2/135	171/17913	0.370046	0.495013	0.378224	HSP90B1/PPP1R15A	2	B1
GO:0030323	respiratory tube development	2/135	173/17913	0.375439	0.499726	0.381824	FBXW7/DNAAF1	2	B1
GO:0051897	positive regulation of protein kinase B signaling	2/135	173/17913	0.375439	0.499726	0.381824	GAS6/MYDGF	2	B1
GO:1903034	regulation of response to wounding	2/135	173/17913	0.375439	0.499726	0.381824	XBP1/TNFAIP3	2	B1
GO:0019083	viral transcription	2/135	177/17913	0.38617	0.508097	0.388221	JUN/CCL5	2	B1
GO:0021953	central nervous system neuron differentiation	2/135	177/17913	0.38617	0.508097	0.388221	RORA/ATF5	2	B1
GO:2000045	regulation of G1/S transition of mitotic cell cycle	2/135	177/17913	0.38617	0.508097	0.388221	BCL2/RGCC	2	B1
GO:0038061	NIK/NF-kappaB signaling	2/135	179/17913	0.391506	0.511907	0.391131	CD27/NFKBIA	2	B1
GO:0043409	negative regulation of MAPK cascade	2/135	179/17913	0.391506	0.511907	0.391131	ATF3/GSTP1	2	B1
GO:1901796	regulation of signal transduction by p53 class mediator	2/135	179/17913	0.391506	0.511907	0.391131	BCL2/TP53INP1	2	B1
GO:0010952	positive regulation of peptidase activity	2/135	180/17913	0.394166	0.512987	0.391957	PERP/CFLAR	2	B1
GO:0032271	regulation of protein polymerization	2/135	180/17913	0.394166	0.512987	0.391957	HSPA1B/HSPA1A	2	B1
GO:1905475	regulation of protein localization to membrane	2/135	181/17913	0.396821	0.514747	0.393301	BCL2/TMEM59	2	B1
GO:0048639	positive regulation of developmental growth	2/135	183/17913	0.402116	0.518237	0.395968	BCL2/PPIB	2	B1
GO:0030595	leukocyte chemotaxis	2/135	188/17913	0.415255	0.530935	0.40567	GAS6/CCL5	2	B1
GO:0044242	cellular lipid catabolic process	2/135	189/17913	0.417866	0.532272	0.406692	LDLR/PSAP	2	B1
GO:0060348	bone development	2/135	189/17913	0.417866	0.532272	0.406692	FBXW7/PPIB	2	B1
GO:0019080	viral gene expression	2/135	191/17913	0.423071	0.535379	0.409066	JUN/CCL5	2	B1
GO:0001763	morphogenesis of a branching structure	2/135	192/17913	0.425664	0.535698	0.40931	PRDM1/BCL2	2	B1
GO:0071897	DNA biosynthetic process	2/135	192/17913	0.425664	0.535698	0.40931	RGCC/UBC	2	B1
GO:0060541	respiratory system development	2/135	193/17913	0.428252	0.538416	0.411386	FBXW7/DNAAF1	2	B1
GO:0097164	ammonium ion metabolic process	2/135	193/17913	0.428252	0.538416	0.411386	LDLR/SAT1	2	B1
GO:0016051	carbohydrate biosynthetic process	2/135	194/17913	0.430833	0.539774	0.412424	SELENOS/ATF3	2	B1
GO:0046890	regulation of lipid biosynthetic process	2/135	195/17913	0.433408	0.541961	0.414095	LDLR/FBXW7	2	B1
GO:0002699	positive regulation of immune effector process	2/135	198/17913	0.441097	0.548549	0.419128	XBP1/MZB1	2	B1
GO:0048762	mesenchymal cell differentiation	2/135	199/17913	0.443647	0.549403	0.419781	BCL2/RGCC	2	B1
GO:0090276	regulation of peptide hormone secretion	2/135	199/17913	0.443647	0.549403	0.419781	PHPT1/CCL5	2	B1
GO:0030073	insulin secretion	2/135	200/17913	0.446191	0.549403	0.419781	PHPT1/CCL5	2	B1
GO:1901605	alpha-amino acid metabolic process	2/135	200/17913	0.446191	0.549403	0.419781	PRDX4/P4HB	2	B1
GO:0045665	negative regulation of neuron differentiation	2/135	201/17913	0.448728	0.551489	0.421375	LGALS1/ITM2C	2	B1
GO:2001020	regulation of response to DNA damage stimulus	2/135	201/17913	0.448728	0.551489	0.421375	BCL2/MCL1	2	B1
GO:0032388	positive regulation of intracellular transport	2/135	203/17913	0.453784	0.555115	0.424145	GAS6/FBXW7	2	B1
GO:0035303	regulation of dephosphorylation	2/135	206/17913	0.461318	0.560533	0.428285	HSP90B1/PPP1R15A	2	B1
GO:1901215	negative regulation of neuron death	2/135	207/17913	0.463816	0.561262	0.428842	JUN/BCL2	2	B1
GO:0046777	protein autophosphorylation	2/135	210/17913	0.47127	0.566198	0.432614	ERN1/JUN	2	B1
GO:0010001	glial cell differentiation	2/135	212/17913	0.476205	0.568869	0.434654	LDLR/GSTP1	2	B1
GO:0043583	ear development	2/135	212/17913	0.476205	0.568869	0.434654	BCL2/PSAP	2	B1
GO:0098813	nuclear chromosome segregation	2/135	220/17913	0.495664	0.583257	0.445648	MEI1/FBXW7	2	B1
GO:0001649	osteoblast differentiation	2/135	222/17913	0.500458	0.585613	0.447448	RRBP1/TPM4	2	B1
GO:0051054	positive regulation of DNA metabolic process	2/135	222/17913	0.500458	0.585613	0.447448	JUN/RGCC	2	B1
GO:0034504	protein localization to nucleus	2/135	223/17913	0.502844	0.587858	0.449163	LMNA/NFKBIA	2	B1
GO:0007018	microtubule-based movement	2/135	224/17913	0.505223	0.589439	0.450372	DNAAF1/HSPB1	2	B1
GO:0050851	antigen receptor-mediated signaling pathway	2/135	224/17913	0.505223	0.589439	0.450372	PHPT1/BCL2	2	B1
GO:0006352	DNA-templated transcription, initiation	2/135	231/17913	0.521668	0.600658	0.458943	RORA/JUN	2	B1
GO:0051258	protein polymerization	2/135	232/17913	0.523988	0.601717	0.459753	HSPA1B/HSPA1A	2	B1
GO:1901991	negative regulation of mitotic cell cycle phase transition	2/135	235/17913	0.530902	0.607738	0.464353	BCL2/RGCC	2	B1
GO:0072659	protein localization to plasma membrane	2/135	237/17913	0.535474	0.610411	0.466395	GAS6/TMEM59	2	B1
GO:0030072	peptide hormone secretion	2/135	241/17913	0.544526	0.618489	0.472567	PHPT1/CCL5	2	B1
GO:0051896	regulation of protein kinase B signaling	2/135	241/17913	0.544526	0.618489	0.472567	GAS6/MYDGF	2	B1
GO:0022898	regulation of transmembrane transporter activity	2/135	242/17913	0.54677	0.620198	0.473873	BCL2/AHNAK	2	B1
GO:0045017	glycerolipid biosynthetic process	2/135	246/17913	0.555669	0.627243	0.479256	LDLR/FBXW7	2	B1
GO:0007611	learning or memory	2/135	247/17913	0.557875	0.628827	0.480467	LDLR/JUN	2	B1
GO:0090596	sensory organ morphogenesis	2/135	250/17913	0.564446	0.632833	0.483527	PRDM1/BCL2	2	B1
GO:0046883	regulation of hormone secretion	2/135	254/17913	0.573099	0.638552	0.487897	PHPT1/CCL5	2	B1
GO:0032409	regulation of transporter activity	2/135	257/17913	0.579507	0.643413	0.491611	BCL2/AHNAK	2	B1
GO:0090305	nucleic acid phosphodiester bond hydrolysis	2/135	268/17913	0.602403	0.662308	0.506048	ERN1/UBC	2	B1
GO:0000082	G1/S transition of mitotic cell cycle	2/135	269/17913	0.604437	0.662617	0.506284	BCL2/RGCC	2	B1
GO:0016236	macroautophagy	2/135	272/17913	0.610495	0.668384	0.510691	ERN1/VMP1	2	B1
GO:0007059	chromosome segregation	2/135	275/17913	0.616482	0.674059	0.515027	MEI1/FBXW7	2	B1
GO:1990778	protein localization to cell periphery	2/135	276/17913	0.618462	0.675307	0.51598	GAS6/TMEM59	2	B1
GO:0042063	gliogenesis	2/135	285/17913	0.635933	0.687561	0.525343	LDLR/GSTP1	2	B1
GO:0050890	cognition	2/135	286/17913	0.637835	0.689026	0.526463	LDLR/JUN	2	B1
GO:0046034	ATP metabolic process	2/135	287/17913	0.63973	0.690184	0.527347	HSPA1B/HSPA1A	2	B1
GO:0032956	regulation of actin cytoskeleton organization	2/135	297/17913	0.658254	0.705332	0.538921	PHPT1/RGCC	2	B1
GO:0016042	lipid catabolic process	2/135	300/17913	0.663662	0.709315	0.541964	LDLR/PSAP	2	B1
GO:0009416	response to light stimulus	2/135	307/17913	0.676015	0.719159	0.549486	BCL2/TP53INP1	2	B1
GO:0045930	negative regulation of mitotic cell cycle	2/135	308/17913	0.67775	0.720395	0.550431	BCL2/RGCC	2	B1
GO:0051188	cofactor biosynthetic process	2/135	310/17913	0.681196	0.723143	0.55253	PDK1/CYBA	2	B1
GO:0009205	purine ribonucleoside triphosphate metabolic process	2/135	314/17913	0.688	0.727604	0.555938	HSPA1B/HSPA1A	2	B1
GO:0009167	purine ribonucleoside monophosphate metabolic process	2/135	317/17913	0.693025	0.731381	0.558825	HSPA1B/HSPA1A	2	B1
GO:0003002	regionalization	2/135	318/17913	0.694686	0.732213	0.55946	CITED2/DNAAF1	2	B1
GO:0009126	purine nucleoside monophosphate metabolic process	2/135	318/17913	0.694686	0.732213	0.55946	HSPA1B/HSPA1A	2	B1
GO:0009199	ribonucleoside triphosphate metabolic process	2/135	319/17913	0.696339	0.733648	0.560556	HSPA1B/HSPA1A	2	B1
GO:0001505	regulation of neurotransmitter levels	2/135	321/17913	0.699622	0.735875	0.562258	RORA/SELENOS	2	B1
GO:0009144	purine nucleoside triphosphate metabolic process	2/135	321/17913	0.699622	0.735875	0.562258	HSPA1B/HSPA1A	2	B1
GO:0048638	regulation of developmental growth	2/135	325/17913	0.706103	0.741452	0.566519	BCL2/PPIB	2	B1
GO:0009161	ribonucleoside monophosphate metabolic process	2/135	331/17913	0.715606	0.750179	0.573188	HSPA1B/HSPA1A	2	B1
GO:0032259	methylation	2/135	336/17913	0.723329	0.756385	0.577929	PRDM1/LMNA	2	B1
GO:0009141	nucleoside triphosphate metabolic process	2/135	337/17913	0.724852	0.757216	0.578564	HSPA1B/HSPA1A	2	B1
GO:0032970	regulation of actin filament-based process	2/135	341/17913	0.730876	0.762377	0.582507	PHPT1/RGCC	2	B1
GO:0001701	in utero embryonic development	2/135	342/17913	0.732364	0.763297	0.58321	PRDM1/DAD1	2	B1
GO:0006936	muscle contraction	2/135	343/17913	0.733846	0.764208	0.583906	JSRP1/TPM4	2	B1
GO:0006520	cellular amino acid metabolic process	2/135	347/17913	0.739703	0.767766	0.586625	PRDX4/P4HB	2	B1
GO:0009123	nucleoside monophosphate metabolic process	2/135	349/17913	0.742591	0.769177	0.587703	HSPA1B/HSPA1A	2	B1
GO:0042391	regulation of membrane potential	2/135	374/17913	0.776441	0.798106	0.609807	JUN/BCL2	2	B1
GO:0007389	pattern specification process	2/135	408/17913	0.816243	0.835496	0.638375	CITED2/DNAAF1	2	B1
GO:1901990	regulation of mitotic cell cycle phase transition	2/135	428/17913	0.836606	0.854254	0.652708	BCL2/RGCC	2	B1
GO:0061564	axon development	2/135	438/17913	0.846009	0.862457	0.658975	JUN/BCL2	2	B1
GO:0001501	skeletal system development	2/135	479/17913	0.879662	0.893506	0.682699	FBXW7/PPIB	2	B1
GO:0016055	Wnt signaling pathway	2/135	498/17913	0.892851	0.903766	0.690538	SDC1/UBC	2	B1
GO:0198738	cell-cell signaling by wnt	2/135	500/17913	0.894159	0.904582	0.691161	SDC1/UBC	2	B1
GO:0003356	regulation of cilium beat frequency	1/135	10/17913	0.0728768	0.230095	0.175808	DNAAF1	1	B1
GO:0006596	polyamine biosynthetic process	1/135	10/17913	0.0728768	0.230095	0.175808	SAT1	1	B1
GO:0007084	mitotic nuclear envelope reassembly	1/135	10/17913	0.0728768	0.230095	0.175808	LMNA	1	B1
GO:0010944	negative regulation of transcription by competitive promoter binding	1/135	10/17913	0.0728768	0.230095	0.175808	BHLHE41	1	B1
GO:0010998	regulation of translational initiation by eIF2 alpha phosphorylation	1/135	10/17913	0.0728768	0.230095	0.175808	DNAJC3	1	B1
GO:0014041	regulation of neuron maturation	1/135	10/17913	0.0728768	0.230095	0.175808	BCL2	1	B1
GO:0019062	virion attachment to host cell	1/135	10/17913	0.0728768	0.230095	0.175808	GAS6	1	B1
GO:0021548	pons development	1/135	10/17913	0.0728768	0.230095	0.175808	BCL2	1	B1
GO:0033483	gas homeostasis	1/135	10/17913	0.0728768	0.230095	0.175808	GSTP1	1	B1
GO:0034350	regulation of glial cell apoptotic process	1/135	10/17913	0.0728768	0.230095	0.175808	GAS6	1	B1
GO:0034378	chylomicron assembly	1/135	10/17913	0.0728768	0.230095	0.175808	P4HB	1	B1
GO:0035376	sterol import	1/135	10/17913	0.0728768	0.230095	0.175808	LDLR	1	B1
GO:0035646	endosome to melanosome transport	1/135	10/17913	0.0728768	0.230095	0.175808	CD63	1	B1
GO:0035871	protein K11-linked deubiquitination	1/135	10/17913	0.0728768	0.230095	0.175808	TNFAIP3	1	B1
GO:0035878	nail development	1/135	10/17913	0.0728768	0.230095	0.175808	ITGA6	1	B1
GO:0042023	DNA endoreduplication	1/135	10/17913	0.0728768	0.230095	0.175808	FBXW7	1	B1
GO:0043485	endosome to pigment granule transport	1/135	10/17913	0.0728768	0.230095	0.175808	CD63	1	B1
GO:0044803	multi-organism membrane organization	1/135	10/17913	0.0728768	0.230095	0.175808	GAS6	1	B1
GO:0045657	positive regulation of monocyte differentiation	1/135	10/17913	0.0728768	0.230095	0.175808	JUN	1	B1
GO:0045741	positive regulation of epidermal growth factor-activated receptor activity	1/135	10/17913	0.0728768	0.230095	0.175808	FBXW7	1	B1
GO:0048245	eosinophil chemotaxis	1/135	10/17913	0.0728768	0.230095	0.175808	CCL5	1	B1
GO:0048757	pigment granule maturation	1/135	10/17913	0.0728768	0.230095	0.175808	CD63	1	B1
GO:0060287	epithelial cilium movement involved in determination of left/right asymmetry	1/135	10/17913	0.0728768	0.230095	0.175808	DNAAF1	1	B1
GO:0070099	regulation of chemokine-mediated signaling pathway	1/135	10/17913	0.0728768	0.230095	0.175808	CCL5	1	B1
GO:0070508	cholesterol import	1/135	10/17913	0.0728768	0.230095	0.175808	LDLR	1	B1
GO:0071501	cellular response to sterol depletion	1/135	10/17913	0.0728768	0.230095	0.175808	FBXW7	1	B1
GO:0071639	positive regulation of monocyte chemotactic protein-1 production	1/135	10/17913	0.0728768	0.230095	0.175808	SELENOK	1	B1
GO:0071670	smooth muscle cell chemotaxis	1/135	10/17913	0.0728768	0.230095	0.175808	GSTP1	1	B1
GO:0072124	regulation of glomerular mesangial cell proliferation	1/135	10/17913	0.0728768	0.230095	0.175808	CFLAR	1	B1
GO:1900426	positive regulation of defense response to bacterium	1/135	10/17913	0.0728768	0.230095	0.175808	CYBA	1	B1
GO:1904350	regulation of protein catabolic process in the vacuole	1/135	10/17913	0.0728768	0.230095	0.175808	LDLR	1	B1
GO:0002638	negative regulation of immunoglobulin production	1/135	11/17913	0.0798678	0.237061	0.18113	TMBIM6	1	B1
GO:0006681	galactosylceramide metabolic process	1/135	11/17913	0.0798678	0.237061	0.18113	PSAP	1	B1
GO:0006991	response to sterol depletion	1/135	11/17913	0.0798678	0.237061	0.18113	FBXW7	1	B1
GO:0008655	pyrimidine-containing compound salvage	1/135	11/17913	0.0798678	0.237061	0.18113	TYMP	1	B1
GO:0010623	programmed cell death involved in cell development	1/135	11/17913	0.0798678	0.237061	0.18113	BCL2	1	B1
GO:0015791	polyol transport	1/135	11/17913	0.0798678	0.237061	0.18113	AQP3	1	B1
GO:0019755	one-carbon compound transport	1/135	11/17913	0.0798678	0.237061	0.18113	AQP3	1	B1
GO:0031581	hemidesmosome assembly	1/135	11/17913	0.0798678	0.237061	0.18113	ITGA6	1	B1
GO:0033632	regulation of cell-cell adhesion mediated by integrin	1/135	11/17913	0.0798678	0.237061	0.18113	CCL5	1	B1
GO:0033860	regulation of NAD(P)H oxidase activity	1/135	11/17913	0.0798678	0.237061	0.18113	CYBA	1	B1
GO:0034379	very-low-density lipoprotein particle assembly	1/135	11/17913	0.0798678	0.237061	0.18113	P4HB	1	B1
GO:0035457	cellular response to interferon-alpha	1/135	11/17913	0.0798678	0.237061	0.18113	GAS6	1	B1
GO:0035747	natural killer cell chemotaxis	1/135	11/17913	0.0798678	0.237061	0.18113	CCL5	1	B1
GO:0043097	pyrimidine nucleoside salvage	1/135	11/17913	0.0798678	0.237061	0.18113	TYMP	1	B1
GO:0045141	meiotic telomere clustering	1/135	11/17913	0.0798678	0.237061	0.18113	MEI1	1	B1
GO:0051024	positive regulation of immunoglobulin secretion	1/135	11/17913	0.0798678	0.237061	0.18113	XBP1	1	B1
GO:0051574	positive regulation of histone H3-K9 methylation	1/135	11/17913	0.0798678	0.237061	0.18113	LMNA	1	B1
GO:0055015	ventricular cardiac muscle cell development	1/135	11/17913	0.0798678	0.237061	0.18113	LMNA	1	B1
GO:0070254	mucus secretion	1/135	11/17913	0.0798678	0.237061	0.18113	CYBA	1	B1
GO:0070278	extracellular matrix constituent secretion	1/135	11/17913	0.0798678	0.237061	0.18113	RGCC	1	B1
GO:0072110	glomerular mesangial cell proliferation	1/135	11/17913	0.0798678	0.237061	0.18113	CFLAR	1	B1
GO:0072537	fibroblast activation	1/135	11/17913	0.0798678	0.237061	0.18113	RGCC	1	B1
GO:0090193	positive regulation of glomerulus development	1/135	11/17913	0.0798678	0.237061	0.18113	CFLAR	1	B1
GO:0090209	negative regulation of triglyceride metabolic process	1/135	11/17913	0.0798678	0.237061	0.18113	FBXW7	1	B1
GO:0097048	dendritic cell apoptotic process	1/135	11/17913	0.0798678	0.237061	0.18113	GAS6	1	B1
GO:1900112	regulation of histone H3-K9 trimethylation	1/135	11/17913	0.0798678	0.237061	0.18113	LMNA	1	B1
GO:1901201	regulation of extracellular matrix assembly	1/135	11/17913	0.0798678	0.237061	0.18113	RGCC	1	B1
GO:1902065	response to L-glutamate	1/135	11/17913	0.0798678	0.237061	0.18113	TMBIM6	1	B1
GO:1903979	negative regulation of microglial cell activation	1/135	11/17913	0.0798678	0.237061	0.18113	LDLR	1	B1
GO:1904424	regulation of GTP binding	1/135	11/17913	0.0798678	0.237061	0.18113	CCPG1	1	B1
GO:1905146	lysosomal protein catabolic process	1/135	11/17913	0.0798678	0.237061	0.18113	LDLR	1	B1
GO:1905383	protein localization to presynapse	1/135	11/17913	0.0798678	0.237061	0.18113	HSPB1	1	B1
GO:1905941	positive regulation of gonad development	1/135	11/17913	0.0798678	0.237061	0.18113	CITED2	1	B1
GO:2000668	regulation of dendritic cell apoptotic process	1/135	11/17913	0.0798678	0.237061	0.18113	GAS6	1	B1
GO:2001204	regulation of osteoclast development	1/135	11/17913	0.0798678	0.237061	0.18113	FBXW7	1	B1
GO:0002862	negative regulation of inflammatory response to antigenic stimulus	1/135	12/17913	0.0868066	0.248005	0.189492	SELENOS	1	B1
GO:0003084	positive regulation of systemic arterial blood pressure	1/135	12/17913	0.0868066	0.248005	0.189492	CYBA	1	B1
GO:0003334	keratinocyte development	1/135	12/17913	0.0868066	0.248005	0.189492	PSAP	1	B1
GO:0014889	muscle atrophy	1/135	12/17913	0.0868066	0.248005	0.189492	CFLAR	1	B1
GO:0019374	galactolipid metabolic process	1/135	12/17913	0.0868066	0.248005	0.189492	PSAP	1	B1
GO:0021889	olfactory bulb interneuron differentiation	1/135	12/17913	0.0868066	0.248005	0.189492	ATF5	1	B1
GO:0034397	telomere localization	1/135	12/17913	0.0868066	0.248005	0.189492	MEI1	1	B1
GO:0035627	ceramide transport	1/135	12/17913	0.0868066	0.248005	0.189492	PSAP	1	B1
GO:0042159	lipoprotein catabolic process	1/135	12/17913	0.0868066	0.248005	0.189492	LDLR	1	B1
GO:0043476	pigment accumulation	1/135	12/17913	0.0868066	0.248005	0.189492	CD63	1	B1
GO:0043482	cellular pigment accumulation	1/135	12/17913	0.0868066	0.248005	0.189492	CD63	1	B1
GO:0044650	adhesion of symbiont to host cell	1/135	12/17913	0.0868066	0.248005	0.189492	GAS6	1	B1
GO:0045346	regulation of MHC class II biosynthetic process	1/135	12/17913	0.0868066	0.248005	0.189492	XBP1	1	B1
GO:0045779	negative regulation of bone resorption	1/135	12/17913	0.0868066	0.248005	0.189492	TNFAIP3	1	B1
GO:0046479	glycosphingolipid catabolic process	1/135	12/17913	0.0868066	0.248005	0.189492	PSAP	1	B1
GO:0060707	trophoblast giant cell differentiation	1/135	12/17913	0.0868066	0.248005	0.189492	PRDM1	1	B1
GO:0070986	left/right axis specification	1/135	12/17913	0.0868066	0.248005	0.189492	CITED2	1	B1
GO:0090220	chromosome localization to nuclear envelope involved in homologous chromosome segregation	1/135	12/17913	0.0868066	0.248005	0.189492	MEI1	1	B1
GO:0097284	hepatocyte apoptotic process	1/135	12/17913	0.0868066	0.248005	0.189492	CFLAR	1	B1
GO:0099640	axo-dendritic protein transport	1/135	12/17913	0.0868066	0.248005	0.189492	HSPB1	1	B1
GO:1900165	negative regulation of interleukin-6 secretion	1/135	12/17913	0.0868066	0.248005	0.189492	GAS6	1	B1
GO:0002679	respiratory burst involved in defense response	1/135	13/17913	0.0936934	0.254983	0.194824	SELENOK	1	B1
GO:0002864	regulation of acute inflammatory response to antigenic stimulus	1/135	13/17913	0.0936934	0.254983	0.194824	SELENOS	1	B1
GO:0003352	regulation of cilium movement	1/135	13/17913	0.0936934	0.254983	0.194824	DNAAF1	1	B1
GO:0006206	pyrimidine nucleobase metabolic process	1/135	13/17913	0.0936934	0.254983	0.194824	TYMP	1	B1
GO:0010561	negative regulation of glycoprotein biosynthetic process	1/135	13/17913	0.0936934	0.254983	0.194824	TMEM59	1	B1
GO:0010745	negative regulation of macrophage derived foam cell differentiation	1/135	13/17913	0.0936934	0.254983	0.194824	NFKBIA	1	B1
GO:0014745	negative regulation of muscle adaptation	1/135	13/17913	0.0936934	0.254983	0.194824	LMNA	1	B1
GO:0014842	regulation of skeletal muscle satellite cell proliferation	1/135	13/17913	0.0936934	0.254983	0.194824	CFLAR	1	B1
GO:0021692	cerebellar Purkinje cell layer morphogenesis	1/135	13/17913	0.0936934	0.254983	0.194824	RORA	1	B1
GO:0030299	intestinal cholesterol absorption	1/135	13/17913	0.0936934	0.254983	0.194824	LDLR	1	B1
GO:0031953	negative regulation of protein autophosphorylation	1/135	13/17913	0.0936934	0.254983	0.194824	JUN	1	B1
GO:0032096	negative regulation of response to food	1/135	13/17913	0.0936934	0.254983	0.194824	NUCB2	1	B1
GO:0032099	negative regulation of appetite	1/135	13/17913	0.0936934	0.254983	0.194824	NUCB2	1	B1
GO:0036158	outer dynein arm assembly	1/135	13/17913	0.0936934	0.254983	0.194824	DNAAF1	1	B1
GO:0036159	inner dynein arm assembly	1/135	13/17913	0.0936934	0.254983	0.194824	DNAAF1	1	B1
GO:0038092	nodal signaling pathway	1/135	13/17913	0.0936934	0.254983	0.194824	CITED2	1	B1
GO:0043374	CD8-positive, alpha-beta T cell differentiation	1/135	13/17913	0.0936934	0.254983	0.194824	BCL2	1	B1
GO:0044794	positive regulation by host of viral process	1/135	13/17913	0.0936934	0.254983	0.194824	PPIB	1	B1
GO:0045342	MHC class II biosynthetic process	1/135	13/17913	0.0936934	0.254983	0.194824	XBP1	1	B1
GO:0060576	intestinal epithelial cell development	1/135	13/17913	0.0936934	0.254983	0.194824	PRDM1	1	B1
GO:0061029	eyelid development in camera-type eye	1/135	13/17913	0.0936934	0.254983	0.194824	JUN	1	B1
GO:0061888	regulation of astrocyte activation	1/135	13/17913	0.0936934	0.254983	0.194824	LDLR	1	B1
GO:0071287	cellular response to manganese ion	1/135	13/17913	0.0936934	0.254983	0.194824	HSPA5	1	B1
GO:0071850	mitotic cell cycle arrest	1/135	13/17913	0.0936934	0.254983	0.194824	RGCC	1	B1
GO:1903025	regulation of RNA polymerase II regulatory region sequence-specific DNA binding	1/135	13/17913	0.0936934	0.254983	0.194824	FBXW7	1	B1
GO:2001044	regulation of integrin-mediated signaling pathway	1/135	13/17913	0.0936934	0.254983	0.194824	CD63	1	B1
GO:0006595	polyamine metabolic process	1/135	14/17913	0.100529	0.263849	0.201598	SAT1	1	B1
GO:0010820	positive regulation of T cell chemotaxis	1/135	14/17913	0.100529	0.263849	0.201598	CCL5	1	B1
GO:0010867	positive regulation of triglyceride biosynthetic process	1/135	14/17913	0.100529	0.263849	0.201598	LDLR	1	B1
GO:0014841	skeletal muscle satellite cell proliferation	1/135	14/17913	0.100529	0.263849	0.201598	CFLAR	1	B1
GO:0014857	regulation of skeletal muscle cell proliferation	1/135	14/17913	0.100529	0.263849	0.201598	CFLAR	1	B1
GO:0035358	regulation of peroxisome proliferator activated receptor signaling pathway	1/135	14/17913	0.100529	0.263849	0.201598	CITED2	1	B1
GO:0042976	activation of Janus kinase activity	1/135	14/17913	0.100529	0.263849	0.201598	CCL5	1	B1
GO:0045651	positive regulation of macrophage differentiation	1/135	14/17913	0.100529	0.263849	0.201598	TRIB1	1	B1
GO:0046068	cGMP metabolic process	1/135	14/17913	0.100529	0.263849	0.201598	RORA	1	B1
GO:0046851	negative regulation of bone remodeling	1/135	14/17913	0.100529	0.263849	0.201598	TNFAIP3	1	B1
GO:0048368	lateral mesoderm development	1/135	14/17913	0.100529	0.263849	0.201598	CITED2	1	B1
GO:0048712	negative regulation of astrocyte differentiation	1/135	14/17913	0.100529	0.263849	0.201598	LDLR	1	B1
GO:0050713	negative regulation of interleukin-1 beta secretion	1/135	14/17913	0.100529	0.263849	0.201598	TNFAIP3	1	B1
GO:0051775	response to redox state	1/135	14/17913	0.100529	0.263849	0.201598	SELENOS	1	B1
GO:0060049	regulation of protein glycosylation	1/135	14/17913	0.100529	0.263849	0.201598	TMEM59	1	B1
GO:0070234	positive regulation of T cell apoptotic process	1/135	14/17913	0.100529	0.263849	0.201598	CCL5	1	B1
GO:0071361	cellular response to ethanol	1/135	14/17913	0.100529	0.263849	0.201598	TP53INP1	1	B1
GO:0072677	eosinophil migration	1/135	14/17913	0.100529	0.263849	0.201598	CCL5	1	B1
GO:0097202	activation of cysteine-type endopeptidase activity	1/135	14/17913	0.100529	0.263849	0.201598	PERP	1	B1
GO:1901722	regulation of cell proliferation involved in kidney development	1/135	14/17913	0.100529	0.263849	0.201598	CFLAR	1	B1
GO:1902043	positive regulation of extrinsic apoptotic signaling pathway via death domain receptors	1/135	14/17913	0.100529	0.263849	0.201598	ATF3	1	B1
GO:0002467	germinal center formation	1/135	15/17913	0.107313	0.268834	0.205407	TNFAIP3	1	B1
GO:0007039	protein catabolic process in the vacuole	1/135	15/17913	0.107313	0.268834	0.205407	LDLR	1	B1
GO:0010759	positive regulation of macrophage chemotaxis	1/135	15/17913	0.107313	0.268834	0.205407	CCL5	1	B1
GO:0010819	regulation of T cell chemotaxis	1/135	15/17913	0.107313	0.268834	0.205407	CCL5	1	B1
GO:0014856	skeletal muscle cell proliferation	1/135	15/17913	0.107313	0.268834	0.205407	CFLAR	1	B1
GO:0018298	protein-chromophore linkage	1/135	15/17913	0.107313	0.268834	0.205407	IGHA1	1	B1
GO:0019377	glycolipid catabolic process	1/135	15/17913	0.107313	0.268834	0.205407	PSAP	1	B1
GO:0030852	regulation of granulocyte differentiation	1/135	15/17913	0.107313	0.268834	0.205407	TRIB1	1	B1
GO:0031468	nuclear envelope reassembly	1/135	15/17913	0.107313	0.268834	0.205407	LMNA	1	B1
GO:0032105	negative regulation of response to extracellular stimulus	1/135	15/17913	0.107313	0.268834	0.205407	NUCB2	1	B1
GO:0032108	negative regulation of response to nutrient levels	1/135	15/17913	0.107313	0.268834	0.205407	NUCB2	1	B1
GO:0033689	negative regulation of osteoblast proliferation	1/135	15/17913	0.107313	0.268834	0.205407	BCL2	1	B1
GO:0034349	glial cell apoptotic process	1/135	15/17913	0.107313	0.268834	0.205407	GAS6	1	B1
GO:0035930	corticosteroid hormone secretion	1/135	15/17913	0.107313	0.268834	0.205407	SELENOM	1	B1
GO:0042535	positive regulation of tumor necrosis factor biosynthetic process	1/135	15/17913	0.107313	0.268834	0.205407	HSPB1	1	B1
GO:0042762	regulation of sulfur metabolic process	1/135	15/17913	0.107313	0.268834	0.205407	PDK1	1	B1
GO:0042994	cytoplasmic sequestering of transcription factor	1/135	15/17913	0.107313	0.268834	0.205407	NFKBIA	1	B1
GO:0043508	negative regulation of JUN kinase activity	1/135	15/17913	0.107313	0.268834	0.205407	GSTP1	1	B1
GO:0044406	adhesion of symbiont to host	1/135	15/17913	0.107313	0.268834	0.205407	GAS6	1	B1
GO:0055089	fatty acid homeostasis	1/135	15/17913	0.107313	0.268834	0.205407	XBP1	1	B1
GO:0060009	Sertoli cell development	1/135	15/17913	0.107313	0.268834	0.205407	SDC1	1	B1
GO:0070262	peptidyl-serine dephosphorylation	1/135	15/17913	0.107313	0.268834	0.205407	PPP1R15A	1	B1
GO:0071218	cellular response to misfolded protein	1/135	15/17913	0.107313	0.268834	0.205407	SDF2L1	1	B1
GO:0072109	glomerular mesangium development	1/135	15/17913	0.107313	0.268834	0.205407	CFLAR	1	B1
GO:0090192	regulation of glomerulus development	1/135	15/17913	0.107313	0.268834	0.205407	CFLAR	1	B1
GO:0090197	positive regulation of chemokine secretion	1/135	15/17913	0.107313	0.268834	0.205407	SELENOK	1	B1
GO:0098840	protein transport along microtubule	1/135	15/17913	0.107313	0.268834	0.205407	HSPB1	1	B1
GO:0098856	intestinal lipid absorption	1/135	15/17913	0.107313	0.268834	0.205407	LDLR	1	B1
GO:0099118	microtubule-based protein transport	1/135	15/17913	0.107313	0.268834	0.205407	HSPB1	1	B1
GO:1900037	regulation of cellular response to hypoxia	1/135	15/17913	0.107313	0.268834	0.205407	TMBIM6	1	B1
GO:1903543	positive regulation of exosomal secretion	1/135	15/17913	0.107313	0.268834	0.205407	SDC1	1	B1
GO:1904294	positive regulation of ERAD pathway	1/135	15/17913	0.107313	0.268834	0.205407	HERPUD1	1	B1
GO:1990000	amyloid fibril formation	1/135	15/17913	0.107313	0.268834	0.205407	LDLR	1	B1
GO:2000047	regulation of cell-cell adhesion mediated by cadherin	1/135	15/17913	0.107313	0.268834	0.205407	RGCC	1	B1
GO:2001028	positive regulation of endothelial cell chemotaxis	1/135	15/17913	0.107313	0.268834	0.205407	HSPB1	1	B1
GO:0000394	RNA splicing, via endonucleolytic cleavage and ligation	1/135	16/17913	0.114046	0.276545	0.211299	ERN1	1	B1
GO:0002070	epithelial cell maturation	1/135	16/17913	0.114046	0.276545	0.211299	XBP1	1	B1
GO:0006086	acetyl-CoA biosynthetic process from pyruvate	1/135	16/17913	0.114046	0.276545	0.211299	PDK1	1	B1
GO:0007096	regulation of exit from mitosis	1/135	16/17913	0.114046	0.276545	0.211299	RGCC	1	B1
GO:0010875	positive regulation of cholesterol efflux	1/135	16/17913	0.114046	0.276545	0.211299	NFKBIA	1	B1
GO:0010934	macrophage cytokine production	1/135	16/17913	0.114046	0.276545	0.211299	GAS6	1	B1
GO:0033631	cell-cell adhesion mediated by integrin	1/135	16/17913	0.114046	0.276545	0.211299	CCL5	1	B1
GO:0035459	cargo loading into vesicle	1/135	16/17913	0.114046	0.276545	0.211299	TMED10	1	B1
GO:0035970	peptidyl-threonine dephosphorylation	1/135	16/17913	0.114046	0.276545	0.211299	DUSP5	1	B1
GO:0036035	osteoclast development	1/135	16/17913	0.114046	0.276545	0.211299	FBXW7	1	B1
GO:0036124	histone H3-K9 trimethylation	1/135	16/17913	0.114046	0.276545	0.211299	LMNA	1	B1
GO:0043174	nucleoside salvage	1/135	16/17913	0.114046	0.276545	0.211299	TYMP	1	B1
GO:0046325	negative regulation of glucose import	1/135	16/17913	0.114046	0.276545	0.211299	SELENOS	1	B1
GO:0048070	regulation of developmental pigmentation	1/135	16/17913	0.114046	0.276545	0.211299	BCL2	1	B1
GO:0051131	chaperone-mediated protein complex assembly	1/135	16/17913	0.114046	0.276545	0.211299	HSPA1A	1	B1
GO:0055012	ventricular cardiac muscle cell differentiation	1/135	16/17913	0.114046	0.276545	0.211299	LMNA	1	B1
GO:0060965	negative regulation of gene silencing by miRNA	1/135	16/17913	0.114046	0.276545	0.211299	NEAT1	1	B1
GO:0071732	cellular response to nitric oxide	1/135	16/17913	0.114046	0.276545	0.211299	CFLAR	1	B1
GO:1902166	negative regulation of intrinsic apoptotic signaling pathway in response to DNA damage by p53 class mediator	1/135	16/17913	0.114046	0.276545	0.211299	BCL2	1	B1
GO:1903019	negative regulation of glycoprotein metabolic process	1/135	16/17913	0.114046	0.276545	0.211299	TMEM59	1	B1
GO:1903541	regulation of exosomal secretion	1/135	16/17913	0.114046	0.276545	0.211299	SDC1	1	B1
GO:0006379	mRNA cleavage	1/135	17/17913	0.120729	0.286674	0.219039	ERN1	1	B1
GO:0010224	response to UV-B	1/135	17/17913	0.120729	0.286674	0.219039	BCL2	1	B1
GO:0042401	cellular biogenic amine biosynthetic process	1/135	17/17913	0.120729	0.286674	0.219039	SAT1	1	B1
GO:0042753	positive regulation of circadian rhythm	1/135	17/17913	0.120729	0.286674	0.219039	RORA	1	B1
GO:0043651	linoleic acid metabolic process	1/135	17/17913	0.120729	0.286674	0.219039	GSTP1	1	B1
GO:0043923	positive regulation by host of viral transcription	1/135	17/17913	0.120729	0.286674	0.219039	JUN	1	B1
GO:0044241	lipid digestion	1/135	17/17913	0.120729	0.286674	0.219039	LDLR	1	B1
GO:0046514	ceramide catabolic process	1/135	17/17913	0.120729	0.286674	0.219039	PSAP	1	B1
GO:0048532	anatomical structure arrangement	1/135	17/17913	0.120729	0.286674	0.219039	HSPA5	1	B1
GO:0050665	hydrogen peroxide biosynthetic process	1/135	17/17913	0.120729	0.286674	0.219039	CYBA	1	B1
GO:0051788	response to misfolded protein	1/135	17/17913	0.120729	0.286674	0.219039	SDF2L1	1	B1
GO:0051969	regulation of transmission of nerve impulse	1/135	17/17913	0.120729	0.286674	0.219039	TYMP	1	B1
GO:0060850	regulation of transcription involved in cell fate commitment	1/135	17/17913	0.120729	0.286674	0.219039	RORA	1	B1
GO:1904380	endoplasmic reticulum mannose trimming	1/135	17/17913	0.120729	0.286674	0.219039	SEL1L	1	B1
GO:0006515	protein quality control for misfolded or incompletely synthesized proteins	1/135	18/17913	0.127362	0.294641	0.225126	SDF2L1	1	B1
GO:0007252	I-kappaB phosphorylation	1/135	18/17913	0.127362	0.294641	0.225126	PRDX4	1	B1
GO:0009309	amine biosynthetic process	1/135	18/17913	0.127362	0.294641	0.225126	SAT1	1	B1
GO:0010888	negative regulation of lipid storage	1/135	18/17913	0.127362	0.294641	0.225126	NFKBIA	1	B1
GO:0021533	cell differentiation in hindbrain	1/135	18/17913	0.127362	0.294641	0.225126	RORA	1	B1
GO:0042276	error-prone translesion synthesis	1/135	18/17913	0.127362	0.294641	0.225126	UBC	1	B1
GO:0044827	modulation by host of viral genome replication	1/135	18/17913	0.127362	0.294641	0.225126	PPIB	1	B1
GO:0070230	positive regulation of lymphocyte apoptotic process	1/135	18/17913	0.127362	0.294641	0.225126	CCL5	1	B1
GO:0071318	cellular response to ATP	1/135	18/17913	0.127362	0.294641	0.225126	HSP90B1	1	B1
GO:0090026	positive regulation of monocyte chemotaxis	1/135	18/17913	0.127362	0.294641	0.225126	CCL5	1	B1
GO:0090196	regulation of chemokine secretion	1/135	18/17913	0.127362	0.294641	0.225126	SELENOK	1	B1
GO:1901739	regulation of myoblast fusion	1/135	18/17913	0.127362	0.294641	0.225126	CFLAR	1	B1
GO:1902165	regulation of intrinsic apoptotic signaling pathway in response to DNA damage by p53 class mediator	1/135	18/17913	0.127362	0.294641	0.225126	BCL2	1	B1
GO:1902176	negative regulation of oxidative stress-induced intrinsic apoptotic signaling pathway	1/135	18/17913	0.127362	0.294641	0.225126	HSPB1	1	B1
GO:0002363	alpha-beta T cell lineage commitment	1/135	19/17913	0.133945	0.298618	0.228164	BCL2	1	B1
GO:0003159	morphogenesis of an endothelium	1/135	19/17913	0.133945	0.298618	0.228164	RHOB	1	B1
GO:0006677	glycosylceramide metabolic process	1/135	19/17913	0.133945	0.298618	0.228164	PSAP	1	B1
GO:0006833	water transport	1/135	19/17913	0.133945	0.298618	0.228164	AQP3	1	B1
GO:0010612	regulation of cardiac muscle adaptation	1/135	19/17913	0.133945	0.298618	0.228164	LMNA	1	B1
GO:0018195	peptidyl-arginine modification	1/135	19/17913	0.133945	0.298618	0.228164	KRTCAP2	1	B1
GO:0032095	regulation of response to food	1/135	19/17913	0.133945	0.298618	0.228164	NUCB2	1	B1
GO:0034104	negative regulation of tissue remodeling	1/135	19/17913	0.133945	0.298618	0.228164	TNFAIP3	1	B1
GO:0046475	glycerophospholipid catabolic process	1/135	19/17913	0.133945	0.298618	0.228164	LDLR	1	B1
GO:0050860	negative regulation of T cell receptor signaling pathway	1/135	19/17913	0.133945	0.298618	0.228164	PHPT1	1	B1
GO:0051412	response to corticosterone	1/135	19/17913	0.133945	0.298618	0.228164	FOSB	1	B1
GO:0060149	negative regulation of posttranscriptional gene silencing	1/135	19/17913	0.133945	0.298618	0.228164	NEAT1	1	B1
GO:0060967	negative regulation of gene silencing by RNA	1/135	19/17913	0.133945	0.298618	0.228164	NEAT1	1	B1
GO:0061154	endothelial tube morphogenesis	1/135	19/17913	0.133945	0.298618	0.228164	RHOB	1	B1
GO:0070987	error-free translesion synthesis	1/135	19/17913	0.133945	0.298618	0.228164	UBC	1	B1
GO:0071243	cellular response to arsenic-containing substance	1/135	19/17913	0.133945	0.298618	0.228164	ATF3	1	B1
GO:0071731	response to nitric oxide	1/135	19/17913	0.133945	0.298618	0.228164	CFLAR	1	B1
GO:0090201	negative regulation of release of cytochrome c from mitochondria	1/135	19/17913	0.133945	0.298618	0.228164	LMNA	1	B1
GO:0140131	positive regulation of lymphocyte chemotaxis	1/135	19/17913	0.133945	0.298618	0.228164	CCL5	1	B1
GO:1902074	response to salt	1/135	19/17913	0.133945	0.298618	0.228164	HSPA5	1	B1
GO:1902170	cellular response to reactive nitrogen species	1/135	19/17913	0.133945	0.298618	0.228164	CFLAR	1	B1
GO:1903242	regulation of cardiac muscle hypertrophy in response to stress	1/135	19/17913	0.133945	0.298618	0.228164	LMNA	1	B1
GO:1905939	regulation of gonad development	1/135	19/17913	0.133945	0.298618	0.228164	CITED2	1	B1
GO:1990182	exosomal secretion	1/135	19/17913	0.133945	0.298618	0.228164	SDC1	1	B1
GO:2000678	negative regulation of transcription regulatory region DNA binding	1/135	19/17913	0.133945	0.298618	0.228164	FBXW7	1	B1
GO:0002320	lymphoid progenitor cell differentiation	1/135	20/17913	0.140479	0.30486	0.232934	BCL2	1	B1
GO:0002438	acute inflammatory response to antigenic stimulus	1/135	20/17913	0.140479	0.30486	0.232934	SELENOS	1	B1
GO:0010042	response to manganese ion	1/135	20/17913	0.140479	0.30486	0.232934	HSPA5	1	B1
GO:0021697	cerebellar cortex formation	1/135	20/17913	0.140479	0.30486	0.232934	RORA	1	B1
GO:0032516	positive regulation of phosphoprotein phosphatase activity	1/135	20/17913	0.140479	0.30486	0.232934	PPP1R15A	1	B1
GO:0032816	positive regulation of natural killer cell activation	1/135	20/17913	0.140479	0.30486	0.232934	GAS6	1	B1
GO:0033194	response to hydroperoxide	1/135	20/17913	0.140479	0.30486	0.232934	TP53INP1	1	B1
GO:0033630	positive regulation of cell adhesion mediated by integrin	1/135	20/17913	0.140479	0.30486	0.232934	CCL5	1	B1
GO:0035357	peroxisome proliferator activated receptor signaling pathway	1/135	20/17913	0.140479	0.30486	0.232934	CITED2	1	B1
GO:0035929	steroid hormone secretion	1/135	20/17913	0.140479	0.30486	0.232934	SELENOM	1	B1
GO:0043031	negative regulation of macrophage activation	1/135	20/17913	0.140479	0.30486	0.232934	LDLR	1	B1
GO:0043369	CD4-positive or CD8-positive, alpha-beta T cell lineage commitment	1/135	20/17913	0.140479	0.30486	0.232934	BCL2	1	B1
GO:0044331	cell-cell adhesion mediated by cadherin	1/135	20/17913	0.140479	0.30486	0.232934	RGCC	1	B1
GO:0045655	regulation of monocyte differentiation	1/135	20/17913	0.140479	0.30486	0.232934	JUN	1	B1
GO:0090195	chemokine secretion	1/135	20/17913	0.140479	0.30486	0.232934	SELENOK	1	B1
GO:0097734	extracellular exosome biogenesis	1/135	20/17913	0.140479	0.30486	0.232934	SDC1	1	B1
GO:1900424	regulation of defense response to bacterium	1/135	20/17913	0.140479	0.30486	0.232934	CYBA	1	B1
GO:1905523	positive regulation of macrophage migration	1/135	20/17913	0.140479	0.30486	0.232934	CCL5	1	B1
GO:0003351	epithelial cilium movement	1/135	21/17913	0.146964	0.311896	0.238309	DNAAF1	1	B1
GO:0006085	acetyl-CoA biosynthetic process	1/135	21/17913	0.146964	0.311896	0.238309	PDK1	1	B1
GO:0010829	negative regulation of glucose transmembrane transport	1/135	21/17913	0.146964	0.311896	0.238309	SELENOS	1	B1
GO:0017000	antibiotic biosynthetic process	1/135	21/17913	0.146964	0.311896	0.238309	CYBA	1	B1
GO:0032373	positive regulation of sterol transport	1/135	21/17913	0.146964	0.311896	0.238309	NFKBIA	1	B1
GO:0032376	positive regulation of cholesterol transport	1/135	21/17913	0.146964	0.311896	0.238309	NFKBIA	1	B1
GO:0035455	response to interferon-alpha	1/135	21/17913	0.146964	0.311896	0.238309	GAS6	1	B1
GO:0036507	protein demannosylation	1/135	21/17913	0.146964	0.311896	0.238309	SEL1L	1	B1
GO:0036508	protein alpha-1,2-demannosylation	1/135	21/17913	0.146964	0.311896	0.238309	SEL1L	1	B1
GO:0042402	cellular biogenic amine catabolic process	1/135	21/17913	0.146964	0.311896	0.238309	SAT1	1	B1
GO:0044458	motile cilium assembly	1/135	21/17913	0.146964	0.311896	0.238309	DNAAF1	1	B1
GO:0046827	positive regulation of protein export from nucleus	1/135	21/17913	0.146964	0.311896	0.238309	GAS6	1	B1
GO:0051900	regulation of mitochondrial depolarization	1/135	21/17913	0.146964	0.311896	0.238309	BCL2	1	B1
GO:0060008	Sertoli cell differentiation	1/135	21/17913	0.146964	0.311896	0.238309	SDC1	1	B1
GO:0060575	intestinal epithelial cell differentiation	1/135	21/17913	0.146964	0.311896	0.238309	PRDM1	1	B1
GO:0072111	cell proliferation involved in kidney development	1/135	21/17913	0.146964	0.311896	0.238309	CFLAR	1	B1
GO:0090208	positive regulation of triglyceride metabolic process	1/135	21/17913	0.146964	0.311896	0.238309	LDLR	1	B1
GO:1903010	regulation of bone development	1/135	21/17913	0.146964	0.311896	0.238309	FBXW7	1	B1
GO:2000104	negative regulation of DNA-dependent DNA replication	1/135	21/17913	0.146964	0.311896	0.238309	FBXW7	1	B1
GO:2000144	positive regulation of DNA-templated transcription, initiation	1/135	21/17913	0.146964	0.311896	0.238309	JUN	1	B1
GO:2000269	regulation of fibroblast apoptotic process	1/135	21/17913	0.146964	0.311896	0.238309	GAS6	1	B1
GO:0000715	nucleotide-excision repair, DNA damage recognition	1/135	22/17913	0.1534	0.317785	0.242809	UBC	1	B1
GO:0000717	nucleotide-excision repair, DNA duplex unwinding	1/135	22/17913	0.1534	0.317785	0.242809	UBC	1	B1
GO:0006582	melanin metabolic process	1/135	22/17913	0.1534	0.317785	0.242809	BCL2	1	B1
GO:0007398	ectoderm development	1/135	22/17913	0.1534	0.317785	0.242809	ITGA6	1	B1
GO:0018126	protein hydroxylation	1/135	22/17913	0.1534	0.317785	0.242809	P4HB	1	B1
GO:0030318	melanocyte differentiation	1/135	22/17913	0.1534	0.317785	0.242809	BCL2	1	B1
GO:0032682	negative regulation of chemokine production	1/135	22/17913	0.1534	0.317785	0.242809	GSTP1	1	B1
GO:0033622	integrin activation	1/135	22/17913	0.1534	0.317785	0.242809	MZB1	1	B1
GO:0036037	CD8-positive, alpha-beta T cell activation	1/135	22/17913	0.1534	0.317785	0.242809	BCL2	1	B1
GO:0045649	regulation of macrophage differentiation	1/135	22/17913	0.1534	0.317785	0.242809	TRIB1	1	B1
GO:0051220	cytoplasmic sequestering of protein	1/135	22/17913	0.1534	0.317785	0.242809	NFKBIA	1	B1
GO:0051350	negative regulation of lyase activity	1/135	22/17913	0.1534	0.317785	0.242809	PHPT1	1	B1
GO:0090343	positive regulation of cell aging	1/135	22/17913	0.1534	0.317785	0.242809	LMNA	1	B1
GO:0140112	extracellular vesicle biogenesis	1/135	22/17913	0.1534	0.317785	0.242809	SDC1	1	B1
GO:0150079	negative regulation of neuroinflammatory response	1/135	22/17913	0.1534	0.317785	0.242809	LDLR	1	B1
GO:1901522	positive regulation of transcription from RNA polymerase II promoter involved in cellular response to chemical stimulus	1/135	22/17913	0.1534	0.317785	0.242809	XBP1	1	B1
GO:1901685	glutathione derivative metabolic process	1/135	22/17913	0.1534	0.317785	0.242809	GSTP1	1	B1
GO:1901687	glutathione derivative biosynthetic process	1/135	22/17913	0.1534	0.317785	0.242809	GSTP1	1	B1
GO:1903077	negative regulation of protein localization to plasma membrane	1/135	22/17913	0.1534	0.317785	0.242809	TMEM59	1	B1
GO:1903429	regulation of cell maturation	1/135	22/17913	0.1534	0.317785	0.242809	BCL2	1	B1
GO:0006297	nucleotide-excision repair, DNA gap filling	1/135	23/17913	0.159788	0.323823	0.247422	UBC	1	B1
GO:0007141	male meiosis I	1/135	23/17913	0.159788	0.323823	0.247422	MEI1	1	B1
GO:0007530	sex determination	1/135	23/17913	0.159788	0.323823	0.247422	CITED2	1	B1
GO:0009310	amine catabolic process	1/135	23/17913	0.159788	0.323823	0.247422	SAT1	1	B1
GO:0010758	regulation of macrophage chemotaxis	1/135	23/17913	0.159788	0.323823	0.247422	CCL5	1	B1
GO:0032098	regulation of appetite	1/135	23/17913	0.159788	0.323823	0.247422	NUCB2	1	B1
GO:0032703	negative regulation of interleukin-2 production	1/135	23/17913	0.159788	0.323823	0.247422	TNFAIP3	1	B1
GO:0051570	regulation of histone H3-K9 methylation	1/135	23/17913	0.159788	0.323823	0.247422	LMNA	1	B1
GO:0051882	mitochondrial depolarization	1/135	23/17913	0.159788	0.323823	0.247422	BCL2	1	B1
GO:0071404	cellular response to low-density lipoprotein particle stimulus	1/135	23/17913	0.159788	0.323823	0.247422	LDLR	1	B1
GO:0071677	positive regulation of mononuclear cell migration	1/135	23/17913	0.159788	0.323823	0.247422	CCL5	1	B1
GO:0072666	establishment of protein localization to vacuole	1/135	23/17913	0.159788	0.323823	0.247422	TNFAIP3	1	B1
GO:1900746	regulation of vascular endothelial growth factor signaling pathway	1/135	23/17913	0.159788	0.323823	0.247422	CD63	1	B1
GO:1902003	regulation of amyloid-beta formation	1/135	23/17913	0.159788	0.323823	0.247422	TMED10	1	B1
GO:1902254	negative regulation of intrinsic apoptotic signaling pathway by p53 class mediator	1/135	23/17913	0.159788	0.323823	0.247422	BCL2	1	B1
GO:0002092	positive regulation of receptor internalization	1/135	24/17913	0.166129	0.329768	0.251965	CD63	1	B1
GO:0002861	regulation of inflammatory response to antigenic stimulus	1/135	24/17913	0.166129	0.329768	0.251965	SELENOS	1	B1
GO:0030325	adrenal gland development	1/135	24/17913	0.166129	0.329768	0.251965	CITED2	1	B1
GO:0031069	hair follicle morphogenesis	1/135	24/17913	0.166129	0.329768	0.251965	BCL2	1	B1
GO:0033119	negative regulation of RNA splicing	1/135	24/17913	0.166129	0.329768	0.251965	TMBIM6	1	B1
GO:0036315	cellular response to sterol	1/135	24/17913	0.166129	0.329768	0.251965	RORA	1	B1
GO:0044346	fibroblast apoptotic process	1/135	24/17913	0.166129	0.329768	0.251965	GAS6	1	B1
GO:0046135	pyrimidine nucleoside catabolic process	1/135	24/17913	0.166129	0.329768	0.251965	TYMP	1	B1
GO:0048143	astrocyte activation	1/135	24/17913	0.166129	0.329768	0.251965	LDLR	1	B1
GO:0048643	positive regulation of skeletal muscle tissue development	1/135	24/17913	0.166129	0.329768	0.251965	BCL2	1	B1
GO:0048753	pigment granule organization	1/135	24/17913	0.166129	0.329768	0.251965	BCL2	1	B1
GO:0072012	glomerulus vasculature development	1/135	24/17913	0.166129	0.329768	0.251965	CFLAR	1	B1
GO:1901032	negative regulation of response to reactive oxygen species	1/135	24/17913	0.166129	0.329768	0.251965	PSAP	1	B1
GO:1902547	regulation of cellular response to vascular endothelial growth factor stimulus	1/135	24/17913	0.166129	0.329768	0.251965	CD63	1	B1
GO:1903206	negative regulation of hydrogen peroxide-induced cell death	1/135	24/17913	0.166129	0.329768	0.251965	PSAP	1	B1
GO:1904376	negative regulation of protein localization to cell periphery	1/135	24/17913	0.166129	0.329768	0.251965	TMEM59	1	B1
GO:2001026	regulation of endothelial cell chemotaxis	1/135	24/17913	0.166129	0.329768	0.251965	HSPB1	1	B1
GO:2001039	negative regulation of cellular response to drug	1/135	24/17913	0.166129	0.329768	0.251965	PSAP	1	B1
GO:0006517	protein deglycosylation	1/135	25/17913	0.172422	0.336684	0.257249	SEL1L	1	B1
GO:0007176	regulation of epidermal growth factor-activated receptor activity	1/135	25/17913	0.172422	0.336684	0.257249	FBXW7	1	B1
GO:0010818	T cell chemotaxis	1/135	25/17913	0.172422	0.336684	0.257249	CCL5	1	B1
GO:0032104	regulation of response to extracellular stimulus	1/135	25/17913	0.172422	0.336684	0.257249	NUCB2	1	B1
GO:0032107	regulation of response to nutrient levels	1/135	25/17913	0.172422	0.336684	0.257249	NUCB2	1	B1
GO:0032461	positive regulation of protein oligomerization	1/135	25/17913	0.172422	0.336684	0.257249	JCHAIN	1	B1
GO:0070286	axonemal dynein complex assembly	1/135	25/17913	0.172422	0.336684	0.257249	DNAAF1	1	B1
GO:0090025	regulation of monocyte chemotaxis	1/135	25/17913	0.172422	0.336684	0.257249	CCL5	1	B1
GO:1900739	regulation of protein insertion into mitochondrial membrane involved in apoptotic signaling pathway	1/135	25/17913	0.172422	0.336684	0.257249	BCL2	1	B1
GO:1900740	positive regulation of protein insertion into mitochondrial membrane involved in apoptotic signaling pathway	1/135	25/17913	0.172422	0.336684	0.257249	BCL2	1	B1
GO:1901623	regulation of lymphocyte chemotaxis	1/135	25/17913	0.172422	0.336684	0.257249	CCL5	1	B1
GO:1904385	cellular response to angiotensin	1/135	25/17913	0.172422	0.336684	0.257249	CYBA	1	B1
GO:2000353	positive regulation of endothelial cell apoptotic process	1/135	25/17913	0.172422	0.336684	0.257249	RGCC	1	B1
GO:0002230	positive regulation of defense response to virus by host	1/135	26/17913	0.178667	0.341722	0.261098	SELENOK	1	B1
GO:0002360	T cell lineage commitment	1/135	26/17913	0.178667	0.341722	0.261098	BCL2	1	B1
GO:0002507	tolerance induction	1/135	26/17913	0.178667	0.341722	0.261098	TNFAIP3	1	B1
GO:0017004	cytochrome complex assembly	1/135	26/17913	0.178667	0.341722	0.261098	CYBA	1	B1
GO:0030149	sphingolipid catabolic process	1/135	26/17913	0.178667	0.341722	0.261098	PSAP	1	B1
GO:0030206	chondroitin sulfate biosynthetic process	1/135	26/17913	0.178667	0.341722	0.261098	CHPF	1	B1
GO:0032967	positive regulation of collagen biosynthetic process	1/135	26/17913	0.178667	0.341722	0.261098	RGCC	1	B1
GO:0034377	plasma lipoprotein particle assembly	1/135	26/17913	0.178667	0.341722	0.261098	P4HB	1	B1
GO:0042044	fluid transport	1/135	26/17913	0.178667	0.341722	0.261098	AQP3	1	B1
GO:0043501	skeletal muscle adaptation	1/135	26/17913	0.178667	0.341722	0.261098	CFLAR	1	B1
GO:0060142	regulation of syncytium formation by plasma membrane fusion	1/135	26/17913	0.178667	0.341722	0.261098	CFLAR	1	B1
GO:0060632	regulation of microtubule-based movement	1/135	26/17913	0.178667	0.341722	0.261098	DNAAF1	1	B1
GO:0060706	cell differentiation involved in embryonic placenta development	1/135	26/17913	0.178667	0.341722	0.261098	PRDM1	1	B1
GO:0060969	negative regulation of gene silencing	1/135	26/17913	0.178667	0.341722	0.261098	NEAT1	1	B1
GO:0061437	renal system vasculature development	1/135	26/17913	0.178667	0.341722	0.261098	CFLAR	1	B1
GO:0061440	kidney vasculature development	1/135	26/17913	0.178667	0.341722	0.261098	CFLAR	1	B1
GO:0070168	negative regulation of biomineral tissue development	1/135	26/17913	0.178667	0.341722	0.261098	GAS6	1	B1
GO:0070911	global genome nucleotide-excision repair	1/135	26/17913	0.178667	0.341722	0.261098	UBC	1	B1
GO:0072539	T-helper 17 cell differentiation	1/135	26/17913	0.178667	0.341722	0.261098	RORA	1	B1
GO:0003081	regulation of systemic arterial blood pressure by renin-angiotensin	1/135	27/17913	0.184866	0.349593	0.267113	CYBA	1	B1
GO:0009112	nucleobase metabolic process	1/135	27/17913	0.184866	0.349593	0.267113	TYMP	1	B1
GO:0010714	positive regulation of collagen metabolic process	1/135	27/17913	0.184866	0.349593	0.267113	RGCC	1	B1
GO:0044788	modulation by host of viral process	1/135	27/17913	0.184866	0.349593	0.267113	PPIB	1	B1
GO:0045671	negative regulation of osteoclast differentiation	1/135	27/17913	0.184866	0.349593	0.267113	FBXW7	1	B1
GO:0045686	negative regulation of glial cell differentiation	1/135	27/17913	0.184866	0.349593	0.267113	LDLR	1	B1
GO:0046839	phospholipid dephosphorylation	1/135	27/17913	0.184866	0.349593	0.267113	PLPP5	1	B1
GO:0050858	negative regulation of antigen receptor-mediated signaling pathway	1/135	27/17913	0.184866	0.349593	0.267113	PHPT1	1	B1
GO:0000002	mitochondrial genome maintenance	1/135	28/17913	0.191019	0.355354	0.271515	TYMP	1	B1
GO:0005979	regulation of glycogen biosynthetic process	1/135	28/17913	0.191019	0.355354	0.271515	SELENOS	1	B1
GO:0010458	exit from mitosis	1/135	28/17913	0.191019	0.355354	0.271515	RGCC	1	B1
GO:0010962	regulation of glucan biosynthetic process	1/135	28/17913	0.191019	0.355354	0.271515	SELENOS	1	B1
GO:0018345	protein palmitoylation	1/135	28/17913	0.191019	0.355354	0.271515	SELENOK	1	B1
GO:0021884	forebrain neuron development	1/135	28/17913	0.191019	0.355354	0.271515	ATF5	1	B1
GO:0030511	positive regulation of transforming growth factor beta receptor signaling pathway	1/135	28/17913	0.191019	0.355354	0.271515	CITED2	1	B1
GO:0033688	regulation of osteoblast proliferation	1/135	28/17913	0.191019	0.355354	0.271515	BCL2	1	B1
GO:0042533	tumor necrosis factor biosynthetic process	1/135	28/17913	0.191019	0.355354	0.271515	HSPB1	1	B1
GO:0042534	regulation of tumor necrosis factor biosynthetic process	1/135	28/17913	0.191019	0.355354	0.271515	HSPB1	1	B1
GO:0045737	positive regulation of cyclin-dependent protein serine/threonine kinase activity	1/135	28/17913	0.191019	0.355354	0.271515	RGCC	1	B1
GO:0048730	epidermis morphogenesis	1/135	28/17913	0.191019	0.355354	0.271515	BCL2	1	B1
GO:0048741	skeletal muscle fiber development	1/135	28/17913	0.191019	0.355354	0.271515	BCL2	1	B1
GO:0050869	negative regulation of B cell activation	1/135	28/17913	0.191019	0.355354	0.271515	TNFAIP3	1	B1
GO:0051443	positive regulation of ubiquitin-protein transferase activity	1/135	28/17913	0.191019	0.355354	0.271515	FBXW7	1	B1
GO:1903846	positive regulation of cellular response to transforming growth factor beta stimulus	1/135	28/17913	0.191019	0.355354	0.271515	CITED2	1	B1
GO:1990776	response to angiotensin	1/135	28/17913	0.191019	0.355354	0.271515	CYBA	1	B1
GO:2000108	positive regulation of leukocyte apoptotic process	1/135	28/17913	0.191019	0.355354	0.271515	CCL5	1	B1
GO:0001844	protein insertion into mitochondrial membrane involved in apoptotic signaling pathway	1/135	29/17913	0.197125	0.362693	0.277122	BCL2	1	B1
GO:0006294	nucleotide-excision repair, preincision complex assembly	1/135	29/17913	0.197125	0.362693	0.277122	UBC	1	B1
GO:0010575	positive regulation of vascular endothelial growth factor production	1/135	29/17913	0.197125	0.362693	0.277122	RORA	1	B1
GO:0021696	cerebellar cortex morphogenesis	1/135	29/17913	0.197125	0.362693	0.277122	RORA	1	B1
GO:0034205	amyloid-beta formation	1/135	29/17913	0.197125	0.362693	0.277122	TMED10	1	B1
GO:0035666	TRIF-dependent toll-like receptor signaling pathway	1/135	29/17913	0.197125	0.362693	0.277122	UBC	1	B1
GO:0046134	pyrimidine nucleoside biosynthetic process	1/135	29/17913	0.197125	0.362693	0.277122	TYMP	1	B1
GO:0048873	homeostasis of number of cells within a tissue	1/135	29/17913	0.197125	0.362693	0.277122	BCL2	1	B1
GO:0050650	chondroitin sulfate proteoglycan biosynthetic process	1/135	29/17913	0.197125	0.362693	0.277122	CHPF	1	B1
GO:0071549	cellular response to dexamethasone stimulus	1/135	29/17913	0.197125	0.362693	0.277122	CFLAR	1	B1
GO:0072538	T-helper 17 type immune response	1/135	29/17913	0.197125	0.362693	0.277122	RORA	1	B1
GO:0010743	regulation of macrophage derived foam cell differentiation	1/135	30/17913	0.203186	0.370057	0.282748	NFKBIA	1	B1
GO:0021772	olfactory bulb development	1/135	30/17913	0.203186	0.370057	0.282748	ATF5	1	B1
GO:0032689	negative regulation of interferon-gamma production	1/135	30/17913	0.203186	0.370057	0.282748	GAS6	1	B1
GO:0061082	myeloid leukocyte cytokine production	1/135	30/17913	0.203186	0.370057	0.282748	GAS6	1	B1
GO:0065005	protein-lipid complex assembly	1/135	30/17913	0.203186	0.370057	0.282748	P4HB	1	B1
GO:0071108	protein K48-linked deubiquitination	1/135	30/17913	0.203186	0.370057	0.282748	TNFAIP3	1	B1
GO:0090659	walking behavior	1/135	30/17913	0.203186	0.370057	0.282748	PSAP	1	B1
GO:1902895	positive regulation of pri-miRNA transcription by RNA polymerase II	1/135	30/17913	0.203186	0.370057	0.282748	JUN	1	B1
GO:1902991	regulation of amyloid precursor protein catabolic process	1/135	30/17913	0.203186	0.370057	0.282748	TMED10	1	B1
GO:1905476	negative regulation of protein localization to membrane	1/135	30/17913	0.203186	0.370057	0.282748	TMEM59	1	B1
GO:2000142	regulation of DNA-templated transcription, initiation	1/135	30/17913	0.203186	0.370057	0.282748	JUN	1	B1
GO:0014904	myotube cell development	1/135	31/17913	0.209201	0.375278	0.286738	BCL2	1	B1
GO:0021988	olfactory lobe development	1/135	31/17913	0.209201	0.375278	0.286738	ATF5	1	B1
GO:0033198	response to ATP	1/135	31/17913	0.209201	0.375278	0.286738	HSP90B1	1	B1
GO:0033687	osteoblast proliferation	1/135	31/17913	0.209201	0.375278	0.286738	BCL2	1	B1
GO:0035767	endothelial cell chemotaxis	1/135	31/17913	0.209201	0.375278	0.286738	HSPB1	1	B1
GO:0035774	positive regulation of insulin secretion involved in cellular response to glucose stimulus	1/135	31/17913	0.209201	0.375278	0.286738	PHPT1	1	B1
GO:0043330	response to exogenous dsRNA	1/135	31/17913	0.209201	0.375278	0.286738	NFKBIA	1	B1
GO:0045742	positive regulation of epidermal growth factor receptor signaling pathway	1/135	31/17913	0.209201	0.375278	0.286738	FBXW7	1	B1
GO:0046466	membrane lipid catabolic process	1/135	31/17913	0.209201	0.375278	0.286738	PSAP	1	B1
GO:0051204	protein insertion into mitochondrial membrane	1/135	31/17913	0.209201	0.375278	0.286738	BCL2	1	B1
GO:1902230	negative regulation of intrinsic apoptotic signaling pathway in response to DNA damage	1/135	31/17913	0.209201	0.375278	0.286738	BCL2	1	B1
GO:1902253	regulation of intrinsic apoptotic signaling pathway by p53 class mediator	1/135	31/17913	0.209201	0.375278	0.286738	BCL2	1	B1
GO:1903205	regulation of hydrogen peroxide-induced cell death	1/135	31/17913	0.209201	0.375278	0.286738	PSAP	1	B1
GO:1903978	regulation of microglial cell activation	1/135	31/17913	0.209201	0.375278	0.286738	LDLR	1	B1
GO:0003299	muscle hypertrophy in response to stress	1/135	32/17913	0.215171	0.380594	0.2908	LMNA	1	B1
GO:0009164	nucleoside catabolic process	1/135	32/17913	0.215171	0.380594	0.2908	TYMP	1	B1
GO:0014887	cardiac muscle adaptation	1/135	32/17913	0.215171	0.380594	0.2908	LMNA	1	B1
GO:0014898	cardiac muscle hypertrophy in response to stress	1/135	32/17913	0.215171	0.380594	0.2908	LMNA	1	B1
GO:0030851	granulocyte differentiation	1/135	32/17913	0.215171	0.380594	0.2908	TRIB1	1	B1
GO:0043368	positive T cell selection	1/135	32/17913	0.215171	0.380594	0.2908	BCL2	1	B1
GO:0046685	response to arsenic-containing substance	1/135	32/17913	0.215171	0.380594	0.2908	ATF3	1	B1
GO:0071276	cellular response to cadmium ion	1/135	32/17913	0.215171	0.380594	0.2908	JUN	1	B1
GO:0071295	cellular response to vitamin	1/135	32/17913	0.215171	0.380594	0.2908	GAS6	1	B1
GO:0071709	membrane assembly	1/135	32/17913	0.215171	0.380594	0.2908	PSAP	1	B1
GO:1903955	positive regulation of protein targeting to mitochondrion	1/135	32/17913	0.215171	0.380594	0.2908	FBXW7	1	B1
GO:1904031	positive regulation of cyclin-dependent protein kinase activity	1/135	32/17913	0.215171	0.380594	0.2908	RGCC	1	B1
GO:0002756	MyD88-independent toll-like receptor signaling pathway	1/135	33/17913	0.221096	0.384323	0.293649	UBC	1	B1
GO:0006084	acetyl-CoA metabolic process	1/135	33/17913	0.221096	0.384323	0.293649	PDK1	1	B1
GO:0007616	long-term memory	1/135	33/17913	0.221096	0.384323	0.293649	LDLR	1	B1
GO:0010039	response to iron ion	1/135	33/17913	0.221096	0.384323	0.293649	BCL2	1	B1
GO:0010922	positive regulation of phosphatase activity	1/135	33/17913	0.221096	0.384323	0.293649	PPP1R15A	1	B1
GO:0032094	response to food	1/135	33/17913	0.221096	0.384323	0.293649	NUCB2	1	B1
GO:0036314	response to sterol	1/135	33/17913	0.221096	0.384323	0.293649	RORA	1	B1
GO:0042462	eye photoreceptor cell development	1/135	33/17913	0.221096	0.384323	0.293649	PRDM1	1	B1
GO:0043094	cellular metabolic compound salvage	1/135	33/17913	0.221096	0.384323	0.293649	TYMP	1	B1
GO:0045736	negative regulation of cyclin-dependent protein serine/threonine kinase activity	1/135	33/17913	0.221096	0.384323	0.293649	TNFAIP3	1	B1
GO:0055094	response to lipoprotein particle	1/135	33/17913	0.221096	0.384323	0.293649	LDLR	1	B1
GO:0070873	regulation of glycogen metabolic process	1/135	33/17913	0.221096	0.384323	0.293649	SELENOS	1	B1
GO:0097242	amyloid-beta clearance	1/135	33/17913	0.221096	0.384323	0.293649	LDLR	1	B1
GO:0098751	bone cell development	1/135	33/17913	0.221096	0.384323	0.293649	FBXW7	1	B1
GO:1901186	positive regulation of ERBB signaling pathway	1/135	33/17913	0.221096	0.384323	0.293649	FBXW7	1	B1
GO:1901797	negative regulation of signal transduction by p53 class mediator	1/135	33/17913	0.221096	0.384323	0.293649	BCL2	1	B1
GO:0010464	regulation of mesenchymal cell proliferation	1/135	34/17913	0.226977	0.389967	0.297961	LMNA	1	B1
GO:0010574	regulation of vascular endothelial growth factor production	1/135	34/17913	0.226977	0.389967	0.297961	RORA	1	B1
GO:0014072	response to isoquinoline alkaloid	1/135	34/17913	0.226977	0.389967	0.297961	FOSB	1	B1
GO:0032148	activation of protein kinase B activity	1/135	34/17913	0.226977	0.389967	0.297961	GAS6	1	B1
GO:0043278	response to morphine	1/135	34/17913	0.226977	0.389967	0.297961	FOSB	1	B1
GO:0045777	positive regulation of blood pressure	1/135	34/17913	0.226977	0.389967	0.297961	CYBA	1	B1
GO:0071392	cellular response to estradiol stimulus	1/135	34/17913	0.226977	0.389967	0.297961	CFLAR	1	B1
GO:0072595	maintenance of protein localization in organelle	1/135	34/17913	0.226977	0.389967	0.297961	HSPA5	1	B1
GO:1901030	positive regulation of mitochondrial outer membrane permeabilization involved in apoptotic signaling pathway	1/135	34/17913	0.226977	0.389967	0.297961	BCL2	1	B1
GO:1901385	regulation of voltage-gated calcium channel activity	1/135	34/17913	0.226977	0.389967	0.297961	AHNAK	1	B1
GO:1904030	negative regulation of cyclin-dependent protein kinase activity	1/135	34/17913	0.226977	0.389967	0.297961	TNFAIP3	1	B1
GO:2000249	regulation of actin cytoskeleton reorganization	1/135	34/17913	0.226977	0.389967	0.297961	PHPT1	1	B1
GO:2001024	negative regulation of response to drug	1/135	34/17913	0.226977	0.389967	0.297961	PSAP	1	B1
GO:2001038	regulation of cellular response to drug	1/135	34/17913	0.226977	0.389967	0.297961	PSAP	1	B1
GO:0001893	maternal placenta development	1/135	35/17913	0.232814	0.394609	0.301508	PRDM1	1	B1
GO:0002701	negative regulation of production of molecular mediator of immune response	1/135	35/17913	0.232814	0.394609	0.301508	TMBIM6	1	B1
GO:0007257	activation of JUN kinase activity	1/135	35/17913	0.232814	0.394609	0.301508	ERN1	1	B1
GO:0009395	phospholipid catabolic process	1/135	35/17913	0.232814	0.394609	0.301508	LDLR	1	B1
GO:0010831	positive regulation of myotube differentiation	1/135	35/17913	0.232814	0.394609	0.301508	BCL2	1	B1
GO:0030224	monocyte differentiation	1/135	35/17913	0.232814	0.394609	0.301508	JUN	1	B1
GO:0036474	cell death in response to hydrogen peroxide	1/135	35/17913	0.232814	0.394609	0.301508	PSAP	1	B1
GO:0045740	positive regulation of DNA replication	1/135	35/17913	0.232814	0.394609	0.301508	JUN	1	B1
GO:0048246	macrophage chemotaxis	1/135	35/17913	0.232814	0.394609	0.301508	CCL5	1	B1
GO:0048710	regulation of astrocyte differentiation	1/135	35/17913	0.232814	0.394609	0.301508	LDLR	1	B1
GO:0050716	positive regulation of interleukin-1 secretion	1/135	35/17913	0.232814	0.394609	0.301508	IGHD	1	B1
GO:0065002	intracellular protein transmembrane transport	1/135	35/17913	0.232814	0.394609	0.301508	HSPA5	1	B1
GO:0071402	cellular response to lipoprotein particle stimulus	1/135	35/17913	0.232814	0.394609	0.301508	LDLR	1	B1
GO:0072529	pyrimidine-containing compound catabolic process	1/135	35/17913	0.232814	0.394609	0.301508	TYMP	1	B1
GO:1901998	toxin transport	1/135	35/17913	0.232814	0.394609	0.301508	HSPA5	1	B1
GO:1903131	mononuclear cell differentiation	1/135	35/17913	0.232814	0.394609	0.301508	JUN	1	B1
GO:0002755	MyD88-dependent toll-like receptor signaling pathway	1/135	36/17913	0.238608	0.39985	0.305513	UBC	1	B1
GO:0003091	renal water homeostasis	1/135	36/17913	0.238608	0.39985	0.305513	AQP3	1	B1
GO:0003156	regulation of animal organ formation	1/135	36/17913	0.238608	0.39985	0.305513	CITED2	1	B1
GO:0008156	negative regulation of DNA replication	1/135	36/17913	0.238608	0.39985	0.305513	FBXW7	1	B1
GO:0009187	cyclic nucleotide metabolic process	1/135	36/17913	0.238608	0.39985	0.305513	RORA	1	B1
GO:0010573	vascular endothelial growth factor production	1/135	36/17913	0.238608	0.39985	0.305513	RORA	1	B1
GO:0032885	regulation of polysaccharide biosynthetic process	1/135	36/17913	0.238608	0.39985	0.305513	SELENOS	1	B1
GO:0044058	regulation of digestive system process	1/135	36/17913	0.238608	0.39985	0.305513	TYMP	1	B1
GO:0046825	regulation of protein export from nucleus	1/135	36/17913	0.238608	0.39985	0.305513	GAS6	1	B1
GO:0048255	mRNA stabilization	1/135	36/17913	0.238608	0.39985	0.305513	TENT5C	1	B1
GO:0050892	intestinal absorption	1/135	36/17913	0.238608	0.39985	0.305513	LDLR	1	B1
GO:1905521	regulation of macrophage migration	1/135	36/17913	0.238608	0.39985	0.305513	CCL5	1	B1
GO:0001662	behavioral fear response	1/135	37/17913	0.244357	0.403839	0.30856	BCL2	1	B1
GO:0001990	regulation of systemic arterial blood pressure by hormone	1/135	37/17913	0.244357	0.403839	0.30856	CYBA	1	B1
GO:0003009	skeletal muscle contraction	1/135	37/17913	0.244357	0.403839	0.30856	JSRP1	1	B1
GO:0006296	nucleotide-excision repair, DNA incision, 5'-to lesion	1/135	37/17913	0.244357	0.403839	0.30856	UBC	1	B1
GO:0010614	negative regulation of cardiac muscle hypertrophy	1/135	37/17913	0.244357	0.403839	0.30856	LMNA	1	B1
GO:0010955	negative regulation of protein processing	1/135	37/17913	0.244357	0.403839	0.30856	TMEM59	1	B1
GO:0034405	response to fluid shear stress	1/135	37/17913	0.244357	0.403839	0.30856	CITED2	1	B1
GO:0043029	T cell homeostasis	1/135	37/17913	0.244357	0.403839	0.30856	BCL2	1	B1
GO:0044091	membrane biogenesis	1/135	37/17913	0.244357	0.403839	0.30856	PSAP	1	B1
GO:0045124	regulation of bone resorption	1/135	37/17913	0.244357	0.403839	0.30856	TNFAIP3	1	B1
GO:0051567	histone H3-K9 methylation	1/135	37/17913	0.244357	0.403839	0.30856	LMNA	1	B1
GO:0072665	protein localization to vacuole	1/135	37/17913	0.244357	0.403839	0.30856	TNFAIP3	1	B1
GO:1903318	negative regulation of protein maturation	1/135	37/17913	0.244357	0.403839	0.30856	TMEM59	1	B1
GO:1903427	negative regulation of reactive oxygen species biosynthetic process	1/135	37/17913	0.244357	0.403839	0.30856	CFLAR	1	B1
GO:0002209	behavioral defense response	1/135	38/17913	0.250064	0.407914	0.311674	BCL2	1	B1
GO:0007431	salivary gland development	1/135	38/17913	0.250064	0.407914	0.311674	XBP1	1	B1
GO:0007520	myoblast fusion	1/135	38/17913	0.250064	0.407914	0.311674	CFLAR	1	B1
GO:0010667	negative regulation of cardiac muscle cell apoptotic process	1/135	38/17913	0.250064	0.407914	0.311674	CFLAR	1	B1
GO:0019068	virion assembly	1/135	38/17913	0.250064	0.407914	0.311674	UBC	1	B1
GO:0032008	positive regulation of TOR signaling	1/135	38/17913	0.250064	0.407914	0.311674	GAS6	1	B1
GO:0032941	secretion by tissue	1/135	38/17913	0.250064	0.407914	0.311674	CYBA	1	B1
GO:0033280	response to vitamin D	1/135	38/17913	0.250064	0.407914	0.311674	AQP3	1	B1
GO:0042769	DNA damage response, detection of DNA damage	1/135	38/17913	0.250064	0.407914	0.311674	UBC	1	B1
GO:0043277	apoptotic cell clearance	1/135	38/17913	0.250064	0.407914	0.311674	GAS6	1	B1
GO:0046329	negative regulation of JNK cascade	1/135	38/17913	0.250064	0.407914	0.311674	GSTP1	1	B1
GO:0050856	regulation of T cell receptor signaling pathway	1/135	38/17913	0.250064	0.407914	0.311674	PHPT1	1	B1
GO:1901658	glycosyl compound catabolic process	1/135	38/17913	0.250064	0.407914	0.311674	TYMP	1	B1
GO:1904037	positive regulation of epithelial cell apoptotic process	1/135	38/17913	0.250064	0.407914	0.311674	RGCC	1	B1
GO:0010874	regulation of cholesterol efflux	1/135	39/17913	0.255728	0.413137	0.315664	NFKBIA	1	B1
GO:0014741	negative regulation of muscle hypertrophy	1/135	39/17913	0.255728	0.413137	0.315664	LMNA	1	B1
GO:0030049	muscle filament sliding	1/135	39/17913	0.255728	0.413137	0.315664	TPM4	1	B1
GO:0030204	chondroitin sulfate metabolic process	1/135	39/17913	0.255728	0.413137	0.315664	CHPF	1	B1
GO:0031062	positive regulation of histone methylation	1/135	39/17913	0.255728	0.413137	0.315664	LMNA	1	B1
GO:0033275	actin-myosin filament sliding	1/135	39/17913	0.255728	0.413137	0.315664	TPM4	1	B1
GO:0033683	nucleotide-excision repair, DNA incision	1/135	39/17913	0.255728	0.413137	0.315664	UBC	1	B1
GO:0042596	fear response	1/135	39/17913	0.255728	0.413137	0.315664	BCL2	1	B1
GO:0045616	regulation of keratinocyte differentiation	1/135	39/17913	0.255728	0.413137	0.315664	AQP3	1	B1
GO:0071548	response to dexamethasone	1/135	39/17913	0.255728	0.413137	0.315664	CFLAR	1	B1
GO:1902229	regulation of intrinsic apoptotic signaling pathway in response to DNA damage	1/135	39/17913	0.255728	0.413137	0.315664	BCL2	1	B1
GO:0002369	T cell cytokine production	1/135	40/17913	0.261349	0.418458	0.31973	KDELR1	1	B1
GO:0019985	translesion synthesis	1/135	40/17913	0.261349	0.418458	0.31973	UBC	1	B1
GO:0031952	regulation of protein autophosphorylation	1/135	40/17913	0.261349	0.418458	0.31973	JUN	1	B1
GO:0032924	activin receptor signaling pathway	1/135	40/17913	0.261349	0.418458	0.31973	CITED2	1	B1
GO:0033574	response to testosterone	1/135	40/17913	0.261349	0.418458	0.31973	CFLAR	1	B1
GO:0042987	amyloid precursor protein catabolic process	1/135	40/17913	0.261349	0.418458	0.31973	TMED10	1	B1
GO:0043403	skeletal muscle tissue regeneration	1/135	40/17913	0.261349	0.418458	0.31973	CFLAR	1	B1
GO:0050435	amyloid-beta metabolic process	1/135	40/17913	0.261349	0.418458	0.31973	TMED10	1	B1
GO:1902893	regulation of pri-miRNA transcription by RNA polymerase II	1/135	40/17913	0.261349	0.418458	0.31973	JUN	1	B1
GO:2000273	positive regulation of signaling receptor activity	1/135	40/17913	0.261349	0.418458	0.31973	FBXW7	1	B1
GO:0001709	cell fate determination	1/135	41/17913	0.266928	0.421209	0.321832	MCL1	1	B1
GO:0009163	nucleoside biosynthetic process	1/135	41/17913	0.266928	0.421209	0.321832	TYMP	1	B1
GO:0010664	negative regulation of striated muscle cell apoptotic process	1/135	41/17913	0.266928	0.421209	0.321832	CFLAR	1	B1
GO:0010677	negative regulation of cellular carbohydrate metabolic process	1/135	41/17913	0.266928	0.421209	0.321832	SELENOS	1	B1
GO:0014002	astrocyte development	1/135	41/17913	0.266928	0.421209	0.321832	LDLR	1	B1
GO:0014003	oligodendrocyte development	1/135	41/17913	0.266928	0.421209	0.321832	GSTP1	1	B1
GO:0031641	regulation of myelination	1/135	41/17913	0.266928	0.421209	0.321832	TYMP	1	B1
GO:0032881	regulation of polysaccharide metabolic process	1/135	41/17913	0.266928	0.421209	0.321832	SELENOS	1	B1
GO:0034122	negative regulation of toll-like receptor signaling pathway	1/135	41/17913	0.266928	0.421209	0.321832	TNFAIP3	1	B1
GO:0043489	RNA stabilization	1/135	41/17913	0.266928	0.421209	0.321832	TENT5C	1	B1
GO:0050434	positive regulation of viral transcription	1/135	41/17913	0.266928	0.421209	0.321832	JUN	1	B1
GO:0050873	brown fat cell differentiation	1/135	41/17913	0.266928	0.421209	0.321832	ITGA6	1	B1
GO:0090184	positive regulation of kidney development	1/135	41/17913	0.266928	0.421209	0.321832	CFLAR	1	B1
GO:0098760	response to interleukin-7	1/135	41/17913	0.266928	0.421209	0.321832	P4HB	1	B1
GO:0098761	cellular response to interleukin-7	1/135	41/17913	0.266928	0.421209	0.321832	P4HB	1	B1
GO:1903146	regulation of autophagy of mitochondrion	1/135	41/17913	0.266928	0.421209	0.321832	FBXW7	1	B1
GO:1904706	negative regulation of vascular smooth muscle cell proliferation	1/135	41/17913	0.266928	0.421209	0.321832	GSTP1	1	B1
GO:0018023	peptidyl-lysine trimethylation	1/135	42/17913	0.272466	0.427821	0.326884	LMNA	1	B1
GO:0032731	positive regulation of interleukin-1 beta production	1/135	42/17913	0.272466	0.427821	0.326884	HSPB1	1	B1
GO:0035307	positive regulation of protein dephosphorylation	1/135	42/17913	0.272466	0.427821	0.326884	PPP1R15A	1	B1
GO:0050654	chondroitin sulfate proteoglycan metabolic process	1/135	42/17913	0.272466	0.427821	0.326884	CHPF	1	B1
GO:1901659	glycosyl compound biosynthetic process	1/135	42/17913	0.272466	0.427821	0.326884	TYMP	1	B1
GO:0003044	regulation of systemic arterial blood pressure mediated by a chemical signal	1/135	43/17913	0.277962	0.431604	0.329774	CYBA	1	B1
GO:0008089	anterograde axonal transport	1/135	43/17913	0.277962	0.431604	0.329774	HSPB1	1	B1
GO:0021762	substantia nigra development	1/135	43/17913	0.277962	0.431604	0.329774	HSPA5	1	B1
GO:0034198	cellular response to amino acid starvation	1/135	43/17913	0.277962	0.431604	0.329774	ATF3	1	B1
GO:0035094	response to nicotine	1/135	43/17913	0.277962	0.431604	0.329774	BCL2	1	B1
GO:0042771	intrinsic apoptotic signaling pathway in response to DNA damage by p53 class mediator	1/135	43/17913	0.277962	0.431604	0.329774	BCL2	1	B1
GO:0051339	regulation of lyase activity	1/135	43/17913	0.277962	0.431604	0.329774	PHPT1	1	B1
GO:0097028	dendritic cell differentiation	1/135	43/17913	0.277962	0.431604	0.329774	GAS6	1	B1
GO:1901031	regulation of response to reactive oxygen species	1/135	43/17913	0.277962	0.431604	0.329774	PSAP	1	B1
GO:1902373	negative regulation of mRNA catabolic process	1/135	43/17913	0.277962	0.431604	0.329774	TENT5C	1	B1
GO:1990090	cellular response to nerve growth factor stimulus	1/135	43/17913	0.277962	0.431604	0.329774	HSPA5	1	B1
GO:0001754	eye photoreceptor cell differentiation	1/135	44/17913	0.283416	0.43524	0.332553	PRDM1	1	B1
GO:0002437	inflammatory response to antigenic stimulus	1/135	44/17913	0.283416	0.43524	0.332553	SELENOS	1	B1
GO:0002548	monocyte chemotaxis	1/135	44/17913	0.283416	0.43524	0.332553	CCL5	1	B1
GO:0007140	male meiotic nuclear division	1/135	44/17913	0.283416	0.43524	0.332553	MEI1	1	B1
GO:0030225	macrophage differentiation	1/135	44/17913	0.283416	0.43524	0.332553	TRIB1	1	B1
GO:0032459	regulation of protein oligomerization	1/135	44/17913	0.283416	0.43524	0.332553	JCHAIN	1	B1
GO:0032965	regulation of collagen biosynthetic process	1/135	44/17913	0.283416	0.43524	0.332553	RGCC	1	B1
GO:0042461	photoreceptor cell development	1/135	44/17913	0.283416	0.43524	0.332553	PRDM1	1	B1
GO:0048599	oocyte development	1/135	44/17913	0.283416	0.43524	0.332553	BCL2	1	B1
GO:0050706	regulation of interleukin-1 beta secretion	1/135	44/17913	0.283416	0.43524	0.332553	TNFAIP3	1	B1
GO:0051205	protein insertion into membrane	1/135	44/17913	0.283416	0.43524	0.332553	BCL2	1	B1
GO:0071622	regulation of granulocyte chemotaxis	1/135	44/17913	0.283416	0.43524	0.332553	CCL5	1	B1
GO:0071827	plasma lipoprotein particle organization	1/135	44/17913	0.283416	0.43524	0.332553	P4HB	1	B1
GO:0002833	positive regulation of response to biotic stimulus	1/135	45/17913	0.28883	0.438471	0.335022	CYBA	1	B1
GO:0005978	glycogen biosynthetic process	1/135	45/17913	0.28883	0.438471	0.335022	SELENOS	1	B1
GO:0006998	nuclear envelope organization	1/135	45/17913	0.28883	0.438471	0.335022	LMNA	1	B1
GO:0009250	glucan biosynthetic process	1/135	45/17913	0.28883	0.438471	0.335022	SELENOS	1	B1
GO:0010463	mesenchymal cell proliferation	1/135	45/17913	0.28883	0.438471	0.335022	LMNA	1	B1
GO:0014014	negative regulation of gliogenesis	1/135	45/17913	0.28883	0.438471	0.335022	LDLR	1	B1
GO:0022602	ovulation cycle process	1/135	45/17913	0.28883	0.438471	0.335022	HSPA5	1	B1
GO:0032570	response to progesterone	1/135	45/17913	0.28883	0.438471	0.335022	FOSB	1	B1
GO:0033628	regulation of cell adhesion mediated by integrin	1/135	45/17913	0.28883	0.438471	0.335022	CCL5	1	B1
GO:0042551	neuron maturation	1/135	45/17913	0.28883	0.438471	0.335022	BCL2	1	B1
GO:0045058	T cell selection	1/135	45/17913	0.28883	0.438471	0.335022	BCL2	1	B1
GO:0045839	negative regulation of mitotic nuclear division	1/135	45/17913	0.28883	0.438471	0.335022	RGCC	1	B1
GO:0046850	regulation of bone remodeling	1/135	45/17913	0.28883	0.438471	0.335022	TNFAIP3	1	B1
GO:0050922	negative regulation of chemotaxis	1/135	45/17913	0.28883	0.438471	0.335022	GSTP1	1	B1
GO:0060412	ventricular septum morphogenesis	1/135	45/17913	0.28883	0.438471	0.335022	CITED2	1	B1
GO:0071675	regulation of mononuclear cell migration	1/135	45/17913	0.28883	0.438471	0.335022	CCL5	1	B1
GO:0006111	regulation of gluconeogenesis	1/135	46/17913	0.294203	0.442359	0.337992	SELENOS	1	B1
GO:0031638	zymogen activation	1/135	46/17913	0.294203	0.442359	0.337992	PERP	1	B1
GO:0032480	negative regulation of type I interferon production	1/135	46/17913	0.294203	0.442359	0.337992	TNFAIP3	1	B1
GO:0048538	thymus development	1/135	46/17913	0.294203	0.442359	0.337992	BCL2	1	B1
GO:0060986	endocrine hormone secretion	1/135	46/17913	0.294203	0.442359	0.337992	SELENOM	1	B1
GO:0061614	pri-miRNA transcription by RNA polymerase II	1/135	46/17913	0.294203	0.442359	0.337992	JUN	1	B1
GO:0070534	protein K63-linked ubiquitination	1/135	46/17913	0.294203	0.442359	0.337992	PELI1	1	B1
GO:0090199	regulation of release of cytochrome c from mitochondria	1/135	46/17913	0.294203	0.442359	0.337992	LMNA	1	B1
GO:1900087	positive regulation of G1/S transition of mitotic cell cycle	1/135	46/17913	0.294203	0.442359	0.337992	RGCC	1	B1
GO:1990089	response to nerve growth factor	1/135	46/17913	0.294203	0.442359	0.337992	HSPA5	1	B1
GO:1990928	response to amino acid starvation	1/135	46/17913	0.294203	0.442359	0.337992	ATF3	1	B1
GO:0006301	postreplication repair	1/135	47/17913	0.299536	0.44585	0.34066	UBC	1	B1
GO:0006576	cellular biogenic amine metabolic process	1/135	47/17913	0.299536	0.44585	0.34066	SAT1	1	B1
GO:0035722	interleukin-12-mediated signaling pathway	1/135	47/17913	0.299536	0.44585	0.34066	P4HB	1	B1
GO:0042743	hydrogen peroxide metabolic process	1/135	47/17913	0.299536	0.44585	0.34066	CYBA	1	B1
GO:0044764	multi-organism cellular process	1/135	47/17913	0.299536	0.44585	0.34066	GAS6	1	B1
GO:0045143	homologous chromosome segregation	1/135	47/17913	0.299536	0.44585	0.34066	MEI1	1	B1
GO:0045912	negative regulation of carbohydrate metabolic process	1/135	47/17913	0.299536	0.44585	0.34066	SELENOS	1	B1
GO:0048641	regulation of skeletal muscle tissue development	1/135	47/17913	0.299536	0.44585	0.34066	BCL2	1	B1
GO:0051438	regulation of ubiquitin-protein transferase activity	1/135	47/17913	0.299536	0.44585	0.34066	FBXW7	1	B1
GO:0006749	glutathione metabolic process	1/135	48/17913	0.304829	0.450003	0.343833	GSTP1	1	B1
GO:0034656	nucleobase-containing small molecule catabolic process	1/135	48/17913	0.304829	0.450003	0.343833	TYMP	1	B1
GO:0042220	response to cocaine	1/135	48/17913	0.304829	0.450003	0.343833	HSPA5	1	B1
GO:0045840	positive regulation of mitotic nuclear division	1/135	48/17913	0.304829	0.450003	0.343833	RGCC	1	B1
GO:0048546	digestive tract morphogenesis	1/135	48/17913	0.304829	0.450003	0.343833	BCL2	1	B1
GO:0051452	intracellular pH reduction	1/135	48/17913	0.304829	0.450003	0.343833	BCL2	1	B1
GO:0061647	histone H3-K9 modification	1/135	48/17913	0.304829	0.450003	0.343833	LMNA	1	B1
GO:0071825	protein-lipid complex subunit organization	1/135	48/17913	0.304829	0.450003	0.343833	P4HB	1	B1
GO:0090329	regulation of DNA-dependent DNA replication	1/135	48/17913	0.304829	0.450003	0.343833	FBXW7	1	B1
GO:0003254	regulation of membrane depolarization	1/135	49/17913	0.310082	0.453502	0.346506	BCL2	1	B1
GO:0007595	lactation	1/135	49/17913	0.310082	0.453502	0.346506	XBP1	1	B1
GO:0008333	endosome to lysosome transport	1/135	49/17913	0.310082	0.453502	0.346506	RHOB	1	B1
GO:0009994	oocyte differentiation	1/135	49/17913	0.310082	0.453502	0.346506	BCL2	1	B1
GO:0010712	regulation of collagen metabolic process	1/135	49/17913	0.310082	0.453502	0.346506	RGCC	1	B1
GO:0035272	exocrine system development	1/135	49/17913	0.310082	0.453502	0.346506	XBP1	1	B1
GO:0048260	positive regulation of receptor-mediated endocytosis	1/135	49/17913	0.310082	0.453502	0.346506	CD63	1	B1
GO:0050879	multicellular organismal movement	1/135	49/17913	0.310082	0.453502	0.346506	JSRP1	1	B1
GO:0050881	musculoskeletal movement	1/135	49/17913	0.310082	0.453502	0.346506	JSRP1	1	B1
GO:0060395	SMAD protein signal transduction	1/135	49/17913	0.310082	0.453502	0.346506	JUN	1	B1
GO:0071349	cellular response to interleukin-12	1/135	49/17913	0.310082	0.453502	0.346506	P4HB	1	B1
GO:0090102	cochlea development	1/135	49/17913	0.310082	0.453502	0.346506	PSAP	1	B1
GO:1902369	negative regulation of RNA catabolic process	1/135	49/17913	0.310082	0.453502	0.346506	TENT5C	1	B1
GO:0000731	DNA synthesis involved in DNA repair	1/135	50/17913	0.315296	0.45688	0.349087	UBC	1	B1
GO:0002931	response to ischemia	1/135	50/17913	0.315296	0.45688	0.349087	BCL2	1	B1
GO:0007062	sister chromatid cohesion	1/135	50/17913	0.315296	0.45688	0.349087	FBXW7	1	B1
GO:0010718	positive regulation of epithelial to mesenchymal transition	1/135	50/17913	0.315296	0.45688	0.349087	RGCC	1	B1
GO:0032873	negative regulation of stress-activated MAPK cascade	1/135	50/17913	0.315296	0.45688	0.349087	GSTP1	1	B1
GO:0036297	interstrand cross-link repair	1/135	50/17913	0.315296	0.45688	0.349087	UBC	1	B1
GO:0045851	pH reduction	1/135	50/17913	0.315296	0.45688	0.349087	BCL2	1	B1
GO:0055081	anion homeostasis	1/135	50/17913	0.315296	0.45688	0.349087	XBP1	1	B1
GO:0060976	coronary vasculature development	1/135	50/17913	0.315296	0.45688	0.349087	PRDM1	1	B1
GO:0070303	negative regulation of stress-activated protein kinase signaling cascade	1/135	50/17913	0.315296	0.45688	0.349087	GSTP1	1	B1
GO:0070671	response to interleukin-12	1/135	50/17913	0.315296	0.45688	0.349087	P4HB	1	B1
GO:1905517	macrophage migration	1/135	50/17913	0.315296	0.45688	0.349087	CCL5	1	B1
GO:0006213	pyrimidine nucleoside metabolic process	1/135	51/17913	0.320471	0.460402	0.351778	TYMP	1	B1
GO:0030239	myofibril assembly	1/135	51/17913	0.320471	0.460402	0.351778	CFLAR	1	B1
GO:0032781	positive regulation of ATPase activity	1/135	51/17913	0.320471	0.460402	0.351778	DNAJC1	1	B1
GO:0045599	negative regulation of fat cell differentiation	1/135	51/17913	0.320471	0.460402	0.351778	RORA	1	B1
GO:0045744	negative regulation of G protein-coupled receptor signaling pathway	1/135	51/17913	0.320471	0.460402	0.351778	CCL5	1	B1
GO:0050702	interleukin-1 beta secretion	1/135	51/17913	0.320471	0.460402	0.351778	TNFAIP3	1	B1
GO:0050885	neuromuscular process controlling balance	1/135	51/17913	0.320471	0.460402	0.351778	PSAP	1	B1
GO:0051496	positive regulation of stress fiber assembly	1/135	51/17913	0.320471	0.460402	0.351778	RGCC	1	B1
GO:0070098	chemokine-mediated signaling pathway	1/135	51/17913	0.320471	0.460402	0.351778	CCL5	1	B1
GO:0097366	response to bronchodilator	1/135	51/17913	0.320471	0.460402	0.351778	CFLAR	1	B1
GO:0098930	axonal transport	1/135	51/17913	0.320471	0.460402	0.351778	HSPB1	1	B1
GO:0150077	regulation of neuroinflammatory response	1/135	51/17913	0.320471	0.460402	0.351778	LDLR	1	B1
GO:2000677	regulation of transcription regulatory region DNA binding	1/135	51/17913	0.320471	0.460402	0.351778	FBXW7	1	B1
GO:0003341	cilium movement	1/135	52/17913	0.325607	0.464335	0.354783	DNAAF1	1	B1
GO:0007566	embryo implantation	1/135	52/17913	0.325607	0.464335	0.354783	VMP1	1	B1
GO:0021879	forebrain neuron differentiation	1/135	52/17913	0.325607	0.464335	0.354783	ATF5	1	B1
GO:0035082	axoneme assembly	1/135	52/17913	0.325607	0.464335	0.354783	DNAAF1	1	B1
GO:0048747	muscle fiber development	1/135	52/17913	0.325607	0.464335	0.354783	BCL2	1	B1
GO:0051353	positive regulation of oxidoreductase activity	1/135	52/17913	0.325607	0.464335	0.354783	CYBA	1	B1
GO:0051784	negative regulation of nuclear division	1/135	52/17913	0.325607	0.464335	0.354783	RGCC	1	B1
GO:0070192	chromosome organization involved in meiotic cell cycle	1/135	52/17913	0.325607	0.464335	0.354783	MEI1	1	B1
GO:0071320	cellular response to cAMP	1/135	52/17913	0.325607	0.464335	0.354783	HSPA5	1	B1
GO:0072528	pyrimidine-containing compound biosynthetic process	1/135	52/17913	0.325607	0.464335	0.354783	TYMP	1	B1
GO:2000242	negative regulation of reproductive process	1/135	52/17913	0.325607	0.464335	0.354783	PRDX4	1	B1
GO:0000768	syncytium formation by plasma membrane fusion	1/135	53/17913	0.330704	0.467893	0.357502	CFLAR	1	B1
GO:0030166	proteoglycan biosynthetic process	1/135	53/17913	0.330704	0.467893	0.357502	CHPF	1	B1
GO:0032964	collagen biosynthetic process	1/135	53/17913	0.330704	0.467893	0.357502	RGCC	1	B1
GO:0035384	thioester biosynthetic process	1/135	53/17913	0.330704	0.467893	0.357502	PDK1	1	B1
GO:0042130	negative regulation of T cell proliferation	1/135	53/17913	0.330704	0.467893	0.357502	PELI1	1	B1
GO:0046503	glycerolipid catabolic process	1/135	53/17913	0.330704	0.467893	0.357502	LDLR	1	B1
GO:0050853	B cell receptor signaling pathway	1/135	53/17913	0.330704	0.467893	0.357502	BCL2	1	B1
GO:0050994	regulation of lipid catabolic process	1/135	53/17913	0.330704	0.467893	0.357502	LDLR	1	B1
GO:0071616	acyl-CoA biosynthetic process	1/135	53/17913	0.330704	0.467893	0.357502	PDK1	1	B1
GO:0140253	cell-cell fusion	1/135	53/17913	0.330704	0.467893	0.357502	CFLAR	1	B1
GO:0001541	ovarian follicle development	1/135	54/17913	0.335763	0.472924	0.361346	BCL2	1	B1
GO:0019226	transmission of nerve impulse	1/135	54/17913	0.335763	0.472924	0.361346	TYMP	1	B1
GO:0032663	regulation of interleukin-2 production	1/135	54/17913	0.335763	0.472924	0.361346	TNFAIP3	1	B1
GO:0046605	regulation of centrosome cycle	1/135	54/17913	0.335763	0.472924	0.361346	ATF5	1	B1
GO:0061178	regulation of insulin secretion involved in cellular response to glucose stimulus	1/135	54/17913	0.335763	0.472924	0.361346	PHPT1	1	B1
GO:0000422	autophagy of mitochondrion	1/135	55/17913	0.340784	0.477325	0.364709	FBXW7	1	B1
GO:0002066	columnar/cuboidal epithelial cell development	1/135	55/17913	0.340784	0.477325	0.364709	PRDM1	1	B1
GO:0002090	regulation of receptor internalization	1/135	55/17913	0.340784	0.477325	0.364709	CD63	1	B1
GO:0006949	syncytium formation	1/135	55/17913	0.340784	0.477325	0.364709	CFLAR	1	B1
GO:0031295	T cell costimulation	1/135	55/17913	0.340784	0.477325	0.364709	LGALS1	1	B1
GO:0032722	positive regulation of chemokine production	1/135	55/17913	0.340784	0.477325	0.364709	SELENOK	1	B1
GO:0035306	positive regulation of dephosphorylation	1/135	55/17913	0.340784	0.477325	0.364709	PPP1R15A	1	B1
GO:0042982	amyloid precursor protein metabolic process	1/135	55/17913	0.340784	0.477325	0.364709	TMED10	1	B1
GO:0061726	mitochondrion disassembly	1/135	55/17913	0.340784	0.477325	0.364709	FBXW7	1	B1
GO:0006977	DNA damage response, signal transduction by p53 class mediator resulting in cell cycle arrest	1/135	56/17913	0.345767	0.482426	0.368606	RGCC	1	B1
GO:0031294	lymphocyte costimulation	1/135	56/17913	0.345767	0.482426	0.368606	LGALS1	1	B1
GO:0033619	membrane protein proteolysis	1/135	56/17913	0.345767	0.482426	0.368606	HM13	1	B1
GO:0071398	cellular response to fatty acid	1/135	56/17913	0.345767	0.482426	0.368606	LDLR	1	B1
GO:1902808	positive regulation of cell cycle G1/S phase transition	1/135	56/17913	0.345767	0.482426	0.368606	RGCC	1	B1
GO:0010518	positive regulation of phospholipase activity	1/135	57/17913	0.350713	0.483167	0.369172	CCL5	1	B1
GO:0010665	regulation of cardiac muscle cell apoptotic process	1/135	57/17913	0.350713	0.483167	0.369172	CFLAR	1	B1
GO:0032507	maintenance of protein location in cell	1/135	57/17913	0.350713	0.483167	0.369172	HSPA5	1	B1
GO:0032515	negative regulation of phosphoprotein phosphatase activity	1/135	57/17913	0.350713	0.483167	0.369172	PPP1R15A	1	B1
GO:0035418	protein localization to synapse	1/135	57/17913	0.350713	0.483167	0.369172	HSPB1	1	B1
GO:0035904	aorta development	1/135	57/17913	0.350713	0.483167	0.369172	PRDM1	1	B1
GO:0044786	cell cycle DNA replication	1/135	57/17913	0.350713	0.483167	0.369172	FBXW7	1	B1
GO:0045453	bone resorption	1/135	57/17913	0.350713	0.483167	0.369172	TNFAIP3	1	B1
GO:0045604	regulation of epidermal cell differentiation	1/135	57/17913	0.350713	0.483167	0.369172	AQP3	1	B1
GO:0045824	negative regulation of innate immune response	1/135	57/17913	0.350713	0.483167	0.369172	TNFAIP3	1	B1
GO:0046686	response to cadmium ion	1/135	57/17913	0.350713	0.483167	0.369172	JUN	1	B1
GO:0051055	negative regulation of lipid biosynthetic process	1/135	57/17913	0.350713	0.483167	0.369172	FBXW7	1	B1
GO:0072431	signal transduction involved in mitotic G1 DNA damage checkpoint	1/135	57/17913	0.350713	0.483167	0.369172	RGCC	1	B1
GO:0075733	intracellular transport of virus	1/135	57/17913	0.350713	0.483167	0.369172	UBC	1	B1
GO:0090183	regulation of kidney development	1/135	57/17913	0.350713	0.483167	0.369172	CFLAR	1	B1
GO:1902400	intracellular signal transduction involved in G1 DNA damage checkpoint	1/135	57/17913	0.350713	0.483167	0.369172	RGCC	1	B1
GO:1903428	positive regulation of reactive oxygen species biosynthetic process	1/135	57/17913	0.350713	0.483167	0.369172	CYBA	1	B1
GO:0032233	positive regulation of actin filament bundle assembly	1/135	58/17913	0.355622	0.488593	0.373318	RGCC	1	B1
GO:0032370	positive regulation of lipid transport	1/135	58/17913	0.355622	0.488593	0.373318	NFKBIA	1	B1
GO:0042093	T-helper cell differentiation	1/135	58/17913	0.355622	0.488593	0.373318	RORA	1	B1
GO:0046626	regulation of insulin receptor signaling pathway	1/135	58/17913	0.355622	0.488593	0.373318	MZB1	1	B1
GO:0046847	filopodium assembly	1/135	58/17913	0.355622	0.488593	0.373318	ITGA6	1	B1
GO:0001947	heart looping	1/135	59/17913	0.360494	0.490733	0.374953	DNAAF1	1	B1
GO:0010656	negative regulation of muscle cell apoptotic process	1/135	59/17913	0.360494	0.490733	0.374953	CFLAR	1	B1
GO:0010662	regulation of striated muscle cell apoptotic process	1/135	59/17913	0.360494	0.490733	0.374953	CFLAR	1	B1
GO:0033692	cellular polysaccharide biosynthetic process	1/135	59/17913	0.360494	0.490733	0.374953	SELENOS	1	B1
GO:0042267	natural killer cell mediated cytotoxicity	1/135	59/17913	0.360494	0.490733	0.374953	SLAMF7	1	B1
GO:0045071	negative regulation of viral genome replication	1/135	59/17913	0.360494	0.490733	0.374953	CCL5	1	B1
GO:0046530	photoreceptor cell differentiation	1/135	59/17913	0.360494	0.490733	0.374953	PRDM1	1	B1
GO:0072413	signal transduction involved in mitotic cell cycle checkpoint	1/135	59/17913	0.360494	0.490733	0.374953	RGCC	1	B1
GO:0090303	positive regulation of wound healing	1/135	59/17913	0.360494	0.490733	0.374953	XBP1	1	B1
GO:0090342	regulation of cell aging	1/135	59/17913	0.360494	0.490733	0.374953	LMNA	1	B1
GO:1902402	signal transduction involved in mitotic DNA damage checkpoint	1/135	59/17913	0.360494	0.490733	0.374953	RGCC	1	B1
GO:1902403	signal transduction involved in mitotic DNA integrity checkpoint	1/135	59/17913	0.360494	0.490733	0.374953	RGCC	1	B1
GO:0001658	branching involved in ureteric bud morphogenesis	1/135	60/17913	0.36533	0.49252	0.376319	BCL2	1	B1
GO:0002294	CD4-positive, alpha-beta T cell differentiation involved in immune response	1/135	60/17913	0.36533	0.49252	0.376319	RORA	1	B1
GO:0010659	cardiac muscle cell apoptotic process	1/135	60/17913	0.36533	0.49252	0.376319	CFLAR	1	B1
GO:0032371	regulation of sterol transport	1/135	60/17913	0.36533	0.49252	0.376319	NFKBIA	1	B1
[truncated: 16,917 more rows]
