# Supplementary material for: Single-cell RNA sequencing of human femoral head in vivo
Source: Aging (Albany NY). 2021 Jun 10;13(11):15595–619. doi: 10.18632/aging.203124 (PMC8221309; doi:10.18632/aging.203124)
Supplement: Supplementary Table 13 [file aging-13-203124-s014.xlsx]

## Sheet: Sheet1
Supplementary Table 13. KEGG enrichment analyses of each B cells subtype.
ID	Description	GeneRatio	BgRatio	pvalue	p.adjust	qvalue	geneID	Count	Subtype
hsa04141	Protein processing in endoplasmic reticulum	28/76	167/8035	1.66e-28	2.43e-26	2.09e-26	ERN1/TXNDC5/PDIA4/SEL1L/DERL3/RRBP1/SELENOS/ERLEC1/LMAN1/SSR4/HSP90B1/SSR3/DNAJC1/XBP1/DNAJC3/RPN2/BCL2/P4HB/LMAN2/HSPA5/PPP1R15A/HERPUD1/SEC61B/PDIA6/DAD1/SEC61G/HSPA1B/HSPA1A	28	B1
hsa03060	Protein export	7/76	23/8035	1.11e-09	8.16e-08	7.01e-08	SEC11C/SPCS3/SPCS2/HSPA5/SPCS1/SEC61B/SEC61G	7	B1
hsa04210	Apoptosis	7/76	136/8035	0.000281922	0.0103606	0.00890279	ERN1/LMNA/JUN/BCL2/MCL1/CFLAR/NFKBIA	7	B1
hsa05145	Toxoplasmosis	6/76	112/8035	0.000634608	0.0186575	0.0160322	LDLR/ITGA6/BCL2/NFKBIA/HSPA1B/HSPA1A	6	B1
hsa05162	Measles	6/76	138/8035	0.00187817	0.0358012	0.0307637	JUN/BCL2/TNFAIP3/NFKBIA/HSPA1B/HSPA1A	6	B1
hsa05418	Fluid shear stress and atherosclerosis	6/76	139/8035	0.00194837	0.0358012	0.0307637	SDC1/JUN/HSP90B1/BCL2/GSTP1/CYBA	6	B1
hsa04621	NOD-like receptor signaling pathway	6/76	181/8035	0.0071366	0.0953709	0.0819514	JUN/BCL2/TNFAIP3/NFKBIA/CYBA/CCL5	6	B1
hsa05132	Salmonella infection	6/76	213/8035	0.0151542	0.144223	0.12393	JUN/HSP90B1/BCL2/AHNAK/RHOB/NFKBIA	6	B1
hsa04010	MAPK signaling pathway	6/76	294/8035	0.0590059	0.279802	0.240431	DUSP5/JUN/RASGRP3/HSPB1/HSPA1B/HSPA1A	6	B1
hsa05110	Vibrio cholerae infection	5/76	50/8035	0.000100758	0.00493713	0.00424244	PDIA4/KDELR2/KDELR1/SEC61B/SEC61G	5	B1
hsa04657	IL-17 signaling pathway	5/76	94/8035	0.00189021	0.0358012	0.0307637	JUN/HSP90B1/FOSB/TNFAIP3/NFKBIA	5	B1
hsa04668	TNF signaling pathway	5/76	112/8035	0.00405056	0.0629543	0.054096	JUN/CFLAR/TNFAIP3/NFKBIA/CCL5	5	B1
hsa04915	Estrogen signaling pathway	5/76	138/8035	0.00968546	0.118647	0.101952	JUN/HSP90B1/BCL2/HSPA1B/HSPA1A	5	B1
hsa05131	Shigellosis	5/76	242/8035	0.0784755	0.297199	0.25538	JUN/BCL2/UBC/NFKBIA/CCL5	5	B1
hsa05215	Prostate cancer	4/76	97/8035	0.013203	0.144223	0.12393	HSP90B1/BCL2/GSTP1/NFKBIA	4	B1
hsa05142	Chagas disease (American trypanosomiasis)	4/76	102/8035	0.015633	0.144223	0.12393	JUN/CFLAR/NFKBIA/CCL5	4	B1
hsa04064	NF-kappa B signaling pathway	4/76	104/8035	0.0166789	0.144223	0.12393	BCL2/CFLAR/TNFAIP3/NFKBIA	4	B1
hsa04380	Osteoclast differentiation	4/76	128/8035	0.0327037	0.21943	0.188554	JUN/FOSB/NFKBIA/CYBA	4	B1
hsa04140	Autophagy - animal	4/76	137/8035	0.0404322	0.228597	0.196431	ERN1/BCL2/CFLAR/VMP1	4	B1
hsa04217	Necroptosis	4/76	159/8035	0.0633498	0.282195	0.242487	ZBP1/BCL2/CFLAR/TNFAIP3	4	B1
hsa05130	Pathogenic Escherichia coli infection	4/76	192/8035	0.108028	0.378098	0.324896	JUN/TMED10/NFKBIA/TMBIM6	4	B1
hsa05169	Epstein-Barr virus infection	4/76	202/8035	0.123802	0.401536	0.345036	JUN/BCL2/TNFAIP3/NFKBIA	4	B1
hsa05012	Parkinson disease	4/76	249/8035	0.209161	0.495913	0.426134	ERN1/XBP1/HSPA5/UBC	4	B1
hsa04060	Cytokine-cytokine receptor interaction	4/76	294/8035	0.302581	0.595254	0.511497	CD27/TNFRSF17/TNFRSF13B/CCL5	4	B1
hsa04151	PI3K-Akt signaling pathway	4/76	354/8035	0.432354	0.669011	0.574875	ITGA6/HSP90B1/BCL2/MCL1	4	B1
hsa05020	Prion diseases	3/76	35/8035	0.0042826	0.0629543	0.054096	HSPA5/CCL5/HSPA1A	3	B1
hsa05134	Legionellosis	3/76	57/8035	0.016511	0.144223	0.12393	NFKBIA/HSPA1B/HSPA1A	3	B1
hsa04623	Cytosolic DNA-sensing pathway	3/76	63/8035	0.0215266	0.1758	0.151064	ZBP1/NFKBIA/CCL5	3	B1
hsa04137	Mitophagy - animal	3/76	68/8035	0.0262751	0.203286	0.174682	JUN/CITED2/UBC	3	B1
hsa05120	Epithelial cell signaling in Helicobacter pylori infection	3/76	70/8035	0.0283194	0.208147	0.178859	JUN/NFKBIA/CCL5	3	B1
hsa04918	Thyroid hormone synthesis	3/76	75/8035	0.0337902	0.21943	0.188554	PDIA4/HSP90B1/HSPA5	3	B1
hsa05140	Leishmaniasis	3/76	77/8035	0.0361217	0.21943	0.188554	JUN/NFKBIA/CYBA	3	B1
hsa04612	Antigen processing and presentation	3/76	78/8035	0.037318	0.21943	0.188554	HSPA5/HSPA1B/HSPA1A	3	B1
hsa04662	B cell receptor signaling pathway	3/76	82/8035	0.0423043	0.230323	0.197915	JUN/RASGRP3/NFKBIA	3	B1
hsa05410	Hypertrophic cardiomyopathy (HCM)	3/76	90/8035	0.0532261	0.269801	0.231838	LMNA/ITGA6/TPM4	3	B1
hsa05222	Small cell lung cancer	3/76	92/8035	0.0561498	0.275134	0.23642	ITGA6/BCL2/NFKBIA	3	B1
hsa05414	Dilated cardiomyopathy (DCM)	3/76	96/8035	0.0622225	0.282195	0.242487	LMNA/ITGA6/TPM4	3	B1
hsa04620	Toll-like receptor signaling pathway	3/76	104/8035	0.0752415	0.297199	0.25538	JUN/NFKBIA/CCL5	3	B1
hsa04659	Th17 cell differentiation	3/76	107/8035	0.0804124	0.297199	0.25538	RORA/JUN/NFKBIA	3	B1
hsa04722	Neurotrophin signaling pathway	3/76	119/8035	0.102568	0.367744	0.315999	JUN/BCL2/NFKBIA	3	B1
hsa04142	Lysosome	3/76	128/8035	0.120608	0.401536	0.345036	PSAP/CD63/NPC2	3	B1
hsa05017	Spinocerebellar ataxia	3/76	133/8035	0.131107	0.410057	0.352358	ERN1/RORA/XBP1	3	B1
hsa04932	Non-alcoholic fatty liver disease (NAFLD)	3/76	149/8035	0.166697	0.455882	0.391735	ERN1/JUN/XBP1	3	B1
hsa04145	Phagosome	3/76	152/8035	0.173669	0.455882	0.391735	SEC61B/SEC61G/CYBA	3	B1
hsa05160	Hepatitis C	3/76	155/8035	0.180724	0.466078	0.400497	LDLR/CFLAR/NFKBIA	3	B1
hsa05161	Hepatitis B	3/76	162/8035	0.197482	0.492032	0.422799	JUN/BCL2/NFKBIA	3	B1
hsa05164	Influenza A	3/76	170/8035	0.217083	0.496603	0.426726	DNAJC3/NFKBIA/CCL5	3	B1
hsa05167	Kaposi sarcoma-associated herpesvirus infection	3/76	189/8035	0.265082	0.548832	0.471607	JUN/UBC/NFKBIA	3	B1
hsa04510	Focal adhesion	3/76	201/8035	0.29608	0.595254	0.511497	JUN/ITGA6/BCL2	3	B1
hsa05170	Human immunodeficiency virus 1 infection	3/76	212/8035	0.324712	0.611957	0.525849	JUN/BCL2/NFKBIA	3	B1
hsa04144	Endocytosis	3/76	248/8035	0.417873	0.662849	0.56958	LDLR/HSPA1B/HSPA1A	3	B1
hsa05168	Herpes simplex virus 1 infection	3/76	491/8035	0.851809	0.888056	0.763099	BCL2/NFKBIA/CCL5	3	B1
hsa04710	Circadian rhythm	2/76	31/8035	0.0344015	0.21943	0.188554	BHLHE41/RORA	2	B1
hsa00513	Various types of N-glycan biosynthesis	2/76	39/8035	0.0522429	0.269801	0.231838	RPN2/DAD1	2	B1
hsa04672	Intestinal immune network for IgA production	2/76	49/8035	0.0780993	0.297199	0.25538	TNFRSF17/TNFRSF13B	2	B1
hsa05030	Cocaine addiction	2/76	49/8035	0.0780993	0.297199	0.25538	JUN/FOSB	2	B1
hsa00510	N-Glycan biosynthesis	2/76	50/8035	0.0808705	0.297199	0.25538	RPN2/DAD1	2	B1
hsa04979	Cholesterol metabolism	2/76	50/8035	0.0808705	0.297199	0.25538	LDLR/NPC2	2	B1
hsa04213	Longevity regulating pathway - multiple species	2/76	62/8035	0.11627	0.397481	0.341552	HSPA1B/HSPA1A	2	B1
hsa05321	Inflammatory bowel disease (IBD)	2/76	65/8035	0.125651	0.401536	0.345036	RORA/JUN	2	B1
hsa05031	Amphetamine addiction	2/76	69/8035	0.138429	0.423938	0.364286	JUN/FOSB	2	B1
hsa01524	Platinum drug resistance	2/76	73/8035	0.151479	0.445348	0.382683	BCL2/GSTP1	2	B1
hsa04115	p53 signaling pathway	2/76	73/8035	0.151479	0.445348	0.382683	PERP/BCL2	2	B1
hsa05412	Arrhythmogenic right ventricular cardiomyopathy (ARVC)	2/76	77/8035	0.164764	0.455882	0.391735	LMNA/ITGA6	2	B1
hsa00983	Drug metabolism - other enzymes	2/76	79/8035	0.171484	0.455882	0.391735	TYMP/GSTP1	2	B1
hsa01521	EGFR tyrosine kinase inhibitor resistance	2/76	79/8035	0.171484	0.455882	0.391735	GAS6/BCL2	2	B1
hsa05210	Colorectal cancer	2/76	86/8035	0.195337	0.492032	0.422799	JUN/BCL2	2	B1
hsa04512	ECM-receptor interaction	2/76	88/8035	0.202231	0.495467	0.42575	SDC1/ITGA6	2	B1
hsa05235	PD-L1 expression and PD-1 checkpoint pathway in cancer	2/76	89/8035	0.20569	0.495679	0.425932	JUN/NFKBIA	2	B1
hsa04658	Th1 and Th2 cell differentiation	2/76	92/8035	0.216104	0.496603	0.426726	JUN/NFKBIA	2	B1
hsa05323	Rheumatoid arthritis	2/76	93/8035	0.219586	0.496603	0.426726	JUN/CCL5	2	B1
hsa01522	Endocrine resistance	2/76	98/8035	0.237068	0.528014	0.453718	JUN/BCL2	2	B1
hsa04933	AGE-RAGE signaling pathway in diabetic complications	2/76	100/8035	0.244085	0.535529	0.460176	JUN/BCL2	2	B1
hsa04625	C-type lectin receptor signaling pathway	2/76	104/8035	0.258145	0.548832	0.471607	JUN/NFKBIA	2	B1
hsa04660	T cell receptor signaling pathway	2/76	104/8035	0.258145	0.548832	0.471607	JUN/NFKBIA	2	B1
hsa04066	HIF-1 signaling pathway	2/76	109/8035	0.27574	0.56297	0.483755	PDK1/BCL2	2	B1
hsa04926	Relaxin signaling pathway	2/76	129/8035	0.345636	0.633528	0.544385	JUN/NFKBIA	2	B1
hsa05135	Yersinia infection	2/76	130/8035	0.349087	0.633528	0.544385	JUN/NFKBIA	2	B1
hsa04120	Ubiquitin mediated proteolysis	2/76	140/8035	0.383247	0.658159	0.56555	FBXW7/UBC	2	B1
hsa04514	Cell adhesion molecules (CAMs)	2/76	148/8035	0.410037	0.662849	0.56958	SDC1/ITGA6	2	B1
hsa03040	Spliceosome	2/76	149/8035	0.413348	0.662849	0.56958	HSPA1B/HSPA1A	2	B1
hsa04261	Adrenergic signaling in cardiomyocytes	2/76	149/8035	0.413348	0.662849	0.56958	BCL2/TPM4	2	B1
hsa04630	JAK-STAT signaling pathway	2/76	162/8035	0.455534	0.690345	0.593207	BCL2/MCL1	2	B1
hsa04062	Chemokine signaling pathway	2/76	189/8035	0.537393	0.731451	0.62853	NFKBIA/CCL5	2	B1
hsa05203	Viral carcinogenesis	2/76	204/8035	0.579162	0.744577	0.639808	JUN/NFKBIA	2	B1
hsa05205	Proteoglycans in cancer	2/76	205/8035	0.581848	0.744577	0.639808	SDC1/CD63	2	B1
hsa04024	cAMP signaling pathway	2/76	216/8035	0.610584	0.744577	0.639808	JUN/NFKBIA	2	B1
hsa05166	Human T-cell leukemia virus 1 infection	2/76	219/8035	0.618161	0.744577	0.639808	JUN/NFKBIA	2	B1
hsa05163	Human cytomegalovirus infection	2/76	225/8035	0.63298	0.749413	0.643964	NFKBIA/CCL5	2	B1
hsa05206	MicroRNAs in cancer	2/76	310/8035	0.797806	0.859268	0.738361	BCL2/MCL1	2	B1
hsa05010	Alzheimer disease	2/76	369/8035	0.870456	0.8909	0.765543	ERN1/XBP1	2	B1
hsa00532	Glycosaminoglycan biosynthesis - chondroitin sulfate / dermatan sulfate	1/76	20/8035	0.173288	0.455882	0.391735	CHPF	1	B1
hsa04215	Apoptosis - multiple species	1/76	32/8035	0.262661	0.548832	0.471607	BCL2	1	B1
hsa05340	Primary immunodeficiency	1/76	38/8035	0.303701	0.595254	0.511497	TNFRSF13B	1	B1
hsa04216	Ferroptosis	1/76	41/8035	0.323367	0.611957	0.525849	SAT1	1	B1
hsa05219	Bladder cancer	1/76	41/8035	0.323367	0.611957	0.525849	TYMP	1	B1
hsa04962	Vasopressin-regulated water reabsorption	1/76	44/8035	0.342485	0.633528	0.544385	AQP3	1	B1
hsa00330	Arginine and proline metabolism	1/76	50/8035	0.379136	0.658159	0.56555	SAT1	1	B1
hsa04340	Hedgehog signaling pathway	1/76	50/8035	0.379136	0.658159	0.56555	BCL2	1	B1
hsa05144	Malaria	1/76	50/8035	0.379136	0.658159	0.56555	SDC1	1	B1
hsa04913	Ovarian steroidogenesis	1/76	51/8035	0.385046	0.658159	0.56555	LDLR	1	B1
hsa00240	Pyrimidine metabolism	1/76	57/8035	0.419353	0.662849	0.56958	TYMP	1	B1
hsa00480	Glutathione metabolism	1/76	57/8035	0.419353	0.662849	0.56958	GSTP1	1	B1
hsa05014	Amyotrophic lateral sclerosis (ALS)	1/76	57/8035	0.419353	0.662849	0.56958	BCL2	1	B1
hsa04370	VEGF signaling pathway	1/76	59/8035	0.430364	0.669011	0.574875	HSPB1	1	B1
hsa00561	Glycerolipid metabolism	1/76	61/8035	0.441169	0.67554	0.580485	PLPP5	1	B1
hsa04927	Cortisol synthesis and secretion	1/76	65/8035	0.462175	0.693262	0.595714	LDLR	1	B1
hsa04920	Adipocytokine signaling pathway	1/76	69/8035	0.482401	0.702342	0.603516	NFKBIA	1	B1
hsa05211	Renal cell carcinoma	1/76	69/8035	0.482401	0.702342	0.603516	JUN	1	B1
hsa04622	RIG-I-like receptor signaling pathway	1/76	70/8035	0.487339	0.702342	0.603516	NFKBIA	1	B1
hsa05230	Central carbon metabolism in cancer	1/76	70/8035	0.487339	0.702342	0.603516	PDK1	1	B1
hsa00982	Drug metabolism - cytochrome P450	1/76	71/8035	0.492231	0.702505	0.603656	GSTP1	1	B1
hsa00980	Metabolism of xenobiotics by cytochrome P450	1/76	76/8035	0.516007	0.715256	0.614613	GSTP1	1	B1
hsa05133	Pertussis	1/76	76/8035	0.516007	0.715256	0.614613	JUN	1	B1
hsa05220	Chronic myeloid leukemia	1/76	76/8035	0.516007	0.715256	0.614613	NFKBIA	1	B1
hsa03320	PPAR signaling pathway	1/76	77/8035	0.520629	0.715256	0.614613	UBC	1	B1
hsa05204	Chemical carcinogenesis	1/76	82/8035	0.543091	0.732426	0.629367	GSTP1	1	B1
hsa04012	ErbB signaling pathway	1/76	85/8035	0.556067	0.743108	0.638546	JUN	1	B1
hsa04260	Cardiac muscle contraction	1/76	87/8035	0.564515	0.744577	0.639808	TPM4	1	B1
hsa04976	Bile secretion	1/76	90/8035	0.57689	0.744577	0.639808	LDLR	1	B1
hsa04912	GnRH signaling pathway	1/76	93/8035	0.588918	0.744577	0.639808	JUN	1	B1
hsa00564	Glycerophospholipid metabolism	1/76	98/8035	0.608219	0.744577	0.639808	PLPP5	1	B1
hsa04925	Aldosterone synthesis and secretion	1/76	98/8035	0.608219	0.744577	0.639808	LDLR	1	B1
hsa05231	Choline metabolism in cancer	1/76	98/8035	0.608219	0.744577	0.639808	JUN	1	B1
hsa04640	Hematopoietic cell lineage	1/76	99/8035	0.61197	0.744577	0.639808	ITGA6	1	B1
hsa04061	Viral protein interaction with cytokine and cytokine receptor	1/76	100/8035	0.615686	0.744577	0.639808	CCL5	1	B1
hsa05146	Amoebiasis	1/76	102/8035	0.623013	0.744577	0.639808	HSPB1	1	B1
hsa04928	Parathyroid hormone synthesis, secretion and action	1/76	106/8035	0.637256	0.749413	0.643964	BCL2	1	B1
hsa04931	Insulin resistance	1/76	108/8035	0.644177	0.75154	0.645791	NFKBIA	1	B1
hsa04670	Leukocyte transendothelial migration	1/76	113/8035	0.660914	0.759019	0.652218	CYBA	1	B1
hsa04725	Cholinergic synapse	1/76	113/8035	0.660914	0.759019	0.652218	BCL2	1	B1
hsa04071	Sphingolipid signaling pathway	1/76	119/8035	0.679976	0.774857	0.665827	BCL2	1	B1
hsa05224	Breast cancer	1/76	147/8035	0.755843	0.853414	0.733331	JUN	1	B1
hsa05226	Gastric cancer	1/76	149/8035	0.760526	0.853414	0.733331	BCL2	1	B1
hsa04921	Oxytocin signaling pathway	1/76	154/8035	0.771848	0.855527	0.735146	JUN	1	B1
hsa04934	Cushing syndrome	1/76	155/8035	0.774048	0.855527	0.735146	LDLR	1	B1
hsa04310	Wnt signaling pathway	1/76	160/8035	0.784739	0.856755	0.736202	JUN	1	B1
hsa04530	Tight junction	1/76	161/8035	0.786816	0.856755	0.736202	JUN	1	B1
hsa05225	Hepatocellular carcinoma	1/76	168/8035	0.800814	0.859268	0.738361	GSTP1	1	B1
hsa05152	Tuberculosis	1/76	180/8035	0.822732	0.871897	0.749213	BCL2	1	B1
hsa04360	Axon guidance	1/76	181/8035	0.824447	0.871897	0.749213	PDK1	1	B1
hsa05034	Alcoholism	1/76	187/8035	0.834399	0.876119	0.752841	FOSB	1	B1
hsa04015	Rap1 signaling pathway	1/76	210/8035	0.86765	0.8909	0.765543	RASGRP3	1	B1
hsa04810	Regulation of actin cytoskeleton	1/76	214/8035	0.872719	0.8909	0.765543	ITGA6	1	B1
hsa04014	Ras signaling pathway	1/76	232/8035	0.893255	0.905576	0.778154	RASGRP3	1	B1
hsa05016	Huntington disease	1/76	306/8035	0.948441	0.954937	0.820569	ERN1	1	B1
hsa05165	Human papillomavirus infection	1/76	330/8035	0.959341	0.959341	0.824353	ITGA6	1	B1
hsa05168	Herpes simplex virus 1 infection	65/814	491/8035	0.0134814	0.0556347	0.0395749	SYK/HLA-A/HLA-B/HLA-DMB/HLA-DPB1/HLA-DRA/HLA-DRB5/PPP1CA/HLA-E/EIF2AK2/ZNF101/SRSF5/SP100/CD74/HLA-DQB1/HLA-DMA/SRSF9/PIK3R1/JAK1/OAS2/IRF9/SRSF3/HLA-DPA1/PIK3CA/STAT2/OAS1/ZNF107/ZNF439/SRSF4/STAT1/ZNF430/SRSF6/BAX/IKBKB/ZNF431/HLA-DOA/ZNF91/HLA-F/TP53/ZNF708/ZNF721/PIK3CD/BCL2L1/IFNAR1/ZNF506/TNFRSF14/ZNF254/IRAK4/TAPBP/MYD88/PML/AKT2/ZNF195/SRSF1/ZNF302/POU2F1/ZNF43/TAP1/ZNF26/ZNF224/ZNF33A/ZN…	65	B2
hsa05010	Alzheimer disease	60/814	369/8035	0.000123914	0.00125196	0.000890565	MME/SLC25A5/CSNK1E/SLC25A6/VDAC1/EIF2AK2/RB1CC1/CALM2/COX7C/CSNK2A1/ATP5F1C/PIK3R1/COX4I1/ADAM10/ATP5F1E/ATP5MC2/KIF5B/ATP2A3/COX6C/PIK3CA/ATP5F1B/CSNK2B/PSMA7/COX7A2L/IKBKB/CSNK1A1/COX7A2/ATP5F1A/ITPR2/MAPK1/TUBA1A/NDUFA4/PSEN1/COX6B1/ATP5PO/PSMB7/PIK3CD/UQCRC2/ATP5PB/PSMA4/CAPN1/PSMA2/IRS2/PSMD8/VDAC2/CTNNB1/TUBB6/AKT2/UQCRFS1/PSMA5/APC/NDUFA5/NDUFB8/NDUFA10/ADAM17/HSD17B10/RTN4/PPP3CA/RAF1/BEC…	60	B2
hsa03040	Spliceosome	59/814	149/8035	8.35e-22	2.45e-19	1.74e-19	HNRNPA1/CDC40/SYF2/DDX5/HNRNPA3/HNRNPK/HNRNPU/RBM25/SNRPD3/SRSF5/RBM8A/SRSF9/SF3B1/SRSF3/PRPF38B/HNRNPC/LSM7/PRPF40A/SRSF4/HNRNPM/SRSF6/TRA2B/SF3B6/U2SURP/SNRNP200/EIF4A3/TRA2A/SRSF10/HSPA8/SF3B2/RBMX/THOC2/SNRPB2/RBM17/TCERG1/ZMAT2/RBM22/SNRNP70/PCBP1/SF3B5/DDX46/SNRPD2/RP9/CDC5L/SRSF1/SLU7/BUD31/MAGOH/PRPF3/SNRPG/PRPF38A/DDX39B/SNRPB/SNRPE/ACIN1/CCDC12/THOC1/U2AF2/LSM8	59	B2
hsa04144	Endocytosis	58/814	248/8035	5.41e-10	7.54e-08	5.36e-08	ARPC3/HLA-A/HLA-B/RNF41/HLA-E/IGF2R/CXCR4/IQSEC1/CBLB/GRK2/ARPC2/TGFBR2/RAB11A/KIF5B/CDC42/SNX2/WASHC4/ARPC5/RHOA/GIT2/USP8/CHMP4A/ARAP2/SMAD2/HSPA8/SMURF2/HLA-F/SNX3/ARFGAP2/ACAP2/GRK3/PSD4/CLTA/ARF5/CYTH1/PIP5K1A/ARF1/SNX6/CAPZB/CHMP1B/SMAP1/SMAD3/RAB11FIP2/DNM2/PML/AP2M1/CAPZA2/VPS4B/SNF8/CHMP3/PDCD6IP/IST1/ARPC4/WIPF2/CAPZA1/EPS15/VPS35/AP2B1	58	B2
hsa05131	Shigellosis	54/814	242/8035	1.28e-08	5.35e-07	3.8e-07	WASF1/H3F3A/H3F3B/ARPC3/ACTB/WASF2/ROCK1/UBB/MYL12B/VDAC1/MYL12A/ACTG1/SKP1/GABARAPL2/PIK3R1/RPS27A/ARPC2/CDC42/FOXO1/PRKCE/PIK3CA/ARPC5/TIFA/RHOA/CBX3/BAX/UBE2D3/ATM/IKBKB/PFN1/ITPR2/MAPK1/TP53/CYTH1/PIK3CD/ARF1/RRAGC/HCLS1/ATG12/CAPN1/TLN1/BCL2L1/MYD88/ARHGEF2/AKT2/RRAGA/BCL10/FBXW11/RAC1/ARPC4/UBE2N/CRK/BECN1/PLCG2	54	B2
hsa05016	Huntington disease	51/814	306/8035	0.000215155	0.00185413	0.00131891	HIP1/SLC25A5/SLC25A6/VDAC1/RB1CC1/COX7C/ATP5F1C/COX4I1/ATP5F1E/ATP5MC2/KIF5B/COX6C/ATP5F1B/CREB1/PSMA7/COX7A2L/BAX/CREBBP/COX7A2/POLR2G/ATP5F1A/TUBA1A/NDUFA4/POLR2B/TP53/REST/CLTA/EP300/COX6B1/ATP5PO/PSMB7/UQCRC2/ATP5PB/PSMA4/PSMA2/PSMD8/VDAC2/IFT57/TUBB6/AP2M1/UQCRFS1/PSMA5/HDAC1/DCTN5/SIN3A/NDUFA5/NDUFB8/NDUFA10/HDAC2/BECN1/AP2B1	51	B2
hsa05166	Human T-cell leukemia virus 1 infection	50/814	219/8035	2.04e-08	7.46e-07	5.31e-07	TCF3/SLC25A5/HLA-A/HLA-B/HLA-DMB/SLC25A6/VDAC1/HLA-DPB1/HLA-DRA/HLA-DRB5/HLA-E/PTEN/HLA-DQB1/HLA-DMA/NFATC4/PIK3R1/JAK1/RB1/TGFBR2/ETS1/HLA-DPA1/PIK3CA/CREB1/SPI1/BAX/CREBBP/ATM/IKBKB/SMAD2/HLA-DOA/MAPK1/HLA-F/TP53/RAN/EP300/MAP3K1/PIK3CD/MAD1L1/SMAD4/ELK4/TLN1/BCL2L1/VDAC2/SMAD3/ATF6B/AKT2/DLG1/NFATC3/PPP3CA/TRRAP	50	B2
hsa05165	Human papillomavirus infection	50/814	330/8035	0.00222217	0.0125211	0.00890668	ATP6V1G1/HLA-A/HLA-B/UBE3A/MX1/HLA-E/EIF2AK2/PTEN/CDK6/CHD4/PIK3R1/ATP6V0B/JAK1/RB1/IRF9/CDC42/FOXO1/PIK3CA/ISG15/STAT2/CREB1/STAT1/LFNG/BAX/CREBBP/ATM/IKBKB/CSNK1A1/HES6/MAPK1/HLA-F/PSEN1/TP53/PPP2R5C/MFNG/EP300/PIK3CD/ATP6V1F/IFNAR1/CTNNB1/PPP2CA/AKT2/DLG1/NFX1/HDAC1/PPP2R5E/APC/PPP2R3B/HDAC2/RAF1	50	B2
hsa05169	Epstein-Barr virus infection	49/814	202/8035	3.4e-09	2.21e-07	1.57e-07	SYK/LYN/HLA-A/HLA-B/HLA-DMB/HLA-DPB1/HLA-DRA/BTK/HLA-DRB5/HLA-E/EIF2AK2/CD19/CDK6/HLA-DQB1/HLA-DMA/PIK3R1/JAK1/RB1/OAS2/IRF9/HLA-DPA1/PIK3CA/ISG15/STAT2/OAS1/STAT1/BAX/IKBKB/HLA-DOA/HLA-F/TP53/MAP2K3/PIK3CD/PSMD8/IFNAR1/USP7/IRAK4/TAPBP/MYD88/CIR1/AKT2/HDAC1/TAP1/SIN3A/RAC1/MAVS/IRF7/HDAC2/PLCG2	49	B2
hsa05164	Influenza A	45/814	170/8035	7.72e-10	7.54e-08	5.36e-08	PRKCB/ACTB/SLC25A5/HLA-DMB/SLC25A6/VDAC1/HLA-DPB1/ACTG1/HLA-DRA/HLA-DRB5/MX1/EIF2AK2/CIITA/CDK6/HLA-DQB1/HLA-DMA/PIK3R1/JAK1/ADAR/OAS2/RAB11A/PABPN1/IRF9/HLA-DPA1/PIK3CA/STAT2/OAS1/STAT1/BAX/CREBBP/IKBKB/HLA-DOA/MAPK1/EP300/PIK3CD/KPNA5/IFNAR1/TRIM25/IRAK4/MYD88/PML/AKT2/MAVS/IRF7/RAF1	45	B2
hsa05167	Kaposi sarcoma-associated herpesvirus infection	45/814	189/8035	2.77e-08	9.02e-07	6.42e-07	HCK/SYK/LYN/HLA-A/HLA-B/UBB/HLA-E/EIF2AK2/CALM2/GNB1/CDK6/NFATC4/GABARAPL2/GNB4/PIK3R1/RPS27A/JAK1/RB1/IRF9/PIK3CA/STAT2/GNG5/CREB1/STAT1/BAX/CREBBP/IKBKB/ITPR2/MAPK1/HLA-F/TP53/EP300/HIF1A/PIK3CD/IFNAR1/CTNNB1/AKT2/NFATC3/RAC1/IRF7/PPP3CA/RAF1/BECN1/PLCG2/GNB2	45	B2
hsa05203	Viral carcinogenesis	45/814	204/8035	3.05e-07	6.87e-06	4.88e-06	SYK/LYN/YWHAZ/HLA-A/HLA-B/UBE3A/HNRNPK/HLA-E/EIF2AK2/SP100/CDK6/CHD4/YWHAB/PIK3R1/JAK1/RB1/IRF9/CDC42/PIK3CA/YWHAQ/RHOA/CREB1/DDX3X/BAX/CREBBP/MAPK1/HLA-F/TP53/HIST1H4H/EP300/PIK3CD/MAD1L1/GTF2A2/HIST2H2BE/DDB1/USP7/ATF6B/YWHAE/DLG1/HDAC1/HIST1H2BD/RAC1/IRF7/HDAC7/HDAC2	45	B2
hsa05170	Human immunodeficiency virus 1 infection	45/814	212/8035	9.6e-07	2.01e-05	1.43e-05	PRKCB/HLA-A/HLA-B/CFL1/HLA-E/CALM2/GNB1/CXCR4/SKP1/NFATC4/GNB4/PAK2/PIK3R1/PIK3CA/LIMK1/AP1B1/GNG5/ELOB/BAX/ATM/IKBKB/ITPR2/MAPK1/HLA-F/CUL5/GNAI2/MAP2K3/PIK3CD/BCL2L1/AP1S2/DDB1/IRAK4/TAPBP/MYD88/AKT2/NFATC3/RNF7/TAP1/FBXW11/RAC1/CRK/PPP3CA/RAF1/PLCG2/GNB2	45	B2
hsa05132	Salmonella infection	44/814	213/8035	2.74e-06	5.35e-05	3.8e-05	ARPC3/ACTB/CYFIP2/MYL12B/MYL12A/PTPRC/ACTG1/SKP1/DYNC1H1/PIK3C2B/HSP90AA1/ARPC2/CDC42/PIK3CA/ARPC5/ABI1/RHOA/NCKAP1L/LEF1/BAX/IKBKB/PFN1/HSP90AB1/MAPK1/BRK1/MAP2K3/CYTH1/PIK3CD/GCC2/ARF1/EXOC5/EXOC7/DYNLL1/DNM2/IRAK4/MYD88/CTNNB1/AKT2/KPNA3/KPNA4/RAC1/ARPC4/BIRC2/RAF1	44	B2
hsa05012	Parkinson disease	44/814	249/8035	0.00015287	0.00144487	0.00102779	SLC25A5/UBB/SLC25A6/VDAC1/CAMK2D/CALM2/COX7C/ATP5F1C/COX4I1/RPS27A/ATP5F1E/ATP5MC2/KIF5B/COX6C/ATP5F1B/PSMA7/COX7A2L/BAX/PARK7/COX7A2/ATP5F1A/ITPR2/TUBA1A/NDUFA4/TP53/UBE2L6/COX6B1/ATP5PO/GNAI2/PSMB7/UQCRC2/ATP5PB/PSMA4/PSMA2/BCL2L1/PSMD8/VDAC2/TUBB6/UQCRFS1/PSMA5/NDUFA5/NDUFB8/NDUFA10/UBE2G2	44	B2
hsa03013	RNA transport	42/814	180/8035	1.48e-07	4.35e-06	3.09e-06	PNN/PABPC1/SAP18/CYFIP2/EIF4G2/EEF1A1/EIF3F/EIF1B/SUMO2/EIF3E/RBM8A/EIF5/EIF2S3/UBE2I/EIF3H/EIF4A2/SRRM1/NUP88/FXR1/EIF3D/TPR/EIF3A/EIF4A3/KPNB1/EIF3G/RAN/THOC2/UPF3A/STRAP/FMR1/NUP160/EIF1AX/EIF4B/MAGOH/UPF3B/EIF3I/DDX39B/ACIN1/EIF4G3/RNPS1/THOC1/SUMO1	42	B2
hsa04151	PI3K-Akt signaling pathway	40/814	354/8035	0.252145	0.496023	0.352838	TCL1A/SYK/MYB/YWHAZ/TCL1B/GNB1/PTEN/CD19/CDK6/PIK3AP1/YWHAB/HSP90AA1/GNB4/PIK3R1/JAK1/PIK3CA/YWHAQ/GNG5/CREB1/IKBKB/HSP90AB1/MAPK1/TP53/IL7R/CDC37/PPP2R5C/PIK3CD/BCL2L1/IFNAR1/ATF6B/PPP2CA/YWHAE/AKT2/EIF4B/PPP2R5E/RAC1/PKN2/PPP2R3B/RAF1/GNB2	40	B2
hsa04810	Regulation of actin cytoskeleton	39/814	214/8035	0.00018544	0.00169794	0.0012078	WASF1/ARPC3/ACTB/WASF2/ROCK1/CYFIP2/MYL12B/MYL12A/CFL1/ACTG1/PPP1CA/CXCR4/PAK2/PIK3R1/PPP1R12A/ARPC2/CDC42/PIK3CA/ARPC5/LIMK1/IQGAP1/RHOA/NCKAP1L/ARHGEF7/IQGAP2/PFN1/MAPK1/BRK1/PIK3CD/PIP5K1A/GNA13/ARHGEF6/MSN/APC/RAC1/ITGAE/ARPC4/CRK/RAF1	39	B2
hsa05163	Human cytomegalovirus infection	39/814	225/8035	0.000532241	0.00380358	0.00270562	PRKCB/ROCK1/HLA-A/HLA-B/HLA-E/CALM2/GNB1/CXCR4/CDK6/NFATC4/GNB4/PIK3R1/JAK1/RB1/PIK3CA/GNG5/RHOA/CREB1/BAX/IKBKB/ITPR2/MAPK1/HLA-F/TP53/GNAI2/PIK3CD/GNA13/ATF6B/TAPBP/CTNNB1/AKT2/NFATC3/AKAP13/TAP1/RAC1/CRK/PPP3CA/RAF1/GNB2	39	B2
hsa05206	MicroRNAs in cancer	37/814	310/8035	0.163582	0.359981	0.256067	ZEB2/SOX4/CDC25B/STMN1/FOXP1/MDM4/PRKCB/ROCK1/HNRNPK/DNMT3B/PTEN/CDK6/UBE2I/PIK3R1/PRKCE/PIK3CA/RHOA/CREBBP/ATM/IKBKB/MAPK1/DICER1/TP53/EP300/MARCKS/PIK3CD/SOCS1/IRS2/PDCD4/EZH2/HDAC1/APC/DNMT3A/CRK/HDAC2/RAF1/PLCG2	37	B2
hsa04714	Thermogenesis	36/814	231/8035	0.00556682	0.0263077	0.0187136	ARID1B/ACTB/SMARCA4/ACTG1/COX7C/ATP5MG/ATP5F1C/COX4I1/ATP5F1E/ATP5MC2/COX6C/ARID1A/SMARCC1/ATP5F1B/RPS6KA1/CREB1/SMARCE1/COX7A2L/COX7A2/ATP5F1A/SMARCB1/NDUFA4/COX6B1/ATP5PO/MAP2K3/ATP5MF/UQCRC2/ATP5PB/KDM3B/SMARCC2/UQCRFS1/SMARCD1/NDUFA5/NDUFB8/NDUFA10/NDUFAF3	36	B2
hsa04120	Ubiquitin mediated proteolysis	35/814	140/8035	2.81e-07	6.85e-06	4.87e-06	UBE3A/UBB/SKP1/SYVN1/UBE2I/CBLB/RPS27A/BIRC6/ELOB/UBE2D3/SMURF2/CUL3/UBE2L6/CUL5/MAP3K1/UBE2R2/SIAH1/SOCS1/UBE2B/UBE2W/HERC2/DDB1/UBE2F/TRIP12/PML/PIAS2/RNF7/FZR1/UBE2S/UBR5/FBXW11/UBA6/BIRC2/UBE2N/UBE2G2	35	B2
hsa04218	Cellular senescence	35/814	156/8035	4.23e-06	7.3e-05	5.19e-05	SLC25A5/HLA-A/HLA-B/SLC25A6/VDAC1/PPP1CA/HLA-E/CALM2/PTEN/CDK6/NFATC4/PIK3R1/RB1/TGFBR2/ETS1/FOXO1/PIK3CA/RBBP4/E2F5/ATM/SMAD2/ITPR2/MAPK1/HLA-F/TP53/MAP2K3/PIK3CD/CAPN1/VDAC2/SMAD3/AKT2/NFATC3/FBXW11/PPP3CA/RAF1	35	B2
hsa05161	Hepatitis B	35/814	162/8035	1.03e-05	0.000159006	0.000113106	PRKCB/YWHAZ/YWHAB/NFATC4/PIK3R1/JAK1/RB1/TGFBR2/PIK3CA/YWHAQ/STAT2/CREB1/STAT1/DDX3X/BAX/CREBBP/IKBKB/MAPK1/TP53/EP300/MAP2K3/MAP3K1/PIK3CD/SMAD4/IFNAR1/SMAD3/DDB1/ATF6B/IRAK4/MYD88/AKT2/NFATC3/MAVS/IRF7/RAF1	35	B2
hsa05225	Hepatocellular carcinoma	35/814	168/8035	2.36e-05	0.000307836	0.000218975	ARID1B/PRKCB/ACTB/SMARCA4/ACTG1/PTEN/CDK6/PIK3R1/RB1/TGFBR2/ARID1A/PIK3CA/SMARCC1/SMARCE1/LEF1/BAX/CSNK1A1/SMAD2/MAPK1/PBRM1/SMARCB1/TP53/PIK3CD/SMAD4/ARID2/BCL2L1/SMARCC2/SMAD3/CTNNB1/AKT2/APC/SMARCD1/PHF10/RAF1/PLCG2	35	B2
hsa05130	Pathogenic Escherichia coli infection	33/814	192/8035	0.00160779	0.00975251	0.0069373	WASF1/MYO1C/ARPC3/ACTB/WASF2/ROCK1/CYFIP2/ACTG1/NCL/PAK2/ARPC2/CDC42/ARPC5/ABI1/RHOA/NCKAP1L/BAX/IKBKB/MAPK1/TUBA1A/BRK1/CYTH1/ARF1/HCLS1/GNA13/IRAK4/MYD88/TUBB6/NCK2/ARHGEF2/RAC1/ARPC4/WIPF2	33	B2
hsa05202	Transcriptional misregulation in cancer	32/814	192/8035	0.00310426	0.015957	0.0113508	H3F3A/PAX5/H3F3B/TCF3/JMJD1C/DDX5/FUS/SMAD1/TGFBR2/NCOR1/FOXO1/EWSR1/SPI1/BAX/ATM/TP53/FLI1/ELK4/BCL2L1/RARA/NSD2/PML/HDAC1/KDM6A/KMT2A/MAX/SIN3A/ETV6/CDK9/BIRC2/TAF15/HDAC2	32	B2
hsa04010	MAPK signaling pathway	32/814	294/8035	0.359712	0.64046	0.455582	CDC25B/STMN1/PRKCB/MKNK2/PAK2/TGFBR2/CDC42/MAP4K2/RPS6KA1/MAP3K2/IKBKB/MAPK1/HSPA8/RASGRP1/TP53/MAP2K3/MAP3K1/TAOK1/RASGRP2/ELK4/RAP1B/IRAK4/MYD88/PPM1B/AKT2/NFATC3/TAOK3/MAX/RAC1/CRK/PPP3CA/RAF1	32	B2
hsa04666	Fc gamma R-mediated phagocytosis	30/814	93/8035	3.77e-09	2.21e-07	1.57e-07	HCK/WASF1/SYK/ARPC3/LYN/PRKCB/WASF2/PTPRC/CFL1/NCF1/INPP5D/PIK3R1/ARPC2/CDC42/PRKCE/PIK3CA/ARPC5/LIMK1/MARCKSL1/MAPK1/MARCKS/PIK3CD/PIP5K1A/DNM2/AKT2/RAC1/ARPC4/CRK/RAF1/PLCG2	30	B2
hsa05162	Measles	30/814	138/8035	3.87e-05	0.000435605	0.000309861	RACK1/MX1/EIF2AK2/CSNK2A1/CDK6/PIK3R1/CBLB/EIF3H/JAK1/ADAR/OAS2/IRF9/PIK3CA/STAT2/OAS1/CSNK2B/STAT1/BAX/IKBKB/HSPA8/TP53/PIK3CD/BCL2L1/IFNAR1/IRAK4/MYD88/AKT2/MSN/MAVS/IRF7	30	B2
hsa05160	Hepatitis C	30/814	155/8035	0.000350116	0.00269749	0.00191882	CD81/YWHAZ/MX1/EIF2AK2/EIF3E/CDK6/YWHAB/PIK3R1/JAK1/RB1/OAS2/IRF9/PIK3CA/YWHAQ/STAT2/OAS1/STAT1/BAX/IKBKB/MAPK1/TP53/PIK3CD/IFNAR1/CTNNB1/PPP2CA/YWHAE/AKT2/MAVS/IRF7/RAF1	30	B2
hsa03015	mRNA surveillance pathway	29/814	91/8035	9.39e-09	4.59e-07	3.26e-07	MSI2/PNN/RNGTT/PABPC1/SAP18/PPP1CA/SMG1/RBM8A/PAPOLA/PABPN1/SRRM1/FIP1L1/EIF4A3/PPP2R5C/SMG7/RNMT/UPF3A/PPP2CA/PCF11/HBS1L/MAGOH/PPP2R5E/UPF3B/DDX39B/ACIN1/SYMPK/RNPS1/PPP2R3B/WDR82	29	B2
hsa04068	FoxO signaling pathway	29/814	131/8035	3.64e-05	0.000426199	0.00030317	CDKN2D/RAG1/CSNK1E/RAG2/S1PR4/PTEN/FBXO25/CCNG2/GABARAPL2/PIK3R1/S1PR1/TGFBR2/FOXO1/PIK3CA/CREBBP/ATM/IKBKB/MAPK1/IL7R/EP300/PIK3CD/SMAD4/CAT/ATG12/IRS2/SMAD3/USP7/AKT2/RAF1	29	B2
hsa04217	Necroptosis	29/814	159/8035	0.00118306	0.00770305	0.00547944	HIST1H2AC/HMGB1/SLC25A5/GLUL/SLC25A6/VDAC1/CAMK2D/EIF2AK2/PARP1/HSP90AA1/PPIA/JAK1/IRF9/STAT2/H2AFV/STAT1/HIST2H2AC/BAX/CHMP4A/HSP90AB1/H2AFY/CAPN1/CHMP1B/IFNAR1/VDAC2/VPS4B/CHMP3/DNM1L/BIRC2	29	B2
hsa04022	cGMP-PKG signaling pathway	29/814	167/8035	0.00256772	0.0141952	0.0100975	SLC25A5/ROCK1/RGS2/SLC25A6/GTF2I/VDAC1/PPP1CA/CALM2/NFATC4/PPP1R12A/ATP2A3/PRKCE/MEF2D/RHOA/CREB1/MEF2A/ITPR2/MAPK1/GNAI2/NPPC/GNA13/IRS2/VDAC2/ATF6B/AKT2/NFATC3/ATP1B3/PPP3CA/RAF1	29	B2
hsa05152	Tuberculosis	29/814	180/8035	0.00767781	0.0342266	0.0243465	SYK/HLA-DMB/HLA-DPB1/HLA-DRA/CAMK2D/HLA-DRB5/CIITA/CALM2/CD74/HLA-DQB1/HLA-DMA/ATP6V0B/JAK1/HLA-DPA1/RHOA/CREB1/STAT1/BAX/CREBBP/HLA-DOA/MAPK1/VDR/EP300/IRAK4/MYD88/AKT2/BCL10/PPP3CA/RAF1	29	B2
hsa04621	NOD-like receptor signaling pathway	29/814	181/8035	0.00828939	0.0357175	0.0254071	VDAC1/HSP90AA1/GABARAPL2/JAK1/OAS2/IRF9/IFI16/STAT2/OAS1/RHOA/STAT1/IKBKB/HSP90AB1/ITPR2/MAPK1/ATG12/BCL2L1/IFNAR1/VDAC2/ERBIN/IRAK4/MYD88/YWHAE/TP53BP1/DNM1L/MAVS/PKN2/IRF7/BIRC2	29	B2
hsa05205	Proteoglycans in cancer	29/814	205/8035	0.0394975	0.123846	0.0880956	PRKCB/ACTB/ROCK1/DDX5/ACTG1/CAMK2D/PPP1CA/PIK3R1/PPP1R12A/CDC42/PIK3CA/IQGAP1/RHOA/SMAD2/ITPR2/MAPK1/TP53/HIF1A/PIK3CD/HCLS1/CTNNB1/PDCD4/AKT2/MSN/EIF4B/NUDT16L1/RAC1/RAF1/PLCG2	29	B2
hsa04919	Thyroid hormone signaling pathway	28/814	121/8035	2.09e-05	0.000291996	0.000207707	PRKCB/ACTB/ACTG1/PIK3R1/ATP2A3/NCOR1/FOXO1/PIK3CA/NCOA3/STAT1/CREBBP/MAPK1/TP53/EP300/HIF1A/PIK3CD/NCOA2/PFKL/MED1/MED30/CTNNB1/AKT2/HDAC1/SIN3A/ATP1B3/HDAC2/RAF1/PLCG2	28	B2
hsa04611	Platelet activation	28/814	124/8035	3.38e-05	0.000412096	0.000293138	SYK/LYN/VAMP8/APBB1IP/ACTB/ROCK1/MYL12B/MYL12A/ACTG1/BTK/PPP1CA/PIK3R1/PPP1R12A/PIK3CA/RHOA/ITPR2/MAPK1/RASGRP1/GNAI2/PIK3CD/RASGRP2/RAP1B/GNA13/TLN1/AKT2/STIM1/SNAP23/PLCG2	28	B2
hsa04310	Wnt signaling pathway	28/814	160/8035	0.00269079	0.0146	0.0103855	PRKCB/CSNK1E/CAMK2D/ROR1/CSNK2A1/SKP1/NFATC4/CSNK2B/TBL1XR1/RHOA/SERPINF1/DAAM1/LEF1/CREBBP/CSNK1A1/PSEN1/CHD8/TP53/EP300/SMAD4/SIAH1/SMAD3/CTNNB1/NFATC3/APC/FBXW11/RAC1/PPP3CA	28	B2
hsa04062	Chemokine signaling pathway	28/814	189/8035	0.0251314	0.0876605	0.062356	HCK/LYN/PRKCB/ROCK1/NCF1/GNB1/CXCR4/GNB4/PIK3R1/GRK2/CDC42/PIK3CA/STAT2/GNG5/RHOA/STAT1/IKBKB/MAPK1/GRK3/GNAI2/PIK3CD/RASGRP2/RAP1B/AKT2/RAC1/CRK/RAF1/GNB2	28	B2
hsa05135	Yersinia infection	27/814	130/8035	0.000208784	0.00185375	0.00131864	ACTB/WASF2/ROCK1/ACTG1/ACTR2/PIK3R1/CDC42/PIK3CA/LIMK1/RHOA/RPS6KA1/GIT2/ARHGEF7/IKBKB/MAPK1/MAP2K3/PIK3CD/PIP5K1A/IRAK4/MYD88/AKT2/NFATC3/ACTR3/RAC1/PKN2/WIPF2/CRK	27	B2
hsa03010	Ribosome	27/814	158/8035	0.00445749	0.0217674	0.0154839	RPS11/RPL15/RPS24/FAU/RPL7/RPL13A/RPS16/RPL10/RPS13/RPL26/RPS23/RPS27A/RPS3A/RPL19/RPL22/RPS19/RPL31/RPL11/RPL6/RPL4/RPL27/RPL5/RPL18/RSL24D1/MRPS6/MRPL16/MRPS18C	27	B2
hsa04014	Ras signaling pathway	27/814	232/8035	0.249122	0.496023	0.352838	RAPGEF5/PRKCB/RALBP1/CALM2/GNB1/SHOC2/GNB4/PAK2/PIK3R1/RASAL1/ETS1/CDC42/PIK3CA/GNG5/RHOA/IKBKB/MAPK1/RASGRP1/PIK3CD/RASGRP2/RAP1B/BCL2L1/AKT2/RAC1/RAF1/PLCG2/GNB2	27	B2
hsa04722	Neurotrophin signaling pathway	26/814	119/8035	0.000114494	0.00119809	0.000852246	CAMK2D/ARHGDIB/CALM2/PIK3R1/CDC42/PIK3CA/RHOA/RPS6KA1/BAX/SH2B3/IKBKB/MAPK1/PSEN1/TP53/MAP3K1/PIK3CD/RAP1B/IRAK4/ZNF274/YWHAE/AKT2/KIDINS220/RAC1/CRK/RAF1/PLCG2	26	B2
hsa04662	B cell receptor signaling pathway	25/814	82/8035	2.6e-07	6.85e-06	4.87e-06	CD79B/SYK/CD72/CD81/LYN/PRKCB/BTK/CD19/INPP5D/PIK3AP1/PIK3R1/PIK3CA/CD22/CD79A/IKBKB/MAPK1/PIK3CD/CARD11/AKT2/BCL10/NFATC3/RAC1/PPP3CA/RAF1/PLCG2	25	B2
hsa00190	Oxidative phosphorylation	25/814	133/8035	0.00163097	0.00975251	0.0069373	LHPP/ATP6V1G1/COX7C/ATP5MG/ATP5F1C/ATP6V0B/COX4I1/ATP5F1E/ATP5MC2/COX6C/ATP5F1B/COX7A2L/COX7A2/ATP5F1A/NDUFA4/COX6B1/ATP5PO/ATP5MF/UQCRC2/ATP5PB/ATP6V1F/UQCRFS1/NDUFA5/NDUFB8/NDUFA10	25	B2
hsa04510	Focal adhesion	25/814	201/8035	0.163074	0.359981	0.256067	PRKCB/ACTB/ROCK1/MYL12B/MYL12A/ACTG1/PPP1CA/PTEN/PAK2/PIK3R1/PPP1R12A/CDC42/PIK3CA/RHOA/MAPK1/PIK3CD/PIP5K1A/RAP1B/TLN1/CTNNB1/AKT2/RAC1/BIRC2/CRK/RAF1	25	B2
hsa04110	Cell cycle	24/814	124/8035	0.00132241	0.00842315	0.00599168	CDC25B/TFDP2/CDKN2D/YWHAZ/CDK6/SKP1/YWHAB/RB1/YWHAQ/E2F5/CREBBP/ATM/SMAD2/TP53/STAG2/EP300/RAD21/MAD1L1/SMAD4/SMAD3/YWHAE/HDAC1/FZR1/HDAC2	24	B2
hsa04140	Autophagy - animal	24/814	137/8035	0.00516791	0.0248229	0.0176574	VAMP8/HMGB1/RB1CC1/PTEN/GABARAPL2/PIK3R1/PIK3CA/MAPK1/UVRAG/HIF1A/PIK3CD/RRAGC/ATG12/BCL2L1/IRS2/ATG4D/IGBP1/PPP2CA/AKT2/RRAGA/RAF1/SUPT20H/BECN1/MTMR4	24	B2
hsa04145	Phagosome	24/814	152/8035	0.0181999	0.0667273	0.0474655	STX7/ATP6V1G1/ACTB/HLA-A/HLA-B/HLA-DMB/HLA-DPB1/ACTG1/HLA-DRA/HLA-DRB5/HLA-E/NCF1/DYNC1H1/HLA-DQB1/HLA-DMA/ATP6V0B/HLA-DPA1/HLA-DOA/TUBA1A/HLA-F/ATP6V1F/TUBB6/TAP1/RAC1	24	B2
hsa04015	Rap1 signaling pathway	24/814	210/8035	0.295618	0.566119	0.4027	RAPGEF5/PRKCB/APBB1IP/ACTB/ACTG1/CALM2/PIK3R1/CDC42/PIK3CA/EVL/RHOA/PFN1/MAPK1/GNAI2/MAP2K3/PIK3CD/RASGRP2/RAP1B/TLN1/CTNNB1/AKT2/RAC1/CRK/RAF1	24	B2
hsa04659	Th17 cell differentiation	23/814	107/8035	0.000359051	0.00269749	0.00191882	IRF4/HLA-DMB/HLA-DPB1/HLA-DRA/HLA-DRB5/HLA-DQB1/HLA-DMA/HSP90AA1/JAK1/TGFBR2/HLA-DPA1/STAT1/IKBKB/HSP90AB1/SMAD2/HLA-DOA/MAPK1/HIF1A/SMAD4/SMAD3/RARA/NFATC3/PPP3CA	23	B2
hsa04932	Non-alcoholic fatty liver disease (NAFLD)	23/814	149/8035	0.0260955	0.087885	0.0625156	MLXIP/COX7C/PIK3R1/COX4I1/CDC42/COX6C/PIK3CA/COX7A2L/BAX/IKBKB/COX7A2/NDUFA4/COX6B1/PIK3CD/UQCRC2/IRS2/AKT2/ADIPOR2/UQCRFS1/RAC1/NDUFA5/NDUFB8/NDUFA10	23	B2
hsa04150	mTOR signaling pathway	23/814	155/8035	0.0390519	0.123846	0.0880956	PRKCB/ATP6V1G1/LAMTOR5/PTEN/PIK3R1/PIK3CA/FLCN/RHOA/RPS6KA1/IKBKB/MAPK1/PIK3CD/RRAGC/ATP6V1F/FNIP1/LAMTOR4/AKT2/RRAGA/EIF4B/RICTOR/TBC1D7/LPIN2/RAF1	23	B2
hsa04530	Tight junction	23/814	161/8035	0.0562485	0.168171	0.119626	YBX3/ACTB/ROCK1/MYL12B/MYL12A/ACTG1/ACTR2/MYL6/CDC42/PRKCE/HSPA4/RHOA/ARHGAP17/TUBA1A/MAP3K1/HCLS1/PPP2CA/ARHGEF2/DLG1/MSN/ACTR3/SYMPK/RAC1	23	B2
hsa05034	Alcoholism	23/814	187/8035	0.189398	0.399234	0.283989	H3F3A/HIST1H2AC/H3F3B/PPP1CA/CALM2/GNB1/GNB4/GNG5/CREB1/H2AFV/HIST2H2AC/MAPK1/H2AFY/HIST1H4H/GNAI2/HIST2H2BE/ATF6B/HDAC1/HIST1H2BD/HDAC7/HDAC2/RAF1/GNB2	23	B2
hsa05212	Pancreatic cancer	22/814	76/8035	3.56e-06	6.52e-05	4.64e-05	RALBP1/CDK6/PIK3R1/JAK1/RB1/TGFBR2/CDC42/PIK3CA/STAT1/BAX/IKBKB/SMAD2/MAPK1/TP53/PIK3CD/SMAD4/BCL2L1/SMAD3/ARHGEF6/AKT2/RAC1/RAF1	22	B2
hsa04612	Antigen processing and presentation	22/814	78/8035	5.7e-06	9.28e-05	6.6e-05	HLA-A/HLA-B/HLA-DMB/HLA-DPB1/HLA-DRA/HLA-DRB5/HLA-E/CIITA/PSME1/CD74/HLA-DQB1/HLA-DMA/HSP90AA1/HLA-DPA1/HSPA4/CREB1/HSP90AB1/HLA-DOA/HSPA8/HLA-F/TAPBP/TAP1	22	B2
hsa05145	Toxoplasmosis	22/814	112/8035	0.00169522	0.00993398	0.00706638	HLA-DMB/HLA-DPB1/HLA-DRA/HLA-DRB5/CIITA/HLA-DQB1/HLA-DMA/JAK1/HLA-DPA1/STAT1/IKBKB/HLA-DOA/MAPK1/HSPA8/GNAI2/MAP2K3/SOCS1/BCL2L1/IRAK4/MYD88/AKT2/BIRC2	22	B2
hsa04071	Sphingolipid signaling pathway	22/814	119/8035	0.00373737	0.0185602	0.0132025	PRKCB/ROCK1/S1PR4/PTEN/PIK3R1/S1PR1/PRKCE/PIK3CA/RHOA/BAX/MAPK1/TP53/PPP2R5C/GNAI2/PIK3CD/GNA13/PPP2CA/AKT2/PPP2R5E/RAC1/PPP2R3B/RAF1	22	B2
hsa04390	Hippo signaling pathway	22/814	157/8035	0.0721294	0.197733	0.140654	YWHAZ/ACTB/CSNK1E/SMAD1/ACTG1/PPP1CA/YWHAB/TGFBR2/MOB1A/YWHAQ/LEF1/SMAD2/SMAD7/SMAD4/SMAD3/CTNNB1/PPP2CA/YWHAE/DLG1/APC/FBXW11/BIRC2	22	B2
hsa04360	Axon guidance	22/814	181/8035	0.211679	0.436774	0.310692	ROCK1/MYL12B/MYL12A/CFL1/CAMK2D/CXCR4/NFATC4/PAK2/PIK3R1/CDC42/PIK3CA/LIMK1/RHOA/MAPK1/GNAI2/PIK3CD/NCK2/NFATC3/RAC1/PPP3CA/RAF1/PLCG2	22	B2
hsa04380	Osteoclast differentiation	21/814	128/8035	0.0175619	0.0659695	0.0469264	SYK/BTK/NCF1/PIK3R1/JAK1/TGFBR2/IRF9/PIK3CA/STAT2/CREB1/SPI1/STAT1/IKBKB/MAPK1/PIK3CD/SOCS1/IFNAR1/AKT2/RAC1/PPP3CA/PLCG2	21	B2
hsa05017	Spinocerebellar ataxia	21/814	133/8035	0.0260076	0.087885	0.0625156	PRKCB/RB1CC1/PIK3R1/VLDLR/ATP2A3/PIK3CA/PSMA7/ITPR2/PSMB7/PIK3CD/PSMA4/PUM1/PSMA2/PSMD8/NOP56/ATXN2/AKT2/PSMA5/ATXN3/PUM2/BECN1	21	B2
hsa04921	Oxytocin signaling pathway	21/814	154/8035	0.0967238	0.244311	0.173787	CD38/PRKCB/ACTB/ROCK1/RGS2/ACTG1/CAMK2D/PPP1CA/EEF2/CALM2/MYL6/NFATC4/PPP1R12A/RHOA/CAMK1D/ITPR2/MAPK1/GNAI2/NFATC3/PPP3CA/RAF1	21	B2
hsa04141	Protein processing in endoplasmic reticulum	21/814	167/8035	0.175158	0.374607	0.266471	ERP29/EIF2AK2/SKP1/SYVN1/HSP90AA1/TRAM1/DNAJA1/ERO1B/BAX/UBE2D3/HSP90AB1/HSPA8/BAG1/MBTPS1/NGLY1/CAPN1/STT3B/ATF6B/DNAJA2/ATXN3/UBE2G2	21	B2
hsa04024	cAMP signaling pathway	21/814	216/8035	0.613933	0.903751	0.64287	ROCK1/CAMK2D/PPP1CA/CALM2/PIK3R1/PPP1R12A/ATP2A3/PIK3CA/RHOA/CREB1/CREBBP/PDE4D/MAPK1/EP300/GNAI2/PIK3CD/RAP1B/AKT2/RAC1/ATP1B3/RAF1	21	B2
hsa04520	Adherens junction	20/814	71/8035	1.54e-05	0.000225866	0.000160666	WASF1/ACTB/WASF2/ACTG1/CSNK2A1/TGFBR2/CDC42/IQGAP1/CSNK2B/RHOA/LEF1/CREBBP/MAPK1/PTPRJ/EP300/SMAD4/SSX2IP/SMAD3/CTNNB1/RAC1	20	B2
hsa05100	Bacterial invasion of epithelial cells	20/814	73/8035	2.42e-05	0.000307836	0.000218975	WASF1/ARPC3/ACTB/WASF2/ACTG1/PIK3R1/ARPC2/CDC42/PIK3CA/ARPC5/RHOA/CLTA/PIK3CD/HCLS1/DNM2/CTNNB1/CD2AP/RAC1/ARPC4/CRK	20	B2
hsa04625	C-type lectin receptor signaling pathway	20/814	104/8035	0.00349023	0.0176317	0.012542	SYK/CALM2/NFATC4/PIK3R1/CBLB/IRF9/PIK3CA/STAT2/RHOA/STAT1/IKBKB/ITPR2/MAPK1/PIK3CD/AKT2/BCL10/NFATC3/PPP3CA/RAF1/PLCG2	20	B2
hsa04935	Growth hormone synthesis, secretion and action	20/814	119/8035	0.0157569	0.0632435	0.0449873	PRKCB/PIK3R1/PIK3CA/CREB1/STAT1/CREBBP/ITPR2/MAPK1/EP300/GNAI2/MAP2K3/MAP3K1/PIK3CD/SOCS1/IRS2/ATF6B/AKT2/CRK/RAF1/PLCG2	20	B2
hsa04210	Apoptosis	20/814	136/8035	0.0559266	0.168171	0.119626	HRK/ACTB/ACTG1/PARP1/PIK3R1/PIK3CA/SPTA1/BAX/ATM/IKBKB/ITPR2/MAPK1/TUBA1A/TP53/PIK3CD/CAPN1/BCL2L1/AKT2/BIRC2/RAF1	20	B2
hsa05322	Systemic lupus erythematosus	20/814	136/8035	0.0559266	0.168171	0.119626	H3F3A/HIST1H2AC/H3F3B/HLA-DMB/HLA-DPB1/HLA-DRA/HLA-DRB5/SNRPD3/HLA-DQB1/HLA-DMA/HLA-DPA1/H2AFV/HIST2H2AC/HLA-DOA/H2AFY/HIST1H4H/HIST2H2BE/SSB/HIST1H2BD/SNRPB	20	B2
hsa04371	Apelin signaling pathway	20/814	137/8035	0.0595463	0.175786	0.125042	CALM2/GNB1/GABARAPL2/GNB4/MYL4/PRKCE/MEF2D/GNG5/MEF2A/SMAD2/ITPR2/MAPK1/GNAI2/SMAD4/GNA13/SMAD3/AKT2/RAF1/BECN1/GNB2	20	B2
hsa05418	Fluid shear stress and atherosclerosis	20/814	139/8035	0.0672692	0.187713	0.133527	ACTB/ACTG1/CALM2/SUMO2/NCF1/HSP90AA1/PIK3R1/PIK3CA/RHOA/MEF2A/IKBKB/HSP90AB1/TP53/PIK3CD/NPPC/CTNNB1/ARHGEF2/AKT2/RAC1/SUMO1	20	B2
hsa05220	Chronic myeloid leukemia	19/814	76/8035	0.000148454	0.00144487	0.00102779	CDK6/PIK3R1/RB1/TGFBR2/PIK3CA/BCR/BAX/IKBKB/MAPK1/TP53/PIK3CD/SMAD4/BCL2L1/SMAD3/AKT2/HDAC1/CRK/HDAC2/RAF1	19	B2
hsa03018	RNA degradation	19/814	79/8035	0.000256023	0.00208374	0.00148224	BTG1/PABPC1/ZCCHC7/BTG2/DHX36/LSM7/CNOT8/DDX6/DCP2/PFKL/PAN3/CNOT4/XRN2/PNPT1/CNOT2/CNOT7/CNOT1/C1D/LSM8	19	B2
hsa04660	T cell receptor signaling pathway	19/814	104/8035	0.00770974	0.0342266	0.0243465	PTPRC/PAK2/PIK3R1/CBLB/CDC42/PIK3CA/RHOA/IKBKB/MAPK1/RASGRP1/PIK3CD/CARD11/NCK2/AKT2/DLG1/BCL10/NFATC3/PPP3CA/RAF1	19	B2
hsa04670	Leukocyte transendothelial migration	19/814	113/8035	0.0182191	0.0667273	0.0474655	PRKCB/ACTB/ROCK1/MYL12B/MYL12A/ACTG1/NCF1/CXCR4/PIK3R1/CDC42/PIK3CA/RHOA/GNAI2/PIK3CD/RAP1B/CTNNB1/MSN/RAC1/PLCG2	19	B2
hsa04728	Dopaminergic synapse	19/814	132/8035	0.0728844	0.197733	0.140654	PRKCB/CAMK2D/PPP1CA/CALM2/GNB1/GNB4/KIF5B/GNG5/CREB1/ITPR2/PPP2R5C/GNAI2/ATF6B/PPP2CA/AKT2/PPP2R5E/PPP2R3B/PPP3CA/GNB2	19	B2
hsa04550	Signaling pathways regulating pluripotency of stem cells	19/814	143/8035	0.132218	0.314959	0.224041	TCF3/SMAD1/PIK3R1/JARID2/JAK1/PIK3CA/SMAD2/MAPK1/REST/PIK3CD/SMAD4/KAT6A/SMAD3/CTNNB1/PCGF5/AKT2/SKIL/APC/RAF1	19	B2
hsa04020	Calcium signaling pathway	19/814	196/8035	0.616895	0.903751	0.64287	CD38/STIM2/PRKCB/SLC25A5/SLC25A6/VDAC1/CAMK2D/ORAI2/CALM2/CXCR4/ATP2A3/PHKB/CAMK1D/ITPR2/VDAC2/P2RX5/STIM1/PPP3CA/PLCG2	19	B2
hsa05210	Colorectal cancer	18/814	86/8035	0.00208601	0.0119843	0.00852485	PIK3R1/TGFBR2/PIK3CA/RHOA/LEF1/BAX/MSH3/SMAD2/MAPK1/TP53/PIK3CD/SMAD4/SMAD3/CTNNB1/AKT2/APC/RAC1/RAF1	18	B2
hsa05235	PD-L1 expression and PD-1 checkpoint pathway in cancer	18/814	89/8035	0.00310191	0.015957	0.0113508	PTEN/CSNK2A1/PIK3R1/JAK1/PIK3CA/CSNK2B/STAT1/IKBKB/MAPK1/RASGRP1/MAP2K3/HIF1A/PIK3CD/MYD88/AKT2/NFATC3/PPP3CA/RAF1	18	B2
hsa05215	Prostate cancer	18/814	97/8035	0.00795154	0.0347732	0.0247354	PTEN/HSP90AA1/PIK3R1/RB1/FOXO1/PIK3CA/CREB1/LEF1/CREBBP/IKBKB/HSP90AB1/MAPK1/TP53/EP300/PIK3CD/CTNNB1/AKT2/RAF1	18	B2
hsa04064	NF-kappa B signaling pathway	18/814	104/8035	0.0160669	0.0636163	0.0452525	SYK/LYN/PRKCB/BTK/CSNK2A1/PARP1/UBE2I/CSNK2B/ATM/IKBKB/CARD11/BCL2L1/TRIM25/IRAK4/MYD88/BCL10/BIRC2/PLCG2	18	B2
hsa04910	Insulin signaling pathway	18/814	137/8035	0.150603	0.344741	0.245226	PPP1CA/CALM2/MKNK2/PIK3R1/CBLB/FOXO1/PIK3CA/PHKB/IKBKB/MAPK1/PIK3CD/PRKAR1A/SOCS1/IRS2/EXOC7/AKT2/CRK/RAF1	18	B2
hsa05416	Viral myocarditis	17/814	60/8035	6.13e-05	0.000665264	0.000473225	ACTB/HLA-A/HLA-B/HLA-DMB/EIF4G2/HLA-DPB1/ACTG1/HLA-DRA/HLA-DRB5/HLA-E/HLA-DQB1/HLA-DMA/HLA-DPA1/HLA-DOA/HLA-F/EIF4G3/RAC1	17	B2
hsa05211	Renal cell carcinoma	17/814	69/8035	0.000393969	0.00288582	0.00205278	PAK2/PIK3R1/ETS1/CDC42/PIK3CA/FLCN/ELOB/CREBBP/MAPK1/EP300/HIF1A/PIK3CD/RAP1B/AKT2/RAC1/CRK/RAF1	17	B2
hsa05140	Leishmaniasis	17/814	77/8035	0.00149425	0.00931521	0.00662623	PRKCB/HLA-DMB/EEF1A1/HLA-DPB1/HLA-DRA/HLA-DRB5/NCF1/HLA-DQB1/HLA-DMA/JAK1/HLA-DPA1/STAT1/MARCKSL1/HLA-DOA/MAPK1/IRAK4/MYD88	17	B2
hsa04070	Phosphatidylinositol signaling system	17/814	97/8035	0.0168842	0.0659609	0.0469203	PRKCB/DGKD/MTMR1/CALM2/PTEN/INPP5D/PIK3C2B/PIK3R1/PIK3CA/ITPR2/PIK3CD/PIP5K1A/DGKZ/MTMR6/PPIP5K2/PLCG2/MTMR4	17	B2
hsa05231	Choline metabolism in cancer	17/814	98/8035	0.0185707	0.0671756	0.0477843	WASF1/PRKCB/WASF2/DGKD/PIK3R1/PIK3CA/SLC44A2/MAPK1/HIF1A/PIK3CD/PIP5K1A/DGKZ/AKT2/LYPLA1/RAC1/CHPT1/RAF1	17	B2
hsa04933	AGE-RAGE signaling pathway in diabetic complications	17/814	100/8035	0.0223295	0.079787	0.0567552	PRKCB/PIK3R1/TGFBR2/CDC42/FOXO1/PRKCE/PIK3CA/STAT1/BAX/SMAD2/MAPK1/PIK3CD/SMAD4/SMAD3/AKT2/RAC1/PLCG2	17	B2
hsa04152	AMPK signaling pathway	17/814	120/8035	0.0966443	0.244311	0.173787	TBC1D1/EEF2/PIK3R1/FOXO1/PIK3CA/CREB1/PPP2R5C/PIK3CD/PFKL/IRS2/PPP2CA/RAB14/AKT2/ADIPOR2/PPP2R5E/ELAVL1/PPP2R3B	17	B2
hsa04114	Oocyte meiosis	17/814	128/8035	0.148621	0.342883	0.243904	YWHAZ/CAMK2D/PPP1CA/CALM2/SKP1/YWHAB/YWHAQ/RPS6KA1/ITPR2/MAPK1/PPP2R5C/MAD1L1/PPP2CA/YWHAE/PPP2R5E/FBXW11/PPP3CA	17	B2
hsa04915	Estrogen signaling pathway	17/814	138/8035	0.231152	0.470331	0.334562	CALM2/HSP90AA1/PIK3R1/PIK3CA/NCOA3/CREB1/HSP90AB1/ITPR2/MAPK1/HSPA8/GNAI2/PIK3CD/NCOA2/RARA/ATF6B/AKT2/RAF1	17	B2
hsa04514	Cell adhesion molecules (CAMs)	17/814	148/8035	0.32881	0.617573	0.439301	HLA-A/HLA-B/HLA-DMB/PTPRC/HLA-DPB1/HLA-DRA/HLA-DRB5/HLA-E/HLA-DQB1/HLA-DMA/HLA-DPA1/CD22/MPZL1/HLA-DOA/HLA-F/ICOSLG/SPN	17	B2
hsa05226	Gastric cancer	17/814	149/8035	0.339149	0.619602	0.440745	PIK3R1/RB1/TGFBR2/PIK3CA/LEF1/BAX/CSNK1A1/SMAD2/MAPK1/TP53/PIK3CD/SMAD4/SMAD3/CTNNB1/AKT2/APC/RAF1	17	B2
hsa04630	JAK-STAT signaling pathway	17/814	162/8035	0.477279	0.781245	0.555726	PIK3R1/JAK1/IRF9/PTPN2/PIK3CA/STAT2/STAT1/CREBBP/IL7R/EP300/PIK3CD/SOCS1/BCL2L1/IFNAR1/AKT2/PIAS2/RAF1	17	B2
hsa00310	Lysine degradation	16/814	61/8035	0.000269804	0.00213655	0.0015198	KMT2E/COLGALT1/SETD2/NSD1/KMT5B/PRDM2/ASH1L/KMT2C/HADHA/PHYKPL/NSD2/EHMT1/EZH2/KMT2A/DHTKD1/EZH1	16	B2
hsa05214	Glioma	16/814	75/8035	0.00295049	0.0157181	0.0111808	PRKCB/CAMK2D/CALM2/PTEN/CDK6/PIK3R1/RB1/PIK3CA/BAX/CAMK1D/MAPK1/TP53/PIK3CD/AKT2/RAF1/PLCG2	16	B2
hsa04350	TGF-beta signaling pathway	16/814	94/8035	0.0258675	0.087885	0.0625156	ROCK1/SMAD1/SKP1/TGFBR2/E2F5/RHOA/CREBBP/SMAD2/MAPK1/SMURF2/TGIF1/EP300/SMAD7/SMAD4/SMAD3/PPP2CA	16	B2
hsa04640	Hematopoietic cell lineage	16/814	99/8035	0.039732	0.123846	0.0880956	MME/CD24/CD38/CD37/CD9/HLA-DMB/HLA-DPB1/HLA-DRA/HLA-DRB5/CD19/HLA-DQB1/HLA-DMA/HLA-DPA1/CD22/HLA-DOA/IL7R	16	B2
hsa05224	Breast cancer	16/814	147/8035	0.419943	0.711232	0.505924	PTEN/CDK6/PIK3R1/RB1/PIK3CA/NCOA3/LEF1/BAX/CSNK1A1/MAPK1/TP53/PIK3CD/CTNNB1/AKT2/APC/RAF1	16	B2
hsa04072	Phospholipase D signaling pathway	16/814	148/8035	0.430989	0.725746	0.516248	SYK/DGKD/PIK3R1/PIK3CA/RHOA/MAPK1/CYTH1/PIK3CD/PIP5K1A/ARF1/GNA13/DGKZ/DNM2/AKT2/RAF1/PLCG2	16	B2
hsa04928	Parathyroid hormone synthesis, secretion and action	15/814	106/8035	0.114285	0.276741	0.196855	PRKCB/NACA/MEF2D/RHOA/CREB1/PDE4D/MEF2A/ITPR2/MAPK1/VDR/GNAI2/GNA13/ATF6B/AKAP13/RAF1	15	B2
hsa04931	Insulin resistance	15/814	108/8035	0.12835	0.30825	0.219269	MLXIP/PRKCB/PPP1CA/OGA/PTEN/PIK3R1/FOXO1/PRKCE/PIK3CA/RPS6KA1/CREB1/IKBKB/PIK3CD/IRS2/AKT2	15	B2
hsa04066	HIF-1 signaling pathway	15/814	109/8035	0.135739	0.31828	0.226404	PRKCB/CAMK2D/MKNK2/PIK3R1/PIK3CA/ELOB/CREBBP/MAPK1/EP300/HIF1A/PIK3CD/PFKL/AKT2/PGK1/PLCG2	15	B2
hsa04926	Relaxin signaling pathway	15/814	129/8035	0.325643	0.61557	0.437876	GNB1/GNB4/PIK3R1/TGFBR2/PIK3CA/GNG5/CREB1/SMAD2/MAPK1/GNAI2/PIK3CD/ATF6B/AKT2/RAF1/GNB2	15	B2
hsa04261	Adrenergic signaling in cardiomyocytes	15/814	149/8035	0.551021	0.858771	0.610874	CAMK2D/PPP1CA/CALM2/MYL4/ATP2A3/CREB1/MAPK1/PPP2R5C/GNAI2/ATF6B/PPP2CA/AKT2/PPP2R5E/ATP1B3/PPP2R3B	15	B2
hsa04211	Longevity regulating pathway	14/814	89/8035	0.062939	0.177318	0.126133	RB1CC1/PIK3R1/FOXO1/PIK3CA/CREB1/BAX/TP53/PIK3CD/CAT/IRS2/ATF6B/EHMT1/AKT2/ADIPOR2	14	B2
hsa04658	Th1 and Th2 cell differentiation	14/814	92/8035	0.0786681	0.209543	0.149055	HLA-DMB/HLA-DPB1/HLA-DRA/HLA-DRB5/HLA-DQB1/HLA-DMA/JAK1/HLA-DPA1/STAT1/IKBKB/HLA-DOA/MAPK1/NFATC3/PPP3CA	14	B2
hsa04922	Glucagon signaling pathway	14/814	106/8035	0.182799	0.388116	0.276081	CAMK2D/CALM2/FOXO1/CREB1/PHKB/CREBBP/ITPR2/PPP4R3A/EP300/PPP4C/PFKL/PPP4R3B/AKT2/PPP3CA	14	B2
hsa04725	Cholinergic synapse	14/814	113/8035	0.251998	0.496023	0.352838	PRKCB/CAMK2D/GNB1/GNB4/PIK3R1/PIK3CA/GNG5/CREB1/ITPR2/MAPK1/GNAI2/PIK3CD/AKT2/GNB2	14	B2
hsa04650	Natural killer cell mediated cytotoxicity	14/814	131/8035	0.458431	0.758871	0.539811	SYK/PRKCB/HLA-A/HLA-B/HLA-E/PIK3R1/PIK3CA/MAPK1/PIK3CD/IFNAR1/RAC1/PPP3CA/RAF1/PLCG2	14	B2
hsa04270	Vascular smooth muscle contraction	14/814	135/8035	0.505361	0.816085	0.580509	PRKCB/PPP1R14A/ROCK1/PPP1CA/CALM2/MYL6/PPP1R12A/PRKCE/RHOA/ITPR2/MAPK1/NPPC/GNA13/RAF1	14	B2
hsa04934	Cushing syndrome	14/814	155/8035	0.715352	0.988671	0.703276	CAMK2D/CDK6/RB1/CREB1/USP8/LEF1/ITPR2/MAPK1/GNAI2/RAP1B/ATF6B/CTNNB1/APC/KMT2A	14	B2
hsa04137	Mitophagy - animal	13/814	68/8035	0.0175457	0.0659695	0.0469264	UBB/CSNK2A1/GABARAPL2/USP15/RPS27A/TAX1BP1/CSNK2B/USP8/TP53/HIF1A/BCL2L1/BNIP3L/BECN1	13	B2
hsa04664	Fc epsilon RI signaling pathway	13/814	68/8035	0.0175457	0.0659695	0.0469264	SYK/LYN/BTK/INPP5D/PIK3R1/PIK3CA/MAPK1/MAP2K3/PIK3CD/AKT2/RAC1/RAF1/PLCG2	13	B2
hsa04012	ErbB signaling pathway	13/814	85/8035	0.0852241	0.224961	0.160022	PRKCB/CAMK2D/PAK2/PIK3R1/CBLB/PIK3CA/MAPK1/PIK3CD/NCK2/AKT2/CRK/RAF1/PLCG2	13	B2
hsa05222	Small cell lung cancer	13/814	92/8035	0.135785	0.31828	0.226404	PTEN/CDK6/PIK3R1/RB1/PIK3CA/BAX/IKBKB/TP53/PIK3CD/BCL2L1/AKT2/MAX/BIRC2	13	B2
hsa04914	Progesterone-mediated oocyte maturation	13/814	99/8035	0.199661	0.417571	0.297032	CDC25B/HSP90AA1/PIK3R1/PIK3CA/RPS6KA1/HSP90AB1/MAPK1/GNAI2/PIK3CD/MAD1L1/AKT2/FZR1/RAF1	13	B2
hsa04620	Toll-like receptor signaling pathway	13/814	104/8035	0.252244	0.496023	0.352838	PIK3R1/PIK3CA/STAT1/IKBKB/MAPK1/MAP2K3/PIK3CD/IFNAR1/IRAK4/MYD88/AKT2/RAC1/IRF7	13	B2
hsa04724	Glutamatergic synapse	13/814	114/8035	0.369209	0.647774	0.460784	PRKCB/GLUL/GNB1/GNB4/GRK2/GNG5/ITPR2/MAPK1/GRK3/GNAI2/SLC38A2/PPP3CA/GNB2	13	B2
hsa05330	Allograft rejection	12/814	38/8035	0.000241695	0.00202333	0.00143926	HLA-A/HLA-B/HLA-DMB/HLA-DPB1/HLA-DRA/HLA-DRB5/HLA-E/HLA-DQB1/HLA-DMA/HLA-DPA1/HLA-DOA/HLA-F	12	B2
hsa05332	Graft-versus-host disease	12/814	42/8035	0.000674781	0.0047074	0.00334854	HLA-A/HLA-B/HLA-DMB/HLA-DPB1/HLA-DRA/HLA-DRB5/HLA-E/HLA-DQB1/HLA-DMA/HLA-DPA1/HLA-DOA/HLA-F	12	B2
hsa04940	Type I diabetes mellitus	12/814	43/8035	0.000851233	0.00580026	0.00412592	HLA-A/HLA-B/HLA-DMB/HLA-DPB1/HLA-DRA/HLA-DRB5/HLA-E/HLA-DQB1/HLA-DMA/HLA-DPA1/HLA-DOA/HLA-F	12	B2
hsa04330	Notch signaling pathway	12/814	53/8035	0.00575714	0.0263569	0.0187486	DTX1/LFNG/CREBBP/NUMB/PSEN1/MFNG/EP300/DTX3L/CIR1/HDAC1/ADAM17/HDAC2	12	B2
hsa05320	Autoimmune thyroid disease	12/814	53/8035	0.00575714	0.0263569	0.0187486	HLA-A/HLA-B/HLA-DMB/HLA-DPB1/HLA-DRA/HLA-DRB5/HLA-E/HLA-DQB1/HLA-DMA/HLA-DPA1/HLA-DOA/HLA-F	12	B2
hsa05213	Endometrial cancer	12/814	58/8035	0.0120418	0.0504034	0.0358537	PTEN/PIK3R1/PIK3CA/LEF1/BAX/MAPK1/TP53/PIK3CD/CTNNB1/AKT2/APC/RAF1	12	B2
hsa04720	Long-term potentiation	12/814	67/8035	0.035047	0.11538	0.0820734	PRKCB/CAMK2D/PPP1CA/CALM2/RPS6KA1/CREBBP/ITPR2/MAPK1/EP300/RAP1B/PPP3CA/RAF1	12	B2
hsa05223	Non-small cell lung cancer	12/814	68/8035	0.0387973	0.123846	0.0880956	PRKCB/CDK6/PIK3R1/RB1/PIK3CA/BAX/MAPK1/TP53/PIK3CD/AKT2/RAF1/PLCG2	12	B2
hsa01524	Platinum drug resistance	12/814	73/8035	0.061795	0.175786	0.125042	TOP2B/PIK3R1/PIK3CA/BAX/MSH3/ATM/MAPK1/TP53/PIK3CD/BCL2L1/AKT2/BIRC2	12	B2
hsa04115	p53 signaling pathway	12/814	73/8035	0.061795	0.175786	0.125042	MDM4/PTEN/CDK6/CCNG2/ZMAT3/BAX/ATM/TP53/SHISA5/SIAH1/BCL2L1/RRM2B	12	B2
hsa01521	EGFR tyrosine kinase inhibitor resistance	12/814	79/8035	0.0994401	0.246915	0.175639	PRKCB/PTEN/PIK3R1/JAK1/PIK3CA/BAX/MAPK1/PIK3CD/BCL2L1/AKT2/RAF1/PLCG2	12	B2
hsa04260	Cardiac muscle contraction	12/814	87/8035	0.167026	0.359981	0.256067	SLC9A7/COX7C/COX4I1/MYL4/ATP2A3/COX6C/COX7A2L/COX7A2/COX6B1/UQCRC2/UQCRFS1/ATP1B3	12	B2
hsa01522	Endocrine resistance	12/814	98/8035	0.28748	0.554155	0.39419	PIK3R1/RB1/NCOR1/PIK3CA/NCOA3/BAX/MAPK1/TP53/PIK3CD/MED1/AKT2/RAF1	12	B2
hsa05142	Chagas disease (American trypanosomiasis)	12/814	102/8035	0.336697	0.619602	0.440745	PIK3R1/TGFBR2/PIK3CA/IKBKB/SMAD2/MAPK1/GNAI2/PIK3CD/IRAK4/MYD88/PPP2CA/AKT2	12	B2
hsa01200	Carbon metabolism	12/814	117/8035	0.527451	0.830878	0.591032	ME2/ESD/ADPGK/PFKL/HADHA/CAT/PGLS/TKT/ACSS1/PGK1/HIBCH/ADH5	12	B2
hsa04723	Retrograde endocannabinoid signaling	12/814	148/8035	0.831279	1	0.711335	PRKCB/GNB1/GNB4/GNG5/ITPR2/MAPK1/NDUFA4/GNAI2/NDUFA5/NDUFB8/NDUFA10/GNB2	12	B2
hsa05340	Primary immunodeficiency	11/814	38/8035	0.000995683	0.00663034	0.00471639	RAG1/RAG2/PTPRC/BTK/IGLL1/CIITA/CD19/CD79A/IL7R/DCLRE1C/TAP1	11	B2
hsa04370	VEGF signaling pathway	11/814	59/8035	0.0327159	0.108929	0.0774849	PRKCB/PIK3R1/CDC42/PIK3CA/MAPK1/PIK3CD/AKT2/RAC1/PPP3CA/RAF1/PLCG2	11	B2
hsa05321	Inflammatory bowel disease (IBD)	11/814	65/8035	0.0603857	0.175786	0.125042	HLA-DMB/HLA-DPB1/HLA-DRA/HLA-DRB5/HLA-DQB1/HLA-DMA/HLA-DPA1/STAT1/SMAD2/HLA-DOA/SMAD3	11	B2
hsa05221	Acute myeloid leukemia	11/814	67/8035	0.0722602	0.197733	0.140654	PIK3R1/PIK3CA/SPI1/LEF1/IKBKB/MAPK1/PIK3CD/RARA/PML/AKT2/RAF1	11	B2
hsa05120	Epithelial cell signaling in Helicobacter pylori infection	11/814	70/8035	0.0926854	0.238218	0.169452	LYN/ATP6V1G1/ATP6V0B/ADAM10/CDC42/IKBKB/CSK/ATP6V1F/RAC1/ADAM17/PLCG2	11	B2
hsa05218	Melanoma	11/814	72/8035	0.108056	0.266054	0.189254	PTEN/CDK6/PIK3R1/RB1/PIK3CA/BAX/MAPK1/TP53/PIK3CD/AKT2/RAF1	11	B2
hsa05323	Rheumatoid arthritis	11/814	93/8035	0.340464	0.619602	0.440745	ATP6V1G1/HLA-DMB/HLA-DPB1/HLA-DRA/HLA-DRB5/HLA-DQB1/HLA-DMA/ATP6V0B/HLA-DPA1/HLA-DOA/ATP6V1F	11	B2
hsa04750	Inflammatory mediator regulation of TRP channels	11/814	100/8035	0.434107	0.726818	0.517011	PRKCB/CAMK2D/PPP1CA/CALM2/PIK3R1/PRKCE/PIK3CA/ITPR2/MAP2K3/PIK3CD/PLCG2	11	B2
hsa04916	Melanogenesis	11/814	101/8035	0.447538	0.745048	0.529979	PRKCB/CAMK2D/CALM2/CREB1/LEF1/CREBBP/MAPK1/EP300/GNAI2/CTNNB1/RAF1	11	B2
hsa04668	TNF signaling pathway	11/814	112/8035	0.59017	0.889786	0.632936	PIK3R1/PIK3CA/CREB1/IKBKB/MAPK1/MAP2K3/PIK3CD/ATF6B/AKT2/DNM1L/BIRC2	11	B2
hsa03050	Proteasome	10/814	46/8035	0.0149961	0.0610259	0.0434099	PSME1/PSMB8/PSMB9/PSMA7/PSMB7/POMP/PSMA4/PSMA2/PSMD8/PSMA5	10	B2
hsa04672	Intestinal immune network for IgA production	10/814	49/8035	0.0229505	0.0810182	0.057631	HLA-DMB/HLA-DPB1/HLA-DRA/HLA-DRB5/CXCR4/HLA-DQB1/HLA-DMA/HLA-DPA1/HLA-DOA/ICOSLG	10	B2
hsa04213	Longevity regulating pathway - multiple species	10/814	62/8035	0.0923269	0.238218	0.169452	PIK3R1/FOXO1/PIK3CA/HSPA8/PIK3CD/CAT/IRS2/AKT2/HDAC1/HDAC2	10	B2
hsa05230	Central carbon metabolism in cancer	10/814	70/8035	0.16709	0.359981	0.256067	PTEN/PIK3R1/PIK3CA/MAPK1/TP53/HIF1A/PIK3CD/PFKL/AKT2/RAF1	10	B2
hsa00562	Inositol phosphate metabolism	10/814	73/8035	0.200947	0.417571	0.297032	MTMR1/PTEN/INPP5D/PIK3C2B/PIK3CA/PIK3CD/PIP5K1A/MTMR6/PLCG2/MTMR4	10	B2
hsa04912	GnRH signaling pathway	10/814	93/8035	0.471106	0.775472	0.55162	PRKCB/CAMK2D/CALM2/CDC42/MAP3K2/ITPR2/MAPK1/MAP2K3/MAP3K1/RAF1	10	B2
hsa04713	Circadian entrainment	10/814	97/8035	0.526449	0.830878	0.591032	PRKCB/CAMK2D/CALM2/GNB1/GNB4/GNG5/CREB1/MAPK1/GNAI2/GNB2	10	B2
hsa04972	Pancreatic secretion	10/814	102/8035	0.59267	0.889786	0.632936	CD38/PRKCB/RAB11A/ATP2A3/RHOA/ITPR2/CA2/RAP1B/RAC1/ATP1B3	10	B2
hsa04340	Hedgehog signaling pathway	9/814	50/8035	0.061282	0.175786	0.125042	CSNK1E/GRK2/CSNK1A1/SMURF2/CUL3/GRK3/CSNK1G2/SPOPL/FBXW11	9	B2
hsa05031	Amphetamine addiction	9/814	69/8035	0.261644	0.507693	0.36114	PRKCB/CAMK2D/PPP1CA/CALM2/CREB1/ATF6B/HDAC1/PPP3CA/HDAC2	9	B2
hsa04971	Gastric acid secretion	9/814	76/8035	0.362855	0.64046	0.455582	PRKCB/ACTB/ACTG1/CAMK2D/CALM2/ITPR2/GNAI2/CA2/ATP1B3	9	B2
hsa04727	GABAergic synapse	9/814	89/8035	0.554393	0.859455	0.61136	PRKCB/GLUL/GNB1/GABARAPL2/GNB4/GNG5/GNAI2/SLC38A2/GNB2	9	B2
hsa05032	Morphine addiction	9/814	91/8035	0.582107	0.883717	0.628618	PRKCB/GNB1/GNB4/GRK2/GNG5/PDE4D/GRK3/GNAI2/GNB2	9	B2
hsa04925	Aldosterone synthesis and secretion	9/814	98/8035	0.672209	0.960766	0.683426	PRKCB/CAMK2D/CALM2/PRKCE/CREB1/CAMK1D/ITPR2/ATF6B/ATP1B3	9	B2
hsa03008	Ribosome biogenesis in eukaryotes	9/814	112/8035	0.813469	1	0.711335	REXO2/CSNK2A1/RRP7A/CSNK2B/RAN/TCOF1/NOP56/NOP10/XRN2	9	B2
hsa04726	Serotonergic synapse	9/814	115/8035	0.836735	1	0.711335	PRKCB/GNB1/GNB4/GNG5/ITPR2/MAPK1/GNAI2/RAF1/GNB2	9	B2
hsa05310	Asthma	8/814	31/8035	0.0101946	0.0432902	0.0307938	HLA-DMB/HLA-DPB1/HLA-DRA/HLA-DRB5/HLA-DQB1/HLA-DMA/HLA-DPA1/HLA-DOA	8	B2
hsa04930	Type II diabetes mellitus	8/814	46/8035	0.0884463	0.231382	0.16459	PIK3R1/PRKCE/PIK3CA/IKBKB/MAPK1/PIK3CD/SOCS1/IRS2	8	B2
hsa04961	Endocrine and other factor-regulated calcium reabsorption	8/814	53/8035	0.163317	0.359981	0.256067	PRKCB/RAB11A/VDR/CLTA/DNM2/AP2M1/ATP1B3/AP2B1	8	B2
hsa04730	Long-term depression	8/814	60/8035	0.259144	0.506195	0.360074	LYN/PRKCB/ITPR2/MAPK1/GNAI2/GNA13/PPP2CA/RAF1	8	B2
hsa04929	GnRH secretion	8/814	64/8035	0.320185	0.609184	0.433334	PRKCB/PIK3R1/PIK3CA/ITPR2/MAPK1/PIK3CD/AKT2/RAF1	8	B2
hsa04622	RIG-I-like receptor signaling pathway	8/814	70/8035	0.415513	0.707822	0.503498	ISG15/DDX3X/IKBKB/MAP3K1/ATG12/TRIM25/MAVS/IRF7	8	B2
hsa04917	Prolactin signaling pathway	8/814	70/8035	0.415513	0.707822	0.503498	PIK3R1/PIK3CA/STAT1/MAPK1/PIK3CD/SOCS1/AKT2/RAF1	8	B2
hsa04721	Synaptic vesicle cycle	8/814	78/8035	0.540693	0.847183	0.60263	ATP6V1G1/ATP6V0B/CLTA/ATP6V1F/VAMP2/DNM2/AP2M1/AP2B1	8	B2
hsa04540	Gap junction	8/814	88/8035	0.679579	0.966149	0.687256	PRKCB/MAP3K2/ITPR2/MAPK1/TUBA1A/GNAI2/TUBB6/RAF1	8	B2
hsa05150	Staphylococcus aureus infection	8/814	96/8035	0.769784	1	0.711335	HLA-DMB/HLA-DPB1/HLA-DRA/HLA-DRB5/HLA-DQB1/HLA-DMA/HLA-DPA1/HLA-DOA	8	B2
hsa04142	Lysosome	8/814	128/8035	0.954912	1	0.711335	LAPTM5/IGF2R/ATP6V0B/AP1B1/ENTPD4/CLTA/MANBA/AP1S2	8	B2
hsa04130	SNARE interactions in vesicular transport	7/814	33/8035	0.0439347	0.135504	0.0963887	STX7/VAMP8/VAMP2/STX16/VTI1A/USE1/SNAP23	7	B2
hsa05216	Thyroid cancer	7/814	37/8035	0.0746831	0.200754	0.142803	LEF1/BAX/TPR/MAPK1/TP53/CCDC6/CTNNB1	7	B2
hsa04962	Vasopressin-regulated water reabsorption	7/814	44/8035	0.152248	0.345804	0.245983	ARHGDIB/DYNC1H1/RAB11A/CREB1/VAMP2/DYNLL1/DCTN5	7	B2
hsa02010	ABC transporters	7/814	45/8035	0.165598	0.359981	0.256067	ABCA1/ABCG1/ABCB4/ABCD4/ABCA7/ABCB7/TAP1	7	B2
hsa05110	Vibrio cholerae infection	7/814	50/8035	0.2392	0.483348	0.343823	ATP6V1G1/ACTB/ACTG1/ATP6V0B/ARF1/ATP6V1F/PLCG2	7	B2
hsa00240	Pyrimidine metabolism	7/814	57/8035	0.355193	0.638476	0.45417	NT5C2/ENTPD4/DPYD/CTPS1/AK9/RRM2B/NT5C	7	B2
hsa05014	Amyotrophic lateral sclerosis (ALS)	7/814	57/8035	0.355193	0.638476	0.45417	BAX/TP53/MAP2K3/CAT/BCL2L1/RAC1/PPP3CA	7	B2
hsa05133	Pertussis	7/814	76/8035	0.661558	0.95018	0.675896	CFL1/CALM2/RHOA/MAPK1/GNAI2/IRAK4/MYD88	7	B2
hsa00564	Glycerophospholipid metabolism	7/814	98/8035	0.880075	1	0.711335	DGKD/PLD4/DGKZ/LPGAT1/LYPLA1/LPIN2/CHPT1	7	B2
hsa00230	Purine metabolism	7/814	130/8035	0.982124	1	0.711335	NT5C2/PDE4D/ENTPD4/AK9/RRM2B/NT5C/DGUOK	7	B2
hsa04060	Cytokine-cytokine receptor interaction	7/814	294/8035	1	1	0.711335	BMP3/CXCR4/TGFBR2/TNFRSF21/IL7R/IFNAR1/TNFRSF14	7	B2
hsa04136	Autophagy - other	6/814	32/8035	0.0986339	0.246915	0.175639	GABARAPL2/ATG12/ATG4D/IGBP1/PPP2CA/BECN1	6	B2
hsa03410	Base excision repair	6/814	33/8035	0.110789	0.270511	0.192424	NEIL1/HMGB1/PARP1/TDG/APEX1/MBD4	6	B2
hsa00760	Nicotinate and nicotinamide metabolism	6/814	35/8035	0.137244	0.319146	0.22702	CD38/NT5C2/NNT/SIRT7/NADK/NT5C	6	B2
hsa04960	Aldosterone-regulated sodium reabsorption	6/814	37/8035	0.166346	0.359981	0.256067	PRKCB/PIK3R1/PIK3CA/MAPK1/PIK3CD/ATP1B3	6	B2
hsa00514	Other types of O-glycan biosynthesis	6/814	47/8035	0.339616	0.619602	0.440745	COLGALT1/LFNG/GALNT7/MFNG/B4GALT1/GALNT1	6	B2
hsa04973	Carbohydrate digestion and absorption	6/814	47/8035	0.339616	0.619602	0.440745	PRKCB/PIK3R1/PIK3CA/PIK3CD/AKT2/ATP1B3	6	B2
hsa04923	Regulation of lipolysis in adipocytes	6/814	56/8035	0.506919	0.816085	0.580509	PIK3R1/PIK3CA/GNAI2/PIK3CD/IRS2/AKT2	6	B2
hsa04918	Thyroid hormone synthesis	6/814	75/8035	0.784982	1	0.711335	PRKCB/CREB1/ITPR2/TTF1/ATF6B/ATP1B3	6	B2
hsa04911	Insulin secretion	6/814	86/8035	0.880349	1	0.711335	PRKCB/CAMK2D/CREB1/VAMP2/ATF6B/ATP1B3	6	B2
hsa04970	Salivary secretion	6/814	93/8035	0.92023	1	0.711335	CD38/PRKCB/CALM2/ITPR2/VAMP2/ATP1B3	6	B2
hsa04657	IL-17 signaling pathway	6/814	94/8035	0.924858	1	0.711335	HSP90AA1/IKBKB/HSP90AB1/MAPK1/SRSF1/ELAVL1	6	B2
hsa04740	Olfactory transduction	6/814	448/8035	1	1	0.711335	RGS2/CAMK2D/CALM2/GNB1/GRK2/GRK3	6	B2
hsa04215	Apoptosis - multiple species	5/814	32/8035	0.21888	0.448475	0.319016	BIRC6/BAX/BCL2L1/BIRC2/BECN1	5	B2
hsa04216	Ferroptosis	5/814	41/8035	0.402628	0.693941	0.493624	PCBP2/MAP1LC3B/TP53/VDAC2/PCBP1	5	B2
hsa03022	Basal transcription factors	5/814	45/8035	0.484882	0.78928	0.561442	GTF2I/TAF7/GTF2A2/TAF11/TAF15	5	B2
hsa04979	Cholesterol metabolism	5/814	50/8035	0.581353	0.883717	0.628618	ABCA1/VDAC1/MYLIP/VAPA/VDAC2	5	B2
hsa05134	Legionellosis	5/814	57/8035	0.698184	0.969516	0.68965	EEF1A1/HSPA8/ARF1/MYD88/HBS1L	5	B2
hsa04623	Cytosolic DNA-sensing pathway	5/814	63/8035	0.778739	1	0.711335	ADAR/IKBKB/POLR1D/MAVS/IRF7	5	B2
hsa05217	Basal cell carcinoma	5/814	63/8035	0.778739	1	0.711335	LEF1/BAX/TP53/CTNNB1/APC	5	B2
hsa00010	Glycolysis / Gluconeogenesis	5/814	67/8035	0.822537	1	0.711335	ADPGK/PFKL/ACSS1/PGK1/ADH5	5	B2
hsa04924	Renin secretion	5/814	69/8035	0.841662	1	0.711335	CALM2/CREB1/ITPR2/GNAI2/PPP3CA	5	B2
hsa05412	Arrhythmogenic right ventricular cardiomyopathy (ARVC)	5/814	77/8035	0.901904	1	0.711335	ACTB/ACTG1/ATP2A3/LEF1/CTNNB1	5	B2
hsa05146	Amoebiasis	5/814	102/8035	0.981797	1	0.711335	PRKCB/PRDX1/PIK3R1/PIK3CA/PIK3CD	5	B2
hsa03450	Non-homologous end-joining	4/814	13/8035	0.0355013	0.115576	0.0822135	LIG4/XRCC5/POLM/DCLRE1C	4	B2
hsa00630	Glyoxylate and dicarboxylate metabolism	4/814	30/8035	0.361794	0.64046	0.455582	GLUL/GRHPR/CAT/ACSS1	4	B2
hsa03020	RNA polymerase	4/814	31/8035	0.38575	0.668786	0.475731	POLR2G/POLR1D/POLR2B/ZNRD1	4	B2
hsa04710	Circadian rhythm	4/814	31/8035	0.38575	0.668786	0.475731	CSNK1E/SKP1/CREB1/FBXW11	4	B2
hsa00620	Pyruvate metabolism	4/814	39/8035	0.567411	0.875007	0.622423	ME2/GRHPR/ACSS1/GLO1	4	B2
hsa05219	Bladder cancer	4/814	41/8035	0.608087	0.899846	0.640092	RB1/MAPK1/TP53/RAF1	4	B2
hsa00380	Tryptophan metabolism	4/814	42/8035	0.627523	0.910219	0.647471	KMO/HADHA/CAT/DHTKD1	4	B2
hsa00520	Amino sugar and nucleotide sugar metabolism	4/814	48/8035	0.730689	1	0.711335	UGP2/CYB5R4/UXS1/CYB5R3	4	B2
hsa00565	Ether lipid metabolism	4/814	49/8035	0.745611	1	0.711335	PLD4/PAFAH2/PAFAH1B2/CHPT1	4	B2
hsa04920	Adipocytokine signaling pathway	4/814	69/8035	0.929271	1	0.711335	IKBKB/IRS2/AKT2/ADIPOR2	4	B2
hsa01230	Biosynthesis of amino acids	4/814	74/8035	0.950338	1	0.711335	GLUL/PFKL/TKT/PGK1	4	B2
hsa04146	Peroxisome	4/814	83/8035	0.974398	1	0.711335	PRDX1/PEX26/ABCD4/CAT	4	B2
hsa05410	Hypertrophic cardiomyopathy (HCM)	4/814	90/8035	0.985011	1	0.711335	TTN/ACTB/ACTG1/ATP2A3	4	B2
hsa05414	Dilated cardiomyopathy (DCM)	4/814	96/8035	0.990642	1	0.711335	TTN/ACTB/ACTG1/ATP2A3	4	B2
hsa04080	Neuroactive ligand-receptor interaction	4/814	341/8035	1	1	0.711335	S1PR4/S1PR1/NR3C1/P2RX5	4	B2
hsa04966	Collecting duct acid secretion	3/814	27/8035	0.5248	0.830878	0.591032	ATP6V1G1/CA2/ATP6V1F	3	B2
hsa04392	Hippo signaling pathway - multiple species	3/814	29/8035	0.574606	0.881464	0.627016	CSNK1E/MOB1A/RASSF2	3	B2
hsa00030	Pentose phosphate pathway	3/814	30/8035	0.598252	0.889786	0.632936	PFKL/PGLS/TKT	3	B2
hsa00410	beta-Alanine metabolism	3/814	30/8035	0.598252	0.889786	0.632936	DPYD/HADHA/HIBCH	3	B2
hsa00052	Galactose metabolism	3/814	31/8035	0.62102	0.905268	0.643949	UGP2/B4GALT1/PFKL	3	B2
hsa00640	Propanoate metabolism	3/814	34/8035	0.683915	0.966149	0.687256	HADHA/ACSS1/HIBCH	3	B2
hsa05143	African trypanosomiasis	3/814	37/8035	0.738684	1	0.711335	PRKCB/MYD88/HBB	3	B2
hsa00280	Valine, leucine and isoleucine degradation	3/814	48/8035	0.877649	1	0.711335	HADHA/HIBCH/HSD17B10	3	B2
hsa00270	Cysteine and methionine metabolism	3/814	49/8035	0.88626	1	0.711335	DNMT3B/AHCYL1/DNMT3A	3	B2
hsa05030	Cocaine addiction	3/814	49/8035	0.88626	1	0.711335	CREB1/GNAI2/ATF6B	3	B2
hsa05144	Malaria	3/814	50/8035	0.894326	1	0.711335	CD81/MYD88/HBB	3	B2
hsa00561	Glycerolipid metabolism	3/814	61/8035	0.954496	1	0.711335	DGKD/DGKZ/LPIN2	3	B2
hsa04927	Cortisol synthesis and secretion	3/814	65/8035	0.96694	1	0.711335	CREB1/ITPR2/ATF6B	3	B2
hsa00970	Aminoacyl-tRNA biosynthesis	3/814	66/8035	0.969506	1	0.711335	QRSL1/LARS/KARS	3	B2
hsa04976	Bile secretion	3/814	90/8035	0.995998	1	0.711335	ABCB4/CA2/ATP1B3	3	B2
hsa04974	Protein digestion and absorption	3/814	95/8035	0.997425	1	0.711335	MME/SLC38A2/ATP1B3	3	B2
hsa00910	Nitrogen metabolism	2/814	17/8035	0.525716	0.830878	0.591032	GLUL/CA2	2	B2
hsa00770	Pantothenate and CoA biosynthesis	2/814	21/8035	0.642988	0.928056	0.660159	DPYD/PANK3	2	B2
hsa03060	Protein export	2/814	23/8035	0.692462	0.966149	0.687256	SRP14/SRP9	2	B2
hsa04614	Renin-angiotensin system	2/814	23/8035	0.692462	0.966149	0.687256	MME/LNPEP	2	B2
hsa04964	Proximal tubule bicarbonate reclamation	2/814	23/8035	0.692462	0.966149	0.687256	CA2/ATP1B3	2	B2
hsa00650	Butanoate metabolism	2/814	28/8035	0.791666	1	0.711335	ACSM3/HADHA	2	B2
hsa04744	Phototransduction	2/814	28/8035	0.791666	1	0.711335	CALM2/GNB1	2	B2
hsa01523	Antifolate resistance	2/814	31/8035	0.836618	1	0.711335	IKBKB/FPGS	2	B2
hsa00512	Mucin type O-glycan biosynthesis	2/814	32/8035	0.849533	1	0.711335	GALNT7/GALNT1	2	B2
hsa05020	Prion diseases	2/814	35/8035	0.882887	1	0.711335	BAX/MAPK1	2	B2
hsa00250	Alanine, aspartate and glutamate metabolism	2/814	36/8035	0.892391	1	0.711335	GLUL/RIMKLB	2	B2
hsa00513	Various types of N-glycan biosynthesis	2/814	39/8035	0.916769	1	0.711335	B4GALT1/STT3B	2	B2
hsa03440	Homologous recombination	2/814	41/8035	0.930029	1	0.711335	ATM/ABRAXAS1	2	B2
hsa00071	Fatty acid degradation	2/814	44/8035	0.946232	1	0.711335	HADHA/ADH5	2	B2
hsa00510	N-Glycan biosynthesis	2/814	50/8035	0.968557	1	0.711335	B4GALT1/STT3B	2	B2
hsa04978	Mineral absorption	2/814	59/8035	0.986217	1	0.711335	VDR/ATP1B3	2	B2
hsa03320	PPAR signaling pathway	2/814	77/8035	0.997487	1	0.711335	DBI/FABP5	2	B2
hsa00983	Drug metabolism - other enzymes	2/814	79/8035	0.997927	1	0.711335	DPYD/RRM2B	2	B2
hsa04061	Viral protein interaction with cytokine and cytokine receptor	2/814	100/8035	0.999734	1	0.711335	CXCR4/TNFRSF14	2	B2
hsa00533	Glycosaminoglycan biosynthesis - keratan sulfate	1/814	14/8035	0.776125	1	0.711335	B4GALT1	1	B2
hsa00604	Glycosphingolipid biosynthesis - ganglio series	1/814	15/8035	0.798845	1	0.711335	ST3GAL5	1	B2
hsa00511	Other glycan degradation	1/814	18/8035	0.854094	1	0.711335	MANBA	1	B2
hsa00100	Steroid biosynthesis	1/814	20/8035	0.882221	1	0.711335	LBR	1	B2
hsa00532	Glycosaminoglycan biosynthesis - chondroitin sulfate / dermatan sulfate	1/814	20/8035	0.882221	1	0.711335	CHST12	1	B2
hsa00670	One carbon pool by folate	1/814	20/8035	0.882221	1	0.711335	MTHFD2L	1	B2
hsa00220	Arginine biosynthesis	1/814	21/8035	0.894182	1	0.711335	GLUL	1	B2
hsa00515	Mannose type O-glycan biosynthesis	1/814	23/8035	0.914588	1	0.711335	B4GALT1	1	B2
hsa03430	Mismatch repair	1/814	23/8035	0.914588	1	0.711335	MSH3	1	B2
hsa00534	Glycosaminoglycan biosynthesis - heparan sulfate / heparin	1/814	24/8035	0.923266	1	0.711335	HS3ST1	1	B2
hsa00790	Folate biosynthesis	1/814	26/8035	0.938068	1	0.711335	FPGS	1	B2
hsa00062	Fatty acid elongation	1/814	27/8035	0.944363	1	0.711335	HADHA	1	B2
hsa00601	Glycosphingolipid biosynthesis - lacto and neolacto series	1/814	27/8035	0.944363	1	0.711335	B4GALT1	1	B2
hsa00051	Fructose and mannose metabolism	1/814	33/8035	0.970762	1	0.711335	PFKL	1	B2
hsa00040	Pentose and glucuronate interconversions	1/814	34/8035	0.973736	1	0.711335	UGP2	1	B2
hsa00350	Tyrosine metabolism	1/814	35/8035	0.976408	1	0.711335	ADH5	1	B2
hsa00500	Starch and sucrose metabolism	1/814	36/8035	0.978808	1	0.711335	UGP2	1	B2
hsa03030	DNA replication	1/814	36/8035	0.978808	1	0.711335	RNASEH2B	1	B2
hsa00260	Glycine, serine and threonine metabolism	1/814	40/8035	0.986206	1	0.711335	GRHPR	1	B2
hsa04975	Fat digestion and absorption	1/814	43/8035	0.990005	1	0.711335	ABCA1	1	B2
hsa03420	Nucleotide excision repair	1/814	47/8035	0.993497	1	0.711335	DDB1	1	B2
hsa00330	Arginine and proline metabolism	1/814	50/8035	0.995289	1	0.711335	P4HA2	1	B2
hsa03460	Fanconi anemia pathway	1/814	54/8035	0.996936	1	0.711335	WDR48	1	B2
hsa00480	Glutathione metabolism	1/814	57/8035	0.997781	1	0.711335	RRM2B	1	B2
hsa01212	Fatty acid metabolism	1/814	57/8035	0.997781	1	0.711335	HADHA	1	B2
hsa00830	Retinol metabolism	1/814	68/8035	0.999321	1	0.711335	ADH5	1	B2
hsa00982	Drug metabolism - cytochrome P450	1/814	71/8035	0.999509	1	0.711335	ADH5	1	B2
hsa00980	Metabolism of xenobiotics by cytochrome P450	1/814	76/8035	0.999714	1	0.711335	ADH5	1	B2
hsa05204	Chemical carcinogenesis	1/814	82/8035	0.99985	1	0.711335	ADH5	1	B2
hsa04512	ECM-receptor interaction	1/814	88/8035	0.999922	1	0.711335	CD47	1	B2
hsa04141	Protein processing in endoplasmic reticulum	2020-04-15	167/8035	0.000205444	0.00410889	0.0030276	SSR4/SVIP/P4HB/DDOST	4	B3
hsa05143	African trypanosomiasis	2020-02-15	37/8035	0.00208631	0.0208631	0.0153728	HBB/HBA2	2	B3
hsa05144	Malaria	2020-02-15	50/8035	0.00378406	0.025227	0.0185883	HBB/HBA2	2	B3
hsa04657	IL-17 signaling pathway	2020-02-15	94/8035	0.0128777	0.0643885	0.0474442	S100A8/S100A9	2	B3
hsa04621	NOD-like receptor signaling pathway	2020-02-15	181/8035	0.0437169	0.145723	0.107375	NAMPT/CAMP	2	B3
hsa03060	Protein export	2020-01-15	23/8035	0.0421234	0.145723	0.107375	SEC11C	1	B3
hsa00760	Nicotinate and nicotinamide metabolism	2020-01-15	35/8035	0.0634376	0.149097	0.109861	NAMPT	1	B3
hsa00513	Various types of N-glycan biosynthesis	2020-01-15	39/8035	0.0704434	0.149097	0.109861	DDOST	1	B3
hsa00270	Cysteine and methionine metabolism	2020-01-15	49/8035	0.0877445	0.149097	0.109861	SRM	1	B3
hsa00330	Arginine and proline metabolism	2020-01-15	50/8035	0.0894579	0.149097	0.109861	SRM	1	B3
hsa00510	N-Glycan biosynthesis	2020-01-15	50/8035	0.0894579	0.149097	0.109861	DDOST	1	B3
hsa04979	Cholesterol metabolism	2020-01-15	50/8035	0.0894579	0.149097	0.109861	TSPO	1	B3
hsa00480	Glutathione metabolism	2020-01-15	57/8035	0.101368	0.155951	0.114912	SRM	1	B3
hsa00590	Arachidonic acid metabolism	2020-01-15	63/8035	0.111462	0.159231	0.117328	CYP4F3	1	B3
hsa04970	Salivary secretion	2020-01-15	93/8035	0.160359	0.206385	0.152074	CAMP	1	B3
hsa05150	Staphylococcus aureus infection	2020-01-15	96/8035	0.165108	0.206385	0.152074	CAMP	1	B3
hsa05152	Tuberculosis	2020-01-15	180/8035	0.288337	0.33922	0.249952	CAMP	1	B3
hsa05166	Human T-cell leukemia virus 1 infection	2020-01-15	219/8035	0.339579	0.37731	0.278018	TSPO	1	B3
hsa04080	Neuroactive ligand-receptor interaction	2020-01-15	341/8035	0.478514	0.503699	0.371147	TSPO	1	B3
hsa05010	Alzheimer disease	2020-01-15	369/8035	0.506292	0.506292	0.373057	RTN3	1	B3
hsa03010	Ribosome	81/383	158/8035	1.61e-66	3.92e-64	3.14e-64	RPS27/RPL13/RPL21/RPL30/RPL32/RPS29/RPL18A/RPL41/RPS2/RPL9/RPL39/RPL12/RPS27A/RPL34/RPS21/RPL36/RPLP2/RPS25/RPL37/RPS23/RPS15/RPL23A/RPL8/RPS18/RPL38/RPL28/RPS6/RPL13A/RPS12/RPS20/RPSA/RPL11/RPS8/RPS3A/RPL37A/RPS15A/RPS9/RPL10A/RPS10/RPS5/RPS3/RPL19/RPL29/RPS19/RPL35/RPL26/RPL3/UBA52/RPL27/RPL14/RPS14/RPL18/RPL35A/RPL27A/RPLP1/RPS13/FAU/RPS26/RPS16/RPL23/RPL7A/RPL22/RPS28/RPS7/RPL31/RPL10/RPL5/RP…	81	B4
hsa05168	Herpes simplex virus 1 infection	34/383	491/8035	0.0172563	0.082221	0.0658908	HLA-DRB1/CD74/HLA-DQA1/HLA-DRA/HLA-DPA1/HLA-DQB1/HLA-DPB1/BIRC3/ZNF331/POU2F2/SRSF7/HLA-DQA2/HLA-E/HLA-DMB/HLA-DMA/HLA-A/SRSF5/TRAF5/HLA-B/PPP1CB/HLA-DOB/HLA-DRB5/ZNF891/TAPBP/SP100/HLA-DOA/CYCS/ZNF141/SRSF2/BCL2/SOCS3/ZNF791/HLA-F/NFKBIA	34	B4
hsa05166	Human T-cell leukemia virus 1 infection	32/383	219/8035	1.09e-08	1.89e-07	1.51e-07	HLA-DRB1/TNFRSF13C/HLA-DQA1/HLA-DRA/HLA-DPA1/HLA-DQB1/HLA-DPB1/HLA-DQA2/HLA-E/HLA-DMB/HLA-DMA/HLA-A/CD40/IL2RG/HLA-B/NFKB2/HLA-DOB/NFATC1/TGFB1/FOS/ZFP36/HLA-DRB5/HLA-DOA/ATM/ETS1/RAN/SMAD3/PPP3CA/MYC/MAP3K1/HLA-F/NFKBIA	32	B4
hsa05169	Epstein-Barr virus infection	30/383	202/8035	2.19e-08	3.54e-07	2.84e-07	HLA-DRB1/HLA-DQA1/HLA-DRA/HLA-DPA1/HLA-DQB1/HLA-DPB1/FCER2/HLA-DQA2/HLA-E/HLA-DMB/HLA-DMA/HLA-A/TRAF5/CD40/CD44/HLA-B/NFKB2/LYN/HLA-DOB/RUNX3/HLA-DRB5/TAPBP/HLA-DOA/CYCS/STAT3/BCL2/CDKN1B/MYC/HLA-F/NFKBIA	30	B4
hsa04010	MAPK signaling pathway	27/383	294/8035	0.00077351	0.00648148	0.00519417	STK4/MEF2C/JUND/RASGRP2/DUSP1/NR4A1/FLNA/RRAS2/PRKCB/MAP4K4/NFKB2/CDC42/RAC2/AREG/NFATC1/GRB2/MAP3K8/TGFB1/FOS/DUSP2/RPS6KA5/PPP3CA/MKNK2/MYC/MAP3K1/BRAF/MAP3K2	27	B4
hsa04144	Endocytosis	25/383	248/8035	0.000303388	0.00320536	0.00256873	SMAP2/CXCR4/HLA-E/HLA-A/SNX2/ARPC2/VPS37B/ARPC3/IL2RG/HLA-B/CHMP1B/ACAP1/SNX3/BIN1/ARPC1B/CDC42/ARF6/RAB11FIP1/SMAD3/GRK6/CAPZA1/WIPF1/HLA-F/RABEP1/ACAP2	25	B4
hsa04659	Th17 cell differentiation	24/383	107/8035	1.21e-10	3.28e-09	2.63e-09	HLA-DRB1/HLA-DQA1/HLA-DRA/HLA-DPA1/HLA-DQB1/HLA-DPB1/IL4R/HSP90AB1/HLA-DQA2/HLA-DMB/HLA-DMA/IL2RG/HLA-DOB/NFATC1/TGFB1/FOS/HLA-DRB5/HLA-DOA/STAT6/IL27RA/STAT3/SMAD3/PPP3CA/NFKBIA	24	B4
hsa05152	Tuberculosis	24/383	180/8035	4.19e-06	5.1e-05	4.08e-05	HLA-DRB1/CD74/HLA-DQA1/HLA-DRA/HLA-DPA1/HLA-DQB1/HLA-DPB1/CORO1A/CALM1/HLA-DQA2/HLA-DMB/HLA-DMA/CTSS/LSP1/HLA-DOB/CIITA/TGFB1/HLA-DRB5/MALT1/HLA-DOA/CYCS/BCL2/PPP3CA/PLK3	24	B4
hsa04612	Antigen processing and presentation	22/383	78/8035	5.56e-12	3.38e-10	2.71e-10	HLA-DRB1/CD74/HLA-DQA1/HLA-DRA/HLA-DPA1/HLA-DQB1/HLA-DPB1/HSP90AB1/HLA-DQA2/HLA-E/HLA-DMB/HLA-DMA/HLA-A/CTSS/HLA-B/HLA-DOB/CIITA/IFI30/HLA-DRB5/TAPBP/HLA-DOA/HLA-F	22	B4
hsa04514	Cell adhesion molecules (CAMs)	22/383	148/8035	1.72e-06	2.32e-05	1.86e-05	HLA-DRB1/HLA-DQA1/HLA-DRA/HLA-DPA1/SELL/HLA-DQB1/HLA-DPB1/HLA-DQA2/PTPRC/HLA-E/HLA-DMB/CD22/HLA-DMA/HLA-A/CD40/CNTNAP2/HLA-B/HLA-DOB/HLA-DRB5/HLA-DOA/ICOSLG/HLA-F	22	B4
hsa04145	Phagosome	22/383	152/8035	2.71e-06	3.46e-05	2.78e-05	HLA-DRB1/HLA-DQA1/HLA-DRA/HLA-DPA1/HLA-DQB1/HLA-DPB1/CORO1A/HLA-DQA2/HLA-E/HLA-DMB/HLA-DMA/HLA-A/CTSS/HLA-B/TUBA1A/HLA-DOB/ATP6V0E1/HLA-DRB5/HLA-DOA/TUBA4A/NCF1/HLA-F	22	B4
hsa05170	Human immunodeficiency virus 1 infection	22/383	212/8035	0.000465108	0.00452085	0.00362295	CXCR4/CALM1/GNB5/HLA-E/HLA-A/ITPR1/TRAF5/PRKCB/HLA-B/RAC2/NFATC1/TNFRSF1B/FOS/TAPBP/CYCS/ATM/GNAI2/APOBEC3C/BCL2/PPP3CA/HLA-F/NFKBIA	22	B4
hsa05132	Salmonella infection	22/383	213/8035	0.000496377	0.00463922	0.00371781	RPS3/BIRC3/HSP90AB1/RHOH/PTPRC/ARPC2/FLNA/ARPC3/MYL12A/PFN1/RHOG/ARPC1B/CDC42/ARF6/FOS/CYCS/AHNAK/BCL2/SNX9/GCC2/MYC/NFKBIA	22	B4
hsa05163	Human cytomegalovirus infection	22/383	225/8035	0.00104097	0.00843184	0.00675716	CXCR4/CALM1/GNB5/HLA-E/HLA-A/ITPR1/TRAF5/PRKCB/HLA-B/RAC2/NFATC1/GRB2/AKAP13/TAPBP/CYCS/ARHGEF1/GNAI2/STAT3/PPP3CA/MYC/HLA-F/NFKBIA	22	B4
hsa05131	Shigellosis	22/383	242/8035	0.00264769	0.0156924	0.0125757	RPS27A/UBA52/ITPR1/TRAF5/ARPC2/ARPC3/CD44/MYL12A/PFN1/ARPC1B/CDC42/ARF6/CAST/MALT1/UBE2D3/RPS6KA5/UBE2D2/CYCS/ATM/BCL2/FNBP1/NFKBIA	22	B4
hsa05145	Toxoplasmosis	21/383	112/8035	5.3e-08	8.05e-07	6.45e-07	HLA-DRB1/HLA-DQA1/HLA-DRA/HLA-DPA1/HLA-DQB1/HLA-DPB1/BIRC3/HLA-DQA2/HLA-DMB/HLA-DMA/CD40/HLA-DOB/CIITA/TGFB1/HLA-DRB5/HLA-DOA/CYCS/GNAI2/STAT3/BCL2/NFKBIA	21	B4
hsa05416	Viral myocarditis	20/383	60/8035	1.63e-12	1.32e-10	1.06e-10	HLA-DRB1/HLA-DQA1/HLA-DRA/HLA-DPA1/HLA-DQB1/HLA-DPB1/CD55/HLA-DQA2/HLA-E/HLA-DMB/HLA-DMA/HLA-A/CD40/HLA-B/RAC2/HLA-DOB/HLA-DRB5/HLA-DOA/CYCS/HLA-F	20	B4
hsa04658	Th1 and Th2 cell differentiation	20/383	92/8035	7.91e-09	1.48e-07	1.18e-07	HLA-DRB1/HLA-DQA1/HLA-DRA/HLA-DPA1/HLA-DQB1/HLA-DPB1/IL4R/HLA-DQA2/HLA-DMB/HLA-DMA/IL2RG/HLA-DOB/NFATC1/RUNX3/FOS/HLA-DRB5/HLA-DOA/STAT6/PPP3CA/NFKBIA	20	B4
hsa05203	Viral carcinogenesis	20/383	204/8035	0.00168422	0.0110612	0.0088643	REL/HLA-E/HLA-A/TRAF5/HLA-B/NFKB2/CDC42/LYN/YWHAZ/GRB2/DDX3X/HNRNPK/SP100/YWHAB/EGR3/STAT3/PMAIP1/CDKN1B/HLA-F/NFKBIA	20	B4
hsa05205	Proteoglycans in cancer	20/383	205/8035	0.00178641	0.0114236	0.00915472	RPS6/EZR/DDX5/ITPR1/FLNA/RRAS2/PRKCB/CD44/PTPN6/PPP1CB/CDC42/GRB2/TGFB1/PDCD4/MSN/ARHGEF1/EIF4B/STAT3/MYC/BRAF	20	B4
hsa05321	Inflammatory bowel disease (IBD)	19/383	65/8035	8.09e-11	2.46e-09	1.97e-09	HLA-DRB1/HLA-DQA1/HLA-DRA/HLA-DPA1/HLA-DQB1/HLA-DPB1/IL4R/HLA-DQA2/HLA-DMB/HLA-DMA/IL2RG/HLA-DOB/NFATC1/TGFB1/HLA-DRB5/HLA-DOA/STAT6/STAT3/SMAD3	19	B4
hsa05140	Leishmaniasis	19/383	77/8035	1.96e-09	3.98e-08	3.19e-08	HLA-DRB1/HLA-DQA1/HLA-DRA/HLA-DPA1/HLA-DQB1/HLA-DPB1/EEF1A1/HLA-DQA2/HLA-DMB/HLA-DMA/PRKCB/PTPN6/HLA-DOB/TGFB1/FOS/HLA-DRB5/HLA-DOA/NCF1/NFKBIA	19	B4
hsa04640	Hematopoietic cell lineage	19/383	99/8035	1.57e-07	2.25e-06	1.8e-06	MS4A1/HLA-DRB1/HLA-DQA1/HLA-DRA/HLA-DPA1/HLA-DQB1/HLA-DPB1/CD37/FCER2/CD55/IL4R/HLA-DQA2/HLA-DMB/CD22/HLA-DMA/CD44/HLA-DOB/HLA-DRB5/HLA-DOA	19	B4
hsa05167	Kaposi sarcoma-associated herpesvirus infection	19/383	189/8035	0.00163057	0.0110064	0.00882034	RPS27A/UBA52/CALM1/GNB5/HLA-E/HLA-A/ITPR1/HLA-B/LYN/NFATC1/FOS/ZFP36/CYCS/STAT3/PPP3CA/MYC/HLA-F/CLEC2B/NFKBIA	19	B4
hsa05161	Hepatitis B	18/383	162/8035	0.000676039	0.00608435	0.00487591	PRKCB/YWHAZ/NFATC1/GRB2/DDX3X/TGFB1/FOS/YWHAB/CYCS/STAT6/EGR3/STAT3/BCL2/SMAD3/MYC/MAP3K1/BRAF/NFKBIA	18	B4
hsa05164	Influenza A	18/383	170/8035	0.00119087	0.00904314	0.00724704	HLA-DRB1/HLA-DQA1/HLA-DRA/HLA-DPA1/HLA-DQB1/HLA-DPB1/HLA-DQA2/HLA-DMB/HLA-DMA/PRKCB/HLA-DOB/CIITA/NXT1/HLA-DRB5/HLA-DOA/CYCS/SOCS3/NFKBIA	18	B4
hsa05130	Pathogenic Escherichia coli infection	18/383	192/8035	0.00455996	0.0263826	0.0211427	RPS3/EZR/ARPC2/ARPC3/PTPN6/ARPC1B/TUBA1A/CDC42/ARF6/FOS/NCL/CYCS/MYO1G/ARHGEF1/TUBA4A/WIPF1/MYH9/NFKBIA	18	B4
hsa05330	Allograft rejection	17/383	38/8035	2.74e-13	3.33e-11	2.67e-11	HLA-DRB1/HLA-DQA1/HLA-DRA/HLA-DPA1/HLA-DQB1/HLA-DPB1/HLA-DQA2/HLA-E/HLA-DMB/HLA-DMA/HLA-A/CD40/HLA-B/HLA-DOB/HLA-DRB5/HLA-DOA/HLA-F	17	B4
hsa04672	Intestinal immune network for IgA production	17/383	49/8035	3.81e-11	1.47e-09	1.18e-09	HLA-DRB1/TNFRSF13C/HLA-DQA1/HLA-DRA/HLA-DPA1/HLA-DQB1/HLA-DPB1/CXCR4/HLA-DQA2/HLA-DMB/HLA-DMA/CD40/HLA-DOB/TGFB1/HLA-DRB5/HLA-DOA/ICOSLG	17	B4
hsa05320	Autoimmune thyroid disease	17/383	53/8035	1.59e-10	3.86e-09	3.09e-09	HLA-DRB1/HLA-DQA1/HLA-DRA/HLA-DPA1/HLA-DQB1/HLA-DPB1/HLA-DQA2/HLA-E/HLA-DMB/HLA-DMA/HLA-A/CD40/HLA-B/HLA-DOB/HLA-DRB5/HLA-DOA/HLA-F	17	B4
hsa04218	Cellular senescence	17/383	156/8035	0.0011769	0.00904314	0.00724704	CALM1/ZFP36L2/HLA-E/HLA-A/ITPR1/ZFP36L1/RRAS2/HLA-B/PPP1CB/NFATC1/TGFB1/ATM/ETS1/SMAD3/PPP3CA/MYC/HLA-F	17	B4
hsa04062	Chemokine signaling pathway	17/383	189/8035	0.00863064	0.0436926	0.0350147	CXCR5/CCR7/CXCR4/GNB5/CCR6/RASGRP2/PRKCB/CDC42/LYN/RAC2/GRB2/GNAI2/STAT3/GRK6/NCF1/BRAF/NFKBIA	17	B4
hsa05332	Graft-versus-host disease	16/383	42/8035	2.78e-11	1.35e-09	1.08e-09	HLA-DRB1/HLA-DQA1/HLA-DRA/HLA-DPA1/HLA-DQB1/HLA-DPB1/HLA-DQA2/HLA-E/HLA-DMB/HLA-DMA/HLA-A/HLA-B/HLA-DOB/HLA-DRB5/HLA-DOA/HLA-F	16	B4
hsa04940	Type I diabetes mellitus	16/383	43/8035	4.24e-11	1.47e-09	1.18e-09	HLA-DRB1/HLA-DQA1/HLA-DRA/HLA-DPA1/HLA-DQB1/HLA-DPB1/HLA-DQA2/HLA-E/HLA-DMB/HLA-DMA/HLA-A/HLA-B/HLA-DOB/HLA-DRB5/HLA-DOA/HLA-F	16	B4
hsa05323	Rheumatoid arthritis	16/383	93/8035	6.79e-06	7.86e-05	6.29e-05	LTB/HLA-DRB1/HLA-DQA1/HLA-DRA/HLA-DPA1/HLA-DQB1/HLA-DPB1/HLA-DQA2/HLA-DMB/HLA-DMA/HLA-DOB/ATP6V0E1/TGFB1/FOS/HLA-DRB5/HLA-DOA	16	B4
hsa03013	RNA transport	16/383	180/8035	0.0118621	0.0576499	0.0461998	EEF1A1/EIF1/PABPC1/EIF3E/SRRM1/NXT1/EIF4A1/EIF4A2/EIF1B/EIF4B/RAN/EIF3D/EIF2S3/RNPS1/NUP58/UPF2	16	B4
hsa04810	Regulation of actin cytoskeleton	16/383	214/8035	0.0492493	0.206338	0.165356	TMSB4X/EZR/CXCR4/ARPC2/RRAS2/ARPC3/MYL12A/PFN1/PPP1CB/ARPC1B/CDC42/RAC2/MSN/ARHGEF1/MYH9/BRAF	16	B4
hsa03040	Spliceosome	15/383	149/8035	0.00482357	0.0272588	0.0218448	SRSF7/DDX5/SRSF5/HNRNPU/SNU13/BCAS2/LSM7/HNRNPK/SNRPB/SRSF2/SNRPD2/SNRPG/DDX46/SRSF10/CCDC12	15	B4
hsa04015	Rap1 signaling pathway	15/383	210/8035	0.0761824	0.289255	0.231805	CALM1/RASGRP2/PRKCB/PFN1/SIPA1L1/SIPA1/CDC42/RAC2/EVL/GNAI2/PRKD3/SIPA1L3/BRAF/SKAP1/VASP	15	B4
hsa04151	PI3K-Akt signaling pathway	15/383	354/8035	0.720034	0.989681	0.793117	RPS6/IL4R/HSP90AB1/GNB5/NR4A1/IL2RG/YWHAZ/AREG/GRB2/YWHAB/EIF4B/BCL2/CDKN1B/MYC/PPP2R5C	15	B4
hsa04064	NF-kappa B signaling pathway	14/383	104/8035	0.000389058	0.00393921	0.00315683	LTB/TNFRSF13C/BIRC3/TRAF5/CD40/BCL2A1/PRKCB/NFKB2/LYN/MALT1/CYLD/ATM/BCL2/NFKBIA	14	B4
hsa04210	Apoptosis	14/383	136/8035	0.00522942	0.0282389	0.0226302	BIRC3/ITPR1/BCL2A1/CTSS/TUBA1A/FOS/CYCS/ATM/TUBA4A/CTSH/BCL2/PMAIP1/CTSZ/NFKBIA	14	B4
hsa05322	Systemic lupus erythematosus	14/383	136/8035	0.00522942	0.0282389	0.0226302	HLA-DRB1/HLA-DQA1/HLA-DRA/HLA-DPA1/HLA-DQB1/HLA-DPB1/HLA-DQA2/HLA-DMB/HLA-DMA/CD40/HLA-DOB/HLA-DRB5/SNRPB/HLA-DOA	14	B4
hsa05310	Asthma	13/383	31/8035	5.06e-10	1.12e-08	8.96e-09	HLA-DRB1/HLA-DQA1/HLA-DRA/HLA-DPA1/HLA-DQB1/HLA-DPB1/HLA-DQA2/HLA-DMB/HLA-DMA/CD40/HLA-DOB/HLA-DRB5/HLA-DOA	13	B4
hsa04662	B cell receptor signaling pathway	13/383	82/8035	0.000119115	0.00131568	0.00105437	CD79A/CD22/PRKCB/PTPN6/LYN/RAC2/NFATC1/GRB2/FOS/MALT1/PPP3CA/NFKBIA/DAPP1	13	B4
hsa04625	C-type lectin receptor signaling pathway	13/383	104/8035	0.00126424	0.00930937	0.0074604	CALM1/ITPR1/RRAS2/NFKB2/LSP1/NFATC1/MALT1/CYLD/IRF1/EGR3/PPP3CA/PLK3/NFKBIA	13	B4
hsa04928	Parathyroid hormone synthesis, secretion and action	13/383	106/8035	0.00150903	0.010477	0.00839611	NR4A2/MEF2C/JUND/NACA/PDE4B/ITPR1/PRKCB/FOS/AKAP13/ARHGEF1/GNAI2/BCL2/BRAF	13	B4
hsa04380	Osteoclast differentiation	13/383	128/8035	0.00782201	0.0404414	0.0324092	JUNB/JUND/NFKB2/NFATC1/GRB2/TGFB1/FOS/FOSB/CYLD/PPP3CA/SOCS3/NCF1/NFKBIA	13	B4
hsa04650	Natural killer cell mediated cytotoxicity	13/383	131/8035	0.00944085	0.0468189	0.03752	CD48/HLA-E/HLA-A/NCR3/PRKCB/PTPN6/HLA-B/RAC2/NFATC1/GRB2/SH3BP2/PPP3CA/BRAF	13	B4
hsa05202	Transcriptional misregulation in cancer	13/383	192/8035	0.127548	0.407818	0.326819	REL/BIRC3/MEF2C/DDX5/CD40/KLF3/BCL2A1/FUS/ATM/LYL1/BCL6/CDKN1B/MYC	13	B4
hsa05012	Parkinson disease	13/383	249/8035	0.408316	0.800168	0.641244	RPS27A/UBA52/CALM1/ITPR1/DUSP1/COX4I1/UQCRB/TUBA1A/COX7C/NFE2L2/CYCS/GNAI2/TUBA4A	13	B4
hsa04060	Cytokine-cytokine receptor interaction	13/383	294/8035	0.651454	0.977181	0.783099	LTB/TNFRSF13C/CXCR5/CCR7/IL4R/CXCR4/CCR6/CD40/IL2RG/TGFB1/TNFRSF1B/IL27RA/IL16	13	B4
hsa05206	MicroRNAs in cancer	13/383	310/8035	0.724081	0.989681	0.793117	EZR/PRKCB/CD44/GRB2/FOXP1/HNRNPK/RPS6KA5/PDCD4/ATM/STAT3/BCL2/CDKN1B/MYC	13	B4
hsa05210	Colorectal cancer	12/383	86/8035	0.000722989	0.00627451	0.00502831	RAC2/AREG/GRB2/TGFB1/FOS/CYCS/APPL1/BCL2/SMAD3/PMAIP1/MYC/BRAF	12	B4
hsa04666	Fc gamma R-mediated phagocytosis	12/383	93/8035	0.00145925	0.0104294	0.00835794	PTPRC/ARPC2/ARPC3/PRKCB/BIN1/ARPC1B/CDC42/LYN/RAC2/ARF6/NCF1/VASP	12	B4
hsa05150	Staphylococcus aureus infection	12/383	96/8035	0.00192459	0.0116919	0.0093697	HLA-DRB1/HLA-DQA1/HLA-DRA/HLA-DPA1/HLA-DQB1/HLA-DPB1/HLA-DQA2/HLA-DMB/HLA-DMA/HLA-DOB/HLA-DRB5/HLA-DOA	12	B4
hsa04670	Leukocyte transendothelial migration	12/383	113/8035	0.00737584	0.0389637	0.031225	EZR/CXCR4/RHOH/PRKCB/MYL12A/SIPA1/CDC42/RAC2/MSN/GNAI2/NCF1/VASP	12	B4
hsa04068	FoxO signaling pathway	12/383	131/8035	0.0221018	0.103283	0.0827699	STK4/KLF2/GRB2/TGFB1/ATM/STAT3/SMAD3/BCL6/PLK3/CDKN1B/BRAF/PRKAG2	12	B4
hsa04530	Tight junction	12/383	161/8035	0.0826094	0.308832	0.247494	EZR/MYL12A/TUBA1A/CDC42/RAB8B/MSN/ACTR3/TUBA4A/MAP3K1/MYH9/VASP/PRKAG2	12	B4
hsa04024	cAMP signaling pathway	12/383	216/8035	0.334045	0.682125	0.546645	CALM1/ATP2B1/PDE4B/RRAS2/PPP1CB/RAC2/NFATC1/FOS/ORAI1/GNAI2/BRAF/NFKBIA	12	B4
hsa04014	Ras signaling pathway	12/383	232/8035	0.427892	0.812326	0.650987	REL/STK4/CALM1/GNB5/RASGRP2/RRAS2/PRKCB/CDC42/RAC2/GRB2/ARF6/ETS1	12	B4
hsa05135	Yersinia infection	11/383	130/8035	0.0455874	0.194346	0.155746	RHOG/CDC42/RAC2/NFATC1/ARF6/FOS/ARHGEF1/ACTR3/SKAP2/WIPF1/NFKBIA	11	B4
hsa04921	Oxytocin signaling pathway	11/383	154/8035	0.117035	0.387799	0.310777	MEF2C/CALM1/ITPR1/PRKCB/EEF2/PPP1CB/NFATC1/FOS/GNAI2/PPP3CA/PRKAG2	11	B4
hsa04217	Necroptosis	11/383	159/8035	0.137206	0.416764	0.333989	FTH1/BIRC3/HSP90AB1/TRAF5/FTL/PPIA/CHMP1B/CYLD/STAT6/STAT3/BCL2	11	B4
hsa04510	Focal adhesion	11/383	201/8035	0.362619	0.728235	0.583598	BIRC3/FLNA/PRKCB/MYL12A/PPP1CB/CDC42/RAC2/GRB2/BCL2/BRAF/VASP	11	B4
hsa05165	Human papillomavirus infection	11/383	330/8035	0.922451	0.996914	0.798913	HLA-E/HLA-A/HLA-B/CDC42/GRB2/ATP6V0E1/IRF1/ATM/CDKN1B/HLA-F/PPP2R5C	11	B4
hsa05010	Alzheimer disease	11/383	369/8035	0.969051	0.996914	0.798913	CALM1/ITPR1/COX4I1/CDK5R1/UQCRB/TUBA1A/COX7C/CYCS/TUBA4A/PPP3CA/BRAF	11	B4
hsa04660	T cell receptor signaling pathway	10/383	104/8035	0.0260666	0.119513	0.0957761	PTPRC/PTPN6/CDC42/NFATC1/GRB2/MAP3K8/FOS/MALT1/PPP3CA/NFKBIA	10	B4
hsa04668	TNF signaling pathway	10/383	112/8035	0.0405762	0.179273	0.143667	JUNB/BIRC3/TRAF5/MAP3K8/TNFRSF1B/FOS/IRF1/RPS6KA5/SOCS3/NFKBIA	10	B4
hsa04722	Neurotrophin signaling pathway	10/383	119/8035	0.0571624	0.234421	0.187862	CALM1/PRDM4/CDC42/ARHGDIB/GRB2/RPS6KA5/BCL2/MAP3K1/BRAF/NFKBIA	10	B4
hsa04371	Apelin signaling pathway	10/383	137/8035	0.118095	0.387799	0.310777	RPS6/MEF2C/CALM1/GNB5/KLF2/ITPR1/RRAS2/GNAI2/SMAD3/PRKAG2	10	B4
hsa05418	Fluid shear stress and atherosclerosis	10/383	139/8035	0.126509	0.407818	0.326819	MEF2C/CALM1/HSP90AB1/KLF2/DUSP1/RAC2/FOS/NFE2L2/BCL2/NCF1	10	B4
hsa05160	Hepatitis C	10/383	155/8035	0.204655	0.558776	0.447795	YWHAZ/EIF3E/GRB2/YWHAB/CYCS/STAT3/SOCS3/MYC/BRAF/NFKBIA	10	B4
hsa04390	Hippo signaling pathway	10/383	157/8035	0.215641	0.569574	0.456449	BIRC3/PPP1CB/YWHAZ/AREG/TGFB1/CSNK1D/YWHAB/SMAD3/MYC/SAV1	10	B4
hsa04630	JAK-STAT signaling pathway	10/383	162/8035	0.244103	0.581539	0.466038	IL4R/IL2RG/PTPN6/GRB2/STAT6/IL27RA/STAT3/BCL2/SOCS3/MYC	10	B4
hsa03015	mRNA surveillance pathway	9/383	91/8035	0.0288472	0.129812	0.10403	PABPC1/PPP1CB/RNMT/SRRM1/NXT1/PAPOLA/PPP2R5C/RNPS1/UPF2	9	B4
hsa04935	Growth hormone synthesis, secretion and action	9/383	119/8035	0.113996	0.384735	0.308321	JUNB/ITPR1/PRKCB/GRB2/FOS/GNAI2/STAT3/SOCS3/MAP3K1	9	B4
hsa04611	Platelet activation	9/383	124/8035	0.136852	0.416764	0.333989	ITPR1/RASGRP2/MYL12A/PPP1CB/LYN/ORAI1/ARHGEF1/GNAI2/VASP	9	B4
hsa04728	Dopaminergic synapse	9/383	132/8035	0.177903	0.496901	0.398209	CALM1/GNB5/ITPR1/PRKCB/PPP1CB/FOS/GNAI2/PPP3CA/PPP2R5C	9	B4
hsa05162	Measles	9/383	138/8035	0.211942	0.569574	0.456449	RACK1/IL2RG/FOS/CYCS/MSN/STAT3/BCL2/CDKN1B/NFKBIA	9	B4
hsa04261	Adrenergic signaling in cardiomyocytes	9/383	149/8035	0.28018	0.613367	0.491544	CALM1/ATP2B1/CREM/PPP1CB/TPM3/RPS6KA5/GNAI2/BCL2/PPP2R5C	9	B4
hsa04022	cGMP-PKG signaling pathway	9/383	167/8035	0.40161	0.793424	0.635839	MEF2C/CALM1/ATP2B1/ITPR1/PPP1CB/NFATC1/GNAI2/PPP3CA/VASP	9	B4
hsa04540	Gap junction	8/383	88/8035	0.0578817	0.234421	0.187862	ITPR1/PRKCB/TUBA1A/GRB2/CSNK1D/GNAI2/TUBA4A/MAP3K2	8	B4
hsa05222	Small cell lung cancer	8/383	92/8035	0.0713724	0.275293	0.220616	BIRC3/TRAF5/CYCS/BCL2/TRAF4/CDKN1B/MYC/NFKBIA	8	B4
hsa04713	Circadian entrainment	8/383	97/8035	0.0907202	0.334015	0.267675	CALM1/GNB5/ITPR1/PRKCB/FOS/RPS6KA5/GNAI2/PER1	8	B4
hsa04925	Aldosterone synthesis and secretion	8/383	98/8035	0.0949205	0.344264	0.275888	NR4A2/CALM1/ATP2B1/ITPR1/NR4A1/PRKCB/ORAI1/PRKD3	8	B4
hsa04933	AGE-RAGE signaling pathway in diabetic complications	8/383	100/8035	0.103649	0.361832	0.289967	PRKCB/CDC42/NFATC1/TGFB1/STAT3/BCL2/SMAD3/CDKN1B	8	B4
hsa04114	Oocyte meiosis	8/383	128/8035	0.265857	0.591496	0.474017	CALM1/ITPR1/PPP1CB/YWHAZ/STAG3/YWHAB/PPP3CA/PPP2R5C	8	B4
hsa04142	Lysosome	8/383	128/8035	0.265857	0.591496	0.474017	LAPTM5/GGA2/CTSS/IDS/CTSH/CTSZ/LAPTM4A/HGSNAT	8	B4
hsa04910	Insulin signaling pathway	8/383	137/8035	0.329273	0.67808	0.543404	RPS6/CALM1/PPP1CB/GRB2/SOCS3/MKNK2/BRAF/PRKAG2	8	B4
hsa04932	Non-alcoholic fatty liver disease (NAFLD)	8/383	149/8035	0.416948	0.802315	0.642964	COX4I1/UQCRB/CDC42/COX7C/TGFB1/CYCS/SOCS3/PRKAG2	8	B4
hsa05225	Hepatocellular carcinoma	8/383	168/8035	0.553046	0.901947	0.722808	PRKCB/GRB2/TGFB1/NFE2L2/SMAD3/MYC/SMARCA2/BRAF	8	B4
hsa04621	NOD-like receptor signaling pathway	8/383	181/8035	0.638105	0.969122	0.776641	BIRC3/HSP90AB1/ITPR1/TRAF5/TXNIP/TANK/BCL2/NFKBIA	8	B4
hsa04020	Calcium signaling pathway	8/383	196/8035	0.723976	0.989681	0.793117	CXCR4/CALM1/ATP2B1/ITPR1/PRKCB/P2RX5/ORAI1/PPP3CA	8	B4
hsa05016	Huntington disease	8/383	306/8035	0.981216	0.996914	0.798913	ITPR1/COX4I1/UQCRB/TUBA1A/COX7C/SOD1/CYCS/TUBA4A	8	B4
hsa05340	Primary immunodeficiency	7/383	38/8035	0.00185248	0.0115424	0.00924989	TNFRSF13C/CD79A/PTPRC/CD40/IL2RG/CIITA/ORAI1	7	B4
hsa05220	Chronic myeloid leukemia	7/383	76/8035	0.0693496	0.271806	0.217821	GRB2/TGFB1/SMAD3/CDKN1B/MYC/BRAF/NFKBIA	7	B4
hsa05235	PD-L1 expression and PD-1 checkpoint pathway in cancer	7/383	89/8035	0.131198	0.414039	0.331805	PTPN6/EML4/NFATC1/FOS/STAT3/PPP3CA/NFKBIA	7	B4
hsa04912	GnRH signaling pathway	7/383	93/8035	0.154421	0.457612	0.366724	CALM1/ITPR1/PRKCB/CDC42/GRB2/MAP3K1/MAP3K2	7	B4
hsa04657	IL-17 signaling pathway	7/383	94/8035	0.160507	0.464323	0.372102	HSP90AB1/JUND/TRAF5/FOS/FOSB/TRAF4/NFKBIA	7	B4
hsa04931	Insulin resistance	7/383	108/8035	0.255628	0.591496	0.474017	PRKCB/PPP1CB/STAT3/NR1H2/SOCS3/NFKBIA/PRKAG2	7	B4
hsa04110	Cell cycle	7/383	124/8035	0.378781	0.754458	0.604612	YWHAZ/TGFB1/YWHAB/ATM/SMAD3/CDKN1B/MYC	7	B4
hsa04270	Vascular smooth muscle contraction	7/383	135/8035	0.465413	0.835824	0.669818	CALM1/ITPR1/PRKCB/PPP1CB/ARHGEF1/MYH9/BRAF	7	B4
hsa04915	Estrogen signaling pathway	7/383	138/8035	0.488659	0.850489	0.68157	CALM1/HSP90AB1/ITPR1/GRB2/FOS/GNAI2/BCL2	7	B4
hsa04120	Ubiquitin mediated proteolysis	7/383	140/8035	0.503994	0.850489	0.68157	RPS27A/UBA52/BIRC3/UBE2D3/UBE2D2/SOCS3/MAP3K1	7	B4
hsa05226	Gastric cancer	7/383	149/8035	0.570867	0.918215	0.735845	GRB2/TGFB1/BCL2/SMAD3/CDKN1B/MYC/BRAF	7	B4
hsa04360	Axon guidance	7/383	181/8035	0.766796	0.996914	0.798913	CXCR4/MYL12A/CDC42/RAC2/ABLIM1/GNAI2/PPP3CA	7	B4
hsa05034	Alcoholism	7/383	187/8035	0.795075	0.996914	0.798913	CALM1/GNB5/PPP1CB/GRB2/FOSB/GNAI2/BRAF	7	B4
hsa04714	Thermogenesis	7/383	231/8035	0.929611	0.996914	0.798913	RPS6/COX4I1/UQCRB/COX7C/GRB2/SMARCA2/PRKAG2	7	B4
hsa04720	Long-term potentiation	6/383	67/8035	0.0987632	0.352933	0.282836	CALM1/ITPR1/PRKCB/PPP1CB/PPP3CA/BRAF	6	B4
hsa05223	Non-small cell lung cancer	6/383	68/8035	0.104231	0.361832	0.289967	STK4/PRKCB/EML4/GRB2/STAT3/BRAF	6	B4
hsa05031	Amphetamine addiction	6/383	69/8035	0.109854	0.37598	0.301305	CALM1/PRKCB/PPP1CB/FOS/FOSB/PPP3CA	6	B4
hsa05212	Pancreatic cancer	6/383	76/8035	0.153326	0.457612	0.366724	CDC42/RAC2/TGFB1/STAT3/SMAD3/BRAF	6	B4
hsa01521	EGFR tyrosine kinase inhibitor resistance	6/383	79/8035	0.173984	0.491606	0.393966	RPS6/PRKCB/GRB2/STAT3/BCL2/BRAF	6	B4
hsa03018	RNA degradation	6/383	79/8035	0.173984	0.491606	0.393966	BTG1/PABPC1/LSM7/DDX6/CNOT6L/EXOSC6	6	B4
hsa04012	ErbB signaling pathway	6/383	85/8035	0.218398	0.570653	0.457314	PRKCB/AREG/GRB2/CDKN1B/MYC/BRAF	6	B4
hsa05032	Morphine addiction	6/383	91/8035	0.266148	0.591496	0.474017	GNB5/PDE4B/PDE7A/PRKCB/GNAI2/GRK6	6	B4
hsa05215	Prostate cancer	6/383	97/8035	0.31622	0.656766	0.526323	HSP90AB1/GRB2/BCL2/CDKN1B/BRAF/NFKBIA	6	B4
hsa04061	Viral protein interaction with cytokine and cytokine receptor	6/383	100/8035	0.341809	0.692163	0.55469	CXCR5/CCR7/CXCR4/CCR6/IL2RG/TNFRSF1B	6	B4
hsa04066	HIF-1 signaling pathway	6/383	109/8035	0.419317	0.802315	0.642964	RPS6/PRKCB/STAT3/BCL2/CDKN1B/MKNK2	6	B4
hsa03008	Ribosome biogenesis in eukaryotes	6/383	112/8035	0.445023	0.831851	0.666634	SNU13/NXT1/SBDS/RAN/FBL/TCOF1	6	B4
hsa04725	Cholinergic synapse	6/383	113/8035	0.453544	0.835824	0.669818	GNB5/ITPR1/PRKCB/FOS/GNAI2/BCL2	6	B4
hsa04724	Glutamatergic synapse	6/383	114/8035	0.462036	0.835824	0.669818	GNB5/ITPR1/PRKCB/SLC38A1/GNAI2/PPP3CA	6	B4
hsa04726	Serotonergic synapse	6/383	115/8035	0.470494	0.835824	0.669818	GNB5/ITPR1/DUSP1/PRKCB/GNAI2/BRAF	6	B4
hsa04926	Relaxin signaling pathway	6/383	129/8035	0.583775	0.927172	0.743023	GNB5/GRB2/TGFB1/FOS/GNAI2/NFKBIA	6	B4
hsa04140	Autophagy - animal	6/383	137/8035	0.642641	0.969948	0.777303	ITPR1/RRAS2/UVRAG/TANK/BCL2/C9orf72	6	B4
hsa04550	Signaling pathways regulating pluripotency of stem cells	6/383	143/8035	0.683365	0.989411	0.7929	GRB2/STAT3/SMAD3/MYC/ID3/SKIL	6	B4
hsa04934	Cushing syndrome	6/383	155/8035	0.75535	0.995667	0.797914	ITPR1/NR4A1/ORAI1/GNAI2/CDKN1B/BRAF	6	B4
hsa04310	Wnt signaling pathway	6/383	160/8035	0.781571	0.996914	0.798913	PRKCB/RAC2/NFATC1/SMAD3/PPP3CA/MYC	6	B4
hsa04141	Protein processing in endoplasmic reticulum	6/383	167/8035	0.814646	0.996914	0.798913	HSP90AB1/NFE2L2/UBE2D3/UBE2D2/BCL2/DNAJA1	6	B4
hsa04216	Ferroptosis	5/383	41/8035	0.0438991	0.190491	0.152657	FTH1/FTL/SAT1/GPX4/PRNP	5	B4
hsa05014	Amyotrophic lateral sclerosis (ALS)	5/383	57/8035	0.134145	0.416764	0.333989	TNFRSF1B/SOD1/CYCS/BCL2/PPP3CA	5	B4
hsa04730	Long-term depression	5/383	60/8035	0.156545	0.458317	0.367289	ITPR1/PRKCB/LYN/GNAI2/BRAF	5	B4
hsa05221	Acute myeloid leukemia	5/383	67/8035	0.214028	0.569574	0.456449	BCL2A1/GRB2/STAT3/MYC/BRAF	5	B4
hsa04137	Mitophagy - animal	5/383	68/8035	0.222742	0.574178	0.460139	RPS27A/UBA52/TOMM7/RRAS2/USP15	5	B4
hsa04920	Adipocytokine signaling pathway	5/383	69/8035	0.231562	0.574178	0.460139	TNFRSF1B/STAT3/SOCS3/NFKBIA/PRKAG2	5	B4
hsa04924	Renin secretion	5/383	69/8035	0.231562	0.574178	0.460139	CALM1/ITPR1/ORAI1/GNAI2/PPP3CA	5	B4
hsa05211	Renal cell carcinoma	5/383	69/8035	0.231562	0.574178	0.460139	CDC42/GRB2/TGFB1/ETS1/BRAF	5	B4
hsa04622	RIG-I-like receptor signaling pathway	5/383	70/8035	0.24048	0.578579	0.463666	DDX3X/CYLD/TANK/MAP3K1/NFKBIA	5	B4
hsa04917	Prolactin signaling pathway	5/383	70/8035	0.24048	0.578579	0.463666	GRB2/FOS/IRF1/STAT3/SOCS3	5	B4
hsa05120	Epithelial cell signaling in Helicobacter pylori infection	5/383	70/8035	0.24048	0.578579	0.463666	CDC42/LYN/ATP6V0E1/CSK/NFKBIA	5	B4
hsa01524	Platinum drug resistance	5/383	73/8035	0.267755	0.591496	0.474017	BIRC3/CYCS/ATM/BCL2/PMAIP1	5	B4
hsa04115	p53 signaling pathway	5/383	73/8035	0.267755	0.591496	0.474017	CD82/CYCS/ATM/BCL2/PMAIP1	5	B4
hsa05100	Bacterial invasion of epithelial cells	5/383	73/8035	0.267755	0.591496	0.474017	ARPC2/ARPC3/RHOG/ARPC1B/CDC42	5	B4
hsa04971	Gastric acid secretion	5/383	76/8035	0.29567	0.630245	0.50507	EZR/CALM1/ITPR1/PRKCB/GNAI2	5	B4
hsa05133	Pertussis	5/383	76/8035	0.29567	0.630245	0.50507	IRF8/CALM1/FOS/IRF1/GNAI2	5	B4
hsa04970	Salivary secretion	5/383	93/8035	0.457579	0.835824	0.669818	CALM1/ATP2B1/ITPR1/VAMP2/PRKCB	5	B4
hsa04350	TGF-beta signaling pathway	5/383	94/8035	0.46694	0.835824	0.669818	TGIF1/TGFB1/SMAD3/MYC/ID3	5	B4
hsa01522	Endocrine resistance	5/383	98/8035	0.503849	0.850489	0.68157	GRB2/FOS/BCL2/CDKN1B/BRAF	5	B4
hsa05231	Choline metabolism in cancer	5/383	98/8035	0.503849	0.850489	0.68157	PRKCB/CHPT1/RAC2/GRB2/FOS	5	B4
hsa04922	Glucagon signaling pathway	5/383	106/8035	0.574357	0.918215	0.735845	CALM1/ITPR1/PPP4R3A/PPP3CA/PRKAG2	5	B4
hsa04071	Sphingolipid signaling pathway	5/383	119/8035	0.676597	0.989411	0.7929	PRKCB/RAC2/GNAI2/BCL2/PPP2R5C	5	B4
hsa00230	Purine metabolism	5/383	130/8035	0.749327	0.995008	0.797386	PDE4B/ADK/PDE7A/APRT/NT5C	5	B4
hsa05224	Breast cancer	5/383	147/8035	0.836761	0.996914	0.798913	NFKB2/GRB2/FOS/MYC/BRAF	5	B4
hsa04150	mTOR signaling pathway	5/383	155/8035	0.868349	0.996914	0.798913	RPS6/PRKCB/GRB2/EIF4B/BRAF	5	B4
hsa04215	Apoptosis - multiple species	4/383	32/8035	0.063808	0.254186	0.203701	BIRC3/CYCS/BCL2/PMAIP1	4	B4
hsa05134	Legionellosis	4/383	57/8035	0.287796	0.624414	0.500397	EEF1A1/NFKB2/CYCS/NFKBIA	4	B4
hsa04370	VEGF signaling pathway	4/383	59/8035	0.309526	0.650518	0.521316	PRKCB/CDC42/RAC2/PPP3CA	4	B4
hsa04520	Adherens junction	4/383	71/8035	0.440587	0.829943	0.665105	PTPN6/CDC42/RAC2/SMAD3	4	B4
hsa05214	Glioma	4/383	75/8035	0.482991	0.850484	0.681566	CALM1/PRKCB/GRB2/BRAF	4	B4
hsa04260	Cardiac muscle contraction	4/383	87/8035	0.601133	0.948541	0.760147	COX4I1/UQCRB/TPM3/COX7C	4	B4
hsa04727	GABAergic synapse	4/383	89/8035	0.61919	0.964507	0.772943	GNB5/PRKCB/SLC38A1/GNAI2	4	B4
hsa04750	Inflammatory mediator regulation of TRP channels	4/383	100/8035	0.708985	0.989681	0.793117	CALM1/ITPR1/PRKCB/PPP1CB	4	B4
hsa05142	Chagas disease (American trypanosomiasis)	4/383	102/8035	0.723539	0.989681	0.793117	TGFB1/FOS/GNAI2/NFKBIA	4	B4
hsa04620	Toll-like receptor signaling pathway	4/383	104/8035	0.737547	0.990188	0.793523	CD40/MAP3K8/FOS/NFKBIA	4	B4
hsa00190	Oxidative phosphorylation	4/383	133/8035	0.884701	0.996914	0.798913	COX4I1/UQCRB/COX7C/ATP6V0E1	4	B4
hsa04723	Retrograde endocannabinoid signaling	4/383	148/8035	0.927776	0.996914	0.798913	GNB5/ITPR1/PRKCB/GNAI2	4	B4
hsa04710	Circadian rhythm	3/383	31/8035	0.182007	0.502589	0.402768	CSNK1D/PER1/PRKAG2	3	B4
hsa05216	Thyroid cancer	3/383	37/8035	0.257871	0.591496	0.474017	TPM3/MYC/BRAF	3	B4
hsa05219	Bladder cancer	3/383	41/8035	0.310536	0.650518	0.521316	RPS6KA5/MYC/BRAF	3	B4
hsa05030	Cocaine addiction	3/383	49/8035	0.415775	0.802315	0.642964	CDK5R1/FOSB/GNAI2	3	B4
hsa05213	Endometrial cancer	3/383	58/8035	0.52722	0.871527	0.69843	GRB2/MYC/BRAF	3	B4
hsa04978	Mineral absorption	3/383	59/8035	0.538882	0.884786	0.709056	FTH1/ATP2B1/FTL	3	B4
hsa00310	Lysine degradation	3/383	61/8035	0.561705	0.909961	0.72923	NSD3/PRDM2/KMT2E	3	B4
hsa04927	Cortisol synthesis and secretion	3/383	65/8035	0.605236	0.948854	0.760398	ITPR1/NR4A1/ORAI1	3	B4
hsa04664	Fc epsilon RI signaling pathway	3/383	68/8035	0.635951	0.969122	0.776641	LYN/RAC2/GRB2	3	B4
hsa05410	Hypertrophic cardiomyopathy (HCM)	3/383	90/8035	0.809993	0.996914	0.798913	TPM3/TGFB1/PRKAG2	3	B4
hsa04070	Phosphatidylinositol signaling system	3/383	97/8035	0.848157	0.996914	0.798913	CALM1/ITPR1/PRKCB	3	B4
hsa00564	Glycerophospholipid metabolism	3/383	98/8035	0.853029	0.996914	0.798913	CHPT1/PLPP5/LPCAT1	3	B4
hsa04914	Progesterone-mediated oocyte maturation	3/383	99/8035	0.857764	0.996914	0.798913	HSP90AB1/GNAI2/BRAF	3	B4
hsa04916	Melanogenesis	3/383	101/8035	0.866836	0.996914	0.798913	CALM1/PRKCB/GNAI2	3	B4
hsa04972	Pancreatic secretion	3/383	102/8035	0.871178	0.996914	0.798913	ATP2B1/ITPR1/PRKCB	3	B4
hsa04152	AMPK signaling pathway	3/383	120/8035	0.930523	0.996914	0.798913	EEF2/PPP2R5C/PRKAG2	3	B4
hsa04072	Phospholipase D signaling pathway	3/383	148/8035	0.975061	0.996914	0.798913	RRAS2/GRB2/ARF6	3	B4
hsa00531	Glycosaminoglycan degradation	2/383	19/8035	0.228593	0.574178	0.460139	IDS/HGSNAT	2	B4
hsa03410	Base excision repair	2/383	33/8035	0.471226	0.835824	0.669818	POLE4/MBD4	2	B4
hsa05020	Prion diseases	2/383	35/8035	0.502427	0.850489	0.68157	SOD1/PRNP	2	B4
hsa04962	Vasopressin-regulated water reabsorption	2/383	44/8035	0.627353	0.964853	0.77322	VAMP2/ARHGDIB	2	B4
hsa00565	Ether lipid metabolism	2/383	49/8035	0.685548	0.989411	0.7929	CHPT1/LPCAT1	2	B4
hsa00330	Arginine and proline metabolism	2/383	50/8035	0.696252	0.989411	0.7929	SAT1/AMD1	2	B4
hsa00510	N-Glycan biosynthesis	2/383	50/8035	0.696252	0.989411	0.7929	ALG13/MGAT5	2	B4
hsa04340	Hedgehog signaling pathway	2/383	50/8035	0.696252	0.989411	0.7929	CSNK1D/BCL2	2	B4
hsa05144	Malaria	2/383	50/8035	0.696252	0.989411	0.7929	CD40/TGFB1	2	B4
hsa04961	Endocrine and other factor-regulated calcium reabsorption	2/383	53/8035	0.726567	0.989681	0.793117	ATP2B1/PRKCB	2	B4
hsa04213	Longevity regulating pathway - multiple species	2/383	62/8035	0.802513	0.996914	0.798913	SOD1/PRKAG2	2	B4
hsa04929	GnRH secretion	2/383	64/8035	0.81662	0.996914	0.798913	ITPR1/PRKCB	2	B4
hsa04918	Thyroid hormone synthesis	2/383	75/8035	0.879215	0.996914	0.798913	ITPR1/PRKCB	2	B4
hsa04721	Synaptic vesicle cycle	2/383	78/8035	0.892495	0.996914	0.798913	VAMP2/ATP6V0E1	2	B4
hsa04911	Insulin secretion	2/383	86/8035	0.921569	0.996914	0.798913	VAMP2/PRKCB	2	B4
hsa04512	ECM-receptor interaction	2/383	88/8035	0.927586	0.996914	0.798913	CD44/CD47	2	B4
hsa04211	Longevity regulating pathway	2/383	89/8035	0.930429	0.996914	0.798913	APPL1/PRKAG2	2	B4
hsa05414	Dilated cardiomyopathy (DCM)	2/383	96/8035	0.947566	0.996914	0.798913	TPM3/TGFB1	2	B4
hsa05146	Amoebiasis	2/383	102/8035	0.958982	0.996914	0.798913	PRKCB/TGFB1	2	B4
hsa04919	Thyroid hormone signaling pathway	2/383	121/8035	0.98146	0.996914	0.798913	PRKCB/MYC	2	B4
hsa05017	Spinocerebellar ataxia	2/383	133/8035	0.988894	0.9971	0.799063	ITPR1/PRKCB	2	B4
hsa04080	Neuroactive ligand-receptor interaction	2/383	341/8035	0.999999	1	0.801386	P2RX5/P2RY10	2	B4
hsa00533	Glycosaminoglycan biosynthesis - keratan sulfate	1/383	14/8035	0.49557	0.850489	0.68157	ST3GAL1	1	B4
hsa00603	Glycosphingolipid biosynthesis - globo and isoglobo series	1/383	15/8035	0.519657	0.864908	0.693125	ST3GAL1	1	B4
hsa00604	Glycosphingolipid biosynthesis - ganglio series	1/383	15/8035	0.519657	0.864908	0.693125	ST3GAL1	1	B4
hsa00100	Steroid biosynthesis	1/383	20/8035	0.623932	0.964853	0.77322	SC5D	1	B4
hsa00900	Terpenoid backbone biosynthesis	1/383	22/8035	0.659016	0.98246	0.78733	IDI1	1	B4
hsa00515	Mannose type O-glycan biosynthesis	1/383	23/8035	0.675314	0.989411	0.7929	LARGE1	1	B4
hsa00062	Fatty acid elongation	1/383	27/8035	0.733097	0.989681	0.793117	ELOVL5	1	B4
hsa01040	Biosynthesis of unsaturated fatty acids	1/383	27/8035	0.733097	0.989681	0.793117	ELOVL5	1	B4
hsa04966	Collecting duct acid secretion	1/383	27/8035	0.733097	0.989681	0.793117	ATP6V0E1	1	B4
hsa04744	Phototransduction	1/383	28/8035	0.745862	0.995008	0.797386	CALM1	1	B4
hsa04392	Hippo signaling pathway - multiple species	1/383	29/8035	0.758018	0.995667	0.797914	SAV1	1	B4
hsa00512	Mucin type O-glycan biosynthesis	1/383	32/8035	0.791116	0.996914	0.798913	ST3GAL1	1	B4
hsa04130	SNARE interactions in vesicular transport	1/383	33/8035	0.801113	0.996914	0.798913	VAMP2	1	B4
hsa00760	Nicotinate and nicotinamide metabolism	1/383	35/8035	0.819697	0.996914	0.798913	NT5C	1	B4
hsa03030	DNA replication	1/383	36/8035	0.828329	0.996914	0.798913	POLE4	1	B4
hsa04960	Aldosterone-regulated sodium reabsorption	1/383	37/8035	0.836549	0.996914	0.798913	PRKCB	1	B4
hsa05143	African trypanosomiasis	1/383	37/8035	0.836549	0.996914	0.798913	PRKCB	1	B4
hsa00513	Various types of N-glycan biosynthesis	1/383	39/8035	0.851829	0.996914	0.798913	ALG13	1	B4
hsa03440	Homologous recombination	1/383	41/8035	0.865684	0.996914	0.798913	ATM	1	B4
hsa00380	Tryptophan metabolism	1/383	42/8035	0.87212	0.996914	0.798913	KYNU	1	B4
hsa04930	Type II diabetes mellitus	1/383	46/8035	0.894928	0.996914	0.798913	SOCS3	1	B4
hsa03420	Nucleotide excision repair	1/383	47/8035	0.899965	0.996914	0.798913	POLE4	1	B4
hsa04973	Carbohydrate digestion and absorption	1/383	47/8035	0.899965	0.996914	0.798913	PRKCB	1	B4
hsa00270	Cysteine and methionine metabolism	1/383	49/8035	0.909329	0.996914	0.798913	AMD1	1	B4
hsa05110	Vibrio cholerae infection	1/383	50/8035	0.913677	0.996914	0.798913	ATP6V0E1	1	B4
hsa04923	Regulation of lipolysis in adipocytes	1/383	56/8035	0.935731	0.996914	0.798913	GNAI2	1	B4
hsa00240	Pyrimidine metabolism	1/383	57/8035	0.938816	0.996914	0.798913	NT5C	1	B4
hsa00480	Glutathione metabolism	1/383	57/8035	0.938816	0.996914	0.798913	GPX4	1	B4
hsa01212	Fatty acid metabolism	1/383	57/8035	0.938816	0.996914	0.798913	ELOVL5	1	B4
hsa00561	Glycerolipid metabolism	1/383	61/8035	0.949748	0.996914	0.798913	PLPP5	1	B4
hsa00590	Arachidonic acid metabolism	1/383	63/8035	0.954459	0.996914	0.798913	PTGES3	1	B4
hsa04623	Cytosolic DNA-sensing pathway	1/383	63/8035	0.954459	0.996914	0.798913	NFKBIA	1	B4
hsa05230	Central carbon metabolism in cancer	1/383	70/8035	0.96774	0.996914	0.798913	MYC	1	B4
hsa05218	Melanoma	1/383	72/8035	0.970768	0.996914	0.798913	BRAF	1	B4
hsa04146	Peroxisome	1/383	83/8035	0.983009	0.996914	0.798913	SOD1	1	B4
hsa04610	Complement and coagulation cascades	1/383	85/8035	0.984606	0.996914	0.798913	CD55	1	B4
hsa04740	Olfactory transduction	1/383	448/8035	1	1	0.801386	CALM1	1	B4
hsa05010	Alzheimer disease	101/916	369/8035	3.76e-18	2.28e-16	1.83e-16	MME/GAPDH/TUBB/VDAC1/TNFRSF1A/PIK3R1/ATP5F1C/ATP5MC3/SEM1/COX6C/ATP5MC2/CALM2/ATP5F1B/SLC25A5/RTN4/PIK3CD/APP/IRS2/GNAQ/PSMA6/PSMA7/ATP5PF/COX6A1/UQCR10/COX8A/TUBA1B/NDUFA4/PSMA1/PPP3R1/TUBA1A/CSNK1A1/ATP5F1A/PSMA4/COX7A2L/NDUFB1/UQCRFS1/CALM3/KIF5B/RTN3/NDUFA5/UQCRC2/PSMB7/UQCRC1/NDUFS3/PSMA2/WIPI2/VDAC2/SDHA/PSMB6/VDAC3/NDUFB4/COX4I1/NDUFB10/MAPK1/ATP5PO/NDUFB3/COX7B/NAE1/PIK3CA/PSMB2/PSMC3/PSM…	101	B5
hsa05016	Huntington disease	97/916	306/8035	1.9e-22	1.44e-20	1.16e-20	SOD2/TUBB/VDAC1/HDAC2/ATP5F1C/ATP5MC3/SEM1/COX6C/ATP5MC2/ATP5F1B/SLC25A5/GNAQ/PSMA6/PSMA7/ATP5PF/COX6A1/TP53/UQCR10/COX8A/POLR2A/TUBA1B/NDUFA4/PSMA1/CREB1/CLTC/POLR2G/TUBA1A/ATP5F1A/PSMA4/COX7A2L/NDUFB1/AP2M1/UQCRFS1/KIF5B/NDUFA5/UQCRC2/REST/PSMB7/UQCRC1/NDUFS3/PSMA2/WIPI2/VDAC2/CLTA/SDHA/PSMB6/VDAC3/NDUFB4/COX4I1/NDUFB10/ATP5PO/NDUFB3/COX7B/PSMB2/PSMC3/CREBBP/POLR2B/PSMA5/UQCRH/AP2B1/PSMB3/RB1CC…	97	B5
hsa05012	Parkinson disease	90/916	249/8035	1.93e-25	2.92e-23	2.34e-23	TUBB/VDAC1/ATP5F1C/ATP5MC3/SEM1/COX6C/ATP5MC2/CALM2/ATP5F1B/SLC25A5/PSMA6/PSMA7/UBB/ATP5PF/PARK7/COX6A1/TP53/UQCR10/GNAI2/COX8A/GNAS/TUBA1B/NDUFA4/GNAI3/PRKACB/PSMA1/TUBA1A/ATP5F1A/PSMA4/COX7A2L/NDUFB1/UQCRFS1/CALM3/KIF5B/TXN/UBE2L3/NDUFA5/UQCRC2/PSMB7/UQCRC1/NDUFS3/PSMA2/UBA52/VDAC2/SDHA/PSMB6/VDAC3/NDUFB4/COX4I1/NDUFB10/ATP5PO/NDUFB3/COX7B/PSMB2/PSMC3/PSMA5/UQCRH/PSMB3/NDUFS6/NDUFB11/NDUFA13/PS…	90	B5
hsa04714	Thermogenesis	72/916	231/8035	2e-16	8.67e-15	6.96e-15	SMARCD2/ACTG1/SMARCA4/KDM1A/ATP5F1C/ATP5MC3/ATP5MG/COX6C/ATP5MC2/ACTB/ATP5F1B/ATP5PF/COX6A1/CPT1A/UQCR10/COX8A/GNAS/ATP5MF/NDUFA4/PRKACB/CREB1/SMARCE1/ATP5F1A/COX7A2L/NDUFB1/UQCRFS1/NDUFA5/ARID1A/UQCRC2/RPS6/ACTL6A/UQCRC1/NDUFS3/SMARCA2/SMARCD1/ARID1B/SDHA/NDUFB4/COX4I1/NDUFB10/ATP5PO/NDUFB3/COX7B/SMARCC2/UQCRH/SMARCC1/NDUFS6/NDUFB11/NDUFA13/UQCRB/NDUFV2/COX5B/NDUFAF6/COX7A2/COX6B1/NDUFAF3/NDUFB7…	72	B5
hsa03040	Spliceosome	71/916	149/8035	6.37e-29	1.93e-26	1.55e-26	HNRNPA1/SNRPF/HNRNPC/SRSF3/HNRNPK/SRSF10/HNRNPA3/HNRNPM/SNRPD1/SRSF2/HNRNPU/DHX15/SNRPE/RBMX/PRPF38A/RBM25/LSM7/SRSF9/HSPA8/SNRNP200/SF3A3/PRPF40A/TRA2B/SF3A2/SNRPD2/SF3B6/SNRPB/ACIN1/ALYREF/SRSF1/SF3B1/SNW1/RBM17/PCBP1/SNRPA/LSM3/PRPF8/THOC2/RBM8A/SYF2/SRSF5/DDX46/MAGOH/SNRPC/DDX39B/LSM2/SRSF6/SNRPD3/CDC5L/SF3B2/TCERG1/DDX5/SRSF4/U2SURP/SNRPG/SRSF7/LSM4/LSM5/PRPF38B/CWC15/SNRPA1/SNRNP70/SNRPB2/T…	71	B5
hsa04110	Cell cycle	59/916	124/8035	3.8e-24	3.83e-22	3.08e-22	E2F2/ORC6/MAD2L1/CDK1/CCNA2/CCNB2/MCM4/CHEK1/CCND3/E2F1/BUB1B/CDC20/PTTG1/CDK6/MCM2/WEE1/CDC6/BUB1/MCM3/MDM2/CCNE2/CDK2/PCNA/MCM7/MAD2L2/MCM6/RAD21/HDAC2/YWHAQ/SMC1A/PLK1/TFDP1/STAG2/SMC3/CDKN2C/TP53/CCNB1/BUB3/GADD45A/PRKDC/YWHAE/SMAD2/STAG1/SKP1/YWHAH/TFDP2/MCM5/RB1/YWHAB/CREBBP/ANAPC5/HDAC1/CDKN2D/ANAPC11/RBX1/CDKN1B/YWHAZ/DBF4/ATM	59	B5
hsa00190	Oxidative phosphorylation	53/916	133/8035	1.59e-17	8.03e-16	6.44e-16	ATP5F1C/ATP5MC3/ATP5MG/COX6C/ATP5MC2/ATP5F1B/ATP5PF/COX6A1/UQCR10/COX8A/ATP5MF/NDUFA4/ATP5F1A/COX7A2L/NDUFB1/UQCRFS1/NDUFA5/UQCRC2/UQCRC1/NDUFS3/ATP6V1D/SDHA/NDUFB4/COX4I1/NDUFB10/ATP5PO/LHPP/NDUFB3/COX7B/ATP6V1G1/UQCRH/NDUFS6/NDUFB11/NDUFA13/UQCRB/NDUFV2/COX5B/COX7A2/COX6B1/NDUFB7/NDUFA2/NDUFB8/UQCRQ/ATP5ME/ATP5PB/NDUFC2/NDUFA7/NDUFA6/NDUFS8/ATP5PD/NDUFAB1/COX5A/NDUFA11	53	B5
hsa05166	Human T-cell leukemia virus 1 infection	51/916	219/8035	3.44e-07	6.95e-06	5.58e-06	E2F2/MAD2L1/CCNA2/CCNB2/CHEK1/ETS2/CCND3/E2F1/BUB1B/CDC20/PTTG1/XPO1/CCNE2/CDK2/VDAC1/TNFRSF1A/TCF3/PIK3R1/PTEN/SLC25A5/PIK3CD/CDKN2C/MAP3K3/TP53/BUB3/RAN/SMAD2/RANBP1/PRKACB/PPP3R1/CREB1/TLN1/VDAC2/RB1/VDAC3/MAPK1/PIK3CA/JAK1/CREBBP/DLG1/AKT3/HLA-DRB5/ANAPC5/HLA-DRA/ANAPC11/PPP3CC/FDPS/HLA-DMA/HLA-A/ATF4/ATM	51	B5
hsa05203	Viral carcinogenesis	49/916	204/8035	2.16e-07	4.67e-06	3.75e-06	CDK1/CCNA2/CHEK1/CCND3/CDC20/CDK6/ACTN1/MDM2/CCNE2/CDK2/HNRNPK/HDAC2/YWHAQ/PIK3R1/RHOA/HIST1H4E/HIST1H4C/PIK3CD/PKM/TP53/CHD4/YWHAE/RAC1/RANBP1/MAPKAPK2/PRKACB/YWHAH/CREB1/PMAIP1/SNW1/ACTN4/HDAC7/RB1/VDAC3/MAPK1/YWHAB/PIK3CA/JAK1/DDX3X/CREBBP/DLG1/HDAC1/GTF2A2/USP7/CDKN1B/YWHAZ/RBPJ/HLA-A/ATF4	49	B5
hsa04932	Non-alcoholic fatty liver disease (NAFLD)	48/916	149/8035	6.41e-12	1.94e-10	1.56e-10	MLXIP/TNFRSF1A/PIK3R1/COX6C/PIK3CD/IRS2/COX6A1/UQCR10/COX8A/RAC1/NDUFA4/COX7A2L/NDUFB1/UQCRFS1/NDUFA5/UQCRC2/UQCRC1/NDUFS3/SDHA/NDUFB4/COX4I1/NDUFB10/NDUFB3/COX7B/PIK3CA/UQCRH/AKT3/NDUFS6/NDUFB11/NDUFA13/UQCRB/NDUFV2/COX5B/COX7A2/COX6B1/NDUFB7/NDUFA2/NDUFB8/UQCRQ/INSR/NDUFC2/NDUFA7/NDUFA6/NDUFS8/ATF4/NDUFAB1/COX5A/NDUFA11	48	B5
hsa03010	Ribosome	48/916	158/8035	6.68e-11	1.84e-09	1.48e-09	RPLP0/RPS24/RPL7/RPL31/RPS4X/RPL24/RPS3/RPL4/RPS15A/RPS7/RPS3A/RPL19/RPL22/RPS6/RPL15/MRPL9/RPS2/UBA52/RPS13/RPS20/RPS8/RPL23A/RPL28/RPL35A/RPSA/RPL5/RPL36A/RPS11/MRPS5/RPL14/RPL27A/RPL3/RPL10A/RPLP2/MRPL14/RPL6/RPS10/RPS9/RPS15/RPL29/RPS23/RPL37/RPL13A/RPS16/RPS19/RSL24D1/RPL26/RPS17	48	B5
hsa05131	Shigellosis	47/916	242/8035	0.000150682	0.00175602	0.00140921	HIST1H3B/ACTG1/ACTN1/MDM2/H3F3A/VDAC1/TNFRSF1A/WASF2/PIK3R1/ACTB/ITGA5/RHOA/PIK3CD/ROCK1/CBX3/UBB/TP53/ARHGEF2/FOXO1/RAC1/UBE2D2/SKP1/TLN1/UBE2D3/ARPC5/UBE2V2/ACTN4/WIPI2/UBA52/MYL12B/DIAPH1/CALCOCO2/MAPK1/ELMO1/PIK3CA/PFN1/AKT3/ARPC3/ARF1/H3F3B/GABARAPL2/FNBP1/UBE2N/ARPC5L/RBX1/ARPC2/ATM	47	B5
hsa03013	RNA transport	45/916	180/8035	1.99e-07	4.63e-06	3.72e-06	TACC3/XPO1/SUMO2/UPF3B/CYFIP2/EIF3F/THOC7/UBE2I/SRRM1/PNN/RAN/EIF3H/EIF4EBP2/FXR1/SUMO1/TPR/EEF1A1/EIF3E/ACIN1/ALYREF/NUP160/THOC2/RBM8A/MAGOH/EIF3D/SAP18/DDX39B/POM121C/KPNB1/STRAP/EIF4G2/EIF2S3/EIF3A/UPF3A/RNPS1/NUP58/NUP50/EIF1AX/PABPC1/EIF3J/EIF4A3/SUMO3/EIF2S2/CLNS1A/UPF2	45	B5
hsa04218	Cellular senescence	44/916	156/8035	5.61e-09	1.42e-07	1.14e-07	E2F2/CDK1/CCNA2/FOXM1/CCNB2/CHEK1/CCND3/E2F1/CDK6/MDM2/CCNE2/CDK2/MYBL2/VDAC1/PIK3R1/CALM2/PTEN/ZFP36L2/SLC25A5/PIK3CD/PPP1CA/MRE11/TP53/CCNB1/FOXO1/GADD45A/SMAD2/RBBP4/MAPKAPK2/PPP3R1/CALM3/PPP1CB/VDAC2/RB1/VDAC3/MAPK1/PIK3CA/AKT3/ZFP36L1/PPP3CC/HLA-A/RHEB/PPP1CC/ATM	44	B5
hsa04810	Regulation of actin cytoskeleton	41/916	214/8035	0.000524102	0.00481221	0.0038618	DIAPH3/MYLK/ACTG1/ACTN1/IQGAP2/CFL1/WASF2/PIK3R1/ARHGEF7/ACTB/ITGA5/RHOA/PIK3CD/ROCK1/PPP1R12A/PPP1CA/CYFIP2/PAK2/RAC1/MYH9/ARHGEF6/TMSB4X/ARPC5/SSH2/ACTN4/PPP1CB/MYL12B/DIAPH1/MAPK1/PIK3CA/PFN1/ARPC3/MSN/NCKAP1L/CXCR4/BRK1/ARPC5L/ARPC2/IQGAP1/RDX/PPP1CC	41	B5
hsa05165	Human papillomavirus infection	41/916	330/8035	0.299898	0.698993	0.560943	CCNA2/CCND3/E2F1/CDK6/TCF7L2/MDM2/CCNE2/CDK2/TNFRSF1A/HDAC2/PIK3R1/PTEN/ITGA5/PIK3CD/PKM/TP53/CHD4/FOXO1/GNAS/PRKACB/CREB1/CSNK1A1/PPP2CA/ATP6V1D/RB1/MAPK1/PIK3CA/JAK1/CREBBP/DLG1/ATP6V1G1/AKT3/HDAC1/PPP2R1A/CTNNB1/CDKN1B/IRF1/RBPJ/HLA-A/RHEB/ATM	41	B5
hsa04144	Endocytosis	39/916	248/8035	0.0223701	0.10759	0.0863409	PSD3/MDM2/GRK2/RHOA/VPS26B/HSPA8/SMAD2/SNX2/CLTC/AP2M1/WASHC4/KIF5B/CAPZB/ARPC5/RAB11A/SNF8/CLTA/VPS35/SNX1/ACAP2/SMURF2/VPS4B/ARF5/AP2B1/ARPC3/AP2S1/VPS29/ARF1/CXCR4/SH3KBP1/SMAP1/ARPC5L/ARPC2/VPS28/RAB7A/HLA-A/EPS15/SH3GLB1/RAB8A	39	B5
hsa04151	PI3K-Akt signaling pathway	39/916	354/8035	0.617622	1	0.802501	CCND3/BRCA1/CDK6/MYB/MDM2/CCNE2/GNG11/PIK3AP1/CDK2/YWHAQ/PIK3R1/PTEN/ITGA5/PIK3CD/HSP90AA1/GNB1/PKN2/GNG5/TP53/YWHAE/RAC1/YWHAH/CREB1/GNB4/PPP2CA/RPS6/MAPK1/YWHAB/PIK3CA/JAK1/AKT3/PPP2R1A/GNB2/CDKN1B/INSR/YWHAZ/RHEB/ATF4/GNG7	39	B5
hsa05034	Alcoholism	38/916	187/8035	0.00024759	0.00267927	0.00215012	H2AFY/HIST1H3B/NPY/HIST1H2AJ/HIST1H2AL/H2AFV/GNG11/H3F3A/HDAC2/H2AFZ/CALM2/HIST1H2AH/H2AFX/HIST1H4E/HIST1H4C/GNB1/PPP1CA/GNG5/GNAI2/HIST1H2AG/GNAS/GNAI3/PRKACB/CREB1/GNB4/CALM3/HAT1/PPP1CB/HDAC7/MAPK1/H3F3B/HDAC1/HIST2H2AC/GNB2/H2AFJ/ATF4/GNG7/PPP1CC	38	B5
hsa05202	Transcriptional misregulation in cancer	37/916	192/8035	0.000861017	0.00724689	0.00581564	ERG/CCNA2/HIST1H3B/JUP/NSD2/MDM2/H3F3A/HDAC2/SMAD1/TCF3/ID2/LMO2/PBX3/HHEX/CDK9/FUS/CDKN2C/TAF15/TP53/EWSR1/FOXO1/GADD45A/AFF1/MAX/ETV6/RUNX1/KMT2A/JMJD1C/FLI1/DDX5/MEF2C/H3F3B/HDAC1/NCOR1/CDKN1B/KLF3/ATM	37	B5
hsa05169	Epstein-Barr virus infection	37/916	202/8035	0.00222636	0.0168647	0.0135339	E2F2/CCNA2/CCND3/E2F1/CDK6/MDM2/CCNE2/CDK2/HDAC2/PIK3R1/SEM1/PIK3CD/TP53/GADD45A/RAC1/SAP30/SNW1/BLNK/RB1/PIK3CA/JAK1/PSMC3/AKT3/HLA-DRB5/PSMD1/HDAC1/PSMC5/HLA-DRA/USP7/CDKN1B/PSMD2/PSMD8/HLA-DMA/RBPJ/HLA-A/PSMD4/VIM	37	B5
hsa05170	Human immunodeficiency virus 1 infection	37/916	212/8035	0.00516522	0.0347791	0.0279103	CDK1/CCNB2/CHEK1/WEE1/GNG11/CFL1/TNFRSF1A/PIK3R1/CALM2/PIK3CD/GNAQ/GNB1/GNG5/PAK2/CCNB1/GNAI2/RAC1/GNAI3/SKP1/PPP3R1/GNB4/ELOB/AP1S2/CALM3/ELOC/MAPK1/PIK3CA/AKT3/AP1B1/CXCR4/RBX1/PPP3CC/GNB2/HLA-A/GNG7/RNF7/ATM	37	B5
hsa05132	Salmonella infection	37/916	213/8035	0.0055879	0.0360241	0.0289094	LEF1/GAPDH/ACTG1/TCF7L2/TNFRSF1A/ACTB/RHOA/PIK3CD/HSP90AA1/CYFIP2/RAC1/DYNLL1/KPNA3/SKP1/RPS3/TXN/DYNC1H1/DYNC1LI2/ARPC5/MYL12B/MAPK1/ELMO1/PIK3CA/PFN1/AKT3/ARPC3/ABI1/KPNA4/ARF1/NCKAP1L/GSDMD/BRK1/CTNNB1/ARPC5L/ARPC2/GCC2/RAB7A	37	B5
hsa05163	Human cytomegalovirus infection	37/916	225/8035	0.0133666	0.0740557	0.0594298	E2F2/E2F1/CDK6/MDM2/GNG11/TNFRSF1A/PIK3R1/CALM2/RHOA/PIK3CD/ROCK1/GNAQ/GNB1/GNG5/TP53/GNAI2/RAC1/GNAS/GNAI3/PRKACB/PPP3R1/CREB1/GNB4/CALM3/RB1/MAPK1/PIK3CA/JAK1/AKT3/CXCR4/CTNNB1/PPP3CC/GNB2/HLA-A/RHEB/ATF4/GNG7	37	B5
hsa04120	Ubiquitin mediated proteolysis	36/916	140/8035	1.62e-06	2.59e-05	2.08e-05	UBE2C/BRCA1/CDC20/MDM2/SAE1/UBB/UBE2I/PIAS2/UBE2D2/SKP1/PIAS1/ELOB/UBE2S/UBR5/UBE2L3/UBE2D3/UBA2/UBE2E3/UBE2B/UBA52/SIAH1/ELOC/UBE2A/SMURF2/UBE2R2/TRIP12/ANAPC5/HUWE1/UBE2E1/UBE2N/ANAPC11/RBX1/UBE2K/UBE2J1/RNF7/UBE2G2	36	B5
hsa05225	Hepatocellular carcinoma	36/916	168/8035	0.00011849	0.00149594	0.00120049	E2F2/LEF1/E2F1/SMARCD2/ACTG1/CDK6/TCF7L2/SMARCA4/PIK3R1/ACTB/PTEN/PIK3CD/BRD7/TP53/GADD45A/PBRM1/SMAD2/ARID2/SMARCE1/CSNK1A1/PHF10/GSTO1/ARID1A/ACTL6A/SMARCA2/SMARCD1/ARID1B/RB1/MAPK1/PIK3CA/SMARCC2/AKT3/SMARCC1/GAB1/CTNNB1/SMARCB1	36	B5
hsa05206	MicroRNAs in cancer	36/916	310/8035	0.479753	0.908532	0.729098	E2F2/CDCA5/SOX4/E2F1/BRCA1/EZH2/STMN1/CDK6/MDM2/CCNE2/DNMT1/HNRNPK/HDAC2/PIK3R1/PTEN/ITGA5/MDM4/RHOA/PIK3CD/ROCK1/IRS2/ZEB2/TP53/UBE2I/DICER1/MAPK1/PIK3CA/CREBBP/CCNG1/FOXP1/HDAC1/DNMT3A/CDKN1B/RDX/VIM/ATM	36	B5
hsa04114	Oocyte meiosis	35/916	128/8035	4.7e-07	8.71e-06	6.99e-06	MAD2L1/CDK1/CCNB2/SGO1/CDC20/PTTG1/BUB1/CCNE2/CDK2/MAD2L2/YWHAQ/SMC1A/PLK1/CALM2/SMC3/FBXO5/PPP1CA/CCNB1/YWHAE/SKP1/PRKACB/YWHAH/PPP3R1/CALM3/PPP2CA/PPP1CB/MAPK1/YWHAB/ANAPC5/PPP2R1A/ANAPC11/RBX1/PPP3CC/YWHAZ/PPP1CC	35	B5
hsa05168	Herpes simplex virus 1 infection	35/916	491/8035	0.999563	1	0.802501	ZNF714/SRSF3/TNFRSF1A/PIK3R1/ZNF43/SRSF2/ITGA5/PIK3CD/PPP1CA/HCFC1/TP53/SRSF9/ALYREF/SRSF1/ZNF124/SRSF5/PPP1CB/SRSF6/ZNF431/ZNF430/PIK3CA/JAK1/SRSF4/AKT3/SRSF7/HLA-DRB5/POU2F1/ZNF37A/HLA-DRA/SRPK1/HLA-DMA/ZNF33A/HLA-A/RHEB/PPP1CC	35	B5
hsa05017	Spinocerebellar ataxia	34/916	133/8035	3.63e-06	5.23e-05	4.2e-05	PIK3R1/SEM1/PIK3CD/GNAQ/PSMA6/PSMA7/PUM2/PSMA1/PUM1/CIC/PSMA4/ATXN2/PSMB7/PSMA2/WIPI2/PSMB6/PIK3CA/NOP56/PSMB2/PSMC3/PSMA5/PSMB3/RB1CC1/AKT3/PSMB4/PSMD1/ATXN3/ATXN10/PSMC5/PSMB1/PSMD2/PSMD8/RBPJ/PSMD4	34	B5
hsa05167	Kaposi sarcoma-associated herpesvirus infection	34/916	189/8035	0.00442952	0.0311293	0.0249813	E2F2/E2F1/CDK6/GNG11/TNFRSF1A/PIK3R1/CALM2/PIK3CD/GNB1/UBB/GNG5/TP53/RAC1/MAPKAPK2/PPP3R1/CREB1/GNB4/CALM3/UBA52/HIF1A/PREX1/RB1/MAPK1/PIK3CA/JAK1/CREBBP/AKT3/ATG3/GABARAPL2/CTNNB1/PPP3CC/GNB2/HLA-A/GNG7	34	B5
hsa04723	Retrograde endocannabinoid signaling	31/916	148/8035	0.000522899	0.00481221	0.0038618	GNG11/GNAQ/GNB1/GNG5/GNAI2/NDUFA4/GNAI3/PRKACB/GNB4/NDUFB1/NDUFA5/NDUFS3/NDUFB4/NDUFB10/MAPK1/NDUFB3/NDUFS6/NDUFB11/NDUFA13/NDUFV2/NDUFB7/NDUFA2/NDUFB8/GNB2/NDUFC2/NDUFA7/NDUFA6/NDUFS8/NDUFAB1/GNG7/NDUFA11	31	B5
hsa04022	cGMP-PKG signaling pathway	30/916	167/8035	0.00738546	0.0456693	0.0366496	MYLK/VDAC1/GTF2I/CALM2/RHOA/SLC25A5/ATP2B4/ROCK1/IRS2/PPP1R12A/GNAQ/ATP1B3/PPP1CA/GNAI2/MEF2D/GNAI3/PPP3R1/CREB1/CALM3/PPP1CB/VDAC2/VDAC3/MAPK1/MEF2C/MEF2A/AKT3/PPP3CC/INSR/ATF4/PPP1CC	30	B5
hsa05130	Pathogenic Escherichia coli infection	30/916	192/8035	0.0444984	0.19828	0.15912	GAPDH/ACTG1/TUBB/TNFRSF1A/WASF2/ACTB/RHOA/MYO5C/ROCK1/CYFIP2/PAK2/ARHGEF2/RAC1/NCL/MYH9/FYN/TUBA1B/TUBA1A/RPS3/ARPC5/MAPK1/ARPC3/ABI1/ARF1/NCKAP1L/NCK2/BRK1/TUBB4B/ARPC5L/ARPC2	30	B5
hsa04510	Focal adhesion	29/916	201/8035	0.107029	0.360331	0.289166	MYLK/CCND3/ACTG1/ACTN1/PIK3R1/ACTB/PTEN/ITGA5/RHOA/PIK3CD/ROCK1/PPP1R12A/PPP1CA/PAK2/RAC1/RAP1B/FYN/TLN1/ACTN4/PPP1CB/MYL12B/DIAPH1/MAPK1/PARVG/PIK3CA/AKT3/CTNNB1/PPP1CC/ARHGAP5	29	B5
hsa03015	mRNA surveillance pathway	28/916	91/8035	4.88e-07	8.71e-06	6.99e-06	MSI2/UPF3B/PPP1CA/SRRM1/PNN/CPSF6/ACIN1/ALYREF/PPP2CA/RBM8A/DAZAP1/PABPN1/MAGOH/SAP18/DDX39B/PPP1CB/NUDT21/CPSF2/UPF3A/RNPS1/WDR82/HBS1L/PPP2R1A/PABPC1/EIF4A3/PAPOLA/UPF2/PPP1CC	28	B5
hsa04611	Platelet activation	28/916	124/8035	0.000266056	0.00277982	0.00223081	MYLK/ACTG1/APBB1IP/PIK3R1/ACTB/RHOA/PIK3CD/ROCK1/PPP1R12A/GNAQ/PPP1CA/RASGRP2/GNAI2/RAP1B/GNAS/FYN/GNAI3/PRKACB/TLN1/PPP1CB/MYL12B/MAPK1/PIK3CA/VAMP8/AKT3/FERMT3/P2RX1/PPP1CC	28	B5
hsa04068	FoxO signaling pathway	27/916	131/8035	0.00150492	0.012186	0.00977932	CCNB2/SOD2/MDM2/CDK2/S1PR4/RAG1/PIK3R1/PLK1/PTEN/RAG2/PIK3CD/IRS2/CCNB1/FOXO1/GADD45A/MAPK1/PIK3CA/CREBBP/AKT3/CCNG2/GABARAPL2/CDKN2D/USP7/CDKN1B/INSR/PRMT1/ATM	27	B5
hsa05205	Proteoglycans in cancer	27/916	205/8035	0.238605	0.619468	0.497124	ACTG1/MDM2/PIK3R1/ACTB/ITGA5/RHOA/PIK3CD/ROCK1/PPP1R12A/PPP1CA/TP53/RAC1/SMAD2/PRKACB/RPS6/PPP1CB/HIF1A/MAPK1/PIK3CA/DDX5/AKT3/MSN/GAB1/CTNNB1/IQGAP1/RDX/PPP1CC	27	B5
hsa05164	Influenza A	26/916	170/8035	0.071873	0.265579	0.213128	CCND3/ACTG1/CDK6/XPO1/VDAC1/TNFRSF1A/PIK3R1/ACTB/SLC25A5/PIK3CD/HNRNPUL1/PABPN1/KPNA2/RAB11A/CALCOCO2/MAPK1/PIK3CA/JAK1/CREBBP/AKT3/HLA-DRB5/ADAR/HLA-DRA/FDPS/HLA-DMA/DNAJB1	26	B5
hsa03050	Proteasome	25/916	46/8035	1.28e-12	4.3e-11	3.45e-11	PSMB8/SEM1/PSMA6/PSMA7/PSMB9/PSME1/PSMA1/PSMA4/PSME4/POMP/PSMB7/PSMA2/PSMB6/PSMB2/PSMC3/PSMA5/PSMB3/PSMB4/PSMD1/PSMC5/PSMB1/PSMD2/PSMD8/PSMD4/PSMB10	25	B5
hsa03018	RNA degradation	25/916	79/8035	1.11e-06	1.88e-05	1.5e-05	DCP2/PFKL/ZCCHC7/EXOSC9/LSM7/CNOT6L/PAN3/CNOT8/LSM3/ENO1/CNOT2/LSM2/LSM4/EXOSC6/LSM5/CNOT7/CNOT1/PABPC1/HSPD1/DDX6/XRN2/LSM6/LSM8/BTG3/BTG2	25	B5
hsa05160	Hepatitis C	25/916	155/8035	0.0455242	0.198625	0.159397	E2F2/E2F1/CDK6/CDK2/TNFRSF1A/CD81/YWHAQ/PIK3R1/PIK3CD/SCARB1/TP53/YWHAE/EIF3E/YWHAH/PIAS1/PPP2CA/RB1/MAPK1/YWHAB/PIK3CA/JAK1/AKT3/PPP2R1A/CTNNB1/YWHAZ	25	B5
hsa04530	Tight junction	25/916	161/8035	0.0662458	0.250906	0.201352	ACTG1/ACTN1/PCNA/MYL6B/ACTB/RHOA/ROCK1/YBX3/ARHGEF2/RAC1/MYH9/TUBA1B/ACTR2/PRKACB/TUBA1A/RUNX1/PPP2CA/ACTN4/MYL6/MYL12B/DLG1/MSN/PPP2R1A/RDX/RAB8A	25	B5
hsa04024	cAMP signaling pathway	25/916	216/8035	0.500157	0.933362	0.749024	NPY/PIK3R1/CALM2/RHOA/ATP2B4/PIK3CD/ROCK1/PPP1R12A/ATP1B3/PPP1CA/GNAI2/RAC1/RAP1B/GNAS/GNAI3/PRKACB/CREB1/CALM3/PPP1CB/MAPK1/PIK3CA/CREBBP/AKT3/PPP1CC/PDE4B	25	B5
hsa04014	Ras signaling pathway	25/916	232/8035	0.650547	1	0.802501	ETS2/GNG11/PIK3R1/CALM2/RHOA/PIK3CD/GAB2/GNB1/RASGRP2/GNG5/PAK2/RALBP1/RAC1/RAP1B/PRKACB/GNB4/CALM3/SHOC2/MAPK1/PIK3CA/AKT3/GAB1/GNB2/INSR/GNG7	25	B5
hsa04728	Dopaminergic synapse	24/916	132/8035	0.0134425	0.0740557	0.0594298	GNG11/CALM2/GNAQ/GNB1/PPP1CA/COMT/GNG5/GNAI2/GNAS/GNAI3/PRKACB/CREB1/GNB4/CALM3/KIF5B/PPP2CA/PPP1CB/AKT3/PPP2R1A/PPP3CC/GNB2/ATF4/GNG7/PPP1CC	24	B5
hsa05322	Systemic lupus erythematosus	24/916	136/8035	0.0190021	0.0975872	0.0783138	H2AFY/HIST1H3B/HIST1H2AJ/ACTN1/HIST1H2AL/H2AFV/H3F3A/H2AFZ/SNRPD1/HIST1H2AH/H2AFX/HIST1H4E/HIST1H4C/HIST1H2AG/SNRPB/SSB/ACTN4/SNRPD3/HLA-DRB5/H3F3B/HLA-DRA/HIST2H2AC/HLA-DMA/H2AFJ	24	B5
hsa04010	MAPK signaling pathway	24/916	294/8035	0.973752	1	0.802501	STMN1/TNFRSF1A/MAP3K20/MAP3K3/RASGRP2/TP53/PAK2/HSPA8/GADD45A/RAC1/RAP1B/MAX/MAP4K4/MAPKAPK2/PRKACB/PPP3R1/MAPK1/MEF2C/AKT3/PPP3CC/TAOK3/INSR/MKNK2/ATF4	24	B5
hsa05215	Prostate cancer	23/916	97/8035	0.000439836	0.00429904	0.00344999	ERG/E2F2/LEF1/E2F1/TCF7L2/MDM2/CCNE2/CDK2/PIK3R1/PTEN/PIK3CD/HSP90AA1/TP53/FOXO1/CREB1/RB1/MAPK1/PIK3CA/CREBBP/AKT3/CTNNB1/CDKN1B/ATF4	23	B5
hsa04919	Thyroid hormone signaling pathway	23/916	121/8035	0.00909484	0.054034	0.0433624	ACTG1/MDM2/HDAC2/PIK3R1/ACTB/PIK3CD/MED30/ATP1B3/PFKL/TP53/FOXO1/MED13L/PRKACB/MED4/HIF1A/MAPK1/PIK3CA/CREBBP/AKT3/HDAC1/CTNNB1/NCOR1/RHEB	23	B5
hsa04934	Cushing syndrome	23/916	155/8035	0.111303	0.370601	0.297408	E2F2/LEF1/E2F1/CDK6/TCF7L2/CCNE2/CDK2/CDKN2C/ASH2L/GNAQ/SCARB1/GNAI2/RAP1B/GNAS/GNAI3/PRKACB/CREB1/KMT2A/RB1/MAPK1/CTNNB1/CDKN1B/ATF4	23	B5
hsa04390	Hippo signaling pathway	23/916	157/8035	0.12334	0.406217	0.32599	BIRC5/LEF1/CCND3/ACTG1/TCF7L2/SMAD1/YWHAQ/ID2/ACTB/PPP1CA/YWHAE/SMAD2/YWHAH/PPP2CA/PPP1CB/MOB1A/YWHAB/DLG1/PPP2R1A/CTNNB1/LIMD1/YWHAZ/PPP1CC	23	B5
hsa04217	Necroptosis	23/916	159/8035	0.136138	0.431185	0.346027	H2AFY/HMGB1/HIST1H2AJ/HIST1H2AL/H2AFV/PPIA/VDAC1/TNFRSF1A/H2AFZ/HIST1H2AH/H2AFX/SLC25A5/DNM1L/HSP90AA1/PARP1/HIST1H2AG/GLUL/VDAC2/VDAC3/VPS4B/JAK1/HIST2H2AC/H2AFJ	23	B5
hsa05161	Hepatitis B	23/916	162/8035	0.156743	0.452315	0.362983	E2F2/BIRC5/CCNA2/E2F1/CCNE2/CDK2/PCNA/YWHAQ/PIK3R1/PIK3CD/TP53/CREB1/RB1/VDAC3/MAPK1/YWHAB/PIK3CA/JAK1/DDX3X/CREBBP/AKT3/YWHAZ/ATF4	23	B5
hsa04062	Chemokine signaling pathway	23/916	189/8035	0.402133	0.815115	0.654131	GNG11/GRK2/PIK3R1/RHOA/PIK3CD/ROCK1/GNB1/RASGRP2/GNG5/GNAI2/RAC1/RAP1B/GNAI3/PRKACB/GNB4/PREX1/MAPK1/ELMO1/PIK3CA/AKT3/CXCR4/GNB2/GNG7	23	B5
hsa03030	DNA replication	22/916	36/8035	1.12e-12	4.23e-11	3.39e-11	MCM4/MCM2/POLD3/RFC5/MCM3/POLA2/PCNA/MCM7/MCM6/RNASEH2B/RFC3/RFC4/FEN1/RPA1/LIG1/SSBP1/POLE3/MCM5/RFC1/RNASEH2C/POLD2/RPA3	22	B5
hsa04115	p53 signaling pathway	22/916	73/8035	1.18e-05	0.000163063	0.000130858	RRM2/GTSE1/CDK1/CCNB2/CHEK1/CCND3/CDK6/MDM2/CCNE2/CDK2/PTEN/MDM4/TP53/CCNB1/GADD45A/PMAIP1/SIVA1/SESN3/SIAH1/CCNG1/CCNG2/ATM	22	B5
hsa04922	Glucagon signaling pathway	22/916	106/8035	0.00362425	0.0261463	0.0209825	LDHB/CALM2/PKM/GNAQ/PFKL/CPT1A/FOXO1/GNAS/PRKACB/PPP3R1/CREB1/CALM3/PPP4C/LDHA/CREBBP/AKT3/PPP4R3B/PDHB/PPP3CC/PRMT1/PGAM1/ATF4	22	B5
hsa04371	Apelin signaling pathway	22/916	137/8035	0.0602972	0.23539	0.188901	MYLK/GNG11/CALM2/GNAQ/GNB1/GNG5/GNAI2/SMAD2/MEF2D/GNAI3/PRKACB/GNB4/CALM3/RPS6/MAPK1/MEF2C/MEF2A/AKT3/GABARAPL2/TFAM/GNB2/GNG7	22	B5
hsa05418	Fluid shear stress and atherosclerosis	22/916	139/8035	0.0686276	0.256718	0.206016	ACTG1/SUMO2/TNFRSF1A/PIK3R1/ACTB/CALM2/RHOA/PIK3CD/HSP90AA1/TP53/ARHGEF2/RAC1/SUMO1/CALM3/TXN/GSTO1/PIK3CA/MEF2C/MEF2A/AKT3/CTNNB1/SUMO3	22	B5
hsa04921	Oxytocin signaling pathway	22/916	154/8035	0.156101	0.452315	0.362983	MYLK/ACTG1/MYL6B/ACTB/CALM2/RHOA/ROCK1/PPP1R12A/GNAQ/PPP1CA/GNAI2/GNAS/GNAI3/PRKACB/PPP3R1/CALM3/PPP1CB/MYL6/MAPK1/MEF2C/PPP3CC/PPP1CC	22	B5
hsa04015	Rap1 signaling pathway	22/916	210/8035	0.69755	1	0.802501	ACTG1/APBB1IP/PIK3R1/ACTB/CALM2/RHOA/PIK3CD/GNAQ/RASGRP2/GNAI2/RAC1/RAP1B/GNAS/GNAI3/CALM3/TLN1/MAPK1/PIK3CA/PFN1/AKT3/CTNNB1/INSR	22	B5
hsa04914	Progesterone-mediated oocyte maturation	21/916	99/8035	0.00337372	0.0249326	0.0200085	MAD2L1/CDK1/CCNA2/CCNB2/BUB1/CDK2/MAD2L2/PIK3R1/PLK1/PIK3CD/HSP90AA1/CCNB1/GNAI2/GNAI3/PRKACB/KIF22/MAPK1/PIK3CA/AKT3/ANAPC5/ANAPC11	21	B5
hsa04066	HIF-1 signaling pathway	21/916	109/8035	0.0106109	0.0618291	0.0496179	GAPDH/LDHB/PIK3R1/PIK3CD/PFKL/ELOB/ENO1/PGK1/RPS6/HIF1A/ELOC/MAPK1/PIK3CA/LDHA/CREBBP/AKT3/RBX1/PDHB/CDKN1B/INSR/MKNK2	21	B5
hsa04140	Autophagy - animal	21/916	137/8035	0.0962274	0.327606	0.262904	HMGB1/PIK3R1/PTEN/PIK3CD/IRS2/PRKACB/PPP2CA/WIPI2/HIF1A/MAPK1/PIK3CA/RB1CC1/VAMP8/AKT3/ATG3/GABARAPL2/IGBP1/RAB7A/RHEB/SH3GLB1/RAB8A	21	B5
hsa04310	Wnt signaling pathway	21/916	160/8035	0.278023	0.663316	0.532312	CTBP2/LEF1/CCND3/TCF7L2/RHOA/TP53/RAC1/CACYBP/SKP1/PRKACB/PPP3R1/CSNK1A1/SIAH1/CTBP1/TBL1XR1/CREBBP/CHD8/CTNNB1/RBX1/PPP3CC/CSNK2B	21	B5
hsa04360	Axon guidance	21/916	181/8035	0.500991	0.933362	0.749024	DPYSL2/CFL1/PIK3R1/PLXNB2/RHOA/PIK3CD/ROCK1/PAK2/GNAI2/RAC1/FYN/GNAI3/PPP3R1/SSH2/MYL12B/MAPK1/PIK3CA/NCK2/CXCR4/PPP3CC/ABLIM1	21	B5
hsa05100	Bacterial invasion of epithelial cells	20/916	73/8035	0.000130268	0.00157885	0.00126703	ACTG1/MAD2L2/WASF2/PIK3R1/ACTB/ITGA5/RHOA/PIK3CD/RAC1/CD2AP/CLTC/ARPC5/CLTA/ELMO1/PIK3CA/ARPC3/GAB1/CTNNB1/ARPC5L/ARPC2	20	B5
hsa05220	Chronic myeloid leukemia	20/916	76/8035	0.000236821	0.00265766	0.00213277	CTBP2/E2F2/E2F1/BCR/CDK6/MDM2/HDAC2/PIK3R1/PIK3CD/GAB2/TP53/GADD45A/RUNX1/RB1/MAPK1/CTBP1/PIK3CA/AKT3/HDAC1/CDKN1B	20	B5
hsa04260	Cardiac muscle contraction	20/916	87/8035	0.00152828	0.012186	0.00977932	COX6C/ATP1B3/COX6A1/UQCR10/COX8A/TPM3/COX7A2L/UQCRFS1/UQCRC2/UQCRC1/COX4I1/COX7B/UQCRH/UQCRB/COX5B/COX7A2/COX6B1/TPM4/UQCRQ/COX5A	20	B5
hsa01200	Carbon metabolism	20/916	117/8035	0.0409937	0.188198	0.151029	GAPDH/ESD/TKT/IDH2/PKM/PFKL/ADH5/PHGDH/HADHA/ENO1/PGK1/MDH1/TALDO1/SDHA/ECHS1/PDHB/SUCLG1/PGAM1/ACSS1/TPI1	20	B5
hsa04071	Sphingolipid signaling pathway	20/916	119/8035	0.0477876	0.203939	0.163661	S1PR4/TNFRSF1A/CERS6/PIK3R1/PTEN/RHOA/PIK3CD/ROCK1/GAB2/GNAQ/TP53/GNAI2/RAC1/FYN/GNAI3/PPP2CA/MAPK1/PIK3CA/AKT3/PPP2R1A	20	B5
hsa04210	Apoptosis	20/916	136/8035	0.139274	0.43505	0.349128	BIRC5/LMNB1/ACTG1/LMNB2/TNFRSF1A/CASP2/PIK3R1/ACTB/PIK3CD/PARP1/TP53/GADD45A/TUBA1B/TUBA1A/PMAIP1/MAPK1/PIK3CA/AKT3/ATF4/ATM	20	B5
hsa04910	Insulin signaling pathway	20/916	137/8035	0.146632	0.440851	0.353784	SOCS2/PIK3R1/CALM2/PIK3CD/IRS2/PPP1CA/FOXO1/PRKACB/CALM3/PRKAR1A/RPS6/PPP1CB/MAPK1/PIK3CA/AKT3/INSR/FLOT1/RHEB/MKNK2/PPP1CC	20	B5
hsa04261	Adrenergic signaling in cardiomyocytes	20/916	149/8035	0.250617	0.621493	0.498749	CALM2/ATP2B4/GNAQ/ATP1B3/PPP1CA/GNAI2/GNAS/GNAI3/PRKACB/CREB1/TPM3/CALM3/PPP2CA/PPP1CB/MAPK1/AKT3/PPP2R1A/TPM4/ATF4/PPP1CC	20	B5
hsa05226	Gastric cancer	20/916	149/8035	0.250617	0.621493	0.498749	E2F2/LEF1/JUP/E2F1/TCF7L2/CCNE2/CDK2/PIK3R1/PIK3CD/TP53/GADD45A/SMAD2/CSNK1A1/RB1/MAPK1/PIK3CA/AKT3/GAB1/CTNNB1/CDKN1B	20	B5
hsa04670	Leukocyte transendothelial migration	19/916	113/8035	0.0525375	0.218067	0.174999	CD99/ACTG1/ACTN1/PIK3R1/ACTB/RHOA/PIK3CD/ROCK1/GNAI2/RAC1/RAP1B/GNAI3/ACTN4/MYL12B/PIK3CA/MSN/CXCR4/CTNNB1/ARHGAP5	19	B5
hsa04724	Glutamatergic synapse	19/916	114/8035	0.0566122	0.226659	0.181894	GNG11/SHANK3/GRK2/GNAQ/GNB1/GNG5/GNAI2/GNAS/GNAI3/PRKACB/PPP3R1/GNB4/GLUL/SLC38A1/SLC38A2/MAPK1/PPP3CC/GNB2/GNG7	19	B5
hsa04722	Neurotrophin signaling pathway	19/916	119/8035	0.0803006	0.285813	0.229365	ARHGDIB/PIK3R1/CALM2/RHOA/PIK3CD/MAP3K3/TP53/YWHAE/RAC1/RAP1B/MAPKAPK2/CALM3/MAPK1/PIK3CA/AKT3/GAB1/MAGED1/ARHGDIA/ATF4	19	B5
hsa05222	Small cell lung cancer	18/916	92/8035	0.0147667	0.0798986	0.0641188	E2F2/E2F1/CDK6/CCNE2/CDK2/FHIT/CKS1B/CKS2/PIK3R1/PTEN/PIK3CD/TP53/GADD45A/MAX/RB1/PIK3CA/AKT3/CDKN1B	18	B5
hsa04725	Cholinergic synapse	18/916	113/8035	0.0884831	0.304663	0.244493	GNG11/PIK3R1/PIK3CD/GNAQ/GNB1/GNG5/GNAI2/FYN/GNAI3/PRKACB/CREB1/GNB4/MAPK1/PIK3CA/AKT3/GNB2/ATF4/GNG7	18	B5
hsa04926	Relaxin signaling pathway	18/916	129/8035	0.213496	0.577583	0.463511	GNG11/PIK3R1/PIK3CD/GNB1/GNG5/GNAI2/SMAD2/GNAS/GNAI3/PRKACB/CREB1/GNB4/MAPK1/PIK3CA/AKT3/GNB2/ATF4/GNG7	18	B5
hsa05224	Breast cancer	18/916	147/8035	0.410799	0.815837	0.65471	E2F2/LEF1/E2F1/BRCA1/CDK6/TCF7L2/PIK3R1/PTEN/PIK3CD/TP53/GADD45A/BRCA2/CSNK1A1/RB1/MAPK1/PIK3CA/AKT3/CTNNB1	18	B5
hsa04145	Phagosome	18/916	152/8035	0.469601	0.904068	0.725516	ACTG1/TUBB/ACTB/ITGA5/SCARB1/RAC1/TUBA1B/TUBA1A/DYNC1H1/DYNC1LI2/ATP6V1D/ATP6V1G1/HLA-DRB5/TUBB4B/HLA-DRA/RAB7A/HLA-DMA/HLA-A	18	B5
hsa04150	mTOR signaling pathway	18/916	155/8035	0.504635	0.933362	0.749024	RNF152/TNFRSF1A/PIK3R1/PTEN/RHOA/PIK3CD/TBC1D7/RPS6/ATP6V1D/MAPK1/PIK3CA/ATP6V1G1/AKT3/RICTOR/INSR/FNIP1/RHEB/LPIN1	18	B5
hsa04141	Protein processing in endoplasmic reticulum	18/916	167/8035	0.637521	1	0.802501	HSP90AA1/HSPA8/UBE2D2/SKP1/MARCH6/SEC63/UBE2D3/ERO1B/STT3B/MAN1A2/DNAJA1/ATXN3/RBX1/UBE2J1/ATF4/UBE2G2/EDEM1/DNAJB1	18	B5
hsa04520	Adherens junction	17/916	71/8035	0.00211498	0.0164318	0.0131865	LEF1/ACTG1/TCF7L2/ACTN1/WASF2/ACTB/RHOA/RAC1/FYN/ACP1/ACTN4/MAPK1/CREBBP/CTNNB1/IQGAP1/INSR/CSNK2B	17	B5
hsa05212	Pancreatic cancer	17/916	76/8035	0.00452043	0.0311293	0.0249813	E2F2/E2F1/CDK6/PIK3R1/PIK3CD/TP53/RALBP1/GADD45A/RAC1/SMAD2/BRCA2/ARHGEF6/RB1/MAPK1/PIK3CA/JAK1/AKT3	17	B5
hsa05210	Colorectal cancer	17/916	86/8035	0.0158842	0.0844372	0.0677609	BIRC5/LEF1/TCF7L2/PIK3R1/RHOA/PIK3CD/MSH6/APPL1/TP53/GADD45A/RAC1/SMAD2/PMAIP1/MAPK1/PIK3CA/AKT3/CTNNB1	17	B5
hsa05135	Yersinia infection	17/916	130/8035	0.310573	0.714575	0.573447	ACTG1/WASF2/PIK3R1/ARHGEF7/ACTB/ITGA5/RHOA/PIK3CD/ROCK1/GNAQ/PKN2/RAC1/ACTR2/MAPK1/ELMO1/PIK3CA/AKT3	17	B5
hsa04270	Vascular smooth muscle contraction	17/916	135/8035	0.369276	0.790228	0.634159	MYLK/PRKCH/MYL6B/CALM2/RHOA/ROCK1/PPP1R12A/GNAQ/PPP1CA/MYH9/GNAS/PRKACB/CALM3/PPP1CB/MYL6/MAPK1/PPP1CC	17	B5
hsa04915	Estrogen signaling pathway	17/916	138/8035	0.405356	0.815115	0.654131	PIK3R1/CALM2/PIK3CD/HSP90AA1/GNAQ/HSPA8/GNAI2/GNAS/FKBP5/GNAI3/PRKACB/CREB1/CALM3/MAPK1/PIK3CA/AKT3/ATF4	17	B5
hsa05162	Measles	17/916	138/8035	0.405356	0.815115	0.654131	CCND3/CDK6/CCNE2/CDK2/PIK3R1/PIK3CD/TP53/HSPA8/EIF3H/RACK1/PIK3CA/JAK1/AKT3/MSN/ADAR/CDKN1B/CSNK2B	17	B5
hsa04550	Signaling pathways regulating pluripotency of stem cells	17/916	143/8035	0.465913	0.904068	0.725516	SMAD1/TCF3/PIK3R1/ID2/ID3/PIK3CD/SMAD2/KAT6A/REST/RIF1/JARID2/MAPK1/PIK3CA/JAK1/AKT3/CTNNB1/SKIL	17	B5
hsa04621	NOD-like receptor signaling pathway	17/916	181/8035	0.835909	1	0.802501	GBP4/VDAC1/RHOA/DNM1L/HSP90AA1/PKN2/YWHAE/IFI16/TXN/VDAC2/VDAC3/MAPK1/JAK1/SUGT1/ERBIN/GSDMD/GABARAPL2	17	B5
hsa01524	Platinum drug resistance	16/916	73/8035	0.00710591	0.0448561	0.035997	BIRC5/TOP2A/TOP2B/BRCA1/MDM2/PIK3R1/POLH/PIK3CD/MSH6/TP53/PMAIP1/GSTO1/MAPK1/PIK3CA/AKT3/ATM	16	B5
hsa04211	Longevity regulating pathway	16/916	89/8035	0.0424902	0.192157	0.154206	SOD2/PIK3R1/PIK3CD/IRS2/APPL1/TP53/FOXO1/PRKACB/CREB1/SESN3/PIK3CA/RB1CC1/AKT3/INSR/RHEB/ATF4	16	B5
hsa04152	AMPK signaling pathway	16/916	120/8035	0.290271	0.687126	0.55142	CCNA2/PIK3R1/PIK3CD/IRS2/PFKL/CPT1A/FOXO1/ELAVL1/CREB1/PPP2CA/PIK3CA/AKT3/PPP2R1A/INSR/RHEB/RAB8A	16	B5
hsa00230	Purine metabolism	16/916	130/8035	0.411957	0.815837	0.65471	RRM2/ADA/DCK/RRM1/GMPS/FHIT/HPRT1/NT5C2/PKM/AK3/NUDT5/PAICS/IMPDH2/GUK1/ENTPD4/PDE4B	16	B5
hsa05152	Tuberculosis	16/916	180/8035	0.886102	1	0.802501	TNFRSF1A/CALM2/RHOA/PPP3R1/CREB1/CALM3/MAPK1/JAK1/CREBBP/AKT3/HLA-DRB5/HLA-DRA/PPP3CC/HSPD1/RAB7A/HLA-DMA	16	B5
hsa04020	Calcium signaling pathway	16/916	196/8035	0.945815	1	0.802501	MYLK/VDAC1/CALM2/SLC25A5/ATP2B4/GNAQ/GNAS/PRKACB/PPP3R1/CALM3/ORAI3/VDAC2/VDAC3/CXCR4/PPP3CC/P2RX1	16	B5
hsa05230	Central carbon metabolism in cancer	15/916	70/8035	0.0110972	0.0634424	0.0509126	LDHB/PIK3R1/PTEN/IDH2/PIK3CD/PKM/PFKL/TP53/HIF1A/MAPK1/PIK3CA/LDHA/AKT3/PDHB/PGAM1	15	B5
hsa05214	Glioma	15/916	75/8035	0.020492	0.101788	0.081685	E2F2/E2F1/CDK6/MDM2/PIK3R1/CALM2/PTEN/PIK3CD/TP53/GADD45A/CALM3/RB1/MAPK1/PIK3CA/AKT3	15	B5
hsa04713	Circadian entrainment	15/916	97/8035	0.135478	0.431185	0.346027	GNG11/CALM2/GNAQ/GNB1/GNG5/GNAI2/GNAS/GNAI3/PRKACB/CREB1/GNB4/CALM3/MAPK1/GNB2/GNG7	15	B5
hsa01522	Endocrine resistance	15/916	98/8035	0.144122	0.440851	0.353784	E2F2/E2F1/MDM2/PIK3R1/PIK3CD/CDKN2C/TP53/GNAS/PRKACB/RB1/MAPK1/PIK3CA/AKT3/NCOR1/CDKN1B	15	B5
hsa04931	Insulin resistance	15/916	108/8035	0.245654	0.620277	0.497773	MLXIP/TNFRSF1A/PIK3R1/PTEN/PIK3CD/IRS2/PPP1CA/CPT1A/FOXO1/CREB1/PPP1CB/PIK3CA/AKT3/INSR/PPP1CC	15	B5
hsa04935	Growth hormone synthesis, secretion and action	15/916	119/8035	0.380243	0.800095	0.642078	SOCS2/PIK3R1/PIK3CD/IRS2/GNAQ/GNAI2/GNAS/GNAI3/PRKACB/CREB1/MAPK1/PIK3CA/CREBBP/AKT3/ATF4	15	B5
hsa00270	Cysteine and methionine metabolism	14/916	49/8035	0.000826609	0.00715607	0.00574276	SMS/LDHB/DNMT1/TST/APIP/PHGDH/MAT2A/MDH1/AHCYL1/AMD1/MPST/LDHA/DNMT3A/ADI1	14	B5
hsa04213	Longevity regulating pathway - multiple species	14/916	62/8035	0.00873481	0.052933	0.0424788	SOD2/HDAC2/PIK3R1/PIK3CD/IRS2/HSPA8/FOXO1/EIF4EBP2/PRKACB/PIK3CA/AKT3/HDAC1/SOD1/INSR	14	B5
hsa05211	Renal cell carcinoma	14/916	69/8035	0.0219506	0.107274	0.0860879	PIK3R1/PIK3CD/PAK2/RAC1/RAP1B/ELOB/HIF1A/ELOC/MAPK1/PIK3CA/CREBBP/AKT3/GAB1/RBX1	14	B5
hsa04666	Fc gamma R-mediated phagocytosis	14/916	93/8035	0.169294	0.483924	0.38835	CFL1/WASF2/PIK3R1/PIK3CD/GAB2/RAC1/ARPC5/MAPK1/INPP5D/PIK3CA/AKT3/ARPC3/ARPC5L/ARPC2	14	B5
hsa04350	TGF-beta signaling pathway	14/916	94/8035	0.179431	0.508109	0.407758	SMAD1/ID2/ID3/RHOA/TFDP1/ROCK1/SMAD2/SKP1/PPP2CA/MAPK1/SMURF2/CREBBP/PPP2R1A/RBX1	14	B5
hsa04928	Parathyroid hormone synthesis, secretion and action	14/916	106/8035	0.320404	0.714575	0.573447	RHOA/GNAQ/NACA/GNAI2/MEF2D/GNAS/GNAI3/PRKACB/CREB1/MAPK1/MEF2C/MEF2A/ATF4/PDE4B	14	B5
hsa04380	Osteoclast differentiation	14/916	128/8035	0.607844	1	0.802501	TNFRSF1A/PIK3R1/PIK3CD/GAB2/RAC1/FYN/PPP3R1/CREB1/BLNK/MAPK1/PIK3CA/JAK1/AKT3/PPP3CC	14	B5
hsa04072	Phospholipase D signaling pathway	14/916	148/8035	0.808832	1	0.802501	PIK3R1/RHOA/PIK3CD/GAB2/DGKZ/GNAS/FYN/MAPK1/PIK3CA/AKT3/ARF1/GAB1/INSR/RHEB	14	B5
hsa03440	Homologous recombination	13/916	41/8035	0.000418026	0.00422206	0.00338821	BRCA1/POLD3/BARD1/TOPBP1/SEM1/RPA1/MRE11/SSBP1/BRCA2/RBBP8/POLD2/RPA3/ATM	13	B5
hsa00310	Lysine degradation	13/916	61/8035	0.0181706	0.0949257	0.076178	EZH2/NSD2/HADH/KMT5A/KMT2E/HADHA/KMT2A/SETD2/ASH1L/ECHS1/PRDM2/KMT2C/NSD3	13	B5
hsa04720	Long-term potentiation	13/916	67/8035	0.0371885	0.173356	0.139118	CALM2/GNAQ/PPP1CA/RAP1B/PRKACB/PPP3R1/CALM3/PPP1CB/MAPK1/CREBBP/PPP3CC/ATF4/PPP1CC	13	B5
hsa05031	Amphetamine addiction	13/916	69/8035	0.0458869	0.198625	0.159397	HDAC2/CALM2/PPP1CA/GNAS/PRKACB/PPP3R1/CREB1/CALM3/PPP1CB/HDAC1/PPP3CC/ATF4/PPP1CC	13	B5
hsa05218	Melanoma	13/916	72/8035	0.0614329	0.235622	0.189087	E2F2/E2F1/CDK6/MDM2/PIK3R1/PTEN/PIK3CD/TP53/GADD45A/RB1/MAPK1/PIK3CA/AKT3	13	B5
hsa01230	Biosynthesis of amino acids	13/916	74/8035	0.0735504	0.267318	0.214523	GAPDH/TKT/IDH2/PKM/PFKL/PHGDH/GLUL/ENO1/PGK1/MAT2A/TALDO1/PGAM1/TPI1	13	B5
hsa04662	B cell receptor signaling pathway	13/916	82/8035	0.136613	0.431185	0.346027	PIK3AP1/CD81/PIK3R1/PIK3CD/CD79B/RAC1/PPP3R1/BLNK/MAPK1/INPP5D/PIK3CA/AKT3/PPP3CC	13	B5
hsa04727	GABAergic synapse	13/916	89/8035	0.210077	0.573453	0.460196	GNG11/GNB1/GNG5/GNAI2/GNAI3/PRKACB/GNB4/GLUL/SLC38A1/SLC38A2/GABARAPL2/GNB2/GNG7	13	B5
hsa04916	Melanogenesis	13/916	101/8035	0.364619	0.78914	0.633286	LEF1/TCF7L2/CALM2/GNAQ/GNAI2/GNAS/GNAI3/PRKACB/CREB1/CALM3/MAPK1/CREBBP/CTNNB1	13	B5
hsa05142	Chagas disease (American trypanosomiasis)	13/916	102/8035	0.37843	0.800095	0.642078	TNFRSF1A/PIK3R1/PIK3CD/GNAQ/GNAI2/SMAD2/GNAS/GNAI3/PPP2CA/MAPK1/PIK3CA/AKT3/PPP2R1A	13	B5
hsa04625	C-type lectin receptor signaling pathway	13/916	104/8035	0.406213	0.815115	0.654131	MDM2/PIK3R1/CALM2/RHOA/PIK3CD/MAPKAPK2/PPP3R1/CALM3/MAPK1/PIK3CA/AKT3/PPP3CC/IRF1	13	B5
hsa04726	Serotonergic synapse	13/916	115/8035	0.55718	0.993092	0.796958	GNG11/APP/GNAQ/GNB1/GNG5/GNAI2/GNAS/GNAI3/PRKACB/GNB4/MAPK1/GNB2/GNG7	13	B5
hsa03430	Mismatch repair	12/916	23/8035	1.83e-06	2.78e-05	2.23e-05	POLD3/RFC5/PCNA/RFC3/RFC4/MSH6/RPA1/LIG1/SSBP1/RFC1/POLD2/RPA3	12	B5
hsa03420	Nucleotide excision repair	12/916	47/8035	0.00530809	0.0349642	0.0280588	POLD3/RFC5/PCNA/RFC3/RFC4/RPA1/LIG1/POLE3/RFC1/RBX1/POLD2/RPA3	12	B5
hsa00010	Glycolysis / Gluconeogenesis	12/916	67/8035	0.074108	0.267318	0.214523	GAPDH/LDHB/PKM/PFKL/ADH5/ENO1/PGK1/LDHA/PDHB/PGAM1/ACSS1/TPI1	12	B5
hsa05223	Non-small cell lung cancer	12/916	68/8035	0.0811217	0.285813	0.229365	E2F2/E2F1/CDK6/FHIT/PIK3R1/PIK3CD/TP53/GADD45A/RB1/MAPK1/PIK3CA/AKT3	12	B5
hsa05235	PD-L1 expression and PD-1 checkpoint pathway in cancer	12/916	89/8035	0.313016	0.714575	0.573447	PIK3R1/PTEN/PIK3CD/MAP3K3/PPP3R1/HIF1A/MAPK1/PIK3CA/JAK1/AKT3/PPP3CC/CSNK2B	12	B5
hsa05032	Morphine addiction	12/916	91/8035	0.341221	0.746027	0.598688	GNG11/GRK2/GNB1/GNG5/GNAI2/GNAS/GNAI3/PRKACB/GNB4/GNB2/GNG7/PDE4B	12	B5
hsa05231	Choline metabolism in cancer	12/916	98/8035	0.442453	0.864923	0.694102	WASF2/PIK3R1/PIK3CD/DGKZ/RAC1/SLC44A2/HIF1A/MAPK1/PIK3CA/AKT3/RHEB/SLC44A1	12	B5
hsa04750	Inflammatory mediator regulation of TRP channels	12/916	100/8035	0.471428	0.904068	0.725516	PRKCH/PIK3R1/CALM2/PIK3CD/GNAQ/PPP1CA/GNAS/PRKACB/CALM3/PPP1CB/PIK3CA/PPP1CC	12	B5
hsa04660	T cell receptor signaling pathway	12/916	104/8035	0.528479	0.97048	0.778811	PIK3R1/RHOA/PIK3CD/PAK2/FYN/PPP3R1/MAPK1/PIK3CA/DLG1/AKT3/NCK2/PPP3CC	12	B5
hsa03410	Base excision repair	11/916	33/8035	0.000717667	0.00639568	0.00513254	HMGB1/POLD3/PCNA/FEN1/PARP1/LIG1/POLE3/TDG/APEX1/NEIL1/POLD2	11	B5
hsa04961	Endocrine and other factor-regulated calcium reabsorption	11/916	53/8035	0.0340962	0.161424	0.129543	ATP2B4/GNAQ/ATP1B3/GNAS/PRKACB/CLTC/AP2M1/RAB11A/CLTA/AP2B1/AP2S1	11	B5
hsa04923	Regulation of lipolysis in adipocytes	11/916	56/8035	0.0487505	0.205158	0.16464	NPY/PIK3R1/PIK3CD/IRS2/GNAI2/GNAS/GNAI3/PRKACB/PIK3CA/AKT3/INSR	11	B5
hsa00240	Pyrimidine metabolism	11/916	57/8035	0.0544584	0.222985	0.178946	RRM2/TYMS/TK1/DCK/RRM1/DTYMK/DUT/NT5C2/CTPS1/CMPK1/ENTPD4	11	B5
hsa05213	Endometrial cancer	11/916	58/8035	0.0605955	0.23539	0.188901	LEF1/TCF7L2/PIK3R1/PTEN/PIK3CD/TP53/GADD45A/MAPK1/PIK3CA/AKT3/CTNNB1	11	B5
hsa04137	Mitophagy - animal	11/916	68/8035	0.146423	0.440851	0.353784	E2F1/UBB/TP53/UBA52/HIF1A/CALCOCO2/GABARAPL2/CSNK2B/RAB7A/ATF4/TAX1BP1	11	B5
hsa04971	Gastric acid secretion	11/916	76/8035	0.244626	0.620277	0.497773	MYLK/ACTG1/ACTB/CALM2/GNAQ/ATP1B3/GNAI2/GNAS/GNAI3/PRKACB/CALM3	11	B5
hsa04540	Gap junction	11/916	88/8035	0.421015	0.82836	0.66476	CDK1/TUBB/GNAQ/GNAI2/GNAS/TUBA1B/GNAI3/PRKACB/TUBA1A/MAPK1/TUBB4B	11	B5
hsa04659	Th17 cell differentiation	11/916	107/8035	0.688272	1	0.802501	HSP90AA1/SMAD2/PPP3R1/RUNX1/HIF1A/MAPK1/JAK1/HLA-DRB5/HLA-DRA/PPP3CC/HLA-DMA	11	B5
hsa04630	JAK-STAT signaling pathway	11/916	162/8035	0.982482	1	0.802501	SOCS2/CCND3/FHL1/PIK3R1/PIK3CD/PIAS2/PIAS1/PIK3CA/JAK1/CREBBP/AKT3	11	B5
hsa05221	Acute myeloid leukemia	10/916	67/8035	0.228763	0.607386	0.487428	CCNA2/LEF1/JUP/TCF7L2/PIK3R1/PIK3CD/RUNX1/MAPK1/PIK3CA/AKT3	10	B5
hsa04924	Renin secretion	10/916	69/8035	0.257461	0.629118	0.504868	CALM2/GNAQ/GNAI2/GNAS/GNAI3/PRKACB/PPP3R1/CREB1/CALM3/PPP3CC	10	B5
hsa04070	Phosphatidylinositol signaling system	10/916	97/8035	0.680585	1	0.802501	PIK3R1/CALM2/PTEN/PIK3CD/DGKZ/CALM3/INPP5D/PIK3CA/MTMR6/CDS2	10	B5
hsa04925	Aldosterone synthesis and secretion	10/916	98/8035	0.693184	1	0.802501	CALM2/ATP2B4/GNAQ/ATP1B3/SCARB1/GNAS/PRKACB/CREB1/CALM3/ATF4	10	B5
hsa04933	AGE-RAGE signaling pathway in diabetic complications	10/916	100/8035	0.717448	1	0.802501	PIK3R1/PIK3CD/FOXO1/RAC1/SMAD2/DIAPH1/MAPK1/PIK3CA/AKT3/CDKN1B	10	B5
hsa05146	Amoebiasis	10/916	102/8035	0.740441	1	0.802501	ACTN1/PIK3R1/PIK3CD/GNAQ/GNAS/PRKACB/PRDX1/ACTN4/PIK3CA/RAB7A	10	B5
hsa04668	TNF signaling pathway	10/916	112/8035	0.836126	1	0.802501	TNFRSF1A/PIK3R1/PIK3CD/DNM1L/CREB1/MAPK1/PIK3CA/AKT3/IRF1/ATF4	10	B5
hsa05145	Toxoplasmosis	10/916	112/8035	0.836126	1	0.802501	TNFRSF1A/HSPA8/GNAI2/GNAI3/MAPK1/JAK1/AKT3/HLA-DRB5/HLA-DRA/HLA-DMA	10	B5
hsa05216	Thyroid cancer	9/916	37/8035	0.0204299	0.101788	0.081685	LEF1/TCF7L2/TP53/GADD45A/TPR/TPM3/NCOA4/MAPK1/CTNNB1	9	B5
hsa04962	Vasopressin-regulated water reabsorption	9/916	44/8035	0.0568517	0.226659	0.181894	ARHGDIB/GNAS/DYNLL1/PRKACB/CREB1/DYNC1H1/DYNC1LI2/RAB11A/ARHGDIA	9	B5
hsa03460	Fanconi anemia pathway	9/916	54/8035	0.156097	0.452315	0.362983	FANCI/UBE2T/BRCA1/USP1/POLH/RPA1/BRCA2/CENPX/RPA3	9	B5
hsa00480	Glutathione metabolism	9/916	57/8035	0.196287	0.540681	0.433897	RRM2/SMS/RRM1/IDH2/GGCT/GSTO1/PRDX6/GPX4/GSTK1	9	B5
hsa04370	VEGF signaling pathway	9/916	59/8035	0.22527	0.604043	0.484745	PIK3R1/PIK3CD/RAC1/MAPKAPK2/PPP3R1/MAPK1/PIK3CA/AKT3/PPP3CC	9	B5
hsa05416	Viral myocarditis	9/916	60/8035	0.240335	0.619468	0.497124	ACTG1/ACTB/RAC1/FYN/EIF4G2/HLA-DRB5/HLA-DRA/HLA-DMA/HLA-A	9	B5
hsa04664	Fc epsilon RI signaling pathway	9/916	68/8035	0.370338	0.790228	0.634159	PIK3R1/PIK3CD/GAB2/RAC1/FYN/MAPK1/INPP5D/PIK3CA/AKT3	9	B5
hsa05133	Pertussis	9/916	76/8035	0.505186	0.933362	0.749024	CFL1/CALM2/ITGA5/RHOA/GNAI2/GNAI3/CALM3/MAPK1/IRF1	9	B5
hsa00983	Drug metabolism - other enzymes	9/916	79/8035	0.553852	0.993001	0.796884	RRM2/TK1/RRM1/GMPS/HPRT1/DUT/GSTO1/IMPDH2/CMPK1	9	B5
hsa01521	EGFR tyrosine kinase inhibitor resistance	9/916	79/8035	0.553852	0.993001	0.796884	PIK3R1/PTEN/PIK3CD/RPS6/MAPK1/PIK3CA/JAK1/AKT3/GAB1	9	B5
hsa04146	Peroxisome	9/916	83/8035	0.61549	1	0.802501	SOD2/PXMP2/IDH2/AGPS/PRDX1/SCP2/SOD1/ABCD4/GSTK1	9	B5
hsa04012	ErbB signaling pathway	9/916	85/8035	0.644611	1	0.802501	PIK3R1/PIK3CD/PAK2/MAPK1/PIK3CA/AKT3/GAB1/NCK2/CDKN1B	9	B5
hsa04640	Hematopoietic cell lineage	9/916	99/8035	0.810251	1	0.802501	DNTT/CD34/MME/CD9/ITGA5/CD24/HLA-DRB5/HLA-DRA/HLA-DMA	9	B5
hsa04972	Pancreatic secretion	9/916	102/8035	0.836765	1	0.802501	RHOA/ATP2B4/GNAQ/ATP1B3/RAC1/RAP1B/GNAS/RAB11A/RAB8A	9	B5
hsa04142	Lysosome	9/916	128/8035	0.963663	1	0.802501	LAPTM5/CLTC/AP1S2/CLTA/AP1B1/LITAF/ENTPD4/GNPTAB/SCARB2	9	B5
hsa04650	Natural killer cell mediated cytotoxicity	9/916	131/8035	0.97005	1	0.802501	PIK3R1/PIK3CD/RAC1/FYN/PPP3R1/MAPK1/PIK3CA/PPP3CC/HLA-A	9	B5
hsa03450	Non-homologous end-joining	8/916	13/8035	2.11e-05	0.000277521	0.000222711	DNTT/FEN1/XRCC5/MRE11/PRKDC/XRCC6/DCLRE1C/LIG4	8	B5
hsa04216	Ferroptosis	8/916	41/8035	0.0882257	0.304663	0.244493	PCBP2/TP53/MAP1LC3B/PCBP1/NCOA4/VDAC2/VDAC3/GPX4	8	B5
hsa04930	Type II diabetes mellitus	8/916	46/8035	0.14695	0.440851	0.353784	SOCS2/PIK3R1/PIK3CD/PKM/IRS2/MAPK1/PIK3CA/INSR	8	B5
hsa01212	Fatty acid metabolism	8/916	57/8035	0.321851	0.714575	0.573447	HADH/CPT1A/ACADM/HACD3/HADHA/SCP2/ECHS1/ACAA2	8	B5
hsa04918	Thyroid hormone synthesis	8/916	75/8035	0.633915	1	0.802501	GNAQ/ATP1B3/TTF2/GNAS/PRKACB/CREB1/TTF1/ATF4	8	B5
hsa04612	Antigen processing and presentation	8/916	78/8035	0.678239	1	0.802501	HSP90AA1/HSPA8/PSME1/CREB1/HLA-DRB5/HLA-DRA/HLA-DMA/HLA-A	8	B5
hsa04658	Th1 and Th2 cell differentiation	8/916	92/8035	0.838165	1	0.802501	PPP3R1/MAPK1/JAK1/HLA-DRB5/HLA-DRA/PPP3CC/HLA-DMA/RBPJ	8	B5
hsa04912	GnRH signaling pathway	8/916	93/8035	0.846672	1	0.802501	CALM2/GNAQ/MAP3K3/GNAS/PRKACB/CALM3/MAPK1/ATF4	8	B5
hsa03008	Ribosome biogenesis in eukaryotes	8/916	112/8035	0.950548	1	0.802501	XPO1/RAN/NOP56/FBL/CSNK2B/XRN2/NHP2/NOP58	8	B5
hsa00620	Pyruvate metabolism	7/916	39/8035	0.149353	0.443665	0.356042	LDHB/PKM/ACYP1/MDH1/LDHA/PDHB/ACSS1	7	B5
hsa00071	Fatty acid degradation	7/916	44/8035	0.230526	0.607386	0.487428	HADH/ADH5/CPT1A/ACADM/HADHA/ECHS1/ACAA2	7	B5
hsa05030	Cocaine addiction	7/916	49/8035	0.322971	0.714575	0.573447	GPSM1/GNAI2/GNAS/GNAI3/PRKACB/CREB1/ATF4	7	B5
hsa05110	Vibrio cholerae infection	7/916	50/8035	0.342237	0.746027	0.598688	ACTG1/ACTB/GNAS/PRKACB/ATP6V1D/ATP6V1G1/ARF1	7	B5
hsa04330	Notch signaling pathway	7/916	53/8035	0.400639	0.815115	0.654131	CTBP2/HDAC2/SNW1/CTBP1/CREBBP/HDAC1/RBPJ	7	B5
hsa04730	Long-term depression	7/916	60/8035	0.534419	0.975475	0.78282	GNAQ/GNAI2/GNAS/GNAI3/PPP2CA/MAPK1/PPP2R1A	7	B5
hsa04917	Prolactin signaling pathway	7/916	70/8035	0.700019	1	0.802501	SOCS2/PIK3R1/PIK3CD/MAPK1/PIK3CA/AKT3/IRF1	7	B5
hsa05412	Arrhythmogenic right ventricular cardiomyopathy (ARVC)	7/916	77/8035	0.789914	1	0.802501	LEF1/JUP/ACTG1/TCF7L2/ACTB/ITGA5/CTNNB1	7	B5
hsa04721	Synaptic vesicle cycle	7/916	78/8035	0.800924	1	0.802501	CLTC/AP2M1/ATP6V1D/CLTA/ATP6V1G1/AP2B1/AP2S1	7	B5
hsa04970	Salivary secretion	7/916	93/8035	0.917859	1	0.802501	CALM2/ATP2B4/GNAQ/ATP1B3/GNAS/PRKACB/CALM3	7	B5
hsa05414	Dilated cardiomyopathy (DCM)	7/916	96/8035	0.932263	1	0.802501	ACTG1/ACTB/ITGA5/GNAS/PRKACB/TPM3/TPM4	7	B5
hsa04064	NF-kappa B signaling pathway	7/916	104/8035	0.960388	1	0.802501	TNFRSF1A/PARP1/UBE2I/GADD45A/BLNK/CSNK2B/ATM	7	B5
hsa04514	Cell adhesion molecules (CAMs)	7/916	148/8035	0.998679	1	0.802501	CD34/CD99/SPN/HLA-DRB5/HLA-DRA/HLA-DMA/HLA-A	7	B5
hsa03020	RNA polymerase	6/916	31/8035	0.134201	0.431185	0.346027	POLR2A/POLR2G/POLR3K/POLR2B/POLR2J/POLR1D	6	B5
hsa00640	Propanoate metabolism	6/916	34/8035	0.184642	0.518025	0.415715	LDHB/HADHA/LDHA/ECHS1/SUCLG1/ACSS1	6	B5
hsa04960	Aldosterone-regulated sodium reabsorption	6/916	37/8035	0.241245	0.619468	0.497124	PIK3R1/PIK3CD/ATP1B3/MAPK1/PIK3CA/INSR	6	B5
hsa05340	Primary immunodeficiency	6/916	38/8035	0.261167	0.632895	0.507899	IGLL1/ADA/RAG1/RAG2/DCLRE1C/BLNK	6	B5
hsa05219	Bladder cancer	6/916	41/8035	0.323092	0.714575	0.573447	E2F2/E2F1/MDM2/TP53/RB1/MAPK1	6	B5
hsa05014	Amyotrophic lateral sclerosis (ALS)	6/916	57/8035	0.644715	1	0.802501	TNFRSF1A/TP53/RAC1/PPP3R1/SOD1/PPP3CC	6	B5
hsa05134	Legionellosis	6/916	57/8035	0.644715	1	0.802501	HSPA8/EEF1A1/HBS1L/ARF1/CLK1/HSPD1	6	B5
hsa04929	GnRH secretion	6/916	64/8035	0.75277	1	0.802501	PIK3R1/PIK3CD/GNAQ/MAPK1/PIK3CA/AKT3	6	B5
hsa04927	Cortisol synthesis and secretion	6/916	65/8035	0.766048	1	0.802501	GNAQ/SCARB1/GNAS/PRKACB/CREB1/ATF4	6	B5
hsa00562	Inositol phosphate metabolism	6/916	73/8035	0.853662	1	0.802501	PTEN/PIK3CD/INPP5D/PIK3CA/MTMR6/TPI1	6	B5
hsa05140	Leishmaniasis	6/916	77/8035	0.886198	1	0.802501	EEF1A1/MAPK1/JAK1/HLA-DRB5/HLA-DRA/HLA-DMA	6	B5
hsa04911	Insulin secretion	6/916	86/8035	0.937652	1	0.802501	GNAQ/ATP1B3/GNAS/PRKACB/CREB1/ATF4	6	B5
hsa04620	Toll-like receptor signaling pathway	6/916	104/8035	0.983473	1	0.802501	PIK3R1/PIK3CD/RAC1/MAPK1/PIK3CA/AKT3	6	B5
hsa04740	Olfactory transduction	6/916	448/8035	1	1	0.802501	GRK2/CALM2/GNB1/PRKACB/CALM3/GNG7	6	B5
hsa00062	Fatty acid elongation	5/916	27/8035	0.187581	0.521442	0.418458	HADH/HACD3/HADHA/ECHS1/ACAA2	5	B5
hsa00020	Citrate cycle (TCA cycle)	5/916	30/8035	0.252289	0.621493	0.498749	IDH2/MDH1/SDHA/PDHB/SUCLG1	5	B5
hsa04136	Autophagy - other	5/916	32/8035	0.298105	0.698993	0.560943	PPP2CA/WIPI2/ATG3/GABARAPL2/IGBP1	5	B5
hsa04940	Type I diabetes mellitus	5/916	43/8035	0.552373	0.993001	0.796884	HLA-DRB5/HLA-DRA/HSPD1/HLA-DMA/HLA-A	5	B5
hsa03022	Basal transcription factors	5/916	45/8035	0.594296	1	0.802501	GTF2I/TAF15/TAF11/GTF2A2/TAF3	5	B5
hsa04973	Carbohydrate digestion and absorption	5/916	47/8035	0.633942	1	0.802501	PIK3R1/PIK3CD/ATP1B3/PIK3CA/AKT3	5	B5
hsa00280	Valine, leucine and isoleucine degradation	5/916	48/8035	0.652849	1	0.802501	HADH/ACADM/HADHA/ECHS1/ACAA2	5	B5
hsa04340	Hedgehog signaling pathway	5/916	50/8035	0.68875	1	0.802501	GRK2/PRKACB/CSNK1A1/CSNK1G2/SMURF2	5	B5
hsa05217	Basal cell carcinoma	5/916	63/8035	0.859878	1	0.802501	LEF1/TCF7L2/TP53/GADD45A/CTNNB1	5	B5
hsa04920	Adipocytokine signaling pathway	5/916	69/8035	0.907205	1	0.802501	NPY/TNFRSF1A/IRS2/CPT1A/AKT3	5	B5
hsa03320	PPAR signaling pathway	5/916	77/8035	0.948275	1	0.802501	FABP5/CPT1A/ACADM/SCP2/DBI	5	B5
hsa05410	Hypertrophic cardiomyopathy (HCM)	5/916	90/8035	0.981356	1	0.802501	ACTG1/ACTB/ITGA5/TPM3/TPM4	5	B5
hsa05323	Rheumatoid arthritis	5/916	93/8035	0.985423	1	0.802501	ATP6V1D/ATP6V1G1/HLA-DRB5/HLA-DRA/HLA-DMA	5	B5
hsa04657	IL-17 signaling pathway	5/916	94/8035	0.986581	1	0.802501	HSP90AA1/ELAVL1/SRSF1/MAPK1/ANAPC5	5	B5
hsa03060	Protein export	4/916	23/8035	0.263184	0.632895	0.507899	SRP14/SRP9/SEC63/SEC11A	4	B5
hsa00650	Butanoate metabolism	4/916	28/8035	0.39815	0.815115	0.654131	HADH/HADHA/ALDH5A1/ECHS1	4	B5
hsa04710	Circadian rhythm	4/916	31/8035	0.477784	0.908532	0.729098	SKP1/CREB1/FBXL3/RBX1	4	B5
hsa05020	Prion diseases	4/916	35/8035	0.576777	1	0.802501	FYN/PRKACB/MAPK1/SOD1	4	B5
hsa00250	Alanine, aspartate and glutamate metabolism	4/916	36/8035	0.599811	1	0.802501	ASRGL1/RIMKLB/GLUL/ALDH5A1	4	B5
hsa05330	Allograft rejection	4/916	38/8035	0.643538	1	0.802501	HLA-DRB5/HLA-DRA/HLA-DMA/HLA-A	4	B5
hsa05332	Graft-versus-host disease	4/916	42/8035	0.72112	1	0.802501	HLA-DRB5/HLA-DRA/HLA-DMA/HLA-A	4	B5
hsa04672	Intestinal immune network for IgA production	4/916	49/8035	0.825482	1	0.802501	HLA-DRB5/CXCR4/HLA-DRA/HLA-DMA	4	B5
hsa04979	Cholesterol metabolism	4/916	50/8035	0.837371	1	0.802501	VDAC1/SCARB1/VDAC2/VDAC3	4	B5
hsa04913	Ovarian steroidogenesis	4/916	51/8035	0.848575	1	0.802501	SCARB1/GNAS/PRKACB/INSR	4	B5
hsa05320	Autoimmune thyroid disease	4/916	53/8035	0.869031	1	0.802501	HLA-DRB5/HLA-DRA/HLA-DMA/HLA-A	4	B5
hsa05321	Inflammatory bowel disease (IBD)	4/916	65/8035	0.948259	1	0.802501	SMAD2/HLA-DRB5/HLA-DRA/HLA-DMA	4	B5
hsa05120	Epithelial cell signaling in Helicobacter pylori infection	4/916	70/8035	0.965725	1	0.802501	RAC1/ATP6V1D/ATP6V1G1/ADAM10	4	B5
hsa00980	Metabolism of xenobiotics by cytochrome P450	4/916	76/8035	0.979421	1	0.802501	ADH5/GSTO1/AKR7A2/GSTK1	4	B5
hsa04976	Bile secretion	4/916	90/8035	0.994087	1	0.802501	ATP1B3/SCARB1/GNAS/PRKACB	4	B5
hsa04974	Protein digestion and absorption	4/916	95/8035	0.996273	1	0.802501	MME/COL5A1/ATP1B3/SLC38A2	4	B5
hsa04080	Neuroactive ligand-receptor interaction	4/916	341/8035	1	1	0.802501	NPY/S1PR4/NR3C1/P2RX1	4	B5
hsa00100	Steroid biosynthesis	3/916	20/8035	0.403067	0.815115	0.654131	LBR/FDFT1/SC5D	3	B5
hsa00790	Folate biosynthesis	3/916	26/8035	0.58231	1	0.802501	DHFR/FPGS/AKR1B1	3	B5
hsa04744	Phototransduction	3/916	28/8035	0.633985	1	0.802501	CALM2/GNB1/CALM3	3	B5
hsa00030	Pentose phosphate pathway	3/916	30/8035	0.681036	1	0.802501	TKT/PFKL/TALDO1	3	B5
hsa00630	Glyoxylate and dicarboxylate metabolism	3/916	30/8035	0.681036	1	0.802501	GLUL/MDH1/ACSS1	3	B5
hsa00052	Galactose metabolism	3/916	31/8035	0.702813	1	0.802501	PFKL/AKR1B1/UGP2	3	B5
hsa01523	Antifolate resistance	3/916	31/8035	0.702813	1	0.802501	TYMS/DHFR/FPGS	3	B5
hsa05310	Asthma	3/916	31/8035	0.702813	1	0.802501	HLA-DRB5/HLA-DRA/HLA-DMA	3	B5
hsa00512	Mucin type O-glycan biosynthesis	3/916	32/8035	0.723436	1	0.802501	GALNT7/ST3GAL1/GALNT1	3	B5
hsa04215	Apoptosis - multiple species	3/916	32/8035	0.723436	1	0.802501	BIRC5/TNFRSF1A/PMAIP1	3	B5
hsa00051	Fructose and mannose metabolism	3/916	33/8035	0.742925	1	0.802501	PFKL/AKR1B1/TPI1	3	B5
hsa04130	SNARE interactions in vesicular transport	3/916	33/8035	0.742925	1	0.802501	STX16/VAMP8/VAMP5	3	B5
hsa00380	Tryptophan metabolism	3/916	42/8035	0.872639	1	0.802501	HADH/HADHA/ECHS1	3	B5
hsa00565	Ether lipid metabolism	3/916	49/8035	0.929481	1	0.802501	PAFAH1B3/AGPS/PAFAH1B1	3	B5
hsa00330	Arginine and proline metabolism	3/916	50/8035	0.93536	1	0.802501	SMS/P4HA2/AMD1	3	B5
hsa04978	Mineral absorption	3/916	59/8035	0.971185	1	0.802501	ATP2B4/ATP1B3/MT1X	3	B5
hsa00561	Glycerolipid metabolism	3/916	61/8035	0.976049	1	0.802501	DGKZ/AKR1B1/LPIN1	3	B5
hsa04623	Cytosolic DNA-sensing pathway	3/916	63/8035	0.980125	1	0.802501	POLR3K/ADAR/POLR1D	3	B5
hsa00970	Aminoacyl-tRNA biosynthesis	3/916	66/8035	0.985022	1	0.802501	QRSL1/TARS/DARS	3	B5
hsa04622	RIG-I-like receptor signaling pathway	3/916	70/8035	0.989781	1	0.802501	PIN1/DDX3X/RNF125	3	B5
hsa00982	Drug metabolism - cytochrome P450	3/916	71/8035	0.990721	1	0.802501	ADH5/GSTO1/GSTK1	3	B5
hsa05204	Chemical carcinogenesis	3/916	82/8035	0.996853	1	0.802501	ADH5/GSTO1/GSTK1	3	B5
hsa05150	Staphylococcus aureus infection	3/916	96/8035	0.999241	1	0.802501	HLA-DRB5/HLA-DRA/HLA-DMA	3	B5
hsa00564	Glycerophospholipid metabolism	3/916	98/8035	0.999382	1	0.802501	DGKZ/CDS2/LPIN1	3	B5
hsa04060	Cytokine-cytokine receptor interaction	3/916	294/8035	1	1	0.802501	TNFRSF1A/GDF11/CXCR4	3	B5
hsa00920	Sulfur metabolism	2/916	10/8035	0.31839	0.714575	0.573447	TST/MPST	2	B5
hsa00532	Glycosaminoglycan biosynthesis - chondroitin sulfate / dermatan sulfate	2/916	20/8035	0.682857	1	0.802501	CSGALNACT1/CHST15	2	B5
hsa00670	One carbon pool by folate	2/916	20/8035	0.682857	1	0.802501	TYMS/DHFR	2	B5
hsa04614	Renin-angiotensin system	2/916	23/8035	0.755751	1	0.802501	MME/LNPEP	2	B5
hsa04964	Proximal tubule bicarbonate reclamation	2/916	23/8035	0.755751	1	0.802501	ATP1B3/MDH1	2	B5
hsa01040	Biosynthesis of unsaturated fatty acids	2/916	27/8035	0.830103	1	0.802501	HACD3/SCP2	2	B5
hsa04966	Collecting duct acid secretion	2/916	27/8035	0.830103	1	0.802501	ATP6V1D/ATP6V1G1	2	B5
hsa04392	Hippo signaling pathway - multiple species	2/916	29/8035	0.859048	1	0.802501	MOB1A/LIMD1	2	B5
hsa00410	beta-Alanine metabolism	2/916	30/8035	0.871763	1	0.802501	HADHA/ECHS1	2	B5
hsa00040	Pentose and glucuronate interconversions	2/916	34/8035	0.91274	1	0.802501	AKR1B1/UGP2	2	B5
hsa00350	Tyrosine metabolism	2/916	35/8035	0.920869	1	0.802501	ADH5/COMT	2	B5
hsa00760	Nicotinate and nicotinamide metabolism	2/916	35/8035	0.920869	1	0.802501	NT5C2/NNT	2	B5
hsa00500	Starch and sucrose metabolism	2/916	36/8035	0.928282	1	0.802501	PGM2L1/UGP2	2	B5
hsa00513	Various types of N-glycan biosynthesis	2/916	39/8035	0.946774	1	0.802501	STT3B/MAN1A2	2	B5
hsa00260	Glycine, serine and threonine metabolism	2/916	40/8035	0.951858	1	0.802501	PHGDH/PGAM1	2	B5
hsa00514	Other types of O-glycan biosynthesis	2/916	47/8035	0.976436	1	0.802501	GALNT7/GALNT1	2	B5
hsa00600	Sphingolipid metabolism	2/916	47/8035	0.976436	1	0.802501	CERS6/CERK	2	B5
hsa00510	N-Glycan biosynthesis	2/916	50/8035	0.982746	1	0.802501	STT3B/MAN1A2	2	B5
hsa05144	Malaria	2/916	50/8035	0.982746	1	0.802501	CD81/GYPC	2	B5
hsa04512	ECM-receptor interaction	2/916	88/8035	0.999723	1	0.802501	HMMR/ITGA5	2	B5
hsa04061	Viral protein interaction with cytokine and cytokine receptor	2/916	100/8035	0.999928	1	0.802501	TNFRSF1A/CXCR4	2	B5
hsa00533	Glycosaminoglycan biosynthesis - keratan sulfate	1/916	14/8035	0.816587	1	0.802501	ST3GAL1	1	B5
hsa00603	Glycosphingolipid biosynthesis - globo and isoglobo series	1/916	15/8035	0.837533	1	0.802501	ST3GAL1	1	B5
hsa00604	Glycosphingolipid biosynthesis - ganglio series	1/916	15/8035	0.837533	1	0.802501	ST3GAL1	1	B5
hsa00730	Thiamine metabolism	1/916	16/8035	0.856089	1	0.802501	ACP1	1	B5
hsa00120	Primary bile acid biosynthesis	1/916	17/8035	0.872528	1	0.802501	SCP2	1	B5
hsa00910	Nitrogen metabolism	1/916	17/8035	0.872528	1	0.802501	GLUL	1	B5
hsa01210	2-Oxocarboxylic acid metabolism	1/916	18/8035	0.887091	1	0.802501	IDH2	1	B5
hsa00220	Arginine biosynthesis	1/916	21/8035	0.921543	1	0.802501	GLUL	1	B5
hsa00900	Terpenoid backbone biosynthesis	1/916	22/8035	0.930511	1	0.802501	FDPS	1	B5
hsa04977	Vitamin digestion and absorption	1/916	24/8035	0.945491	1	0.802501	SCARB1	1	B5
hsa04950	Maturity onset diabetes of the young	1/916	26/8035	0.957244	1	0.802501	HHEX	1	B5
hsa05143	African trypanosomiasis	1/916	37/8035	0.98877	1	0.802501	GNAQ	1	B5
hsa04975	Fat digestion and absorption	1/916	43/8035	0.994588	1	0.802501	SCARB1	1	B5
hsa02010	ABC transporters	1/916	45/8035	0.995758	1	0.802501	ABCD4	1	B5
hsa00520	Amino sugar and nucleotide sugar metabolism	1/916	48/8035	0.997056	1	0.802501	UGP2	1	B5
hsa00140	Steroid hormone biosynthesis	1/916	61/8035	0.999397	1	0.802501	COMT	1	B5
hsa00590	Arachidonic acid metabolism	1/916	63/8035	0.999527	1	0.802501	PTGES3	1	B5
hsa00830	Retinol metabolism	1/916	68/8035	0.999743	1	0.802501	ADH5	1	B5
hsa04742	Taste transduction	1/916	83/8035	0.999959	1	0.802501	PRKACB	1	B5
